# Supplementary material for: Single-Cell RNA-Seq Analysis Reveals Macrophages Are Involved in the Pathogenesis of Human Sporadic Acute Type A Aortic Dissection
Source: MDPI journal article supplement (doi:10.3390/biom13020399), 2023-02-20
Supplement: s1 [file s1]

**TABLE S1** Patient Information for Ascending Aortic Samples (n = 9).

| Variable                                 | AD1     | AD2     | AD3     | AD4     | AD5     | AD6     | Normal1                   | Normal2                   | Normal3                   |
|------------------------------------------|---------|---------|---------|---------|---------|---------|---------------------------|---------------------------|---------------------------|
| Gender                                   | M       | F       | F       | M       | M       | F       | M                         | M                         | M                         |
| Age (year)                               | 59      | 64      | 25      | 58      | 50      | 38      | 58                        | 57                        | 58                        |
| Ethnicity                                | Chinese                   | Chinese                   | Chinese                   |
| Race                                     | Asian                     | Asian                     | Asian                     |
| Diagnosis and<br>comments                | ATAAD   | ATAAD   | ATAAD   | ATAAD   | ATAAD   | ATAAD   | Heart transplant<br>donor | Heart transplant<br>donor | Heart transplant<br>donor |
| Smoking status                           | Yes     | No      | No      | No      | Yes     | No      | No                        | Yes                       | No                        |
| Diabetes mellitus                        | No      | No      | No      | Yes     | No      | No      | No                        | No                        | No                        |
| Hypertension                             | Yes     | Yes     | No      | Yes     | Yes     | Yes     | Yes                       | No                        | Yes                       |
| Chronic obstructive<br>pulmonary disease | No                        | No                        | No                        |
| Aortic value<br>regurgitation            | No      | Yes     | No      | Yes     | No      | No      | No                        | No                        | No                        |
| Bicuspid aortic<br>value                 | No                        | No                        | No                        |
| Reoperation                              | No                        | No                        | No                        |

*F, female; M, male; NA, not available; and ATAAD, acute type A aortic dissection.*
