# Supplementary material for: Single-Cell RNA-Seq Analysis Reveals Macrophages Are Involved in the Pathogenesis of Human Sporadic Acute Type A Aortic Dissection
Source: Biomolecules. 2023 Feb 20;13(2):399. doi: 10.3390/biom13020399 (PMC9952989; doi:10.3390/biom13020399)
Supplement: Supplementary file 1 [file biomolecules-13-00399-s001.zip]

Archive with 12 entries (12 files):
- Supplementary Figure S1.tif
- Supplementary Figure S2.tif
- Supplementary Material.pdf
- Table S1.pdf
- Table S2.xlsx
- Table S3.xlsx
- Table S4.xlsx
- Table S5.xlsx
- Table S6.xlsx
- Table S7.xlsx
- Table S8.xlsx
- Table S9.xlsx
