# Supplementary material for: Single-Cell RNA-Seq Analysis Reveals Macrophages Are Involved in the Pathogenesis of Human Sporadic Acute Type A Aortic Dissection
Source: Biomolecules. 2023 Feb 20;13(2):399. doi: 10.3390/biom13020399 (PMC9952989; doi:10.3390/biom13020399)
Supplement: Supplementary file 1 [file biomolecules-13-00399-s001.zip › Table S2.xlsx]

## Sheet: Sheet1
Table S2. Number and proportion of each cell
	AD		Normal
Celltype	Numbers	Percentage	Numbers	Percentage
Fibroblasts	6076	0.1092	3857	0.1613
T_lymphocytes	13715	0.2465	6078	0.2542
Macrophages	13634	0.2451	3274	0.1369
B_lymphocytes	934	0.0168	143	0.006
Monocytes	6461	0.1161	3200	0.1338
Mast_cells	107	0.0019	144	0.006
Smooth_muscle_cell	9958	0.179	3885	0.1625
Plasmocyte	247	0.0044	171	0.0072
Endothelial_cells	3180	0.0572	2034	0.0851
Mesenchymal	1322	0.0238	1124	0.047
Sum	55634	1	23910	1
