# Supplementary material for: Single-Cell RNA-Seq Analysis Reveals Macrophages Are Involved in the Pathogenesis of Human Sporadic Acute Type A Aortic Dissection
Source: Biomolecules. 2023 Feb 20;13(2):399. doi: 10.3390/biom13020399 (PMC9952989; doi:10.3390/biom13020399)
Supplement: Supplementary file 1 [file biomolecules-13-00399-s001.zip › Table S3.xlsx]

## Sheet: Sheet1
Table S3. Top 10 DEGs among the 10 major clusters defined in ascending aorta tissue
GeneID	gene_id	log2FC	Pvlaue	Qvalue	pct.1	pct.2	Description	GO	KEGG	significant	Clsuter
ENSG00000213088	ACKR1	4.00381	0	0	0.627	0.03	atypical chemokine receptor 1 (Duffy blood group) [Source:HGNC Symbol;Acc:HGNC:4035]	GO:0004888(transmembrane signaling receptor activity);GO:0004930(G protein-coupled receptor activity);GO:0005768(endosome);GO:0005769(early endosome);GO:0005886(plasma membrane);GO:0006952(defense response);GO:0006954(inflammatory response);GO:0007165(signal transduction);GO:0007186(G protein-coupled receptor signaling pathway);GO:0016020(membrane);GO:0016021(integral component of membrane);GO:00…	05144(Malaria)	yes	endothelial cells
ENSG00000110799	VWF	3.64593	0	0	0.864	0.028	von Willebrand factor [Source:HGNC Symbol;Acc:HGNC:12726]	GO:0002020(protease binding);GO:0002576(platelet degranulation);GO:0005178(integrin binding);GO:0005201(extracellular matrix structural constituent);GO:0005515(protein binding);GO:0005518(collagen binding);GO:0005576(extracellular region);GO:0005783(endoplasmic reticulum);GO:0007155(cell adhesion);GO:0007596(blood coagulation);GO:0007597(blood coagulation, intrinsic pathway);GO:0007599(hemostasis…	04151(PI3K-Akt signaling pathway);04510(Focal adhesion);04512(ECM-receptor interaction);04610(Complement and coagulation cascades);04611(Platelet activation);05165(Human papillomavirus infection)	yes	endothelial cells
ENSG00000165949	IFI27	3.41285	0	0	0.896	0.125	interferon alpha inducible protein 27 [Source:HGNC Symbol;Acc:HGNC:5397]	GO:0000122(negative regulation of transcription by RNA polymerase II);GO:0001102(RNA polymerase II activating transcription factor binding);GO:0002376(immune system process);GO:0003674(molecular_function);GO:0005515(protein binding);GO:0005521(lamin binding);GO:0005634(nucleus);GO:0005635(nuclear envelope);GO:0005637(nuclear inner membrane);GO:0005739(mitochondrion);GO:0005741(mitochondrial outer…	NA	yes	endothelial cells
ENSG00000133110	POSTN	3.33179	0	0	0.672	0.062	periostin [Source:HGNC Symbol;Acc:HGNC:16953]	GO:0001666(response to hypoxia);GO:0001953(negative regulation of cell-matrix adhesion);GO:0003073(regulation of systemic arterial blood pressure);GO:0005201(extracellular matrix structural constituent);GO:0005515(protein binding);GO:0005576(extracellular region);GO:0005615(extracellular space);GO:0005737(cytoplasm);GO:0005794(Golgi apparatus);GO:0005802(trans-Golgi network);GO:0007155(cell adhes…	NA	yes	endothelial cells
ENSG00000184113	CLDN5	3.28694	0	0	0.75	0.012	claudin 5 [Source:HGNC Symbol;Acc:HGNC:2047]	GO:0003151(outflow tract morphogenesis);GO:0005198(structural molecule activity);GO:0005886(plasma membrane);GO:0005911(cell-cell junction);GO:0005923(bicellular tight junction);GO:0007043(cell-cell junction assembly);GO:0007179(transforming growth factor beta receptor signaling pathway);GO:0007612(learning);GO:0016020(membrane);GO:0016021(integral component of membrane);GO:0016327(apicolateral p…	04514(Cell adhesion molecules (CAMs));04530(Tight junction);04670(Leukocyte transendothelial migration);05160(Hepatitis C)	yes	endothelial cells
ENSG00000130300	PLVAP	3.07001	0	0	0.778	0.021	plasmalemma vesicle associated protein [Source:HGNC Symbol;Acc:HGNC:13635]	GO:0000165(MAPK cascade);GO:0002693(positive regulation of cellular extravasation);GO:0005515(protein binding);GO:0005737(cytoplasm);GO:0005886(plasma membrane);GO:0005901(caveola);GO:0009986(cell surface);GO:0016020(membrane);GO:0016021(integral component of membrane);GO:0033209(tumor necrosis factor-mediated signaling pathway);GO:0042803(protein homodimerization activity);GO:0048471(perinuclear…	NA	yes	endothelial cells
ENSG00000261371	PECAM1	2.93485	0	0	0.933	0.131	platelet and endothelial cell adhesion molecule 1 [Source:HGNC Symbol;Acc:HGNC:8823]	GO:0001525(angiogenesis);GO:0001886(endothelial cell morphogenesis);GO:0002576(platelet degranulation);GO:0005515(protein binding);GO:0005615(extracellular space);GO:0005737(cytoplasm);GO:0005886(plasma membrane);GO:0006909(phagocytosis);GO:0007155(cell adhesion);GO:0007156(homophilic cell adhesion via plasma membrane adhesion molecules);GO:0007159(leukocyte cell-cell adhesion);GO:0007165(signal …	04514(Cell adhesion molecules (CAMs));04670(Leukocyte transendothelial migration);05144(Malaria);05418(Fluid shear stress and atherosclerosis)	yes	endothelial cells
ENSG00000172889	EGFL7	2.49848	0	0	0.848	0.06	EGF like domain multiple 7 [Source:HGNC Symbol;Acc:HGNC:20594]	GO:0001525(angiogenesis);GO:0001568(blood vessel development);GO:0001570(vasculogenesis);GO:0001938(positive regulation of endothelial cell proliferation);GO:0005102(signaling receptor binding);GO:0005509(calcium ion binding);GO:0005515(protein binding);GO:0005576(extracellular region);GO:0005615(extracellular space);GO:0007155(cell adhesion);GO:0007275(multicellular organism development);GO:0009…	NA	yes	endothelial cells
ENSG00000162618	ADGRL4	2.43442	0	0	0.792	0.009	adhesion G protein-coupled receptor L4 [Source:HGNC Symbol;Acc:HGNC:20822]	GO:0004888(transmembrane signaling receptor activity);GO:0004930(G protein-coupled receptor activity);GO:0005509(calcium ion binding);GO:0005886(plasma membrane);GO:0005887(integral component of plasma membrane);GO:0007165(signal transduction);GO:0007166(cell surface receptor signaling pathway);GO:0007186(G protein-coupled receptor signaling pathway);GO:0007189(adenylate cyclase-activating G prot…	NA	yes	endothelial cells
ENSG00000159167	STC1	2.42742	0	0	0.392	0.009	stanniocalcin 1 [Source:HGNC Symbol;Acc:HGNC:11373]	GO:0001503(ossification);GO:0001886(endothelial cell morphogenesis);GO:0003421(growth plate cartilage axis specification);GO:0005179(hormone activity);GO:0005576(extracellular region);GO:0005615(extracellular space);GO:0005634(nucleus);GO:0005737(cytoplasm);GO:0006874(cellular calcium ion homeostasis);GO:0007566(embryo implantation);GO:0010469(regulation of signaling receptor activity);GO:0010596…	NA	yes	endothelial cells
ENSG00000133392	MYH11	3.40788	0	0	0.824	0.152	myosin heavy chain 11 [Source:HGNC Symbol;Acc:HGNC:7569]	GO:0000166(nucleotide binding);GO:0003774(motor activity);GO:0003779(actin binding);GO:0005515(protein binding);GO:0005516(calmodulin binding);GO:0005524(ATP binding);GO:0005829(cytosol);GO:0005859(muscle myosin complex);GO:0006936(muscle contraction);GO:0006939(smooth muscle contraction);GO:0008307(structural constituent of muscle);GO:0016459(myosin complex);GO:0030241(skeletal muscle myosin thi…	04270(Vascular smooth muscle contraction);04530(Tight junction)	yes	Smooth muscle cells
ENSG00000198467	TPM2	3.16721	0	0	0.972	0.322	tropomyosin 2 [Source:HGNC Symbol;Acc:HGNC:12011]	GO:0003779(actin binding);GO:0005737(cytoplasm);GO:0005829(cytosol);GO:0005856(cytoskeleton);GO:0005862(muscle thin filament tropomyosin);GO:0005884(actin filament);GO:0006936(muscle contraction);GO:0007015(actin filament organization);GO:0008307(structural constituent of muscle);GO:0015629(actin cytoskeleton);GO:0030049(muscle filament sliding);GO:0042802(identical protein binding);GO:0042803(pr…	04260(Cardiac muscle contraction);04261(Adrenergic signaling in cardiomyocytes);05410(Hypertrophic cardiomyopathy (HCM));05414(Dilated cardiomyopathy (DCM))	yes	Smooth muscle cells
ENSG00000149591	TAGLN	3.12013	0	0	0.97	0.368	transgelin [Source:HGNC Symbol;Acc:HGNC:11553]	GO:0003779(actin binding);GO:0005515(protein binding);GO:0005737(cytoplasm);GO:0007517(muscle organ development);GO:0030855(epithelial cell differentiation);GO:0051015(actin filament binding)	NA	yes	Smooth muscle cells
ENSG00000107796	ACTA2	3.1185	0	0	0.857	0.218	actin, alpha 2, smooth muscle, aorta [Source:HGNC Symbol;Acc:HGNC:130]	GO:0000166(nucleotide binding);GO:0005524(ATP binding);GO:0005615(extracellular space);GO:0005737(cytoplasm);GO:0005829(cytosol);GO:0005856(cytoskeleton);GO:0006936(muscle contraction);GO:0008217(regulation of blood pressure);GO:0009615(response to virus);GO:0010628(positive regulation of gene expression);GO:0014829(vascular smooth muscle contraction);GO:0015629(actin cytoskeleton);GO:0019901(pro…	04270(Vascular smooth muscle contraction);04371(Apelin signaling pathway);04926(Relaxin signaling pathway)	yes	Smooth muscle cells
ENSG00000143248	RGS5	3.03926	0	0	0.757	0.092	regulator of G protein signaling 5 [Source:HGNC Symbol;Acc:HGNC:10001]	GO:0003924(GTPase activity);GO:0005096(GTPase activator activity);GO:0005737(cytoplasm);GO:0005829(cytosol);GO:0005886(plasma membrane);GO:0007186(G protein-coupled receptor signaling pathway);GO:0008277(regulation of G protein-coupled receptor signaling pathway);GO:0009968(negative regulation of signal transduction);GO:0016020(membrane);GO:0043547(positive regulation of GTPase activity)	NA	yes	Smooth muscle cells
ENSG00000122786	CALD1	3.01098	0	0	0.987	0.349	caldesmon 1 [Source:HGNC Symbol;Acc:HGNC:1441]	GO:0003779(actin binding);GO:0005515(protein binding);GO:0005516(calmodulin binding);GO:0005523(tropomyosin binding);GO:0005737(cytoplasm);GO:0005829(cytosol);GO:0005856(cytoskeleton);GO:0005886(plasma membrane);GO:0006936(muscle contraction);GO:0015629(actin cytoskeleton);GO:0016020(membrane);GO:0017022(myosin binding);GO:0030016(myofibril);GO:0030478(actin cap);GO:0043231(intracellular membrane…	04270(Vascular smooth muscle contraction)	yes	Smooth muscle cells
ENSG00000111341	MGP	2.98892	0	0	0.993	0.599	matrix Gla protein [Source:HGNC Symbol;Acc:HGNC:7060]	GO:0001502(cartilage condensation);GO:0001503(ossification);GO:0005201(extracellular matrix structural constituent);GO:0005509(calcium ion binding);GO:0005515(protein binding);GO:0005576(extracellular region);GO:0007275(multicellular organism development);GO:0008147(structural constituent of bone);GO:0030154(cell differentiation);GO:0030500(regulation of bone mineralization);GO:0031012(extracellu…	NA	yes	Smooth muscle cells
ENSG00000101335	MYL9	2.97527	0	0	0.938	0.254	myosin light chain 9 [Source:HGNC Symbol;Acc:HGNC:15754]	GO:0001725(stress fiber);GO:0005509(calcium ion binding);GO:0005829(cytosol);GO:0005859(muscle myosin complex);GO:0006936(muscle contraction);GO:0006937(regulation of muscle contraction);GO:0008307(structural constituent of muscle);GO:0016459(myosin complex);GO:0016460(myosin II complex);GO:0030018(Z disc);GO:0032036(myosin heavy chain binding);GO:0045652(regulation of megakaryocyte differentiati…	04022(cGMP-PKG signaling pathway);04024(cAMP signaling pathway);04270(Vascular smooth muscle contraction);04360(Axon guidance);04510(Focal adhesion);04530(Tight junction);04670(Leukocyte transendothelial migration);04810(Regulation of actin cytoskeleton);04921(Oxytocin signaling pathway)	yes	Smooth muscle cells
ENSG00000182492	BGN	2.9319	0	0	0.976	0.305	biglycan [Source:HGNC Symbol;Acc:HGNC:1044]	GO:0001974(blood vessel remodeling);GO:0005201(extracellular matrix structural constituent);GO:0005515(protein binding);GO:0005539(glycosaminoglycan binding);GO:0005576(extracellular region);GO:0005796(Golgi lumen);GO:0008150(biological_process);GO:0009986(cell surface);GO:0019800(peptide cross-linking via chondroitin 4-sulfate glycosaminoglycan);GO:0030021(extracellular matrix structural constit…	NA	yes	Smooth muscle cells
ENSG00000148671	ADIRF	2.90961	0	0	0.927	0.285	adipogenesis regulatory factor [Source:HGNC Symbol;Acc:HGNC:24043]	GO:0003674(molecular_function);GO:0005634(nucleus);GO:0005654(nucleoplasm);GO:0005829(cytosol);GO:0030154(cell differentiation);GO:0045600(positive regulation of fat cell differentiation);GO:0045944(positive regulation of transcription by RNA polymerase II);GO:0070062(extracellular exosome);GO:0071478(cellular response to radiation);GO:0072719(cellular response to cisplatin);GO:2001023(regulation…	NA	yes	Smooth muscle cells
ENSG00000189058	APOD	5.40146	0	0	0.709	0.183	apolipoprotein D [Source:HGNC Symbol;Acc:HGNC:612]	GO:0000302(response to reactive oxygen species);GO:0001525(angiogenesis);GO:0005319(lipid transporter activity);GO:0005515(protein binding);GO:0005576(extracellular region);GO:0005615(extracellular space);GO:0005737(cytoplasm);GO:0005783(endoplasmic reticulum);GO:0006006(glucose metabolic process);GO:0006629(lipid metabolic process);GO:0006869(lipid transport);GO:0007420(brain development);GO:000…	NA	yes	Fibroblast
ENSG00000197766	CFD	4.75996	0	0	0.698	0.28	complement factor D [Source:HGNC Symbol;Acc:HGNC:2771]	GO:0002376(immune system process);GO:0002576(platelet degranulation);GO:0004252(serine-type endopeptidase activity);GO:0005576(extracellular region);GO:0005615(extracellular space);GO:0006508(proteolysis);GO:0006956(complement activation);GO:0006957(complement activation, alternative pathway);GO:0008233(peptidase activity);GO:0008236(serine-type peptidase activity);GO:0009617(response to bacteriu…	04610(Complement and coagulation cascades);05150(Staphylococcus aureus infection)	yes	Fibroblast
ENSG00000188257	PLA2G2A	4.66412	0	0	0.582	0.127	phospholipase A2 group IIA [Source:HGNC Symbol;Acc:HGNC:9031]	GO:0004623(phospholipase A2 activity);GO:0005509(calcium ion binding);GO:0005543(phospholipid binding);GO:0005576(extracellular region);GO:0005615(extracellular space);GO:0005783(endoplasmic reticulum);GO:0005789(endoplasmic reticulum membrane);GO:0005886(plasma membrane);GO:0006629(lipid metabolic process);GO:0006644(phospholipid metabolic process);GO:0006654(phosphatidic acid biosynthetic proce…	00564(Glycerophospholipid metabolism);00565(Ether lipid metabolism);00590(Arachidonic acid metabolism);00591(Linoleic acid metabolism);00592(alpha-Linolenic acid metabolism);04014(Ras signaling pathway);04270(Vascular smooth muscle contraction);04972(Pancreatic secretion);04975(Fat digestion and absorption)	yes	Fibroblast
ENSG00000011465	DCN	4.31609	0	0	0.792	0.235	decorin [Source:HGNC Symbol;Acc:HGNC:2705]	GO:0001822(kidney development);GO:0001890(placenta development);GO:0003723(RNA binding);GO:0005515(protein binding);GO:0005518(collagen binding);GO:0005539(glycosaminoglycan binding);GO:0005576(extracellular region);GO:0005589(collagen type VI trimer);GO:0005615(extracellular space);GO:0005796(Golgi lumen);GO:0007519(skeletal muscle tissue development);GO:0007568(aging);GO:0009612(response to mec…	04350(TGF-beta signaling pathway);05205(Proteoglycans in cancer)	yes	Fibroblast
ENSG00000125730	C3	3.44924	0	0	0.688	0.104	complement C3 [Source:HGNC Symbol;Acc:HGNC:1318]	GO:0001798(positive regulation of type IIa hypersensitivity);GO:0001934(positive regulation of protein phosphorylation);GO:0001970(positive regulation of activation of membrane attack complex);GO:0002376(immune system process);GO:0004866(endopeptidase inhibitor activity);GO:0005102(signaling receptor binding);GO:0005515(protein binding);GO:0005576(extracellular region);GO:0005615(extracellular sp…	04080(Neuroactive ligand-receptor interaction);04145(Phagosome);04610(Complement and coagulation cascades);05133(Pertussis);05134(Legionellosis);05140(Leishmaniasis);05142(Chagas disease (American trypanosomiasis));05150(Staphylococcus aureus infection);05152(Tuberculosis);05167(Kaposi sarcoma-associated herpesvirus infection);05168(Herpes simplex virus 1 infection);05203(Viral carcinogenesis);05…	yes	Fibroblast
ENSG00000077942	FBLN1	3.42693	0	0	0.804	0.151	fibulin 1 [Source:HGNC Symbol;Acc:HGNC:3600]	GO:0001933(negative regulation of protein phosphorylation);GO:0001968(fibronectin binding);GO:0005201(extracellular matrix structural constituent);GO:0005509(calcium ion binding);GO:0005576(extracellular region);GO:0005604(basement membrane);GO:0005615(extracellular space);GO:0007162(negative regulation of cell adhesion);GO:0007566(embryo implantation);GO:0008022(protein C-terminus binding);GO:00…	NA	yes	Fibroblast
ENSG00000145824	CXCL14	3.35147	0	0	0.449	0.044	C-X-C motif chemokine ligand 14 [Source:HGNC Symbol;Acc:HGNC:10640]	GO:0005125(cytokine activity);GO:0005515(protein binding);GO:0005576(extracellular region);GO:0005615(extracellular space);GO:0005794(Golgi apparatus);GO:0006935(chemotaxis);GO:0006955(immune response);GO:0007165(signal transduction);GO:0007267(cell-cell signaling);GO:0008009(chemokine activity);GO:0010469(regulation of signaling receptor activity);GO:0045662(negative regulation of myoblast diffe…	04060(Cytokine-cytokine receptor interaction);04062(Chemokine signaling pathway)	yes	Fibroblast
ENSG00000132386	SERPINF1	3.21818	0	0	0.722	0.134	serpin family F member 1 [Source:HGNC Symbol;Acc:HGNC:8824]	GO:0001822(kidney development);GO:0004867(serine-type endopeptidase inhibitor activity);GO:0005515(protein binding);GO:0005576(extracellular region);GO:0005604(basement membrane);GO:0005615(extracellular space);GO:0007275(multicellular organism development);GO:0007568(aging);GO:0007614(short-term memory);GO:0008283(cell population proliferation);GO:0010447(response to acidic pH);GO:0010596(negati…	04310(Wnt signaling pathway)	yes	Fibroblast
ENSG00000197614	MFAP5	3.12921	0	0	0.625	0.062	microfibril associated protein 5 [Source:HGNC Symbol;Acc:HGNC:29673]	GO:0001527(microfibril);GO:0005201(extracellular matrix structural constituent);GO:0005576(extracellular region);GO:0030198(extracellular matrix organization);GO:0031012(extracellular matrix);GO:0060216(definitive hemopoiesis);GO:0062023(collagen-containing extracellular matrix);GO:0097435(supramolecular fiber organization)	NA	yes	Fibroblast
ENSG00000112936	C7	3.12047	0	0	0.557	0.104	complement C7 [Source:HGNC Symbol;Acc:HGNC:1346]	GO:0002376(immune system process);GO:0005515(protein binding);GO:0005576(extracellular region);GO:0005579(membrane attack complex);GO:0006883(cellular sodium ion homeostasis);GO:0006955(immune response);GO:0006956(complement activation);GO:0006957(complement activation, alternative pathway);GO:0006958(complement activation, classical pathway);GO:0019835(cytolysis);GO:0030449(regulation of complem…	04610(Complement and coagulation cascades);05020(Prion diseases);05322(Systemic lupus erythematosus)	yes	Fibroblast
ENSG00000149591	TAGLN	3.03097	0	0	0.975	0.457	transgelin [Source:HGNC Symbol;Acc:HGNC:11553]	GO:0003779(actin binding);GO:0005515(protein binding);GO:0005737(cytoplasm);GO:0007517(muscle organ development);GO:0030855(epithelial cell differentiation);GO:0051015(actin filament binding)	NA	yes	Mesenchymal cells
ENSG00000107796	ACTA2	2.84408	0	0	0.913	0.31	actin, alpha 2, smooth muscle, aorta [Source:HGNC Symbol;Acc:HGNC:130]	GO:0000166(nucleotide binding);GO:0005524(ATP binding);GO:0005615(extracellular space);GO:0005737(cytoplasm);GO:0005829(cytosol);GO:0005856(cytoskeleton);GO:0006936(muscle contraction);GO:0008217(regulation of blood pressure);GO:0009615(response to virus);GO:0010628(positive regulation of gene expression);GO:0014829(vascular smooth muscle contraction);GO:0015629(actin cytoskeleton);GO:0019901(pro…	04270(Vascular smooth muscle contraction);04371(Apelin signaling pathway);04926(Relaxin signaling pathway)	yes	Mesenchymal cells
ENSG00000101335	MYL9	2.8257	0	0	0.965	0.354	myosin light chain 9 [Source:HGNC Symbol;Acc:HGNC:15754]	GO:0001725(stress fiber);GO:0005509(calcium ion binding);GO:0005829(cytosol);GO:0005859(muscle myosin complex);GO:0006936(muscle contraction);GO:0006937(regulation of muscle contraction);GO:0008307(structural constituent of muscle);GO:0016459(myosin complex);GO:0016460(myosin II complex);GO:0030018(Z disc);GO:0032036(myosin heavy chain binding);GO:0045652(regulation of megakaryocyte differentiati…	04022(cGMP-PKG signaling pathway);04024(cAMP signaling pathway);04270(Vascular smooth muscle contraction);04360(Axon guidance);04510(Focal adhesion);04530(Tight junction);04670(Leukocyte transendothelial migration);04810(Regulation of actin cytoskeleton);04921(Oxytocin signaling pathway)	yes	Mesenchymal cells
ENSG00000198467	TPM2	2.68824	0	0	0.98	0.418	tropomyosin 2 [Source:HGNC Symbol;Acc:HGNC:12011]	GO:0003779(actin binding);GO:0005737(cytoplasm);GO:0005829(cytosol);GO:0005856(cytoskeleton);GO:0005862(muscle thin filament tropomyosin);GO:0005884(actin filament);GO:0006936(muscle contraction);GO:0007015(actin filament organization);GO:0008307(structural constituent of muscle);GO:0015629(actin cytoskeleton);GO:0030049(muscle filament sliding);GO:0042802(identical protein binding);GO:0042803(pr…	04260(Cardiac muscle contraction);04261(Adrenergic signaling in cardiomyocytes);05410(Hypertrophic cardiomyopathy (HCM));05414(Dilated cardiomyopathy (DCM))	yes	Mesenchymal cells
ENSG00000140416	TPM1	2.62968	0	0	0.919	0.375	tropomyosin 1 [Source:HGNC Symbol;Acc:HGNC:12010]	GO:0001701(in utero embryonic development);GO:0001725(stress fiber);GO:0003065(positive regulation of heart rate by epinephrine);GO:0003779(actin binding);GO:0005200(structural constituent of cytoskeleton);GO:0005515(protein binding);GO:0005737(cytoplasm);GO:0005829(cytosol);GO:0005856(cytoskeleton);GO:0005862(muscle thin filament tropomyosin);GO:0005884(actin filament);GO:0006936(muscle contract…	04260(Cardiac muscle contraction);04261(Adrenergic signaling in cardiomyocytes);05206(MicroRNAs in cancer);05410(Hypertrophic cardiomyopathy (HCM));05414(Dilated cardiomyopathy (DCM))	yes	Mesenchymal cells
ENSG00000185633	NDUFA4L2	2.27435	0	0	0.556	0.099	NDUFA4, mitochondrial complex associated like 2 [Source:HGNC Symbol;Acc:HGNC:29836]	GO:0004129(cytochrome-c oxidase activity);GO:0005751(mitochondrial respiratory chain complex IV);GO:0016020(membrane);GO:0016021(integral component of membrane);GO:0022900(electron transport chain);GO:1902600(proton transmembrane transport)	00190(Oxidative phosphorylation);04714(Thermogenesis);04723(Retrograde endocannabinoid signaling);04932(Non-alcoholic fatty liver disease (NAFLD));05010(Alzheimer disease);05012(Parkinson disease);05016(Huntington disease)	yes	Mesenchymal cells
ENSG00000187479	C11orf96	2.26422	0	0	0.978	0.351	chromosome 11 open reading frame 96 [Source:HGNC Symbol;Acc:HGNC:38675]	NA	NA	yes	Mesenchymal cells
ENSG00000125868	DSTN	2.24549	0	0	0.973	0.539	destrin, actin depolymerizing factor [Source:HGNC Symbol;Acc:HGNC:15750]	GO:0003779(actin binding);GO:0005515(protein binding);GO:0005622(intracellular);GO:0005737(cytoplasm);GO:0008154(actin polymerization or depolymerization);GO:0015629(actin cytoskeleton);GO:0030042(actin filament depolymerization);GO:0030043(actin filament fragmentation);GO:0030836(positive regulation of actin filament depolymerization);GO:0030864(cortical actin cytoskeleton);GO:0051014(actin fila…	NA	yes	Mesenchymal cells
ENSG00000205364	MT1M	2.21241	0	0	0.714	0.23	metallothionein 1M [Source:HGNC Symbol;Acc:HGNC:14296]	GO:0005634(nucleus);GO:0005737(cytoplasm);GO:0006882(cellular zinc ion homeostasis);GO:0008270(zinc ion binding);GO:0010273(detoxification of copper ion);GO:0045926(negative regulation of growth);GO:0046872(metal ion binding);GO:0048471(perinuclear region of cytoplasm);GO:0071276(cellular response to cadmium ion);GO:0071280(cellular response to copper ion);GO:0071294(cellular response to zinc ion)	04978(Mineral absorption)	yes	Mesenchymal cells
ENSG00000172724	CCL19	2.17476	2.83724e-136	1.23233e-131	0.139	0.04	C-C motif chemokine ligand 19 [Source:HGNC Symbol;Acc:HGNC:10617]	GO:0001768(establishment of T cell polarity);GO:0001771(immunological synapse formation);GO:0002407(dendritic cell chemotaxis);GO:0002408(myeloid dendritic cell chemotaxis);GO:0002548(monocyte chemotaxis);GO:0002606(positive regulation of dendritic cell antigen processing and presentation);GO:0005125(cytokine activity);GO:0005576(extracellular region);GO:0005615(extracellular space);GO:0005623(ce…	04060(Cytokine-cytokine receptor interaction);04062(Chemokine signaling pathway);04064(NF-kappa B signaling pathway)	yes	Mesenchymal cells
ENSG00000168685	IL7R	3.87332	0	0	0.724	0.093	interleukin 7 receptor [Source:HGNC Symbol;Acc:HGNC:6024]	GO:0000018(regulation of DNA recombination);GO:0000902(cell morphogenesis);GO:0001915(negative regulation of T cell mediated cytotoxicity);GO:0002377(immunoglobulin production);GO:0003823(antigen binding);GO:0004896(cytokine receptor activity);GO:0004917(interleukin-7 receptor activity);GO:0005515(protein binding);GO:0005576(extracellular region);GO:0005886(plasma membrane);GO:0006955(immune resp…	04060(Cytokine-cytokine receptor interaction);04068(FoxO signaling pathway);04151(PI3K-Akt signaling pathway);04630(Jak-STAT signaling pathway);04640(Hematopoietic cell lineage);05200(Pathways in cancer);05340(Primary immunodeficiency)	yes	T cells
ENSG00000271503	CCL5	3.5389	0	0	0.611	0.053	C-C motif chemokine ligand 5 [Source:HGNC Symbol;Acc:HGNC:10632]	GO:0000165(MAPK cascade);GO:0002407(dendritic cell chemotaxis);GO:0002548(monocyte chemotaxis);GO:0002676(regulation of chronic inflammatory response);GO:0004435(phosphatidylinositol phospholipase C activity);GO:0004672(protein kinase activity);GO:0005125(cytokine activity);GO:0005515(protein binding);GO:0005576(extracellular region);GO:0005615(extracellular space);GO:0005623(cell);GO:0005737(cyt…	04060(Cytokine-cytokine receptor interaction);04062(Chemokine signaling pathway);04620(Toll-like receptor signaling pathway);04621(NOD-like receptor signaling pathway);04623(Cytosolic DNA-sensing pathway);04668(TNF signaling pathway);05020(Prion diseases);05120(Epithelial cell signaling in Helicobacter pylori infection);05142(Chagas disease (American trypanosomiasis));05163(Human cytomegalovirus …	yes	T cells
ENSG00000110848	CD69	3.12558	0	0	0.722	0.074	CD69 molecule [Source:HGNC Symbol;Acc:HGNC:1694]	GO:0004888(transmembrane signaling receptor activity);GO:0005509(calcium ion binding);GO:0005515(protein binding);GO:0005887(integral component of plasma membrane);GO:0009897(external side of plasma membrane);GO:0009986(cell surface);GO:0016020(membrane);GO:0016021(integral component of membrane);GO:0030246(carbohydrate binding);GO:0032991(protein-containing complex);GO:0035690(cellular response …	NA	yes	T cells
ENSG00000121966	CXCR4	2.96595	0	0	0.901	0.262	C-X-C motif chemokine receptor 4 [Source:HGNC Symbol;Acc:HGNC:2561]	GO:0000187(activation of MAPK activity);GO:0001618(virus receptor activity);GO:0001666(response to hypoxia);GO:0001764(neuron migration);GO:0002064(epithelial cell development);GO:0002407(dendritic cell chemotaxis);GO:0003779(actin binding);GO:0004930(G protein-coupled receptor activity);GO:0004950(chemokine receptor activity);GO:0005515(protein binding);GO:0005634(nucleus);GO:0005737(cytoplasm);…	04020(Calcium signaling pathway);04060(Cytokine-cytokine receptor interaction);04062(Chemokine signaling pathway);04144(Endocytosis);04360(Axon guidance);04670(Leukocyte transendothelial migration);04672(Intestinal immune network for IgA production);04810(Regulation of actin cytoskeleton);05163(Human cytomegalovirus infection);05170(Human immunodeficiency virus 1 infection);05200(Pathways in canc…	yes	T cells
ENSG00000008517	IL32	2.71241	0	0	0.729	0.169	interleukin 32 [Source:HGNC Symbol;Acc:HGNC:16830]	GO:0005125(cytokine activity);GO:0005515(protein binding);GO:0005576(extracellular region);GO:0005615(extracellular space);GO:0005829(cytosol);GO:0006952(defense response);GO:0006955(immune response);GO:0007155(cell adhesion);GO:0010469(regulation of signaling receptor activity);GO:0016020(membrane);GO:0019221(cytokine-mediated signaling pathway)	04060(Cytokine-cytokine receptor interaction)	yes	T cells
ENSG00000116824	CD2	2.45526	0	0	0.591	0.021	CD2 molecule [Source:HGNC Symbol;Acc:HGNC:1639]	GO:0001766(membrane raft polarization);GO:0005102(signaling receptor binding);GO:0005515(protein binding);GO:0005576(extracellular region);GO:0005886(plasma membrane);GO:0005887(integral component of plasma membrane);GO:0005911(cell-cell junction);GO:0006915(apoptotic process);GO:0007155(cell adhesion);GO:0007166(cell surface receptor signaling pathway);GO:0009897(external side of plasma membrane…	04514(Cell adhesion molecules (CAMs));04640(Hematopoietic cell lineage)	yes	T cells
ENSG00000198851	CD3E	2.28499	0	0	0.579	0.021	CD3e molecule [Source:HGNC Symbol;Acc:HGNC:1674]	GO:0001772(immunological synapse);GO:0001954(positive regulation of cell-matrix adhesion);GO:0002250(adaptive immune response);GO:0002376(immune system process);GO:0002669(positive regulation of T cell anergy);GO:0004888(transmembrane signaling receptor activity);GO:0005515(protein binding);GO:0005886(plasma membrane);GO:0005887(integral component of plasma membrane);GO:0005911(cell-cell junction…	04640(Hematopoietic cell lineage);04658(Th1 and Th2 cell differentiation);04659(Th17 cell differentiation);04660(T cell receptor signaling pathway);05142(Chagas disease (American trypanosomiasis));05162(Measles);05166(Human T-cell leukemia virus 1 infection);05169(Epstein-Barr virus infection);05170(Human immunodeficiency virus 1 infection);05340(Primary immunodeficiency)	yes	T cells
ENSG00000145649	GZMA	2.26023	0	0	0.415	0.015	granzyme A [Source:HGNC Symbol;Acc:HGNC:4708]	GO:0001772(immunological synapse);GO:0004252(serine-type endopeptidase activity);GO:0005515(protein binding);GO:0005576(extracellular region);GO:0005634(nucleus);GO:0006508(proteolysis);GO:0006915(apoptotic process);GO:0006955(immune response);GO:0008233(peptidase activity);GO:0008236(serine-type peptidase activity);GO:0009617(response to bacterium);GO:0016787(hydrolase activity);GO:0019835(cytol…	04080(Neuroactive ligand-receptor interaction)	yes	T cells
ENSG00000167286	CD3D	2.25474	0	0	0.543	0.019	CD3d molecule [Source:HGNC Symbol;Acc:HGNC:1673]	GO:0002250(adaptive immune response);GO:0002376(immune system process);GO:0003713(transcription coactivator activity);GO:0004888(transmembrane signaling receptor activity);GO:0005737(cytoplasm);GO:0005886(plasma membrane);GO:0007166(cell surface receptor signaling pathway);GO:0009897(external side of plasma membrane);GO:0016020(membrane);GO:0016021(integral component of membrane);GO:0030217(T cel…	04640(Hematopoietic cell lineage);04658(Th1 and Th2 cell differentiation);04659(Th17 cell differentiation);04660(T cell receptor signaling pathway);05142(Chagas disease (American trypanosomiasis));05162(Measles);05166(Human T-cell leukemia virus 1 infection);05169(Epstein-Barr virus infection);05170(Human immunodeficiency virus 1 infection);05340(Primary immunodeficiency)	yes	T cells
ENSG00000111796	KLRB1	2.23434	0	0	0.348	0.012	killer cell lectin like receptor B1 [Source:HGNC Symbol;Acc:HGNC:6373]	GO:0004888(transmembrane signaling receptor activity);GO:0005515(protein binding);GO:0005886(plasma membrane);GO:0007166(cell surface receptor signaling pathway);GO:0016020(membrane);GO:0016021(integral component of membrane);GO:0030246(carbohydrate binding);GO:0050776(regulation of immune response)	05144(Malaria)	yes	T cells
ENSG00000143546	S100A8	4.28309	0	0	0.673	0.119	S100 calcium binding protein A8 [Source:HGNC Symbol;Acc:HGNC:10498]	GO:0001816(cytokine production);GO:0002224(toll-like receptor signaling pathway);GO:0002376(immune system process);GO:0002523(leukocyte migration involved in inflammatory response);GO:0002526(acute inflammatory response);GO:0002544(chronic inflammatory response);GO:0002793(positive regulation of peptide secretion);GO:0005509(calcium ion binding);GO:0005515(protein binding);GO:0005576(extracellula…	04657(IL-17 signaling pathway)	yes	Macrophages
ENSG00000163220	S100A9	4.23881	0	0	0.856	0.251	S100 calcium binding protein A9 [Source:HGNC Symbol;Acc:HGNC:10499]	GO:0001816(cytokine production);GO:0002224(toll-like receptor signaling pathway);GO:0002376(immune system process);GO:0002523(leukocyte migration involved in inflammatory response);GO:0005509(calcium ion binding);GO:0005515(protein binding);GO:0005576(extracellular region);GO:0005615(extracellular space);GO:0005634(nucleus);GO:0005654(nucleoplasm);GO:0005737(cytoplasm);GO:0005829(cytosol);GO:0005…	04657(IL-17 signaling pathway)	yes	Macrophages
ENSG00000124882	EREG	3.05192	0	0	0.56	0.089	epiregulin [Source:HGNC Symbol;Acc:HGNC:3443]	GO:0000165(MAPK cascade);GO:0001525(angiogenesis);GO:0001550(ovarian cumulus expansion);GO:0001556(oocyte maturation);GO:0001819(positive regulation of cytokine production);GO:0005154(epidermal growth factor receptor binding);GO:0005515(protein binding);GO:0005576(extracellular region);GO:0005615(extracellular space);GO:0005886(plasma membrane);GO:0005887(integral component of plasma membrane);GO…	04010(MAPK signaling pathway);04012(ErbB signaling pathway);04151(PI3K-Akt signaling pathway);05210(Colorectal cancer)	yes	Macrophages
ENSG00000090382	LYZ	2.6896	0	0	0.797	0.185	lysozyme [Source:HGNC Symbol;Acc:HGNC:6740]	GO:0001895(retina homeostasis);GO:0003796(lysozyme activity);GO:0003824(catalytic activity);GO:0005576(extracellular region);GO:0005615(extracellular space);GO:0006954(inflammatory response);GO:0008152(metabolic process);GO:0016787(hydrolase activity);GO:0016798(hydrolase activity, acting on glycosyl bonds);GO:0019730(antimicrobial humoral response);GO:0019835(cytolysis);GO:0031640(killing of cel…	04970(Salivary secretion)	yes	Macrophages
ENSG00000169429	CXCL8	2.55086	0	0	0.665	0.263	C-X-C motif chemokine ligand 8 [Source:HGNC Symbol;Acc:HGNC:6025]	GO:0001525(angiogenesis);GO:0002237(response to molecule of bacterial origin);GO:0005125(cytokine activity);GO:0005153(interleukin-8 receptor binding);GO:0005515(protein binding);GO:0005576(extracellular region);GO:0005615(extracellular space);GO:0006935(chemotaxis);GO:0006952(defense response);GO:0006954(inflammatory response);GO:0006955(immune response);GO:0007050(cell cycle arrest);GO:0007165(…	04060(Cytokine-cytokine receptor interaction);04062(Chemokine signaling pathway);04064(NF-kappa B signaling pathway);04072(Phospholipase D signaling pathway);04218(Cellular senescence);04620(Toll-like receptor signaling pathway);04621(NOD-like receptor signaling pathway);04622(RIG-I-like receptor signaling pathway);04657(IL-17 signaling pathway);04932(Non-alcoholic fatty liver disease (NAFLD));04…	yes	Macrophages
ENSG00000115009	CCL20	2.51663	0	0	0.481	0.105	C-C motif chemokine ligand 20 [Source:HGNC Symbol;Acc:HGNC:10619]	GO:0002548(monocyte chemotaxis);GO:0005125(cytokine activity);GO:0005515(protein binding);GO:0005576(extracellular region);GO:0005615(extracellular space);GO:0006935(chemotaxis);GO:0006954(inflammatory response);GO:0006955(immune response);GO:0007165(signal transduction);GO:0007186(G protein-coupled receptor signaling pathway);GO:0007267(cell-cell signaling);GO:0008009(chemokine activity);GO:0010…	04060(Cytokine-cytokine receptor interaction);04062(Chemokine signaling pathway);04657(IL-17 signaling pathway);04668(TNF signaling pathway);05323(Rheumatoid arthritis)	yes	Macrophages
ENSG00000163221	S100A12	2.44174	0	0	0.293	0.017	S100 calcium binding protein A12 [Source:HGNC Symbol;Acc:HGNC:10489]	GO:0002376(immune system process);GO:0002548(monocyte chemotaxis);GO:0005507(copper ion binding);GO:0005509(calcium ion binding);GO:0005515(protein binding);GO:0005576(extracellular region);GO:0005634(nucleus);GO:0005737(cytoplasm);GO:0005829(cytosol);GO:0005856(cytoskeleton);GO:0005886(plasma membrane);GO:0006805(xenobiotic metabolic process);GO:0006954(inflammatory response);GO:0008270(zinc ion…	NA	yes	Macrophages
ENSG00000011600	TYROBP	2.41206	0	0	0.972	0.264	TYRO protein tyrosine kinase binding protein [Source:HGNC Symbol;Acc:HGNC:12449]	GO:0002274(myeloid leukocyte activation);GO:0002281(macrophage activation involved in immune response);GO:0002282(microglial cell activation involved in immune response);GO:0002283(neutrophil activation involved in immune response);GO:0005102(signaling receptor binding);GO:0005515(protein binding);GO:0005623(cell);GO:0005886(plasma membrane);GO:0005887(integral component of plasma membrane);GO:00…	04380(Osteoclast differentiation);04650(Natural killer cell mediated cytotoxicity)	yes	Macrophages
ENSG00000118785	SPP1	2.40299	0	0	0.504	0.29	secreted phosphoprotein 1 [Source:HGNC Symbol;Acc:HGNC:11255]	GO:0001503(ossification);GO:0001649(osteoblast differentiation);GO:0005125(cytokine activity);GO:0005515(protein binding);GO:0005576(extracellular region);GO:0005615(extracellular space);GO:0005788(endoplasmic reticulum lumen);GO:0005794(Golgi apparatus);GO:0006710(androgen catabolic process);GO:0006954(inflammatory response);GO:0007155(cell adhesion);GO:0007566(embryo implantation);GO:0010033(re…	04151(PI3K-Akt signaling pathway);04371(Apelin signaling pathway);04510(Focal adhesion);04512(ECM-receptor interaction);04620(Toll-like receptor signaling pathway);05165(Human papillomavirus infection)	yes	Macrophages
ENSG00000125538	IL1B	2.37118	0	0	0.595	0.162	interleukin 1 beta [Source:HGNC Symbol;Acc:HGNC:5992]	GO:0000165(MAPK cascade);GO:0000187(activation of MAPK activity);GO:0001660(fever generation);GO:0001934(positive regulation of protein phosphorylation);GO:0002711(positive regulation of T cell mediated immunity);GO:0005125(cytokine activity);GO:0005149(interleukin-1 receptor binding);GO:0005178(integrin binding);GO:0005515(protein binding);GO:0005576(extracellular region);GO:0005615(extracellula…	01523(Antifolate resistance);04010(MAPK signaling pathway);04060(Cytokine-cytokine receptor interaction);04064(NF-kappa B signaling pathway);04217(Necroptosis);04380(Osteoclast differentiation);04620(Toll-like receptor signaling pathway);04621(NOD-like receptor signaling pathway);04623(Cytosolic DNA-sensing pathway);04625(C-type lectin receptor signaling pathway);04640(Hematopoietic cell lineage)…	yes	Macrophages
ENSG00000197253	TPSB2	5.60219	6.1233e-297	2.6596e-292	0.478	0.006	tryptase beta 2 (gene/pseudogene) [Source:HGNC Symbol;Acc:HGNC:14120]	GO:0004252(serine-type endopeptidase activity);GO:0005515(protein binding);GO:0005576(extracellular region);GO:0005615(extracellular space);GO:0006508(proteolysis);GO:0008233(peptidase activity);GO:0008236(serine-type peptidase activity);GO:0016787(hydrolase activity);GO:0062023(collagen-containing extracellular matrix)	NA	yes	Mast cells
ENSG00000172236	TPSAB1	5.049	4.42874e-273	1.92358e-268	0.47	0.003	tryptase alpha/beta 1 [Source:HGNC Symbol;Acc:HGNC:12019]	GO:0004252(serine-type endopeptidase activity);GO:0005515(protein binding);GO:0005576(extracellular region);GO:0005615(extracellular space);GO:0006508(proteolysis);GO:0006952(defense response);GO:0008233(peptidase activity);GO:0008236(serine-type peptidase activity);GO:0016787(hydrolase activity);GO:0022617(extracellular matrix disassembly);GO:0042802(identical protein binding);GO:0062023(collage…	NA	yes	Mast cells
ENSG00000163751	CPA3	4.0134	9.16721e-272	3.98169e-267	0.47	0.002	carboxypeptidase A3 [Source:HGNC Symbol;Acc:HGNC:2298]	GO:0002002(regulation of angiotensin levels in blood);GO:0002003(angiotensin maturation);GO:0004180(carboxypeptidase activity);GO:0004181(metallocarboxypeptidase activity);GO:0005576(extracellular region);GO:0005615(extracellular space);GO:0006508(proteolysis);GO:0008233(peptidase activity);GO:0008237(metallopeptidase activity);GO:0008270(zinc ion binding);GO:0016787(hydrolase activity);GO:003013…	04614(Renin-angiotensin system);04972(Pancreatic secretion);04974(Protein digestion and absorption)	yes	Mast cells
ENSG00000109321	AREG	3.5885	3.43479e-118	1.49187e-113	0.574	0.207	amphiregulin [Source:HGNC Symbol;Acc:HGNC:651]	GO:0000139(Golgi membrane);GO:0000165(MAPK cascade);GO:0005125(cytokine activity);GO:0005154(epidermal growth factor receptor binding);GO:0005515(protein binding);GO:0005576(extracellular region);GO:0005615(extracellular space);GO:0005634(nucleus);GO:0005737(cytoplasm);GO:0005789(endoplasmic reticulum membrane);GO:0006888(endoplasmic reticulum to Golgi vesicle-mediated transport);GO:0007165(signa…	04010(MAPK signaling pathway);04012(ErbB signaling pathway);04151(PI3K-Akt signaling pathway);04390(Hippo signaling pathway);05210(Colorectal cancer)	yes	Mast cells
ENSG00000164120	HPGD	2.65099	1.4741e-139	6.4026e-135	0.426	0.052	15-hydroxyprostaglandin dehydrogenase [Source:HGNC Symbol;Acc:HGNC:5154]	GO:0001822(kidney development);GO:0003824(catalytic activity);GO:0004957(prostaglandin E receptor activity);GO:0005615(extracellular space);GO:0005654(nucleoplasm);GO:0005737(cytoplasm);GO:0005829(cytosol);GO:0006629(lipid metabolic process);GO:0006631(fatty acid metabolic process);GO:0006693(prostaglandin metabolic process);GO:0007179(transforming growth factor beta receptor signaling pathway);G…	05202(Transcriptional misregulation in cancer)	yes	Mast cells
ENSG00000149534	MS4A2	2.55655	9.96719e-230	4.32915e-225	0.414	0.001	membrane spanning 4-domains A2 [Source:HGNC Symbol;Acc:HGNC:7316]	GO:0005886(plasma membrane);GO:0005887(integral component of plasma membrane);GO:0006954(inflammatory response);GO:0006955(immune response);GO:0007165(signal transduction);GO:0007166(cell surface receptor signaling pathway);GO:0009897(external side of plasma membrane);GO:0016020(membrane);GO:0016021(integral component of membrane);GO:0019863(IgE binding);GO:0032998(Fc-epsilon receptor I complex);…	04071(Sphingolipid signaling pathway);04072(Phospholipase D signaling pathway);04664(Fc epsilon RI signaling pathway);05310(Asthma)	yes	Mast cells
ENSG00000179348	GATA2	2.53724	1.75962e-245	7.64273e-241	0.442	0.047	GATA binding protein 2 [Source:HGNC Symbol;Acc:HGNC:4171]	GO:0000122(negative regulation of transcription by RNA polymerase II);GO:0000978(RNA polymerase II proximal promoter sequence-specific DNA binding);GO:0000980(RNA polymerase II distal enhancer sequence-specific DNA binding);GO:0000981(DNA-binding transcription factor activity, RNA polymerase II-specific);GO:0001158(enhancer sequence-specific DNA binding);GO:0001228(DNA-binding transcription activ…	NA	yes	Mast cells
ENSG00000163106	HPGDS	2.3853	3.16561e-232	1.37495e-227	0.41	0.03	hematopoietic prostaglandin D synthase [Source:HGNC Symbol;Acc:HGNC:17890]	GO:0000287(magnesium ion binding);GO:0001516(prostaglandin biosynthetic process);GO:0004364(glutathione transferase activity);GO:0004667(prostaglandin-D synthase activity);GO:0005509(calcium ion binding);GO:0005515(protein binding);GO:0005737(cytoplasm);GO:0005829(cytosol);GO:0006629(lipid metabolic process);GO:0006631(fatty acid metabolic process);GO:0006633(fatty acid biosynthetic process);GO:0…	00480(Glutathione metabolism);00590(Arachidonic acid metabolism);00980(Metabolism of xenobiotics by cytochrome P450);00982(Drug metabolism - cytochrome P450);05204(Chemical carcinogenesis)	yes	Mast cells
ENSG00000263961	RHEX	2.20461	1.30011e-210	5.64689e-206	0.382	0.001	regulator of hemoglobinization and erythroid cell expansion [Source:HGNC Symbol;Acc:HGNC:25341]	GO:0005128(erythropoietin receptor binding);GO:0005515(protein binding);GO:0005886(plasma membrane);GO:0016020(membrane);GO:0016021(integral component of membrane);GO:0030154(cell differentiation);GO:0036018(cellular response to erythropoietin);GO:0038162(erythropoietin-mediated signaling pathway);GO:0043249(erythrocyte maturation);GO:0045648(positive regulation of erythrocyte differentiation)	NA	yes	Mast cells
ENSG00000157404	KIT	2.13394	1.49355e-191	6.48707e-187	0.402	0.009	KIT proto-oncogene receptor tyrosine kinase [Source:HGNC Symbol;Acc:HGNC:6342]	GO:0000165(MAPK cascade);GO:0000166(nucleotide binding);GO:0000187(activation of MAPK activity);GO:0001541(ovarian follicle development);GO:0001669(acrosomal vesicle);GO:0002020(protease binding);GO:0002244(hematopoietic progenitor cell differentiation);GO:0002318(myeloid progenitor cell differentiation);GO:0002320(lymphoid progenitor cell differentiation);GO:0002327(immature B cell differentiati…	04010(MAPK signaling pathway);04014(Ras signaling pathway);04015(Rap1 signaling pathway);04072(Phospholipase D signaling pathway);04151(PI3K-Akt signaling pathway);04640(Hematopoietic cell lineage);04916(Melanogenesis);05200(Pathways in cancer);05221(Acute myeloid leukemia);05224(Breast cancer);05230(Central carbon metabolism in cancer)	yes	Mast cells
ENSG00000204287	HLA-DRA	3.07169	0	0	0.954	0.399	major histocompatibility complex, class II, DR alpha [Source:HGNC Symbol;Acc:HGNC:4947]	GO:0000139(Golgi membrane);GO:0002376(immune system process);GO:0002503(peptide antigen assembly with MHC class II protein complex);GO:0002504(antigen processing and presentation of peptide or polysaccharide antigen via MHC class II);GO:0002506(polysaccharide assembly with MHC class II protein complex);GO:0005515(protein binding);GO:0005764(lysosome);GO:0005765(lysosomal membrane);GO:0005768(endo…	04145(Phagosome);04514(Cell adhesion molecules (CAMs));04612(Antigen processing and presentation);04640(Hematopoietic cell lineage);04658(Th1 and Th2 cell differentiation);04659(Th17 cell differentiation);04672(Intestinal immune network for IgA production);04940(Type I diabetes mellitus);05140(Leishmaniasis);05145(Toxoplasmosis);05150(Staphylococcus aureus infection);05152(Tuberculosis);05164(Inf…	yes	Monocyte
ENSG00000173369	C1QB	3.03847	0	0	0.854	0.174	complement C1q B chain [Source:HGNC Symbol;Acc:HGNC:1242]	GO:0002376(immune system process);GO:0005515(protein binding);GO:0005576(extracellular region);GO:0005581(collagen trimer);GO:0005602(complement component C1 complex);GO:0005623(cell);GO:0006956(complement activation);GO:0006958(complement activation, classical pathway);GO:0030449(regulation of complement activation);GO:0042803(protein homodimerization activity);GO:0045087(innate immune response)…	04610(Complement and coagulation cascades);05020(Prion diseases);05133(Pertussis);05142(Chagas disease (American trypanosomiasis));05150(Staphylococcus aureus infection);05322(Systemic lupus erythematosus)	yes	Monocyte
ENSG00000019582	CD74	3.01483	0	0	0.969	0.499	CD74 molecule [Source:HGNC Symbol;Acc:HGNC:1697]	GO:0000139(Golgi membrane);GO:0000187(activation of MAPK activity);GO:0001516(prostaglandin biosynthetic process);GO:0001540(amyloid-beta binding);GO:0001934(positive regulation of protein phosphorylation);GO:0001961(positive regulation of cytokine-mediated signaling pathway);GO:0002250(adaptive immune response);GO:0002376(immune system process);GO:0002606(positive regulation of dendritic cell an…	04612(Antigen processing and presentation);05152(Tuberculosis);05168(Herpes simplex virus 1 infection)	yes	Monocyte
ENSG00000173372	C1QA	2.76655	0	0	0.859	0.177	complement C1q A chain [Source:HGNC Symbol;Acc:HGNC:1241]	GO:0001540(amyloid-beta binding);GO:0002376(immune system process);GO:0005515(protein binding);GO:0005576(extracellular region);GO:0005581(collagen trimer);GO:0005602(complement component C1 complex);GO:0005623(cell);GO:0006956(complement activation);GO:0006958(complement activation, classical pathway);GO:0007267(cell-cell signaling);GO:0007568(aging);GO:0010039(response to iron ion);GO:0016322(n…	04610(Complement and coagulation cascades);05020(Prion diseases);05133(Pertussis);05142(Chagas disease (American trypanosomiasis));05150(Staphylococcus aureus infection);05322(Systemic lupus erythematosus)	yes	Monocyte
ENSG00000159189	C1QC	2.75957	0	0	0.819	0.107	complement C1q C chain [Source:HGNC Symbol;Acc:HGNC:1245]	GO:0002376(immune system process);GO:0005515(protein binding);GO:0005576(extracellular region);GO:0005581(collagen trimer);GO:0005615(extracellular space);GO:0005623(cell);GO:0006955(immune response);GO:0006956(complement activation);GO:0006958(complement activation, classical pathway);GO:0030449(regulation of complement activation);GO:0030853(negative regulation of granulocyte differentiation);G…	04610(Complement and coagulation cascades);05020(Prion diseases);05133(Pertussis);05142(Chagas disease (American trypanosomiasis));05150(Staphylococcus aureus infection);05322(Systemic lupus erythematosus)	yes	Monocyte
ENSG00000231389	HLA-DPA1	2.68596	0	0	0.9	0.295	major histocompatibility complex, class II, DP alpha 1 [Source:HGNC Symbol;Acc:HGNC:4938]	GO:0000139(Golgi membrane);GO:0002376(immune system process);GO:0002504(antigen processing and presentation of peptide or polysaccharide antigen via MHC class II);GO:0005764(lysosome);GO:0005765(lysosomal membrane);GO:0005768(endosome);GO:0005783(endoplasmic reticulum);GO:0005789(endoplasmic reticulum membrane);GO:0005794(Golgi apparatus);GO:0005886(plasma membrane);GO:0005887(integral component …	04145(Phagosome);04514(Cell adhesion molecules (CAMs));04612(Antigen processing and presentation);04640(Hematopoietic cell lineage);04658(Th1 and Th2 cell differentiation);04659(Th17 cell differentiation);04672(Intestinal immune network for IgA production);04940(Type I diabetes mellitus);05140(Leishmaniasis);05145(Toxoplasmosis);05150(Staphylococcus aureus infection);05152(Tuberculosis);05164(Inf…	yes	Monocyte
ENSG00000198502	HLA-DRB5	2.66691	0	0	0.846	0.222	major histocompatibility complex, class II, DR beta 5 [Source:HGNC Symbol;Acc:HGNC:4953]	GO:0000139(Golgi membrane);GO:0002376(immune system process);GO:0002504(antigen processing and presentation of peptide or polysaccharide antigen via MHC class II);GO:0005764(lysosome);GO:0005765(lysosomal membrane);GO:0005768(endosome);GO:0005783(endoplasmic reticulum);GO:0005789(endoplasmic reticulum membrane);GO:0005794(Golgi apparatus);GO:0005886(plasma membrane);GO:0006955(immune response);GO…	04145(Phagosome);04514(Cell adhesion molecules (CAMs));04612(Antigen processing and presentation);04640(Hematopoietic cell lineage);04658(Th1 and Th2 cell differentiation);04659(Th17 cell differentiation);04672(Intestinal immune network for IgA production);04940(Type I diabetes mellitus);05140(Leishmaniasis);05145(Toxoplasmosis);05150(Staphylococcus aureus infection);05152(Tuberculosis);05164(Inf…	yes	Monocyte
ENSG00000196126	HLA-DRB1	2.62211	0	0	0.917	0.32	major histocompatibility complex, class II, DR beta 1 [Source:HGNC Symbol;Acc:HGNC:4948]	GO:0000139(Golgi membrane);GO:0001618(virus receptor activity);GO:0002376(immune system process);GO:0002381(immunoglobulin production involved in immunoglobulin mediated immune response);GO:0002437(inflammatory response to antigenic stimulus);GO:0002455(humoral immune response mediated by circulating immunoglobulin);GO:0002504(antigen processing and presentation of peptide or polysaccharide antig…	04145(Phagosome);04514(Cell adhesion molecules (CAMs));04612(Antigen processing and presentation);04640(Hematopoietic cell lineage);04658(Th1 and Th2 cell differentiation);04659(Th17 cell differentiation);04672(Intestinal immune network for IgA production);04940(Type I diabetes mellitus);05140(Leishmaniasis);05145(Toxoplasmosis);05150(Staphylococcus aureus infection);05152(Tuberculosis);05164(Inf…	yes	Monocyte
ENSG00000223865	HLA-DPB1	2.61239	0	0	0.876	0.306	major histocompatibility complex, class II, DP beta 1 [Source:HGNC Symbol;Acc:HGNC:4940]	GO:0000139(Golgi membrane);GO:0002376(immune system process);GO:0002504(antigen processing and presentation of peptide or polysaccharide antigen via MHC class II);GO:0005764(lysosome);GO:0005765(lysosomal membrane);GO:0005768(endosome);GO:0005783(endoplasmic reticulum);GO:0005789(endoplasmic reticulum membrane);GO:0005794(Golgi apparatus);GO:0005886(plasma membrane);GO:0006955(immune response);GO…	04145(Phagosome);04514(Cell adhesion molecules (CAMs));04612(Antigen processing and presentation);04640(Hematopoietic cell lineage);04658(Th1 and Th2 cell differentiation);04659(Th17 cell differentiation);04672(Intestinal immune network for IgA production);04940(Type I diabetes mellitus);05140(Leishmaniasis);05145(Toxoplasmosis);05150(Staphylococcus aureus infection);05152(Tuberculosis);05164(Inf…	yes	Monocyte
ENSG00000196735	HLA-DQA1	2.28069	0	0	0.689	0.1	major histocompatibility complex, class II, DQ alpha 1 [Source:HGNC Symbol;Acc:HGNC:4942]	GO:0000139(Golgi membrane);GO:0002376(immune system process);GO:0002504(antigen processing and presentation of peptide or polysaccharide antigen via MHC class II);GO:0005515(protein binding);GO:0005764(lysosome);GO:0005765(lysosomal membrane);GO:0005768(endosome);GO:0005783(endoplasmic reticulum);GO:0005789(endoplasmic reticulum membrane);GO:0005794(Golgi apparatus);GO:0005886(plasma membrane);GO…	04145(Phagosome);04514(Cell adhesion molecules (CAMs));04612(Antigen processing and presentation);04640(Hematopoietic cell lineage);04658(Th1 and Th2 cell differentiation);04659(Th17 cell differentiation);04672(Intestinal immune network for IgA production);04940(Type I diabetes mellitus);05140(Leishmaniasis);05145(Toxoplasmosis);05150(Staphylococcus aureus infection);05152(Tuberculosis);05164(Inf…	yes	Monocyte
ENSG00000211592	IGKC	9.46281	0	0	0.813	0.229	immunoglobulin kappa constant [Source:HGNC Symbol;Acc:HGNC:5716]	NA	NA	yes	Plasmocyte
ENSG00000211677	IGLC2	9.27559	0	0	0.586	0.1	immunoglobulin lambda constant 2 [Source:HGNC Symbol;Acc:HGNC:5856]	GO:0002250(adaptive immune response);GO:0002376(immune system process);GO:0003823(antigen binding);GO:0005576(extracellular region);GO:0005615(extracellular space);GO:0005886(plasma membrane);GO:0006898(receptor-mediated endocytosis);GO:0006910(phagocytosis, recognition);GO:0006911(phagocytosis, engulfment);GO:0006956(complement activation);GO:0006958(complement activation, classical pathway);GO:…	NA	yes	Plasmocyte
ENSG00000211679	IGLC3	8.27462	0	0	0.409	0.041	immunoglobulin lambda constant 3 (Kern-Oz+ marker) [Source:HGNC Symbol;Acc:HGNC:5857]	GO:0002250(adaptive immune response);GO:0002376(immune system process);GO:0003823(antigen binding);GO:0005576(extracellular region);GO:0005615(extracellular space);GO:0005886(plasma membrane);GO:0006898(receptor-mediated endocytosis);GO:0006910(phagocytosis, recognition);GO:0006911(phagocytosis, engulfment);GO:0006956(complement activation);GO:0006958(complement activation, classical pathway);GO:…	NA	yes	Plasmocyte
ENSG00000211895	IGHA1	7.64628	0	0	0.545	0.081	immunoglobulin heavy constant alpha 1 [Source:HGNC Symbol;Acc:HGNC:5478]	GO:0001895(retina homeostasis);GO:0002250(adaptive immune response);GO:0002376(immune system process);GO:0003094(glomerular filtration);GO:0003823(antigen binding);GO:0005576(extracellular region);GO:0005615(extracellular space);GO:0005886(plasma membrane);GO:0006898(receptor-mediated endocytosis);GO:0006910(phagocytosis, recognition);GO:0006911(phagocytosis, engulfment);GO:0006955(immune respons…	NA	yes	Plasmocyte
ENSG00000211896	IGHG1	7.5471	0	0	0.577	0.038	immunoglobulin heavy constant gamma 1 (G1m marker) [Source:HGNC Symbol;Acc:HGNC:5525]	GO:0002250(adaptive immune response);GO:0002376(immune system process);GO:0003823(antigen binding);GO:0005515(protein binding);GO:0005576(extracellular region);GO:0005615(extracellular space);GO:0005886(plasma membrane);GO:0006910(phagocytosis, recognition);GO:0006911(phagocytosis, engulfment);GO:0006956(complement activation);GO:0006958(complement activation, classical pathway);GO:0009897(extern…	NA	yes	Plasmocyte
ENSG00000211892	IGHG4	7.11188	0	0	0.651	0.067	immunoglobulin heavy constant gamma 4 (G4m marker) [Source:HGNC Symbol;Acc:HGNC:5528]	GO:0002250(adaptive immune response);GO:0002376(immune system process);GO:0003823(antigen binding);GO:0005576(extracellular region);GO:0005615(extracellular space);GO:0005886(plasma membrane);GO:0006910(phagocytosis, recognition);GO:0006911(phagocytosis, engulfment);GO:0006956(complement activation);GO:0006958(complement activation, classical pathway);GO:0009897(external side of plasma membrane);…	NA	yes	Plasmocyte
ENSG00000211897	IGHG3	6.24341	0	0	0.493	0.026	immunoglobulin heavy constant gamma 3 (G3m marker) [Source:HGNC Symbol;Acc:HGNC:5527]	GO:0016020(membrane);GO:0016021(integral component of membrane)	NA	yes	Plasmocyte
ENSG00000211899	IGHM	6.0386	4.93695e-203	2.14431e-198	0.33	0.027	immunoglobulin heavy constant mu [Source:HGNC Symbol;Acc:HGNC:5541]	GO:0002250(adaptive immune response);GO:0002376(immune system process);GO:0003697(single-stranded DNA binding);GO:0003823(antigen binding);GO:0005515(protein binding);GO:0005576(extracellular region);GO:0005615(extracellular space);GO:0005886(plasma membrane);GO:0006910(phagocytosis, recognition);GO:0006911(phagocytosis, engulfment);GO:0006958(complement activation, classical pathway);GO:0009897(…	NA	yes	Plasmocyte
ENSG00000132465	JCHAIN	5.97552	0	0	0.711	0.013	joining chain of multimeric IgA and IgM [Source:HGNC Symbol;Acc:HGNC:5713]	GO:0001895(retina homeostasis);GO:0002250(adaptive immune response);GO:0003094(glomerular filtration);GO:0003697(single-stranded DNA binding);GO:0003823(antigen binding);GO:0005576(extracellular region);GO:0005615(extracellular space);GO:0006898(receptor-mediated endocytosis);GO:0006955(immune response);GO:0019731(antibacterial humoral response);GO:0019862(IgA binding);GO:0030674(protein binding,…	NA	yes	Plasmocyte
ENSG00000211893	IGHG2	5.95932	0	0	0.337	0.015	immunoglobulin heavy constant gamma 2 (G2m marker) [Source:HGNC Symbol;Acc:HGNC:5526]	GO:0002250(adaptive immune response);GO:0002376(immune system process);GO:0003823(antigen binding);GO:0005515(protein binding);GO:0005576(extracellular region);GO:0005615(extracellular space);GO:0005886(plasma membrane);GO:0006910(phagocytosis, recognition);GO:0006911(phagocytosis, engulfment);GO:0006956(complement activation);GO:0006958(complement activation, classical pathway);GO:0009897(extern…	NA	yes	Plasmocyte
ENSG00000156738	MS4A1	2.99171	0	0	0.766	0.009	membrane spanning 4-domains A1 [Source:HGNC Symbol;Acc:HGNC:7315]	GO:0002115(store-operated calcium entry);GO:0005154(epidermal growth factor receptor binding);GO:0005515(protein binding);GO:0005615(extracellular space);GO:0005634(nucleus);GO:0005886(plasma membrane);GO:0005887(integral component of plasma membrane);GO:0006959(humoral immune response);GO:0009617(response to bacterium);GO:0009897(external side of plasma membrane);GO:0009986(cell surface);GO:0016…	04640(Hematopoietic cell lineage)	yes	B-cells
ENSG00000211899	IGHM	2.83296	0	0	0.514	0.022	immunoglobulin heavy constant mu [Source:HGNC Symbol;Acc:HGNC:5541]	GO:0002250(adaptive immune response);GO:0002376(immune system process);GO:0003697(single-stranded DNA binding);GO:0003823(antigen binding);GO:0005515(protein binding);GO:0005576(extracellular region);GO:0005615(extracellular space);GO:0005886(plasma membrane);GO:0006910(phagocytosis, recognition);GO:0006911(phagocytosis, engulfment);GO:0006958(complement activation, classical pathway);GO:0009897(…	NA	yes	B-cells
ENSG00000105369	CD79A	2.78235	0	0	0.682	0.007	CD79a molecule [Source:HGNC Symbol;Acc:HGNC:1698]	GO:0002250(adaptive immune response);GO:0002376(immune system process);GO:0004888(transmembrane signaling receptor activity);GO:0005515(protein binding);GO:0005771(multivesicular body);GO:0005886(plasma membrane);GO:0007166(cell surface receptor signaling pathway);GO:0009897(external side of plasma membrane);GO:0016020(membrane);GO:0016021(integral component of membrane);GO:0019815(B cell recepto…	04662(B cell receptor signaling pathway);05340(Primary immunodeficiency)	yes	B-cells
ENSG00000153064	BANK1	2.57263	0	0	0.669	0.011	B cell scaffold protein with ankyrin repeats 1 [Source:HGNC Symbol;Acc:HGNC:18233]	GO:0005102(signaling receptor binding);GO:0009617(response to bacterium);GO:0042113(B cell activation);GO:0043410(positive regulation of MAPK cascade);GO:0045947(negative regulation of translational initiation);GO:0050731(positive regulation of peptidyl-tyrosine phosphorylation);GO:0050869(negative regulation of B cell activation);GO:0051898(negative regulation of protein kinase B signaling);GO:1…	NA	yes	B-cells
ENSG00000104894	CD37	2.19514	0	0	0.85	0.314	CD37 molecule [Source:HGNC Symbol;Acc:HGNC:1666]	GO:0001772(immunological synapse);GO:0005515(protein binding);GO:0005887(integral component of plasma membrane);GO:0007166(cell surface receptor signaling pathway);GO:0016020(membrane);GO:0016021(integral component of membrane);GO:0070062(extracellular exosome)	04640(Hematopoietic cell lineage)	yes	B-cells
ENSG00000227507	LTB	2.1849	0	0	0.7	0.113	lymphotoxin beta [Source:HGNC Symbol;Acc:HGNC:6711]	GO:0005102(signaling receptor binding);GO:0005125(cytokine activity);GO:0005164(tumor necrosis factor receptor binding);GO:0005515(protein binding);GO:0005575(cellular_component);GO:0005615(extracellular space);GO:0005886(plasma membrane);GO:0006955(immune response);GO:0007165(signal transduction);GO:0007267(cell-cell signaling);GO:0010467(gene expression);GO:0010469(regulation of signaling recep…	04060(Cytokine-cytokine receptor interaction);04064(NF-kappa B signaling pathway);05323(Rheumatoid arthritis)	yes	B-cells
ENSG00000196735	HLA-DQA1	2.07353	0	0	0.745	0.164	major histocompatibility complex, class II, DQ alpha 1 [Source:HGNC Symbol;Acc:HGNC:4942]	GO:0000139(Golgi membrane);GO:0002376(immune system process);GO:0002504(antigen processing and presentation of peptide or polysaccharide antigen via MHC class II);GO:0005515(protein binding);GO:0005764(lysosome);GO:0005765(lysosomal membrane);GO:0005768(endosome);GO:0005783(endoplasmic reticulum);GO:0005789(endoplasmic reticulum membrane);GO:0005794(Golgi apparatus);GO:0005886(plasma membrane);GO…	04145(Phagosome);04514(Cell adhesion molecules (CAMs));04612(Antigen processing and presentation);04640(Hematopoietic cell lineage);04658(Th1 and Th2 cell differentiation);04659(Th17 cell differentiation);04672(Intestinal immune network for IgA production);04940(Type I diabetes mellitus);05140(Leishmaniasis);05145(Toxoplasmosis);05150(Staphylococcus aureus infection);05152(Tuberculosis);05164(Inf…	yes	B-cells
ENSG00000116191	RALGPS2	1.99833	0	0	0.525	0.043	Ral GEF with PH domain and SH3 binding motif 2 [Source:HGNC Symbol;Acc:HGNC:30279]	GO:0005085(guanyl-nucleotide exchange factor activity);GO:0005622(intracellular);GO:0005737(cytoplasm);GO:0005886(plasma membrane);GO:0007264(small GTPase mediated signal transduction);GO:0016020(membrane);GO:0032485(regulation of Ral protein signal transduction)	NA	yes	B-cells
ENSG00000023445	BIRC3	1.98651	0	0	0.716	0.237	baculoviral IAP repeat containing 3 [Source:HGNC Symbol;Acc:HGNC:591]	GO:0002756(MyD88-independent toll-like receptor signaling pathway);GO:0004842(ubiquitin-protein transferase activity);GO:0005515(protein binding);GO:0005634(nucleus);GO:0005654(nucleoplasm);GO:0005737(cytoplasm);GO:0005829(cytosol);GO:0006915(apoptotic process);GO:0007166(cell surface receptor signaling pathway);GO:0007249(I-kappaB kinase/NF-kappaB signaling);GO:0007283(spermatogenesis);GO:001080…	01524(Platinum drug resistance);04064(NF-kappa B signaling pathway);04120(Ubiquitin mediated proteolysis);04210(Apoptosis);04215(Apoptosis - multiple species);04217(Necroptosis);04510(Focal adhesion);04621(NOD-like receptor signaling pathway);04668(TNF signaling pathway);05145(Toxoplasmosis);05168(Herpes simplex virus 1 infection);05200(Pathways in cancer);05202(Transcriptional misregulation in c…	yes	B-cells
ENSG00000159958	TNFRSF13C	1.84866	0	0	0.464	0.007	TNF receptor superfamily member 13C [Source:HGNC Symbol;Acc:HGNC:17755]	GO:0001782(B cell homeostasis);GO:0002250(adaptive immune response);GO:0002376(immune system process);GO:0002636(positive regulation of germinal center formation);GO:0005886(plasma membrane);GO:0009897(external side of plasma membrane);GO:0016020(membrane);GO:0016021(integral component of membrane);GO:0030890(positive regulation of B cell proliferation);GO:0031295(T cell costimulation);GO:0031296…	04060(Cytokine-cytokine receptor interaction);04064(NF-kappa B signaling pathway);04672(Intestinal immune network for IgA production);05166(Human T-cell leukemia virus 1 infection);05340(Primary immunodeficiency)	yes	B-cells
