# Supplementary material for: Single-Cell RNA-Seq Analysis Reveals Macrophages Are Involved in the Pathogenesis of Human Sporadic Acute Type A Aortic Dissection
Source: Biomolecules. 2023 Feb 20;13(2):399. doi: 10.3390/biom13020399 (PMC9952989; doi:10.3390/biom13020399)
Supplement: Supplementary file 1 [file biomolecules-13-00399-s001.zip › Table S4.xlsx]

## Sheet: Sheet1
Table S4. Marker gene of macrophage subclusters.
Target_Cluster	GeneID	GeneName	Target_Cluster_mean	Other_Cluster_mean	log2FC	Pvlaue	Qvalue	Description	GO	KEGG	KO_ENTRY	EC
0	ENSG00000101439	CST3	21.4498	16.9165	0.342537	2.26982e-147	9.85873e-143	cystatin C [Source:HGNC Symbol;Acc:HGNC:2475]	GO:0001540(amyloid-beta binding);GO:0001654(eye development);GO:0001666(response to hypoxia);GO:0001775(cell activation);GO:0002020(protease binding);GO:0004866(endopeptidase inhibitor activity);GO:0004869(cysteine-type endopeptidase inhibitor activity);GO:0005515(protein binding);GO:0005576(extracellular region);GO:0005604(basement membrane);GO:0005615(extracellular space);GO:0005737(cytoplasm);…	04970(Salivary secretion)	NA	NA
0	ENSG00000131724	IL13RA1	2.11986	1.67526	0.339583	6.77526e-144	2.94277e-139	interleukin 13 receptor subunit alpha 1 [Source:HGNC Symbol;Acc:HGNC:5974]	GO:0004896(cytokine receptor activity);GO:0005515(protein binding);GO:0005886(plasma membrane);GO:0005898(interleukin-13 receptor complex);GO:0007166(cell surface receptor signaling pathway);GO:0009897(external side of plasma membrane);GO:0016020(membrane);GO:0016021(integral component of membrane);GO:0016515(interleukin-13 receptor activity);GO:0019221(cytokine-mediated signaling pathway);GO:001…	04060(Cytokine-cytokine receptor interaction);04630(Jak-STAT signaling pathway);05200(Pathways in cancer)	K05076	NA
0	ENSG00000070756	PABPC1	10.6304	8.69631	0.289719	7.24173e-141	3.14537e-136	poly(A) binding protein cytoplasmic 1 [Source:HGNC Symbol;Acc:HGNC:8554]	GO:0000184(nuclear-transcribed mRNA catabolic process, nonsense-mediated decay);GO:0000398(mRNA splicing, via spliceosome);GO:0003676(nucleic acid binding);GO:0003723(RNA binding);GO:0003730(mRNA 3'-UTR binding);GO:0005515(protein binding);GO:0005634(nucleus);GO:0005681(spliceosomal complex);GO:0005737(cytoplasm);GO:0005829(cytosol);GO:0005925(focal adhesion);GO:0006378(mRNA polyadenylation);GO:0…	03013(RNA transport);03015(mRNA surveillance pathway);03018(RNA degradation)	K13126	NA
0	ENSG00000170275	CRTAP	1.47124	1.18239	0.315323	1.86466e-137	8.09898e-133	cartilage associated protein [Source:HGNC Symbol;Acc:HGNC:2379]	GO:0005515(protein binding);GO:0005576(extracellular region);GO:0005615(extracellular space);GO:0005783(endoplasmic reticulum);GO:0005788(endoplasmic reticulum lumen);GO:0007283(spermatogenesis);GO:0018400(peptidyl-proline hydroxylation to 3-hydroxy-L-proline);GO:0032991(protein-containing complex);GO:0050821(protein stabilization);GO:0061077(chaperone-mediated protein folding);GO:1901874(negativ…	NA	K19606	NA
0	ENSG00000019582	CD74	16.4259	11.1595	0.557694	8.18687e-134	3.55589e-129	CD74 molecule [Source:HGNC Symbol;Acc:HGNC:1697]	GO:0000139(Golgi membrane);GO:0000187(activation of MAPK activity);GO:0001516(prostaglandin biosynthetic process);GO:0001540(amyloid-beta binding);GO:0001934(positive regulation of protein phosphorylation);GO:0001961(positive regulation of cytokine-mediated signaling pathway);GO:0002250(adaptive immune response);GO:0002376(immune system process);GO:0002606(positive regulation of dendritic cell an…	04612(Antigen processing and presentation);05152(Tuberculosis);05168(Herpes simplex virus 1 infection)	NA	NA
0	ENSG00000198763	MT-ND2	45.5689	34.8986	0.384882	1.01446e-130	4.40622e-126	mitochondrially encoded NADH:ubiquinone oxidoreductase core subunit 2 [Source:HGNC Symbol;Acc:HGNC:7456]	GO:0005739(mitochondrion);GO:0005743(mitochondrial inner membrane);GO:0005747(mitochondrial respiratory chain complex I);GO:0006120(mitochondrial electron transport, NADH to ubiquinone);GO:0008137(NADH dehydrogenase (ubiquinone) activity);GO:0014069(postsynaptic density);GO:0016020(membrane);GO:0016021(integral component of membrane);GO:0016491(oxidoreductase activity);GO:0019901(protein kinase b…	00190(Oxidative phosphorylation);04714(Thermogenesis);04723(Retrograde endocannabinoid signaling);05012(Parkinson disease)	K03879	EC:7.1.1.2
0	ENSG00000124942	AHNAK	6.12282	5.071	0.271926	3.70134e-124	1.60764e-119	AHNAK nucleoprotein [Source:HGNC Symbol;Acc:HGNC:347]	GO:0003723(RNA binding);GO:0005515(protein binding);GO:0005634(nucleus);GO:0005737(cytoplasm);GO:0005765(lysosomal membrane);GO:0005829(cytosol);GO:0005886(plasma membrane);GO:0005925(focal adhesion);GO:0015629(actin cytoskeleton);GO:0016020(membrane);GO:0030315(T-tubule);GO:0031982(vesicle);GO:0042383(sarcolemma);GO:0043034(costamere);GO:0043484(regulation of RNA splicing);GO:0044291(cell-cell c…	NA	NA	NA
0	ENSG00000109046	WSB1	4.72508	3.94412	0.260636	5.50268e-119	2.39003e-114	WD repeat and SOCS box containing 1 [Source:HGNC Symbol;Acc:HGNC:19221]	GO:0000209(protein polyubiquitination);GO:0005515(protein binding);GO:0005622(intracellular);GO:0005829(cytosol);GO:0008150(biological_process);GO:0016567(protein ubiquitination);GO:0035556(intracellular signal transduction);GO:0043687(post-translational protein modification)	NA	K10341	NA
0	ENSG00000152518	ZFP36L2	5.7276	4.42902	0.370944	3.76508e-117	1.63532e-112	ZFP36 ring finger protein like 2 [Source:HGNC Symbol;Acc:HGNC:1108]	GO:0000165(MAPK cascade);GO:0000288(nuclear-transcribed mRNA catabolic process, deadenylation-dependent decay);GO:0000981(DNA-binding transcription factor activity, RNA polymerase II-specific);GO:0003677(DNA binding);GO:0003700(DNA-binding transcription factor activity);GO:0003723(RNA binding);GO:0003730(mRNA 3'-UTR binding);GO:0005515(protein binding);GO:0005634(nucleus);GO:0005737(cytoplasm);GO…	04218(Cellular senescence)	NA	NA
0	ENSG00000153234	NR4A2	5.33644	4.29363	0.313679	3.02048e-115	1.31191e-110	nuclear receptor subfamily 4 group A member 2 [Source:HGNC Symbol;Acc:HGNC:7981]	GO:0000122(negative regulation of transcription by RNA polymerase II);GO:0000977(RNA polymerase II regulatory region sequence-specific DNA binding);GO:0000978(RNA polymerase II proximal promoter sequence-specific DNA binding);GO:0000981(DNA-binding transcription factor activity, RNA polymerase II-specific);GO:0001228(DNA-binding transcription activator activity, RNA polymerase II-specific);GO:000…	04925(Aldosterone synthesis and secretion);04928(Parathyroid hormone synthesis, secretion and action)	K08558	NA
0	ENSG00000146278	PNRC1	6.83531	5.68672	0.26541	4.553e-114	1.97755e-109	proline rich nuclear receptor coactivator 1 [Source:HGNC Symbol;Acc:HGNC:17278]	GO:0005515(protein binding);GO:0005634(nucleus)	NA	K18774	NA
0	ENSG00000245532	NEAT1	74.6254	55.9306	0.41603	1.87336e-110	8.13677e-106	nuclear paraspeckle assembly transcript 1 [Source:HGNC Symbol;Acc:HGNC:30815]	NA	NA	NA	NA
0	ENSG00000125740	FOSB	8.91702	7.09211	0.330348	2.26388e-108	9.83293e-104	FosB proto-oncogene, AP-1 transcription factor subunit [Source:HGNC Symbol;Acc:HGNC:3797]	GO:0000122(negative regulation of transcription by RNA polymerase II);GO:0000978(RNA polymerase II proximal promoter sequence-specific DNA binding);GO:0000981(DNA-binding transcription factor activity, RNA polymerase II-specific);GO:0001228(DNA-binding transcription activator activity, RNA polymerase II-specific);GO:0003677(DNA binding);GO:0003690(double-stranded DNA binding);GO:0003700(DNA-bindi…	04380(Osteoclast differentiation);04657(IL-17 signaling pathway);05030(Cocaine addiction);05031(Amphetamine addiction);05034(Alcoholism)	NA	NA
0	ENSG00000198502	HLA-DRB5	3.1744	2.59781	0.289185	4.64711e-102	2.01842e-97	major histocompatibility complex, class II, DR beta 5 [Source:HGNC Symbol;Acc:HGNC:4953]	GO:0000139(Golgi membrane);GO:0002376(immune system process);GO:0002504(antigen processing and presentation of peptide or polysaccharide antigen via MHC class II);GO:0005764(lysosome);GO:0005765(lysosomal membrane);GO:0005768(endosome);GO:0005783(endoplasmic reticulum);GO:0005789(endoplasmic reticulum membrane);GO:0005794(Golgi apparatus);GO:0005886(plasma membrane);GO:0006955(immune response);GO…	04145(Phagosome);04514(Cell adhesion molecules (CAMs));04612(Antigen processing and presentation);04640(Hematopoietic cell lineage);04658(Th1 and Th2 cell differentiation);04659(Th17 cell differentiation);04672(Intestinal immune network for IgA production);04940(Type I diabetes mellitus);05140(Leishmaniasis);05145(Toxoplasmosis);05150(Staphylococcus aureus infection);05152(Tuberculosis);05164(Inf…	K06752	NA
0	ENSG00000204287	HLA-DRA	11.4678	8.61372	0.412886	1.59561e-101	6.93037e-97	major histocompatibility complex, class II, DR alpha [Source:HGNC Symbol;Acc:HGNC:4947]	GO:0000139(Golgi membrane);GO:0002376(immune system process);GO:0002503(peptide antigen assembly with MHC class II protein complex);GO:0002504(antigen processing and presentation of peptide or polysaccharide antigen via MHC class II);GO:0002506(polysaccharide assembly with MHC class II protein complex);GO:0005515(protein binding);GO:0005764(lysosome);GO:0005765(lysosomal membrane);GO:0005768(endo…	04145(Phagosome);04514(Cell adhesion molecules (CAMs));04612(Antigen processing and presentation);04640(Hematopoietic cell lineage);04658(Th1 and Th2 cell differentiation);04659(Th17 cell differentiation);04672(Intestinal immune network for IgA production);04940(Type I diabetes mellitus);05140(Leishmaniasis);05145(Toxoplasmosis);05150(Staphylococcus aureus infection);05152(Tuberculosis);05164(Inf…	K06752	NA
0	ENSG00000198840	MT-ND3	69.703	56.8053	0.295194	1.19825e-100	5.2045e-96	mitochondrially encoded NADH:ubiquinone oxidoreductase core subunit 3 [Source:HGNC Symbol;Acc:HGNC:7458]	GO:0005515(protein binding);GO:0005739(mitochondrion);GO:0005743(mitochondrial inner membrane);GO:0005747(mitochondrial respiratory chain complex I);GO:0006120(mitochondrial electron transport, NADH to ubiquinone);GO:0006979(response to oxidative stress);GO:0008137(NADH dehydrogenase (ubiquinone) activity);GO:0009642(response to light intensity);GO:0009725(response to hormone);GO:0016020(membrane…	00190(Oxidative phosphorylation);04714(Thermogenesis);04723(Retrograde endocannabinoid signaling);05012(Parkinson disease)	K03880	EC:7.1.1.2
0	ENSG00000265972	TXNIP	9.87492	8.13858	0.278991	1.81451e-98	7.88115e-94	thioredoxin interacting protein [Source:HGNC Symbol;Acc:HGNC:16952]	GO:0000122(negative regulation of transcription by RNA polymerase II);GO:0004857(enzyme inhibitor activity);GO:0005515(protein binding);GO:0005634(nucleus);GO:0005737(cytoplasm);GO:0005758(mitochondrial intermembrane space);GO:0005829(cytosol);GO:0006606(protein import into nucleus);GO:0006979(response to oxidative stress);GO:0007049(cell cycle);GO:0009612(response to mechanical stimulus);GO:0009…	04621(NOD-like receptor signaling pathway)	K20910	NA
0	ENSG00000173372	C1QA	12.0223	9.28153	0.373274	3.65026e-92	1.58545e-87	complement C1q A chain [Source:HGNC Symbol;Acc:HGNC:1241]	GO:0001540(amyloid-beta binding);GO:0002376(immune system process);GO:0005515(protein binding);GO:0005576(extracellular region);GO:0005581(collagen trimer);GO:0005602(complement component C1 complex);GO:0005623(cell);GO:0006956(complement activation);GO:0006958(complement activation, classical pathway);GO:0007267(cell-cell signaling);GO:0007568(aging);GO:0010039(response to iron ion);GO:0016322(n…	04610(Complement and coagulation cascades);05020(Prion diseases);05133(Pertussis);05142(Chagas disease (American trypanosomiasis));05150(Staphylococcus aureus infection);05322(Systemic lupus erythematosus)	NA	NA
0	ENSG00000102786	INTS6	3.39076	2.70684	0.325003	4.55745e-92	1.97948e-87	integrator complex subunit 6 [Source:HGNC Symbol;Acc:HGNC:14879]	GO:0004888(transmembrane signaling receptor activity);GO:0005515(protein binding);GO:0005634(nucleus);GO:0005654(nucleoplasm);GO:0015629(actin cytoskeleton);GO:0016180(snRNA processing);GO:0032039(integrator complex);GO:0034472(snRNA 3'-end processing);GO:0042795(snRNA transcription by RNA polymerase II)	NA	K13143	NA
0	ENSG00000212907	MT-ND4L	6.73192	5.50661	0.289854	1.62777e-91	7.07005e-87	mitochondrially encoded NADH:ubiquinone oxidoreductase core subunit 4L [Source:HGNC Symbol;Acc:HGNC:7460]	GO:0005739(mitochondrion);GO:0005747(mitochondrial respiratory chain complex I);GO:0006120(mitochondrial electron transport, NADH to ubiquinone);GO:0008137(NADH dehydrogenase (ubiquinone) activity);GO:0016020(membrane);GO:0016021(integral component of membrane);GO:0016491(oxidoreductase activity);GO:0016651(oxidoreductase activity, acting on NAD(P)H);GO:0030964(NADH dehydrogenase complex);GO:0031…	00190(Oxidative phosphorylation);04714(Thermogenesis);04723(Retrograde endocannabinoid signaling);05012(Parkinson disease)	K03882	EC:7.1.1.2
0	ENSG00000267519	AC020916.1	3.98025	3.25044	0.292222	1.46381e-86	6.35792e-82	novel transcript	NA	NA	NA	NA
0	ENSG00000198888	MT-ND1	56.1981	45.8076	0.294935	4.34382e-86	1.8867e-81	mitochondrially encoded NADH:ubiquinone oxidoreductase core subunit 1 [Source:HGNC Symbol;Acc:HGNC:7455]	GO:0003954(NADH dehydrogenase activity);GO:0005515(protein binding);GO:0005739(mitochondrion);GO:0005743(mitochondrial inner membrane);GO:0005747(mitochondrial respiratory chain complex I);GO:0006120(mitochondrial electron transport, NADH to ubiquinone);GO:0008137(NADH dehydrogenase (ubiquinone) activity);GO:0009060(aerobic respiration);GO:0014070(response to organic cyclic compound);GO:0016020(m…	00190(Oxidative phosphorylation);04714(Thermogenesis);04723(Retrograde endocannabinoid signaling);05012(Parkinson disease)	K03878	EC:7.1.1.2
0	ENSG00000231389	HLA-DPA1	3.67586	2.71815	0.435454	3.3724e-84	1.46477e-79	major histocompatibility complex, class II, DP alpha 1 [Source:HGNC Symbol;Acc:HGNC:4938]	GO:0000139(Golgi membrane);GO:0002376(immune system process);GO:0002504(antigen processing and presentation of peptide or polysaccharide antigen via MHC class II);GO:0005764(lysosome);GO:0005765(lysosomal membrane);GO:0005768(endosome);GO:0005783(endoplasmic reticulum);GO:0005789(endoplasmic reticulum membrane);GO:0005794(Golgi apparatus);GO:0005886(plasma membrane);GO:0005887(integral component …	04145(Phagosome);04514(Cell adhesion molecules (CAMs));04612(Antigen processing and presentation);04640(Hematopoietic cell lineage);04658(Th1 and Th2 cell differentiation);04659(Th17 cell differentiation);04672(Intestinal immune network for IgA production);04940(Type I diabetes mellitus);05140(Leishmaniasis);05145(Toxoplasmosis);05150(Staphylococcus aureus infection);05152(Tuberculosis);05164(Inf…	K06752	NA
0	ENSG00000198727	MT-CYB	63.3619	51.9843	0.285539	2.94969e-82	1.28117e-77	mitochondrially encoded cytochrome b [Source:HGNC Symbol;Acc:HGNC:7427]	GO:0001666(response to hypoxia);GO:0005739(mitochondrion);GO:0005743(mitochondrial inner membrane);GO:0005750(mitochondrial respiratory chain complex III);GO:0006122(mitochondrial electron transport, ubiquinol to cytochrome c);GO:0007584(response to nutrient);GO:0008121(ubiquinol-cytochrome-c reductase activity);GO:0009055(electron transfer activity);GO:0009408(response to heat);GO:0009636(respon…	00190(Oxidative phosphorylation);04260(Cardiac muscle contraction);04714(Thermogenesis);04932(Non-alcoholic fatty liver disease (NAFLD));05010(Alzheimer disease);05012(Parkinson disease);05016(Huntington disease)	K00412	NA
0	ENSG00000198786	MT-ND5	22.1932	18.0667	0.296785	3.43053e-79	1.49002e-74	mitochondrially encoded NADH:ubiquinone oxidoreductase core subunit 5 [Source:HGNC Symbol;Acc:HGNC:7461]	GO:0001666(response to hypoxia);GO:0003954(NADH dehydrogenase activity);GO:0005739(mitochondrion);GO:0005743(mitochondrial inner membrane);GO:0005747(mitochondrial respiratory chain complex I);GO:0006120(mitochondrial electron transport, NADH to ubiquinone);GO:0008137(NADH dehydrogenase (ubiquinone) activity);GO:0010243(response to organonitrogen compound);GO:0016020(membrane);GO:0016021(integral…	00190(Oxidative phosphorylation);04714(Thermogenesis);04723(Retrograde endocannabinoid signaling);05012(Parkinson disease)	K03883	EC:7.1.1.2
0	ENSG00000110077	MS4A6A	5.21336	4.10131	0.346129	1.60175e-78	6.95702e-74	membrane spanning 4-domains A6A [Source:HGNC Symbol;Acc:HGNC:13375]	GO:0016020(membrane);GO:0016021(integral component of membrane)	NA	K22191	NA
0	ENSG00000132002	DNAJB1	8.90851	6.94755	0.358681	1.96413e-78	8.53101e-74	DnaJ heat shock protein family (Hsp40) member B1 [Source:HGNC Symbol;Acc:HGNC:5270]	GO:0000122(negative regulation of transcription by RNA polymerase II);GO:0001671(ATPase activator activity);GO:0003714(transcription corepressor activity);GO:0005515(protein binding);GO:0005634(nucleus);GO:0005654(nucleoplasm);GO:0005730(nucleolus);GO:0005737(cytoplasm);GO:0005829(cytosol);GO:0006457(protein folding);GO:0006986(response to unfolded protein);GO:0014069(postsynaptic density);GO:003…	04141(Protein processing in endoplasmic reticulum);05164(Influenza A)	K09507	NA
0	ENSG00000223865	HLA-DPB1	3.16302	2.2588	0.485748	4.05484e-78	1.76118e-73	major histocompatibility complex, class II, DP beta 1 [Source:HGNC Symbol;Acc:HGNC:4940]	GO:0000139(Golgi membrane);GO:0002376(immune system process);GO:0002504(antigen processing and presentation of peptide or polysaccharide antigen via MHC class II);GO:0005764(lysosome);GO:0005765(lysosomal membrane);GO:0005768(endosome);GO:0005783(endoplasmic reticulum);GO:0005789(endoplasmic reticulum membrane);GO:0005794(Golgi apparatus);GO:0005886(plasma membrane);GO:0006955(immune response);GO…	04145(Phagosome);04514(Cell adhesion molecules (CAMs));04612(Antigen processing and presentation);04640(Hematopoietic cell lineage);04658(Th1 and Th2 cell differentiation);04659(Th17 cell differentiation);04672(Intestinal immune network for IgA production);04940(Type I diabetes mellitus);05140(Leishmaniasis);05145(Toxoplasmosis);05150(Staphylococcus aureus infection);05152(Tuberculosis);05164(Inf…	K06752	NA
0	ENSG00000165168	CYBB	4.6389	3.81536	0.281961	6.02541e-78	2.61707e-73	cytochrome b-245 beta chain [Source:HGNC Symbol;Acc:HGNC:2578]	GO:0002479(antigen processing and presentation of exogenous peptide antigen via MHC class I, TAP-dependent);GO:0005244(voltage-gated ion channel activity);GO:0005515(protein binding);GO:0005635(nuclear envelope);GO:0005737(cytoplasm);GO:0005783(endoplasmic reticulum);GO:0005789(endoplasmic reticulum membrane);GO:0005791(rough endoplasmic reticulum);GO:0005794(Golgi apparatus);GO:0005886(plasma me…	04066(HIF-1 signaling pathway);04145(Phagosome);04216(Ferroptosis);04217(Necroptosis);04621(NOD-like receptor signaling pathway);04670(Leukocyte transendothelial migration);04933(AGE-RAGE signaling pathway in diabetic complications);05140(Leishmaniasis)	NA	NA
0	ENSG00000196126	HLA-DRB1	4.19189	3.4318	0.288635	2.12987e-76	9.25087e-72	major histocompatibility complex, class II, DR beta 1 [Source:HGNC Symbol;Acc:HGNC:4948]	GO:0000139(Golgi membrane);GO:0001618(virus receptor activity);GO:0002376(immune system process);GO:0002381(immunoglobulin production involved in immunoglobulin mediated immune response);GO:0002437(inflammatory response to antigenic stimulus);GO:0002455(humoral immune response mediated by circulating immunoglobulin);GO:0002504(antigen processing and presentation of peptide or polysaccharide antig…	04145(Phagosome);04514(Cell adhesion molecules (CAMs));04612(Antigen processing and presentation);04640(Hematopoietic cell lineage);04658(Th1 and Th2 cell differentiation);04659(Th17 cell differentiation);04672(Intestinal immune network for IgA production);04940(Type I diabetes mellitus);05140(Leishmaniasis);05145(Toxoplasmosis);05150(Staphylococcus aureus infection);05152(Tuberculosis);05164(Inf…	K06752	NA
0	ENSG00000023445	BIRC3	1.45764	1.1797	0.305209	6.88117e-76	2.98877e-71	baculoviral IAP repeat containing 3 [Source:HGNC Symbol;Acc:HGNC:591]	GO:0002756(MyD88-independent toll-like receptor signaling pathway);GO:0004842(ubiquitin-protein transferase activity);GO:0005515(protein binding);GO:0005634(nucleus);GO:0005654(nucleoplasm);GO:0005737(cytoplasm);GO:0005829(cytosol);GO:0006915(apoptotic process);GO:0007166(cell surface receptor signaling pathway);GO:0007249(I-kappaB kinase/NF-kappaB signaling);GO:0007283(spermatogenesis);GO:001080…	01524(Platinum drug resistance);04064(NF-kappa B signaling pathway);04120(Ubiquitin mediated proteolysis);04210(Apoptosis);04215(Apoptosis - multiple species);04217(Necroptosis);04510(Focal adhesion);04621(NOD-like receptor signaling pathway);04668(TNF signaling pathway);05145(Toxoplasmosis);05168(Herpes simplex virus 1 infection);05200(Pathways in cancer);05202(Transcriptional misregulation in c…	NA	NA
0	ENSG00000211459	MT-RNR1	120.128	100.037	0.264047	2.31785e-75	1.00673e-70	mitochondrially encoded 12S RNA [Source:HGNC Symbol;Acc:HGNC:7470]	NA	NA	NA	NA
0	ENSG00000167604	AD000864.1	1.26682	0.986385	0.360984	2.47977e-75	1.07707e-70	NFKB inhibitor delta [Source:NCBI gene;Acc:84807]	GO:0005515(protein binding);GO:0005634(nucleus);GO:0006954(inflammatory response);GO:0032088(negative regulation of NF-kappaB transcription factor activity);GO:0033085(negative regulation of T cell differentiation in thymus);GO:0043124(negative regulation of I-kappaB kinase/NF-kappaB signaling);GO:0050852(T cell receptor signaling pathway);GO:0051059(NF-kappaB binding);GO:0070245(positive regulat…	NA	K14214	NA
0	ENSG00000010327	STAB1	5.61762	4.50585	0.31816	1.69768e-74	7.37371e-70	stabilin 1 [Source:HGNC Symbol;Acc:HGNC:18628]	GO:0005041(low-density lipoprotein particle receptor activity);GO:0005044(scavenger receptor activity);GO:0005509(calcium ion binding);GO:0005515(protein binding);GO:0005540(hyaluronic acid binding);GO:0005886(plasma membrane);GO:0005887(integral component of plasma membrane);GO:0006898(receptor-mediated endocytosis);GO:0006954(inflammatory response);GO:0007155(cell adhesion);GO:0007267(cell-cell…	NA	K19020	NA
0	ENSG00000123358	NR4A1	2.56496	2.12056	0.274486	4.11198e-73	1.786e-68	nuclear receptor subfamily 4 group A member 1 [Source:HGNC Symbol;Acc:HGNC:7980]	GO:0000977(RNA polymerase II regulatory region sequence-specific DNA binding);GO:0000978(RNA polymerase II proximal promoter sequence-specific DNA binding);GO:0000981(DNA-binding transcription factor activity, RNA polymerase II-specific);GO:0001228(DNA-binding transcription activator activity, RNA polymerase II-specific);GO:0001938(positive regulation of endothelial cell proliferation);GO:0002042…	04010(MAPK signaling pathway);04151(PI3K-Akt signaling pathway);04925(Aldosterone synthesis and secretion);04927(Cortisol synthesis and secretion);04934(Cushing syndrome)	K04465	NA
0	ENSG00000127528	KLF2	2.97525	2.39788	0.311254	1.26771e-69	5.50616e-65	Kruppel like factor 2 [Source:HGNC Symbol;Acc:HGNC:6347]	GO:0000122(negative regulation of transcription by RNA polymerase II);GO:0000790(nuclear chromatin);GO:0000902(cell morphogenesis);GO:0000981(DNA-binding transcription factor activity, RNA polymerase II-specific);GO:0001701(in utero embryonic development);GO:0003676(nucleic acid binding);GO:0003677(DNA binding);GO:0003700(DNA-binding transcription factor activity);GO:0005515(protein binding);GO:0…	04068(FoxO signaling pathway);04371(Apelin signaling pathway);05418(Fluid shear stress and atherosclerosis)	K17845	NA
0	ENSG00000129534	MIS18BP1	1.56964	1.29011	0.282941	8.10235e-69	3.51917e-64	MIS18 binding protein 1 [Source:HGNC Symbol;Acc:HGNC:20190]	GO:0000775(chromosome, centromeric region);GO:0000778(condensed nuclear chromosome kinetochore);GO:0000981(DNA-binding transcription factor activity, RNA polymerase II-specific);GO:0003677(DNA binding);GO:0005515(protein binding);GO:0005634(nucleus);GO:0005654(nucleoplasm);GO:0005694(chromosome);GO:0006357(regulation of transcription by RNA polymerase II);GO:0007049(cell cycle);GO:0034080(CENP-A …	NA	NA	NA
0	ENSG00000251562	MALAT1	377.222	280.882	0.425448	8.7708e-69	3.80951e-64	metastasis associated lung adenocarcinoma transcript 1 [Source:HGNC Symbol;Acc:HGNC:29665]	NA	NA	NA	NA
0	ENSG00000168542	COL3A1	0.747663	0.576921	0.374014	4.15968e-68	1.80672e-63	collagen type III alpha 1 chain [Source:HGNC Symbol;Acc:HGNC:2201]	GO:0001501(skeletal system development);GO:0001568(blood vessel development);GO:0002020(protease binding);GO:0005178(integrin binding);GO:0005201(extracellular matrix structural constituent);GO:0005515(protein binding);GO:0005576(extracellular region);GO:0005581(collagen trimer);GO:0005586(collagen type III trimer);GO:0005615(extracellular space);GO:0005788(endoplasmic reticulum lumen);GO:0007160…	04611(Platelet activation);04926(Relaxin signaling pathway);04933(AGE-RAGE signaling pathway in diabetic complications);04974(Protein digestion and absorption);05146(Amoebiasis)	K19720	NA
0	ENSG00000164692	COL1A2	0.814015	0.642222	0.341984	2.03088e-66	8.82093e-62	collagen type I alpha 2 chain [Source:HGNC Symbol;Acc:HGNC:2198]	GO:0001501(skeletal system development);GO:0001568(blood vessel development);GO:0002020(protease binding);GO:0005201(extracellular matrix structural constituent);GO:0005515(protein binding);GO:0005576(extracellular region);GO:0005581(collagen trimer);GO:0005584(collagen type I trimer);GO:0005615(extracellular space);GO:0005783(endoplasmic reticulum);GO:0005788(endoplasmic reticulum lumen);GO:0007…	04151(PI3K-Akt signaling pathway);04510(Focal adhesion);04512(ECM-receptor interaction);04611(Platelet activation);04926(Relaxin signaling pathway);04933(AGE-RAGE signaling pathway in diabetic complications);04974(Protein digestion and absorption);05146(Amoebiasis);05165(Human papillomavirus infection)	NA	NA
0	ENSG00000280138	AC027290.2	1.53013	1.24801	0.294017	8.47109e-65	3.67933e-60	novel transcript	NA	NA	NA	NA
0	ENSG00000133800	LYVE1	4.90119	3.6019	0.444374	2.45722e-63	1.06727e-58	lymphatic vessel endothelial hyaluronan receptor 1 [Source:HGNC Symbol;Acc:HGNC:14687]	GO:0004888(transmembrane signaling receptor activity);GO:0005515(protein binding);GO:0005540(hyaluronic acid binding);GO:0005886(plasma membrane);GO:0005887(integral component of plasma membrane);GO:0006027(glycosaminoglycan catabolic process);GO:0007155(cell adhesion);GO:0007160(cell-matrix adhesion);GO:0009611(response to wounding);GO:0009653(anatomical structure morphogenesis);GO:0016020(membr…	NA	K19012	NA
0	ENSG00000187193	MT1X	2.37721	1.89585	0.326428	7.91815e-60	3.43917e-55	metallothionein 1X [Source:HGNC Symbol;Acc:HGNC:7405]	GO:0005515(protein binding);GO:0005634(nucleus);GO:0005737(cytoplasm);GO:0006882(cellular zinc ion homeostasis);GO:0008270(zinc ion binding);GO:0010038(response to metal ion);GO:0010273(detoxification of copper ion);GO:0036018(cellular response to erythropoietin);GO:0045926(negative regulation of growth);GO:0046872(metal ion binding);GO:0048471(perinuclear region of cytoplasm);GO:0071276(cellular…	04978(Mineral absorption)	K14739	NA
0	ENSG00000210082	MT-RNR2	335.088	277.739	0.270807	8.09779e-59	3.51719e-54	mitochondrially encoded 16S RNA [Source:HGNC Symbol;Acc:HGNC:7471]	NA	NA	NA	NA
0	ENSG00000158050	DUSP2	1.82808	1.52546	0.261084	1.19439e-58	5.1877e-54	dual specificity phosphatase 2 [Source:HGNC Symbol;Acc:HGNC:3068]	GO:0000188(inactivation of MAPK activity);GO:0004721(phosphoprotein phosphatase activity);GO:0004725(protein tyrosine phosphatase activity);GO:0005515(protein binding);GO:0005634(nucleus);GO:0005737(cytoplasm);GO:0006470(protein dephosphorylation);GO:0008138(protein tyrosine/serine/threonine phosphatase activity);GO:0008330(protein tyrosine/threonine phosphatase activity);GO:0016311(dephosphoryla…	04010(MAPK signaling pathway)	K04459	3.1.3.48;EC:3.1.3.16
0	ENSG00000241399	CD302	1.5189	1.22755	0.307249	1.85888e-58	8.07386e-54	CD302 molecule [Source:HGNC Symbol;Acc:HGNC:30843]	GO:0005737(cytoplasm);GO:0005902(microvillus);GO:0005938(cell cortex);GO:0006909(phagocytosis);GO:0016020(membrane);GO:0016021(integral component of membrane);GO:0030175(filopodium);GO:0030246(carbohydrate binding);GO:0042995(cell projection)	NA	K06722	NA
0	ENSG00000028277	POU2F2	1.46753	1.18961	0.302906	2.11515e-58	9.18694e-54	POU class 2 homeobox 2 [Source:HGNC Symbol;Acc:HGNC:9213]	GO:0000978(RNA polymerase II proximal promoter sequence-specific DNA binding);GO:0000981(DNA-binding transcription factor activity, RNA polymerase II-specific);GO:0001228(DNA-binding transcription activator activity, RNA polymerase II-specific);GO:0002335(mature B cell differentiation);GO:0002380(immunoglobulin secretion involved in immune response);GO:0003677(DNA binding);GO:0003700(DNA-binding …	05168(Herpes simplex virus 1 infection)	NA	NA
0	ENSG00000111341	MGP	2.56096	2.05932	0.314515	4.4998e-58	1.95444e-53	matrix Gla protein [Source:HGNC Symbol;Acc:HGNC:7060]	GO:0001502(cartilage condensation);GO:0001503(ossification);GO:0005201(extracellular matrix structural constituent);GO:0005509(calcium ion binding);GO:0005515(protein binding);GO:0005576(extracellular region);GO:0007275(multicellular organism development);GO:0008147(structural constituent of bone);GO:0030154(cell differentiation);GO:0030500(regulation of bone mineralization);GO:0031012(extracellu…	NA	K19481	NA
0	ENSG00000229807	XIST	1.47301	1.12281	0.391658	9.72398e-55	4.22351e-50	X inactive specific transcript [Source:HGNC Symbol;Acc:HGNC:12810]	NA	NA	NA	NA
0	ENSG00000253320	AZIN1-AS1	0.916272	0.756045	0.277304	5.72092e-53	2.48482e-48	AZIN1 antisense RNA 1 [Source:HGNC Symbol;Acc:HGNC:51558]	NA	NA	NA	NA
0	ENSG00000134830	C5AR2	1.05935	0.881161	0.2657	4.02941e-52	1.75013e-47	complement component 5a receptor 2 [Source:HGNC Symbol;Acc:HGNC:4527]	GO:0002430(complement receptor mediated signaling pathway);GO:0004878(complement component C5a receptor activity);GO:0004930(G protein-coupled receptor activity);GO:0005515(protein binding);GO:0005886(plasma membrane);GO:0006935(chemotaxis);GO:0006954(inflammatory response);GO:0007165(signal transduction);GO:0007186(G protein-coupled receptor signaling pathway);GO:0007200(phospholipase C-activati…	NA	K04171	NA
0	ENSG00000099875	MKNK2	0.958379	0.79635	0.267194	1.43735e-51	6.243e-47	MAP kinase interacting serine/threonine kinase 2 [Source:HGNC Symbol;Acc:HGNC:7111]	GO:0000166(nucleotide binding);GO:0004672(protein kinase activity);GO:0004674(protein serine/threonine kinase activity);GO:0004683(calmodulin-dependent protein kinase activity);GO:0005515(protein binding);GO:0005516(calmodulin binding);GO:0005524(ATP binding);GO:0005634(nucleus);GO:0005654(nucleoplasm);GO:0005737(cytoplasm);GO:0006417(regulation of translation);GO:0006468(protein phosphorylation)…	04010(MAPK signaling pathway);04066(HIF-1 signaling pathway);04910(Insulin signaling pathway)	K04372	EC:2.7.11.1
0	ENSG00000120738	EGR1	3.77273	2.89766	0.380721	5.65574e-51	2.45651e-46	early growth response 1 [Source:HGNC Symbol;Acc:HGNC:3238]	GO:0000122(negative regulation of transcription by RNA polymerase II);GO:0000976(transcription regulatory region sequence-specific DNA binding);GO:0000977(RNA polymerase II regulatory region sequence-specific DNA binding);GO:0000981(DNA-binding transcription factor activity, RNA polymerase II-specific);GO:0001228(DNA-binding transcription activator activity, RNA polymerase II-specific);GO:0001666…	04371(Apelin signaling pathway);04912(GnRH signaling pathway);04928(Parathyroid hormone synthesis, secretion and action);04933(AGE-RAGE signaling pathway in diabetic complications);05020(Prion diseases);05166(Human T-cell leukemia virus 1 infection)	NA	NA
0	ENSG00000185432	METTL7A	1.43161	1.16651	0.29544	1.7054e-48	7.40722e-44	methyltransferase like 7A [Source:HGNC Symbol;Acc:HGNC:24550]	GO:0005576(extracellular region);GO:0005783(endoplasmic reticulum);GO:0005811(lipid droplet);GO:0008168(methyltransferase activity);GO:0016020(membrane);GO:0016021(integral component of membrane);GO:0016740(transferase activity);GO:0032259(methylation);GO:0043312(neutrophil degranulation);GO:1904724(tertiary granule lumen)	NA	NA	NA
0	ENSG00000091986	CCDC80	0.769232	0.586034	0.392433	5.6781e-47	2.46623e-42	coiled-coil domain containing 80 [Source:HGNC Symbol;Acc:HGNC:30649]	GO:0001968(fibronectin binding);GO:0005539(glycosaminoglycan binding);GO:0005576(extracellular region);GO:0005604(basement membrane);GO:0005614(interstitial matrix);GO:0008201(heparin binding);GO:0009617(response to bacterium);GO:0010811(positive regulation of cell-substrate adhesion);GO:0016020(membrane);GO:0016021(integral component of membrane);GO:0030198(extracellular matrix organization);GO:…	NA	NA	NA
0	ENSG00000169715	MT1E	1.12309	0.883671	0.34589	6.71634e-45	2.91717e-40	metallothionein 1E [Source:HGNC Symbol;Acc:HGNC:7397]	GO:0005634(nucleus);GO:0005737(cytoplasm);GO:0006882(cellular zinc ion homeostasis);GO:0008270(zinc ion binding);GO:0010273(detoxification of copper ion);GO:0045926(negative regulation of growth);GO:0046872(metal ion binding);GO:0048471(perinuclear region of cytoplasm);GO:0071276(cellular response to cadmium ion);GO:0071280(cellular response to copper ion);GO:0071294(cellular response to zinc ion)	04978(Mineral absorption)	K14739	NA
0	ENSG00000169385	RNASE2	0.829611	0.658832	0.332523	9.07992e-45	3.94377e-40	ribonuclease A family member 2 [Source:HGNC Symbol;Acc:HGNC:10045]	GO:0003676(nucleic acid binding);GO:0004518(nuclease activity);GO:0004519(endonuclease activity);GO:0004540(ribonuclease activity);GO:0005576(extracellular region);GO:0005764(lysosome);GO:0006401(RNA catabolic process);GO:0006935(chemotaxis);GO:0016787(hydrolase activity);GO:0035578(azurophil granule lumen);GO:0043312(neutrophil degranulation);GO:0051607(defense response to virus);GO:0070062(extr…	NA	K01168	EC:4.6.1.18
0	ENSG00000108821	COL1A1	0.647116	0.523044	0.307091	7.92888e-43	3.44383e-38	collagen type I alpha 1 chain [Source:HGNC Symbol;Acc:HGNC:2197]	GO:0001501(skeletal system development);GO:0001503(ossification);GO:0001568(blood vessel development);GO:0001649(osteoblast differentiation);GO:0001957(intramembranous ossification);GO:0001958(endochondral ossification);GO:0002020(protease binding);GO:0005201(extracellular matrix structural constituent);GO:0005515(protein binding);GO:0005576(extracellular region);GO:0005581(collagen trimer);GO:00…	04151(PI3K-Akt signaling pathway);04510(Focal adhesion);04512(ECM-receptor interaction);04611(Platelet activation);04926(Relaxin signaling pathway);04933(AGE-RAGE signaling pathway in diabetic complications);04974(Protein digestion and absorption);05146(Amoebiasis);05165(Human papillomavirus infection)	K06236	NA
0	ENSG00000011465	DCN	0.848156	0.705469	0.265747	1.43182e-38	6.21895e-34	decorin [Source:HGNC Symbol;Acc:HGNC:2705]	GO:0001822(kidney development);GO:0001890(placenta development);GO:0003723(RNA binding);GO:0005515(protein binding);GO:0005518(collagen binding);GO:0005539(glycosaminoglycan binding);GO:0005576(extracellular region);GO:0005589(collagen type VI trimer);GO:0005615(extracellular space);GO:0005796(Golgi lumen);GO:0007519(skeletal muscle tissue development);GO:0007568(aging);GO:0009612(response to mec…	04350(TGF-beta signaling pathway);05205(Proteoglycans in cancer)	NA	NA
0	ENSG00000136634	IL10	1.36233	1.13023	0.269453	2.01969e-35	8.77234e-31	interleukin 10 [Source:HGNC Symbol;Acc:HGNC:5962]	GO:0001818(negative regulation of cytokine production);GO:0001938(positive regulation of endothelial cell proliferation);GO:0002237(response to molecule of bacterial origin);GO:0002740(negative regulation of cytokine secretion involved in immune response);GO:0002875(negative regulation of chronic inflammatory response to antigenic stimulus);GO:0002904(positive regulation of B cell apoptotic proce…	04060(Cytokine-cytokine receptor interaction);04068(FoxO signaling pathway);04625(C-type lectin receptor signaling pathway);04630(Jak-STAT signaling pathway);04660(T cell receptor signaling pathway);04672(Intestinal immune network for IgA production);05133(Pertussis);05140(Leishmaniasis);05142(Chagas disease (American trypanosomiasis));05143(African trypanosomiasis);05144(Malaria);05145(Toxoplasm…	K05443	NA
0	ENSG00000188257	PLA2G2A	0.642762	0.526082	0.288998	3.81907e-35	1.65877e-30	phospholipase A2 group IIA [Source:HGNC Symbol;Acc:HGNC:9031]	GO:0004623(phospholipase A2 activity);GO:0005509(calcium ion binding);GO:0005543(phospholipid binding);GO:0005576(extracellular region);GO:0005615(extracellular space);GO:0005783(endoplasmic reticulum);GO:0005789(endoplasmic reticulum membrane);GO:0005886(plasma membrane);GO:0006629(lipid metabolic process);GO:0006644(phospholipid metabolic process);GO:0006654(phosphatidic acid biosynthetic proce…	00564(Glycerophospholipid metabolism);00565(Ether lipid metabolism);00590(Arachidonic acid metabolism);00591(Linoleic acid metabolism);00592(alpha-Linolenic acid metabolism);04014(Ras signaling pathway);04270(Vascular smooth muscle contraction);04972(Pancreatic secretion);04975(Fat digestion and absorption)	K01047	EC:3.1.1.4
0	ENSG00000269821	KCNQ1OT1	2.28322	1.89141	0.271614	5.65293e-34	2.45529e-29	KCNQ1 opposite strand/antisense transcript 1 [Source:HGNC Symbol;Acc:HGNC:6295]	NA	NA	NA	NA
0	ENSG00000137801	THBS1	8.39723	6.83355	0.297279	1.24464e-33	5.40595e-29	thrombospondin 1 [Source:HGNC Symbol;Acc:HGNC:11785]	GO:0000187(activation of MAPK activity);GO:0001666(response to hypoxia);GO:0001786(phosphatidylserine binding);GO:0001937(negative regulation of endothelial cell proliferation);GO:0001953(negative regulation of cell-matrix adhesion);GO:0001968(fibronectin binding);GO:0002040(sprouting angiogenesis);GO:0002544(chronic inflammatory response);GO:0002576(platelet degranulation);GO:0002581(negative re…	04015(Rap1 signaling pathway);04115(p53 signaling pathway);04145(Phagosome);04151(PI3K-Akt signaling pathway);04350(TGF-beta signaling pathway);04510(Focal adhesion);04512(ECM-receptor interaction);05144(Malaria);05165(Human papillomavirus infection);05205(Proteoglycans in cancer);05206(MicroRNAs in cancer);05219(Bladder cancer)	K16857	NA
0	ENSG00000127951	FGL2	1.94596	1.61754	0.266677	1.75731e-32	7.63271e-28	fibrinogen like 2 [Source:HGNC Symbol;Acc:HGNC:3696]	GO:0005201(extracellular matrix structural constituent);GO:0005576(extracellular region);GO:0005577(fibrinogen complex);GO:0006508(proteolysis);GO:0008233(peptidase activity);GO:0043312(neutrophil degranulation);GO:0062023(collagen-containing extracellular matrix);GO:0070062(extracellular exosome);GO:1904813(ficolin-1-rich granule lumen)	NA	NA	NA
0	ENSG00000073756	PTGS2	1.41471	1.15574	0.29169	6.28521e-32	2.72992e-27	prostaglandin-endoperoxide synthase 2 [Source:HGNC Symbol;Acc:HGNC:9605]	GO:0001516(prostaglandin biosynthetic process);GO:0001525(angiogenesis);GO:0004601(peroxidase activity);GO:0004666(prostaglandin-endoperoxide synthase activity);GO:0005515(protein binding);GO:0005737(cytoplasm);GO:0005783(endoplasmic reticulum);GO:0005788(endoplasmic reticulum lumen);GO:0005789(endoplasmic reticulum membrane);GO:0005901(caveola);GO:0006629(lipid metabolic process);GO:0006631(fatt…	00590(Arachidonic acid metabolism);04064(NF-kappa B signaling pathway);04370(VEGF signaling pathway);04625(C-type lectin receptor signaling pathway);04657(IL-17 signaling pathway);04668(TNF signaling pathway);04723(Retrograde endocannabinoid signaling);04726(Serotonergic synapse);04913(Ovarian steroidogenesis);04921(Oxytocin signaling pathway);04923(Regulation of lipolysis in adipocytes);05140(Le…	K11987	EC:1.14.99.1
0	ENSG00000125144	MT1G	1.28854	1.00161	0.363412	3.75817e-17	1.63232e-12	metallothionein 1G [Source:HGNC Symbol;Acc:HGNC:7399]	GO:0005515(protein binding);GO:0005634(nucleus);GO:0005737(cytoplasm);GO:0006882(cellular zinc ion homeostasis);GO:0008270(zinc ion binding);GO:0010273(detoxification of copper ion);GO:0030224(monocyte differentiation);GO:0035924(cellular response to vascular endothelial growth factor stimulus);GO:0042117(monocyte activation);GO:0045926(negative regulation of growth);GO:0046872(metal ion binding)…	04978(Mineral absorption)	K14739	NA
1	ENSG00000100979	PLTP	7.14415	2.66471	1.42278	0	0	phospholipid transfer protein [Source:HGNC Symbol;Acc:HGNC:9093]	GO:0005319(lipid transporter activity);GO:0005548(phospholipid transporter activity);GO:0005576(extracellular region);GO:0005615(extracellular space);GO:0006629(lipid metabolic process);GO:0006869(lipid transport);GO:0008289(lipid binding);GO:0008429(phosphatidylethanolamine binding);GO:0008525(phosphatidylcholine transporter activity);GO:0010189(vitamin E biosynthetic process);GO:0010875(positiv…	03320(PPAR signaling pathway);04979(Cholesterol metabolism)	K08761	NA
1	ENSG00000129538	RNASE1	20.2705	7.84679	1.3692	0	0	ribonuclease A family member 1, pancreatic [Source:HGNC Symbol;Acc:HGNC:10044]	GO:0003676(nucleic acid binding);GO:0004518(nuclease activity);GO:0004519(endonuclease activity);GO:0004522(ribonuclease A activity);GO:0004540(ribonuclease activity);GO:0005515(protein binding);GO:0005576(extracellular region);GO:0016787(hydrolase activity);GO:0070062(extracellular exosome);GO:0090305(nucleic acid phosphodiester bond hydrolysis);GO:0090501(RNA phosphodiester bond hydrolysis);GO:…	NA	K01168	EC:4.6.1.18
1	ENSG00000100600	LGMN	4.38794	1.82937	1.26219	0	0	legumain [Source:HGNC Symbol;Acc:HGNC:9472]	GO:0002224(toll-like receptor signaling pathway);GO:0003014(renal system process);GO:0004197(cysteine-type endopeptidase activity);GO:0005576(extracellular region);GO:0005737(cytoplasm);GO:0005764(lysosome);GO:0005770(late endosome);GO:0006508(proteolysis);GO:0006624(vacuolar protein processing);GO:0007613(memory);GO:0008233(peptidase activity);GO:0008234(cysteine-type peptidase activity);GO:0008…	04142(Lysosome);04612(Antigen processing and presentation)	NA	NA
1	ENSG00000260314	MRC1	6.26196	2.86062	1.13029	0	0	mannose receptor C-type 1 [Source:HGNC Symbol;Acc:HGNC:7228]	GO:0001618(virus receptor activity);GO:0004888(transmembrane signaling receptor activity);GO:0005515(protein binding);GO:0005537(mannose binding);GO:0005768(endosome);GO:0005886(plasma membrane);GO:0005887(integral component of plasma membrane);GO:0006897(endocytosis);GO:0006898(receptor-mediated endocytosis);GO:0009986(cell surface);GO:0010008(endosome membrane);GO:0016020(membrane);GO:0016021(i…	04145(Phagosome);05152(Tuberculosis)	K06560	NA
1	ENSG00000153071	DAB2	5.45653	2.50942	1.12063	0	0	DAB2, clathrin adaptor protein [Source:HGNC Symbol;Acc:HGNC:2662]	GO:0001650(fibrillar center);GO:0001934(positive regulation of protein phosphorylation);GO:0005515(protein binding);GO:0005737(cytoplasm);GO:0005765(lysosomal membrane);GO:0005829(cytosol);GO:0005886(plasma membrane);GO:0005905(clathrin-coated pit);GO:0005925(focal adhesion);GO:0006897(endocytosis);GO:0006898(receptor-mediated endocytosis);GO:0006915(apoptotic process);GO:0007275(multicellular or…	04144(Endocytosis)	K12475	NA
1	ENSG00000137491	SLCO2B1	2.73503	1.28315	1.09187	0	0	solute carrier organic anion transporter family member 2B1 [Source:HGNC Symbol;Acc:HGNC:10962]	GO:0001889(liver development);GO:0005215(transporter activity);GO:0005515(protein binding);GO:0005886(plasma membrane);GO:0005887(integral component of plasma membrane);GO:0006811(ion transport);GO:0008514(organic anion transmembrane transporter activity);GO:0015125(bile acid transmembrane transporter activity);GO:0015347(sodium-independent organic anion transmembrane transporter activity);GO:001…	NA	NA	NA
1	ENSG00000133800	LYVE1	6.55143	3.10458	1.07741	0	0	lymphatic vessel endothelial hyaluronan receptor 1 [Source:HGNC Symbol;Acc:HGNC:14687]	GO:0004888(transmembrane signaling receptor activity);GO:0005515(protein binding);GO:0005540(hyaluronic acid binding);GO:0005886(plasma membrane);GO:0005887(integral component of plasma membrane);GO:0006027(glycosaminoglycan catabolic process);GO:0007155(cell adhesion);GO:0007160(cell-matrix adhesion);GO:0009611(response to wounding);GO:0009653(anatomical structure morphogenesis);GO:0016020(membr…	NA	K19012	NA
1	ENSG00000010327	STAB1	6.88572	4.12624	0.738781	0	0	stabilin 1 [Source:HGNC Symbol;Acc:HGNC:18628]	GO:0005041(low-density lipoprotein particle receptor activity);GO:0005044(scavenger receptor activity);GO:0005509(calcium ion binding);GO:0005515(protein binding);GO:0005540(hyaluronic acid binding);GO:0005886(plasma membrane);GO:0005887(integral component of plasma membrane);GO:0006898(receptor-mediated endocytosis);GO:0006954(inflammatory response);GO:0007155(cell adhesion);GO:0007267(cell-cell…	NA	K19020	NA
1	ENSG00000092068	SLC7A8	1.24328	0.749803	0.729573	0	0	solute carrier family 7 member 8 [Source:HGNC Symbol;Acc:HGNC:11066]	GO:0003333(amino acid transmembrane transport);GO:0005515(protein binding);GO:0005737(cytoplasm);GO:0005886(plasma membrane);GO:0005887(integral component of plasma membrane);GO:0006520(cellular amino acid metabolic process);GO:0006865(amino acid transport);GO:0009636(response to toxic substance);GO:0015101(organic cation transmembrane transporter activity);GO:0015171(amino acid transmembrane tra…	04974(Protein digestion and absorption)	K13781	NA
1	ENSG00000155659	VSIG4	7.57367	4.63356	0.70887	0	0	V-set and immunoglobulin domain containing 4 [Source:HGNC Symbol;Acc:HGNC:17032]	GO:0001851(complement component C3b binding);GO:0002376(immune system process);GO:0006957(complement activation, alternative pathway);GO:0016020(membrane);GO:0016021(integral component of membrane);GO:0032703(negative regulation of interleukin-2 production);GO:0032991(protein-containing complex);GO:0042130(negative regulation of T cell proliferation);GO:0043031(negative regulation of macrophage a…	04610(Complement and coagulation cascades)	K19822	NA
1	ENSG00000164733	CTSB	31.0138	19.3469	0.680806	0	0	cathepsin B [Source:HGNC Symbol;Acc:HGNC:2527]	GO:0002224(toll-like receptor signaling pathway);GO:0004175(endopeptidase activity);GO:0004197(cysteine-type endopeptidase activity);GO:0005515(protein binding);GO:0005518(collagen binding);GO:0005576(extracellular region);GO:0005615(extracellular space);GO:0005622(intracellular);GO:0005730(nucleolus);GO:0005764(lysosome);GO:0006508(proteolysis);GO:0008233(peptidase activity);GO:0008234(cysteine-…	04140(Autophagy - animal);04142(Lysosome);04210(Apoptosis);04612(Antigen processing and presentation);04621(NOD-like receptor signaling pathway);04924(Renin secretion)	K01363	EC:3.4.22.1
1	ENSG00000177575	CD163	21.6561	14.7172	0.557269	0	0	CD163 molecule [Source:HGNC Symbol;Acc:HGNC:1631]	GO:0005044(scavenger receptor activity);GO:0005515(protein binding);GO:0005576(extracellular region);GO:0005886(plasma membrane);GO:0005887(integral component of plasma membrane);GO:0006898(receptor-mediated endocytosis);GO:0006953(acute-phase response);GO:0006954(inflammatory response);GO:0009897(external side of plasma membrane);GO:0016020(membrane);GO:0016021(integral component of membrane);GO…	NA	NA	NA
1	ENSG00000109099	PMP22	2.80223	1.19202	1.23317	0	0	peripheral myelin protein 22 [Source:HGNC Symbol;Acc:HGNC:9118]	GO:0005515(protein binding);GO:0005886(plasma membrane);GO:0005923(bicellular tight junction);GO:0007268(chemical synaptic transmission);GO:0007422(peripheral nervous system development);GO:0008219(cell death);GO:0008285(negative regulation of cell population proliferation);GO:0010977(negative regulation of neuron projection development);GO:0016020(membrane);GO:0016021(integral component of membr…	NA	K19289	NA
1	ENSG00000143162	CREG1	3.54899	2.02515	0.809379	0	0	cellular repressor of E1A stimulated genes 1 [Source:HGNC Symbol;Acc:HGNC:2351]	GO:0003714(transcription corepressor activity);GO:0005576(extracellular region);GO:0005615(extracellular space);GO:0005667(transcription factor complex);GO:0006355(regulation of transcription, DNA-templated);GO:0006357(regulation of transcription by RNA polymerase II);GO:0007275(multicellular organism development);GO:0008134(transcription factor binding);GO:0035578(azurophil granule lumen);GO:004…	NA	NA	NA
1	ENSG00000104870	FCGRT	7.80049	4.80918	0.697772	3.70321e-294	1.60845e-289	Fc fragment of IgG receptor and transporter [Source:HGNC Symbol;Acc:HGNC:3621]	GO:0002416(IgG immunoglobulin transcytosis in epithelial cells mediated by FcRn immunoglobulin receptor);GO:0005615(extracellular space);GO:0005886(plasma membrane);GO:0006955(immune response);GO:0009897(external side of plasma membrane);GO:0016020(membrane);GO:0016021(integral component of membrane);GO:0019864(IgG binding);GO:0030881(beta-2-microglobulin binding)	NA	NA	NA
1	ENSG00000090013	BLVRB	6.75108	4.22848	0.674979	1.46799e-290	6.37609e-286	biliverdin reductase B [Source:HGNC Symbol;Acc:HGNC:1063]	GO:0004074(biliverdin reductase activity);GO:0005654(nucleoplasm);GO:0005737(cytoplasm);GO:0005829(cytosol);GO:0005886(plasma membrane);GO:0016491(oxidoreductase activity);GO:0042167(heme catabolic process);GO:0042602(riboflavin reductase (NADPH) activity);GO:0043195(terminal bouton);GO:0055114(oxidation-reduction process);GO:0070062(extracellular exosome)	00740(Riboflavin metabolism);00860(Porphyrin and chlorophyll metabolism)	NA	NA
1	ENSG00000138449	SLC40A1	3.22753	1.11984	1.52714	5.65849e-290	2.45771e-285	solute carrier family 40 member 1 [Source:HGNC Symbol;Acc:HGNC:10909]	GO:0002260(lymphocyte homeostasis);GO:0003158(endothelium development);GO:0005381(iron ion transmembrane transporter activity);GO:0005515(protein binding);GO:0005654(nucleoplasm);GO:0005737(cytoplasm);GO:0005829(cytosol);GO:0005886(plasma membrane);GO:0005887(integral component of plasma membrane);GO:0006811(ion transport);GO:0006826(iron ion transport);GO:0006879(cellular iron ion homeostasis);G…	04216(Ferroptosis);04978(Mineral absorption)	K14685	NA
1	ENSG00000184060	ADAP2	3.15753	2.00563	0.654738	1.76433e-277	7.66318e-273	ArfGAP with dual PH domains 2 [Source:HGNC Symbol;Acc:HGNC:16487]	GO:0005096(GTPase activator activity);GO:0005515(protein binding);GO:0005546(phosphatidylinositol-4,5-bisphosphate binding);GO:0005547(phosphatidylinositol-3,4,5-trisphosphate binding);GO:0005737(cytoplasm);GO:0005740(mitochondrial envelope);GO:0005886(plasma membrane);GO:0007507(heart development);GO:0016020(membrane);GO:0030674(protein binding, bridging);GO:0043325(phosphatidylinositol-3,4-bisp…	NA	NA	NA
1	ENSG00000105609	LILRB5	1.10007	0.633954	0.795141	1.97227e-266	8.56636e-262	leukocyte immunoglobulin like receptor B5 [Source:HGNC Symbol;Acc:HGNC:6609]	GO:0002250(adaptive immune response);GO:0002376(immune system process);GO:0004888(transmembrane signaling receptor activity);GO:0006952(defense response);GO:0007166(cell surface receptor signaling pathway);GO:0016020(membrane);GO:0016021(integral component of membrane)	04380(Osteoclast differentiation)	K06512	NA
1	ENSG00000173369	C1QB	15.2739	5.69282	1.42385	2.10438e-266	9.14017e-262	complement C1q B chain [Source:HGNC Symbol;Acc:HGNC:1242]	GO:0002376(immune system process);GO:0005515(protein binding);GO:0005576(extracellular region);GO:0005581(collagen trimer);GO:0005602(complement component C1 complex);GO:0005623(cell);GO:0006956(complement activation);GO:0006958(complement activation, classical pathway);GO:0030449(regulation of complement activation);GO:0042803(protein homodimerization activity);GO:0045087(innate immune response)…	04610(Complement and coagulation cascades);05020(Prion diseases);05133(Pertussis);05142(Chagas disease (American trypanosomiasis));05150(Staphylococcus aureus infection);05322(Systemic lupus erythematosus)	NA	NA
1	ENSG00000159189	C1QC	6.4623	2.8259	1.19334	1.96951e-265	8.55438e-261	complement C1q C chain [Source:HGNC Symbol;Acc:HGNC:1245]	GO:0002376(immune system process);GO:0005515(protein binding);GO:0005576(extracellular region);GO:0005581(collagen trimer);GO:0005615(extracellular space);GO:0005623(cell);GO:0006955(immune response);GO:0006956(complement activation);GO:0006958(complement activation, classical pathway);GO:0030449(regulation of complement activation);GO:0030853(negative regulation of granulocyte differentiation);G…	04610(Complement and coagulation cascades);05020(Prion diseases);05133(Pertussis);05142(Chagas disease (American trypanosomiasis));05150(Staphylococcus aureus infection);05322(Systemic lupus erythematosus)	NA	NA
1	ENSG00000178573	MAF	4.58881	2.44567	0.907891	6.75318e-263	2.93317e-258	MAF bZIP transcription factor [Source:HGNC Symbol;Acc:HGNC:6776]	GO:0000122(negative regulation of transcription by RNA polymerase II);GO:0000785(chromatin);GO:0000978(RNA polymerase II proximal promoter sequence-specific DNA binding);GO:0000981(DNA-binding transcription factor activity, RNA polymerase II-specific);GO:0001228(DNA-binding transcription activator activity, RNA polymerase II-specific);GO:0001816(cytokine production);GO:0002088(lens development in…	04658(Th1 and Th2 cell differentiation);05202(Transcriptional misregulation in cancer);05321(Inflammatory bowel disease (IBD))	K09035	NA
1	ENSG00000100292	HMOX1	9.38584	4.62184	1.02202	1.00357e-262	4.35892e-258	heme oxygenase 1 [Source:HGNC Symbol;Acc:HGNC:5013]	GO:0001525(angiogenesis);GO:0001666(response to hypoxia);GO:0001935(endothelial cell proliferation);GO:0002246(wound healing involved in inflammatory response);GO:0002686(negative regulation of leukocyte migration);GO:0004392(heme oxygenase (decyclizing) activity);GO:0004630(phospholipase D activity);GO:0005515(protein binding);GO:0005615(extracellular space);GO:0005634(nucleus);GO:0005730(nucleo…	00860(Porphyrin and chlorophyll metabolism);04066(HIF-1 signaling pathway);04216(Ferroptosis);04978(Mineral absorption);05200(Pathways in cancer);05206(MicroRNAs in cancer);05225(Hepatocellular carcinoma);05418(Fluid shear stress and atherosclerosis)	K00510	EC:1.14.14.18
1	ENSG00000109861	CTSC	3.68928	2.34866	0.651502	1.37928e-250	5.99077e-246	cathepsin C [Source:HGNC Symbol;Acc:HGNC:2528]	GO:0000139(Golgi membrane);GO:0001913(T cell mediated cytotoxicity);GO:0004197(cysteine-type endopeptidase activity);GO:0004252(serine-type endopeptidase activity);GO:0005515(protein binding);GO:0005576(extracellular region);GO:0005615(extracellular space);GO:0005654(nucleoplasm);GO:0005737(cytoplasm);GO:0005764(lysosome);GO:0005783(endoplasmic reticulum);GO:0005788(endoplasmic reticulum lumen);G…	04142(Lysosome);04210(Apoptosis)	NA	NA
1	ENSG00000082212	ME2	3.35391	1.96474	0.771507	9.37474e-248	4.07183e-243	malic enzyme 2 [Source:HGNC Symbol;Acc:HGNC:6984]	GO:0003824(catalytic activity);GO:0004470(malic enzyme activity);GO:0004471(malate dehydrogenase (decarboxylating) (NAD+) activity);GO:0004473(malate dehydrogenase (decarboxylating) (NADP+) activity);GO:0005739(mitochondrion);GO:0005759(mitochondrial matrix);GO:0006090(pyruvate metabolic process);GO:0006099(tricarboxylic acid cycle);GO:0006108(malate metabolic process);GO:0008152(metabolic proces…	00620(Pyruvate metabolism)	K00027	EC:1.1.1.38
1	ENSG00000124491	F13A1	7.46389	2.78272	1.42344	3.63787e-244	1.58007e-239	coagulation factor XIII A chain [Source:HGNC Symbol;Acc:HGNC:3531]	GO:0002576(platelet degranulation);GO:0003810(protein-glutamine gamma-glutamyltransferase activity);GO:0005576(extracellular region);GO:0005737(cytoplasm);GO:0007596(blood coagulation);GO:0007599(hemostasis);GO:0016740(transferase activity);GO:0016746(transferase activity, transferring acyl groups);GO:0018149(peptide cross-linking);GO:0019221(cytokine-mediated signaling pathway);GO:0031093(platel…	04610(Complement and coagulation cascades)	K03917	EC:2.3.2.13
1	ENSG00000110079	MS4A4A	3.28352	1.85397	0.824631	1.2446e-239	5.40578e-235	membrane spanning 4-domains A4A [Source:HGNC Symbol;Acc:HGNC:13371]	GO:0016020(membrane);GO:0016021(integral component of membrane)	NA	K22190	NA
1	ENSG00000183020	AP2A2	1.93959	1.24811	0.636	1.08207e-234	4.69988e-230	adaptor related protein complex 2 subunit alpha 2 [Source:HGNC Symbol;Acc:HGNC:562]	GO:0003674(molecular_function);GO:0005515(protein binding);GO:0005829(cytosol);GO:0005886(plasma membrane);GO:0005905(clathrin-coated pit);GO:0006886(intracellular protein transport);GO:0006897(endocytosis);GO:0008289(lipid binding);GO:0015031(protein transport);GO:0016020(membrane);GO:0016192(vesicle-mediated transport);GO:0019886(antigen processing and presentation of exogenous peptide antigen …	04144(Endocytosis);04721(Synaptic vesicle cycle);04961(Endocrine and other factor-regulated calcium reabsorption);05016(Huntington disease)	NA	NA
1	ENSG00000250722	SELENOP	9.53166	3.16086	1.59241	8.07088e-234	3.50551e-229	selenoprotein P [Source:HGNC Symbol;Acc:HGNC:10751]	GO:0001887(selenium compound metabolic process);GO:0002576(platelet degranulation);GO:0005576(extracellular region);GO:0005615(extracellular space);GO:0006979(response to oxidative stress);GO:0007420(brain development);GO:0007626(locomotory behavior);GO:0008430(selenium binding);GO:0009791(post-embryonic development);GO:0010269(response to selenium ion);GO:0016020(membrane);GO:0016021(integral co…	NA	NA	NA
1	ENSG00000136732	GYPC	2.65111	1.48045	0.840556	1.33495e-223	5.79823e-219	glycophorin C (Gerbich blood group) [Source:HGNC Symbol;Acc:HGNC:4704]	GO:0005515(protein binding);GO:0005886(plasma membrane);GO:0005887(integral component of plasma membrane);GO:0016020(membrane);GO:0016021(integral component of membrane);GO:0019897(extrinsic component of plasma membrane);GO:0030863(cortical cytoskeleton);GO:0050900(leukocyte migration)	05144(Malaria)	NA	NA
1	ENSG00000187474	FPR3	1.37661	0.933613	0.560225	2.33651e-221	1.01484e-216	formyl peptide receptor 3 [Source:HGNC Symbol;Acc:HGNC:3828]	GO:0002430(complement receptor mediated signaling pathway);GO:0004930(G protein-coupled receptor activity);GO:0004982(N-formyl peptide receptor activity);GO:0005886(plasma membrane);GO:0006935(chemotaxis);GO:0006954(inflammatory response);GO:0007165(signal transduction);GO:0007186(G protein-coupled receptor signaling pathway);GO:0007200(phospholipase C-activating G protein-coupled receptor signal…	04080(Neuroactive ligand-receptor interaction);05150(Staphylococcus aureus infection)	NA	NA
1	ENSG00000173372	C1QA	17.2385	7.23187	1.25319	7.43415e-220	3.22895e-215	complement C1q A chain [Source:HGNC Symbol;Acc:HGNC:1241]	GO:0001540(amyloid-beta binding);GO:0002376(immune system process);GO:0005515(protein binding);GO:0005576(extracellular region);GO:0005581(collagen trimer);GO:0005602(complement component C1 complex);GO:0005623(cell);GO:0006956(complement activation);GO:0006958(complement activation, classical pathway);GO:0007267(cell-cell signaling);GO:0007568(aging);GO:0010039(response to iron ion);GO:0016322(n…	04610(Complement and coagulation cascades);05020(Prion diseases);05133(Pertussis);05142(Chagas disease (American trypanosomiasis));05150(Staphylococcus aureus infection);05322(Systemic lupus erythematosus)	NA	NA
1	ENSG00000004799	PDK4	3.79342	2.13201	0.831287	3.79472e-215	1.6482e-210	pyruvate dehydrogenase kinase 4 [Source:HGNC Symbol;Acc:HGNC:8812]	GO:0000166(nucleotide binding);GO:0004672(protein kinase activity);GO:0004740(pyruvate dehydrogenase (acetyl-transferring) kinase activity);GO:0005524(ATP binding);GO:0005739(mitochondrion);GO:0005759(mitochondrial matrix);GO:0005975(carbohydrate metabolic process);GO:0006006(glucose metabolic process);GO:0006468(protein phosphorylation);GO:0006885(regulation of pH);GO:0008286(insulin receptor si…	NA	NA	NA
1	ENSG00000118257	NRP2	1.95524	1.3767	0.506128	9.66536e-215	4.19805e-210	neuropilin 2 [Source:HGNC Symbol;Acc:HGNC:8005]	GO:0001525(angiogenesis);GO:0001755(neural crest cell migration);GO:0001764(neuron migration);GO:0001938(positive regulation of endothelial cell proliferation);GO:0002116(semaphorin receptor complex);GO:0003148(outflow tract septum morphogenesis);GO:0005021(vascular endothelial growth factor-activated receptor activity);GO:0005515(protein binding);GO:0005576(extracellular region);GO:0005886(plasm…	NA	K06819	NA
1	ENSG00000151474	FRMD4A	0.662972	0.466212	0.507962	1.10791e-213	4.81208e-209	FERM domain containing 4A [Source:HGNC Symbol;Acc:HGNC:25491]	GO:0005737(cytoplasm);GO:0005856(cytoskeleton);GO:0005912(adherens junction);GO:0005923(bicellular tight junction);GO:0030054(cell junction);GO:0030674(protein binding, bridging);GO:0050709(negative regulation of protein secretion);GO:0050714(positive regulation of protein secretion);GO:0090162(establishment of epithelial cell polarity)	NA	NA	NA
1	ENSG00000160789	LMNA	5.65112	4.08939	0.466652	1.29289e-213	5.61556e-209	lamin A/C [Source:HGNC Symbol;Acc:HGNC:6636]	GO:0005198(structural molecule activity);GO:0005515(protein binding);GO:0005634(nucleus);GO:0005635(nuclear envelope);GO:0005638(lamin filament);GO:0005652(nuclear lamina);GO:0005654(nucleoplasm);GO:0005829(cytosol);GO:0005882(intermediate filament);GO:0006606(protein import into nucleus);GO:0006997(nucleus organization);GO:0006998(nuclear envelope organization);GO:0007084(mitotic nuclear envelop…	04210(Apoptosis);05410(Hypertrophic cardiomyopathy (HCM));05412(Arrhythmogenic right ventricular cardiomyopathy (ARVC));05414(Dilated cardiomyopathy (DCM))	K12641	NA
1	ENSG00000101160	CTSZ	8.30371	5.81802	0.513229	4.76245e-213	2.06852e-208	cathepsin Z [Source:HGNC Symbol;Acc:HGNC:2547]	GO:0000139(Golgi membrane);GO:0002003(angiotensin maturation);GO:0004180(carboxypeptidase activity);GO:0004197(cysteine-type endopeptidase activity);GO:0005515(protein binding);GO:0005576(extracellular region);GO:0005615(extracellular space);GO:0005764(lysosome);GO:0005783(endoplasmic reticulum);GO:0005788(endoplasmic reticulum lumen);GO:0005886(plasma membrane);GO:0006508(proteolysis);GO:0006888…	04142(Lysosome);04210(Apoptosis)	NA	NA
1	ENSG00000135821	GLUL	11.4321	7.62581	0.584126	1.2461e-211	5.41233e-207	glutamate-ammonia ligase [Source:HGNC Symbol;Acc:HGNC:4341]	GO:0000166(nucleotide binding);GO:0000287(magnesium ion binding);GO:0001504(neurotransmitter uptake);GO:0001525(angiogenesis);GO:0003824(catalytic activity);GO:0004356(glutamate-ammonia ligase activity);GO:0005515(protein binding);GO:0005524(ATP binding);GO:0005634(nucleus);GO:0005737(cytoplasm);GO:0005739(mitochondrion);GO:0005783(endoplasmic reticulum);GO:0005791(rough endoplasmic reticulum);GO…	00220(Arginine biosynthesis);00250(Alanine, aspartate and glutamate metabolism);00630(Glyoxylate and dicarboxylate metabolism);00910(Nitrogen metabolism);04217(Necroptosis);04724(Glutamatergic synapse);04727(GABAergic synapse)	K01915	EC:6.3.1.2
1	ENSG00000089220	PEBP1	1.64188	1.08146	0.602368	6.99359e-205	3.0376e-200	phosphatidylethanolamine binding protein 1 [Source:HGNC Symbol;Acc:HGNC:8630]	GO:0000165(MAPK cascade);GO:0000166(nucleotide binding);GO:0001505(regulation of neurotransmitter levels);GO:0002026(regulation of the force of heart contraction);GO:0003723(RNA binding);GO:0004867(serine-type endopeptidase inhibitor activity);GO:0005102(signaling receptor binding);GO:0005515(protein binding);GO:0005524(ATP binding);GO:0005615(extracellular space);GO:0005634(nucleus);GO:0005737(c…	NA	NA	NA
1	ENSG00000162745	OLFML2B	1.02765	0.732498	0.488456	2.30095e-195	9.99395e-191	olfactomedin like 2B [Source:HGNC Symbol;Acc:HGNC:24558]	GO:0005576(extracellular region);GO:0030198(extracellular matrix organization);GO:0031012(extracellular matrix);GO:0050840(extracellular matrix binding)	NA	NA	NA
1	ENSG00000134042	MRO	0.352125	0.275769	0.352626	4.37797e-194	1.90153e-189	maestro [Source:HGNC Symbol;Acc:HGNC:24121]	GO:0005634(nucleus);GO:0005730(nucleolus)	NA	NA	NA
1	ENSG00000158270	COLEC12	1.21423	0.748232	0.698485	5.60202e-194	2.43318e-189	collectin subfamily member 12 [Source:HGNC Symbol;Acc:HGNC:16016]	GO:0005044(scavenger receptor activity);GO:0005534(galactose binding);GO:0005581(collagen trimer);GO:0005615(extracellular space);GO:0005886(plasma membrane);GO:0006898(receptor-mediated endocytosis);GO:0006910(phagocytosis, recognition);GO:0006952(defense response);GO:0008329(signaling pattern recognition receptor activity);GO:0009756(carbohydrate mediated signaling);GO:0016020(membrane);GO:0016…	04145(Phagosome)	K10062	NA
1	ENSG00000171659	GPR34	1.40472	0.847508	0.728982	7.04622e-194	3.06046e-189	G protein-coupled receptor 34 [Source:HGNC Symbol;Acc:HGNC:4490]	GO:0004930(G protein-coupled receptor activity);GO:0005886(plasma membrane);GO:0005887(integral component of plasma membrane);GO:0007165(signal transduction);GO:0007186(G protein-coupled receptor signaling pathway);GO:0016020(membrane);GO:0016021(integral component of membrane);GO:0035589(G protein-coupled purinergic nucleotide receptor signaling pathway);GO:0045028(G protein-coupled purinergic n…	NA	NA	NA
1	ENSG00000114541	FRMD4B	1.71653	1.15253	0.574689	9.02161e-193	3.91844e-188	FERM domain containing 4B [Source:HGNC Symbol;Acc:HGNC:24886]	GO:0001726(ruffle);GO:0005615(extracellular space);GO:0005737(cytoplasm);GO:0005856(cytoskeleton);GO:0005912(adherens junction);GO:0005923(bicellular tight junction);GO:0030054(cell junction);GO:0090162(establishment of epithelial cell polarity)	NA	NA	NA
1	ENSG00000099250	NRP1	2.11782	1.48082	0.516185	8.0415e-190	3.49274e-185	neuropilin 1 [Source:HGNC Symbol;Acc:HGNC:8004]	GO:0001525(angiogenesis);GO:0001569(branching involved in blood vessel morphogenesis);GO:0001764(neuron migration);GO:0001938(positive regulation of endothelial cell proliferation);GO:0002040(sprouting angiogenesis);GO:0002042(cell migration involved in sprouting angiogenesis);GO:0002116(semaphorin receptor complex);GO:0003148(outflow tract septum morphogenesis);GO:0005021(vascular endothelial gr…	04360(Axon guidance);05166(Human T-cell leukemia virus 1 infection)	K06724	NA
1	ENSG00000088827	SIGLEC1	1.27074	0.807745	0.6537	1.8725e-186	8.13301e-182	sialic acid binding Ig like lectin 1 [Source:HGNC Symbol;Acc:HGNC:11127]	GO:0005576(extracellular region);GO:0005886(plasma membrane);GO:0006897(endocytosis);GO:0006954(inflammatory response);GO:0007155(cell adhesion);GO:0007160(cell-matrix adhesion);GO:0016020(membrane);GO:0016021(integral component of membrane);GO:0030246(carbohydrate binding);GO:0098609(cell-cell adhesion)	04514(Cell adhesion molecules (CAMs))	K06548	NA
1	ENSG00000119655	NPC2	10.7865	8.03001	0.425749	9.21891e-186	4.00414e-181	NPC intracellular cholesterol transporter 2 [Source:HGNC Symbol;Acc:HGNC:14537]	GO:0005515(protein binding);GO:0005576(extracellular region);GO:0005615(extracellular space);GO:0005623(cell);GO:0005764(lysosome);GO:0005783(endoplasmic reticulum);GO:0006629(lipid metabolic process);GO:0006869(lipid transport);GO:0008202(steroid metabolic process);GO:0008203(cholesterol metabolic process);GO:0009615(response to virus);GO:0015485(cholesterol binding);GO:0015914(phospholipid tran…	04142(Lysosome);04979(Cholesterol metabolism)	K13443	NA
1	ENSG00000111885	MAN1A1	2.01983	1.24744	0.695266	1.41722e-184	6.15555e-180	mannosidase alpha class 1A member 1 [Source:HGNC Symbol;Acc:HGNC:6821]	GO:0000139(Golgi membrane);GO:0003824(catalytic activity);GO:0004571(mannosyl-oligosaccharide 1,2-alpha-mannosidase activity);GO:0005509(calcium ion binding);GO:0005783(endoplasmic reticulum);GO:0005793(endoplasmic reticulum-Golgi intermediate compartment);GO:0005794(Golgi apparatus);GO:0005829(cytosol);GO:0006486(protein glycosylation);GO:0006491(N-glycan processing);GO:0008152(metabolic process…	00510(N-Glycan biosynthesis);04141(Protein processing in endoplasmic reticulum)	K01230	EC:3.2.1.113
1	ENSG00000085662	AKR1B1	1.28914	0.767655	0.747875	1.83784e-184	7.98246e-180	aldo-keto reductase family 1 member B [Source:HGNC Symbol;Acc:HGNC:381]	GO:0001523(retinoid metabolic process);GO:0001758(retinal dehydrogenase activity);GO:0001894(tissue homeostasis);GO:0003091(renal water homeostasis);GO:0004032(alditol:NADP+ 1-oxidoreductase activity);GO:0005615(extracellular space);GO:0005654(nucleoplasm);GO:0005737(cytoplasm);GO:0005829(cytosol);GO:0005975(carbohydrate metabolic process);GO:0005996(monosaccharide metabolic process);GO:0006061(s…	00040(Pentose and glucuronate interconversions);00051(Fructose and mannose metabolism);00052(Galactose metabolism);00561(Glycerolipid metabolism);00790(Folate biosynthesis)	NA	NA
1	ENSG00000135218	CD36	3.91871	2.50559	0.645227	1.16034e-183	5.03984e-179	CD36 molecule [Source:HGNC Symbol;Acc:HGNC:1663]	GO:0000122(negative regulation of transcription by RNA polymerase II);GO:0001540(amyloid-beta binding);GO:0001954(positive regulation of cell-matrix adhesion);GO:0002221(pattern recognition receptor signaling pathway);GO:0002224(toll-like receptor signaling pathway);GO:0002479(antigen processing and presentation of exogenous peptide antigen via MHC class I, TAP-dependent);GO:0002532(production of…	03320(PPAR signaling pathway);04145(Phagosome);04152(AMPK signaling pathway);04512(ECM-receptor interaction);04640(Hematopoietic cell lineage);04920(Adipocytokine signaling pathway);04931(Insulin resistance);04975(Fat digestion and absorption);04979(Cholesterol metabolism);05144(Malaria)	NA	NA
1	ENSG00000155657	TTN	1.63267	0.760323	1.10255	1.07929e-179	4.68779e-175	titin [Source:HGNC Symbol;Acc:HGNC:12403]	GO:0000166(nucleotide binding);GO:0000794(condensed nuclear chromosome);GO:0002020(protease binding);GO:0002576(platelet degranulation);GO:0003300(cardiac muscle hypertrophy);GO:0004672(protein kinase activity);GO:0004674(protein serine/threonine kinase activity);GO:0004713(protein tyrosine kinase activity);GO:0005509(calcium ion binding);GO:0005515(protein binding);GO:0005516(calmodulin binding)…	05410(Hypertrophic cardiomyopathy (HCM));05414(Dilated cardiomyopathy (DCM))	K12567	EC:2.7.11.1
1	ENSG00000179218	CALR	8.83078	5.87562	0.587799	1.56379e-172	6.79218e-168	calreticulin [Source:HGNC Symbol;Acc:HGNC:1455]	GO:0000122(negative regulation of transcription by RNA polymerase II);GO:0001669(acrosomal vesicle);GO:0001849(complement component C1q binding);GO:0002474(antigen processing and presentation of peptide antigen via MHC class I);GO:0002479(antigen processing and presentation of exogenous peptide antigen via MHC class I, TAP-dependent);GO:0002502(peptide antigen assembly with MHC class I protein co…	04141(Protein processing in endoplasmic reticulum);04145(Phagosome);04612(Antigen processing and presentation);05142(Chagas disease (American trypanosomiasis));05163(Human cytomegalovirus infection);05166(Human T-cell leukemia virus 1 infection);05168(Herpes simplex virus 1 infection);05169(Epstein-Barr virus infection);05170(Human immunodeficiency virus 1 infection)	NA	NA
1	ENSG00000197535	MYO5A	1.86414	1.30296	0.516719	3.52205e-172	1.52977e-167	myosin VA [Source:HGNC Symbol;Acc:HGNC:7602]	GO:0000146(microfilament motor activity);GO:0000166(nucleotide binding);GO:0001726(ruffle);GO:0001750(photoreceptor outer segment);GO:0003723(RNA binding);GO:0003774(motor activity);GO:0003779(actin binding);GO:0005509(calcium ion binding);GO:0005515(protein binding);GO:0005516(calmodulin binding);GO:0005524(ATP binding);GO:0005737(cytoplasm);GO:0005764(lysosome);GO:0005769(early endosome);GO:000…	NA	K10357	NA
1	ENSG00000166927	MS4A7	5.15897	3.37942	0.610308	4.04842e-170	1.75839e-165	membrane spanning 4-domains A7 [Source:HGNC Symbol;Acc:HGNC:13378]	GO:0016020(membrane);GO:0016021(integral component of membrane)	NA	K22191	NA
1	ENSG00000165457	FOLR2	1.96513	1.1381	0.788002	1.27617e-169	5.5429e-165	folate receptor beta [Source:HGNC Symbol;Acc:HGNC:3793]	GO:0005542(folic acid binding);GO:0005576(extracellular region);GO:0005886(plasma membrane);GO:0006898(receptor-mediated endocytosis);GO:0006954(inflammatory response);GO:0007155(cell adhesion);GO:0007342(fusion of sperm to egg plasma membrane involved in single fertilization);GO:0008144(drug binding);GO:0008284(positive regulation of cell population proliferation);GO:0009986(cell surface);GO:001…	01523(Antifolate resistance);04144(Endocytosis)	NA	NA
1	ENSG00000143344	RGL1	1.31188	0.957157	0.454808	8.99851e-166	3.90841e-161	ral guanine nucleotide dissociation stimulator like 1 [Source:HGNC Symbol;Acc:HGNC:30281]	GO:0005085(guanyl-nucleotide exchange factor activity);GO:0005515(protein binding);GO:0005575(cellular_component);GO:0005622(intracellular);GO:0005829(cytosol);GO:0007165(signal transduction);GO:0007264(small GTPase mediated signal transduction);GO:0008321(Ral guanyl-nucleotide exchange factor activity);GO:0019216(regulation of lipid metabolic process)	04014(Ras signaling pathway)	K17635	NA
1	ENSG00000038945	MSR1	3.88971	2.82197	0.462958	4.34705e-164	1.8881e-159	macrophage scavenger receptor 1 [Source:HGNC Symbol;Acc:HGNC:7376]	GO:0001540(amyloid-beta binding);GO:0005044(scavenger receptor activity);GO:0005515(protein binding);GO:0005581(collagen trimer);GO:0005829(cytosol);GO:0005886(plasma membrane);GO:0005887(integral component of plasma membrane);GO:0006897(endocytosis);GO:0006898(receptor-mediated endocytosis);GO:0006911(phagocytosis, engulfment);GO:0010629(negative regulation of gene expression);GO:0010744(positiv…	04145(Phagosome)	K06558	NA
1	ENSG00000087086	FTL	336.956	239.468	0.492728	4.17206e-159	1.81209e-154	ferritin light chain [Source:HGNC Symbol;Acc:HGNC:3999]	GO:0005506(iron ion binding);GO:0005515(protein binding);GO:0005576(extracellular region);GO:0005623(cell);GO:0005737(cytoplasm);GO:0005829(cytosol);GO:0006826(iron ion transport);GO:0006879(cellular iron ion homeostasis);GO:0006880(intracellular sequestering of iron ion);GO:0008043(intracellular ferritin complex);GO:0008198(ferrous iron binding);GO:0008199(ferric iron binding);GO:0016020(membran…	04216(Ferroptosis);04217(Necroptosis);04978(Mineral absorption)	K13625	NA
1	ENSG00000066294	CD84	2.24292	1.62691	0.463242	7.90382e-159	3.43294e-154	CD84 molecule [Source:HGNC Symbol;Acc:HGNC:1704]	GO:0002250(adaptive immune response);GO:0002376(immune system process);GO:0005515(protein binding);GO:0005886(plasma membrane);GO:0005887(integral component of plasma membrane);GO:0006914(autophagy);GO:0006952(defense response);GO:0007155(cell adhesion);GO:0007156(homophilic cell adhesion via plasma membrane adhesion molecules);GO:0016020(membrane);GO:0016021(integral component of membrane);GO:00…	NA	K06511	NA
1	ENSG00000120708	TGFBI	9.41317	6.27937	0.584062	1.8981e-157	8.24421e-153	transforming growth factor beta induced [Source:HGNC Symbol;Acc:HGNC:11771]	GO:0001525(angiogenesis);GO:0002062(chondrocyte differentiation);GO:0005178(integrin binding);GO:0005201(extracellular matrix structural constituent);GO:0005515(protein binding);GO:0005518(collagen binding);GO:0005576(extracellular region);GO:0005604(basement membrane);GO:0005615(extracellular space);GO:0005802(trans-Golgi network);GO:0005886(plasma membrane);GO:0007155(cell adhesion);GO:0007162(…	NA	K19519	NA
1	ENSG00000004399	PLXND1	1.62728	1.15475	0.49489	1.25031e-156	5.43058e-152	plexin D1 [Source:HGNC Symbol;Acc:HGNC:9107]	GO:0001525(angiogenesis);GO:0001569(branching involved in blood vessel morphogenesis);GO:0002116(semaphorin receptor complex);GO:0003151(outflow tract morphogenesis);GO:0003279(cardiac septum development);GO:0005515(protein binding);GO:0005886(plasma membrane);GO:0005887(integral component of plasma membrane);GO:0007162(negative regulation of cell adhesion);GO:0007165(signal transduction);GO:0007…	NA	K06822	NA
1	ENSG00000203747	FCGR3A	5.48805	4.16244	0.398864	2.91218e-156	1.26488e-151	Fc fragment of IgG receptor IIIa [Source:HGNC Symbol;Acc:HGNC:3619]	GO:0005576(extracellular region);GO:0005886(plasma membrane);GO:0006955(immune response);GO:0009897(external side of plasma membrane);GO:0016020(membrane);GO:0016021(integral component of membrane);GO:0019864(IgG binding);GO:0038096(Fc-gamma receptor signaling pathway involved in phagocytosis);GO:0050776(regulation of immune response);GO:0070062(extracellular exosome)	04145(Phagosome);04380(Osteoclast differentiation);04650(Natural killer cell mediated cytotoxicity);04666(Fc gamma R-mediated phagocytosis);05140(Leishmaniasis);05150(Staphylococcus aureus infection);05152(Tuberculosis);05322(Systemic lupus erythematosus)	NA	NA
1	ENSG00000090659	CD209	0.470528	0.346766	0.440318	5.58579e-155	2.42613e-150	CD209 molecule [Source:HGNC Symbol;Acc:HGNC:1641]	GO:0001618(virus receptor activity);GO:0002223(stimulatory C-type lectin receptor signaling pathway);GO:0002250(adaptive immune response);GO:0002376(immune system process);GO:0005515(protein binding);GO:0005537(mannose binding);GO:0005576(extracellular region);GO:0005737(cytoplasm);GO:0005886(plasma membrane);GO:0006897(endocytosis);GO:0007155(cell adhesion);GO:0007157(heterophilic cell-cell adhe…	04145(Phagosome);04625(C-type lectin receptor signaling pathway);05152(Tuberculosis);05162(Measles)	K06563	NA
1	ENSG00000110651	CD81	3.67847	2.80763	0.389755	2.00918e-153	8.72669e-149	CD81 molecule [Source:HGNC Symbol;Acc:HGNC:1701]	GO:0000187(activation of MAPK activity);GO:0001618(virus receptor activity);GO:0001771(immunological synapse formation);GO:0001772(immunological synapse);GO:0002250(adaptive immune response);GO:0002376(immune system process);GO:0002455(humoral immune response mediated by circulating immunoglobulin);GO:0002863(positive regulation of inflammatory response to antigenic stimulus);GO:0005178(integrin …	04662(B cell receptor signaling pathway);05144(Malaria);05160(Hepatitis C)	NA	NA
1	ENSG00000123416	TUBA1B	5.23488	3.80979	0.458446	2.74996e-152	1.19442e-147	tubulin alpha 1b [Source:HGNC Symbol;Acc:HGNC:18809]	GO:0000166(nucleotide binding);GO:0000226(microtubule cytoskeleton organization);GO:0000278(mitotic cell cycle);GO:0003725(double-stranded RNA binding);GO:0003924(GTPase activity);GO:0005198(structural molecule activity);GO:0005200(structural constituent of cytoskeleton);GO:0005515(protein binding);GO:0005525(GTP binding);GO:0005737(cytoplasm);GO:0005856(cytoskeleton);GO:0005874(microtubule);GO:0…	04145(Phagosome);04210(Apoptosis);04530(Tight junction);04540(Gap junction);05130(Pathogenic Escherichia coli infection)	K07374	NA
1	ENSG00000129515	SNX6	2.81228	1.99094	0.498293	4.42772e-151	1.92314e-146	sorting nexin 6 [Source:HGNC Symbol;Acc:HGNC:14970]	GO:0005515(protein binding);GO:0005623(cell);GO:0005634(nucleus);GO:0005737(cytoplasm);GO:0005764(lysosome);GO:0005768(endosome);GO:0005769(early endosome);GO:0005829(cytosol);GO:0006886(intracellular protein transport);GO:0007175(negative regulation of epidermal growth factor-activated receptor activity);GO:0008289(lipid binding);GO:0015031(protein transport);GO:0016020(membrane);GO:0016241(regu…	04144(Endocytosis)	K17920	NA
1	ENSG00000164687	FABP5	14.6733	8.58615	0.773115	1.12982e-148	4.90724e-144	fatty acid binding protein 5 [Source:HGNC Symbol;Acc:HGNC:3560]	GO:0001972(retinoic acid binding);GO:0005504(fatty acid binding);GO:0005515(protein binding);GO:0005576(extracellular region);GO:0005615(extracellular space);GO:0005634(nucleus);GO:0005654(nucleoplasm);GO:0005737(cytoplasm);GO:0005829(cytosol);GO:0005886(plasma membrane);GO:0006006(glucose metabolic process);GO:0006629(lipid metabolic process);GO:0006656(phosphatidylcholine biosynthetic process);…	03320(PPAR signaling pathway)	K08754	NA
1	ENSG00000205726	ITSN1	0.854207	0.618087	0.466775	2.09777e-145	9.11145e-141	intersectin 1 [Source:HGNC Symbol;Acc:HGNC:6183]	GO:0005085(guanyl-nucleotide exchange factor activity);GO:0005089(Rho guanyl-nucleotide exchange factor activity);GO:0005509(calcium ion binding);GO:0005515(protein binding);GO:0005634(nucleus);GO:0005635(nuclear envelope);GO:0005737(cytoplasm);GO:0005768(endosome);GO:0005829(cytosol);GO:0005886(plasma membrane);GO:0005905(clathrin-coated pit);GO:0006887(exocytosis);GO:0006897(endocytosis);GO:000…	NA	K20045	NA
1	ENSG00000155660	PDIA4	1.87405	1.29715	0.530808	1.30358e-144	5.66195e-140	protein disulfide isomerase family A member 4 [Source:HGNC Symbol;Acc:HGNC:30167]	GO:0003723(RNA binding);GO:0003756(protein disulfide isomerase activity);GO:0005515(protein binding);GO:0005615(extracellular space);GO:0005623(cell);GO:0005783(endoplasmic reticulum);GO:0005788(endoplasmic reticulum lumen);GO:0006457(protein folding);GO:0009306(protein secretion);GO:0009986(cell surface);GO:0015037(peptide disulfide oxidoreductase activity);GO:0016853(isomerase activity);GO:0034…	04141(Protein processing in endoplasmic reticulum);04918(Thyroid hormone synthesis);05110(Vibrio cholerae infection)	K09582	EC:5.3.4.1
1	ENSG00000105223	PLD3	2.52937	1.88196	0.426546	6.77284e-141	2.94171e-136	phospholipase D family member 3 [Source:HGNC Symbol;Acc:HGNC:17158]	GO:0003824(catalytic activity);GO:0004630(phospholipase D activity);GO:0005515(protein binding);GO:0005783(endoplasmic reticulum);GO:0005789(endoplasmic reticulum membrane);GO:0006629(lipid metabolic process);GO:0016020(membrane);GO:0016021(integral component of membrane);GO:0016042(lipid catabolic process);GO:0016787(hydrolase activity);GO:0070062(extracellular exosome);GO:0070290(N-acylphosphat…	00564(Glycerophospholipid metabolism);00565(Ether lipid metabolism)	K16860	EC:3.1.4.4
1	ENSG00000110077	MS4A6A	6.16498	3.83047	0.686575	7.98489e-141	3.46816e-136	membrane spanning 4-domains A6A [Source:HGNC Symbol;Acc:HGNC:13375]	GO:0016020(membrane);GO:0016021(integral component of membrane)	NA	K22191	NA
1	ENSG00000277443	MARCKS	7.36246	5.40926	0.444757	1.66052e-139	7.21232e-135	myristoylated alanine rich protein kinase C substrate [Source:HGNC Symbol;Acc:HGNC:6759]	GO:0003779(actin binding);GO:0005080(protein kinase C binding);GO:0005516(calmodulin binding);GO:0005737(cytoplasm);GO:0005813(centrosome);GO:0005856(cytoskeleton);GO:0005886(plasma membrane);GO:0005925(focal adhesion);GO:0005938(cell cortex);GO:0015629(actin cytoskeleton);GO:0016020(membrane);GO:0032432(actin filament bundle);GO:0042585(germinal vesicle);GO:0042802(identical protein binding);GO:…	04666(Fc gamma R-mediated phagocytosis);05206(MicroRNAs in cancer)	K12561	NA
1	ENSG00000017427	IGF1	0.731685	0.506656	0.530216	1.4335e-137	6.22627e-133	insulin like growth factor 1 [Source:HGNC Symbol;Acc:HGNC:5464]	GO:0000187(activation of MAPK activity);GO:0001501(skeletal system development);GO:0001775(cell activation);GO:0002576(platelet degranulation);GO:0005158(insulin receptor binding);GO:0005159(insulin-like growth factor receptor binding);GO:0005178(integrin binding);GO:0005179(hormone activity);GO:0005515(protein binding);GO:0005576(extracellular region);GO:0005615(extracellular space);GO:0007165(s…	01521(EGFR tyrosine kinase inhibitor resistance);01522(Endocrine resistance);04010(MAPK signaling pathway);04014(Ras signaling pathway);04015(Rap1 signaling pathway);04066(HIF-1 signaling pathway);04068(FoxO signaling pathway);04114(Oocyte meiosis);04115(p53 signaling pathway);04150(mTOR signaling pathway);04151(PI3K-Akt signaling pathway);04152(AMPK signaling pathway);04211(Longevity regulating …	NA	NA
1	ENSG00000168961	LGALS9	2.43701	1.85282	0.395386	2.10067e-137	9.12403e-133	galectin 9 [Source:HGNC Symbol;Acc:HGNC:6570]	GO:0002376(immune system process);GO:0002519(natural killer cell tolerance induction);GO:0005534(galactose binding);GO:0005576(extracellular region);GO:0005615(extracellular space);GO:0005634(nucleus);GO:0005737(cytoplasm);GO:0005829(cytosol);GO:0006935(chemotaxis);GO:0006954(inflammatory response);GO:0007565(female pregnancy);GO:0010628(positive regulation of gene expression);GO:0010629(negative…	NA	K10093	NA
1	ENSG00000135678	CPM	3.23434	2.20203	0.55464	1.73589e-135	7.53968e-131	carboxypeptidase M [Source:HGNC Symbol;Acc:HGNC:2311]	GO:0004180(carboxypeptidase activity);GO:0004181(metallocarboxypeptidase activity);GO:0005576(extracellular region);GO:0005615(extracellular space);GO:0005886(plasma membrane);GO:0006508(proteolysis);GO:0006518(peptide metabolic process);GO:0008233(peptidase activity);GO:0008237(metallopeptidase activity);GO:0008270(zinc ion binding);GO:0009653(anatomical structure morphogenesis);GO:0009986(cell …	NA	K01296	EC:3.4.17.12
1	ENSG00000153208	MERTK	1.58832	1.16358	0.448931	4.24211e-135	1.84252e-130	MER proto-oncogene, tyrosine kinase [Source:HGNC Symbol;Acc:HGNC:7027]	GO:0000166(nucleotide binding);GO:0001750(photoreceptor outer segment);GO:0001779(natural killer cell differentiation);GO:0001818(negative regulation of cytokine production);GO:0004672(protein kinase activity);GO:0004713(protein tyrosine kinase activity);GO:0004714(transmembrane receptor protein tyrosine kinase activity);GO:0005515(protein binding);GO:0005524(ATP binding);GO:0005615(extracellular…	NA	K05117	EC:2.7.10.1
1	ENSG00000197093	GAL3ST4	0.343978	0.279764	0.298109	5.4491e-133	2.36676e-128	galactose-3-O-sulfotransferase 4 [Source:HGNC Symbol;Acc:HGNC:24145]	GO:0001733(galactosylceramide sulfotransferase activity);GO:0005794(Golgi apparatus);GO:0006790(sulfur compound metabolic process);GO:0007267(cell-cell signaling);GO:0009100(glycoprotein metabolic process);GO:0009247(glycolipid biosynthetic process);GO:0009311(oligosaccharide metabolic process);GO:0016020(membrane);GO:0016021(integral component of membrane);GO:0016740(transferase activity);GO:003…	NA	K09677	EC:2.8.2.-
1	ENSG00000170873	MTSS1	2.3594	1.85298	0.348574	5.71289e-132	2.48134e-127	MTSS1, I-BAR domain containing [Source:HGNC Symbol;Acc:HGNC:20443]	GO:0001726(ruffle);GO:0003779(actin binding);GO:0003785(actin monomer binding);GO:0005102(signaling receptor binding);GO:0005515(protein binding);GO:0005737(cytoplasm);GO:0005856(cytoskeleton);GO:0007009(plasma membrane organization);GO:0007155(cell adhesion);GO:0007169(transmembrane receptor protein tyrosine kinase signaling pathway);GO:0015629(actin cytoskeleton);GO:0030035(microspike assembly)…	NA	K20128	NA
1	ENSG00000196230	TUBB	3.4542	2.62254	0.397387	2.68708e-130	1.16711e-125	tubulin beta class I [Source:HGNC Symbol;Acc:HGNC:20778]	GO:0000086(G2/M transition of mitotic cell cycle);GO:0000166(nucleotide binding);GO:0000226(microtubule cytoskeleton organization);GO:0000278(mitotic cell cycle);GO:0003924(GTPase activity);GO:0005198(structural molecule activity);GO:0005200(structural constituent of cytoskeleton);GO:0005515(protein binding);GO:0005525(GTP binding);GO:0005576(extracellular region);GO:0005634(nucleus);GO:0005641(n…	04145(Phagosome);04540(Gap junction);05130(Pathogenic Escherichia coli infection)	K07375	NA
1	ENSG00000069275	NUCKS1	2.32868	1.825	0.351616	6.56853e-130	2.85298e-125	nuclear casein kinase and cyclin dependent kinase substrate 1 [Source:HGNC Symbol;Acc:HGNC:29923]	GO:0000724(double-strand break repair via homologous recombination);GO:0000785(chromatin);GO:0000790(nuclear chromatin);GO:0001228(DNA-binding transcription activator activity, RNA polymerase II-specific);GO:0001678(cellular glucose homeostasis);GO:0003682(chromatin binding);GO:0003690(double-stranded DNA binding);GO:0003697(single-stranded DNA binding);GO:0003723(RNA binding);GO:0005634(nucleus)…	NA	NA	NA
1	ENSG00000065833	ME1	0.435033	0.338412	0.362345	1.4321e-129	6.22018e-125	malic enzyme 1 [Source:HGNC Symbol;Acc:HGNC:6983]	GO:0004470(malic enzyme activity);GO:0004471(malate dehydrogenase (decarboxylating) (NAD+) activity);GO:0004473(malate dehydrogenase (decarboxylating) (NADP+) activity);GO:0005737(cytoplasm);GO:0005739(mitochondrion);GO:0005829(cytosol);GO:0005975(carbohydrate metabolic process);GO:0006090(pyruvate metabolic process);GO:0006108(malate metabolic process);GO:0006741(NADP biosynthetic process);GO:00…	00620(Pyruvate metabolism);03320(PPAR signaling pathway)	K00029	EC:1.1.1.40
1	ENSG00000146376	ARHGAP18	3.37748	2.66733	0.340551	1.52677e-129	6.63135e-125	Rho GTPase activating protein 18 [Source:HGNC Symbol;Acc:HGNC:21035]	GO:0005096(GTPase activator activity);GO:0005737(cytoplasm);GO:0005829(cytosol);GO:0005886(plasma membrane);GO:0007165(signal transduction);GO:0007264(small GTPase mediated signal transduction);GO:0008360(regulation of cell shape);GO:0016607(nuclear speck);GO:0030833(regulation of actin filament polymerization);GO:0032956(regulation of actin cytoskeleton organization);GO:0043547(positive regulati…	NA	K20639	NA
1	ENSG00000175899	A2M	1.60615	1.0334	0.636208	4.70225e-129	2.04237e-124	alpha-2-macroglobulin [Source:HGNC Symbol;Acc:HGNC:7]	GO:0001869(negative regulation of complement activation, lectin pathway);GO:0002020(protease binding);GO:0002576(platelet degranulation);GO:0004866(endopeptidase inhibitor activity);GO:0004867(serine-type endopeptidase inhibitor activity);GO:0005102(signaling receptor binding);GO:0005515(protein binding);GO:0005576(extracellular region);GO:0005615(extracellular space);GO:0005829(cytosol);GO:00075…	04610(Complement and coagulation cascades)	NA	NA
1	ENSG00000100280	AP1B1	1.41186	1.07582	0.39215	1.19969e-127	5.21074e-123	adaptor related protein complex 1 subunit beta 1 [Source:HGNC Symbol;Acc:HGNC:554]	GO:0000139(Golgi membrane);GO:0005215(transporter activity);GO:0005515(protein binding);GO:0005765(lysosomal membrane);GO:0005794(Golgi apparatus);GO:0005829(cytosol);GO:0006886(intracellular protein transport);GO:0007368(determination of left/right symmetry);GO:0007507(heart development);GO:0015031(protein transport);GO:0016020(membrane);GO:0016192(vesicle-mediated transport);GO:0019886(antigen …	04142(Lysosome);05170(Human immunodeficiency virus 1 infection)	NA	NA
1	ENSG00000141655	TNFRSF11A	0.757218	0.581709	0.380411	1.62402e-127	7.05375e-123	TNF receptor superfamily member 11a [Source:HGNC Symbol;Acc:HGNC:11908]	GO:0001503(ossification);GO:0002250(adaptive immune response);GO:0002548(monocyte chemotaxis);GO:0004888(transmembrane signaling receptor activity);GO:0005031(tumor necrosis factor-activated receptor activity);GO:0005515(protein binding);GO:0005829(cytosol);GO:0005886(plasma membrane);GO:0007165(signal transduction);GO:0007267(cell-cell signaling);GO:0007275(multicellular organism development);GO…	04060(Cytokine-cytokine receptor interaction);04064(NF-kappa B signaling pathway);04380(Osteoclast differentiation);04917(Prolactin signaling pathway);05323(Rheumatoid arthritis)	K05147	NA
1	ENSG00000133313	CNDP2	1.63973	1.25957	0.380518	5.5828e-127	2.42483e-122	carnosine dipeptidase 2 [Source:HGNC Symbol;Acc:HGNC:24437]	GO:0004180(carboxypeptidase activity);GO:0005654(nucleoplasm);GO:0005737(cytoplasm);GO:0005829(cytosol);GO:0006508(proteolysis);GO:0006750(glutathione biosynthetic process);GO:0008233(peptidase activity);GO:0008237(metallopeptidase activity);GO:0016787(hydrolase activity);GO:0016805(dipeptidase activity);GO:0046872(metal ion binding);GO:0070062(extracellular exosome);GO:0102008(cytosolic dipeptid…	00330(Arginine and proline metabolism);00340(Histidine metabolism);00410(beta-Alanine metabolism)	K08660	EC:3.4.13.18
1	ENSG00000166598	HSP90B1	9.89022	6.91028	0.517258	9.74941e-127	4.23456e-122	heat shock protein 90 beta family member 1 [Source:HGNC Symbol;Acc:HGNC:12028]	GO:0000166(nucleotide binding);GO:0001666(response to hypoxia);GO:0002224(toll-like receptor signaling pathway);GO:0003723(RNA binding);GO:0005509(calcium ion binding);GO:0005515(protein binding);GO:0005524(ATP binding);GO:0005576(extracellular region);GO:0005634(nucleus);GO:0005783(endoplasmic reticulum);GO:0005788(endoplasmic reticulum lumen);GO:0005789(endoplasmic reticulum membrane);GO:000582…	04141(Protein processing in endoplasmic reticulum);04151(PI3K-Akt signaling pathway);04657(IL-17 signaling pathway);04915(Estrogen signaling pathway);04918(Thyroid hormone synthesis);05200(Pathways in cancer);05215(Prostate cancer);05418(Fluid shear stress and atherosclerosis)	K09487	NA
1	ENSG00000171227	TMEM37	0.436909	0.340842	0.358232	1.72661e-125	7.49934e-121	transmembrane protein 37 [Source:HGNC Symbol;Acc:HGNC:18216]	GO:0005244(voltage-gated ion channel activity);GO:0005262(calcium channel activity);GO:0006811(ion transport);GO:0006816(calcium ion transport);GO:0016020(membrane);GO:0016021(integral component of membrane);GO:0034220(ion transmembrane transport);GO:0034765(regulation of ion transmembrane transport);GO:0070588(calcium ion transmembrane transport)	NA	NA	NA
1	ENSG00000106605	BLVRA	1.40412	1.08735	0.368854	2.85631e-125	1.24061e-120	biliverdin reductase A [Source:HGNC Symbol;Acc:HGNC:1062]	GO:0004074(biliverdin reductase activity);GO:0005515(protein binding);GO:0005737(cytoplasm);GO:0005829(cytosol);GO:0008270(zinc ion binding);GO:0016491(oxidoreductase activity);GO:0042167(heme catabolic process);GO:0046872(metal ion binding);GO:0055114(oxidation-reduction process);GO:0070062(extracellular exosome)	00860(Porphyrin and chlorophyll metabolism)	NA	NA
1	ENSG00000166033	HTRA1	1.31676	0.957523	0.459613	5.33978e-125	2.31928e-120	HtrA serine peptidase 1 [Source:HGNC Symbol;Acc:HGNC:9476]	GO:0001890(placenta development);GO:0004252(serine-type endopeptidase activity);GO:0005515(protein binding);GO:0005520(insulin-like growth factor binding);GO:0005576(extracellular region);GO:0005615(extracellular space);GO:0005737(cytoplasm);GO:0005829(cytosol);GO:0005886(plasma membrane);GO:0006508(proteolysis);GO:0008233(peptidase activity);GO:0008236(serine-type peptidase activity);GO:0016020(…	NA	NA	NA
1	ENSG00000204136	GGTA1P	1.55494	0.982279	0.662654	7.63579e-125	3.31653e-120	glycoprotein, alpha-galactosyltransferase 1 pseudogene [Source:HGNC Symbol;Acc:HGNC:4253]	NA	NA	NA	NA
1	ENSG00000178695	KCTD12	4.87447	3.77194	0.369939	1.00342e-124	4.35828e-120	potassium channel tetramerization domain containing 12 [Source:HGNC Symbol;Acc:HGNC:14678]	GO:0003723(RNA binding);GO:0005515(protein binding);GO:0005886(plasma membrane);GO:0016020(membrane);GO:0030054(cell junction);GO:0042734(presynaptic membrane);GO:0042802(identical protein binding);GO:0045202(synapse);GO:0045211(postsynaptic membrane);GO:0051260(protein homooligomerization)	NA	K21918	NA
1	ENSG00000166278	C2	0.689129	0.500696	0.460838	1.74088e-123	7.56132e-119	complement C2 [Source:HGNC Symbol;Acc:HGNC:1248]	GO:0002376(immune system process);GO:0004252(serine-type endopeptidase activity);GO:0005515(protein binding);GO:0005576(extracellular region);GO:0005615(extracellular space);GO:0006508(proteolysis);GO:0006956(complement activation);GO:0006958(complement activation, classical pathway);GO:0007584(response to nutrient);GO:0008233(peptidase activity);GO:0008236(serine-type peptidase activity);GO:0016…	04610(Complement and coagulation cascades);05133(Pertussis);05150(Staphylococcus aureus infection);05322(Systemic lupus erythematosus)	NA	NA
1	ENSG00000166068	SPRED1	0.957088	0.728025	0.394663	1.02538e-122	4.45365e-118	sprouty related EVH1 domain containing 1 [Source:HGNC Symbol;Acc:HGNC:20249]	GO:0000165(MAPK cascade);GO:0000188(inactivation of MAPK activity);GO:0005173(stem cell factor receptor binding);GO:0005515(protein binding);GO:0005634(nucleus);GO:0005829(cytosol);GO:0005886(plasma membrane);GO:0005901(caveola);GO:0006469(negative regulation of protein kinase activity);GO:0007275(multicellular organism development);GO:0008543(fibroblast growth factor receptor signaling pathway);…	NA	K04703	NA
1	ENSG00000122705	CLTA	3.92836	3.02105	0.37888	1.19268e-122	5.18028e-118	clathrin light chain A [Source:HGNC Symbol;Acc:HGNC:2090]	GO:0003674(molecular_function);GO:0005198(structural molecule activity);GO:0005515(protein binding);GO:0005737(cytoplasm);GO:0005819(spindle);GO:0005829(cytosol);GO:0005856(cytoskeleton);GO:0005886(plasma membrane);GO:0005905(clathrin-coated pit);GO:0006886(intracellular protein transport);GO:0006897(endocytosis);GO:0007049(cell cycle);GO:0016020(membrane);GO:0016192(vesicle-mediated transport);G…	04142(Lysosome);04144(Endocytosis);04721(Synaptic vesicle cycle);04961(Endocrine and other factor-regulated calcium reabsorption);05016(Huntington disease);05100(Bacterial invasion of epithelial cells)	NA	NA
1	ENSG00000118640	VAMP8	4.9596	3.94918	0.32867	3.94445e-122	1.71323e-117	vesicle associated membrane protein 8 [Source:HGNC Symbol;Acc:HGNC:12647]	GO:0002479(antigen processing and presentation of exogenous peptide antigen via MHC class I, TAP-dependent);GO:0005515(protein binding);GO:0005737(cytoplasm);GO:0005764(lysosome);GO:0005765(lysosomal membrane);GO:0005768(endosome);GO:0005769(early endosome);GO:0005829(cytosol);GO:0005886(plasma membrane);GO:0006892(post-Golgi vesicle-mediated transport);GO:0006914(autophagy);GO:0015031(protein tr…	04130(SNARE interactions in vesicular transport);04140(Autophagy - animal);04611(Platelet activation)	K08512	NA
1	ENSG00000118855	MFSD1	3.1534	2.47718	0.348213	3.94264e-120	1.71245e-115	major facilitator superfamily domain containing 1 [Source:HGNC Symbol;Acc:HGNC:25874]	GO:0016020(membrane);GO:0016021(integral component of membrane);GO:0055085(transmembrane transport)	NA	NA	NA
1	ENSG00000151914	DST	0.84126	0.63926	0.396148	3.08592e-118	1.34034e-113	dystonin [Source:HGNC Symbol;Acc:HGNC:1090]	GO:0002162(dystroglycan binding);GO:0003779(actin binding);GO:0005178(integrin binding);GO:0005198(structural molecule activity);GO:0005509(calcium ion binding);GO:0005515(protein binding);GO:0005604(basement membrane);GO:0005634(nucleus);GO:0005635(nuclear envelope);GO:0005737(cytoplasm);GO:0005783(endoplasmic reticulum);GO:0005789(endoplasmic reticulum membrane);GO:0005829(cytosol);GO:0005856(c…	NA	NA	NA
1	ENSG00000140092	FBLN5	0.623754	0.458586	0.443786	1.36805e-117	5.942e-113	fibulin 5 [Source:HGNC Symbol;Acc:HGNC:3602]	GO:0001558(regulation of cell growth);GO:0005178(integrin binding);GO:0005509(calcium ion binding);GO:0005515(protein binding);GO:0005576(extracellular region);GO:0005615(extracellular space);GO:0007155(cell adhesion);GO:0007160(cell-matrix adhesion);GO:0008022(protein C-terminus binding);GO:0030023(extracellular matrix constituent conferring elasticity);GO:0030198(extracellular matrix organizati…	NA	K17340	NA
1	ENSG00000141367	CLTC	2.83413	2.2519	0.331764	4.51722e-117	1.96201e-112	clathrin heavy chain [Source:HGNC Symbol;Acc:HGNC:2092]	GO:0000278(mitotic cell cycle);GO:0001649(osteoblast differentiation);GO:0003723(RNA binding);GO:0003725(double-stranded RNA binding);GO:0005198(structural molecule activity);GO:0005515(protein binding);GO:0005623(cell);GO:0005737(cytoplasm);GO:0005764(lysosome);GO:0005768(endosome);GO:0005819(spindle);GO:0005829(cytosol);GO:0005856(cytoskeleton);GO:0005886(plasma membrane);GO:0005905(clathrin-co…	04142(Lysosome);04144(Endocytosis);04721(Synaptic vesicle cycle);04961(Endocrine and other factor-regulated calcium reabsorption);05016(Huntington disease);05100(Bacterial invasion of epithelial cells)	NA	NA
1	ENSG00000107562	CXCL12	0.44865	0.336997	0.412852	1.23721e-116	5.37371e-112	C-X-C motif chemokine ligand 12 [Source:HGNC Symbol;Acc:HGNC:10672]	GO:0001666(response to hypoxia);GO:0001764(neuron migration);GO:0001938(positive regulation of endothelial cell proliferation);GO:0005102(signaling receptor binding);GO:0005125(cytokine activity);GO:0005178(integrin binding);GO:0005515(protein binding);GO:0005576(extracellular region);GO:0005615(extracellular space);GO:0005634(nucleus);GO:0005737(cytoplasm);GO:0005886(plasma membrane);GO:0006874(…	04060(Cytokine-cytokine receptor interaction);04062(Chemokine signaling pathway);04064(NF-kappa B signaling pathway);04360(Axon guidance);04670(Leukocyte transendothelial migration);04672(Intestinal immune network for IgA production);04810(Regulation of actin cytoskeleton);05163(Human cytomegalovirus infection);05200(Pathways in cancer);05323(Rheumatoid arthritis)	NA	NA
1	ENSG00000106211	HSPB1	2.959	2.23375	0.405641	4.16977e-115	1.8111e-110	heat shock protein family B (small) member 1 [Source:HGNC Symbol;Acc:HGNC:5246]	GO:0000502(proteasome complex);GO:0001895(retina homeostasis);GO:0001932(regulation of protein phosphorylation);GO:0003723(RNA binding);GO:0005080(protein kinase C binding);GO:0005515(protein binding);GO:0005615(extracellular space);GO:0005634(nucleus);GO:0005737(cytoplasm);GO:0005819(spindle);GO:0005829(cytosol);GO:0005856(cytoskeleton);GO:0005886(plasma membrane);GO:0005925(focal adhesion);GO:0…	04010(MAPK signaling pathway);04370(VEGF signaling pathway);05146(Amoebiasis)	K04455	NA
1	ENSG00000080546	SESN1	0.968163	0.6933	0.481771	5.52666e-115	2.40045e-110	sestrin 1 [Source:HGNC Symbol;Acc:HGNC:21595]	GO:0001650(fibrillar center);GO:0005515(protein binding);GO:0005634(nucleus);GO:0005737(cytoplasm);GO:0005829(cytosol);GO:0016239(positive regulation of macroautophagy);GO:0016491(oxidoreductase activity);GO:0016684(oxidoreductase activity, acting on peroxide as acceptor);GO:0031932(TORC2 complex);GO:0034198(cellular response to amino acid starvation);GO:0042149(cellular response to glucose starv…	04115(p53 signaling pathway);04211(Longevity regulating pathway)	K10141	NA
1	ENSG00000019169	MARCO	6.73178	4.48945	0.584449	5.17847e-114	2.24922e-109	macrophage receptor with collagenous structure [Source:HGNC Symbol;Acc:HGNC:6895]	GO:0001540(amyloid-beta binding);GO:0001664(G protein-coupled receptor binding);GO:0001934(positive regulation of protein phosphorylation);GO:0002221(pattern recognition receptor signaling pathway);GO:0002376(immune system process);GO:0004888(transmembrane signaling receptor activity);GO:0005044(scavenger receptor activity);GO:0005581(collagen trimer);GO:0005737(cytoplasm);GO:0005886(plasma membr…	04145(Phagosome)	K13884	NA
1	ENSG00000082781	ITGB5	0.689257	0.547588	0.331951	1.31184e-112	5.69784e-108	integrin subunit beta 5 [Source:HGNC Symbol;Acc:HGNC:6160]	GO:0001618(virus receptor activity);GO:0002479(antigen processing and presentation of exogenous peptide antigen via MHC class I, TAP-dependent);GO:0005178(integrin binding);GO:0005515(protein binding);GO:0005886(plasma membrane);GO:0005925(focal adhesion);GO:0006936(muscle contraction);GO:0007155(cell adhesion);GO:0007160(cell-matrix adhesion);GO:0007179(transforming growth factor beta receptor s…	04145(Phagosome);04151(PI3K-Akt signaling pathway);04510(Focal adhesion);04512(ECM-receptor interaction);04810(Regulation of actin cytoskeleton);05165(Human papillomavirus infection);05205(Proteoglycans in cancer);05410(Hypertrophic cardiomyopathy (HCM));05412(Arrhythmogenic right ventricular cardiomyopathy (ARVC));05414(Dilated cardiomyopathy (DCM))	K06588	NA
1	ENSG00000179163	FUCA1	0.785138	0.577191	0.443898	7.76088e-112	3.37086e-107	alpha-L-fucosidase 1 [Source:HGNC Symbol;Acc:HGNC:4006]	GO:0004560(alpha-L-fucosidase activity);GO:0005576(extracellular region);GO:0005737(cytoplasm);GO:0005764(lysosome);GO:0005975(carbohydrate metabolic process);GO:0006004(fucose metabolic process);GO:0006027(glycosaminoglycan catabolic process);GO:0008152(metabolic process);GO:0016139(glycoside catabolic process);GO:0016787(hydrolase activity);GO:0016798(hydrolase activity, acting on glycosyl bond…	00511(Other glycan degradation);04142(Lysosome)	K01206	EC:3.2.1.51
1	ENSG00000163710	PCOLCE2	0.613166	0.488261	0.328624	1.36106e-111	5.91164e-107	procollagen C-endopeptidase enhancer 2 [Source:HGNC Symbol;Acc:HGNC:8739]	GO:0005515(protein binding);GO:0005518(collagen binding);GO:0005576(extracellular region);GO:0008201(heparin binding);GO:0010952(positive regulation of peptidase activity);GO:0016504(peptidase activator activity);GO:1990830(cellular response to leukemia inhibitory factor)	NA	NA	NA
1	ENSG00000196141	SPATS2L	0.754548	0.565154	0.41697	1.94698e-111	8.45652e-107	spermatogenesis associated serine rich 2 like [Source:HGNC Symbol;Acc:HGNC:24574]	GO:0003723(RNA binding);GO:0005515(protein binding);GO:0005634(nucleus);GO:0005730(nucleolus);GO:0005737(cytoplasm);GO:0005829(cytosol);GO:0032991(protein-containing complex)	NA	NA	NA
1	ENSG00000135047	CTSL	12.9753	9.03009	0.52296	7.21762e-111	3.1349e-106	cathepsin L [Source:HGNC Symbol;Acc:HGNC:2537]	GO:0001968(fibronectin binding);GO:0002224(toll-like receptor signaling pathway);GO:0002250(adaptive immune response);GO:0004197(cysteine-type endopeptidase activity);GO:0005515(protein binding);GO:0005518(collagen binding);GO:0005576(extracellular region);GO:0005615(extracellular space);GO:0005634(nucleus);GO:0005764(lysosome);GO:0006508(proteolysis);GO:0008233(peptidase activity);GO:0008234(cys…	04140(Autophagy - animal);04142(Lysosome);04145(Phagosome);04210(Apoptosis);04612(Antigen processing and presentation);05205(Proteoglycans in cancer);05323(Rheumatoid arthritis);05418(Fluid shear stress and atherosclerosis)	NA	NA
1	ENSG00000275395	FCGBP	0.885026	0.58497	0.597356	3.39891e-110	1.47628e-105	Fc fragment of IgG binding protein [Source:HGNC Symbol;Acc:HGNC:13572]	GO:0005515(protein binding)	NA	NA	NA
1	ENSG00000150540	HNMT	1.93903	1.5281	0.343596	2.61552e-109	1.13603e-104	histamine N-methyltransferase [Source:HGNC Symbol;Acc:HGNC:5028]	GO:0001695(histamine catabolic process);GO:0002347(response to tumor cell);GO:0005737(cytoplasm);GO:0005829(cytosol);GO:0006548(histidine catabolic process);GO:0006972(hyperosmotic response);GO:0007420(brain development);GO:0007585(respiratory gaseous exchange);GO:0008168(methyltransferase activity);GO:0008170(N-methyltransferase activity);GO:0014075(response to amine);GO:0016740(transferase acti…	00340(Histidine metabolism)	K00546	EC:2.1.1.8
1	ENSG00000119865	CNRIP1	0.353668	0.294643	0.263427	4.35508e-109	1.89158e-104	cannabinoid receptor interacting protein 1 [Source:HGNC Symbol;Acc:HGNC:24546]	GO:0005737(cytoplasm);GO:0005886(plasma membrane);GO:0008022(protein C-terminus binding);GO:0031718(type 1 cannabinoid receptor binding)	NA	NA	NA
1	ENSG00000117450	PRDX1	3.5871	2.84542	0.334174	8.7205e-108	3.78766e-103	peroxiredoxin 1 [Source:HGNC Symbol;Acc:HGNC:9352]	GO:0000302(response to reactive oxygen species);GO:0001501(skeletal system development);GO:0001895(retina homeostasis);GO:0003723(RNA binding);GO:0004601(peroxidase activity);GO:0005515(protein binding);GO:0005615(extracellular space);GO:0005623(cell);GO:0005634(nucleus);GO:0005737(cytoplasm);GO:0005829(cytosol);GO:0006979(response to oxidative stress);GO:0008283(cell population proliferation);GO…	04146(Peroxisome)	K13279	EC:1.11.1.15
1	ENSG00000141905	NFIC	1.5595	1.2272	0.345709	1.22794e-107	5.33345e-103	nuclear factor I C [Source:HGNC Symbol;Acc:HGNC:7786]	GO:0000122(negative regulation of transcription by RNA polymerase II);GO:0000978(RNA polymerase II proximal promoter sequence-specific DNA binding);GO:0000981(DNA-binding transcription factor activity, RNA polymerase II-specific);GO:0000987(proximal promoter sequence-specific DNA binding);GO:0001228(DNA-binding transcription activator activity, RNA polymerase II-specific);GO:0001650(fibrillar cen…	NA	K09170	NA
1	ENSG00000174600	CMKLR1	0.627797	0.478088	0.393021	2.03431e-107	8.8358e-103	chemerin chemokine-like receptor 1 [Source:HGNC Symbol;Acc:HGNC:2121]	GO:0001501(skeletal system development);GO:0002430(complement receptor mediated signaling pathway);GO:0004930(G protein-coupled receptor activity);GO:0004950(chemokine receptor activity);GO:0005515(protein binding);GO:0005886(plasma membrane);GO:0005887(integral component of plasma membrane);GO:0006935(chemotaxis);GO:0006954(inflammatory response);GO:0006955(immune response);GO:0007165(signal tra…	NA	NA	NA
1	ENSG00000151491	EPS8	0.996494	0.797079	0.322139	2.81735e-107	1.22369e-102	epidermal growth factor receptor pathway substrate 8 [Source:HGNC Symbol;Acc:HGNC:3420]	GO:0003779(actin binding);GO:0005070(SH3/SH2 adaptor activity);GO:0005515(protein binding);GO:0005737(cytoplasm);GO:0005886(plasma membrane);GO:0005903(brush border);GO:0005938(cell cortex);GO:0007165(signal transduction);GO:0007173(epidermal growth factor receptor signaling pathway);GO:0007266(Rho protein signal transduction);GO:0008283(cell population proliferation);GO:0008344(adult locomotory …	NA	K17277	NA
1	ENSG00000123124	WWP1	0.861118	0.630712	0.44923	3.12648e-105	1.35796e-100	WW domain containing E3 ubiquitin protein ligase 1 [Source:HGNC Symbol;Acc:HGNC:17004]	GO:0000151(ubiquitin ligase complex);GO:0000209(protein polyubiquitination);GO:0004842(ubiquitin-protein transferase activity);GO:0005515(protein binding);GO:0005634(nucleus);GO:0005737(cytoplasm);GO:0005829(cytosol);GO:0005886(plasma membrane);GO:0006511(ubiquitin-dependent protein catabolic process);GO:0007165(signal transduction);GO:0007417(central nervous system development);GO:0016020(membra…	04120(Ubiquitin mediated proteolysis);04144(Endocytosis)	NA	NA
1	ENSG00000112667	DNPH1	0.569678	0.466319	0.28883	5.1876e-105	2.25318e-100	2'-deoxynucleoside 5'-phosphate N-hydrolase 1 [Source:HGNC Symbol;Acc:HGNC:21218]	GO:0005515(protein binding);GO:0005634(nucleus);GO:0005737(cytoplasm);GO:0005829(cytosol);GO:0006195(purine nucleotide catabolic process);GO:0008152(metabolic process);GO:0009116(nucleoside metabolic process);GO:0009117(nucleotide metabolic process);GO:0009159(deoxyribonucleoside monophosphate catabolic process);GO:0016787(hydrolase activity);GO:0016798(hydrolase activity, acting on glycosyl bond…	NA	K22928	EC:3.2.2.-
1	ENSG00000138413	IDH1	0.941597	0.743662	0.340464	1.50299e-104	6.52808e-100	isocitrate dehydrogenase (NADP(+)) 1, cytosolic [Source:HGNC Symbol;Acc:HGNC:5382]	GO:0000287(magnesium ion binding);GO:0004448(isocitrate dehydrogenase activity);GO:0004450(isocitrate dehydrogenase (NADP+) activity);GO:0005102(signaling receptor binding);GO:0005576(extracellular region);GO:0005737(cytoplasm);GO:0005739(mitochondrion);GO:0005777(peroxisome);GO:0005782(peroxisomal matrix);GO:0005829(cytosol);GO:0006097(glyoxylate cycle);GO:0006099(tricarboxylic acid cycle);GO:00…	00020(Citrate cycle (TCA cycle));00480(Glutathione metabolism);04146(Peroxisome);05230(Central carbon metabolism in cancer)	NA	NA
1	ENSG00000182578	CSF1R	3.26251	2.62193	0.315355	2.0285e-104	8.8106e-100	colony stimulating factor 1 receptor [Source:HGNC Symbol;Acc:HGNC:2433]	GO:0000166(nucleotide binding);GO:0001934(positive regulation of protein phosphorylation);GO:0002244(hematopoietic progenitor cell differentiation);GO:0002376(immune system process);GO:0002931(response to ischemia);GO:0004672(protein kinase activity);GO:0004713(protein tyrosine kinase activity);GO:0004714(transmembrane receptor protein tyrosine kinase activity);GO:0005011(macrophage colony-stimul…	04010(MAPK signaling pathway);04014(Ras signaling pathway);04015(Rap1 signaling pathway);04060(Cytokine-cytokine receptor interaction);04151(PI3K-Akt signaling pathway);04380(Osteoclast differentiation);04640(Hematopoietic cell lineage);05200(Pathways in cancer);05202(Transcriptional misregulation in cancer);05221(Acute myeloid leukemia)	NA	NA
1	ENSG00000136295	TTYH3	1.2998	1.00715	0.368006	2.5256e-104	1.09697e-99	tweety family member 3 [Source:HGNC Symbol;Acc:HGNC:22222]	GO:0005229(intracellular calcium activated chloride channel activity);GO:0005254(chloride channel activity);GO:0005886(plasma membrane);GO:0006811(ion transport);GO:0006821(chloride transport);GO:0016020(membrane);GO:0016021(integral component of membrane);GO:0034220(ion transmembrane transport);GO:0034707(chloride channel complex);GO:0070062(extracellular exosome);GO:0072320(volume-sensitive chl…	NA	K22641	NA
1	ENSG00000115414	FN1	20.4148	12.9797	0.653359	4.21628e-104	1.8313e-99	fibronectin 1 [Source:HGNC Symbol;Acc:HGNC:3778]	GO:0001525(angiogenesis);GO:0001932(regulation of protein phosphorylation);GO:0002020(protease binding);GO:0002576(platelet degranulation);GO:0005102(signaling receptor binding);GO:0005178(integrin binding);GO:0005201(extracellular matrix structural constituent);GO:0005515(protein binding);GO:0005518(collagen binding);GO:0005576(extracellular region);GO:0005577(fibrinogen complex);GO:0005604(base…	04151(PI3K-Akt signaling pathway);04510(Focal adhesion);04512(ECM-receptor interaction);04810(Regulation of actin cytoskeleton);04933(AGE-RAGE signaling pathway in diabetic complications);05100(Bacterial invasion of epithelial cells);05146(Amoebiasis);05165(Human papillomavirus infection);05200(Pathways in cancer);05205(Proteoglycans in cancer);05222(Small cell lung cancer)	NA	NA
1	ENSG00000138758	SEPT11	0.629434	0.498538	0.336352	7.13645e-104	3.09965e-99	septin 11 [Source:HGNC Symbol;Acc:HGNC:25589]	GO:0000166(nucleotide binding);GO:0001725(stress fiber);GO:0003924(GTPase activity);GO:0005515(protein binding);GO:0005525(GTP binding);GO:0005737(cytoplasm);GO:0005856(cytoskeleton);GO:0005940(septin ring);GO:0007049(cell cycle);GO:0015630(microtubule cytoskeleton);GO:0030054(cell junction);GO:0030424(axon);GO:0031105(septin complex);GO:0032947(protein-containing complex scaffold activity);GO:00…	05100(Bacterial invasion of epithelial cells)	K16939	NA
1	ENSG00000173905	GOLIM4	0.915957	0.707037	0.373494	6.14815e-103	2.67039e-98	golgi integral membrane protein 4 [Source:HGNC Symbol;Acc:HGNC:15448]	GO:0000139(Golgi membrane);GO:0005768(endosome);GO:0005794(Golgi apparatus);GO:0005796(Golgi lumen);GO:0005801(cis-Golgi network);GO:0010008(endosome membrane);GO:0016020(membrane);GO:0016021(integral component of membrane);GO:0030133(transport vesicle);GO:0030139(endocytic vesicle);GO:0032580(Golgi cisterna membrane)	NA	NA	NA
1	ENSG00000113552	GNPDA1	1.09455	0.866973	0.336282	7.42905e-103	3.22674e-98	glucosamine-6-phosphate deaminase 1 [Source:HGNC Symbol;Acc:HGNC:4417]	GO:0004342(glucosamine-6-phosphate deaminase activity);GO:0005515(protein binding);GO:0005737(cytoplasm);GO:0005829(cytosol);GO:0005975(carbohydrate metabolic process);GO:0006043(glucosamine catabolic process);GO:0006044(N-acetylglucosamine metabolic process);GO:0006046(N-acetylglucosamine catabolic process);GO:0006048(UDP-N-acetylglucosamine biosynthetic process);GO:0006091(generation of precurs…	00520(Amino sugar and nucleotide sugar metabolism)	K02564	EC:3.5.99.6
1	ENSG00000250479	CHCHD10	1.39532	1.12638	0.30891	8.31658e-103	3.61222e-98	coiled-coil-helix-coiled-coil-helix domain containing 10 [Source:HGNC Symbol;Acc:HGNC:15559]	GO:0003674(molecular_function);GO:0005515(protein binding);GO:0005634(nucleus);GO:0005739(mitochondrion);GO:0005758(mitochondrial intermembrane space);GO:0006119(oxidative phosphorylation);GO:0007005(mitochondrion organization);GO:0030322(stabilization of membrane potential);GO:0031930(mitochondria-nucleus signaling pathway);GO:0032984(protein-containing complex disassembly);GO:0034504(protein lo…	NA	K22759	NA
1	ENSG00000162512	SDC3	0.538622	0.424037	0.345084	1.09939e-102	4.77508e-98	syndecan 3 [Source:HGNC Symbol;Acc:HGNC:10660]	GO:0001523(retinoid metabolic process);GO:0005515(protein binding);GO:0005796(Golgi lumen);GO:0005886(plasma membrane);GO:0006024(glycosaminoglycan biosynthetic process);GO:0006027(glycosaminoglycan catabolic process);GO:0009986(cell surface);GO:0016020(membrane);GO:0016021(integral component of membrane);GO:0016477(cell migration);GO:0042802(identical protein binding);GO:0043202(lysosomal lumen)…	04514(Cell adhesion molecules (CAMs))	K16337	NA
1	ENSG00000074695	LMAN1	0.951397	0.760279	0.323518	2.55038e-102	1.10773e-97	lectin, mannose binding 1 [Source:HGNC Symbol;Acc:HGNC:6631]	GO:0000139(Golgi membrane);GO:0005515(protein binding);GO:0005537(mannose binding);GO:0005783(endoplasmic reticulum);GO:0005789(endoplasmic reticulum membrane);GO:0005793(endoplasmic reticulum-Golgi intermediate compartment);GO:0005794(Golgi apparatus);GO:0005829(cytosol);GO:0006457(protein folding);GO:0006888(endoplasmic reticulum to Golgi vesicle-mediated transport);GO:0007029(endoplasmic retic…	04141(Protein processing in endoplasmic reticulum)	NA	NA
1	ENSG00000161203	AP2M1	2.64035	2.06485	0.354697	8.58195e-102	3.72749e-97	adaptor related protein complex 2 subunit mu 1 [Source:HGNC Symbol;Acc:HGNC:564]	GO:0002092(positive regulation of receptor internalization);GO:0005048(signal sequence binding);GO:0005215(transporter activity);GO:0005515(protein binding);GO:0005765(lysosomal membrane);GO:0005829(cytosol);GO:0005886(plasma membrane);GO:0005905(clathrin-coated pit);GO:0006886(intracellular protein transport);GO:0006897(endocytosis);GO:0006900(vesicle budding from membrane);GO:0008289(lipid bind…	04144(Endocytosis);04721(Synaptic vesicle cycle);04961(Endocrine and other factor-regulated calcium reabsorption);05016(Huntington disease)	K11826	NA
1	ENSG00000108774	RAB5C	2.7871	2.28463	0.286804	1.87173e-99	8.12966e-95	RAB5C, member RAS oncogene family [Source:HGNC Symbol;Acc:HGNC:9785]	GO:0000166(nucleotide binding);GO:0003924(GTPase activity);GO:0005515(protein binding);GO:0005525(GTP binding);GO:0005765(lysosomal membrane);GO:0005768(endosome);GO:0005769(early endosome);GO:0005811(lipid droplet);GO:0005886(plasma membrane);GO:0006886(intracellular protein transport);GO:0015031(protein transport);GO:0016020(membrane);GO:0019003(GDP binding);GO:0030100(regulation of endocytosis…	04014(Ras signaling pathway);04144(Endocytosis);04145(Phagosome);04962(Vasopressin-regulated water reabsorption);05146(Amoebiasis);05152(Tuberculosis)	K07889	NA
1	ENSG00000140416	TPM1	0.939165	0.678686	0.468634	5.06709e-99	2.20084e-94	tropomyosin 1 [Source:HGNC Symbol;Acc:HGNC:12010]	GO:0001701(in utero embryonic development);GO:0001725(stress fiber);GO:0003065(positive regulation of heart rate by epinephrine);GO:0003779(actin binding);GO:0005200(structural constituent of cytoskeleton);GO:0005515(protein binding);GO:0005737(cytoplasm);GO:0005829(cytosol);GO:0005856(cytoskeleton);GO:0005862(muscle thin filament tropomyosin);GO:0005884(actin filament);GO:0006936(muscle contract…	04260(Cardiac muscle contraction);04261(Adrenergic signaling in cardiomyocytes);05206(MicroRNAs in cancer);05410(Hypertrophic cardiomyopathy (HCM));05414(Dilated cardiomyopathy (DCM))	K10373	NA
1	ENSG00000060982	BCAT1	2.14412	1.74667	0.295781	5.59318e-99	2.42934e-94	branched chain amino acid transaminase 1 [Source:HGNC Symbol;Acc:HGNC:976]	GO:0000082(G1/S transition of mitotic cell cycle);GO:0003824(catalytic activity);GO:0004084(branched-chain-amino-acid transaminase activity);GO:0005737(cytoplasm);GO:0005739(mitochondrion);GO:0005829(cytosol);GO:0008283(cell population proliferation);GO:0008483(transaminase activity);GO:0008652(cellular amino acid biosynthetic process);GO:0009081(branched-chain amino acid metabolic process);GO:00…	00270(Cysteine and methionine metabolism);00280(Valine, leucine and isoleucine degradation);00290(Valine, leucine and isoleucine biosynthesis);00770(Pantothenate and CoA biosynthesis)	NA	NA
1	ENSG00000002549	LAP3	1.24359	1.01832	0.288312	1.17102e-98	5.08623e-94	leucine aminopeptidase 3 [Source:HGNC Symbol;Acc:HGNC:18449]	GO:0004177(aminopeptidase activity);GO:0005622(intracellular);GO:0005634(nucleus);GO:0005654(nucleoplasm);GO:0005737(cytoplasm);GO:0005802(trans-Golgi network);GO:0005829(cytosol);GO:0005925(focal adhesion);GO:0006508(proteolysis);GO:0008233(peptidase activity);GO:0008235(metalloexopeptidase activity);GO:0016787(hydrolase activity);GO:0019538(protein metabolic process);GO:0030145(manganese ion bi…	00330(Arginine and proline metabolism);00480(Glutathione metabolism)	K11142	3.4.11.5;EC:3.4.11.1
1	ENSG00000106991	ENG	2.65976	2.06607	0.364406	4.11544e-98	1.7875e-93	endoglin [Source:HGNC Symbol;Acc:HGNC:3349]	GO:0001300(chronological cell aging);GO:0001525(angiogenesis);GO:0001569(branching involved in blood vessel morphogenesis);GO:0001570(vasculogenesis);GO:0001934(positive regulation of protein phosphorylation);GO:0001947(heart looping);GO:0003148(outflow tract septum morphogenesis);GO:0003198(epithelial to mesenchymal transition involved in endocardial cushion formation);GO:0003203(endocardial cus…	NA	K06526	NA
1	ENSG00000185432	METTL7A	1.54606	1.17174	0.39995	3.70752e-97	1.61032e-92	methyltransferase like 7A [Source:HGNC Symbol;Acc:HGNC:24550]	GO:0005576(extracellular region);GO:0005783(endoplasmic reticulum);GO:0005811(lipid droplet);GO:0008168(methyltransferase activity);GO:0016020(membrane);GO:0016021(integral component of membrane);GO:0016740(transferase activity);GO:0032259(methylation);GO:0043312(neutrophil degranulation);GO:1904724(tertiary granule lumen)	NA	NA	NA
1	ENSG00000163565	IFI16	2.52236	2.05621	0.294787	7.1714e-97	3.11482e-92	interferon gamma inducible protein 16 [Source:HGNC Symbol;Acc:HGNC:5395]	GO:0000122(negative regulation of transcription by RNA polymerase II);GO:0000978(RNA polymerase II proximal promoter sequence-specific DNA binding);GO:0001227(DNA-binding transcription repressor activity, RNA polymerase II-specific);GO:0001819(positive regulation of cytokine production);GO:0002218(activation of innate immune response);GO:0002376(immune system process);GO:0003677(DNA binding);GO:0…	04621(NOD-like receptor signaling pathway)	NA	NA
1	ENSG00000168214	RBPJ	4.04202	2.98969	0.435079	3.63745e-96	1.57989e-91	recombination signal binding protein for immunoglobulin kappa J region [Source:HGNC Symbol;Acc:HGNC:5724]	GO:0000122(negative regulation of transcription by RNA polymerase II);GO:0000978(RNA polymerase II proximal promoter sequence-specific DNA binding);GO:0000981(DNA-binding transcription factor activity, RNA polymerase II-specific);GO:0001103(RNA polymerase II repressing transcription factor binding);GO:0001228(DNA-binding transcription activator activity, RNA polymerase II-specific);GO:0001525(ang…	04330(Notch signaling pathway);04658(Th1 and Th2 cell differentiation);05165(Human papillomavirus infection);05169(Epstein-Barr virus infection);05203(Viral carcinogenesis)	K06053	NA
1	ENSG00000214063	TSPAN4	0.825275	0.636032	0.375774	4.19668e-96	1.82279e-91	tetraspanin 4 [Source:HGNC Symbol;Acc:HGNC:11859]	GO:0003823(antigen binding);GO:0005178(integrin binding);GO:0005515(protein binding);GO:0005886(plasma membrane);GO:0005887(integral component of plasma membrane);GO:0005925(focal adhesion);GO:0007166(cell surface receptor signaling pathway);GO:0016020(membrane);GO:0016021(integral component of membrane);GO:0031982(vesicle);GO:0065003(protein-containing complex assembly)	NA	K17294	NA
1	ENSG00000175567	UCP2	2.05742	1.64876	0.31946	4.80468e-96	2.08687e-91	uncoupling protein 2 [Source:HGNC Symbol;Acc:HGNC:12518]	GO:0000303(response to superoxide);GO:0001666(response to hypoxia);GO:0005515(protein binding);GO:0005737(cytoplasm);GO:0005739(mitochondrion);GO:0005743(mitochondrial inner membrane);GO:0006839(mitochondrial transport);GO:0007565(female pregnancy);GO:0007568(aging);GO:0009409(response to cold);GO:0009749(response to glucose);GO:0010942(positive regulation of cell death);GO:0016020(membrane);GO:0…	NA	K15103	NA
1	ENSG00000185896	LAMP1	2.63465	2.19242	0.265088	1.0016e-95	4.35036e-91	lysosomal associated membrane protein 1 [Source:HGNC Symbol;Acc:HGNC:6499]	GO:0001618(virus receptor activity);GO:0005515(protein binding);GO:0005737(cytoplasm);GO:0005764(lysosome);GO:0005765(lysosomal membrane);GO:0005768(endosome);GO:0005770(late endosome);GO:0005771(multivesicular body);GO:0005773(vacuole);GO:0005829(cytosol);GO:0005886(plasma membrane);GO:0005887(integral component of plasma membrane);GO:0008021(synaptic vesicle);GO:0008626(granzyme-mediated apopto…	04140(Autophagy - animal);04142(Lysosome);04145(Phagosome);05152(Tuberculosis)	K06528	NA
1	ENSG00000074416	MGLL	0.574219	0.477503	0.266093	1.02039e-95	4.43197e-91	monoglyceride lipase [Source:HGNC Symbol;Acc:HGNC:17038]	GO:0004622(lysophospholipase activity);GO:0005515(protein binding);GO:0005654(nucleoplasm);GO:0005737(cytoplasm);GO:0005789(endoplasmic reticulum membrane);GO:0005829(cytosol);GO:0005886(plasma membrane);GO:0006629(lipid metabolic process);GO:0006631(fatty acid metabolic process);GO:0006633(fatty acid biosynthetic process);GO:0006954(inflammatory response);GO:0009966(regulation of signal transduc…	00561(Glycerolipid metabolism);04714(Thermogenesis);04723(Retrograde endocannabinoid signaling);04923(Regulation of lipolysis in adipocytes)	K01054	EC:3.1.1.23
1	ENSG00000167085	PHB	1.07477	0.866692	0.310432	9.52388e-94	4.1366e-89	prohibitin [Source:HGNC Symbol;Acc:HGNC:8912]	GO:0000122(negative regulation of transcription by RNA polymerase II);GO:0000981(DNA-binding transcription factor activity, RNA polymerase II-specific);GO:0001541(ovarian follicle development);GO:0001552(ovarian follicle atresia);GO:0001649(osteoblast differentiation);GO:0001850(complement component C3a binding);GO:0001851(complement component C3b binding);GO:0005515(protein binding);GO:0005634(n…	NA	K17080	NA
1	ENSG00000138760	SCARB2	2.00948	1.64341	0.290128	2.80626e-93	1.21887e-88	scavenger receptor class B member 2 [Source:HGNC Symbol;Acc:HGNC:1665]	GO:0000139(Golgi membrane);GO:0001618(virus receptor activity);GO:0001786(phosphatidylserine binding);GO:0004888(transmembrane signaling receptor activity);GO:0005044(scavenger receptor activity);GO:0005515(protein binding);GO:0005548(phospholipid transporter activity);GO:0005764(lysosome);GO:0005765(lysosomal membrane);GO:0005789(endoplasmic reticulum membrane);GO:0005886(plasma membrane);GO:000…	04142(Lysosome)	NA	NA
1	ENSG00000133142	TCEAL4	0.97763	0.793068	0.301844	3.17881e-93	1.38068e-88	transcription elongation factor A like 4 [Source:HGNC Symbol;Acc:HGNC:26121]	GO:0003746(translation elongation factor activity);GO:0005634(nucleus);GO:0006414(translational elongation);GO:0050699(WW domain binding)	NA	NA	NA
1	ENSG00000116649	SRM	1.18359	0.91715	0.367944	1.37809e-92	5.98559e-88	spermidine synthase [Source:HGNC Symbol;Acc:HGNC:11296]	GO:0003824(catalytic activity);GO:0004766(spermidine synthase activity);GO:0005515(protein binding);GO:0005829(cytosol);GO:0006595(polyamine metabolic process);GO:0006596(polyamine biosynthetic process);GO:0008295(spermidine biosynthetic process);GO:0016740(transferase activity);GO:0042802(identical protein binding);GO:0042803(protein homodimerization activity);GO:1990830(cellular response to leu…	00270(Cysteine and methionine metabolism);00330(Arginine and proline metabolism);00410(beta-Alanine metabolism);00480(Glutathione metabolism)	K00797	EC:2.5.1.16
1	ENSG00000116729	WLS	0.451472	0.363374	0.31318	4.82727e-92	2.09668e-87	Wnt ligand secretion mediator [Source:HGNC Symbol;Acc:HGNC:30238]	GO:0000139(Golgi membrane);GO:0001707(mesoderm formation);GO:0005515(protein binding);GO:0005768(endosome);GO:0005769(early endosome);GO:0005783(endoplasmic reticulum);GO:0005789(endoplasmic reticulum membrane);GO:0005794(Golgi apparatus);GO:0005802(trans-Golgi network);GO:0005886(plasma membrane);GO:0006886(intracellular protein transport);GO:0007275(multicellular organism development);GO:000994…	NA	NA	NA
1	ENSG00000154122	ANKH	0.882451	0.729205	0.275191	4.26297e-91	1.85158e-86	ANKH inorganic pyrophosphate transport regulator [Source:HGNC Symbol;Acc:HGNC:15492]	GO:0001501(skeletal system development);GO:0005315(inorganic phosphate transmembrane transporter activity);GO:0005886(plasma membrane);GO:0005887(integral component of plasma membrane);GO:0006817(phosphate ion transport);GO:0007626(locomotory behavior);GO:0015114(phosphate ion transmembrane transporter activity);GO:0016020(membrane);GO:0016021(integral component of membrane);GO:0019867(outer memb…	NA	K22734	NA
1	ENSG00000121933	TMIGD3	1.03693	0.772443	0.424816	7.63979e-91	3.31826e-86	transmembrane and immunoglobulin domain containing 3 [Source:HGNC Symbol;Acc:HGNC:51375]	GO:0004930(G protein-coupled receptor activity);GO:0005887(integral component of plasma membrane);GO:0006954(inflammatory response);GO:0007165(signal transduction);GO:0007186(G protein-coupled receptor signaling pathway);GO:0007190(activation of adenylate cyclase activity);GO:0008016(regulation of heart contraction);GO:0008285(negative regulation of cell population proliferation);GO:0009611(respo…	NA	NA	NA
1	ENSG00000002587	HS3ST1	0.556738	0.446994	0.316742	3.00483e-90	1.30512e-85	heparan sulfate-glucosamine 3-sulfotransferase 1 [Source:HGNC Symbol;Acc:HGNC:5194]	GO:0005794(Golgi apparatus);GO:0005796(Golgi lumen);GO:0006024(glycosaminoglycan biosynthetic process);GO:0008146(sulfotransferase activity);GO:0008467([heparan sulfate]-glucosamine 3-sulfotransferase 1 activity);GO:0015012(heparan sulfate proteoglycan biosynthetic process);GO:0016740(transferase activity);GO:0034483(heparan sulfate sulfotransferase activity)	00534(Glycosaminoglycan biosynthesis - heparan sulfate / heparin)	K01024	EC:2.8.2.23
1	ENSG00000135838	NPL	1.60817	1.28584	0.322717	4.24123e-90	1.84214e-85	N-acetylneuraminate pyruvate lyase [Source:HGNC Symbol;Acc:HGNC:16781]	GO:0003824(catalytic activity);GO:0005515(protein binding);GO:0005737(cytoplasm);GO:0005829(cytosol);GO:0005975(carbohydrate metabolic process);GO:0008747(N-acetylneuraminate lyase activity);GO:0016829(lyase activity);GO:0019262(N-acetylneuraminate catabolic process);GO:0042802(identical protein binding)	00520(Amino sugar and nucleotide sugar metabolism)	K01639	EC:4.1.3.3
1	ENSG00000166228	PCBD1	0.65936	0.548804	0.264776	6.09309e-90	2.64647e-85	pterin-4 alpha-carbinolamine dehydratase 1 [Source:HGNC Symbol;Acc:HGNC:8646]	GO:0003713(transcription coactivator activity);GO:0004505(phenylalanine 4-monooxygenase activity);GO:0005515(protein binding);GO:0005634(nucleus);GO:0005654(nucleoplasm);GO:0005737(cytoplasm);GO:0005829(cytosol);GO:0006558(L-phenylalanine metabolic process);GO:0006559(L-phenylalanine catabolic process);GO:0006729(tetrahydrobiopterin biosynthetic process);GO:0008124(4-alpha-hydroxytetrahydrobiopte…	00790(Folate biosynthesis)	K01724	EC:4.2.1.96
1	ENSG00000239672	NME1	1.25536	0.959064	0.388405	6.52168e-90	2.83263e-85	NME/NM23 nucleoside diphosphate kinase 1 [Source:HGNC Symbol;Acc:HGNC:7849]	GO:0000166(nucleotide binding);GO:0000287(magnesium ion binding);GO:0000977(RNA polymerase II regulatory region sequence-specific DNA binding);GO:0002762(negative regulation of myeloid leukocyte differentiation);GO:0003697(single-stranded DNA binding);GO:0003723(RNA binding);GO:0004536(deoxyribonuclease activity);GO:0004550(nucleoside diphosphate kinase activity);GO:0005515(protein binding);GO:00…	00230(Purine metabolism);00240(Pyrimidine metabolism);00983(Drug metabolism - other enzymes)	K00940	EC:2.7.4.6
1	ENSG00000205302	SNX2	1.87962	1.51392	0.312153	1.71811e-89	7.46244e-85	sorting nexin 2 [Source:HGNC Symbol;Acc:HGNC:11173]	GO:0005154(epidermal growth factor receptor binding);GO:0005158(insulin receptor binding);GO:0005515(protein binding);GO:0005737(cytoplasm);GO:0005764(lysosome);GO:0005768(endosome);GO:0005829(cytosol);GO:0006886(intracellular protein transport);GO:0006897(endocytosis);GO:0008289(lipid binding);GO:0010008(endosome membrane);GO:0015031(protein transport);GO:0016020(membrane);GO:0030027(lamellipodi…	04144(Endocytosis)	K17917	NA
1	ENSG00000168268	NT5DC2	0.636441	0.529126	0.266416	7.55343e-89	3.28076e-84	5'-nucleotidase domain containing 2 [Source:HGNC Symbol;Acc:HGNC:25717]	GO:0008253(5'-nucleotidase activity);GO:0016311(dephosphorylation);GO:0016787(hydrolase activity);GO:0046872(metal ion binding)	NA	NA	NA
1	ENSG00000170323	FABP4	2.81368	2.26902	0.310385	1.10766e-88	4.81103e-84	fatty acid binding protein 4 [Source:HGNC Symbol;Acc:HGNC:3559]	GO:0001816(cytokine production);GO:0005324(long-chain fatty acid transporter activity);GO:0005504(fatty acid binding);GO:0005634(nucleus);GO:0005737(cytoplasm);GO:0005811(lipid droplet);GO:0005829(cytosol);GO:0006469(negative regulation of protein kinase activity);GO:0008289(lipid binding);GO:0009617(response to bacterium);GO:0015909(long-chain fatty acid transport);GO:0019433(triglyceride catabo…	03320(PPAR signaling pathway);04923(Regulation of lipolysis in adipocytes)	K08753	NA
1	ENSG00000170571	EMB	1.48814	1.09636	0.440785	1.57664e-88	6.84796e-84	embigin [Source:HGNC Symbol;Acc:HGNC:30465]	GO:0005886(plasma membrane);GO:0005887(integral component of plasma membrane);GO:0007156(homophilic cell adhesion via plasma membrane adhesion molecules);GO:0007411(axon guidance);GO:0016020(membrane);GO:0016021(integral component of membrane);GO:0030054(cell junction);GO:0030424(axon);GO:0035879(plasma membrane lactate transport);GO:0045202(synapse);GO:0070593(dendrite self-avoidance);GO:0098632…	NA	NA	NA
1	ENSG00000139679	LPAR6	0.998457	0.811225	0.299597	1.65364e-88	7.18242e-84	lysophosphatidic acid receptor 6 [Source:HGNC Symbol;Acc:HGNC:15520]	GO:0001835(blastocyst hatching);GO:0004930(G protein-coupled receptor activity);GO:0005886(plasma membrane);GO:0005887(integral component of plasma membrane);GO:0007165(signal transduction);GO:0007186(G protein-coupled receptor signaling pathway);GO:0016020(membrane);GO:0016021(integral component of membrane);GO:0035025(positive regulation of Rho protein signal transduction);GO:0043231(intracellu…	04072(Phospholipase D signaling pathway);04080(Neuroactive ligand-receptor interaction);04151(PI3K-Akt signaling pathway);05200(Pathways in cancer)	K04273	NA
1	ENSG00000108960	MMD	0.411964	0.342955	0.264498	5.2715e-88	2.28962e-83	monocyte to macrophage differentiation associated [Source:HGNC Symbol;Acc:HGNC:7153]	GO:0004672(protein kinase activity);GO:0005764(lysosome);GO:0005765(lysosomal membrane);GO:0005768(endosome);GO:0005794(Golgi apparatus);GO:0005887(integral component of plasma membrane);GO:0006468(protein phosphorylation);GO:0016020(membrane);GO:0016021(integral component of membrane);GO:0019835(cytolysis);GO:0031902(late endosome membrane);GO:0032880(regulation of protein localization);GO:00380…	NA	K11064	NA
1	ENSG00000124299	PEPD	0.89417	0.707435	0.337951	7.22129e-88	3.13649e-83	peptidase D [Source:HGNC Symbol;Acc:HGNC:8840]	GO:0004177(aminopeptidase activity);GO:0004181(metallocarboxypeptidase activity);GO:0005515(protein binding);GO:0005634(nucleus);GO:0005654(nucleoplasm);GO:0006508(proteolysis);GO:0006520(cellular amino acid metabolic process);GO:0008233(peptidase activity);GO:0008237(metallopeptidase activity);GO:0016787(hydrolase activity);GO:0016805(dipeptidase activity);GO:0030145(manganese ion binding);GO:00…	NA	K14213	EC:3.4.13.9
1	ENSG00000248187	AC078850.1	0.487106	0.396396	0.297292	3.27251e-87	1.42138e-82	novel transcript	NA	NA	NA	NA
1	ENSG00000110917	MLEC	1.54435	1.22737	0.331429	2.85209e-86	1.23878e-81	malectin [Source:HGNC Symbol;Acc:HGNC:28973]	GO:0005783(endoplasmic reticulum);GO:0005789(endoplasmic reticulum membrane);GO:0005886(plasma membrane);GO:0005975(carbohydrate metabolic process);GO:0006457(protein folding);GO:0016020(membrane);GO:0016021(integral component of membrane);GO:0019899(enzyme binding);GO:0030246(carbohydrate binding);GO:0035579(specific granule membrane);GO:0043312(neutrophil degranulation)	NA	NA	NA
1	ENSG00000136942	RPL35	13.2113	10.8061	0.289931	1.22802e-85	5.33379e-81	ribosomal protein L35 [Source:HGNC Symbol;Acc:HGNC:10344]	GO:0000184(nuclear-transcribed mRNA catabolic process, nonsense-mediated decay);GO:0000463(maturation of LSU-rRNA from tricistronic rRNA transcript (SSU-rRNA, 5.8S rRNA, LSU-rRNA));GO:0003723(RNA binding);GO:0003729(mRNA binding);GO:0003735(structural constituent of ribosome);GO:0005622(intracellular);GO:0005730(nucleolus);GO:0005829(cytosol);GO:0005840(ribosome);GO:0006412(translation);GO:000641…	03010(Ribosome)	K02918	NA
1	ENSG00000181467	RAP2B	1.84811	1.49776	0.303243	4.27919e-85	1.85862e-80	RAP2B, member of RAS oncogene family [Source:HGNC Symbol;Acc:HGNC:9862]	GO:0000166(nucleotide binding);GO:0003924(GTPase activity);GO:0005515(protein binding);GO:0005525(GTP binding);GO:0005768(endosome);GO:0005829(cytosol);GO:0005886(plasma membrane);GO:0005923(bicellular tight junction);GO:0007165(signal transduction);GO:0016020(membrane);GO:0019003(GDP binding);GO:0019904(protein domain specific binding);GO:0030168(platelet activation);GO:0030336(negative regulati…	NA	K07838	NA
1	ENSG00000160014	CALM3	3.48946	2.75336	0.341808	5.16384e-84	2.24286e-79	calmodulin 3 [Source:HGNC Symbol;Acc:HGNC:1449]	GO:0000086(G2/M transition of mitotic cell cycle);GO:0000922(spindle pole);GO:0001975(response to amphetamine);GO:0002027(regulation of heart rate);GO:0005509(calcium ion binding);GO:0005513(detection of calcium ion);GO:0005515(protein binding);GO:0005634(nucleus);GO:0005737(cytoplasm);GO:0005813(centrosome);GO:0005815(microtubule organizing center);GO:0005819(spindle);GO:0005856(cytoskeleton);GO…	04014(Ras signaling pathway);04015(Rap1 signaling pathway);04020(Calcium signaling pathway);04022(cGMP-PKG signaling pathway);04024(cAMP signaling pathway);04070(Phosphatidylinositol signaling system);04114(Oocyte meiosis);04218(Cellular senescence);04261(Adrenergic signaling in cardiomyocytes);04270(Vascular smooth muscle contraction);04371(Apelin signaling pathway);04625(C-type lectin receptor …	NA	NA
1	ENSG00000168615	ADAM9	1.86495	1.51976	0.295294	9.68258e-84	4.20553e-79	ADAM metallopeptidase domain 9 [Source:HGNC Symbol;Acc:HGNC:216]	GO:0000186(activation of MAPKK activity);GO:0004222(metalloendopeptidase activity);GO:0005080(protein kinase C binding);GO:0005178(integrin binding);GO:0005515(protein binding);GO:0005518(collagen binding);GO:0005576(extracellular region);GO:0005615(extracellular space);GO:0005886(plasma membrane);GO:0005925(focal adhesion);GO:0006508(proteolysis);GO:0006509(membrane protein ectodomain proteolysi…	NA	K06834	EC:3.4.24.-
1	ENSG00000145703	IQGAP2	1.51202	1.09347	0.467557	1.02612e-83	4.45685e-79	IQ motif containing GTPase activating protein 2 [Source:HGNC Symbol;Acc:HGNC:6111]	GO:0003779(actin binding);GO:0005095(GTPase inhibitor activity);GO:0005515(protein binding);GO:0005516(calmodulin binding);GO:0005547(phosphatidylinositol-3,4,5-trisphosphate binding);GO:0005737(cytoplasm);GO:0005829(cytosol);GO:0005886(plasma membrane);GO:0005902(microvillus);GO:0007165(signal transduction);GO:0009986(cell surface);GO:0015629(actin cytoskeleton);GO:0017048(Rho GTPase binding);GO…	04810(Regulation of actin cytoskeleton)	K05767	NA
1	ENSG00000075618	FSCN1	0.489799	0.397999	0.299425	1.10047e-83	4.77977e-79	fascin actin-bundling protein 1 [Source:HGNC Symbol;Acc:HGNC:11148]	GO:0001725(stress fiber);GO:0001726(ruffle);GO:0002102(podosome);GO:0003723(RNA binding);GO:0003779(actin binding);GO:0005515(protein binding);GO:0005737(cytoplasm);GO:0005829(cytosol);GO:0005856(cytoskeleton);GO:0005902(microvillus);GO:0005911(cell-cell junction);GO:0007015(actin filament organization);GO:0007043(cell-cell junction assembly);GO:0007163(establishment or maintenance of cell polari…	05206(MicroRNAs in cancer)	K17455	NA
1	ENSG00000166562	SEC11C	0.895983	0.711044	0.333532	2.32199e-83	1.00854e-78	SEC11 homolog C, signal peptidase complex subunit [Source:HGNC Symbol;Acc:HGNC:23400]	GO:0005783(endoplasmic reticulum);GO:0005787(signal peptidase complex);GO:0005789(endoplasmic reticulum membrane);GO:0006465(signal peptide processing);GO:0006508(proteolysis);GO:0008233(peptidase activity);GO:0008236(serine-type peptidase activity);GO:0016020(membrane);GO:0016021(integral component of membrane);GO:0016787(hydrolase activity);GO:0031090(organelle membrane);GO:0043231(intracellula…	03060(Protein export)	K13280	EC:3.4.21.89
1	ENSG00000196776	CD47	1.25059	1.02051	0.29332	3.05905e-83	1.32867e-78	CD47 molecule [Source:HGNC Symbol;Acc:HGNC:1682]	GO:0005515(protein binding);GO:0005886(plasma membrane);GO:0005887(integral component of plasma membrane);GO:0007155(cell adhesion);GO:0007229(integrin-mediated signaling pathway);GO:0008228(opsonization);GO:0008284(positive regulation of cell population proliferation);GO:0009617(response to bacterium);GO:0009986(cell surface);GO:0016020(membrane);GO:0016021(integral component of membrane);GO:001…	04512(ECM-receptor interaction)	NA	NA
1	ENSG00000105810	CDK6	0.732597	0.596777	0.295829	3.9351e-83	1.70917e-78	cyclin dependent kinase 6 [Source:HGNC Symbol;Acc:HGNC:1777]	GO:0000082(G1/S transition of mitotic cell cycle);GO:0000122(negative regulation of transcription by RNA polymerase II);GO:0000166(nucleotide binding);GO:0000307(cyclin-dependent protein kinase holoenzyme complex);GO:0001726(ruffle);GO:0001954(positive regulation of cell-matrix adhesion);GO:0002244(hematopoietic progenitor cell differentiation);GO:0003323(type B pancreatic cell development);GO:00…	04110(Cell cycle);04115(p53 signaling pathway);04151(PI3K-Akt signaling pathway);04218(Cellular senescence);04934(Cushing syndrome);05160(Hepatitis C);05162(Measles);05163(Human cytomegalovirus infection);05165(Human papillomavirus infection);05167(Kaposi sarcoma-associated herpesvirus infection);05169(Epstein-Barr virus infection);05200(Pathways in cancer);05203(Viral carcinogenesis);05206(Micro…	NA	NA
1	ENSG00000077549	CAPZB	4.15352	3.45741	0.264646	2.84887e-82	1.23738e-77	capping actin protein of muscle Z-line subunit beta [Source:HGNC Symbol;Acc:HGNC:1491]	GO:0000902(cell morphogenesis);GO:0003779(actin binding);GO:0005515(protein binding);GO:0005737(cytoplasm);GO:0005829(cytosol);GO:0005856(cytoskeleton);GO:0005903(brush border);GO:0006888(endoplasmic reticulum to Golgi vesicle-mediated transport);GO:0007010(cytoskeleton organization);GO:0007596(blood coagulation);GO:0008290(F-actin capping protein complex);GO:0010591(regulation of lamellipodium a…	04144(Endocytosis)	NA	NA
1	ENSG00000107551	RASSF4	1.34243	1.05035	0.353974	4.81807e-82	2.09268e-77	Ras association domain family member 4 [Source:HGNC Symbol;Acc:HGNC:20793]	GO:0005515(protein binding);GO:0007049(cell cycle);GO:0007165(signal transduction)	04392(Hippo signaling pathway - multiple species)	K09851	NA
1	ENSG00000140497	SCAMP2	1.34968	1.08986	0.308468	1.97495e-81	8.57801e-77	secretory carrier membrane protein 2 [Source:HGNC Symbol;Acc:HGNC:10564]	GO:0000139(Golgi membrane);GO:0005515(protein binding);GO:0005768(endosome);GO:0005794(Golgi apparatus);GO:0006892(post-Golgi vesicle-mediated transport);GO:0015031(protein transport);GO:0016020(membrane);GO:0016021(integral component of membrane);GO:0030133(transport vesicle);GO:0032588(trans-Golgi network membrane);GO:0043231(intracellular membrane-bounded organelle);GO:0055038(recycling endoso…	NA	K19995	NA
1	ENSG00000158417	EIF5B	2.16288	1.74374	0.31077	1.36034e-79	5.90852e-75	eukaryotic translation initiation factor 5B [Source:HGNC Symbol;Acc:HGNC:30793]	GO:0000166(nucleotide binding);GO:0003723(RNA binding);GO:0003743(translation initiation factor activity);GO:0003924(GTPase activity);GO:0005515(protein binding);GO:0005525(GTP binding);GO:0005737(cytoplasm);GO:0005829(cytosol);GO:0006412(translation);GO:0006413(translational initiation);GO:0006446(regulation of translational initiation);GO:0016787(hydrolase activity);GO:0046872(metal ion binding)	03013(RNA transport)	K03243	NA
1	ENSG00000282608	ADORA3	0.378916	0.309393	0.292437	3.14272e-79	1.36501e-74	adenosine A3 receptor [Source:HGNC Symbol;Acc:HGNC:268]	GO:0001609(G protein-coupled adenosine receptor activity);GO:0001973(adenosine receptor signaling pathway);GO:0004930(G protein-coupled receptor activity);GO:0005886(plasma membrane);GO:0005887(integral component of plasma membrane);GO:0006954(inflammatory response);GO:0007165(signal transduction);GO:0007186(G protein-coupled receptor signaling pathway);GO:0007190(activation of adenylate cyclase …	04022(cGMP-PKG signaling pathway);04071(Sphingolipid signaling pathway);04080(Neuroactive ligand-receptor interaction)	NA	NA
1	ENSG00000176974	SHMT1	0.388142	0.311984	0.315112	9.22995e-79	4.00894e-74	serine hydroxymethyltransferase 1 [Source:HGNC Symbol;Acc:HGNC:10850]	GO:0000900(translation repressor activity, mRNA regulatory element binding);GO:0003824(catalytic activity);GO:0004372(glycine hydroxymethyltransferase activity);GO:0004843(thiol-dependent ubiquitin-specific protease activity);GO:0005515(protein binding);GO:0005634(nucleus);GO:0005737(cytoplasm);GO:0005829(cytosol);GO:0006231(dTMP biosynthetic process);GO:0006544(glycine metabolic process);GO:0006…	00260(Glycine, serine and threonine metabolism);00630(Glyoxylate and dicarboxylate metabolism);00670(One carbon pool by folate);01523(Antifolate resistance)	NA	NA
1	ENSG00000127022	CANX	4.85279	3.9379	0.301387	1.34088e-78	5.824e-74	calnexin [Source:HGNC Symbol;Acc:HGNC:1473]	GO:0002474(antigen processing and presentation of peptide antigen via MHC class I);GO:0003723(RNA binding);GO:0005509(calcium ion binding);GO:0005515(protein binding);GO:0005737(cytoplasm);GO:0005783(endoplasmic reticulum);GO:0005788(endoplasmic reticulum lumen);GO:0005789(endoplasmic reticulum membrane);GO:0005790(smooth endoplasmic reticulum);GO:0005791(rough endoplasmic reticulum);GO:0005840(r…	04141(Protein processing in endoplasmic reticulum);04145(Phagosome);04612(Antigen processing and presentation);04918(Thyroid hormone synthesis);05166(Human T-cell leukemia virus 1 infection)	NA	NA
1	ENSG00000085063	CD59	0.67492	0.543172	0.313307	1.4492e-78	6.29445e-74	CD59 molecule (CD59 blood group) [Source:HGNC Symbol;Acc:HGNC:1689]	GO:0000139(Golgi membrane);GO:0001848(complement binding);GO:0001971(negative regulation of activation of membrane attack complex);GO:0005515(protein binding);GO:0005576(extracellular region);GO:0005615(extracellular space);GO:0005789(endoplasmic reticulum membrane);GO:0005886(plasma membrane);GO:0005925(focal adhesion);GO:0006888(endoplasmic reticulum to Golgi vesicle-mediated transport);GO:0007…	04610(Complement and coagulation cascades);04640(Hematopoietic cell lineage)	NA	NA
1	ENSG00000164405	UQCRQ	2.26948	1.86394	0.284003	2.03623e-78	8.84416e-74	ubiquinol-cytochrome c reductase complex III subunit VII [Source:HGNC Symbol;Acc:HGNC:29594]	GO:0005739(mitochondrion);GO:0005743(mitochondrial inner membrane);GO:0005750(mitochondrial respiratory chain complex III);GO:0006122(mitochondrial electron transport, ubiquinol to cytochrome c);GO:0008121(ubiquinol-cytochrome-c reductase activity);GO:0016020(membrane);GO:0021539(subthalamus development);GO:0021548(pons development);GO:0021680(cerebellar Purkinje cell layer development);GO:002176…	00190(Oxidative phosphorylation);04260(Cardiac muscle contraction);04714(Thermogenesis);04932(Non-alcoholic fatty liver disease (NAFLD));05010(Alzheimer disease);05012(Parkinson disease);05016(Huntington disease)	K00418	NA
1	ENSG00000128595	CALU	1.07314	0.894795	0.262208	6.85674e-78	2.97815e-73	calumenin [Source:HGNC Symbol;Acc:HGNC:1458]	GO:0005509(calcium ion binding);GO:0005515(protein binding);GO:0005576(extracellular region);GO:0005783(endoplasmic reticulum);GO:0005788(endoplasmic reticulum lumen);GO:0005789(endoplasmic reticulum membrane);GO:0005794(Golgi apparatus);GO:0008150(biological_process);GO:0016020(membrane);GO:0016529(sarcoplasmic reticulum);GO:0033018(sarcoplasmic reticulum lumen);GO:0042470(melanosome);GO:0043687…	NA	NA	NA
1	ENSG00000054148	PHPT1	2.24364	1.82133	0.300844	2.85579e-77	1.24038e-72	phosphohistidine phosphatase 1 [Source:HGNC Symbol;Acc:HGNC:30033]	GO:0004721(phosphoprotein phosphatase activity);GO:0005515(protein binding);GO:0005737(cytoplasm);GO:0005829(cytosol);GO:0006470(protein dephosphorylation);GO:0016787(hydrolase activity);GO:0019855(calcium channel inhibitor activity);GO:0035774(positive regulation of insulin secretion involved in cellular response to glucose stimulus);GO:0035971(peptidyl-histidine dephosphorylation);GO:0044325(io…	NA	K01112	EC:3.9.1.3
1	ENSG00000155115	GTF3C6	1.36337	1.13348	0.266419	3.51518e-76	1.52678e-71	general transcription factor IIIC subunit 6 [Source:HGNC Symbol;Acc:HGNC:20872]	GO:0000127(transcription factor TFIIIC complex);GO:0003677(DNA binding);GO:0005515(protein binding);GO:0005634(nucleus);GO:0005654(nucleoplasm);GO:0006383(transcription by RNA polymerase III);GO:0016604(nuclear body);GO:0042791(5S class rRNA transcription by RNA polymerase III);GO:0042797(tRNA transcription by RNA polymerase III)	NA	K15203	NA
1	ENSG00000137288	UQCC2	0.83087	0.690674	0.266617	4.45727e-76	1.93597e-71	ubiquinol-cytochrome c reductase complex assembly factor 2 [Source:HGNC Symbol;Acc:HGNC:21237]	GO:0002082(regulation of oxidative phosphorylation);GO:0005515(protein binding);GO:0005739(mitochondrion);GO:0005743(mitochondrial inner membrane);GO:0005758(mitochondrial intermembrane space);GO:0005759(mitochondrial matrix);GO:0016020(membrane);GO:0016604(nuclear body);GO:0034551(mitochondrial respiratory chain complex III assembly);GO:0042645(mitochondrial nucleoid);GO:0050796(regulation of in…	NA	K17682	NA
1	ENSG00000138821	SLC39A8	2.72997	1.97351	0.46812	5.11654e-75	2.22232e-70	solute carrier family 39 member 8 [Source:HGNC Symbol;Acc:HGNC:20862]	GO:0005385(zinc ion transmembrane transporter activity);GO:0005886(plasma membrane);GO:0005887(integral component of plasma membrane);GO:0006811(ion transport);GO:0006829(zinc ion transport);GO:0006882(cellular zinc ion homeostasis);GO:0016020(membrane);GO:0016021(integral component of membrane);GO:0030001(metal ion transport);GO:0031090(organelle membrane);GO:0046873(metal ion transmembrane tran…	04216(Ferroptosis)	K14714	NA
1	ENSG00000103876	FAH	0.539108	0.449998	0.260654	5.21365e-75	2.2645e-70	fumarylacetoacetate hydrolase [Source:HGNC Symbol;Acc:HGNC:3579]	GO:0003824(catalytic activity);GO:0004334(fumarylacetoacetase activity);GO:0005515(protein binding);GO:0005829(cytosol);GO:0006527(arginine catabolic process);GO:0006559(L-phenylalanine catabolic process);GO:0006572(tyrosine catabolic process);GO:0009072(aromatic amino acid family metabolic process);GO:0016787(hydrolase activity);GO:0046872(metal ion binding);GO:0070062(extracellular exosome);GO:…	00350(Tyrosine metabolism)	K01555	EC:3.7.1.2
1	ENSG00000164919	COX6C	2.66274	2.2113	0.268015	5.68045e-75	2.46724e-70	cytochrome c oxidase subunit 6C [Source:HGNC Symbol;Acc:HGNC:2285]	GO:0004129(cytochrome-c oxidase activity);GO:0005739(mitochondrion);GO:0005743(mitochondrial inner membrane);GO:0006091(generation of precursor metabolites and energy);GO:0006123(mitochondrial electron transport, cytochrome c to oxygen);GO:0016020(membrane);GO:0016021(integral component of membrane);GO:0022900(electron transport chain);GO:1902600(proton transmembrane transport)	00190(Oxidative phosphorylation);04260(Cardiac muscle contraction);04714(Thermogenesis);04932(Non-alcoholic fatty liver disease (NAFLD));05010(Alzheimer disease);05012(Parkinson disease);05016(Huntington disease)	NA	NA
1	ENSG00000142875	PRKACB	0.467345	0.385643	0.277222	6.55347e-75	2.84643e-70	protein kinase cAMP-activated catalytic subunit beta [Source:HGNC Symbol;Acc:HGNC:9381]	GO:0000166(nucleotide binding);GO:0000287(magnesium ion binding);GO:0001843(neural tube closure);GO:0002223(stimulatory C-type lectin receptor signaling pathway);GO:0003091(renal water homeostasis);GO:0004672(protein kinase activity);GO:0004674(protein serine/threonine kinase activity);GO:0004691(cAMP-dependent protein kinase activity);GO:0005515(protein binding);GO:0005524(ATP binding);GO:000563…	01522(Endocrine resistance);04010(MAPK signaling pathway);04014(Ras signaling pathway);04020(Calcium signaling pathway);04024(cAMP signaling pathway);04062(Chemokine signaling pathway);04114(Oocyte meiosis);04140(Autophagy - animal);04211(Longevity regulating pathway);04213(Longevity regulating pathway - multiple species);04261(Adrenergic signaling in cardiomyocytes);04270(Vascular smooth muscle …	NA	NA
1	ENSG00000010610	CD4	1.27782	1.02848	0.313178	8.70615e-75	3.78143e-70	CD4 molecule [Source:HGNC Symbol;Acc:HGNC:1678]	GO:0001618(virus receptor activity);GO:0001816(cytokine production);GO:0001934(positive regulation of protein phosphorylation);GO:0002250(adaptive immune response);GO:0002376(immune system process);GO:0004888(transmembrane signaling receptor activity);GO:0005102(signaling receptor binding);GO:0005201(extracellular matrix structural constituent);GO:0005515(protein binding);GO:0005769(early endosom…	04060(Cytokine-cytokine receptor interaction);04514(Cell adhesion molecules (CAMs));04612(Antigen processing and presentation);04640(Hematopoietic cell lineage);04658(Th1 and Th2 cell differentiation);04659(Th17 cell differentiation);04660(T cell receptor signaling pathway);05166(Human T-cell leukemia virus 1 infection);05170(Human immunodeficiency virus 1 infection);05340(Primary immunodeficienc…	NA	NA
1	ENSG00000173457	PPP1R14B	2.08487	1.66497	0.324465	3.08608e-73	1.34041e-68	protein phosphatase 1 regulatory inhibitor subunit 14B [Source:HGNC Symbol;Acc:HGNC:9057]	GO:0004864(protein phosphatase inhibitor activity);GO:0004865(protein serine/threonine phosphatase inhibitor activity);GO:0005737(cytoplasm);GO:0032515(negative regulation of phosphoprotein phosphatase activity);GO:0042325(regulation of phosphorylation);GO:0045087(innate immune response)	NA	K17555	NA
1	ENSG00000139687	RB1	1.33655	1.11401	0.26275	3.22288e-73	1.39983e-68	RB transcriptional corepressor 1 [Source:HGNC Symbol;Acc:HGNC:9884]	GO:0000082(G1/S transition of mitotic cell cycle);GO:0000122(negative regulation of transcription by RNA polymerase II);GO:0000785(chromatin);GO:0000987(proximal promoter sequence-specific DNA binding);GO:0001012(RNA polymerase II regulatory region DNA binding);GO:0001102(RNA polymerase II activating transcription factor binding);GO:0001558(regulation of cell growth);GO:0001894(tissue homeostasis…	01522(Endocrine resistance);04110(Cell cycle);04218(Cellular senescence);04934(Cushing syndrome);05160(Hepatitis C);05161(Hepatitis B);05163(Human cytomegalovirus infection);05165(Human papillomavirus infection);05166(Human T-cell leukemia virus 1 infection);05167(Kaposi sarcoma-associated herpesvirus infection);05169(Epstein-Barr virus infection);05200(Pathways in cancer);05203(Viral carcinogene…	K06618	NA
1	ENSG00000185088	RPS27L	3.26537	2.64261	0.305283	6.70244e-73	2.91114e-68	ribosomal protein S27 like [Source:HGNC Symbol;Acc:HGNC:18476]	GO:0000028(ribosomal small subunit assembly);GO:0003723(RNA binding);GO:0003735(structural constituent of ribosome);GO:0005515(protein binding);GO:0005622(intracellular);GO:0005634(nucleus);GO:0005840(ribosome);GO:0006412(translation);GO:0006919(activation of cysteine-type endopeptidase activity involved in apoptotic process);GO:0006978(DNA damage response, signal transduction by p53 class mediat…	03010(Ribosome)	K02978	NA
1	ENSG00000179271	GADD45GIP1	2.04951	1.68224	0.284895	8.33184e-73	3.61885e-68	GADD45G interacting protein 1 [Source:HGNC Symbol;Acc:HGNC:29996]	GO:0005515(protein binding);GO:0005634(nucleus);GO:0005739(mitochondrion);GO:0005759(mitochondrial matrix);GO:0005840(ribosome);GO:0007049(cell cycle);GO:0016032(viral process);GO:0070125(mitochondrial translational elongation);GO:0070126(mitochondrial translational termination);GO:0071850(mitotic cell cycle arrest)	NA	NA	NA
1	ENSG00000196262	PPIA	7.4421	6.19359	0.264934	5.00256e-72	2.17281e-67	peptidylprolyl isomerase A [Source:HGNC Symbol;Acc:HGNC:9253]	GO:0000413(protein peptidyl-prolyl isomerization);GO:0003723(RNA binding);GO:0003755(peptidyl-prolyl cis-trans isomerase activity);GO:0005515(protein binding);GO:0005576(extracellular region);GO:0005615(extracellular space);GO:0005634(nucleus);GO:0005737(cytoplasm);GO:0005829(cytosol);GO:0005925(focal adhesion);GO:0006278(RNA-dependent DNA biosynthetic process);GO:0006457(protein folding);GO:0016…	04217(Necroptosis)	NA	NA
1	ENSG00000181163	NPM1	4.13892	3.40339	0.282282	8.52986e-72	3.70486e-67	nucleophosmin 1 [Source:HGNC Symbol;Acc:HGNC:7910]	GO:0000055(ribosomal large subunit export from nucleus);GO:0000056(ribosomal small subunit export from nucleus);GO:0001047(core promoter binding);GO:0003676(nucleic acid binding);GO:0003682(chromatin binding);GO:0003713(transcription coactivator activity);GO:0003723(RNA binding);GO:0004860(protein kinase inhibitor activity);GO:0005515(protein binding);GO:0005634(nucleus);GO:0005654(nucleoplasm);G…	NA	K11276	NA
1	ENSG00000144674	GOLGA4	2.00042	1.58839	0.332739	3.76874e-71	1.63691e-66	golgin A4 [Source:HGNC Symbol;Acc:HGNC:4427]	GO:0000139(Golgi membrane);GO:0005515(protein binding);GO:0005737(cytoplasm);GO:0005794(Golgi apparatus);GO:0005802(trans-Golgi network);GO:0005829(cytosol);GO:0016020(membrane);GO:0016192(vesicle-mediated transport);GO:0043001(Golgi to plasma membrane protein transport);GO:0043231(intracellular membrane-bounded organelle);GO:0045773(positive regulation of axon extension);GO:0051020(GTPase bindin…	NA	K20283	NA
1	ENSG00000042753	AP2S1	5.67118	4.62332	0.294722	4.48541e-71	1.94819e-66	adaptor related protein complex 2 subunit sigma 1 [Source:HGNC Symbol;Acc:HGNC:565]	GO:0005215(transporter activity);GO:0005515(protein binding);GO:0005829(cytosol);GO:0005886(plasma membrane);GO:0005905(clathrin-coated pit);GO:0006886(intracellular protein transport);GO:0006897(endocytosis);GO:0008565(protein transporter activity);GO:0015031(protein transport);GO:0016020(membrane);GO:0016192(vesicle-mediated transport);GO:0019886(antigen processing and presentation of exogenous…	04144(Endocytosis);04721(Synaptic vesicle cycle);04961(Endocrine and other factor-regulated calcium reabsorption);05016(Huntington disease)	NA	NA
1	ENSG00000146409	SLC18B1	0.301589	0.251838	0.260091	8.705e-71	3.78093e-66	solute carrier family 18 member B1 [Source:HGNC Symbol;Acc:HGNC:21573]	GO:0005215(transporter activity);GO:0016020(membrane);GO:0016021(integral component of membrane);GO:0055085(transmembrane transport)	NA	NA	NA
1	ENSG00000143870	PDIA6	2.62696	2.06232	0.349123	4.78523e-70	2.07841e-65	protein disulfide isomerase family A member 6 [Source:HGNC Symbol;Acc:HGNC:30168]	GO:0003756(protein disulfide isomerase activity);GO:0005515(protein binding);GO:0005615(extracellular space);GO:0005623(cell);GO:0005783(endoplasmic reticulum);GO:0005788(endoplasmic reticulum lumen);GO:0005789(endoplasmic reticulum membrane);GO:0005793(endoplasmic reticulum-Golgi intermediate compartment);GO:0005829(cytosol);GO:0005886(plasma membrane);GO:0006457(protein folding);GO:0015037(pept…	04141(Protein processing in endoplasmic reticulum)	K09584	EC:5.3.4.1
1	ENSG00000105711	SCN1B	0.394636	0.325483	0.277941	8.40916e-70	3.65243e-65	sodium voltage-gated channel beta subunit 1 [Source:HGNC Symbol;Acc:HGNC:10586]	GO:0001518(voltage-gated sodium channel complex);GO:0002028(regulation of sodium ion transport);GO:0005244(voltage-gated ion channel activity);GO:0005248(voltage-gated sodium channel activity);GO:0005272(sodium channel activity);GO:0005515(protein binding);GO:0005576(extracellular region);GO:0005886(plasma membrane);GO:0005887(integral component of plasma membrane);GO:0006811(ion transport);GO:00…	04261(Adrenergic signaling in cardiomyocytes)	K04845	NA
1	ENSG00000146072	TNFRSF21	0.497179	0.413477	0.265958	3.79643e-69	1.64894e-64	TNF receptor superfamily member 21 [Source:HGNC Symbol;Acc:HGNC:13469]	GO:0001783(B cell apoptotic process);GO:0002250(adaptive immune response);GO:0002376(immune system process);GO:0005515(protein binding);GO:0005737(cytoplasm);GO:0005886(plasma membrane);GO:0005887(integral component of plasma membrane);GO:0006915(apoptotic process);GO:0006959(humoral immune response);GO:0007165(signal transduction);GO:0007413(axonal fasciculation);GO:0016020(membrane);GO:0016021(…	04060(Cytokine-cytokine receptor interaction)	K05157	NA
1	ENSG00000138640	FAM13A	0.820192	0.677206	0.276368	1.57808e-67	6.85425e-63	family with sequence similarity 13 member A [Source:HGNC Symbol;Acc:HGNC:19367]	GO:0005096(GTPase activator activity);GO:0005829(cytosol);GO:0007165(signal transduction);GO:0043547(positive regulation of GTPase activity);GO:0051056(regulation of small GTPase mediated signal transduction)	NA	NA	NA
1	ENSG00000168386	FILIP1L	1.19815	0.944383	0.343362	5.42669e-66	2.35703e-61	filamin A interacting protein 1 like [Source:HGNC Symbol;Acc:HGNC:24589]	GO:0003674(molecular_function);GO:0005634(nucleus);GO:0005737(cytoplasm);GO:0008150(biological_process);GO:0016020(membrane)	NA	NA	NA
1	ENSG00000172889	EGFL7	0.395795	0.328061	0.27079	2.62353e-64	1.1395e-59	EGF like domain multiple 7 [Source:HGNC Symbol;Acc:HGNC:20594]	GO:0001525(angiogenesis);GO:0001568(blood vessel development);GO:0001570(vasculogenesis);GO:0001938(positive regulation of endothelial cell proliferation);GO:0005102(signaling receptor binding);GO:0005509(calcium ion binding);GO:0005515(protein binding);GO:0005576(extracellular region);GO:0005615(extracellular space);GO:0007155(cell adhesion);GO:0007275(multicellular organism development);GO:0009…	NA	NA	NA
1	ENSG00000079950	STX7	1.06417	0.885445	0.26526	3.5081e-64	1.52371e-59	syntaxin 7 [Source:HGNC Symbol;Acc:HGNC:11442]	GO:0000149(SNARE binding);GO:0001772(immunological synapse);GO:0001916(positive regulation of T cell mediated cytotoxicity);GO:0005484(SNAP receptor activity);GO:0005515(protein binding);GO:0005764(lysosome);GO:0005765(lysosomal membrane);GO:0005768(endosome);GO:0005769(early endosome);GO:0005770(late endosome);GO:0005886(plasma membrane);GO:0006886(intracellular protein transport);GO:0006906(ves…	04130(SNARE interactions in vesicular transport);04145(Phagosome)	NA	NA
1	ENSG00000167004	PDIA3	4.31455	3.4575	0.319479	1.89852e-63	8.24603e-59	protein disulfide isomerase family A member 3 [Source:HGNC Symbol;Acc:HGNC:4606]	GO:0002474(antigen processing and presentation of peptide antigen via MHC class I);GO:0002479(antigen processing and presentation of exogenous peptide antigen via MHC class I, TAP-dependent);GO:0003723(RNA binding);GO:0003756(protein disulfide isomerase activity);GO:0004197(cysteine-type endopeptidase activity);GO:0004629(phospholipase C activity);GO:0005515(protein binding);GO:0005615(extracellu…	04141(Protein processing in endoplasmic reticulum);04612(Antigen processing and presentation);05163(Human cytomegalovirus infection);05168(Herpes simplex virus 1 infection);05169(Epstein-Barr virus infection);05170(Human immunodeficiency virus 1 infection)	K08056	EC:5.3.4.1
1	ENSG00000170515	PA2G4	2.20641	1.79186	0.300247	3.54591e-63	1.54013e-58	proliferation-associated 2G4 [Source:HGNC Symbol;Acc:HGNC:8550]	GO:0003676(nucleic acid binding);GO:0003677(DNA binding);GO:0003700(DNA-binding transcription factor activity);GO:0003723(RNA binding);GO:0005515(protein binding);GO:0005576(extracellular region);GO:0005634(nucleus);GO:0005730(nucleolus);GO:0005737(cytoplasm);GO:0006364(rRNA processing);GO:0006417(regulation of translation);GO:0007050(cell cycle arrest);GO:0008283(cell population proliferation);G…	NA	NA	NA
1	ENSG00000165092	ALDH1A1	0.454173	0.355293	0.354234	6.85375e-63	2.97686e-58	aldehyde dehydrogenase 1 family member A1 [Source:HGNC Symbol;Acc:HGNC:402]	GO:0000166(nucleotide binding);GO:0001523(retinoid metabolic process);GO:0001758(retinal dehydrogenase activity);GO:0004029(aldehyde dehydrogenase (NAD) activity);GO:0005096(GTPase activator activity);GO:0005497(androgen binding);GO:0005737(cytoplasm);GO:0005829(cytosol);GO:0006069(ethanol oxidation);GO:0006081(cellular aldehyde metabolic process);GO:0016491(oxidoreductase activity);GO:0016620(ox…	00830(Retinol metabolism)	NA	NA
1	ENSG00000167553	TUBA1C	3.04631	2.50584	0.281768	2.82248e-61	1.22592e-56	tubulin alpha 1c [Source:HGNC Symbol;Acc:HGNC:20768]	GO:0000166(nucleotide binding);GO:0000226(microtubule cytoskeleton organization);GO:0000278(mitotic cell cycle);GO:0003924(GTPase activity);GO:0005198(structural molecule activity);GO:0005200(structural constituent of cytoskeleton);GO:0005515(protein binding);GO:0005525(GTP binding);GO:0005634(nucleus);GO:0005737(cytoplasm);GO:0005856(cytoskeleton);GO:0005874(microtubule);GO:0005881(cytoplasmic m…	04145(Phagosome);04210(Apoptosis);04530(Tight junction);04540(Gap junction);05130(Pathogenic Escherichia coli infection)	K07374	NA
1	ENSG00000096060	FKBP5	4.16996	3.43117	0.281331	2.83949e-61	1.2333e-56	FKBP prolyl isomerase 5 [Source:HGNC Symbol;Acc:HGNC:3721]	GO:0000413(protein peptidyl-prolyl isomerization);GO:0003755(peptidyl-prolyl cis-trans isomerase activity);GO:0005515(protein binding);GO:0005528(FK506 binding);GO:0005634(nucleus);GO:0005654(nucleoplasm);GO:0005737(cytoplasm);GO:0005829(cytosol);GO:0006457(protein folding);GO:0009617(response to bacterium);GO:0016020(membrane);GO:0016853(isomerase activity);GO:0031072(heat shock protein binding)…	04915(Estrogen signaling pathway)	NA	NA
1	ENSG00000108561	C1QBP	1.00082	0.835501	0.260466	3.29521e-61	1.43124e-56	complement C1q binding protein [Source:HGNC Symbol;Acc:HGNC:1243]	GO:0000122(negative regulation of transcription by RNA polymerase II);GO:0001849(complement component C1q binding);GO:0002250(adaptive immune response);GO:0002376(immune system process);GO:0003714(transcription corepressor activity);GO:0003729(mRNA binding);GO:0005080(protein kinase C binding);GO:0005515(protein binding);GO:0005540(hyaluronic acid binding);GO:0005576(extracellular region);GO:0005…	NA	NA	NA
1	ENSG00000145431	PDGFC	0.411898	0.339884	0.277244	2.35916e-60	1.02468e-55	platelet derived growth factor C [Source:HGNC Symbol;Acc:HGNC:8801]	GO:0000139(Golgi membrane);GO:0005161(platelet-derived growth factor receptor binding);GO:0005515(protein binding);GO:0005576(extracellular region);GO:0005615(extracellular space);GO:0005634(nucleus);GO:0005737(cytoplasm);GO:0005788(endoplasmic reticulum lumen);GO:0005829(cytosol);GO:0005886(plasma membrane);GO:0007171(activation of transmembrane receptor protein tyrosine kinase activity);GO:0007…	01521(EGFR tyrosine kinase inhibitor resistance);04010(MAPK signaling pathway);04014(Ras signaling pathway);04015(Rap1 signaling pathway);04072(Phospholipase D signaling pathway);04151(PI3K-Akt signaling pathway);04510(Focal adhesion);04540(Gap junction);04810(Regulation of actin cytoskeleton);05215(Prostate cancer);05218(Melanoma);05231(Choline metabolism in cancer)	K05450	NA
1	ENSG00000145912	NHP2	1.26239	1.03998	0.279601	6.84944e-60	2.97499e-55	NHP2 ribonucleoprotein [Source:HGNC Symbol;Acc:HGNC:14377]	GO:0000469(cleavage involved in rRNA processing);GO:0000470(maturation of LSU-rRNA);GO:0000784(nuclear chromosome, telomeric region);GO:0003723(RNA binding);GO:0005515(protein binding);GO:0005634(nucleus);GO:0005654(nucleoplasm);GO:0005697(telomerase holoenzyme complex);GO:0005730(nucleolus);GO:0005732(small nucleolar ribonucleoprotein complex);GO:0006364(rRNA processing);GO:0007004(telomere main…	03008(Ribosome biogenesis in eukaryotes)	K11129	NA
1	ENSG00000183087	GAS6	0.457935	0.381408	0.263806	8.80449e-58	3.82414e-53	growth arrest specific 6 [Source:HGNC Symbol;Acc:HGNC:4168]	GO:0001764(neuron migration);GO:0001786(phosphatidylserine binding);GO:0001934(positive regulation of protein phosphorylation);GO:0001961(positive regulation of cytokine-mediated signaling pathway);GO:0002576(platelet degranulation);GO:0003104(positive regulation of glomerular filtration);GO:0005102(signaling receptor binding);GO:0005245(voltage-gated calcium channel activity);GO:0005509(calcium …	01521(EGFR tyrosine kinase inhibitor resistance)	NA	NA
1	ENSG00000140836	ZFHX3	1.75523	1.44768	0.277919	9.15967e-57	3.97841e-52	zinc finger homeobox 3 [Source:HGNC Symbol;Acc:HGNC:777]	GO:0000122(negative regulation of transcription by RNA polymerase II);GO:0000978(RNA polymerase II proximal promoter sequence-specific DNA binding);GO:0000981(DNA-binding transcription factor activity, RNA polymerase II-specific);GO:0001227(DNA-binding transcription repressor activity, RNA polymerase II-specific);GO:0003676(nucleic acid binding);GO:0003677(DNA binding);GO:0003700(DNA-binding tran…	04550(Signaling pathways regulating pluripotency of stem cells)	NA	NA
1	ENSG00000079819	EPB41L2	0.501359	0.411331	0.285544	2.12108e-55	9.21271e-51	erythrocyte membrane protein band 4.1 like 2 [Source:HGNC Symbol;Acc:HGNC:3379]	GO:0003779(actin binding);GO:0005198(structural molecule activity);GO:0005515(protein binding);GO:0005634(nucleus);GO:0005654(nucleoplasm);GO:0005737(cytoplasm);GO:0005829(cytosol);GO:0005856(cytoskeleton);GO:0005886(plasma membrane);GO:0005925(focal adhesion);GO:0005938(cell cortex);GO:0007049(cell cycle);GO:0008091(spectrin);GO:0008092(cytoskeletal protein binding);GO:0008180(COP9 signalosome);…	NA	K06107	NA
1	ENSG00000120738	EGR1	3.73332	2.90789	0.360488	3.5452e-54	1.53982e-49	early growth response 1 [Source:HGNC Symbol;Acc:HGNC:3238]	GO:0000122(negative regulation of transcription by RNA polymerase II);GO:0000976(transcription regulatory region sequence-specific DNA binding);GO:0000977(RNA polymerase II regulatory region sequence-specific DNA binding);GO:0000981(DNA-binding transcription factor activity, RNA polymerase II-specific);GO:0001228(DNA-binding transcription activator activity, RNA polymerase II-specific);GO:0001666…	04371(Apelin signaling pathway);04912(GnRH signaling pathway);04928(Parathyroid hormone synthesis, secretion and action);04933(AGE-RAGE signaling pathway in diabetic complications);05020(Prion diseases);05166(Human T-cell leukemia virus 1 infection)	NA	NA
1	ENSG00000143153	ATP1B1	0.533715	0.438272	0.284244	6.84823e-54	2.97446e-49	ATPase Na+/K+ transporting subunit beta 1 [Source:HGNC Symbol;Acc:HGNC:804]	GO:0001666(response to hypoxia);GO:0001671(ATPase activator activity);GO:0005391(sodium:potassium-exchanging ATPase activity);GO:0005515(protein binding);GO:0005524(ATP binding);GO:0005886(plasma membrane);GO:0005890(sodium:potassium-exchanging ATPase complex);GO:0005901(caveola);GO:0006811(ion transport);GO:0006813(potassium ion transport);GO:0006814(sodium ion transport);GO:0006874(cellular cal…	04022(cGMP-PKG signaling pathway);04024(cAMP signaling pathway);04260(Cardiac muscle contraction);04261(Adrenergic signaling in cardiomyocytes);04911(Insulin secretion);04918(Thyroid hormone synthesis);04919(Thyroid hormone signaling pathway);04925(Aldosterone synthesis and secretion);04960(Aldosterone-regulated sodium reabsorption);04961(Endocrine and other factor-regulated calcium reabsorption)…	NA	NA
1	ENSG00000165029	ABCA1	2.06086	1.70907	0.270039	1.08401e-52	4.70827e-48	ATP binding cassette subfamily A member 1 [Source:HGNC Symbol;Acc:HGNC:29]	GO:0000166(nucleotide binding);GO:0002790(peptide secretion);GO:0005102(signaling receptor binding);GO:0005319(lipid transporter activity);GO:0005515(protein binding);GO:0005524(ATP binding);GO:0005543(phospholipid binding);GO:0005548(phospholipid transporter activity);GO:0005789(endoplasmic reticulum membrane);GO:0005794(Golgi apparatus);GO:0005886(plasma membrane);GO:0005887(integral component …	02010(ABC transporters);04975(Fat digestion and absorption);04979(Cholesterol metabolism)	NA	NA
1	ENSG00000115053	NCL	4.79076	3.93834	0.282668	2.22876e-52	9.6804e-48	nucleolin [Source:HGNC Symbol;Acc:HGNC:7667]	GO:0001525(angiogenesis);GO:0003676(nucleic acid binding);GO:0003677(DNA binding);GO:0003723(RNA binding);GO:0005515(protein binding);GO:0005634(nucleus);GO:0005654(nucleoplasm);GO:0005730(nucleolus);GO:0005737(cytoplasm);GO:0005938(cell cortex);GO:0008022(protein C-terminus binding);GO:0016020(membrane);GO:0017148(negative regulation of translation);GO:0036464(cytoplasmic ribonucleoprotein granu…	05130(Pathogenic Escherichia coli infection)	K11294	NA
1	ENSG00000134531	EMP1	1.63996	1.36395	0.265866	4.35132e-52	1.88995e-47	epithelial membrane protein 1 [Source:HGNC Symbol;Acc:HGNC:3333]	GO:0005515(protein binding);GO:0005886(plasma membrane);GO:0007275(multicellular organism development);GO:0008219(cell death);GO:0008283(cell population proliferation);GO:0008544(epidermis development);GO:0016020(membrane);GO:0016021(integral component of membrane);GO:0016049(cell growth);GO:0032060(bleb assembly)	NA	NA	NA
1	ENSG00000106565	TMEM176B	1.09186	0.883359	0.305711	3.85129e-49	1.67277e-44	transmembrane protein 176B [Source:HGNC Symbol;Acc:HGNC:29596]	GO:0005634(nucleus);GO:0009887(animal organ morphogenesis);GO:0016020(membrane);GO:0016021(integral component of membrane);GO:0030154(cell differentiation);GO:0031965(nuclear membrane);GO:2001199(negative regulation of dendritic cell differentiation)	NA	NA	NA
1	ENSG00000072694	FCGR2B	0.684013	0.551877	0.309679	1.98644e-48	8.6279e-44	Fc fragment of IgG receptor IIb [Source:HGNC Symbol;Acc:HGNC:3618]	GO:0001540(amyloid-beta binding);GO:0001811(negative regulation of type I hypersensitivity);GO:0001814(negative regulation of antibody-dependent cellular cytotoxicity);GO:0002266(follicular dendritic cell activation);GO:0002313(mature B cell differentiation involved in immune response);GO:0002316(follicular B cell differentiation);GO:0002436(immune complex clearance by monocytes and macrophages);…	04145(Phagosome);04380(Osteoclast differentiation);04662(B cell receptor signaling pathway);04666(Fc gamma R-mediated phagocytosis);05150(Staphylococcus aureus infection);05152(Tuberculosis);05162(Measles)	NA	NA
1	ENSG00000166794	PPIB	4.16818	3.45386	0.271208	7.76548e-48	3.37286e-43	peptidylprolyl isomerase B [Source:HGNC Symbol;Acc:HGNC:9255]	GO:0000413(protein peptidyl-prolyl isomerization);GO:0003723(RNA binding);GO:0003755(peptidyl-prolyl cis-trans isomerase activity);GO:0005515(protein binding);GO:0005518(collagen binding);GO:0005634(nucleus);GO:0005783(endoplasmic reticulum);GO:0005788(endoplasmic reticulum lumen);GO:0005790(smooth endoplasmic reticulum);GO:0005925(focal adhesion);GO:0006457(protein folding);GO:0016018(cyclospori…	NA	NA	NA
1	ENSG00000149131	SERPING1	0.493585	0.41218	0.260022	1.93621e-46	8.40975e-42	serpin family G member 1 [Source:HGNC Symbol;Acc:HGNC:1228]	GO:0001869(negative regulation of complement activation, lectin pathway);GO:0002376(immune system process);GO:0002576(platelet degranulation);GO:0004867(serine-type endopeptidase inhibitor activity);GO:0005515(protein binding);GO:0005576(extracellular region);GO:0005615(extracellular space);GO:0006958(complement activation, classical pathway);GO:0007568(aging);GO:0007596(blood coagulation);GO:000…	04610(Complement and coagulation cascades);05133(Pertussis)	NA	NA
1	ENSG00000019582	CD74	14.5222	11.9126	0.285769	4.10473e-41	1.78285e-36	CD74 molecule [Source:HGNC Symbol;Acc:HGNC:1697]	GO:0000139(Golgi membrane);GO:0000187(activation of MAPK activity);GO:0001516(prostaglandin biosynthetic process);GO:0001540(amyloid-beta binding);GO:0001934(positive regulation of protein phosphorylation);GO:0001961(positive regulation of cytokine-mediated signaling pathway);GO:0002250(adaptive immune response);GO:0002376(immune system process);GO:0002606(positive regulation of dendritic cell an…	04612(Antigen processing and presentation);05152(Tuberculosis);05168(Herpes simplex virus 1 infection)	NA	NA
1	ENSG00000211592	IGKC	1.38256	1.07235	0.366571	7.35727e-23	3.19556e-18	immunoglobulin kappa constant [Source:HGNC Symbol;Acc:HGNC:5716]	NA	NA	NA	NA
2	ENSG00000163221	S100A12	22.3238	2.31202	3.27136	0	0	S100 calcium binding protein A12 [Source:HGNC Symbol;Acc:HGNC:10489]	GO:0002376(immune system process);GO:0002548(monocyte chemotaxis);GO:0005507(copper ion binding);GO:0005509(calcium ion binding);GO:0005515(protein binding);GO:0005576(extracellular region);GO:0005634(nucleus);GO:0005737(cytoplasm);GO:0005829(cytosol);GO:0005856(cytoskeleton);GO:0005886(plasma membrane);GO:0006805(xenobiotic metabolic process);GO:0006954(inflammatory response);GO:0008270(zinc ion…	NA	NA	NA
2	ENSG00000143546	S100A8	126.307	15.8347	2.99577	0	0	S100 calcium binding protein A8 [Source:HGNC Symbol;Acc:HGNC:10498]	GO:0001816(cytokine production);GO:0002224(toll-like receptor signaling pathway);GO:0002376(immune system process);GO:0002523(leukocyte migration involved in inflammatory response);GO:0002526(acute inflammatory response);GO:0002544(chronic inflammatory response);GO:0002793(positive regulation of peptide secretion);GO:0005509(calcium ion binding);GO:0005515(protein binding);GO:0005576(extracellula…	04657(IL-17 signaling pathway)	K21127	NA
2	ENSG00000163220	S100A9	222.976	31.2196	2.83636	0	0	S100 calcium binding protein A9 [Source:HGNC Symbol;Acc:HGNC:10499]	GO:0001816(cytokine production);GO:0002224(toll-like receptor signaling pathway);GO:0002376(immune system process);GO:0002523(leukocyte migration involved in inflammatory response);GO:0005509(calcium ion binding);GO:0005515(protein binding);GO:0005576(extracellular region);GO:0005615(extracellular space);GO:0005634(nucleus);GO:0005654(nucleoplasm);GO:0005737(cytoplasm);GO:0005829(cytosol);GO:0005…	04657(IL-17 signaling pathway)	K21128	NA
2	ENSG00000085265	FCN1	9.64719	2.05191	2.23314	0	0	ficolin 1 [Source:HGNC Symbol;Acc:HGNC:3623]	GO:0001664(G protein-coupled receptor binding);GO:0001867(complement activation, lectin pathway);GO:0002376(immune system process);GO:0002752(cell surface pattern recognition receptor signaling pathway);GO:0005515(protein binding);GO:0005576(extracellular region);GO:0005581(collagen trimer);GO:0005886(plasma membrane);GO:0006956(complement activation);GO:0007186(G protein-coupled receptor signali…	NA	NA	NA
2	ENSG00000090382	LYZ	44.161	9.97393	2.14654	0	0	lysozyme [Source:HGNC Symbol;Acc:HGNC:6740]	GO:0001895(retina homeostasis);GO:0003796(lysozyme activity);GO:0003824(catalytic activity);GO:0005576(extracellular region);GO:0005615(extracellular space);GO:0006954(inflammatory response);GO:0008152(metabolic process);GO:0016787(hydrolase activity);GO:0016798(hydrolase activity, acting on glycosyl bonds);GO:0019730(antimicrobial humoral response);GO:0019835(cytolysis);GO:0031640(killing of cel…	04970(Salivary secretion)	NA	NA
2	ENSG00000104918	RETN	10.0086	2.77387	1.85127	0	0	resistin [Source:HGNC Symbol;Acc:HGNC:20389]	GO:0005179(hormone activity);GO:0005576(extracellular region);GO:0005615(extracellular space);GO:0005634(nucleus);GO:0007568(aging);GO:0008150(biological_process);GO:0009612(response to mechanical stimulus);GO:0010469(regulation of signaling receptor activity);GO:0032868(response to insulin);GO:0035578(azurophil granule lumen);GO:0035580(specific granule lumen);GO:0043312(neutrophil degranulation…	NA	K13438	NA
2	ENSG00000115590	IL1R2	4.01223	1.19447	1.74804	0	0	interleukin 1 receptor type 2 [Source:HGNC Symbol;Acc:HGNC:5994]	GO:0004908(interleukin-1 receptor activity);GO:0004910(interleukin-1, type II, blocking receptor activity);GO:0005515(protein binding);GO:0005576(extracellular region);GO:0005737(cytoplasm);GO:0005886(plasma membrane);GO:0006955(immune response);GO:0010955(negative regulation of protein processing);GO:0016020(membrane);GO:0016021(integral component of membrane);GO:0019221(cytokine-mediated signal…	04060(Cytokine-cytokine receptor interaction);04640(Hematopoietic cell lineage);05146(Amoebiasis);05166(Human T-cell leukemia virus 1 infection);05202(Transcriptional misregulation in cancer);05215(Prostate cancer);05418(Fluid shear stress and atherosclerosis)	K04387	NA
2	ENSG00000257764	AC020656.1	3.53567	1.23985	1.51182	0	0	novel transcript, antisense to LYZ	NA	NA	NA	NA
2	ENSG00000128383	APOBEC3A	2.26185	0.824494	1.45592	0	0	apolipoprotein B mRNA editing enzyme catalytic subunit 3A [Source:HGNC Symbol;Acc:HGNC:17343]	GO:0002376(immune system process);GO:0003723(RNA binding);GO:0003824(catalytic activity);GO:0004126(cytidine deaminase activity);GO:0005515(protein binding);GO:0005634(nucleus);GO:0005737(cytoplasm);GO:0008270(zinc ion binding);GO:0009972(cytidine deamination);GO:0010529(negative regulation of transposition);GO:0016554(cytidine to uridine editing);GO:0016787(hydrolase activity);GO:0044356(clearan…	05170(Human immunodeficiency virus 1 infection)	K18750	EC:3.5.4.-
2	ENSG00000183019	MCEMP1	2.63134	1.03964	1.33971	0	0	mast cell expressed membrane protein 1 [Source:HGNC Symbol;Acc:HGNC:27291]	GO:0005886(plasma membrane);GO:0016020(membrane);GO:0016021(integral component of membrane);GO:0035579(specific granule membrane);GO:0043312(neutrophil degranulation);GO:0070821(tertiary granule membrane)	NA	NA	NA
2	ENSG00000185201	IFITM2	6.39029	2.78899	1.19614	0	0	interferon induced transmembrane protein 2 [Source:HGNC Symbol;Acc:HGNC:5413]	GO:0002376(immune system process);GO:0005886(plasma membrane);GO:0006955(immune response);GO:0009615(response to virus);GO:0016020(membrane);GO:0016021(integral component of membrane);GO:0032991(protein-containing complex);GO:0034341(response to interferon-gamma);GO:0035455(response to interferon-alpha);GO:0035456(response to interferon-beta);GO:0045071(negative regulation of viral genome replica…	NA	K06566	NA
2	ENSG00000163563	MNDA	5.84711	2.59138	1.17401	0	0	myeloid cell nuclear differentiation antigen [Source:HGNC Symbol;Acc:HGNC:7183]	GO:0002218(activation of innate immune response);GO:0003677(DNA binding);GO:0005515(protein binding);GO:0005576(extracellular region);GO:0005634(nucleus);GO:0005654(nucleoplasm);GO:0005730(nucleolus);GO:0005737(cytoplasm);GO:0006968(cellular defense response);GO:0006974(cellular response to DNA damage stimulus);GO:0030889(negative regulation of B cell proliferation);GO:0035458(cellular response t…	NA	NA	NA
2	ENSG00000196352	CD55	6.01739	2.74598	1.13181	0	0	CD55 molecule (Cromer blood group) [Source:HGNC Symbol;Acc:HGNC:2665]	GO:0000139(Golgi membrane);GO:0001618(virus receptor activity);GO:0002376(immune system process);GO:0005515(protein binding);GO:0005576(extracellular region);GO:0005886(plasma membrane);GO:0006888(endoplasmic reticulum to Golgi vesicle-mediated transport);GO:0006958(complement activation, classical pathway);GO:0007204(positive regulation of cytosolic calcium ion concentration);GO:0008289(lipid bi…	04610(Complement and coagulation cascades);04640(Hematopoietic cell lineage);05416(Viral myocarditis)	NA	NA
2	ENSG00000197249	SERPINA1	7.53958	3.46739	1.12063	0	0	serpin family A member 1 [Source:HGNC Symbol;Acc:HGNC:8941]	GO:0000139(Golgi membrane);GO:0002020(protease binding);GO:0002576(platelet degranulation);GO:0004867(serine-type endopeptidase inhibitor activity);GO:0005515(protein binding);GO:0005576(extracellular region);GO:0005615(extracellular space);GO:0005783(endoplasmic reticulum);GO:0005788(endoplasmic reticulum lumen);GO:0005794(Golgi apparatus);GO:0006888(endoplasmic reticulum to Golgi vesicle-mediat…	04610(Complement and coagulation cascades)	K03984	NA
2	ENSG00000076944	STXBP2	5.70579	2.6278	1.11857	0	0	syntaxin binding protein 2 [Source:HGNC Symbol;Acc:HGNC:11445]	GO:0001909(leukocyte mediated cytotoxicity);GO:0002576(platelet degranulation);GO:0005515(protein binding);GO:0005576(extracellular region);GO:0005829(cytosol);GO:0005886(plasma membrane);GO:0006887(exocytosis);GO:0006904(vesicle docking involved in exocytosis);GO:0015031(protein transport);GO:0016020(membrane);GO:0016021(integral component of membrane);GO:0016192(vesicle-mediated transport);GO:0…	NA	K15300	NA
2	ENSG00000021355	SERPINB1	5.13342	2.36908	1.11559	0	0	serpin family B member 1 [Source:HGNC Symbol;Acc:HGNC:3311]	GO:0004867(serine-type endopeptidase inhibitor activity);GO:0005576(extracellular region);GO:0005615(extracellular space);GO:0005737(cytoplasm);GO:0010466(negative regulation of peptidase activity);GO:0010951(negative regulation of endopeptidase activity);GO:0016020(membrane);GO:0030414(peptidase inhibitor activity);GO:0034774(secretory granule lumen);GO:0043312(neutrophil degranulation);GO:00620…	05146(Amoebiasis)	NA	NA
2	ENSG00000187116	LILRA5	1.83917	0.850367	1.1129	0	0	leukocyte immunoglobulin like receptor A5 [Source:HGNC Symbol;Acc:HGNC:16309]	GO:0002376(immune system process);GO:0005576(extracellular region);GO:0005886(plasma membrane);GO:0009986(cell surface);GO:0016020(membrane);GO:0016021(integral component of membrane);GO:0043410(positive regulation of MAPK cascade);GO:0045087(innate immune response);GO:0050718(positive regulation of interleukin-1 beta secretion);GO:0050729(positive regulation of inflammatory response);GO:0050867(…	04380(Osteoclast differentiation)	K06512	NA
2	ENSG00000188404	SELL	1.31052	0.626264	1.0653	0	0	selectin L [Source:HGNC Symbol;Acc:HGNC:10720]	GO:0002020(protease binding);GO:0005509(calcium ion binding);GO:0005515(protein binding);GO:0005886(plasma membrane);GO:0005887(integral component of plasma membrane);GO:0007155(cell adhesion);GO:0008201(heparin binding);GO:0009897(external side of plasma membrane);GO:0009986(cell surface);GO:0016020(membrane);GO:0016021(integral component of membrane);GO:0016339(calcium-dependent cell-cell adhes…	04514(Cell adhesion molecules (CAMs))	K06495	NA
2	ENSG00000163131	CTSS	14.7514	7.50484	0.974963	0	0	cathepsin S [Source:HGNC Symbol;Acc:HGNC:2545]	GO:0001968(fibronectin binding);GO:0002224(toll-like receptor signaling pathway);GO:0002250(adaptive immune response);GO:0004197(cysteine-type endopeptidase activity);GO:0005518(collagen binding);GO:0005576(extracellular region);GO:0005615(extracellular space);GO:0005764(lysosome);GO:0006508(proteolysis);GO:0006955(immune response);GO:0008233(peptidase activity);GO:0008234(cysteine-type peptidase…	04142(Lysosome);04145(Phagosome);04210(Apoptosis);04612(Antigen processing and presentation);05152(Tuberculosis)	NA	NA
2	ENSG00000122862	SRGN	50.2576	28.8892	0.798813	0	0	serglycin [Source:HGNC Symbol;Acc:HGNC:9361]	GO:0002576(platelet degranulation);GO:0005515(protein binding);GO:0005576(extracellular region);GO:0005615(extracellular space);GO:0005794(Golgi apparatus);GO:0006915(apoptotic process);GO:0008626(granzyme-mediated apoptotic signaling pathway);GO:0016485(protein processing);GO:0030502(negative regulation of bone mineralization);GO:0031093(platelet alpha granule lumen);GO:0031214(biomineral tissue…	NA	NA	NA
2	ENSG00000038427	VCAN	29.8454	17.2225	0.793215	0	0	versican [Source:HGNC Symbol;Acc:HGNC:2464]	GO:0001501(skeletal system development);GO:0001649(osteoblast differentiation);GO:0005509(calcium ion binding);GO:0005515(protein binding);GO:0005539(glycosaminoglycan binding);GO:0005540(hyaluronic acid binding);GO:0005576(extracellular region);GO:0005615(extracellular space);GO:0005788(endoplasmic reticulum lumen);GO:0005796(Golgi lumen);GO:0007155(cell adhesion);GO:0007275(multicellular organi…	04514(Cell adhesion molecules (CAMs))	NA	NA
2	ENSG00000170889	RPS9	29.9637	18.4975	0.695883	0	0	ribosomal protein S9 [Source:HGNC Symbol;Acc:HGNC:10442]	GO:0000184(nuclear-transcribed mRNA catabolic process, nonsense-mediated decay);GO:0003723(RNA binding);GO:0003735(structural constituent of ribosome);GO:0005515(protein binding);GO:0005622(intracellular);GO:0005634(nucleus);GO:0005654(nucleoplasm);GO:0005730(nucleolus);GO:0005737(cytoplasm);GO:0005829(cytosol);GO:0005840(ribosome);GO:0005925(focal adhesion);GO:0006364(rRNA processing);GO:0006412…	03010(Ribosome)	K02997	NA
2	ENSG00000155307	SAMSN1	5.84011	2.66531	1.13169	0	0	SAM domain, SH3 domain and nuclear localization signals 1 [Source:HGNC Symbol;Acc:HGNC:10528]	GO:0001726(ruffle);GO:0001784(phosphotyrosine residue binding);GO:0002820(negative regulation of adaptive immune response);GO:0003723(RNA binding);GO:0005515(protein binding);GO:0005634(nucleus);GO:0005737(cytoplasm);GO:0005829(cytosol);GO:0005886(plasma membrane);GO:0042995(cell projection);GO:0050732(negative regulation of peptidyl-tyrosine phosphorylation);GO:0050869(negative regulation of B c…	NA	NA	NA
2	ENSG00000103187	COTL1	11.3719	6.7178	0.759413	5.10821e-306	2.2187e-301	coactosin like F-actin binding protein 1 [Source:HGNC Symbol;Acc:HGNC:18304]	GO:0003779(actin binding);GO:0005515(protein binding);GO:0005576(extracellular region);GO:0005622(intracellular);GO:0005634(nucleus);GO:0005737(cytoplasm);GO:0005856(cytoskeleton);GO:0008150(biological_process);GO:0019899(enzyme binding);GO:0034774(secretory granule lumen);GO:0043312(neutrophil degranulation);GO:0050832(defense response to fungus);GO:0070062(extracellular exosome);GO:1904813(fico…	NA	NA	NA
2	ENSG00000123689	G0S2	16.3247	6.00281	1.44335	2.06454e-300	8.96714e-296	G0/G1 switch 2 [Source:HGNC Symbol;Acc:HGNC:30229]	GO:0003674(molecular_function);GO:0005515(protein binding);GO:0005739(mitochondrion);GO:0005811(lipid droplet);GO:0006915(apoptotic process);GO:0019216(regulation of lipid metabolic process);GO:0097191(extrinsic apoptotic signaling pathway);GO:0120162(positive regulation of cold-induced thermogenesis);GO:2001238(positive regulation of extrinsic apoptotic signaling pathway)	NA	NA	NA
2	ENSG00000196154	S100A4	31.796	19.3811	0.714196	3.7485e-290	1.62813e-285	S100 calcium binding protein A4 [Source:HGNC Symbol;Acc:HGNC:10494]	GO:0001837(epithelial to mesenchymal transition);GO:0003723(RNA binding);GO:0003779(actin binding);GO:0005509(calcium ion binding);GO:0005515(protein binding);GO:0005576(extracellular region);GO:0005615(extracellular space);GO:0005634(nucleus);GO:0042802(identical protein binding);GO:0043005(neuron projection);GO:0043123(positive regulation of I-kappaB kinase/NF-kappaB signaling);GO:0046872(metal…	NA	NA	NA
2	ENSG00000171051	FPR1	5.28346	2.76091	0.936339	1.12215e-285	4.87394e-281	formyl peptide receptor 1 [Source:HGNC Symbol;Acc:HGNC:3826]	GO:0000187(activation of MAPK activity);GO:0001664(G protein-coupled receptor binding);GO:0002430(complement receptor mediated signaling pathway);GO:0004930(G protein-coupled receptor activity);GO:0004982(N-formyl peptide receptor activity);GO:0005124(scavenger receptor binding);GO:0005515(protein binding);GO:0005737(cytoplasm);GO:0005886(plasma membrane);GO:0006935(chemotaxis);GO:0006954(inflamm…	04015(Rap1 signaling pathway);04080(Neuroactive ligand-receptor interaction);05150(Staphylococcus aureus infection)	NA	NA
2	ENSG00000163931	TKT	4.71128	2.58936	0.863524	1.20963e-270	5.25389e-266	transketolase [Source:HGNC Symbol;Acc:HGNC:11834]	GO:0003824(catalytic activity);GO:0004802(transketolase activity);GO:0005515(protein binding);GO:0005654(nucleoplasm);GO:0005777(peroxisome);GO:0005829(cytosol);GO:0005999(xylulose biosynthetic process);GO:0006098(pentose-phosphate shunt);GO:0009052(pentose-phosphate shunt, non-oxidative branch);GO:0016604(nuclear body);GO:0016607(nuclear speck);GO:0016740(transferase activity);GO:0031982(vesicle…	00030(Pentose phosphate pathway)	K00615	EC:2.2.1.1
2	ENSG00000145287	PLAC8	0.952671	0.512209	0.895245	5.55895e-269	2.41447e-264	placenta specific 8 [Source:HGNC Symbol;Acc:HGNC:19254]	GO:0003682(chromatin binding);GO:0005576(extracellular region);GO:0008284(positive regulation of cell population proliferation);GO:0009409(response to cold);GO:0035578(azurophil granule lumen);GO:0040015(negative regulation of multicellular organism growth);GO:0042742(defense response to bacterium);GO:0043066(negative regulation of apoptotic process);GO:0043312(neutrophil degranulation);GO:004594…	NA	NA	NA
2	ENSG00000133112	TPT1	65.6181	49.3884	0.409921	3.44097e-268	1.49455e-263	tumor protein, translationally-controlled 1 [Source:HGNC Symbol;Acc:HGNC:12022]	GO:0000922(spindle pole);GO:0003723(RNA binding);GO:0005509(calcium ion binding);GO:0005515(protein binding);GO:0005615(extracellular space);GO:0005634(nucleus);GO:0005737(cytoplasm);GO:0005771(multivesicular body);GO:0005829(cytosol);GO:0005881(cytoplasmic microtubule);GO:0006816(calcium ion transport);GO:0006874(cellular calcium ion homeostasis);GO:0009615(response to virus);GO:0042981(regulati…	NA	NA	NA
2	ENSG00000158825	CDA	1.12502	0.608125	0.88751	8.73706e-267	3.79485e-262	cytidine deaminase [Source:HGNC Symbol;Acc:HGNC:1712]	GO:0001882(nucleoside binding);GO:0003824(catalytic activity);GO:0004126(cytidine deaminase activity);GO:0005515(protein binding);GO:0005576(extracellular region);GO:0005829(cytosol);GO:0007166(cell surface receptor signaling pathway);GO:0008270(zinc ion binding);GO:0008655(pyrimidine-containing compound salvage);GO:0009972(cytidine deamination);GO:0016787(hydrolase activity);GO:0019858(cytosine …	00240(Pyrimidine metabolism);00983(Drug metabolism - other enzymes)	NA	NA
2	ENSG00000121552	CSTA	2.31071	1.23404	0.904951	2.56748e-254	1.11516e-249	cystatin A [Source:HGNC Symbol;Acc:HGNC:2481]	GO:0001533(cornified envelope);GO:0002020(protease binding);GO:0004866(endopeptidase inhibitor activity);GO:0004869(cysteine-type endopeptidase inhibitor activity);GO:0005198(structural molecule activity);GO:0005615(extracellular space);GO:0005622(intracellular);GO:0005634(nucleus);GO:0005737(cytoplasm);GO:0005829(cytosol);GO:0007155(cell adhesion);GO:0010466(negative regulation of peptidase acti…	NA	K13907	NA
2	ENSG00000116741	RGS2	7.28262	3.56046	1.0324	6.67381e-251	2.8987e-246	regulator of G protein signaling 2 [Source:HGNC Symbol;Acc:HGNC:9998]	GO:0001965(G-protein alpha-subunit binding);GO:0001975(response to amphetamine);GO:0003924(GTPase activity);GO:0005096(GTPase activator activity);GO:0005515(protein binding);GO:0005516(calmodulin binding);GO:0005634(nucleus);GO:0005730(nucleolus);GO:0005737(cytoplasm);GO:0005739(mitochondrion);GO:0005829(cytosol);GO:0005886(plasma membrane);GO:0006417(regulation of translation);GO:0007049(cell cy…	04022(cGMP-PKG signaling pathway);04740(Olfactory transduction);04921(Oxytocin signaling pathway)	K18154	NA
2	ENSG00000121316	PLBD1	1.6732	0.850025	0.977036	2.29766e-243	9.97965e-239	phospholipase B domain containing 1 [Source:HGNC Symbol;Acc:HGNC:26215]	GO:0005615(extracellular space);GO:0005764(lysosome);GO:0005829(cytosol);GO:0006629(lipid metabolic process);GO:0006644(phospholipid metabolic process);GO:0016042(lipid catabolic process);GO:0016787(hydrolase activity);GO:0036149(phosphatidylinositol acyl-chain remodeling);GO:0036151(phosphatidylcholine acyl-chain remodeling);GO:0036152(phosphatidylethanolamine acyl-chain remodeling)	NA	NA	NA
2	ENSG00000105835	NAMPT	10.0031	5.70682	0.809684	2.06019e-233	8.94825e-229	nicotinamide phosphoribosyltransferase [Source:HGNC Symbol;Acc:HGNC:30092]	GO:0001774(microglial cell activation);GO:0003824(catalytic activity);GO:0004514(nicotinate-nucleotide diphosphorylase (carboxylating) activity);GO:0005125(cytokine activity);GO:0005515(protein binding);GO:0005576(extracellular region);GO:0005615(extracellular space);GO:0005634(nucleus);GO:0005737(cytoplasm);GO:0005829(cytosol);GO:0005886(plasma membrane);GO:0007165(signal transduction);GO:000726…	00760(Nicotinate and nicotinamide metabolism);04621(NOD-like receptor signaling pathway)	K03462	EC:2.4.2.12
2	ENSG00000059804	SLC2A3	3.63562	1.83654	0.985208	1.90542e-228	8.27602e-224	solute carrier family 2 member 3 [Source:HGNC Symbol;Acc:HGNC:11007]	GO:0005215(transporter activity);GO:0005355(glucose transmembrane transporter activity);GO:0005536(glucose binding);GO:0005886(plasma membrane);GO:0005887(integral component of plasma membrane);GO:0005975(carbohydrate metabolic process);GO:0008643(carbohydrate transport);GO:0016020(membrane);GO:0016021(integral component of membrane);GO:0019852(L-ascorbic acid metabolic process);GO:0022857(transm…	NA	K08142	NA
2	ENSG00000163041	H3F3A	15.8372	10.3809	0.609395	3.79993e-227	1.65046e-222	H3 histone family member 3A [Source:HGNC Symbol;Acc:HGNC:4764]	GO:0000183(chromatin silencing at rDNA);GO:0000228(nuclear chromosome);GO:0000784(nuclear chromosome, telomeric region);GO:0000786(nucleosome);GO:0000788(nuclear nucleosome);GO:0000979(RNA polymerase II core promoter sequence-specific DNA binding);GO:0000980(RNA polymerase II distal enhancer sequence-specific DNA binding);GO:0001649(osteoblast differentiation);GO:0001740(Barr body);GO:0003677(DNA…	05034(Alcoholism);05202(Transcriptional misregulation in cancer);05322(Systemic lupus erythematosus)	K11253	NA
2	ENSG00000111913	RIPOR2	1.21762	0.639958	0.928017	1.63158e-225	7.08662e-221	RHO family interacting cell polarization regulator 2 [Source:HGNC Symbol;Acc:HGNC:13872]	GO:0005515(protein binding);GO:0005737(cytoplasm);GO:0005856(cytoskeleton);GO:0005886(plasma membrane);GO:0006935(chemotaxis);GO:0007155(cell adhesion);GO:0007162(negative regulation of cell adhesion);GO:0007275(multicellular organism development);GO:0007517(muscle organ development);GO:0007605(sensory perception of sound);GO:0009968(negative regulation of signal transduction);GO:0016020(membrane…	NA	NA	NA
2	ENSG00000076662	ICAM3	0.981194	0.57007	0.783398	8.08807e-225	3.51297e-220	intercellular adhesion molecule 3 [Source:HGNC Symbol;Acc:HGNC:5346]	GO:0002223(stimulatory C-type lectin receptor signaling pathway);GO:0005102(signaling receptor binding);GO:0005178(integrin binding);GO:0005515(protein binding);GO:0005886(plasma membrane);GO:0005887(integral component of plasma membrane);GO:0006909(phagocytosis);GO:0007155(cell adhesion);GO:0016020(membrane);GO:0016021(integral component of membrane);GO:0030198(extracellular matrix organization)…	04514(Cell adhesion molecules (CAMs))	NA	NA
2	ENSG00000140379	BCL2A1	9.55047	5.07546	0.912032	4.57978e-220	1.98918e-215	BCL2 related protein A1 [Source:HGNC Symbol;Acc:HGNC:991]	GO:0005515(protein binding);GO:0005737(cytoplasm);GO:0005741(mitochondrial outer membrane);GO:0006915(apoptotic process);GO:0007568(aging);GO:0008630(intrinsic apoptotic signaling pathway in response to DNA damage);GO:0021987(cerebral cortex development);GO:0042803(protein homodimerization activity);GO:0042981(regulation of apoptotic process);GO:0043066(negative regulation of apoptotic process);G…	04064(NF-kappa B signaling pathway);04210(Apoptosis);05202(Transcriptional misregulation in cancer);05221(Acute myeloid leukemia)	NA	NA
2	ENSG00000109321	AREG	8.02493	2.93754	1.44988	7.87903e-220	3.42218e-215	amphiregulin [Source:HGNC Symbol;Acc:HGNC:651]	GO:0000139(Golgi membrane);GO:0000165(MAPK cascade);GO:0005125(cytokine activity);GO:0005154(epidermal growth factor receptor binding);GO:0005515(protein binding);GO:0005576(extracellular region);GO:0005615(extracellular space);GO:0005634(nucleus);GO:0005737(cytoplasm);GO:0005789(endoplasmic reticulum membrane);GO:0006888(endoplasmic reticulum to Golgi vesicle-mediated transport);GO:0007165(signa…	04010(MAPK signaling pathway);04012(ErbB signaling pathway);04151(PI3K-Akt signaling pathway);04390(Hippo signaling pathway);05210(Colorectal cancer)	NA	NA
2	ENSG00000204525	HLA-C	11.0422	7.25947	0.605088	2.98003e-208	1.29435e-203	major histocompatibility complex, class I, C [Source:HGNC Symbol;Acc:HGNC:4933]	GO:0000139(Golgi membrane);GO:0002376(immune system process);GO:0002474(antigen processing and presentation of peptide antigen via MHC class I);GO:0002479(antigen processing and presentation of exogenous peptide antigen via MHC class I, TAP-dependent);GO:0002480(antigen processing and presentation of exogenous peptide antigen via MHC class I, TAP-independent);GO:0005515(protein binding);GO:000578…	04144(Endocytosis);04145(Phagosome);04218(Cellular senescence);04514(Cell adhesion molecules (CAMs));04612(Antigen processing and presentation);04650(Natural killer cell mediated cytotoxicity);04940(Type I diabetes mellitus);05163(Human cytomegalovirus infection);05165(Human papillomavirus infection);05166(Human T-cell leukemia virus 1 infection);05167(Kaposi sarcoma-associated herpesvirus infect…	K06751	NA
2	ENSG00000108107	RPL28	38.8423	27.5795	0.494032	6.81337e-208	2.95932e-203	ribosomal protein L28 [Source:HGNC Symbol;Acc:HGNC:10330]	GO:0000184(nuclear-transcribed mRNA catabolic process, nonsense-mediated decay);GO:0003723(RNA binding);GO:0003735(structural constituent of ribosome);GO:0005515(protein binding);GO:0005622(intracellular);GO:0005829(cytosol);GO:0005840(ribosome);GO:0006412(translation);GO:0006413(translational initiation);GO:0006614(SRP-dependent cotranslational protein targeting to membrane);GO:0016020(membrane)…	03010(Ribosome)	K02903	NA
2	ENSG00000147454	SLC25A37	5.26354	2.69879	0.96372	1.69441e-205	7.35952e-201	solute carrier family 25 member 37 [Source:HGNC Symbol;Acc:HGNC:29786]	GO:0005381(iron ion transmembrane transporter activity);GO:0005739(mitochondrion);GO:0005743(mitochondrial inner membrane);GO:0006811(ion transport);GO:0016020(membrane);GO:0016021(integral component of membrane);GO:0022857(transmembrane transporter activity);GO:0048250(iron import into the mitochondrion);GO:0055072(iron ion homeostasis);GO:0055085(transmembrane transport)	NA	K15113	NA
2	ENSG00000119535	CSF3R	1.86881	1.01744	0.877172	1.68187e-202	7.30502e-198	colony stimulating factor 3 receptor [Source:HGNC Symbol;Acc:HGNC:2439]	GO:0004896(cytokine receptor activity);GO:0004912(interleukin-3 receptor activity);GO:0005515(protein binding);GO:0005576(extracellular region);GO:0005886(plasma membrane);GO:0005887(integral component of plasma membrane);GO:0006952(defense response);GO:0007155(cell adhesion);GO:0007165(signal transduction);GO:0009897(external side of plasma membrane);GO:0016020(membrane);GO:0016021(integral comp…	04060(Cytokine-cytokine receptor interaction);04151(PI3K-Akt signaling pathway);04630(Jak-STAT signaling pathway);04640(Hematopoietic cell lineage);05200(Pathways in cancer)	NA	NA
2	ENSG00000234745	HLA-B	18.8327	13.4559	0.485009	1.53781e-197	6.67934e-193	major histocompatibility complex, class I, B [Source:HGNC Symbol;Acc:HGNC:4932]	GO:0000139(Golgi membrane);GO:0001916(positive regulation of T cell mediated cytotoxicity);GO:0002376(immune system process);GO:0002474(antigen processing and presentation of peptide antigen via MHC class I);GO:0002476(antigen processing and presentation of endogenous peptide antigen via MHC class Ib);GO:0002479(antigen processing and presentation of exogenous peptide antigen via MHC class I, TAP…	04144(Endocytosis);04145(Phagosome);04218(Cellular senescence);04514(Cell adhesion molecules (CAMs));04612(Antigen processing and presentation);04650(Natural killer cell mediated cytotoxicity);04940(Type I diabetes mellitus);05163(Human cytomegalovirus infection);05165(Human papillomavirus infection);05166(Human T-cell leukemia virus 1 infection);05167(Kaposi sarcoma-associated herpesvirus infect…	K06751	NA
2	ENSG00000117091	CD48	1.67946	0.94517	0.829353	1.74637e-195	7.5852e-191	CD48 molecule [Source:HGNC Symbol;Acc:HGNC:1683]	GO:0002819(regulation of adaptive immune response);GO:0003823(antigen binding);GO:0005515(protein binding);GO:0005886(plasma membrane);GO:0006952(defense response);GO:0016020(membrane);GO:0031225(anchored component of membrane);GO:0031226(intrinsic component of plasma membrane);GO:0038023(signaling receptor activity);GO:0045121(membrane raft);GO:0050900(leukocyte migration);GO:0070062(extracellul…	04650(Natural killer cell mediated cytotoxicity)	NA	NA
2	ENSG00000204482	LST1	5.76376	3.44772	0.741367	6.07748e-195	2.63969e-190	leukocyte specific transcript 1 [Source:HGNC Symbol;Acc:HGNC:14189]	GO:0000139(Golgi membrane);GO:0000902(cell morphogenesis);GO:0002376(immune system process);GO:0005737(cytoplasm);GO:0005794(Golgi apparatus);GO:0006955(immune response);GO:0008360(regulation of cell shape);GO:0009653(anatomical structure morphogenesis);GO:0012505(endomembrane system);GO:0016020(membrane);GO:0016021(integral component of membrane);GO:0016358(dendrite development);GO:0050672(negat…	NA	NA	NA
2	ENSG00000100079	LGALS2	0.578397	0.379541	0.607804	1.0004e-191	4.34515e-187	galectin 2 [Source:HGNC Symbol;Acc:HGNC:6562]	GO:0005515(protein binding);GO:0016936(galactoside binding);GO:0030246(carbohydrate binding)	NA	K10090	NA
2	ENSG00000011422	PLAUR	8.16554	4.72044	0.790628	1.96398e-190	8.53035e-186	plasminogen activator, urokinase receptor [Source:HGNC Symbol;Acc:HGNC:9053]	GO:0001934(positive regulation of protein phosphorylation);GO:0005102(signaling receptor binding);GO:0005515(protein binding);GO:0005576(extracellular region);GO:0005788(endoplasmic reticulum lumen);GO:0005789(endoplasmic reticulum membrane);GO:0005886(plasma membrane);GO:0005887(integral component of plasma membrane);GO:0005925(focal adhesion);GO:0006935(chemotaxis);GO:0007165(signal transductio…	04610(Complement and coagulation cascades);05205(Proteoglycans in cancer)	K03985	NA
2	ENSG00000116701	NCF2	3.41774	2.04826	0.738645	9.61725e-189	4.17716e-184	neutrophil cytosolic factor 2 [Source:HGNC Symbol;Acc:HGNC:7661]	GO:0001669(acrosomal vesicle);GO:0002479(antigen processing and presentation of exogenous peptide antigen via MHC class I, TAP-dependent);GO:0005515(protein binding);GO:0005730(nucleolus);GO:0005737(cytoplasm);GO:0005829(cytosol);GO:0006801(superoxide metabolic process);GO:0006909(phagocytosis);GO:0006968(cellular defense response);GO:0008022(protein C-terminus binding);GO:0009055(electron transf…	04145(Phagosome);04380(Osteoclast differentiation);04670(Leukocyte transendothelial migration);05140(Leishmaniasis);05418(Fluid shear stress and atherosclerosis)	K08010	NA
2	ENSG00000173812	EIF1	24.0596	17.0664	0.495459	1.1151e-186	4.84331e-182	eukaryotic translation initiation factor 1 [Source:HGNC Symbol;Acc:HGNC:3249]	GO:0003723(RNA binding);GO:0003743(translation initiation factor activity);GO:0005515(protein binding);GO:0005634(nucleus);GO:0005737(cytoplasm);GO:0006412(translation);GO:0006413(translational initiation);GO:0006446(regulation of translational initiation);GO:0008135(translation factor activity, RNA binding);GO:0009048(dosage compensation by inactivation of X chromosome);GO:0016282(eukaryotic 43S…	03013(RNA transport)	K03113	NA
2	ENSG00000111144	LTA4H	2.04664	1.13934	0.84506	8.25734e-186	3.58649e-181	leukotriene A4 hydrolase [Source:HGNC Symbol;Acc:HGNC:6710]	GO:0003723(RNA binding);GO:0004177(aminopeptidase activity);GO:0004301(epoxide hydrolase activity);GO:0004463(leukotriene-A4 hydrolase activity);GO:0005515(protein binding);GO:0005576(extracellular region);GO:0005634(nucleus);GO:0005654(nucleoplasm);GO:0005737(cytoplasm);GO:0005829(cytosol);GO:0006508(proteolysis);GO:0006691(leukotriene metabolic process);GO:0008233(peptidase activity);GO:0008237…	00590(Arachidonic acid metabolism)	K01254	EC:3.3.2.6
2	ENSG00000176788	BASP1	4.28478	2.18644	0.970637	4.8137e-184	2.09078e-179	brain abundant membrane attached signal protein 1 [Source:HGNC Symbol;Acc:HGNC:957]	GO:0003714(transcription corepressor activity);GO:0005515(protein binding);GO:0005634(nucleus);GO:0005737(cytoplasm);GO:0005856(cytoskeleton);GO:0005886(plasma membrane);GO:0007356(thorax and anterior abdomen determination);GO:0008180(COP9 signalosome);GO:0008406(gonad development);GO:0016020(membrane);GO:0016607(nuclear speck);GO:0019904(protein domain specific binding);GO:0021762(substantia nig…	NA	K17272	NA
2	ENSG00000137818	RPLP1	54.405	39.6944	0.454806	3.71201e-180	1.61227e-175	ribosomal protein lateral stalk subunit P1 [Source:HGNC Symbol;Acc:HGNC:10372]	GO:0000184(nuclear-transcribed mRNA catabolic process, nonsense-mediated decay);GO:0002181(cytoplasmic translation);GO:0003735(structural constituent of ribosome);GO:0005515(protein binding);GO:0005622(intracellular);GO:0005829(cytosol);GO:0005840(ribosome);GO:0005925(focal adhesion);GO:0006412(translation);GO:0006413(translational initiation);GO:0006414(translational elongation);GO:0006614(SRP-d…	03010(Ribosome)	K02942	NA
2	ENSG00000160593	JAML	1.13737	0.653759	0.798872	3.20366e-179	1.39148e-174	junction adhesion molecule like [Source:HGNC Symbol;Acc:HGNC:19084]	GO:0002376(immune system process);GO:0005178(integrin binding);GO:0005886(plasma membrane);GO:0005923(bicellular tight junction);GO:0007155(cell adhesion);GO:0007157(heterophilic cell-cell adhesion via plasma membrane cell adhesion molecules);GO:0016020(membrane);GO:0016021(integral component of membrane);GO:0030054(cell junction);GO:0030593(neutrophil chemotaxis);GO:0035696(monocyte extravasatio…	NA	NA	NA
2	ENSG00000000938	FGR	2.75418	1.58505	0.797096	6.24058e-179	2.71053e-174	FGR proto-oncogene, Src family tyrosine kinase [Source:HGNC Symbol;Acc:HGNC:3697]	GO:0000166(nucleotide binding);GO:0001784(phosphotyrosine residue binding);GO:0002376(immune system process);GO:0002768(immune response-regulating cell surface receptor signaling pathway);GO:0004672(protein kinase activity);GO:0004713(protein tyrosine kinase activity);GO:0004715(non-membrane spanning protein tyrosine kinase activity);GO:0005102(signaling receptor binding);GO:0005515(protein bindi…	04062(Chemokine signaling pathway)	K08891	EC:2.7.10.2
2	ENSG00000136167	LCP1	10.1195	6.75529	0.583047	4.9697e-174	2.15854e-169	lymphocyte cytosolic protein 1 [Source:HGNC Symbol;Acc:HGNC:6528]	GO:0001725(stress fiber);GO:0001726(ruffle);GO:0001891(phagocytic cup);GO:0002102(podosome);GO:0002286(T cell activation involved in immune response);GO:0003779(actin binding);GO:0005178(integrin binding);GO:0005509(calcium ion binding);GO:0005515(protein binding);GO:0005615(extracellular space);GO:0005737(cytoplasm);GO:0005829(cytosol);GO:0005856(cytoskeleton);GO:0005884(actin filament);GO:00058…	NA	K17276	NA
2	ENSG00000130755	GMFG	4.83192	3.06023	0.658956	1.01865e-173	4.4244e-169	glia maturation factor gamma [Source:HGNC Symbol;Acc:HGNC:4374]	GO:0003779(actin binding);GO:0004860(protein kinase inhibitor activity);GO:0005576(extracellular region);GO:0005622(intracellular);GO:0006468(protein phosphorylation);GO:0006469(negative regulation of protein kinase activity);GO:0008047(enzyme activator activity);GO:0008083(growth factor activity);GO:0010469(regulation of signaling receptor activity);GO:0030479(actin cortical patch);GO:0034316(ne…	NA	NA	NA
2	ENSG00000189067	LITAF	4.52343	2.70683	0.740812	3.83702e-168	1.66657e-163	lipopolysaccharide induced TNF factor [Source:HGNC Symbol;Acc:HGNC:16841]	GO:0000139(Golgi membrane);GO:0000978(RNA polymerase II proximal promoter sequence-specific DNA binding);GO:0001228(DNA-binding transcription activator activity, RNA polymerase II-specific);GO:0001817(regulation of cytokine production);GO:0003677(DNA binding);GO:0005515(protein binding);GO:0005634(nucleus);GO:0005654(nucleoplasm);GO:0005737(cytoplasm);GO:0005764(lysosome);GO:0005765(lysosomal mem…	04142(Lysosome)	K19363	NA
2	ENSG00000150977	RILPL2	3.83118	2.35544	0.701792	5.11761e-165	2.22278e-160	Rab interacting lysosomal protein like 2 [Source:HGNC Symbol;Acc:HGNC:28787]	GO:0003382(epithelial cell morphogenesis);GO:0005737(cytoplasm);GO:0005813(centrosome);GO:0005815(microtubule organizing center);GO:0005829(cytosol);GO:0005856(cytoskeleton);GO:0005929(cilium);GO:0015031(protein transport);GO:0016020(membrane);GO:0031267(small GTPase binding);GO:0036064(ciliary basal body);GO:0042802(identical protein binding);GO:0042995(cell projection);GO:0046983(protein dimeri…	NA	NA	NA
2	ENSG00000113070	HBEGF	5.37027	3.03175	0.824843	1.71666e-163	7.45616e-159	heparin binding EGF like growth factor [Source:HGNC Symbol;Acc:HGNC:3059]	GO:0000165(MAPK cascade);GO:0005154(epidermal growth factor receptor binding);GO:0005576(extracellular region);GO:0005615(extracellular space);GO:0005886(plasma membrane);GO:0005887(integral component of plasma membrane);GO:0007165(signal transduction);GO:0007173(epidermal growth factor receptor signaling pathway);GO:0007517(muscle organ development);GO:0008016(regulation of heart contraction);GO…	01522(Endocrine resistance);04012(ErbB signaling pathway);04912(GnRH signaling pathway);04915(Estrogen signaling pathway);04928(Parathyroid hormone synthesis, secretion and action);05120(Epithelial cell signaling in Helicobacter pylori infection);05205(Proteoglycans in cancer);05219(Bladder cancer)	K08523	NA
2	ENSG00000172322	CLEC12A	1.28103	0.75474	0.763248	5.62915e-163	2.44496e-158	C-type lectin domain family 12 member A [Source:HGNC Symbol;Acc:HGNC:31713]	GO:0005886(plasma membrane);GO:0016020(membrane);GO:0016021(integral component of membrane);GO:0030246(carbohydrate binding);GO:0035579(specific granule membrane);GO:0043312(neutrophil degranulation);GO:0070821(tertiary granule membrane)	NA	K17516	NA
2	ENSG00000137801	THBS1	13.1299	6.57539	0.99771	1.31184e-162	5.69786e-158	thrombospondin 1 [Source:HGNC Symbol;Acc:HGNC:11785]	GO:0000187(activation of MAPK activity);GO:0001666(response to hypoxia);GO:0001786(phosphatidylserine binding);GO:0001937(negative regulation of endothelial cell proliferation);GO:0001953(negative regulation of cell-matrix adhesion);GO:0001968(fibronectin binding);GO:0002040(sprouting angiogenesis);GO:0002544(chronic inflammatory response);GO:0002576(platelet degranulation);GO:0002581(negative re…	04015(Rap1 signaling pathway);04115(p53 signaling pathway);04145(Phagosome);04151(PI3K-Akt signaling pathway);04350(TGF-beta signaling pathway);04510(Focal adhesion);04512(ECM-receptor interaction);05144(Malaria);05165(Human papillomavirus infection);05205(Proteoglycans in cancer);05206(MicroRNAs in cancer);05219(Bladder cancer)	K16857	NA
2	ENSG00000214212	C19orf38	0.82338	0.529296	0.637485	2.58568e-157	1.12306e-152	chromosome 19 open reading frame 38 [Source:HGNC Symbol;Acc:HGNC:34073]	GO:0016020(membrane);GO:0016021(integral component of membrane)	NA	NA	NA
2	ENSG00000198918	RPL39	22.4466	16.3663	0.455769	4.3201e-157	1.87639e-152	ribosomal protein L39 [Source:HGNC Symbol;Acc:HGNC:10350]	GO:0000184(nuclear-transcribed mRNA catabolic process, nonsense-mediated decay);GO:0002181(cytoplasmic translation);GO:0002227(innate immune response in mucosa);GO:0003723(RNA binding);GO:0003735(structural constituent of ribosome);GO:0005615(extracellular space);GO:0005622(intracellular);GO:0005829(cytosol);GO:0005840(ribosome);GO:0006412(translation);GO:0006413(translational initiation);GO:0006…	03010(Ribosome)	K02924	NA
2	ENSG00000081237	PTPRC	5.85729	3.88672	0.591681	2.21578e-153	9.62403e-149	protein tyrosine phosphatase, receptor type C [Source:HGNC Symbol;Acc:HGNC:9666]	GO:0000187(activation of MAPK activity);GO:0001779(natural killer cell differentiation);GO:0001915(negative regulation of T cell mediated cytotoxicity);GO:0001916(positive regulation of T cell mediated cytotoxicity);GO:0001960(negative regulation of cytokine-mediated signaling pathway);GO:0002244(hematopoietic progenitor cell differentiation);GO:0002378(immunoglobulin biosynthetic process);GO:000…	04514(Cell adhesion molecules (CAMs));04660(T cell receptor signaling pathway);04666(Fc gamma R-mediated phagocytosis);05340(Primary immunodeficiency)	K06478	EC:3.1.3.48
2	ENSG00000164587	RPS14	29.396	21.1545	0.474654	5.46008e-153	2.37153e-148	ribosomal protein S14 [Source:HGNC Symbol;Acc:HGNC:10387]	GO:0000028(ribosomal small subunit assembly);GO:0000122(negative regulation of transcription by RNA polymerase II);GO:0000184(nuclear-transcribed mRNA catabolic process, nonsense-mediated decay);GO:0000462(maturation of SSU-rRNA from tricistronic rRNA transcript (SSU-rRNA, 5.8S rRNA, LSU-rRNA));GO:0003723(RNA binding);GO:0003735(structural constituent of ribosome);GO:0005515(protein binding);GO:0…	03010(Ribosome)	K02955	NA
2	ENSG00000120129	DUSP1	21.3405	14.146	0.593198	2.96035e-152	1.2858e-147	dual specificity phosphatase 1 [Source:HGNC Symbol;Acc:HGNC:3064]	GO:0000188(inactivation of MAPK activity);GO:0004721(phosphoprotein phosphatase activity);GO:0004722(protein serine/threonine phosphatase activity);GO:0004725(protein tyrosine phosphatase activity);GO:0005515(protein binding);GO:0005634(nucleus);GO:0005737(cytoplasm);GO:0006470(protein dephosphorylation);GO:0007049(cell cycle);GO:0007162(negative regulation of cell adhesion);GO:0008138(protein ty…	04010(MAPK signaling pathway);04726(Serotonergic synapse);05418(Fluid shear stress and atherosclerosis)	K21278	3.1.3.48;EC:3.1.3.16
2	ENSG00000107738	VSIR	2.90815	1.74546	0.736492	6.77774e-151	2.94384e-146	V-set immunoregulatory receptor [Source:HGNC Symbol;Acc:HGNC:30085]	GO:0005886(plasma membrane);GO:0010628(positive regulation of gene expression);GO:0010950(positive regulation of endopeptidase activity);GO:0016020(membrane);GO:0016021(integral component of membrane);GO:0019899(enzyme binding);GO:0030335(positive regulation of cell migration);GO:0031638(zymogen activation);GO:0032689(negative regulation of interferon-gamma production);GO:0032693(negative regulat…	04514(Cell adhesion molecules (CAMs))	K23268	NA
2	ENSG00000170542	SERPINB9	2.04348	1.19038	0.779611	2.09596e-150	9.10361e-146	serpin family B member 9 [Source:HGNC Symbol;Acc:HGNC:8955]	GO:0002020(protease binding);GO:0002448(mast cell mediated immunity);GO:0004867(serine-type endopeptidase inhibitor activity);GO:0005515(protein binding);GO:0005615(extracellular space);GO:0005634(nucleus);GO:0005654(nucleoplasm);GO:0005737(cytoplasm);GO:0005794(Golgi apparatus);GO:0005829(cytosol);GO:0006915(apoptotic process);GO:0006955(immune response);GO:0009617(response to bacterium);GO:0010…	05146(Amoebiasis)	K13963	NA
2	ENSG00000059728	MXD1	3.44599	2.04599	0.752122	4.25867e-149	1.84971e-144	MAX dimerization protein 1 [Source:HGNC Symbol;Acc:HGNC:6761]	GO:0000122(negative regulation of transcription by RNA polymerase II);GO:0000790(nuclear chromatin);GO:0000978(RNA polymerase II proximal promoter sequence-specific DNA binding);GO:0000981(DNA-binding transcription factor activity, RNA polymerase II-specific);GO:0001227(DNA-binding transcription repressor activity, RNA polymerase II-specific);GO:0003677(DNA binding);GO:0003700(DNA-binding transcr…	NA	K09114	NA
2	ENSG00000100300	TSPO	9.28067	6.25755	0.568631	4.26356e-149	1.85184e-144	translocator protein [Source:HGNC Symbol;Acc:HGNC:1158]	GO:0005497(androgen binding);GO:0005515(protein binding);GO:0005739(mitochondrion);GO:0005741(mitochondrial outer membrane);GO:0005783(endoplasmic reticulum);GO:0006626(protein targeting to mitochondrion);GO:0006694(steroid biosynthetic process);GO:0006700(C21-steroid hormone biosynthetic process);GO:0006783(heme biosynthetic process);GO:0006811(ion transport);GO:0006820(anion transport);GO:00068…	04080(Neuroactive ligand-receptor interaction);04979(Cholesterol metabolism);05166(Human T-cell leukemia virus 1 infection)	NA	NA
2	ENSG00000112303	VNN2	0.645276	0.423829	0.606434	2.26271e-146	9.82784e-142	vanin 2 [Source:HGNC Symbol;Acc:HGNC:12706]	GO:0005576(extracellular region);GO:0005886(plasma membrane);GO:0006807(nitrogen compound metabolic process);GO:0015939(pantothenate metabolic process);GO:0016020(membrane);GO:0016787(hydrolase activity);GO:0016811(hydrolase activity, acting on carbon-nitrogen (but not peptide) bonds, in linear amides);GO:0017159(pantetheine hydrolase activity);GO:0031225(anchored component of membrane)	00770(Pantothenate and CoA biosynthesis)	K08069	EC:3.5.1.92
2	ENSG00000109475	RPL34	20.5316	14.8642	0.466005	1.82681e-145	7.93459e-141	ribosomal protein L34 [Source:HGNC Symbol;Acc:HGNC:10340]	GO:0000184(nuclear-transcribed mRNA catabolic process, nonsense-mediated decay);GO:0003723(RNA binding);GO:0003735(structural constituent of ribosome);GO:0005622(intracellular);GO:0005737(cytoplasm);GO:0005783(endoplasmic reticulum);GO:0005829(cytosol);GO:0005840(ribosome);GO:0006412(translation);GO:0006413(translational initiation);GO:0006614(SRP-dependent cotranslational protein targeting to me…	03010(Ribosome)	K02915	NA
2	ENSG00000177156	TALDO1	3.40254	2.26007	0.590245	3.79899e-142	1.65005e-137	transaldolase 1 [Source:HGNC Symbol;Acc:HGNC:11559]	GO:0003824(catalytic activity);GO:0004801(sedoheptulose-7-phosphate:D-glyceraldehyde-3-phosphate glyceronetransferase activity);GO:0005515(protein binding);GO:0005634(nucleus);GO:0005654(nucleoplasm);GO:0005737(cytoplasm);GO:0005829(cytosol);GO:0005975(carbohydrate metabolic process);GO:0005999(xylulose biosynthetic process);GO:0006002(fructose 6-phosphate metabolic process);GO:0006098(pentose-ph…	00030(Pentose phosphate pathway)	K00616	EC:2.2.1.2
2	ENSG00000274536	AL034397.3	0.746171	0.492146	0.600422	8.62393e-142	3.74572e-137	novel transcript, antisense VSIG4	NA	NA	NA	NA
2	ENSG00000221983	UBA52	20.1595	15.1359	0.413492	1.92915e-141	8.37906e-137	ubiquitin A-52 residue ribosomal protein fusion product 1 [Source:HGNC Symbol;Acc:HGNC:12458]	GO:0000122(negative regulation of transcription by RNA polymerase II);GO:0000184(nuclear-transcribed mRNA catabolic process, nonsense-mediated decay);GO:0000187(activation of MAPK activity);GO:0000209(protein polyubiquitination);GO:0000715(nucleotide-excision repair, DNA damage recognition);GO:0000717(nucleotide-excision repair, DNA duplex unwinding);GO:0002755(MyD88-dependent toll-like receptor …	03010(Ribosome)	K02927	NA
2	ENSG00000204397	CARD16	1.39674	0.869266	0.684189	1.72656e-140	7.49913e-136	caspase recruitment domain family member 16 [Source:HGNC Symbol;Acc:HGNC:33701]	GO:0004197(cysteine-type endopeptidase activity);GO:0004869(cysteine-type endopeptidase inhibitor activity);GO:0005515(protein binding);GO:0006508(proteolysis);GO:0010466(negative regulation of peptidase activity);GO:0010804(negative regulation of tumor necrosis factor-mediated signaling pathway);GO:0019900(kinase binding);GO:0030414(peptidase inhibitor activity);GO:0031665(negative regulation of…	04621(NOD-like receptor signaling pathway)	K12806	NA
2	ENSG00000124882	EREG	18.1418	10.7849	0.750311	2.62915e-136	1.14195e-131	epiregulin [Source:HGNC Symbol;Acc:HGNC:3443]	GO:0000165(MAPK cascade);GO:0001525(angiogenesis);GO:0001550(ovarian cumulus expansion);GO:0001556(oocyte maturation);GO:0001819(positive regulation of cytokine production);GO:0005154(epidermal growth factor receptor binding);GO:0005515(protein binding);GO:0005576(extracellular region);GO:0005615(extracellular space);GO:0005886(plasma membrane);GO:0005887(integral component of plasma membrane);GO…	04010(MAPK signaling pathway);04012(ErbB signaling pathway);04151(PI3K-Akt signaling pathway);05210(Colorectal cancer)	K09784	NA
2	ENSG00000184588	PDE4B	3.50922	2.10779	0.735415	3.23259e-136	1.40404e-131	phosphodiesterase 4B [Source:HGNC Symbol;Acc:HGNC:8781]	GO:0000930(gamma-tubulin complex);GO:0001780(neutrophil homeostasis);GO:0004114(3',5'-cyclic-nucleotide phosphodiesterase activity);GO:0004115(3',5'-cyclic-AMP phosphodiesterase activity);GO:0005515(protein binding);GO:0005813(centrosome);GO:0005829(cytosol);GO:0005891(voltage-gated calcium channel complex);GO:0006198(cAMP catabolic process);GO:0007165(signal transduction);GO:0007186(G protein-co…	00230(Purine metabolism);04024(cAMP signaling pathway);04928(Parathyroid hormone synthesis, secretion and action);05032(Morphine addiction)	NA	NA
2	ENSG00000051523	CYBA	17.1651	12.0739	0.507584	5.41323e-136	2.35118e-131	cytochrome b-245 alpha chain [Source:HGNC Symbol;Acc:HGNC:2577]	GO:0001666(response to hypoxia);GO:0001725(stress fiber);GO:0001938(positive regulation of endothelial cell proliferation);GO:0002479(antigen processing and presentation of exogenous peptide antigen via MHC class I, TAP-dependent);GO:0003106(negative regulation of glomerular filtration by angiotensin);GO:0005515(protein binding);GO:0005634(nucleus);GO:0005737(cytoplasm);GO:0005768(endosome);GO:00…	04145(Phagosome);04380(Osteoclast differentiation);04621(NOD-like receptor signaling pathway);04670(Leukocyte transendothelial migration);05140(Leishmaniasis);05418(Fluid shear stress and atherosclerosis)	NA	NA
2	ENSG00000185950	IRS2	3.78621	2.35266	0.686461	2.16165e-135	9.38891e-131	insulin receptor substrate 2 [Source:HGNC Symbol;Acc:HGNC:6126]	GO:0000165(MAPK cascade);GO:0002053(positive regulation of mesenchymal cell proliferation);GO:0002903(negative regulation of B cell apoptotic process);GO:0005158(insulin receptor binding);GO:0005515(protein binding);GO:0005737(cytoplasm);GO:0005829(cytosol);GO:0005886(plasma membrane);GO:0006006(glucose metabolic process);GO:0007165(signal transduction);GO:0007411(axon guidance);GO:0007420(brain …	04022(cGMP-PKG signaling pathway);04068(FoxO signaling pathway);04140(Autophagy - animal);04152(AMPK signaling pathway);04211(Longevity regulating pathway);04213(Longevity regulating pathway - multiple species);04910(Insulin signaling pathway);04920(Adipocytokine signaling pathway);04923(Regulation of lipolysis in adipocytes);04930(Type II diabetes mellitus);04931(Insulin resistance);04932(Non-al…	K07187	NA
2	ENSG00000018280	SLC11A1	6.83123	4.49479	0.603891	5.33467e-132	2.31706e-127	solute carrier family 11 member 1 [Source:HGNC Symbol;Acc:HGNC:10907]	GO:0001818(negative regulation of cytokine production);GO:0001819(positive regulation of cytokine production);GO:0002309(T cell proliferation involved in immune response);GO:0002369(T cell cytokine production);GO:0002606(positive regulation of dendritic cell antigen processing and presentation);GO:0002827(positive regulation of T-helper 1 type immune response);GO:0003674(molecular_function);GO:00…	04142(Lysosome)	K12347	NA
2	ENSG00000166523	CLEC4E	1.88851	1.14012	0.728058	1.39175e-129	6.04494e-125	C-type lectin domain family 4 member E [Source:HGNC Symbol;Acc:HGNC:14555]	GO:0002221(pattern recognition receptor signaling pathway);GO:0002223(stimulatory C-type lectin receptor signaling pathway);GO:0002292(T cell differentiation involved in immune response);GO:0002376(immune system process);GO:0005509(calcium ion binding);GO:0005886(plasma membrane);GO:0006955(immune response);GO:0016020(membrane);GO:0016021(integral component of membrane);GO:0030246(carbohydrate bi…	04625(C-type lectin receptor signaling pathway);05152(Tuberculosis)	K10059	NA
2	ENSG00000171049	FPR2	0.931026	0.597557	0.639746	5.50738e-129	2.39207e-124	formyl peptide receptor 2 [Source:HGNC Symbol;Acc:HGNC:3827]	GO:0001540(amyloid-beta binding);GO:0001774(microglial cell activation);GO:0001934(positive regulation of protein phosphorylation);GO:0002430(complement receptor mediated signaling pathway);GO:0004930(G protein-coupled receptor activity);GO:0004982(N-formyl peptide receptor activity);GO:0005124(scavenger receptor binding);GO:0005737(cytoplasm);GO:0005886(plasma membrane);GO:0006898(receptor-media…	04080(Neuroactive ligand-receptor interaction);05150(Staphylococcus aureus infection)	NA	NA
2	ENSG00000184009	ACTG1	19.9813	14.3649	0.476096	2.74922e-126	1.19409e-121	actin gamma 1 [Source:HGNC Symbol;Acc:HGNC:144]	GO:0000166(nucleotide binding);GO:0001895(retina homeostasis);GO:0005200(structural constituent of cytoskeleton);GO:0005515(protein binding);GO:0005522(profilin binding);GO:0005524(ATP binding);GO:0005615(extracellular space);GO:0005634(nucleus);GO:0005737(cytoplasm);GO:0005829(cytosol);GO:0005856(cytoskeleton);GO:0005884(actin filament);GO:0005886(plasma membrane);GO:0005925(focal adhesion);GO:0…	04015(Rap1 signaling pathway);04145(Phagosome);04210(Apoptosis);04390(Hippo signaling pathway);04510(Focal adhesion);04520(Adherens junction);04530(Tight junction);04611(Platelet activation);04670(Leukocyte transendothelial migration);04714(Thermogenesis);04810(Regulation of actin cytoskeleton);04919(Thyroid hormone signaling pathway);04921(Oxytocin signaling pathway);05100(Bacterial invasion of …	NA	NA
2	ENSG00000115271	GCA	1.71807	1.07979	0.67004	5.0392e-125	2.18873e-120	grancalcin [Source:HGNC Symbol;Acc:HGNC:15990]	GO:0005509(calcium ion binding);GO:0005515(protein binding);GO:0005576(extracellular region);GO:0005737(cytoplasm);GO:0005829(cytosol);GO:0005886(plasma membrane);GO:0016020(membrane);GO:0035578(azurophil granule lumen);GO:0042803(protein homodimerization activity);GO:0043312(neutrophil degranulation);GO:0046872(metal ion binding);GO:0046982(protein heterodimerization activity);GO:0061025(membran…	NA	NA	NA
2	ENSG00000204472	AIF1	16.2233	11.8499	0.453195	1.90601e-123	8.27858e-119	allograft inflammatory factor 1 [Source:HGNC Symbol;Acc:HGNC:352]	GO:0001726(ruffle);GO:0001774(microglial cell activation);GO:0001891(phagocytic cup);GO:0001934(positive regulation of protein phosphorylation);GO:0003674(molecular_function);GO:0003779(actin binding);GO:0005509(calcium ion binding);GO:0005634(nucleus);GO:0005737(cytoplasm);GO:0005829(cytosol);GO:0005856(cytoskeleton);GO:0005884(actin filament);GO:0005886(plasma membrane);GO:0006911(phagocytosis,…	NA	NA	NA
2	ENSG00000104904	OAZ1	20.654	16.0899	0.360266	1.83289e-122	7.96098e-118	ornithine decarboxylase antizyme 1 [Source:HGNC Symbol;Acc:HGNC:8095]	GO:0005515(protein binding);GO:0005634(nucleus);GO:0005737(cytoplasm);GO:0005829(cytosol);GO:0006521(regulation of cellular amino acid metabolic process);GO:0006595(polyamine metabolic process);GO:0006596(polyamine biosynthetic process);GO:0008073(ornithine decarboxylase inhibitor activity);GO:0043086(negative regulation of catalytic activity);GO:0045732(positive regulation of protein catabolic p…	NA	K16548	NA
2	ENSG00000197006	METTL9	1.67852	1.0826	0.632683	9.79568e-120	4.25466e-115	methyltransferase like 9 [Source:HGNC Symbol;Acc:HGNC:24586]	GO:0005515(protein binding)	NA	NA	NA
2	ENSG00000221869	CEBPD	10.5237	7.21606	0.544351	6.92404e-119	3.00739e-114	CCAAT enhancer binding protein delta [Source:HGNC Symbol;Acc:HGNC:1835]	GO:0000978(RNA polymerase II proximal promoter sequence-specific DNA binding);GO:0000981(DNA-binding transcription factor activity, RNA polymerase II-specific);GO:0001228(DNA-binding transcription activator activity, RNA polymerase II-specific);GO:0002244(hematopoietic progenitor cell differentiation);GO:0003677(DNA binding);GO:0003700(DNA-binding transcription factor activity);GO:0005515(protein…	NA	NA	NA
2	ENSG00000120742	SERP1	5.8437	4.16383	0.488971	1.12195e-118	4.87308e-114	stress associated endoplasmic reticulum protein 1 [Source:HGNC Symbol;Acc:HGNC:10759]	GO:0001501(skeletal system development);GO:0005515(protein binding);GO:0005783(endoplasmic reticulum);GO:0005789(endoplasmic reticulum membrane);GO:0005829(cytosol);GO:0005840(ribosome);GO:0005881(cytoplasmic microtubule);GO:0006006(glucose metabolic process);GO:0006464(cellular protein modification process);GO:0006486(protein glycosylation);GO:0007009(plasma membrane organization);GO:0009791(pos…	NA	NA	NA
2	ENSG00000188313	PLSCR1	2.25848	1.4608	0.62859	5.06759e-118	2.20106e-113	phospholipid scramblase 1 [Source:HGNC Symbol;Acc:HGNC:9092]	GO:0001228(DNA-binding transcription activator activity, RNA polymerase II-specific);GO:0003677(DNA binding);GO:0005154(epidermal growth factor receptor binding);GO:0005509(calcium ion binding);GO:0005515(protein binding);GO:0005634(nucleus);GO:0005730(nucleolus);GO:0005737(cytoplasm);GO:0005794(Golgi apparatus);GO:0005829(cytosol);GO:0005886(plasma membrane);GO:0005887(integral component of plas…	NA	NA	NA
2	ENSG00000198624	CCDC69	1.29059	0.835299	0.627666	1.72076e-117	7.47394e-113	coiled-coil domain containing 69 [Source:HGNC Symbol;Acc:HGNC:24487]	GO:0005634(nucleus);GO:0005737(cytoplasm);GO:0005819(spindle);GO:0005856(cytoskeleton);GO:0008017(microtubule binding);GO:0015630(microtubule cytoskeleton);GO:0030496(midbody);GO:0051233(spindle midzone);GO:0051255(spindle midzone assembly)	NA	NA	NA
2	ENSG00000162711	NLRP3	3.53061	2.15594	0.7116	2.24867e-117	9.76689e-113	NLR family pyrin domain containing 3 [Source:HGNC Symbol;Acc:HGNC:16400]	GO:0000139(Golgi membrane);GO:0000166(nucleotide binding);GO:0002374(cytokine secretion involved in immune response);GO:0002376(immune system process);GO:0002674(negative regulation of acute inflammatory response);GO:0002830(positive regulation of type 2 immune response);GO:0005515(protein binding);GO:0005524(ATP binding);GO:0005576(extracellular region);GO:0005634(nucleus);GO:0005737(cytoplasm);…	04217(Necroptosis);04621(NOD-like receptor signaling pathway);04625(C-type lectin receptor signaling pathway);05133(Pertussis);05164(Influenza A)	K12800	NA
2	ENSG00000186407	CD300E	4.41753	2.84922	0.632671	1.77179e-115	7.6956e-111	CD300e molecule [Source:HGNC Symbol;Acc:HGNC:28874]	GO:0002376(immune system process);GO:0005886(plasma membrane);GO:0016020(membrane);GO:0016021(integral component of membrane);GO:0045087(innate immune response);GO:0050776(regulation of immune response)	NA	K06719	NA
2	ENSG00000163162	RNF149	3.06081	2.01268	0.604794	2.03676e-114	8.84644e-110	ring finger protein 149 [Source:HGNC Symbol;Acc:HGNC:23137]	GO:0006511(ubiquitin-dependent protein catabolic process);GO:0016020(membrane);GO:0016021(integral component of membrane);GO:0016567(protein ubiquitination);GO:0016740(transferase activity);GO:0031647(regulation of protein stability);GO:0035690(cellular response to drug);GO:0043409(negative regulation of MAPK cascade);GO:0046872(metal ion binding);GO:0061630(ubiquitin protein ligase activity)	NA	K15704	EC:2.3.2.27
2	ENSG00000156482	RPL30	19.7702	14.6326	0.43414	8.84007e-113	3.8396e-108	ribosomal protein L30 [Source:HGNC Symbol;Acc:HGNC:10333]	GO:0000184(nuclear-transcribed mRNA catabolic process, nonsense-mediated decay);GO:0002181(cytoplasmic translation);GO:0003723(RNA binding);GO:0003735(structural constituent of ribosome);GO:0005515(protein binding);GO:0005622(intracellular);GO:0005634(nucleus);GO:0005829(cytosol);GO:0005840(ribosome);GO:0005925(focal adhesion);GO:0006412(translation);GO:0006413(translational initiation);GO:000661…	03010(Ribosome)	K02908	NA
2	ENSG00000132334	PTPRE	4.96702	3.38962	0.55126	2.83242e-112	1.23023e-107	protein tyrosine phosphatase, receptor type E [Source:HGNC Symbol;Acc:HGNC:9669]	GO:0004721(phosphoprotein phosphatase activity);GO:0004725(protein tyrosine phosphatase activity);GO:0005001(transmembrane receptor protein tyrosine phosphatase activity);GO:0005515(protein binding);GO:0005634(nucleus);GO:0005737(cytoplasm);GO:0005886(plasma membrane);GO:0006470(protein dephosphorylation);GO:0016020(membrane);GO:0016021(integral component of membrane);GO:0016311(dephosphorylation…	NA	K18033	EC:3.1.3.48
2	ENSG00000149806	FAU	17.9094	13.8333	0.372574	4.15095e-111	1.80292e-106	FAU, ubiquitin like and ribosomal protein S30 fusion [Source:HGNC Symbol;Acc:HGNC:3597]	GO:0000184(nuclear-transcribed mRNA catabolic process, nonsense-mediated decay);GO:0002227(innate immune response in mucosa);GO:0003723(RNA binding);GO:0003735(structural constituent of ribosome);GO:0005515(protein binding);GO:0005575(cellular_component);GO:0005615(extracellular space);GO:0005622(intracellular);GO:0005654(nucleoplasm);GO:0005829(cytosol);GO:0005840(ribosome);GO:0006412(translatio…	03010(Ribosome)	NA	NA
2	ENSG00000102879	CORO1A	2.86441	1.96418	0.544315	5.16758e-111	2.24449e-106	coronin 1A [Source:HGNC Symbol;Acc:HGNC:2252]	GO:0001772(immunological synapse);GO:0001845(phagolysosome assembly);GO:0001891(phagocytic cup);GO:0003723(RNA binding);GO:0003779(actin binding);GO:0003785(actin monomer binding);GO:0005515(protein binding);GO:0005737(cytoplasm);GO:0005769(early endosome);GO:0005829(cytosol);GO:0005856(cytoskeleton);GO:0005884(actin filament);GO:0005886(plasma membrane);GO:0005911(cell-cell junction);GO:0005938(…	04145(Phagosome);05152(Tuberculosis)	K13882	NA
2	ENSG00000110700	RPS13	15.207	11.1061	0.453387	4.82245e-109	2.09458e-104	ribosomal protein S13 [Source:HGNC Symbol;Acc:HGNC:10386]	GO:0000184(nuclear-transcribed mRNA catabolic process, nonsense-mediated decay);GO:0003723(RNA binding);GO:0003729(mRNA binding);GO:0003735(structural constituent of ribosome);GO:0005515(protein binding);GO:0005622(intracellular);GO:0005634(nucleus);GO:0005654(nucleoplasm);GO:0005730(nucleolus);GO:0005829(cytosol);GO:0005840(ribosome);GO:0005925(focal adhesion);GO:0006412(translation);GO:0006413(…	03010(Ribosome)	K02953	NA
2	ENSG00000142089	IFITM3	5.40505	3.39017	0.67295	1.67799e-108	7.28818e-104	interferon induced transmembrane protein 3 [Source:HGNC Symbol;Acc:HGNC:5414]	GO:0002376(immune system process);GO:0005515(protein binding);GO:0005764(lysosome);GO:0005765(lysosomal membrane);GO:0005768(endosome);GO:0005886(plasma membrane);GO:0006955(immune response);GO:0009615(response to virus);GO:0016020(membrane);GO:0016021(integral component of membrane);GO:0031902(late endosome membrane);GO:0032897(negative regulation of viral transcription);GO:0032991(protein-conta…	NA	K06566	NA
2	ENSG00000028137	TNFRSF1B	4.10892	2.76154	0.573286	8.60611e-108	3.73798e-103	TNF receptor superfamily member 1B [Source:HGNC Symbol;Acc:HGNC:11917]	GO:0002724(regulation of T cell cytokine production);GO:0002739(regulation of cytokine secretion involved in immune response);GO:0002947(tumor necrosis factor receptor superfamily complex);GO:0003176(aortic valve development);GO:0003177(pulmonary valve development);GO:0003332(negative regulation of extracellular matrix constituent secretion);GO:0005031(tumor necrosis factor-activated receptor act…	04060(Cytokine-cytokine receptor interaction);04668(TNF signaling pathway);04920(Adipocytokine signaling pathway);05014(Amyotrophic lateral sclerosis (ALS));05170(Human immunodeficiency virus 1 infection)	K05141	NA
2	ENSG00000118503	TNFAIP3	12.6515	8.3412	0.600985	4.80187e-107	2.08565e-102	TNF alpha induced protein 3 [Source:HGNC Symbol;Acc:HGNC:11896]	GO:0001922(B-1 B cell homeostasis);GO:0002020(protease binding);GO:0002237(response to molecule of bacterial origin);GO:0002634(regulation of germinal center formation);GO:0002677(negative regulation of chronic inflammatory response);GO:0003677(DNA binding);GO:0003824(catalytic activity);GO:0004842(ubiquitin-protein transferase activity);GO:0004843(thiol-dependent ubiquitin-specific protease acti…	04064(NF-kappa B signaling pathway);04217(Necroptosis);04621(NOD-like receptor signaling pathway);04657(IL-17 signaling pathway);04668(TNF signaling pathway);05162(Measles);05169(Epstein-Barr virus infection)	K11859	EC:3.4.19.12
2	ENSG00000121966	CXCR4	3.69767	2.27273	0.702188	7.08336e-107	3.07659e-102	C-X-C motif chemokine receptor 4 [Source:HGNC Symbol;Acc:HGNC:2561]	GO:0000187(activation of MAPK activity);GO:0001618(virus receptor activity);GO:0001666(response to hypoxia);GO:0001764(neuron migration);GO:0002064(epithelial cell development);GO:0002407(dendritic cell chemotaxis);GO:0003779(actin binding);GO:0004930(G protein-coupled receptor activity);GO:0004950(chemokine receptor activity);GO:0005515(protein binding);GO:0005634(nucleus);GO:0005737(cytoplasm);…	04020(Calcium signaling pathway);04060(Cytokine-cytokine receptor interaction);04062(Chemokine signaling pathway);04144(Endocytosis);04360(Axon guidance);04670(Leukocyte transendothelial migration);04672(Intestinal immune network for IgA production);04810(Regulation of actin cytoskeleton);05163(Human cytomegalovirus infection);05170(Human immunodeficiency virus 1 infection);05200(Pathways in canc…	K04189	NA
2	ENSG00000130592	LSP1	2.30933	1.48813	0.633972	1.73319e-105	7.52792e-101	lymphocyte specific protein 1 [Source:HGNC Symbol;Acc:HGNC:6707]	GO:0003779(actin binding);GO:0005886(plasma membrane);GO:0006968(cellular defense response);GO:0007165(signal transduction);GO:0015629(actin cytoskeleton);GO:0016020(membrane);GO:0070062(extracellular exosome)	04625(C-type lectin receptor signaling pathway);05152(Tuberculosis)	NA	NA
2	ENSG00000182957	SPATA13	1.16071	0.738869	0.651615	4.32434e-103	1.87823e-98	spermatogenesis associated 13 [Source:HGNC Symbol;Acc:HGNC:23222]	GO:0005085(guanyl-nucleotide exchange factor activity);GO:0005089(Rho guanyl-nucleotide exchange factor activity);GO:0005515(protein binding);GO:0005654(nucleoplasm);GO:0005737(cytoplasm);GO:0005829(cytosol);GO:0005886(plasma membrane);GO:0016020(membrane);GO:0016477(cell migration);GO:0030027(lamellipodium);GO:0030032(lamellipodium assembly);GO:0030175(filopodium);GO:0030334(regulation of cell m…	04810(Regulation of actin cytoskeleton)	K05769	NA
2	ENSG00000125772	GPCPD1	2.58129	1.6697	0.628501	4.65777e-103	2.02306e-98	glycerophosphocholine phosphodiesterase 1 [Source:HGNC Symbol;Acc:HGNC:26957]	GO:0005737(cytoplasm);GO:0005829(cytosol);GO:0006629(lipid metabolic process);GO:0007519(skeletal muscle tissue development);GO:0008081(phosphoric diester hydrolase activity);GO:0016787(hydrolase activity);GO:0030246(carbohydrate binding);GO:0046475(glycerophospholipid catabolic process);GO:0047389(glycerophosphocholine phosphodiesterase activity);GO:2001070(starch binding)	00564(Glycerophospholipid metabolism);05231(Choline metabolism in cancer)	K18695	EC:3.1.4.2
2	ENSG00000069849	ATP1B3	7.90171	5.35034	0.562534	1.03881e-101	4.51195e-97	ATPase Na+/K+ transporting subunit beta 3 [Source:HGNC Symbol;Acc:HGNC:806]	GO:0001671(ATPase activator activity);GO:0005391(sodium:potassium-exchanging ATPase activity);GO:0005737(cytoplasm);GO:0005886(plasma membrane);GO:0005890(sodium:potassium-exchanging ATPase complex);GO:0005901(caveola);GO:0006811(ion transport);GO:0006813(potassium ion transport);GO:0006814(sodium ion transport);GO:0006883(cellular sodium ion homeostasis);GO:0010248(establishment or maintenance o…	04022(cGMP-PKG signaling pathway);04024(cAMP signaling pathway);04260(Cardiac muscle contraction);04261(Adrenergic signaling in cardiomyocytes);04911(Insulin secretion);04918(Thyroid hormone synthesis);04919(Thyroid hormone signaling pathway);04925(Aldosterone synthesis and secretion);04960(Aldosterone-regulated sodium reabsorption);04961(Endocrine and other factor-regulated calcium reabsorption)…	NA	NA
2	ENSG00000139112	GABARAPL1	2.42476	1.58638	0.612104	9.02744e-101	3.92098e-96	GABA type A receptor associated protein like 1 [Source:HGNC Symbol;Acc:HGNC:4068]	GO:0000045(autophagosome assembly);GO:0000421(autophagosome membrane);GO:0000422(autophagy of mitochondrion);GO:0005515(protein binding);GO:0005622(intracellular);GO:0005737(cytoplasm);GO:0005739(mitochondrion);GO:0005776(autophagosome);GO:0005783(endoplasmic reticulum);GO:0005794(Golgi apparatus);GO:0005829(cytosol);GO:0005856(cytoskeleton);GO:0005874(microtubule);GO:0006914(autophagy);GO:000699…	04068(FoxO signaling pathway);04136(Autophagy - other);04137(Mitophagy - animal);04140(Autophagy - animal);04371(Apelin signaling pathway);04621(NOD-like receptor signaling pathway);04727(GABAergic synapse);05167(Kaposi sarcoma-associated herpesvirus infection)	K08341	NA
2	ENSG00000138061	CYP1B1	4.48702	2.62769	0.771962	2.37983e-100	1.03366e-95	cytochrome P450 family 1 subfamily B member 1 [Source:HGNC Symbol;Acc:HGNC:2597]	GO:0001525(angiogenesis);GO:0002930(trabecular meshwork development);GO:0004497(monooxygenase activity);GO:0005506(iron ion binding);GO:0005739(mitochondrion);GO:0005783(endoplasmic reticulum);GO:0005789(endoplasmic reticulum membrane);GO:0006725(cellular aromatic compound metabolic process);GO:0006805(xenobiotic metabolic process);GO:0006809(nitric oxide biosynthetic process);GO:0007155(cell adh…	00140(Steroid hormone biosynthesis);00380(Tryptophan metabolism);00980(Metabolism of xenobiotics by cytochrome P450);04913(Ovarian steroidogenesis);05204(Chemical carcinogenesis);05206(MicroRNAs in cancer)	K07410	EC:1.14.14.1
2	ENSG00000101608	MYL12A	5.21801	3.78181	0.464421	7.41043e-99	3.21865e-94	myosin light chain 12A [Source:HGNC Symbol;Acc:HGNC:16701]	GO:0005509(calcium ion binding);GO:0005515(protein binding);GO:0005829(cytosol);GO:0006936(muscle contraction);GO:0016459(myosin complex);GO:0046872(metal ion binding);GO:0070062(extracellular exosome);GO:0070527(platelet aggregation)	04360(Axon guidance);04510(Focal adhesion);04530(Tight junction);04611(Platelet activation);04670(Leukocyte transendothelial migration);04810(Regulation of actin cytoskeleton)	K12757	NA
2	ENSG00000167460	TPM4	6.6059	4.78414	0.465493	1.08757e-98	4.72376e-94	tropomyosin 4 [Source:HGNC Symbol;Acc:HGNC:12013]	GO:0001649(osteoblast differentiation);GO:0001725(stress fiber);GO:0002102(podosome);GO:0003779(actin binding);GO:0005509(calcium ion binding);GO:0005515(protein binding);GO:0005737(cytoplasm);GO:0005829(cytosol);GO:0005856(cytoskeleton);GO:0005862(muscle thin filament tropomyosin);GO:0005884(actin filament);GO:0005925(focal adhesion);GO:0006936(muscle contraction);GO:0007015(actin filament organ…	04260(Cardiac muscle contraction);04261(Adrenergic signaling in cardiomyocytes);05410(Hypertrophic cardiomyopathy (HCM));05414(Dilated cardiomyopathy (DCM))	K10375	NA
2	ENSG00000125810	CD93	5.07662	3.43328	0.564283	6.13731e-95	2.66568e-90	CD93 molecule [Source:HGNC Symbol;Acc:HGNC:15855]	GO:0001849(complement component C1q binding);GO:0005509(calcium ion binding);GO:0005515(protein binding);GO:0005886(plasma membrane);GO:0006909(phagocytosis);GO:0007155(cell adhesion);GO:0009986(cell surface);GO:0016020(membrane);GO:0016021(integral component of membrane);GO:0016032(viral process);GO:0030246(carbohydrate binding);GO:0030667(secretory granule membrane);GO:0031410(cytoplasmic vesic…	NA	K06702	NA
2	ENSG00000158869	FCER1G	17.0901	13.0384	0.390394	7.90347e-95	3.43279e-90	Fc fragment of IgE receptor Ig [Source:HGNC Symbol;Acc:HGNC:3611]	GO:0001798(positive regulation of type IIa hypersensitivity);GO:0001805(positive regulation of type III hypersensitivity);GO:0001812(positive regulation of type I hypersensitivity);GO:0002223(stimulatory C-type lectin receptor signaling pathway);GO:0002283(neutrophil activation involved in immune response);GO:0002292(T cell differentiation involved in immune response);GO:0002376(immune system pro…	04071(Sphingolipid signaling pathway);04072(Phospholipase D signaling pathway);04611(Platelet activation);04625(C-type lectin receptor signaling pathway);04650(Natural killer cell mediated cytotoxicity);04664(Fc epsilon RI signaling pathway);05152(Tuberculosis);05310(Asthma)	K07983	NA
2	ENSG00000107968	MAP3K8	5.59466	3.92189	0.512501	7.27859e-93	3.16138e-88	mitogen-activated protein kinase kinase kinase 8 [Source:HGNC Symbol;Acc:HGNC:6860]	GO:0000166(nucleotide binding);GO:0000186(activation of MAPKK activity);GO:0000287(magnesium ion binding);GO:0002376(immune system process);GO:0004672(protein kinase activity);GO:0004674(protein serine/threonine kinase activity);GO:0004709(MAP kinase kinase kinase activity);GO:0005515(protein binding);GO:0005524(ATP binding);GO:0005737(cytoplasm);GO:0005829(cytosol);GO:0006468(protein phosphoryla…	04010(MAPK signaling pathway);04620(Toll-like receptor signaling pathway);04660(T cell receptor signaling pathway);04668(TNF signaling pathway)	NA	NA
2	ENSG00000169230	PRELID1	3.13217	2.21425	0.500342	1.34132e-92	5.82588e-88	PRELI domain containing 1 [Source:HGNC Symbol;Acc:HGNC:30255]	GO:0005515(protein binding);GO:0005654(nucleoplasm);GO:0005739(mitochondrion);GO:0005758(mitochondrial intermembrane space);GO:0006869(lipid transport);GO:0006915(apoptotic process);GO:0006955(immune response);GO:0007275(multicellular organism development);GO:0010917(negative regulation of mitochondrial membrane potential);GO:0010950(positive regulation of endopeptidase activity);GO:0015914(phosp…	NA	NA	NA
2	ENSG00000145592	RPL37	19.567	15.3296	0.352095	1.82206e-92	7.91394e-88	ribosomal protein L37 [Source:HGNC Symbol;Acc:HGNC:10347]	GO:0000184(nuclear-transcribed mRNA catabolic process, nonsense-mediated decay);GO:0003723(RNA binding);GO:0003735(structural constituent of ribosome);GO:0005622(intracellular);GO:0005829(cytosol);GO:0005840(ribosome);GO:0006412(translation);GO:0006413(translational initiation);GO:0006614(SRP-dependent cotranslational protein targeting to membrane);GO:0019083(viral transcription);GO:0019843(rRNA …	03010(Ribosome)	K02922	NA
2	ENSG00000153922	CHD1	2.9203	1.99715	0.548177	4.66763e-92	2.02734e-87	chromodomain helicase DNA binding protein 1 [Source:HGNC Symbol;Acc:HGNC:1915]	GO:0000166(nucleotide binding);GO:0001650(fibrillar center);GO:0003677(DNA binding);GO:0004003(ATP-dependent DNA helicase activity);GO:0004386(helicase activity);GO:0005515(protein binding);GO:0005524(ATP binding);GO:0005634(nucleus);GO:0005654(nucleoplasm);GO:0005737(cytoplasm);GO:0006325(chromatin organization);GO:0006338(chromatin remodeling);GO:0006357(regulation of transcription by RNA polym…	NA	NA	NA
2	ENSG00000161970	RPL26	8.63171	6.31607	0.450619	9.88094e-92	4.29169e-87	ribosomal protein L26 [Source:HGNC Symbol;Acc:HGNC:10327]	GO:0000184(nuclear-transcribed mRNA catabolic process, nonsense-mediated decay);GO:0002181(cytoplasmic translation);GO:0003723(RNA binding);GO:0003735(structural constituent of ribosome);GO:0005515(protein binding);GO:0005622(intracellular);GO:0005654(nucleoplasm);GO:0005730(nucleolus);GO:0005737(cytoplasm);GO:0005829(cytosol);GO:0005840(ribosome);GO:0006364(rRNA processing);GO:0006412(translatio…	03010(Ribosome)	K02898	NA
2	ENSG00000138326	RPS24	21.2524	16.5718	0.358895	1.01073e-91	4.39001e-87	ribosomal protein S24 [Source:HGNC Symbol;Acc:HGNC:10411]	GO:0000184(nuclear-transcribed mRNA catabolic process, nonsense-mediated decay);GO:0003723(RNA binding);GO:0003735(structural constituent of ribosome);GO:0005622(intracellular);GO:0005634(nucleus);GO:0005654(nucleoplasm);GO:0005829(cytosol);GO:0005840(ribosome);GO:0006364(rRNA processing);GO:0006412(translation);GO:0006413(translational initiation);GO:0006614(SRP-dependent cotranslational protein…	03010(Ribosome)	K02974	NA
2	ENSG00000075624	ACTB	106.891	84.6683	0.336245	3.82553e-90	1.66158e-85	actin beta [Source:HGNC Symbol;Acc:HGNC:132]	GO:0000079(regulation of cyclin-dependent protein serine/threonine kinase activity);GO:0000166(nucleotide binding);GO:0000790(nuclear chromatin);GO:0000978(RNA polymerase II proximal promoter sequence-specific DNA binding);GO:0000980(RNA polymerase II distal enhancer sequence-specific DNA binding);GO:0001895(retina homeostasis);GO:0005200(structural constituent of cytoskeleton);GO:0005515(protein…	04015(Rap1 signaling pathway);04145(Phagosome);04210(Apoptosis);04390(Hippo signaling pathway);04510(Focal adhesion);04520(Adherens junction);04530(Tight junction);04611(Platelet activation);04670(Leukocyte transendothelial migration);04714(Thermogenesis);04810(Regulation of actin cytoskeleton);04919(Thyroid hormone signaling pathway);04921(Oxytocin signaling pathway);04971(Gastric acid secretion…	NA	NA
2	ENSG00000143384	MCL1	8.01962	5.91917	0.43814	7.44653e-90	3.23433e-85	MCL1, BCL2 family apoptosis regulator [Source:HGNC Symbol;Acc:HGNC:6943]	GO:0001709(cell fate determination);GO:0005515(protein binding);GO:0005634(nucleus);GO:0005654(nucleoplasm);GO:0005737(cytoplasm);GO:0005739(mitochondrion);GO:0005741(mitochondrial outer membrane);GO:0005829(cytosol);GO:0006915(apoptotic process);GO:0007275(multicellular organism development);GO:0008320(protein transmembrane transporter activity);GO:0008630(intrinsic apoptotic signaling pathway i…	04151(PI3K-Akt signaling pathway);04210(Apoptosis);04630(Jak-STAT signaling pathway);05206(MicroRNAs in cancer)	K02539	NA
2	ENSG00000182899	RPL35A	13.5541	10.4372	0.377006	5.92805e-89	2.57479e-84	ribosomal protein L35a [Source:HGNC Symbol;Acc:HGNC:10345]	GO:0000049(tRNA binding);GO:0000184(nuclear-transcribed mRNA catabolic process, nonsense-mediated decay);GO:0002181(cytoplasmic translation);GO:0003723(RNA binding);GO:0003735(structural constituent of ribosome);GO:0005515(protein binding);GO:0005622(intracellular);GO:0005829(cytosol);GO:0005840(ribosome);GO:0006364(rRNA processing);GO:0006412(translation);GO:0006413(translational initiation);GO:…	03010(Ribosome)	K02917	NA
2	ENSG00000183696	UPP1	3.97383	2.82001	0.49483	2.34534e-88	1.01867e-83	uridine phosphorylase 1 [Source:HGNC Symbol;Acc:HGNC:12576]	GO:0003824(catalytic activity);GO:0004850(uridine phosphorylase activity);GO:0005634(nucleus);GO:0005654(nucleoplasm);GO:0005737(cytoplasm);GO:0005829(cytosol);GO:0006139(nucleobase-containing compound metabolic process);GO:0006218(uridine catabolic process);GO:0006220(pyrimidine nucleotide metabolic process);GO:0009116(nucleoside metabolic process);GO:0009166(nucleotide catabolic process);GO:001…	00240(Pyrimidine metabolism);00983(Drug metabolism - other enzymes)	K00757	EC:2.4.2.3
2	ENSG00000124731	TREM1	2.38636	1.61308	0.564999	1.27703e-87	5.54663e-83	triggering receptor expressed on myeloid cells 1 [Source:HGNC Symbol;Acc:HGNC:17760]	GO:0002526(acute inflammatory response);GO:0005576(extracellular region);GO:0005886(plasma membrane);GO:0006959(humoral immune response);GO:0016020(membrane);GO:0016021(integral component of membrane);GO:0035556(intracellular signal transduction);GO:0038023(signaling receptor activity);GO:0045087(innate immune response);GO:0050776(regulation of immune response);GO:0050900(leukocyte migration);GO:…	NA	K14362	NA
2	ENSG00000169442	CD52	4.91962	3.01127	0.708174	3.36367e-87	1.46098e-82	CD52 molecule [Source:HGNC Symbol;Acc:HGNC:1804]	GO:0005576(extracellular region);GO:0005886(plasma membrane);GO:0007204(positive regulation of cytosolic calcium ion concentration);GO:0016020(membrane);GO:0016021(integral component of membrane);GO:0031225(anchored component of membrane);GO:0031226(intrinsic component of plasma membrane);GO:0045730(respiratory burst);GO:0097225(sperm midpiece)	NA	NA	NA
2	ENSG00000197629	MPEG1	3.18581	2.20975	0.527778	6.63229e-87	2.88067e-82	macrophage expressed 1 [Source:HGNC Symbol;Acc:HGNC:29619]	GO:0016020(membrane);GO:0016021(integral component of membrane);GO:0042742(defense response to bacterium)	NA	NA	NA
2	ENSG00000213903	LTB4R	0.785883	0.556171	0.498786	2.28563e-86	9.92741e-82	leukotriene B4 receptor [Source:HGNC Symbol;Acc:HGNC:6713]	GO:0000166(nucleotide binding);GO:0001632(leukotriene B4 receptor activity);GO:0004930(G protein-coupled receptor activity);GO:0004966(galanin receptor activity);GO:0004974(leukotriene receptor activity);GO:0005886(plasma membrane);GO:0005887(integral component of plasma membrane);GO:0006936(muscle contraction);GO:0006954(inflammatory response);GO:0006955(immune response);GO:0007165(signal transd…	04080(Neuroactive ligand-receptor interaction)	K04296	NA
2	ENSG00000136026	CKAP4	1.94689	1.32061	0.559968	7.38822e-86	3.209e-81	cytoskeleton associated protein 4 [Source:NCBI gene;Acc:10970]	GO:0003723(RNA binding);GO:0005737(cytoplasm);GO:0005783(endoplasmic reticulum);GO:0005788(endoplasmic reticulum lumen);GO:0005789(endoplasmic reticulum membrane);GO:0005791(rough endoplasmic reticulum);GO:0005811(lipid droplet);GO:0005829(cytosol);GO:0005856(cytoskeleton);GO:0005886(plasma membrane);GO:0016020(membrane);GO:0016021(integral component of membrane);GO:0016607(nuclear speck);GO:0035…	04141(Protein processing in endoplasmic reticulum)	NA	NA
2	ENSG00000139132	FGD4	2.8979	1.97686	0.5518	6.41213e-85	2.78505e-80	FYVE, RhoGEF and PH domain containing 4 [Source:HGNC Symbol;Acc:HGNC:19125]	GO:0001726(ruffle);GO:0003779(actin binding);GO:0005085(guanyl-nucleotide exchange factor activity);GO:0005089(Rho guanyl-nucleotide exchange factor activity);GO:0005737(cytoplasm);GO:0005794(Golgi apparatus);GO:0005829(cytosol);GO:0005856(cytoskeleton);GO:0007010(cytoskeleton organization);GO:0007186(G protein-coupled receptor signaling pathway);GO:0008360(regulation of cell shape);GO:0030027(la…	NA	K05723	NA
2	ENSG00000196531	NACA	11.3318	8.72917	0.376459	1.9495e-83	8.46747e-79	nascent polypeptide associated complex subunit alpha [Source:HGNC Symbol;Acc:HGNC:7629]	GO:0003231(cardiac ventricle development);GO:0003677(DNA binding);GO:0003713(transcription coactivator activity);GO:0005515(protein binding);GO:0005634(nucleus);GO:0005737(cytoplasm);GO:0005854(nascent polypeptide-associated complex);GO:0006412(translation);GO:0010664(negative regulation of striated muscle cell apoptotic process);GO:0015031(protein transport);GO:0043403(skeletal muscle tissue reg…	04928(Parathyroid hormone synthesis, secretion and action)	K03626	NA
2	ENSG00000171223	JUNB	9.07764	6.6606	0.446664	4.302e-83	1.86853e-78	JunB proto-oncogene, AP-1 transcription factor subunit [Source:HGNC Symbol;Acc:HGNC:6205]	GO:0000122(negative regulation of transcription by RNA polymerase II);GO:0000785(chromatin);GO:0000790(nuclear chromatin);GO:0000977(RNA polymerase II regulatory region sequence-specific DNA binding);GO:0000978(RNA polymerase II proximal promoter sequence-specific DNA binding);GO:0000981(DNA-binding transcription factor activity, RNA polymerase II-specific);GO:0001228(DNA-binding transcription ac…	04380(Osteoclast differentiation);04668(TNF signaling pathway)	K09028	NA
2	ENSG00000157168	NRG1	0.589552	0.427624	0.463275	9.88623e-83	4.29399e-78	neuregulin 1 [Source:HGNC Symbol;Acc:HGNC:7997]	GO:0000165(MAPK cascade);GO:0000187(activation of MAPK activity);GO:0000902(cell morphogenesis);GO:0003161(cardiac conduction system development);GO:0003222(ventricular trabecula myocardium morphogenesis);GO:0003712(transcription coregulator activity);GO:0005102(signaling receptor binding);GO:0005125(cytokine activity);GO:0005176(ErbB-2 class receptor binding);GO:0005178(integrin binding);GO:0005…	01521(EGFR tyrosine kinase inhibitor resistance);04012(ErbB signaling pathway)	NA	NA
2	ENSG00000164104	HMGB2	3.02691	2.08607	0.537056	2.98653e-82	1.29717e-77	high mobility group box 2 [Source:HGNC Symbol;Acc:HGNC:5000]	GO:0000400(four-way junction DNA binding);GO:0000790(nuclear chromatin);GO:0000793(condensed chromosome);GO:0001158(enhancer sequence-specific DNA binding);GO:0001938(positive regulation of endothelial cell proliferation);GO:0002376(immune system process);GO:0002437(inflammatory response to antigenic stimulus);GO:0003677(DNA binding);GO:0003684(damaged DNA binding);GO:0003690(double-stranded DNA …	NA	K11295	NA
2	ENSG00000224397	SMIM25	2.44905	1.65934	0.56161	2.17269e-81	9.43688e-77	small integral membrane protein 25 [Source:HGNC Symbol;Acc:HGNC:50328]	NA	NA	NA	NA
2	ENSG00000142347	MYO1F	2.32076	1.64523	0.496312	1.70161e-80	7.39075e-76	myosin IF [Source:HGNC Symbol;Acc:HGNC:7600]	GO:0000166(nucleotide binding);GO:0003774(motor activity);GO:0003779(actin binding);GO:0005515(protein binding);GO:0005516(calmodulin binding);GO:0005524(ATP binding);GO:0008150(biological_process);GO:0016459(myosin complex);GO:0016461(unconventional myosin complex)	NA	K10356	NA
2	ENSG00000117298	ECE1	0.626898	0.461391	0.442241	6.61589e-80	2.87354e-75	endothelin converting enzyme 1 [Source:HGNC Symbol;Acc:HGNC:3146]	GO:0001921(positive regulation of receptor recycling);GO:0003100(regulation of systemic arterial blood pressure by endothelin);GO:0004175(endopeptidase activity);GO:0004222(metalloendopeptidase activity);GO:0005515(protein binding);GO:0005765(lysosomal membrane);GO:0005768(endosome);GO:0005886(plasma membrane);GO:0006508(proteolysis);GO:0007507(heart development);GO:0008233(peptidase activity);GO…	NA	K01415	EC:3.4.24.71
2	ENSG00000142676	RPL11	20.5942	16.2161	0.344812	8.87097e-80	3.85302e-75	ribosomal protein L11 [Source:HGNC Symbol;Acc:HGNC:10301]	GO:0000027(ribosomal large subunit assembly);GO:0000184(nuclear-transcribed mRNA catabolic process, nonsense-mediated decay);GO:0002181(cytoplasmic translation);GO:0003723(RNA binding);GO:0003735(structural constituent of ribosome);GO:0005515(protein binding);GO:0005622(intracellular);GO:0005634(nucleus);GO:0005654(nucleoplasm);GO:0005730(nucleolus);GO:0005737(cytoplasm);GO:0005829(cytosol);GO:00…	03010(Ribosome)	K02868	NA
2	ENSG00000104894	CD37	2.6488	1.86971	0.502524	2.55942e-79	1.11166e-74	CD37 molecule [Source:HGNC Symbol;Acc:HGNC:1666]	GO:0001772(immunological synapse);GO:0005515(protein binding);GO:0005887(integral component of plasma membrane);GO:0007166(cell surface receptor signaling pathway);GO:0016020(membrane);GO:0016021(integral component of membrane);GO:0070062(extracellular exosome)	04640(Hematopoietic cell lineage)	NA	NA
2	ENSG00000165030	NFIL3	2.15168	1.49078	0.529392	5.17389e-79	2.24723e-74	nuclear factor, interleukin 3 regulated [Source:HGNC Symbol;Acc:HGNC:7787]	GO:0000122(negative regulation of transcription by RNA polymerase II);GO:0000977(RNA polymerase II regulatory region sequence-specific DNA binding);GO:0000978(RNA polymerase II proximal promoter sequence-specific DNA binding);GO:0000981(DNA-binding transcription factor activity, RNA polymerase II-specific);GO:0001227(DNA-binding transcription repressor activity, RNA polymerase II-specific);GO:000…	NA	K09059	NA
2	ENSG00000161944	ASGR2	0.385182	0.297256	0.373838	5.59497e-79	2.43012e-74	asialoglycoprotein receptor 2 [Source:HGNC Symbol;Acc:HGNC:743]	GO:0004873(asialoglycoprotein receptor activity);GO:0005515(protein binding);GO:0005886(plasma membrane);GO:0006897(endocytosis);GO:0006898(receptor-mediated endocytosis);GO:0007166(cell surface receptor signaling pathway);GO:0009100(glycoprotein metabolic process);GO:0016020(membrane);GO:0016021(integral component of membrane);GO:0016032(viral process);GO:0018279(protein N-linked glycosylation v…	04918(Thyroid hormone synthesis)	NA	NA
2	ENSG00000138678	GPAT3	0.610086	0.440575	0.469623	1.29993e-77	5.64612e-73	glycerol-3-phosphate acyltransferase 3 [Source:HGNC Symbol;Acc:HGNC:28157]	GO:0003841(1-acylglycerol-3-phosphate O-acyltransferase activity);GO:0004366(glycerol-3-phosphate O-acyltransferase activity);GO:0005783(endoplasmic reticulum);GO:0005789(endoplasmic reticulum membrane);GO:0006629(lipid metabolic process);GO:0006654(phosphatidic acid biosynthetic process);GO:0008654(phospholipid biosynthetic process);GO:0016020(membrane);GO:0016021(integral component of membrane)…	00561(Glycerolipid metabolism);00564(Glycerophospholipid metabolism)	K13506	EC:2.3.1.15
2	ENSG00000197405	C5AR1	9.95869	7.50315	0.40846	2.99519e-77	1.30093e-72	complement C5a receptor 1 [Source:HGNC Symbol;Acc:HGNC:1338]	GO:0000187(activation of MAPK activity);GO:0001856(complement component C5a binding);GO:0002430(complement receptor mediated signaling pathway);GO:0004875(complement receptor activity);GO:0004878(complement component C5a receptor activity);GO:0004930(G protein-coupled receptor activity);GO:0005886(plasma membrane);GO:0005887(integral component of plasma membrane);GO:0006915(apoptotic process);GO:…	04080(Neuroactive ligand-receptor interaction);04610(Complement and coagulation cascades);05150(Staphylococcus aureus infection)	NA	NA
2	ENSG00000213654	GPSM3	2.6812	1.97476	0.441198	2.82012e-76	1.22489e-71	G protein signaling modulator 3 [Source:HGNC Symbol;Acc:HGNC:13945]	GO:0002690(positive regulation of leukocyte chemotaxis);GO:0003674(molecular_function);GO:0005515(protein binding);GO:0005575(cellular_component);GO:0005737(cytoplasm);GO:0005886(plasma membrane);GO:0006955(immune response);GO:0008150(biological_process);GO:0030695(GTPase regulator activity);GO:0050729(positive regulation of inflammatory response);GO:0050790(regulation of catalytic activity);GO:1…	NA	K15838	NA
2	ENSG00000162702	ZNF281	1.5283	1.03798	0.558141	3.21861e-76	1.39797e-71	zinc finger protein 281 [Source:HGNC Symbol;Acc:HGNC:13075]	GO:0000122(negative regulation of transcription by RNA polymerase II);GO:0000978(RNA polymerase II proximal promoter sequence-specific DNA binding);GO:0000980(RNA polymerase II distal enhancer sequence-specific DNA binding);GO:0000981(DNA-binding transcription factor activity, RNA polymerase II-specific);GO:0001227(DNA-binding transcription repressor activity, RNA polymerase II-specific);GO:00036…	NA	NA	NA
2	ENSG00000119801	YPEL5	2.37925	1.68697	0.496071	1.6254e-75	7.05975e-71	yippee like 5 [Source:HGNC Symbol;Acc:HGNC:18329]	GO:0000151(ubiquitin ligase complex);GO:0000922(spindle pole);GO:0005515(protein binding);GO:0005576(extracellular region);GO:0005634(nucleus);GO:0005737(cytoplasm);GO:0005813(centrosome);GO:0005815(microtubule organizing center);GO:0005856(cytoskeleton);GO:0008283(cell population proliferation);GO:0030496(midbody);GO:0043312(neutrophil degranulation);GO:0046872(metal ion binding);GO:0097431(mito…	NA	NA	NA
2	ENSG00000188906	LRRK2	0.970372	0.68118	0.510502	3.12927e-75	1.35917e-70	leucine rich repeat kinase 2 [Source:HGNC Symbol;Acc:HGNC:18618]	GO:0000149(SNARE binding);GO:0000165(MAPK cascade);GO:0000166(nucleotide binding);GO:0000186(activation of MAPKK activity);GO:0000187(activation of MAPK activity);GO:0000287(magnesium ion binding);GO:0001933(negative regulation of protein phosphorylation);GO:0001934(positive regulation of protein phosphorylation);GO:0003779(actin binding);GO:0003924(GTPase activity);GO:0004672(protein kinase acti…	05012(Parkinson disease)	K08844	EC:2.7.11.1
2	ENSG00000239998	LILRA2	0.718819	0.522707	0.459626	1.01496e-73	4.40839e-69	leukocyte immunoglobulin like receptor A2 [Source:HGNC Symbol;Acc:HGNC:6603]	GO:0001791(IgM binding);GO:0002220(innate immune response activating cell surface receptor signaling pathway);GO:0002283(neutrophil activation involved in immune response);GO:0002376(immune system process);GO:0003823(antigen binding);GO:0005576(extracellular region);GO:0005886(plasma membrane);GO:0005887(integral component of plasma membrane);GO:0006952(defense response);GO:0007165(signal transdu…	04380(Osteoclast differentiation)	K06512	NA
2	ENSG00000166527	CLEC4D	0.400564	0.309778	0.370797	2.07715e-73	9.02188e-69	C-type lectin domain family 4 member D [Source:HGNC Symbol;Acc:HGNC:14554]	GO:0002223(stimulatory C-type lectin receptor signaling pathway);GO:0002250(adaptive immune response);GO:0002292(T cell differentiation involved in immune response);GO:0002376(immune system process);GO:0005515(protein binding);GO:0005886(plasma membrane);GO:0016020(membrane);GO:0016021(integral component of membrane);GO:0030246(carbohydrate binding);GO:0030887(positive regulation of myeloid dendr…	04625(C-type lectin receptor signaling pathway)	K10058	NA
2	ENSG00000131143	COX4I1	7.35199	5.71184	0.364178	2.21296e-73	9.61179e-69	cytochrome c oxidase subunit 4I1 [Source:HGNC Symbol;Acc:HGNC:2265]	GO:0004129(cytochrome-c oxidase activity);GO:0005515(protein binding);GO:0005634(nucleus);GO:0005739(mitochondrion);GO:0005743(mitochondrial inner membrane);GO:0005751(mitochondrial respiratory chain complex IV);GO:0006091(generation of precursor metabolites and energy);GO:0006123(mitochondrial electron transport, cytochrome c to oxygen);GO:0007584(response to nutrient);GO:0016020(membrane);GO:00…	00190(Oxidative phosphorylation);04260(Cardiac muscle contraction);04714(Thermogenesis);04932(Non-alcoholic fatty liver disease (NAFLD));05010(Alzheimer disease);05012(Parkinson disease);05016(Huntington disease)	NA	NA
2	ENSG00000105193	RPS16	19.7146	15.6328	0.334683	2.85339e-71	1.23934e-66	ribosomal protein S16 [Source:HGNC Symbol;Acc:HGNC:10396]	GO:0000184(nuclear-transcribed mRNA catabolic process, nonsense-mediated decay);GO:0000462(maturation of SSU-rRNA from tricistronic rRNA transcript (SSU-rRNA, 5.8S rRNA, LSU-rRNA));GO:0003723(RNA binding);GO:0003735(structural constituent of ribosome);GO:0005515(protein binding);GO:0005654(nucleoplasm);GO:0005829(cytosol);GO:0005840(ribosome);GO:0005925(focal adhesion);GO:0006364(rRNA processing)…	03010(Ribosome)	K02960	NA
2	ENSG00000115165	CYTIP	1.28045	0.907901	0.496045	4.09218e-71	1.7774e-66	cytohesin 1 interacting protein [Source:HGNC Symbol;Acc:HGNC:9506]	GO:0005515(protein binding);GO:0005654(nucleoplasm);GO:0005737(cytoplasm);GO:0005768(endosome);GO:0005769(early endosome);GO:0005829(cytosol);GO:0005938(cell cortex);GO:0030155(regulation of cell adhesion)	NA	NA	NA
2	ENSG00000126883	NUP214	1.72296	1.2339	0.481667	4.11101e-71	1.78558e-66	nucleoporin 214 [Source:HGNC Symbol;Acc:HGNC:8064]	GO:0000278(mitotic cell cycle);GO:0005049(nuclear export signal receptor activity);GO:0005515(protein binding);GO:0005634(nucleus);GO:0005635(nuclear envelope);GO:0005643(nuclear pore);GO:0005654(nucleoplasm);GO:0005829(cytosol);GO:0005925(focal adhesion);GO:0006110(regulation of glycolytic process);GO:0006406(mRNA export from nucleus);GO:0006409(tRNA export from nucleus);GO:0006606(protein impor…	03013(RNA transport)	NA	NA
2	ENSG00000142657	PGD	1.97423	1.46237	0.43298	4.52991e-71	1.96752e-66	phosphogluconate dehydrogenase [Source:HGNC Symbol;Acc:HGNC:8891]	GO:0004616(phosphogluconate dehydrogenase (decarboxylating) activity);GO:0005634(nucleus);GO:0005737(cytoplasm);GO:0005829(cytosol);GO:0006098(pentose-phosphate shunt);GO:0009051(pentose-phosphate shunt, oxidative branch);GO:0016491(oxidoreductase activity);GO:0019322(pentose biosynthetic process);GO:0019521(D-gluconate metabolic process);GO:0050661(NADP binding);GO:0055114(oxidation-reduction pr…	00030(Pentose phosphate pathway);00480(Glutathione metabolism)	K00033	1.1.1.343;EC:1.1.1.44
2	ENSG00000271614	ATP2B1-AS1	3.89857	2.71092	0.524162	2.2998e-70	9.98896e-66	ATP2B1 antisense RNA 1 [Source:HGNC Symbol;Acc:HGNC:27883]	NA	NA	NA	NA
2	ENSG00000142634	EFHD2	6.01209	4.54793	0.402657	2.60944e-70	1.13338e-65	EF-hand domain family member D2 [Source:HGNC Symbol;Acc:HGNC:28670]	GO:0005509(calcium ion binding);GO:0016020(membrane);GO:0045121(membrane raft);GO:0045296(cadherin binding);GO:0046872(metal ion binding)	NA	NA	NA
2	ENSG00000151726	ACSL1	3.23841	2.32914	0.475492	3.81424e-69	1.65668e-64	acyl-CoA synthetase long chain family member 1 [Source:HGNC Symbol;Acc:HGNC:3569]	GO:0000166(nucleotide binding);GO:0001676(long-chain fatty acid metabolic process);GO:0003824(catalytic activity);GO:0004467(long-chain fatty acid-CoA ligase activity);GO:0005524(ATP binding);GO:0005739(mitochondrion);GO:0005741(mitochondrial outer membrane);GO:0005777(peroxisome);GO:0005778(peroxisomal membrane);GO:0005783(endoplasmic reticulum);GO:0005789(endoplasmic reticulum membrane);GO:0005…	00061(Fatty acid biosynthesis);00071(Fatty acid degradation);03320(PPAR signaling pathway);04146(Peroxisome);04216(Ferroptosis);04714(Thermogenesis);04920(Adipocytokine signaling pathway)	K01897	EC:6.2.1.3
2	ENSG00000064666	CNN2	1.59146	1.14214	0.478616	1.00055e-68	4.34578e-64	calponin 2 [Source:HGNC Symbol;Acc:HGNC:2156]	GO:0001725(stress fiber);GO:0003779(actin binding);GO:0005515(protein binding);GO:0005516(calmodulin binding);GO:0005576(extracellular region);GO:0005856(cytoskeleton);GO:0005911(cell-cell junction);GO:0005925(focal adhesion);GO:0007010(cytoskeleton organization);GO:0010628(positive regulation of gene expression);GO:0016020(membrane);GO:0030097(hemopoiesis);GO:0030336(negative regulation of cell …	NA	NA	NA
2	ENSG00000134419	RPS15A	14.4562	11.2289	0.364478	1.01749e-68	4.41935e-64	ribosomal protein S15a [Source:HGNC Symbol;Acc:HGNC:10389]	GO:0000184(nuclear-transcribed mRNA catabolic process, nonsense-mediated decay);GO:0003723(RNA binding);GO:0003735(structural constituent of ribosome);GO:0005515(protein binding);GO:0005654(nucleoplasm);GO:0005737(cytoplasm);GO:0005829(cytosol);GO:0005840(ribosome);GO:0006412(translation);GO:0006413(translational initiation);GO:0006614(SRP-dependent cotranslational protein targeting to membrane);…	03010(Ribosome)	K02957	NA
2	ENSG00000177954	RPS27	18.199	14.3085	0.346987	2.14243e-68	9.30544e-64	ribosomal protein S27 [Source:HGNC Symbol;Acc:HGNC:10416]	GO:0000028(ribosomal small subunit assembly);GO:0000184(nuclear-transcribed mRNA catabolic process, nonsense-mediated decay);GO:0003677(DNA binding);GO:0003723(RNA binding);GO:0003735(structural constituent of ribosome);GO:0005515(protein binding);GO:0005622(intracellular);GO:0005634(nucleus);GO:0005654(nucleoplasm);GO:0005829(cytosol);GO:0005840(ribosome);GO:0006364(rRNA processing);GO:0006412(t…	03010(Ribosome)	K02978	NA
2	ENSG00000127951	FGL2	2.55229	1.74373	0.54962	2.72953e-68	1.18554e-63	fibrinogen like 2 [Source:HGNC Symbol;Acc:HGNC:3696]	GO:0005201(extracellular matrix structural constituent);GO:0005576(extracellular region);GO:0005577(fibrinogen complex);GO:0006508(proteolysis);GO:0008233(peptidase activity);GO:0043312(neutrophil degranulation);GO:0062023(collagen-containing extracellular matrix);GO:0070062(extracellular exosome);GO:1904813(ficolin-1-rich granule lumen)	NA	NA	NA
2	ENSG00000111275	ALDH2	1.46656	1.04516	0.488712	3.80134e-68	1.65108e-63	aldehyde dehydrogenase 2 family member [Source:HGNC Symbol;Acc:HGNC:404]	GO:0004029(aldehyde dehydrogenase (NAD) activity);GO:0004030(aldehyde dehydrogenase [NAD(P)+] activity);GO:0005739(mitochondrion);GO:0005759(mitochondrial matrix);GO:0005975(carbohydrate metabolic process);GO:0006066(alcohol metabolic process);GO:0006068(ethanol catabolic process);GO:0006069(ethanol oxidation);GO:0009055(electron transfer activity);GO:0016491(oxidoreductase activity);GO:0016620(o…	00010(Glycolysis / Gluconeogenesis);00053(Ascorbate and aldarate metabolism);00071(Fatty acid degradation);00280(Valine, leucine and isoleucine degradation);00310(Lysine degradation);00330(Arginine and proline metabolism);00340(Histidine metabolism);00380(Tryptophan metabolism);00410(beta-Alanine metabolism);00561(Glycerolipid metabolism);00620(Pyruvate metabolism)	NA	NA
2	ENSG00000137752	CASP1	1.19934	0.880825	0.44531	4.11169e-68	1.78587e-63	caspase 1 [Source:HGNC Symbol;Acc:HGNC:1499]	GO:0004175(endopeptidase activity);GO:0004197(cysteine-type endopeptidase activity);GO:0005515(protein binding);GO:0005737(cytoplasm);GO:0005829(cytosol);GO:0006508(proteolysis);GO:0006915(apoptotic process);GO:0006919(activation of cysteine-type endopeptidase activity involved in apoptotic process);GO:0007165(signal transduction);GO:0008233(peptidase activity);GO:0008234(cysteine-type peptidase …	04217(Necroptosis);04621(NOD-like receptor signaling pathway);04623(Cytosolic DNA-sensing pathway);04625(C-type lectin receptor signaling pathway);05014(Amyotrophic lateral sclerosis (ALS));05132(Salmonella infection);05133(Pertussis);05134(Legionellosis);05164(Influenza A)	NA	NA
2	ENSG00000168769	TET2	2.79664	1.98291	0.496073	4.76004e-68	2.06747e-63	tet methylcytosine dioxygenase 2 [Source:HGNC Symbol;Acc:HGNC:25941]	GO:0003677(DNA binding);GO:0005506(iron ion binding);GO:0005515(protein binding);GO:0005634(nucleus);GO:0006211(5-methylcytosine catabolic process);GO:0006325(chromatin organization);GO:0006493(protein O-linked glycosylation);GO:0007049(cell cycle);GO:0008198(ferrous iron binding);GO:0008270(zinc ion binding);GO:0014070(response to organic cyclic compound);GO:0016491(oxidoreductase activity);GO:0…	NA	NA	NA
2	ENSG00000099985	OSM	0.910432	0.642857	0.502052	8.62679e-68	3.74696e-63	oncostatin M [Source:HGNC Symbol;Acc:HGNC:8506]	GO:0002675(positive regulation of acute inflammatory response);GO:0005125(cytokine activity);GO:0005147(oncostatin-M receptor binding);GO:0005576(extracellular region);GO:0005615(extracellular space);GO:0006955(immune response);GO:0007275(multicellular organism development);GO:0008083(growth factor activity);GO:0008283(cell population proliferation);GO:0008284(positive regulation of cell populati…	04060(Cytokine-cytokine receptor interaction);04151(PI3K-Akt signaling pathway);04630(Jak-STAT signaling pathway)	K05418	NA
2	ENSG00000143110	C1orf162	6.37547	4.86342	0.390561	1.71296e-67	7.44009e-63	chromosome 1 open reading frame 162 [Source:HGNC Symbol;Acc:HGNC:28344]	GO:0016020(membrane);GO:0016021(integral component of membrane)	NA	NA	NA
2	ENSG00000196562	SULF2	0.661244	0.493382	0.422477	9.48913e-67	4.12151e-62	sulfatase 2 [Source:HGNC Symbol;Acc:HGNC:20392]	GO:0001822(kidney development);GO:0002063(chondrocyte development);GO:0003094(glomerular filtration);GO:0003824(catalytic activity);GO:0004065(arylsulfatase activity);GO:0005509(calcium ion binding);GO:0005539(glycosaminoglycan binding);GO:0005615(extracellular space);GO:0005783(endoplasmic reticulum);GO:0005794(Golgi apparatus);GO:0005795(Golgi stack);GO:0005886(plasma membrane);GO:0008449(N-ace…	NA	K14607	EC:3.1.6.-
2	ENSG00000177674	AGTRAP	1.49386	1.08732	0.458261	1.95746e-66	8.50202e-62	angiotensin II receptor associated protein [Source:HGNC Symbol;Acc:HGNC:13539]	GO:0000139(Golgi membrane);GO:0001666(response to hypoxia);GO:0004945(angiotensin type II receptor activity);GO:0005515(protein binding);GO:0005654(nucleoplasm);GO:0005783(endoplasmic reticulum);GO:0005789(endoplasmic reticulum membrane);GO:0005794(Golgi apparatus);GO:0005829(cytosol);GO:0005886(plasma membrane);GO:0005938(cell cortex);GO:0008217(regulation of blood pressure);GO:0016020(membrane)…	NA	NA	NA
2	ENSG00000070961	ATP2B1	4.42706	3.23303	0.453465	4.53119e-66	1.96808e-61	ATPase plasma membrane Ca2+ transporting 1 [Source:HGNC Symbol;Acc:HGNC:814]	GO:0000166(nucleotide binding);GO:0001772(immunological synapse);GO:0001818(negative regulation of cytokine production);GO:0003056(regulation of vascular smooth muscle contraction);GO:0003407(neural retina development);GO:0005388(calcium-transporting ATPase activity);GO:0005515(protein binding);GO:0005516(calmodulin binding);GO:0005524(ATP binding);GO:0005634(nucleus);GO:0005886(plasma membrane);…	04020(Calcium signaling pathway);04022(cGMP-PKG signaling pathway);04024(cAMP signaling pathway);04261(Adrenergic signaling in cardiomyocytes);04925(Aldosterone synthesis and secretion);04961(Endocrine and other factor-regulated calcium reabsorption);04970(Salivary secretion);04972(Pancreatic secretion);04978(Mineral absorption)	NA	NA
2	ENSG00000142534	RPS11	18.8948	15.2613	0.308111	4.83337e-66	2.09932e-61	ribosomal protein S11 [Source:HGNC Symbol;Acc:HGNC:10384]	GO:0000184(nuclear-transcribed mRNA catabolic process, nonsense-mediated decay);GO:0003723(RNA binding);GO:0003735(structural constituent of ribosome);GO:0005515(protein binding);GO:0005622(intracellular);GO:0005654(nucleoplasm);GO:0005730(nucleolus);GO:0005737(cytoplasm);GO:0005829(cytosol);GO:0005840(ribosome);GO:0005925(focal adhesion);GO:0006412(translation);GO:0006413(translational initiatio…	03010(Ribosome)	K02949	NA
2	ENSG00000132475	H3F3B	13.3664	10.6008	0.334436	8.4688e-66	3.67834e-61	H3 histone family member 3B [Source:HGNC Symbol;Acc:HGNC:4765]	GO:0000183(chromatin silencing at rDNA);GO:0000228(nuclear chromosome);GO:0000784(nuclear chromosome, telomeric region);GO:0000786(nucleosome);GO:0000788(nuclear nucleosome);GO:0000979(RNA polymerase II core promoter sequence-specific DNA binding);GO:0000980(RNA polymerase II distal enhancer sequence-specific DNA binding);GO:0003677(DNA binding);GO:0005515(protein binding);GO:0005576(extracellula…	05034(Alcoholism);05202(Transcriptional misregulation in cancer);05322(Systemic lupus erythematosus)	K11253	NA
2	ENSG00000155926	SLA	5.07483	3.77733	0.425992	1.20351e-65	5.22731e-61	Src like adaptor [Source:HGNC Symbol;Acc:HGNC:10902]	GO:0004715(non-membrane spanning protein tyrosine kinase activity);GO:0005070(SH3/SH2 adaptor activity);GO:0005515(protein binding);GO:0005737(cytoplasm);GO:0005768(endosome);GO:0009966(regulation of signal transduction);GO:0009967(positive regulation of signal transduction);GO:0030154(cell differentiation);GO:0038083(peptidyl-tyrosine autophosphorylation);GO:0042127(regulation of cell population…	NA	NA	NA
2	ENSG00000128340	RAC2	2.12506	1.56224	0.443894	2.64619e-65	1.14935e-60	Rac family small GTPase 2 [Source:HGNC Symbol;Acc:HGNC:9802]	GO:0000166(nucleotide binding);GO:0003924(GTPase activity);GO:0005515(protein binding);GO:0005525(GTP binding);GO:0005622(intracellular);GO:0005635(nuclear envelope);GO:0005737(cytoplasm);GO:0005829(cytosol);GO:0005884(actin filament);GO:0005886(plasma membrane);GO:0005925(focal adhesion);GO:0006935(chemotaxis);GO:0007015(actin filament organization);GO:0007165(signal transduction);GO:0007186(G p…	04010(MAPK signaling pathway);04014(Ras signaling pathway);04015(Rap1 signaling pathway);04024(cAMP signaling pathway);04062(Chemokine signaling pathway);04071(Sphingolipid signaling pathway);04310(Wnt signaling pathway);04360(Axon guidance);04370(VEGF signaling pathway);04510(Focal adhesion);04520(Adherens junction);04650(Natural killer cell mediated cytotoxicity);04662(B cell receptor signaling…	K07860	NA
2	ENSG00000092841	MYL6	19.3478	15.3413	0.334751	9.59258e-65	4.16644e-60	myosin light chain 6 [Source:HGNC Symbol;Acc:HGNC:7587]	GO:0003774(motor activity);GO:0005509(calcium ion binding);GO:0005515(protein binding);GO:0005829(cytosol);GO:0005903(brush border);GO:0006936(muscle contraction);GO:0007519(skeletal muscle tissue development);GO:0008307(structural constituent of muscle);GO:0016020(membrane);GO:0016459(myosin complex);GO:0016461(unconventional myosin complex);GO:0030049(muscle filament sliding);GO:0030898(actin-d…	04270(Vascular smooth muscle contraction);04530(Tight junction);04921(Oxytocin signaling pathway)	K12751	NA
2	ENSG00000108179	PPIF	2.71764	1.87244	0.537431	4.21988e-64	1.83286e-59	peptidylprolyl isomerase F [Source:HGNC Symbol;Acc:HGNC:9259]	GO:0000413(protein peptidyl-prolyl isomerization);GO:0002931(response to ischemia);GO:0003755(peptidyl-prolyl cis-trans isomerase activity);GO:0005515(protein binding);GO:0005739(mitochondrion);GO:0005743(mitochondrial inner membrane);GO:0005753(mitochondrial proton-transporting ATP synthase complex);GO:0005757(mitochondrial permeability transition pore complex);GO:0005759(mitochondrial matrix);G…	04020(Calcium signaling pathway);04022(cGMP-PKG signaling pathway);05012(Parkinson disease);05016(Huntington disease);05145(Toxoplasmosis)	K09565	EC:5.2.1.8
2	ENSG00000133639	BTG1	15.2638	11.6278	0.39254	1.71293e-63	7.43994e-59	BTG anti-proliferation factor 1 [Source:HGNC Symbol;Acc:HGNC:1130]	GO:0003712(transcription coregulator activity);GO:0005515(protein binding);GO:0005634(nucleus);GO:0005654(nucleoplasm);GO:0005737(cytoplasm);GO:0006355(regulation of transcription, DNA-templated);GO:0008285(negative regulation of cell population proliferation);GO:0016477(cell migration);GO:0019899(enzyme binding);GO:0019900(kinase binding);GO:0030308(negative regulation of cell growth);GO:0045603…	03018(RNA degradation)	NA	NA
2	ENSG00000136286	MYO1G	1.72586	1.24538	0.470732	1.73082e-63	7.51765e-59	myosin IG [Source:HGNC Symbol;Acc:HGNC:13880]	GO:0000166(nucleotide binding);GO:0001891(phagocytic cup);GO:0002250(adaptive immune response);GO:0002376(immune system process);GO:0002456(T cell mediated immunity);GO:0003774(motor activity);GO:0003779(actin binding);GO:0005516(calmodulin binding);GO:0005524(ATP binding);GO:0005546(phosphatidylinositol-4,5-bisphosphate binding);GO:0005547(phosphatidylinositol-3,4,5-trisphosphate binding);GO:000…	NA	K10356	NA
2	ENSG00000229117	RPL41	28.8658	24.0996	0.260355	2.61961e-63	1.1378e-58	ribosomal protein L41 [Source:HGNC Symbol;Acc:HGNC:10354]	GO:0000184(nuclear-transcribed mRNA catabolic process, nonsense-mediated decay);GO:0002181(cytoplasmic translation);GO:0003723(RNA binding);GO:0003730(mRNA 3'-UTR binding);GO:0003735(structural constituent of ribosome);GO:0005829(cytosol);GO:0005840(ribosome);GO:0006412(translation);GO:0006413(translational initiation);GO:0006614(SRP-dependent cotranslational protein targeting to membrane);GO:001…	03010(Ribosome)	K02928	NA
2	ENSG00000088992	TESC	0.426483	0.335025	0.348219	6.90578e-63	2.99946e-58	tescalcin [Source:HGNC Symbol;Acc:HGNC:26065]	GO:0000287(magnesium ion binding);GO:0001726(ruffle);GO:0004860(protein kinase inhibitor activity);GO:0005509(calcium ion binding);GO:0005515(protein binding);GO:0005634(nucleus);GO:0005737(cytoplasm);GO:0005829(cytosol);GO:0005886(plasma membrane);GO:0006469(negative regulation of protein kinase activity);GO:0008285(negative regulation of cell population proliferation);GO:0008584(male gonad deve…	NA	K17612	NA
2	ENSG00000158473	CD1D	0.358244	0.285823	0.325822	2.68295e-62	1.16531e-57	CD1d molecule [Source:HGNC Symbol;Acc:HGNC:1637]	GO:0001916(positive regulation of T cell mediated cytotoxicity);GO:0002376(immune system process);GO:0005515(protein binding);GO:0005615(extracellular space);GO:0005737(cytoplasm);GO:0005764(lysosome);GO:0005765(lysosomal membrane);GO:0005768(endosome);GO:0005783(endoplasmic reticulum);GO:0005789(endoplasmic reticulum membrane);GO:0005886(plasma membrane);GO:0005887(integral component of plasma m…	04530(Tight junction);04640(Hematopoietic cell lineage);05146(Amoebiasis)	NA	NA
2	ENSG00000125505	MBOAT7	1.41059	1.00482	0.48936	5.11126e-62	2.22002e-57	membrane bound O-acyltransferase domain containing 7 [Source:HGNC Symbol;Acc:HGNC:15505]	GO:0003841(1-acylglycerol-3-phosphate O-acyltransferase activity);GO:0005515(protein binding);GO:0005783(endoplasmic reticulum);GO:0005789(endoplasmic reticulum membrane);GO:0006629(lipid metabolic process);GO:0006644(phospholipid metabolic process);GO:0008654(phospholipid biosynthetic process);GO:0016020(membrane);GO:0016021(integral component of membrane);GO:0016740(transferase activity);GO:001…	00564(Glycerophospholipid metabolism)	K13516	EC:2.3.1.-
2	ENSG00000130066	SAT1	26.3136	21.5034	0.291242	7.46588e-62	3.24273e-57	spermidine/spermine N1-acetyltransferase 1 [Source:HGNC Symbol;Acc:HGNC:10540]	GO:0001525(angiogenesis);GO:0004145(diamine N-acetyltransferase activity);GO:0005515(protein binding);GO:0005622(intracellular);GO:0005737(cytoplasm);GO:0005829(cytosol);GO:0006595(polyamine metabolic process);GO:0006596(polyamine biosynthetic process);GO:0006598(polyamine catabolic process);GO:0008080(N-acetyltransferase activity);GO:0009447(putrescine catabolic process);GO:0016740(transferase a…	00330(Arginine and proline metabolism);04216(Ferroptosis)	NA	NA
2	ENSG00000113448	PDE4D	0.738711	0.538176	0.456933	8.50636e-62	3.69465e-57	phosphodiesterase 4D [Source:HGNC Symbol;Acc:HGNC:8783]	GO:0002027(regulation of heart rate);GO:0004114(3',5'-cyclic-nucleotide phosphodiesterase activity);GO:0004115(3',5'-cyclic-AMP phosphodiesterase activity);GO:0005515(protein binding);GO:0005737(cytoplasm);GO:0005813(centrosome);GO:0005815(microtubule organizing center);GO:0005829(cytosol);GO:0005856(cytoskeleton);GO:0005886(plasma membrane);GO:0005891(voltage-gated calcium channel complex);GO:00…	00230(Purine metabolism);04024(cAMP signaling pathway);04928(Parathyroid hormone synthesis, secretion and action);05032(Morphine addiction)	NA	NA
2	ENSG00000127824	TUBA4A	1.11058	0.799621	0.473924	1.13104e-61	4.91257e-57	tubulin alpha 4a [Source:HGNC Symbol;Acc:HGNC:12407]	GO:0000086(G2/M transition of mitotic cell cycle);GO:0000166(nucleotide binding);GO:0000226(microtubule cytoskeleton organization);GO:0000278(mitotic cell cycle);GO:0002576(platelet degranulation);GO:0003924(GTPase activity);GO:0005200(structural constituent of cytoskeleton);GO:0005515(protein binding);GO:0005525(GTP binding);GO:0005576(extracellular region);GO:0005737(cytoplasm);GO:0005829(cytos…	04145(Phagosome);04210(Apoptosis);04530(Tight junction);04540(Gap junction);05130(Pathogenic Escherichia coli infection)	K07374	NA
2	ENSG00000266094	RASSF5	1.24353	0.899522	0.467214	2.92086e-61	1.26865e-56	Ras association domain family member 5 [Source:HGNC Symbol;Acc:HGNC:17609]	GO:0005515(protein binding);GO:0005634(nucleus);GO:0005737(cytoplasm);GO:0005856(cytoskeleton);GO:0005874(microtubule);GO:0006915(apoptotic process);GO:0007165(signal transduction);GO:0008285(negative regulation of cell population proliferation);GO:0017016(Ras GTPase binding);GO:0031398(positive regulation of protein ubiquitination);GO:0035556(intracellular signal transduction);GO:0042981(regulat…	04014(Ras signaling pathway);04015(Rap1 signaling pathway);04218(Cellular senescence);04670(Leukocyte transendothelial migration);05200(Pathways in cancer);05223(Non-small cell lung cancer)	K08015	NA
2	ENSG00000131042	LILRB2	2.69695	2.01752	0.418748	1.41951e-60	6.1655e-56	leukocyte immunoglobulin like receptor B2 [Source:HGNC Symbol;Acc:HGNC:6606]	GO:0001540(amyloid-beta binding);GO:0002250(adaptive immune response);GO:0002376(immune system process);GO:0002578(negative regulation of antigen processing and presentation);GO:0002645(positive regulation of tolerance induction);GO:0002666(positive regulation of T cell tolerance induction);GO:0002767(immune response-inhibiting cell surface receptor signaling pathway);GO:0002774(Fc receptor media…	04380(Osteoclast differentiation)	K06512	NA
2	ENSG00000140105	WARS	0.947722	0.706051	0.424691	1.52001e-60	6.602e-56	tryptophanyl-tRNA synthetase [Source:HGNC Symbol;Acc:HGNC:12729]	GO:0000166(nucleotide binding);GO:0001525(angiogenesis);GO:0001933(negative regulation of protein phosphorylation);GO:0004812(aminoacyl-tRNA ligase activity);GO:0004830(tryptophan-tRNA ligase activity);GO:0005515(protein binding);GO:0005524(ATP binding);GO:0005634(nucleus);GO:0005737(cytoplasm);GO:0005829(cytosol);GO:0006412(translation);GO:0006418(tRNA aminoacylation for protein translation);GO:…	00970(Aminoacyl-tRNA biosynthesis)	K01867	EC:6.1.1.2
2	ENSG00000184557	SOCS3	3.41459	2.46762	0.468592	2.49427e-59	1.08336e-54	suppressor of cytokine signaling 3 [Source:HGNC Symbol;Acc:HGNC:19391]	GO:0001784(phosphotyrosine residue binding);GO:0001932(regulation of protein phosphorylation);GO:0004860(protein kinase inhibitor activity);GO:0005515(protein binding);GO:0005829(cytosol);GO:0005942(phosphatidylinositol 3-kinase complex);GO:0006469(negative regulation of protein kinase activity);GO:0007259(receptor signaling pathway via JAK-STAT);GO:0009968(negative regulation of signal transduct…	04120(Ubiquitin mediated proteolysis);04380(Osteoclast differentiation);04630(Jak-STAT signaling pathway);04668(TNF signaling pathway);04910(Insulin signaling pathway);04917(Prolactin signaling pathway);04920(Adipocytokine signaling pathway);04930(Type II diabetes mellitus);04931(Insulin resistance);04932(Non-alcoholic fatty liver disease (NAFLD));05160(Hepatitis C);05164(Influenza A);05168(Herpe…	K04696	NA
2	ENSG00000113368	LMNB1	0.382295	0.30212	0.339566	4.67003e-59	2.02838e-54	lamin B1 [Source:HGNC Symbol;Acc:HGNC:6637]	GO:0003690(double-stranded DNA binding);GO:0005198(structural molecule activity);GO:0005515(protein binding);GO:0005634(nucleus);GO:0005635(nuclear envelope);GO:0005637(nuclear inner membrane);GO:0005638(lamin filament);GO:0005654(nucleoplasm);GO:0005882(intermediate filament);GO:0016020(membrane);GO:0016363(nuclear matrix);GO:0031965(nuclear membrane);GO:0035722(interleukin-12-mediated signaling…	04210(Apoptosis)	K07611	NA
2	ENSG00000197766	CFD	3.00674	2.25971	0.412059	7.24547e-59	3.147e-54	complement factor D [Source:HGNC Symbol;Acc:HGNC:2771]	GO:0002376(immune system process);GO:0002576(platelet degranulation);GO:0004252(serine-type endopeptidase activity);GO:0005576(extracellular region);GO:0005615(extracellular space);GO:0006508(proteolysis);GO:0006956(complement activation);GO:0006957(complement activation, alternative pathway);GO:0008233(peptidase activity);GO:0008236(serine-type peptidase activity);GO:0009617(response to bacteriu…	04610(Complement and coagulation cascades);05150(Staphylococcus aureus infection)	K01334	EC:3.4.21.46
2	ENSG00000103490	PYCARD	3.06892	2.32951	0.397705	1.57593e-58	6.84491e-54	PYD and CARD domain containing [Source:HGNC Symbol;Acc:HGNC:16608]	GO:0000139(Golgi membrane);GO:0001773(myeloid dendritic cell activation);GO:0002020(protease binding);GO:0002218(activation of innate immune response);GO:0002230(positive regulation of defense response to virus by host);GO:0002277(myeloid dendritic cell activation involved in immune response);GO:0002376(immune system process);GO:0002588(positive regulation of antigen processing and presentation o…	04217(Necroptosis);04621(NOD-like receptor signaling pathway);04623(Cytosolic DNA-sensing pathway);04625(C-type lectin receptor signaling pathway);05132(Salmonella infection);05133(Pertussis);05134(Legionellosis);05164(Influenza A)	K12799	NA
2	ENSG00000108298	RPL19	21.7188	17.6754	0.297199	2.61273e-58	1.13481e-53	ribosomal protein L19 [Source:HGNC Symbol;Acc:HGNC:10312]	GO:0000184(nuclear-transcribed mRNA catabolic process, nonsense-mediated decay);GO:0002181(cytoplasmic translation);GO:0003723(RNA binding);GO:0003735(structural constituent of ribosome);GO:0005515(protein binding);GO:0005622(intracellular);GO:0005829(cytosol);GO:0005840(ribosome);GO:0005925(focal adhesion);GO:0006412(translation);GO:0006413(translational initiation);GO:0006614(SRP-dependent cotr…	03010(Ribosome)	K02885	NA
2	ENSG00000095794	CREM	3.03267	2.25544	0.427181	2.7007e-58	1.17302e-53	cAMP responsive element modulator [Source:HGNC Symbol;Acc:HGNC:2352]	GO:0000122(negative regulation of transcription by RNA polymerase II);GO:0000977(RNA polymerase II regulatory region sequence-specific DNA binding);GO:0000981(DNA-binding transcription factor activity, RNA polymerase II-specific);GO:0001227(DNA-binding transcription repressor activity, RNA polymerase II-specific);GO:0003677(DNA binding);GO:0003700(DNA-binding transcription factor activity);GO:000…	04261(Adrenergic signaling in cardiomyocytes)	K09052	NA
2	ENSG00000136250	AOAH	0.71587	0.539989	0.406768	5.38863e-58	2.3405e-53	acyloxyacyl hydrolase [Source:HGNC Symbol;Acc:HGNC:548]	GO:0005509(calcium ion binding);GO:0005576(extracellular region);GO:0006629(lipid metabolic process);GO:0006631(fatty acid metabolic process);GO:0008653(lipopolysaccharide metabolic process);GO:0009104(lipopolysaccharide catabolic process);GO:0016787(hydrolase activity);GO:0016788(hydrolase activity, acting on ester bonds);GO:0031410(cytoplasmic vesicle);GO:0046872(metal ion binding);GO:0050528(a…	NA	NA	NA
2	ENSG00000104529	EEF1D	6.44099	5.17831	0.314802	6.92357e-58	3.00718e-53	eukaryotic translation elongation factor 1 delta [Source:HGNC Symbol;Acc:HGNC:3211]	GO:0001650(fibrillar center);GO:0003677(DNA binding);GO:0003746(translation elongation factor activity);GO:0005515(protein binding);GO:0005634(nucleus);GO:0005737(cytoplasm);GO:0005783(endoplasmic reticulum);GO:0005829(cytosol);GO:0005853(eukaryotic translation elongation factor 1 complex);GO:0006412(translation);GO:0006414(translational elongation);GO:0008135(translation factor activity, RNA bin…	NA	K15410	NA
2	ENSG00000204577	LILRB3	2.23883	1.67933	0.414859	1.07174e-57	4.65499e-53	leukocyte immunoglobulin like receptor B3 [Source:HGNC Symbol;Acc:HGNC:6607]	GO:0002250(adaptive immune response);GO:0002376(immune system process);GO:0004888(transmembrane signaling receptor activity);GO:0005515(protein binding);GO:0005886(plasma membrane);GO:0005887(integral component of plasma membrane);GO:0006952(defense response);GO:0007166(cell surface receptor signaling pathway);GO:0016020(membrane);GO:0016021(integral component of membrane);GO:0030667(secretory gr…	04380(Osteoclast differentiation);04662(B cell receptor signaling pathway)	K06512	NA
2	ENSG00000140678	ITGAX	2.31318	1.69887	0.445301	1.57055e-57	6.82151e-53	integrin subunit alpha X [Source:HGNC Symbol;Acc:HGNC:6152]	GO:0005515(protein binding);GO:0005886(plasma membrane);GO:0007155(cell adhesion);GO:0007229(integrin-mediated signaling pathway);GO:0008305(integrin complex);GO:0009887(animal organ morphogenesis);GO:0009897(external side of plasma membrane);GO:0009986(cell surface);GO:0016020(membrane);GO:0016021(integral component of membrane);GO:0019221(cytokine-mediated signaling pathway);GO:0030198(extracel…	04610(Complement and coagulation cascades);04810(Regulation of actin cytoskeleton);05152(Tuberculosis)	K06462	NA
2	ENSG00000102524	TNFSF13B	1.26106	0.897001	0.491454	1.6519e-57	7.17485e-53	TNF superfamily member 13b [Source:HGNC Symbol;Acc:HGNC:11929]	GO:0001782(B cell homeostasis);GO:0002376(immune system process);GO:0002636(positive regulation of germinal center formation);GO:0005102(signaling receptor binding);GO:0005125(cytokine activity);GO:0005164(tumor necrosis factor receptor binding);GO:0005515(protein binding);GO:0005576(extracellular region);GO:0005615(extracellular space);GO:0005737(cytoplasm);GO:0005886(plasma membrane);GO:0006955…	04060(Cytokine-cytokine receptor interaction);04064(NF-kappa B signaling pathway);04672(Intestinal immune network for IgA production);05323(Rheumatoid arthritis)	K05476	NA
2	ENSG00000106780	MEGF9	1.11593	0.818971	0.446359	2.29309e-57	9.9598e-53	multiple EGF like domains 9 [Source:HGNC Symbol;Acc:HGNC:3234]	GO:0005575(cellular_component);GO:0005604(basement membrane);GO:0008150(biological_process);GO:0016020(membrane);GO:0016021(integral component of membrane)	NA	NA	NA
2	ENSG00000169895	SYAP1	2.00319	1.48807	0.428861	7.15474e-57	3.10759e-52	synapse associated protein 1 [Source:HGNC Symbol;Acc:HGNC:16273]	GO:0005515(protein binding);GO:0005634(nucleus);GO:0005654(nucleoplasm);GO:0005737(cytoplasm);GO:0005794(Golgi apparatus);GO:0005829(cytosol);GO:0005886(plasma membrane);GO:0016020(membrane);GO:0030054(cell junction);GO:0030154(cell differentiation);GO:0030424(axon);GO:0030425(dendrite);GO:0030426(growth cone);GO:0031234(extrinsic component of cytoplasmic side of plasma membrane);GO:0032869(cellu…	NA	NA	NA
2	ENSG00000140332	TLE3	1.53661	1.13242	0.440332	1.04708e-56	4.5479e-52	TLE family member 3, transcriptional corepressor [Source:HGNC Symbol;Acc:HGNC:11839]	GO:0003714(transcription corepressor activity);GO:0005515(protein binding);GO:0005634(nucleus);GO:0005654(nucleoplasm);GO:0005667(transcription factor complex);GO:0006355(regulation of transcription, DNA-templated);GO:0007165(signal transduction);GO:0009887(animal organ morphogenesis);GO:0016055(Wnt signaling pathway);GO:0070491(repressing transcription factor binding);GO:0090090(negative regulat…	NA	NA	NA
2	ENSG00000069974	RAB27A	0.779193	0.58662	0.409554	1.44553e-56	6.2785e-52	RAB27A, member RAS oncogene family [Source:HGNC Symbol;Acc:HGNC:9766]	GO:0000166(nucleotide binding);GO:0001750(photoreceptor outer segment);GO:0003924(GTPase activity);GO:0005515(protein binding);GO:0005525(GTP binding);GO:0005576(extracellular region);GO:0005764(lysosome);GO:0005768(endosome);GO:0005770(late endosome);GO:0005794(Golgi apparatus);GO:0005829(cytosol);GO:0006605(protein targeting);GO:0006886(intracellular protein transport);GO:0006887(exocytosis);GO…	NA	K07885	NA
2	ENSG00000233927	RPS28	18.0046	14.9885	0.264509	5.1367e-56	2.23108e-51	ribosomal protein S28 [Source:HGNC Symbol;Acc:HGNC:10418]	GO:0000028(ribosomal small subunit assembly);GO:0000184(nuclear-transcribed mRNA catabolic process, nonsense-mediated decay);GO:0002181(cytoplasmic translation);GO:0003723(RNA binding);GO:0003735(structural constituent of ribosome);GO:0005515(protein binding);GO:0005622(intracellular);GO:0005654(nucleoplasm);GO:0005737(cytoplasm);GO:0005783(endoplasmic reticulum);GO:0005791(rough endoplasmic reti…	03010(Ribosome)	K02979	NA
2	ENSG00000135241	PNPLA8	1.70006	1.28233	0.406819	3.32749e-55	1.44526e-50	patatin like phospholipase domain containing 8 [Source:HGNC Symbol;Acc:HGNC:28900]	GO:0000139(Golgi membrane);GO:0001516(prostaglandin biosynthetic process);GO:0004622(lysophospholipase activity);GO:0005524(ATP binding);GO:0005737(cytoplasm);GO:0005777(peroxisome);GO:0005778(peroxisomal membrane);GO:0005783(endoplasmic reticulum);GO:0005789(endoplasmic reticulum membrane);GO:0005794(Golgi apparatus);GO:0006629(lipid metabolic process);GO:0006631(fatty acid metabolic process);GO…	NA	K16815	NA
2	ENSG00000160255	ITGB2	5.95072	4.6981	0.340986	3.48182e-55	1.51229e-50	integrin subunit beta 2 [Source:HGNC Symbol;Acc:HGNC:6155]	GO:0001540(amyloid-beta binding);GO:0001774(microglial cell activation);GO:0001851(complement component C3b binding);GO:0002523(leukocyte migration involved in inflammatory response);GO:0005178(integrin binding);GO:0005515(protein binding);GO:0005886(plasma membrane);GO:0005925(focal adhesion);GO:0006898(receptor-mediated endocytosis);GO:0006909(phagocytosis);GO:0006911(phagocytosis, engulfment);…	04015(Rap1 signaling pathway);04145(Phagosome);04390(Hippo signaling pathway);04514(Cell adhesion molecules (CAMs));04610(Complement and coagulation cascades);04650(Natural killer cell mediated cytotoxicity);04670(Leukocyte transendothelial migration);04810(Regulation of actin cytoskeleton);05133(Pertussis);05134(Legionellosis);05140(Leishmaniasis);05144(Malaria);05146(Amoebiasis);05150(Staphyloc…	K06464	NA
2	ENSG00000175066	GK5	0.76927	0.575548	0.418555	4.00728e-55	1.74052e-50	glycerol kinase 5 [Source:HGNC Symbol;Acc:HGNC:28635]	GO:0000166(nucleotide binding);GO:0004370(glycerol kinase activity);GO:0005524(ATP binding);GO:0005737(cytoplasm);GO:0005739(mitochondrion);GO:0005975(carbohydrate metabolic process);GO:0006071(glycerol metabolic process);GO:0006641(triglyceride metabolic process);GO:0016301(kinase activity);GO:0016310(phosphorylation);GO:0016740(transferase activity);GO:0016773(phosphotransferase activity, alcoh…	NA	K19583	EC:2.7.1.30
2	ENSG00000090376	IRAK3	2.01427	1.48189	0.442821	4.72318e-55	2.05146e-50	interleukin 1 receptor associated kinase 3 [Source:HGNC Symbol;Acc:HGNC:17020]	GO:0000166(nucleotide binding);GO:0000287(magnesium ion binding);GO:0001960(negative regulation of cytokine-mediated signaling pathway);GO:0002755(MyD88-dependent toll-like receptor signaling pathway);GO:0004672(protein kinase activity);GO:0004674(protein serine/threonine kinase activity);GO:0005515(protein binding);GO:0005524(ATP binding);GO:0005634(nucleus);GO:0005737(cytoplasm);GO:0005886(plas…	04722(Neurotrophin signaling pathway)	K04732	EC:2.7.11.1
2	ENSG00000259379	MTND5P32	0.951465	0.679756	0.485133	6.86231e-55	2.98058e-50	MT-ND5 pseudogene 32 [Source:HGNC Symbol;Acc:HGNC:51951]	NA	NA	NA	NA
2	ENSG00000106066	CPVL	2.08279	1.52825	0.446637	9.18269e-55	3.98841e-50	carboxypeptidase, vitellogenic like [Source:HGNC Symbol;Acc:HGNC:14399]	GO:0004180(carboxypeptidase activity);GO:0004185(serine-type carboxypeptidase activity);GO:0006508(proteolysis);GO:0008233(peptidase activity);GO:0016787(hydrolase activity);GO:0051603(proteolysis involved in cellular protein catabolic process);GO:0070062(extracellular exosome)	NA	K09645	EC:3.4.16.-
2	ENSG00000172216	CEBPB	8.1647	6.42424	0.345874	4.48223e-54	1.94681e-49	CCAAT enhancer binding protein beta [Source:HGNC Symbol;Acc:HGNC:1834]	GO:0000122(negative regulation of transcription by RNA polymerase II);GO:0000779(condensed chromosome, centromeric region);GO:0000790(nuclear chromatin);GO:0000977(RNA polymerase II regulatory region sequence-specific DNA binding);GO:0000978(RNA polymerase II proximal promoter sequence-specific DNA binding);GO:0000979(RNA polymerase II core promoter sequence-specific DNA binding);GO:0000981(DNA-b…	04657(IL-17 signaling pathway);04668(TNF signaling pathway);05152(Tuberculosis);05202(Transcriptional misregulation in cancer)	NA	NA
2	ENSG00000101596	SMCHD1	1.98391	1.47845	0.424269	4.6924e-54	2.0381e-49	structural maintenance of chromosomes flexible hinge domain containing 1 [Source:HGNC Symbol;Acc:HGNC:29090]	GO:0000784(nuclear chromosome, telomeric region);GO:0001740(Barr body);GO:0003677(DNA binding);GO:0005515(protein binding);GO:0005524(ATP binding);GO:0005694(chromosome);GO:0006281(DNA repair);GO:0006302(double-strand break repair);GO:0006325(chromatin organization);GO:0006974(cellular response to DNA damage stimulus);GO:0009048(dosage compensation by inactivation of X chromosome);GO:0016787(hydr…	NA	K23113	NA
2	ENSG00000135269	TES	1.1519	0.860031	0.421561	5.05159e-54	2.19411e-49	testin LIM domain protein [Source:HGNC Symbol;Acc:HGNC:14620]	GO:0003723(RNA binding);GO:0005515(protein binding);GO:0005634(nucleus);GO:0005737(cytoplasm);GO:0005829(cytosol);GO:0005886(plasma membrane);GO:0005925(focal adhesion);GO:0008270(zinc ion binding);GO:0008285(negative regulation of cell population proliferation);GO:0030054(cell junction);GO:0032991(protein-containing complex);GO:0042127(regulation of cell population proliferation);GO:0045296(cadh…	NA	NA	NA
2	ENSG00000116260	QSOX1	1.42246	1.07438	0.40488	9.32279e-54	4.04926e-49	quiescin sulfhydryl oxidase 1 [Source:HGNC Symbol;Acc:HGNC:9756]	GO:0000139(Golgi membrane);GO:0002576(platelet degranulation);GO:0003756(protein disulfide isomerase activity);GO:0005576(extracellular region);GO:0005615(extracellular space);GO:0005623(cell);GO:0005788(endoplasmic reticulum lumen);GO:0005794(Golgi apparatus);GO:0016020(membrane);GO:0016021(integral component of membrane);GO:0016242(negative regulation of macroautophagy);GO:0016491(oxidoreductas…	NA	NA	NA
2	ENSG00000102007	PLP2	1.95242	1.49346	0.386605	3.20676e-53	1.39283e-48	proteolipid protein 2 [Source:HGNC Symbol;Acc:HGNC:9087]	GO:0005515(protein binding);GO:0005783(endoplasmic reticulum);GO:0005789(endoplasmic reticulum membrane);GO:0005886(plasma membrane);GO:0006811(ion transport);GO:0006935(chemotaxis);GO:0015075(ion transmembrane transporter activity);GO:0016020(membrane);GO:0016021(integral component of membrane);GO:0019221(cytokine-mediated signaling pathway);GO:0019956(chemokine binding);GO:0034220(ion transmemb…	NA	NA	NA
2	ENSG00000159840	ZYX	2.77267	2.18185	0.345725	9.61997e-53	4.17834e-48	zyxin [Source:HGNC Symbol;Acc:HGNC:13200]	GO:0001725(stress fiber);GO:0003723(RNA binding);GO:0005515(protein binding);GO:0005634(nucleus);GO:0005737(cytoplasm);GO:0005829(cytosol);GO:0005856(cytoskeleton);GO:0005913(cell-cell adherens junction);GO:0005925(focal adhesion);GO:0007155(cell adhesion);GO:0007160(cell-matrix adhesion);GO:0007179(transforming growth factor beta receptor signaling pathway);GO:0007229(integrin-mediated signaling…	04510(Focal adhesion)	K06273	NA
2	ENSG00000131370	SH3BP5	2.02972	1.5315	0.406334	1.24232e-52	5.39587e-48	SH3 domain binding protein 5 [Source:HGNC Symbol;Acc:HGNC:10827]	GO:0004860(protein kinase inhibitor activity);GO:0005085(guanyl-nucleotide exchange factor activity);GO:0005515(protein binding);GO:0005654(nucleoplasm);GO:0005737(cytoplasm);GO:0005739(mitochondrion);GO:0006469(negative regulation of protein kinase activity);GO:0007165(signal transduction);GO:0016020(membrane);GO:0016604(nuclear body);GO:0017112(Rab guanyl-nucleotide exchange factor activity);GO…	NA	NA	NA
2	ENSG00000103569	AQP9	3.20784	2.40198	0.417382	1.58186e-52	6.87067e-48	aquaporin 9 [Source:HGNC Symbol;Acc:HGNC:643]	GO:0005275(amine transmembrane transporter activity);GO:0005345(purine nucleobase transmembrane transporter activity);GO:0005350(pyrimidine nucleobase transmembrane transporter activity);GO:0005372(water transmembrane transporter activity);GO:0005886(plasma membrane);GO:0005887(integral component of plasma membrane);GO:0006833(water transport);GO:0006863(purine nucleobase transport);GO:0006955(im…	04976(Bile secretion)	NA	NA
2	ENSG00000081320	STK17B	2.80991	2.14444	0.389927	1.61579e-52	7.01803e-48	serine/threonine kinase 17b [Source:HGNC Symbol;Acc:HGNC:11396]	GO:0000166(nucleotide binding);GO:0004672(protein kinase activity);GO:0004674(protein serine/threonine kinase activity);GO:0005524(ATP binding);GO:0005634(nucleus);GO:0005793(endoplasmic reticulum-Golgi intermediate compartment);GO:0005886(plasma membrane);GO:0006468(protein phosphorylation);GO:0006915(apoptotic process);GO:0012501(programmed cell death);GO:0015629(actin cytoskeleton);GO:0016020(…	NA	K08804	EC:2.7.11.1
2	ENSG00000133246	PRAM1	0.523439	0.408484	0.357741	2.87913e-52	1.25052e-47	PML-RARA regulated adaptor molecule 1 [Source:HGNC Symbol;Acc:HGNC:30091]	GO:0005515(protein binding);GO:0005886(plasma membrane);GO:0007229(integrin-mediated signaling pathway);GO:0008289(lipid binding);GO:0019901(protein kinase binding);GO:0032991(protein-containing complex);GO:0043313(regulation of neutrophil degranulation);GO:0050852(T cell receptor signaling pathway);GO:0072659(protein localization to plasma membrane)	NA	K19994	NA
2	ENSG00000185862	EVI2B	2.66576	1.98763	0.423493	3.23729e-52	1.40609e-47	ecotropic viral integration site 2B [Source:HGNC Symbol;Acc:HGNC:3500]	GO:0005887(integral component of plasma membrane);GO:0016020(membrane);GO:0016021(integral component of membrane);GO:0030854(positive regulation of granulocyte differentiation);GO:0043066(negative regulation of apoptotic process);GO:0045660(positive regulation of neutrophil differentiation);GO:0061515(myeloid cell development);GO:0071157(negative regulation of cell cycle arrest);GO:2000035(regula…	NA	K16854	NA
2	ENSG00000113811	SELENOK	1.96616	1.52578	0.365833	4.23149e-52	1.83791e-47	selenoprotein K [Source:HGNC Symbol;Acc:HGNC:30394]	GO:0002230(positive regulation of defense response to virus by host);GO:0005515(protein binding);GO:0005783(endoplasmic reticulum);GO:0005789(endoplasmic reticulum membrane);GO:0005794(Golgi apparatus);GO:0005886(plasma membrane);GO:0006811(ion transport);GO:0006816(calcium ion transport);GO:0006979(response to oxidative stress);GO:0010742(macrophage derived foam cell differentiation);GO:0016020(…	NA	NA	NA
2	ENSG00000116679	IVNS1ABP	1.97435	1.50186	0.394625	5.1958e-52	2.25674e-47	influenza virus NS1A binding protein [Source:HGNC Symbol;Acc:HGNC:16951]	GO:0005515(protein binding);GO:0005634(nucleus);GO:0005654(nucleoplasm);GO:0005667(transcription factor complex);GO:0005681(spliceosomal complex);GO:0005737(cytoplasm);GO:0005829(cytosol);GO:0005856(cytoskeleton);GO:0006383(transcription by RNA polymerase III);GO:0008380(RNA splicing);GO:0009615(response to virus);GO:0015629(actin cytoskeleton);GO:0016032(viral process);GO:0031397(negative regula…	05164(Influenza A)	K15046	NA
2	ENSG00000121807	CCR2	0.496566	0.385879	0.363838	7.61707e-52	3.3084e-47	C-C motif chemokine receptor 2 [Source:HGNC Symbol;Acc:HGNC:1603]	GO:0001974(blood vessel remodeling);GO:0002407(dendritic cell chemotaxis);GO:0002548(monocyte chemotaxis);GO:0002724(regulation of T cell cytokine production);GO:0002827(positive regulation of T-helper 1 type immune response);GO:0002829(negative regulation of type 2 immune response);GO:0004930(G protein-coupled receptor activity);GO:0004950(chemokine receptor activity);GO:0005515(protein binding)…	04060(Cytokine-cytokine receptor interaction);04062(Chemokine signaling pathway)	K04177	NA
2	ENSG00000123983	ACSL3	2.64235	2.01045	0.394301	1.64496e-51	7.14474e-47	acyl-CoA synthetase long chain family member 3 [Source:HGNC Symbol;Acc:HGNC:3570]	GO:0000166(nucleotide binding);GO:0001676(long-chain fatty acid metabolic process);GO:0003824(catalytic activity);GO:0004467(long-chain fatty acid-CoA ligase activity);GO:0005524(ATP binding);GO:0005739(mitochondrion);GO:0005741(mitochondrial outer membrane);GO:0005777(peroxisome);GO:0005778(peroxisomal membrane);GO:0005783(endoplasmic reticulum);GO:0005789(endoplasmic reticulum membrane);GO:0005…	00061(Fatty acid biosynthesis);00071(Fatty acid degradation);03320(PPAR signaling pathway);04146(Peroxisome);04216(Ferroptosis);04714(Thermogenesis);04920(Adipocytokine signaling pathway)	K01897	EC:6.2.1.3
2	ENSG00000136040	PLXNC1	1.11599	0.837794	0.41366	5.00617e-50	2.17438e-45	plexin C1 [Source:HGNC Symbol;Acc:HGNC:9106]	GO:0002116(semaphorin receptor complex);GO:0005102(signaling receptor binding);GO:0005515(protein binding);GO:0005886(plasma membrane);GO:0005887(integral component of plasma membrane);GO:0007155(cell adhesion);GO:0007162(negative regulation of cell adhesion);GO:0007165(signal transduction);GO:0008360(regulation of cell shape);GO:0016020(membrane);GO:0016021(integral component of membrane);GO:001…	04360(Axon guidance)	K06572	NA
2	ENSG00000162244	RPL29	17.7555	14.5141	0.290812	5.19257e-50	2.25534e-45	ribosomal protein L29 [Source:HGNC Symbol;Acc:HGNC:10331]	GO:0000184(nuclear-transcribed mRNA catabolic process, nonsense-mediated decay);GO:0002181(cytoplasmic translation);GO:0003723(RNA binding);GO:0003735(structural constituent of ribosome);GO:0005622(intracellular);GO:0005829(cytosol);GO:0005840(ribosome);GO:0006412(translation);GO:0006413(translational initiation);GO:0006614(SRP-dependent cotranslational protein targeting to membrane);GO:0007566(e…	03010(Ribosome)	K02905	NA
2	ENSG00000063177	RPL18	17.0965	14.1206	0.275902	5.3112e-50	2.30687e-45	ribosomal protein L18 [Source:HGNC Symbol;Acc:HGNC:10310]	GO:0000184(nuclear-transcribed mRNA catabolic process, nonsense-mediated decay);GO:0002181(cytoplasmic translation);GO:0003723(RNA binding);GO:0003735(structural constituent of ribosome);GO:0005622(intracellular);GO:0005634(nucleus);GO:0005730(nucleolus);GO:0005737(cytoplasm);GO:0005783(endoplasmic reticulum);GO:0005791(rough endoplasmic reticulum);GO:0005829(cytosol);GO:0005840(ribosome);GO:0005…	03010(Ribosome)	K02883	NA
2	ENSG00000025708	TYMP	9.92298	8.27073	0.262758	7.78148e-50	3.37981e-45	thymidine phosphorylase [Source:HGNC Symbol;Acc:HGNC:3148]	GO:0000002(mitochondrial genome maintenance);GO:0001525(angiogenesis);GO:0004645(phosphorylase activity);GO:0005829(cytosol);GO:0006206(pyrimidine nucleobase metabolic process);GO:0006213(pyrimidine nucleoside metabolic process);GO:0006935(chemotaxis);GO:0007275(multicellular organism development);GO:0008083(growth factor activity);GO:0009032(thymidine phosphorylase activity);GO:0010469(regulatio…	00240(Pyrimidine metabolism);00983(Drug metabolism - other enzymes);05219(Bladder cancer)	K00758	EC:2.4.2.4
2	ENSG00000197632	SERPINB2	1.84737	1.32345	0.481166	9.31013e-50	4.04376e-45	serpin family B member 2 [Source:HGNC Symbol;Acc:HGNC:8584]	GO:0004867(serine-type endopeptidase inhibitor activity);GO:0005576(extracellular region);GO:0005615(extracellular space);GO:0005737(cytoplasm);GO:0005886(plasma membrane);GO:0010466(negative regulation of peptidase activity);GO:0010951(negative regulation of endopeptidase activity);GO:0030414(peptidase inhibitor activity);GO:0035722(interleukin-12-mediated signaling pathway);GO:0042060(wound hea…	04610(Complement and coagulation cascades)	K19821	NA
2	ENSG00000101307	SIRPB1	0.723177	0.563895	0.358922	2.12996e-49	9.25125e-45	signal regulatory protein beta 1 [Source:HGNC Symbol;Acc:HGNC:15928]	GO:0005515(protein binding);GO:0005886(plasma membrane);GO:0005887(integral component of plasma membrane);GO:0007165(signal transduction);GO:0007166(cell surface receptor signaling pathway);GO:0009986(cell surface);GO:0016020(membrane);GO:0016021(integral component of membrane);GO:0022409(positive regulation of cell-cell adhesion);GO:0030667(secretory granule membrane);GO:0043312(neutrophil degra…	04380(Osteoclast differentiation)	K06551	NA
2	ENSG00000143947	RPS27A	17.5994	14.5824	0.271304	2.45376e-49	1.06577e-44	ribosomal protein S27a [Source:HGNC Symbol;Acc:HGNC:10417]	GO:0000122(negative regulation of transcription by RNA polymerase II);GO:0000184(nuclear-transcribed mRNA catabolic process, nonsense-mediated decay);GO:0000187(activation of MAPK activity);GO:0000209(protein polyubiquitination);GO:0000715(nucleotide-excision repair, DNA damage recognition);GO:0000717(nucleotide-excision repair, DNA duplex unwinding);GO:0002755(MyD88-dependent toll-like receptor …	03010(Ribosome)	K02977	NA
2	ENSG00000170345	FOS	22.2549	18.0844	0.299374	3.53957e-49	1.53738e-44	Fos proto-oncogene, AP-1 transcription factor subunit [Source:HGNC Symbol;Acc:HGNC:3796]	GO:0000978(RNA polymerase II proximal promoter sequence-specific DNA binding);GO:0000979(RNA polymerase II core promoter sequence-specific DNA binding);GO:0000981(DNA-binding transcription factor activity, RNA polymerase II-specific);GO:0001102(RNA polymerase II activating transcription factor binding);GO:0001228(DNA-binding transcription activator activity, RNA polymerase II-specific);GO:0001661…	01522(Endocrine resistance);04010(MAPK signaling pathway);04024(cAMP signaling pathway);04210(Apoptosis);04380(Osteoclast differentiation);04620(Toll-like receptor signaling pathway);04657(IL-17 signaling pathway);04658(Th1 and Th2 cell differentiation);04659(Th17 cell differentiation);04660(T cell receptor signaling pathway);04662(B cell receptor signaling pathway);04668(TNF signaling pathway);0…	NA	NA
2	ENSG00000135655	USP15	2.17575	1.66995	0.38171	5.52456e-49	2.39954e-44	ubiquitin specific peptidase 15 [Source:HGNC Symbol;Acc:HGNC:12613]	GO:0003824(catalytic activity);GO:0004197(cysteine-type endopeptidase activity);GO:0004843(thiol-dependent ubiquitin-specific protease activity);GO:0005160(transforming growth factor beta receptor binding);GO:0005515(protein binding);GO:0005634(nucleus);GO:0005737(cytoplasm);GO:0005739(mitochondrion);GO:0005829(cytosol);GO:0006508(proteolysis);GO:0006511(ubiquitin-dependent protein catabolic proc…	04137(Mitophagy - animal)	K21343	EC:3.4.19.12
2	ENSG00000111276	CDKN1B	0.963974	0.730279	0.400547	5.71673e-49	2.483e-44	cyclin dependent kinase inhibitor 1B [Source:HGNC Symbol;Acc:HGNC:1785]	GO:0000079(regulation of cyclin-dependent protein serine/threonine kinase activity);GO:0000082(G1/S transition of mitotic cell cycle);GO:0001666(response to hypoxia);GO:0001890(placenta development);GO:0004860(protein kinase inhibitor activity);GO:0004861(cyclin-dependent protein serine/threonine kinase inhibitor activity);GO:0005072(transforming growth factor beta receptor, cytoplasmic mediator …	01522(Endocrine resistance);04012(ErbB signaling pathway);04066(HIF-1 signaling pathway);04068(FoxO signaling pathway);04110(Cell cycle);04151(PI3K-Akt signaling pathway);04933(AGE-RAGE signaling pathway in diabetic complications);04934(Cushing syndrome);05162(Measles);05165(Human papillomavirus infection);05169(Epstein-Barr virus infection);05200(Pathways in cancer);05202(Transcriptional misregu…	NA	NA
2	ENSG00000075426	FOSL2	2.56053	1.91573	0.41855	7.22959e-49	3.1401e-44	FOS like 2, AP-1 transcription factor subunit [Source:HGNC Symbol;Acc:HGNC:3798]	GO:0000977(RNA polymerase II regulatory region sequence-specific DNA binding);GO:0000978(RNA polymerase II proximal promoter sequence-specific DNA binding);GO:0000981(DNA-binding transcription factor activity, RNA polymerase II-specific);GO:0001228(DNA-binding transcription activator activity, RNA polymerase II-specific);GO:0003334(keratinocyte development);GO:0003677(DNA binding);GO:0003682(chro…	04380(Osteoclast differentiation)	NA	NA
2	ENSG00000142405	NLRP12	0.389614	0.314436	0.30928	2.34201e-48	1.01723e-43	NLR family pyrin domain containing 12 [Source:HGNC Symbol;Acc:HGNC:22938]	GO:0000166(nucleotide binding);GO:0005515(protein binding);GO:0005524(ATP binding);GO:0005737(cytoplasm);GO:0006919(activation of cysteine-type endopeptidase activity involved in apoptotic process);GO:0007165(signal transduction);GO:0008656(cysteine-type endopeptidase activator activity involved in apoptotic process);GO:0009968(negative regulation of signal transduction);GO:0031953(negative regul…	04621(NOD-like receptor signaling pathway)	K20865	NA
2	ENSG00000251230	MIR3945HG	0.843325	0.62158	0.440148	3.35608e-48	1.45768e-43	MIR3945 host gene [Source:HGNC Symbol;Acc:HGNC:52002]	NA	NA	NA	NA
2	ENSG00000109743	BST1	0.78312	0.607843	0.365534	7.91442e-48	3.43755e-43	bone marrow stromal cell antigen 1 [Source:HGNC Symbol;Acc:HGNC:1118]	GO:0001931(uropod);GO:0001952(regulation of cell-matrix adhesion);GO:0002691(regulation of cellular extravasation);GO:0003953(NAD+ nucleosidase activity);GO:0005576(extracellular region);GO:0005886(plasma membrane);GO:0006959(humoral immune response);GO:0007165(signal transduction);GO:0008284(positive regulation of cell population proliferation);GO:0008305(integrin complex);GO:0016020(membrane);G…	00760(Nicotinate and nicotinamide metabolism);04970(Salivary secretion);04972(Pancreatic secretion)	NA	NA
2	ENSG00000171236	LRG1	0.575878	0.441307	0.38398	1.37435e-47	5.96935e-43	leucine rich alpha-2-glycoprotein 1 [Source:HGNC Symbol;Acc:HGNC:29480]	GO:0001938(positive regulation of endothelial cell proliferation);GO:0003674(molecular_function);GO:0005160(transforming growth factor beta receptor binding);GO:0005515(protein binding);GO:0005576(extracellular region);GO:0005615(extracellular space);GO:0008150(biological_process);GO:0009617(response to bacterium);GO:0016020(membrane);GO:0030511(positive regulation of transforming growth factor b…	NA	NA	NA
2	ENSG00000092820	EZR	2.52369	2.01778	0.322767	1.60803e-47	6.98433e-43	ezrin [Source:HGNC Symbol;Acc:HGNC:12691]	GO:0000122(negative regulation of transcription by RNA polymerase II);GO:0001650(fibrillar center);GO:0001726(ruffle);GO:0001772(immunological synapse);GO:0001931(uropod);GO:0001951(intestinal D-glucose absorption);GO:0003376(sphingosine-1-phosphate receptor signaling pathway);GO:0003723(RNA binding);GO:0003779(actin binding);GO:0005515(protein binding);GO:0005615(extracellular space);GO:0005737(…	04530(Tight junction);04670(Leukocyte transendothelial migration);04810(Regulation of actin cytoskeleton);04971(Gastric acid secretion);05130(Pathogenic Escherichia coli infection);05205(Proteoglycans in cancer);05206(MicroRNAs in cancer)	K08007	NA
2	ENSG00000129355	CDKN2D	0.53354	0.420167	0.344635	3.29142e-47	1.42959e-42	cyclin dependent kinase inhibitor 2D [Source:HGNC Symbol;Acc:HGNC:1790]	GO:0000079(regulation of cyclin-dependent protein serine/threonine kinase activity);GO:0000082(G1/S transition of mitotic cell cycle);GO:0000731(DNA synthesis involved in DNA repair);GO:0004861(cyclin-dependent protein serine/threonine kinase inhibitor activity);GO:0005515(protein binding);GO:0005634(nucleus);GO:0005654(nucleoplasm);GO:0005737(cytoplasm);GO:0005829(cytosol);GO:0007049(cell cycle)…	04068(FoxO signaling pathway);04110(Cell cycle)	NA	NA
2	ENSG00000141504	SAT2	1.43234	1.14614	0.32159	3.34648e-47	1.45351e-42	spermidine/spermine N1-acetyltransferase family member 2 [Source:HGNC Symbol;Acc:HGNC:23160]	GO:0004145(diamine N-acetyltransferase activity);GO:0005515(protein binding);GO:0005737(cytoplasm);GO:0008080(N-acetyltransferase activity);GO:0009447(putrescine catabolic process);GO:0016740(transferase activity);GO:0016746(transferase activity, transferring acyl groups);GO:0019809(spermidine binding);GO:0032918(spermidine acetylation);GO:0032919(spermine acetylation);GO:0032920(putrescine acety…	00330(Arginine and proline metabolism);04216(Ferroptosis)	K00657	EC:2.3.1.57
2	ENSG00000196083	IL1RAP	0.74732	0.566689	0.399169	3.66943e-47	1.59378e-42	interleukin 1 receptor accessory protein [Source:HGNC Symbol;Acc:HGNC:5995]	GO:0002114(interleukin-33 receptor activity);GO:0002376(immune system process);GO:0004908(interleukin-1 receptor activity);GO:0005515(protein binding);GO:0005576(extracellular region);GO:0005886(plasma membrane);GO:0005887(integral component of plasma membrane);GO:0006954(inflammatory response);GO:0006955(immune response);GO:0007165(signal transduction);GO:0016020(membrane);GO:0016021(integral co…	04010(MAPK signaling pathway);04060(Cytokine-cytokine receptor interaction);04659(Th17 cell differentiation);04750(Inflammatory mediator regulation of TRP channels)	K04723	NA
2	ENSG00000178719	GRINA	2.38077	1.89139	0.33198	3.92046e-47	1.70281e-42	glutamate ionotropic receptor NMDA type subunit associated protein 1 [Source:HGNC Symbol;Acc:HGNC:4589]	GO:0005783(endoplasmic reticulum);GO:0005794(Golgi apparatus);GO:0016020(membrane);GO:0016021(integral component of membrane);GO:0032469(endoplasmic reticulum calcium ion homeostasis);GO:0044325(ion channel binding);GO:1902236(negative regulation of endoplasmic reticulum stress-induced intrinsic apoptotic signaling pathway)	NA	NA	NA
2	ENSG00000154146	NRGN	0.668887	0.518939	0.366197	5.76404e-47	2.50356e-42	neurogranin [Source:HGNC Symbol;Acc:HGNC:8000]	GO:0005515(protein binding);GO:0005516(calmodulin binding);GO:0005547(phosphatidylinositol-3,4,5-trisphosphate binding);GO:0005634(nucleus);GO:0005737(cytoplasm);GO:0005829(cytosol);GO:0007165(signal transduction);GO:0007399(nervous system development);GO:0008306(associative learning);GO:0012510(trans-Golgi network transport vesicle membrane);GO:0014069(postsynaptic density);GO:0016301(kinase act…	NA	NA	NA
2	ENSG00000115956	PLEK	5.11853	4.10198	0.319411	1.42182e-46	6.17553e-42	pleckstrin [Source:HGNC Symbol;Acc:HGNC:9070]	GO:0002244(hematopoietic progenitor cell differentiation);GO:0002576(platelet degranulation);GO:0005080(protein kinase C binding);GO:0005515(protein binding);GO:0005576(extracellular region);GO:0005737(cytoplasm);GO:0005829(cytosol);GO:0005886(plasma membrane);GO:0006904(vesicle docking involved in exocytosis);GO:0007229(integrin-mediated signaling pathway);GO:0010572(positive regulation of plate…	NA	K19993	NA
2	ENSG00000089195	TRMT6	0.872839	0.670577	0.380311	1.52455e-46	6.62175e-42	tRNA methyltransferase 6 [Source:HGNC Symbol;Acc:HGNC:20900]	GO:0003723(RNA binding);GO:0005634(nucleus);GO:0005654(nucleoplasm);GO:0006400(tRNA modification);GO:0008033(tRNA processing);GO:0016429(tRNA (adenine-N1-)-methyltransferase activity);GO:0030488(tRNA methylation);GO:0031515(tRNA (m1A) methyltransferase complex);GO:0080009(mRNA methylation)	NA	K03256	NA
2	ENSG00000140749	IGSF6	1.77717	1.3177	0.431555	1.84774e-46	8.02549e-42	immunoglobulin superfamily member 6 [Source:HGNC Symbol;Acc:HGNC:5953]	GO:0004888(transmembrane signaling receptor activity);GO:0005887(integral component of plasma membrane);GO:0006955(immune response);GO:0007166(cell surface receptor signaling pathway);GO:0016020(membrane);GO:0016021(integral component of membrane)	NA	NA	NA
2	ENSG00000172243	CLEC7A	2.56984	1.98275	0.374177	1.95972e-46	8.51186e-42	C-type lectin domain containing 7A [Source:HGNC Symbol;Acc:HGNC:14558]	GO:0002221(pattern recognition receptor signaling pathway);GO:0002376(immune system process);GO:0005515(protein binding);GO:0005654(nucleoplasm);GO:0005737(cytoplasm);GO:0005886(plasma membrane);GO:0006910(phagocytosis, recognition);GO:0006954(inflammatory response);GO:0008037(cell recognition);GO:0008329(signaling pattern recognition receptor activity);GO:0009756(carbohydrate mediated signaling)…	04145(Phagosome);04625(C-type lectin receptor signaling pathway);05152(Tuberculosis)	K10074	NA
2	ENSG00000196683	TOMM7	2.9862	2.37071	0.332993	3.51038e-46	1.5247e-41	translocase of outer mitochondrial membrane 7 [Source:HGNC Symbol;Acc:HGNC:21648]	GO:0005515(protein binding);GO:0005739(mitochondrion);GO:0005741(mitochondrial outer membrane);GO:0005742(mitochondrial outer membrane translocase complex);GO:0006626(protein targeting to mitochondrion);GO:0008320(protein transmembrane transporter activity);GO:0015031(protein transport);GO:0016020(membrane);GO:0016021(integral component of membrane);GO:0016236(macroautophagy);GO:0030150(protein i…	04137(Mitophagy - animal)	K17771	NA
2	ENSG00000104419	NDRG1	1.05594	0.807189	0.387553	3.53875e-46	1.53702e-41	N-myc downstream regulated 1 [Source:HGNC Symbol;Acc:HGNC:7679]	GO:0005515(protein binding);GO:0005634(nucleus);GO:0005737(cytoplasm);GO:0005813(centrosome);GO:0005815(microtubule organizing center);GO:0005829(cytosol);GO:0005856(cytoskeleton);GO:0005874(microtubule);GO:0005886(plasma membrane);GO:0005913(cell-cell adherens junction);GO:0007165(signal transduction);GO:0008017(microtubule binding);GO:0008285(negative regulation of cell population proliferation…	NA	K18266	NA
2	ENSG00000146278	PNRC1	7.32818	5.8713	0.319776	3.78455e-46	1.64378e-41	proline rich nuclear receptor coactivator 1 [Source:HGNC Symbol;Acc:HGNC:17278]	GO:0005515(protein binding);GO:0005634(nucleus)	NA	K18774	NA
2	ENSG00000108582	CPD	1.25406	0.946137	0.406481	4.54583e-46	1.97443e-41	carboxypeptidase D [Source:HGNC Symbol;Acc:HGNC:2301]	GO:0004180(carboxypeptidase activity);GO:0004181(metallocarboxypeptidase activity);GO:0004185(serine-type carboxypeptidase activity);GO:0005615(extracellular space);GO:0005886(plasma membrane);GO:0006508(proteolysis);GO:0006518(peptide metabolic process);GO:0008233(peptidase activity);GO:0008237(metallopeptidase activity);GO:0008270(zinc ion binding);GO:0016020(membrane);GO:0016021(integral compo…	NA	NA	NA
2	ENSG00000186431	FCAR	0.644255	0.491284	0.391074	4.57905e-46	1.98886e-41	Fc fragment of IgA receptor [Source:HGNC Symbol;Acc:HGNC:3608]	GO:0005576(extracellular region);GO:0005886(plasma membrane);GO:0005887(integral component of plasma membrane);GO:0006955(immune response);GO:0016020(membrane);GO:0016021(integral component of membrane);GO:0019862(IgA binding);GO:0035579(specific granule membrane);GO:0043312(neutrophil degranulation);GO:0070821(tertiary granule membrane);GO:0101003(ficolin-1-rich granule membrane)	04145(Phagosome);05150(Staphylococcus aureus infection)	NA	NA
2	ENSG00000198736	MSRB1	0.520096	0.416131	0.321741	8.41066e-46	3.65309e-41	methionine sulfoxide reductase B1 [Source:HGNC Symbol;Acc:HGNC:14133]	GO:0002376(immune system process);GO:0003779(actin binding);GO:0005575(cellular_component);GO:0005634(nucleus);GO:0005654(nucleoplasm);GO:0005737(cytoplasm);GO:0005829(cytosol);GO:0005856(cytoskeleton);GO:0006979(response to oxidative stress);GO:0008270(zinc ion binding);GO:0015629(actin cytoskeleton);GO:0016491(oxidoreductase activity);GO:0016671(oxidoreductase activity, acting on a sulfur group…	NA	K07305	EC:1.8.4.12
2	ENSG00000198900	TOP1	3.15931	2.496	0.339991	1.08558e-45	4.7151e-41	DNA topoisomerase I [Source:HGNC Symbol;Acc:HGNC:11986]	GO:0000228(nuclear chromosome);GO:0000932(P-body);GO:0000978(RNA polymerase II proximal promoter sequence-specific DNA binding);GO:0001650(fibrillar center);GO:0003677(DNA binding);GO:0003682(chromatin binding);GO:0003690(double-stranded DNA binding);GO:0003697(single-stranded DNA binding);GO:0003723(RNA binding);GO:0003916(DNA topoisomerase activity);GO:0003917(DNA topoisomerase type I activity)…	NA	K03163	EC:5.6.2.1
2	ENSG00000153395	LPCAT1	1.254	0.937304	0.419949	1.14751e-45	4.98411e-41	lysophosphatidylcholine acyltransferase 1 [Source:HGNC Symbol;Acc:HGNC:25718]	GO:0000139(Golgi membrane);GO:0005509(calcium ion binding);GO:0005783(endoplasmic reticulum);GO:0005789(endoplasmic reticulum membrane);GO:0005794(Golgi apparatus);GO:0005811(lipid droplet);GO:0005886(plasma membrane);GO:0006629(lipid metabolic process);GO:0006644(phospholipid metabolic process);GO:0006654(phosphatidic acid biosynthetic process);GO:0006656(phosphatidylcholine biosynthetic process…	00564(Glycerophospholipid metabolism);00565(Ether lipid metabolism)	K13510	2.3.1.67;EC:2.3.1.23
2	ENSG00000169896	ITGAM	1.62946	1.26366	0.366788	3.04271e-45	1.32157e-40	integrin subunit alpha M [Source:HGNC Symbol;Acc:HGNC:6149]	GO:0001540(amyloid-beta binding);GO:0001774(microglial cell activation);GO:0001851(complement component C3b binding);GO:0002376(immune system process);GO:0005515(protein binding);GO:0005615(extracellular space);GO:0005886(plasma membrane);GO:0006898(receptor-mediated endocytosis);GO:0006911(phagocytosis, engulfment);GO:0007155(cell adhesion);GO:0007229(integrin-mediated signaling pathway);GO:0008…	04015(Rap1 signaling pathway);04145(Phagosome);04514(Cell adhesion molecules (CAMs));04610(Complement and coagulation cascades);04640(Hematopoietic cell lineage);04670(Leukocyte transendothelial migration);04810(Regulation of actin cytoskeleton);05133(Pertussis);05134(Legionellosis);05140(Leishmaniasis);05146(Amoebiasis);05150(Staphylococcus aureus infection);05152(Tuberculosis);05202(Transcripti…	K06461	NA
2	ENSG00000123610	TNFAIP6	1.39941	0.994447	0.492854	3.59133e-45	1.55986e-40	TNF alpha induced protein 6 [Source:HGNC Symbol;Acc:HGNC:11898]	GO:0005515(protein binding);GO:0005540(hyaluronic acid binding);GO:0005576(extracellular region);GO:0005615(extracellular space);GO:0006954(inflammatory response);GO:0007155(cell adhesion);GO:0007165(signal transduction);GO:0007267(cell-cell signaling);GO:0030335(positive regulation of cell migration);GO:0030728(ovulation);GO:0043312(neutrophil degranulation);GO:0050728(negative regulation of inf…	NA	K19018	NA
2	ENSG00000124216	SNAI1	0.431247	0.348299	0.308187	3.59959e-45	1.56345e-40	snail family transcriptional repressor 1 [Source:HGNC Symbol;Acc:HGNC:11128]	GO:0000122(negative regulation of transcription by RNA polymerase II);GO:0000977(RNA polymerase II regulatory region sequence-specific DNA binding);GO:0000981(DNA-binding transcription factor activity, RNA polymerase II-specific);GO:0001227(DNA-binding transcription repressor activity, RNA polymerase II-specific);GO:0001649(osteoblast differentiation);GO:0001707(mesoderm formation);GO:0001837(epi…	04520(Adherens junction)	K05707	NA
2	ENSG00000107372	ZFAND5	5.59177	4.48642	0.317741	6.55351e-45	2.84645e-40	zinc finger AN1-type containing 5 [Source:HGNC Symbol;Acc:HGNC:13008]	GO:0003674(molecular_function);GO:0003677(DNA binding);GO:0005515(protein binding);GO:0005575(cellular_component);GO:0005737(cytoplasm);GO:0008150(biological_process);GO:0008270(zinc ion binding);GO:0046872(metal ion binding)	NA	NA	NA
2	ENSG00000145425	RPS3A	11.7517	9.59609	0.292356	9.26375e-45	4.02362e-40	ribosomal protein S3A [Source:HGNC Symbol;Acc:HGNC:10421]	GO:0000184(nuclear-transcribed mRNA catabolic process, nonsense-mediated decay);GO:0003723(RNA binding);GO:0003735(structural constituent of ribosome);GO:0005515(protein binding);GO:0005622(intracellular);GO:0005634(nucleus);GO:0005654(nucleoplasm);GO:0005730(nucleolus);GO:0005737(cytoplasm);GO:0005783(endoplasmic reticulum);GO:0005829(cytosol);GO:0005840(ribosome);GO:0005925(focal adhesion);GO:0…	03010(Ribosome)	K02984	NA
2	ENSG00000104763	ASAH1	4.50164	3.53122	0.350285	1.41108e-44	6.12889e-40	N-acylsphingosine amidohydrolase 1 [Source:HGNC Symbol;Acc:HGNC:735]	GO:0005576(extracellular region);GO:0005615(extracellular space);GO:0005634(nucleus);GO:0005737(cytoplasm);GO:0005764(lysosome);GO:0006629(lipid metabolic process);GO:0006665(sphingolipid metabolic process);GO:0006687(glycosphingolipid metabolic process);GO:0016020(membrane);GO:0016021(integral component of membrane);GO:0016787(hydrolase activity);GO:0016810(hydrolase activity, acting on carbon-n…	00600(Sphingolipid metabolism);04071(Sphingolipid signaling pathway);04142(Lysosome)	NA	NA
2	ENSG00000147894	C9orf72	1.64603	1.27162	0.372321	1.73336e-44	7.52868e-40	chromosome 9 open reading frame 72 [Source:HGNC Symbol;Acc:HGNC:28337]	GO:0000932(P-body);GO:0001933(negative regulation of protein phosphorylation);GO:0005085(guanyl-nucleotide exchange factor activity);GO:0005515(protein binding);GO:0005576(extracellular region);GO:0005615(extracellular space);GO:0005634(nucleus);GO:0005737(cytoplasm);GO:0005764(lysosome);GO:0005768(endosome);GO:0005776(autophagosome);GO:0006897(endocytosis);GO:0006914(autophagy);GO:0010494(cytopl…	NA	NA	NA
2	ENSG00000165071	TMEM71	0.399983	0.322698	0.309758	2.1108e-44	9.16806e-40	transmembrane protein 71 [Source:HGNC Symbol;Acc:HGNC:26572]	GO:0005739(mitochondrion);GO:0016020(membrane);GO:0016021(integral component of membrane)	NA	NA	NA
2	ENSG00000172936	MYD88	0.963564	0.757957	0.346264	2.11122e-44	9.16987e-40	MYD88, innate immune signal transduction adaptor [Source:HGNC Symbol;Acc:HGNC:7562]	GO:0002224(toll-like receptor signaling pathway);GO:0002238(response to molecule of fungal origin);GO:0002376(immune system process);GO:0002755(MyD88-dependent toll-like receptor signaling pathway);GO:0005102(signaling receptor binding);GO:0005121(Toll binding);GO:0005123(death receptor binding);GO:0005149(interleukin-1 receptor binding);GO:0005515(protein binding);GO:0005634(nucleus);GO:0005737(…	04010(MAPK signaling pathway);04064(NF-kappa B signaling pathway);04620(Toll-like receptor signaling pathway);04621(NOD-like receptor signaling pathway);05132(Salmonella infection);05133(Pertussis);05134(Legionellosis);05140(Leishmaniasis);05142(Chagas disease (American trypanosomiasis));05143(African trypanosomiasis);05144(Malaria);05145(Toxoplasmosis);05152(Tuberculosis);05161(Hepatitis B);0516…	K04729	NA
2	ENSG00000100129	EIF3L	1.35898	1.08909	0.319394	3.66749e-44	1.59294e-39	eukaryotic translation initiation factor 3 subunit L [Source:HGNC Symbol;Acc:HGNC:18138]	GO:0001650(fibrillar center);GO:0001732(formation of cytoplasmic translation initiation complex);GO:0002183(cytoplasmic translational initiation);GO:0003723(RNA binding);GO:0003743(translation initiation factor activity);GO:0005515(protein binding);GO:0005654(nucleoplasm);GO:0005730(nucleolus);GO:0005737(cytoplasm);GO:0005829(cytosol);GO:0005852(eukaryotic translation initiation factor 3 complex)…	NA	K15029	NA
2	ENSG00000160410	SHKBP1	1.25794	0.994752	0.338649	1.80479e-43	7.83892e-39	SH3KBP1 binding protein 1 [Source:HGNC Symbol;Acc:HGNC:19214]	GO:0005515(protein binding);GO:0005764(lysosome);GO:0045742(positive regulation of epidermal growth factor receptor signaling pathway);GO:0051260(protein homooligomerization)	NA	K21953	NA
2	ENSG00000112096	SOD2	12.7724	9.99857	0.353237	1.96826e-43	8.54893e-39	superoxide dismutase 2 [Source:HGNC Symbol;Acc:HGNC:11180]	GO:0000303(response to superoxide);GO:0001315(age-dependent response to reactive oxygen species);GO:0001836(release of cytochrome c from mitochondria);GO:0003069(acetylcholine-mediated vasodilation involved in regulation of systemic arterial blood pressure);GO:0004784(superoxide dismutase activity);GO:0005739(mitochondrion);GO:0005759(mitochondrial matrix);GO:0006357(regulation of transcription b…	04068(FoxO signaling pathway);04146(Peroxisome);04211(Longevity regulating pathway);04213(Longevity regulating pathway - multiple species);05016(Huntington disease)	K04564	EC:1.15.1.1
2	ENSG00000217555	CKLF	1.40871	1.08431	0.377596	8.56414e-43	3.71975e-38	chemokine like factor [Source:HGNC Symbol;Acc:HGNC:13253]	GO:0005125(cytokine activity);GO:0005576(extracellular region);GO:0005615(extracellular space);GO:0006935(chemotaxis);GO:0008009(chemokine activity);GO:0008283(cell population proliferation);GO:0010469(regulation of signaling receptor activity);GO:0016020(membrane);GO:0016021(integral component of membrane);GO:0030593(neutrophil chemotaxis);GO:0030595(leukocyte chemotaxis);GO:0032940(secretion by…	NA	NA	NA
2	ENSG00000198734	F5	0.347926	0.28531	0.286251	8.58594e-43	3.72922e-38	coagulation factor V [Source:HGNC Symbol;Acc:HGNC:3542]	GO:0000139(Golgi membrane);GO:0002576(platelet degranulation);GO:0005507(copper ion binding);GO:0005515(protein binding);GO:0005576(extracellular region);GO:0005615(extracellular space);GO:0005788(endoplasmic reticulum lumen);GO:0005886(plasma membrane);GO:0006888(endoplasmic reticulum to Golgi vesicle-mediated transport);GO:0007596(blood coagulation);GO:0007599(hemostasis);GO:0008015(blood circu…	04610(Complement and coagulation cascades)	K03902	NA
2	ENSG00000143669	LYST	0.913688	0.712259	0.3593	9.34073e-43	4.05705e-38	lysosomal trafficking regulator [Source:HGNC Symbol;Acc:HGNC:1968]	GO:0005515(protein binding);GO:0005737(cytoplasm);GO:0007040(lysosome organization);GO:0015031(protein transport);GO:0015630(microtubule cytoskeleton);GO:0030595(leukocyte chemotaxis);GO:0032438(melanosome organization);GO:0032510(endosome to lysosome transport via multivesicular body sorting pathway);GO:0033364(mast cell secretory granule organization);GO:0042267(natural killer cell mediated cyt…	NA	NA	NA
2	ENSG00000147403	RPL10	30.5812	25.3754	0.269214	1.19172e-42	5.17613e-38	ribosomal protein L10 [Source:HGNC Symbol;Acc:HGNC:10298]	GO:0000027(ribosomal large subunit assembly);GO:0000122(negative regulation of transcription by RNA polymerase II);GO:0000184(nuclear-transcribed mRNA catabolic process, nonsense-mediated decay);GO:0003723(RNA binding);GO:0003735(structural constituent of ribosome);GO:0005515(protein binding);GO:0005622(intracellular);GO:0005634(nucleus);GO:0005783(endoplasmic reticulum);GO:0005790(smooth endopla…	03010(Ribosome)	K02866	NA
2	ENSG00000104974	LILRA1	0.410238	0.332586	0.302735	3.77571e-42	1.63994e-37	leukocyte immunoglobulin like receptor A1 [Source:HGNC Symbol;Acc:HGNC:6602]	GO:0002250(adaptive immune response);GO:0002376(immune system process);GO:0003823(antigen binding);GO:0004888(transmembrane signaling receptor activity);GO:0005886(plasma membrane);GO:0006952(defense response);GO:0007166(cell surface receptor signaling pathway);GO:0016020(membrane);GO:0016021(integral component of membrane);GO:0050776(regulation of immune response)	04380(Osteoclast differentiation)	K06512	NA
2	ENSG00000213694	S1PR3	0.467624	0.370403	0.336255	4.63187e-42	2.01181e-37	sphingosine-1-phosphate receptor 3 [Source:HGNC Symbol;Acc:HGNC:3167]	GO:0001816(cytokine production);GO:0003376(sphingosine-1-phosphate receptor signaling pathway);GO:0004930(G protein-coupled receptor activity);GO:0005178(integrin binding);GO:0005515(protein binding);GO:0005576(extracellular region);GO:0005886(plasma membrane);GO:0005887(integral component of plasma membrane);GO:0006954(inflammatory response);GO:0007165(signal transduction);GO:0007186(G protein-c…	04071(Sphingolipid signaling pathway);04080(Neuroactive ligand-receptor interaction)	K04290	NA
2	ENSG00000118680	MYL12B	4.46559	3.69369	0.273789	7.08986e-42	3.07941e-37	myosin light chain 12B [Source:HGNC Symbol;Acc:HGNC:29827]	GO:0005509(calcium ion binding);GO:0005515(protein binding);GO:0005829(cytosol);GO:0006936(muscle contraction);GO:0016459(myosin complex);GO:0046872(metal ion binding);GO:0070062(extracellular exosome);GO:0099738(cell cortex region)	04360(Axon guidance);04510(Focal adhesion);04530(Tight junction);04611(Platelet activation);04670(Leukocyte transendothelial migration);04810(Regulation of actin cytoskeleton)	K12757	NA
2	ENSG00000101336	HCK	1.59962	1.27285	0.329674	8.76143e-42	3.80544e-37	HCK proto-oncogene, Src family tyrosine kinase [Source:HGNC Symbol;Acc:HGNC:4840]	GO:0000166(nucleotide binding);GO:0001784(phosphotyrosine residue binding);GO:0002376(immune system process);GO:0002522(leukocyte migration involved in immune response);GO:0002758(innate immune response-activating signal transduction);GO:0004672(protein kinase activity);GO:0004713(protein tyrosine kinase activity);GO:0004715(non-membrane spanning protein tyrosine kinase activity);GO:0005102(signa…	04062(Chemokine signaling pathway);04666(Fc gamma R-mediated phagocytosis);05167(Kaposi sarcoma-associated herpesvirus infection)	K08893	EC:2.7.10.2
2	ENSG00000176845	METRNL	2.65566	2.14242	0.309824	1.37513e-41	5.97274e-37	meteorin like, glial cell differentiation regulator [Source:HGNC Symbol;Acc:HGNC:27584]	GO:0003674(molecular_function);GO:0005179(hormone activity);GO:0005576(extracellular region);GO:0005615(extracellular space);GO:0009409(response to cold);GO:0010469(regulation of signaling receptor activity);GO:0014850(response to muscle activity);GO:0045444(fat cell differentiation);GO:0050728(negative regulation of inflammatory response);GO:0050873(brown fat cell differentiation);GO:0070062(ext…	NA	NA	NA
2	ENSG00000125538	IL1B	14.1819	10.8386	0.387871	2.781e-41	1.2079e-36	interleukin 1 beta [Source:HGNC Symbol;Acc:HGNC:5992]	GO:0000165(MAPK cascade);GO:0000187(activation of MAPK activity);GO:0001660(fever generation);GO:0001934(positive regulation of protein phosphorylation);GO:0002711(positive regulation of T cell mediated immunity);GO:0005125(cytokine activity);GO:0005149(interleukin-1 receptor binding);GO:0005178(integrin binding);GO:0005515(protein binding);GO:0005576(extracellular region);GO:0005615(extracellula…	01523(Antifolate resistance);04010(MAPK signaling pathway);04060(Cytokine-cytokine receptor interaction);04064(NF-kappa B signaling pathway);04217(Necroptosis);04380(Osteoclast differentiation);04620(Toll-like receptor signaling pathway);04621(NOD-like receptor signaling pathway);04623(Cytosolic DNA-sensing pathway);04625(C-type lectin receptor signaling pathway);04640(Hematopoietic cell lineage)…	K04519	NA
2	ENSG00000198242	RPL23A	6.26346	5.08886	0.299616	3.29543e-41	1.43134e-36	ribosomal protein L23a [Source:HGNC Symbol;Acc:HGNC:10317]	GO:0000027(ribosomal large subunit assembly);GO:0000184(nuclear-transcribed mRNA catabolic process, nonsense-mediated decay);GO:0003723(RNA binding);GO:0003735(structural constituent of ribosome);GO:0005515(protein binding);GO:0005622(intracellular);GO:0005634(nucleus);GO:0005730(nucleolus);GO:0005737(cytoplasm);GO:0005829(cytosol);GO:0005840(ribosome);GO:0006412(translation);GO:0006413(translati…	03010(Ribosome)	K02893	NA
2	ENSG00000132510	KDM6B	3.45148	2.74233	0.331809	4.70739e-41	2.04461e-36	lysine demethylase 6B [Source:HGNC Symbol;Acc:HGNC:29012]	GO:0000978(RNA polymerase II proximal promoter sequence-specific DNA binding);GO:0002437(inflammatory response to antigenic stimulus);GO:0003682(chromatin binding);GO:0005515(protein binding);GO:0005634(nucleus);GO:0005654(nucleoplasm);GO:0006325(chromatin organization);GO:0006338(chromatin remodeling);GO:0006954(inflammatory response);GO:0008013(beta-catenin binding);GO:0010468(regulation of gen…	NA	K11448	EC:1.14.11.-
2	ENSG00000178982	EIF3K	3.28645	2.68248	0.292958	5.03071e-41	2.18504e-36	eukaryotic translation initiation factor 3 subunit K [Source:HGNC Symbol;Acc:HGNC:24656]	GO:0001732(formation of cytoplasmic translation initiation complex);GO:0002183(cytoplasmic translational initiation);GO:0003723(RNA binding);GO:0003743(translation initiation factor activity);GO:0005515(protein binding);GO:0005634(nucleus);GO:0005737(cytoplasm);GO:0005829(cytosol);GO:0005852(eukaryotic translation initiation factor 3 complex);GO:0006412(translation);GO:0006413(translational initi…	NA	K15028	NA
2	ENSG00000198814	GK	2.25677	1.71727	0.394141	5.3012e-41	2.30252e-36	glycerol kinase [Source:HGNC Symbol;Acc:HGNC:4289]	GO:0000166(nucleotide binding);GO:0004370(glycerol kinase activity);GO:0005515(protein binding);GO:0005524(ATP binding);GO:0005737(cytoplasm);GO:0005739(mitochondrion);GO:0005741(mitochondrial outer membrane);GO:0005829(cytosol);GO:0005975(carbohydrate metabolic process);GO:0006071(glycerol metabolic process);GO:0006072(glycerol-3-phosphate metabolic process);GO:0006641(triglyceride metabolic pro…	00561(Glycerolipid metabolism);03320(PPAR signaling pathway)	NA	NA
2	ENSG00000118564	FBXL5	1.02776	0.820974	0.324099	9.19659e-41	3.99445e-36	F-box and leucine rich repeat protein 5 [Source:HGNC Symbol;Acc:HGNC:13602]	GO:0000151(ubiquitin ligase complex);GO:0000209(protein polyubiquitination);GO:0004842(ubiquitin-protein transferase activity);GO:0005506(iron ion binding);GO:0005515(protein binding);GO:0005737(cytoplasm);GO:0005829(cytosol);GO:0006511(ubiquitin-dependent protein catabolic process);GO:0006879(cellular iron ion homeostasis);GO:0016567(protein ubiquitination);GO:0019005(SCF ubiquitin ligase comple…	NA	K10271	NA
2	ENSG00000140941	MAP1LC3B	2.94743	2.41532	0.287243	1.36939e-40	5.94781e-36	microtubule associated protein 1 light chain 3 beta [Source:HGNC Symbol;Acc:HGNC:13352]	GO:0000045(autophagosome assembly);GO:0000421(autophagosome membrane);GO:0000422(autophagy of mitochondrion);GO:0005515(protein binding);GO:0005622(intracellular);GO:0005737(cytoplasm);GO:0005739(mitochondrion);GO:0005776(autophagosome);GO:0005829(cytosol);GO:0005856(cytoskeleton);GO:0005874(microtubule);GO:0005930(axoneme);GO:0006914(autophagy);GO:0006995(cellular response to nitrogen starvation…	04216(Ferroptosis)	K10435	NA
2	ENSG00000261371	PECAM1	1.42883	1.10756	0.36745	1.83214e-40	7.95773e-36	platelet and endothelial cell adhesion molecule 1 [Source:HGNC Symbol;Acc:HGNC:8823]	GO:0001525(angiogenesis);GO:0001886(endothelial cell morphogenesis);GO:0002576(platelet degranulation);GO:0005515(protein binding);GO:0005615(extracellular space);GO:0005737(cytoplasm);GO:0005886(plasma membrane);GO:0006909(phagocytosis);GO:0007155(cell adhesion);GO:0007156(homophilic cell adhesion via plasma membrane adhesion molecules);GO:0007159(leukocyte cell-cell adhesion);GO:0007165(signal …	04514(Cell adhesion molecules (CAMs));04670(Leukocyte transendothelial migration);05144(Malaria);05418(Fluid shear stress and atherosclerosis)	NA	NA
2	ENSG00000113387	SUB1	3.30258	2.70677	0.28702	2.60657e-40	1.13214e-35	SUB1 homolog, transcriptional regulator [Source:HGNC Symbol;Acc:HGNC:19985]	GO:0001228(DNA-binding transcription activator activity, RNA polymerase II-specific);GO:0003677(DNA binding);GO:0003678(DNA helicase activity);GO:0003690(double-stranded DNA binding);GO:0003697(single-stranded DNA binding);GO:0003713(transcription coactivator activity);GO:0003723(RNA binding);GO:0005515(protein binding);GO:0005634(nucleus);GO:0005667(transcription factor complex);GO:0005730(nucle…	NA	NA	NA
2	ENSG00000114784	EIF1B	1.63794	1.31227	0.319822	2.83562e-40	1.23162e-35	eukaryotic translation initiation factor 1B [Source:HGNC Symbol;Acc:HGNC:30792]	GO:0003723(RNA binding);GO:0003743(translation initiation factor activity);GO:0005515(protein binding);GO:0005575(cellular_component);GO:0006412(translation);GO:0006413(translational initiation);GO:0006446(regulation of translational initiation);GO:0016282(eukaryotic 43S preinitiation complex);GO:0043024(ribosomal small subunit binding)	03013(RNA transport)	K03113	NA
2	ENSG00000173559	NABP1	2.63302	2.06797	0.348503	2.98827e-40	1.29793e-35	nucleic acid binding protein 1 [Source:HGNC Symbol;Acc:HGNC:26232]	GO:0000724(double-strand break repair via homologous recombination);GO:0000784(nuclear chromosome, telomeric region);GO:0003677(DNA binding);GO:0003697(single-stranded DNA binding);GO:0003723(RNA binding);GO:0005515(protein binding);GO:0005634(nucleus);GO:0005654(nucleoplasm);GO:0005829(cytosol);GO:0006281(DNA repair);GO:0006974(cellular response to DNA damage stimulus);GO:0007093(mitotic cell cy…	NA	NA	NA
2	ENSG00000105374	NKG7	0.42854	0.344486	0.314985	4.34715e-40	1.88814e-35	natural killer cell granule protein 7 [Source:HGNC Symbol;Acc:HGNC:7830]	GO:0005515(protein binding);GO:0005886(plasma membrane);GO:0005887(integral component of plasma membrane);GO:0016020(membrane);GO:0016021(integral component of membrane)	NA	NA	NA
2	ENSG00000085514	PILRA	1.23003	0.972916	0.338308	4.55437e-40	1.97815e-35	paired immunoglobin like type 2 receptor alpha [Source:HGNC Symbol;Acc:HGNC:20396]	GO:0005515(protein binding);GO:0005576(extracellular region);GO:0005886(plasma membrane);GO:0007165(signal transduction);GO:0016020(membrane);GO:0016021(integral component of membrane);GO:0016032(viral process);GO:0042288(MHC class I protein binding);GO:0050776(regulation of immune response);GO:0070062(extracellular exosome)	05168(Herpes simplex virus 1 infection)	K15411	NA
2	ENSG00000122026	RPL21	10.1952	8.32803	0.291837	5.65524e-40	2.4563e-35	ribosomal protein L21 [Source:HGNC Symbol;Acc:HGNC:10313]	GO:0000184(nuclear-transcribed mRNA catabolic process, nonsense-mediated decay);GO:0003723(RNA binding);GO:0003735(structural constituent of ribosome);GO:0005515(protein binding);GO:0005622(intracellular);GO:0005737(cytoplasm);GO:0005783(endoplasmic reticulum);GO:0005829(cytosol);GO:0005840(ribosome);GO:0006412(translation);GO:0006413(translational initiation);GO:0006614(SRP-dependent cotranslati…	03010(Ribosome)	K02889	NA
2	ENSG00000111859	NEDD9	0.793045	0.61379	0.369658	1.10527e-39	4.80065e-35	neural precursor cell expressed, developmentally down-regulated 9 [Source:HGNC Symbol;Acc:HGNC:7733]	GO:0000922(spindle pole);GO:0005515(protein binding);GO:0005634(nucleus);GO:0005654(nucleoplasm);GO:0005737(cytoplasm);GO:0005794(Golgi apparatus);GO:0005819(spindle);GO:0005829(cytosol);GO:0005856(cytoskeleton);GO:0005886(plasma membrane);GO:0005925(focal adhesion);GO:0005938(cell cortex);GO:0007010(cytoskeleton organization);GO:0007049(cell cycle);GO:0007155(cell adhesion);GO:0007165(signal tra…	NA	K16832	NA
2	ENSG00000156411	ATP5MPL	2.59173	2.12075	0.28934	1.46569e-39	6.36609e-35	ATP synthase membrane subunit 6.8PL [Source:HGNC Symbol;Acc:HGNC:1188]	GO:0003674(molecular_function);GO:0005575(cellular_component);GO:0005739(mitochondrion);GO:0005753(mitochondrial proton-transporting ATP synthase complex);GO:0008150(biological_process);GO:0016020(membrane);GO:0016021(integral component of membrane);GO:0031966(mitochondrial membrane)	NA	K18193	NA
2	ENSG00000112715	VEGFA	2.95964	2.23382	0.405911	1.65821e-39	7.20229e-35	vascular endothelial growth factor A [Source:HGNC Symbol;Acc:HGNC:12680]	GO:0000122(negative regulation of transcription by RNA polymerase II);GO:0001525(angiogenesis);GO:0001541(ovarian follicle development);GO:0001569(branching involved in blood vessel morphogenesis);GO:0001570(vasculogenesis);GO:0001666(response to hypoxia);GO:0001701(in utero embryonic development);GO:0001822(kidney development);GO:0001934(positive regulation of protein phosphorylation);GO:0001938…	01521(EGFR tyrosine kinase inhibitor resistance);04010(MAPK signaling pathway);04014(Ras signaling pathway);04015(Rap1 signaling pathway);04066(HIF-1 signaling pathway);04151(PI3K-Akt signaling pathway);04370(VEGF signaling pathway);04510(Focal adhesion);04926(Relaxin signaling pathway);04933(AGE-RAGE signaling pathway in diabetic complications);05163(Human cytomegalovirus infection);05165(Human …	K05448	NA
2	ENSG00000120690	ELF1	2.39969	1.95609	0.294874	2.96916e-39	1.28963e-34	E74 like ETS transcription factor 1 [Source:HGNC Symbol;Acc:HGNC:3316]	GO:0000978(RNA polymerase II proximal promoter sequence-specific DNA binding);GO:0000981(DNA-binding transcription factor activity, RNA polymerase II-specific);GO:0001228(DNA-binding transcription activator activity, RNA polymerase II-specific);GO:0001817(regulation of cytokine production);GO:0001959(regulation of cytokine-mediated signaling pathway);GO:0003677(DNA binding);GO:0003700(DNA-binding…	NA	NA	NA
2	ENSG00000173083	HPSE	0.956976	0.743268	0.364601	3.47477e-39	1.50923e-34	heparanase [Source:HGNC Symbol;Acc:HGNC:5164]	GO:0004566(beta-glucuronidase activity);GO:0005515(protein binding);GO:0005576(extracellular region);GO:0005634(nucleus);GO:0005654(nucleoplasm);GO:0005764(lysosome);GO:0005765(lysosomal membrane);GO:0006027(glycosaminoglycan catabolic process);GO:0006029(proteoglycan metabolic process);GO:0007155(cell adhesion);GO:0007160(cell-matrix adhesion);GO:0010575(positive regulation of vascular endotheli…	00531(Glycosaminoglycan degradation);05205(Proteoglycans in cancer)	K07964	EC:3.2.1.166
2	ENSG00000186074	CD300LF	0.360497	0.297658	0.276334	4.06309e-39	1.76476e-34	CD300 molecule like family member f [Source:HGNC Symbol;Acc:HGNC:29883]	GO:0001786(phosphatidylserine binding);GO:0002376(immune system process);GO:0005136(interleukin-4 receptor binding);GO:0005886(plasma membrane);GO:0008289(lipid binding);GO:0016020(membrane);GO:0016021(integral component of membrane);GO:0033004(negative regulation of mast cell activation);GO:0034125(negative regulation of MyD88-dependent toll-like receptor signaling pathway);GO:0035666(TRIF-depen…	NA	K20395	NA
2	ENSG00000164105	SAP30	2.57536	2.01429	0.354503	6.99789e-39	3.03946e-34	Sin3A associated protein 30 [Source:HGNC Symbol;Acc:HGNC:10532]	GO:0000118(histone deacetylase complex);GO:0000122(negative regulation of transcription by RNA polymerase II);GO:0003677(DNA binding);GO:0003714(transcription corepressor activity);GO:0004407(histone deacetylase activity);GO:0005515(protein binding);GO:0005634(nucleus);GO:0005654(nucleoplasm);GO:0006355(regulation of transcription, DNA-templated);GO:0016575(histone deacetylation);GO:0035914(skele…	05169(Epstein-Barr virus infection)	K19202	NA
2	ENSG00000120885	CLU	0.897702	0.683001	0.394348	8.36734e-39	3.63427e-34	clusterin [Source:HGNC Symbol;Acc:HGNC:2095]	GO:0000902(cell morphogenesis);GO:0001540(amyloid-beta binding);GO:0001774(microglial cell activation);GO:0001836(release of cytochrome c from mitochondria);GO:0002376(immune system process);GO:0002576(platelet degranulation);GO:0005102(signaling receptor binding);GO:0005515(protein binding);GO:0005576(extracellular region);GO:0005615(extracellular space);GO:0005634(nucleus);GO:0005737(cytoplasm)…	04610(Complement and coagulation cascades)	NA	NA
2	ENSG00000163512	AZI2	1.40455	1.10305	0.348614	9.03253e-39	3.92319e-34	5-azacytidine induced 2 [Source:HGNC Symbol;Acc:HGNC:24002]	GO:0000278(mitotic cell cycle);GO:0001816(cytokine production);GO:0005515(protein binding);GO:0005737(cytoplasm);GO:0007249(I-kappaB kinase/NF-kappaB signaling);GO:0016032(viral process);GO:0032607(interferon-alpha production);GO:0032609(interferon-gamma production);GO:0032635(interleukin-6 production);GO:0032640(tumor necrosis factor production);GO:0042110(T cell activation);GO:0044565(dendritic…	04622(RIG-I-like receptor signaling pathway)	K12651	NA
2	ENSG00000132205	EMILIN2	2.2422	1.86214	0.267956	1.54155e-38	6.69557e-34	elastin microfibril interfacer 2 [Source:HGNC Symbol;Acc:HGNC:19881]	GO:0005515(protein binding);GO:0005576(extracellular region);GO:0005581(collagen trimer);GO:0007155(cell adhesion);GO:0008150(biological_process);GO:0010811(positive regulation of cell-substrate adhesion);GO:0030023(extracellular matrix constituent conferring elasticity);GO:0031012(extracellular matrix);GO:0062023(collagen-containing extracellular matrix)	NA	NA	NA
2	ENSG00000166579	NDEL1	0.747659	0.602689	0.310966	2.03949e-38	8.85831e-34	nudE neurodevelopment protein 1 like 1 [Source:HGNC Symbol;Acc:HGNC:17620]	GO:0000132(establishment of mitotic spindle orientation);GO:0000226(microtubule cytoskeleton organization);GO:0000775(chromosome, centromeric region);GO:0000776(kinetochore);GO:0000777(condensed chromosome kinetochore);GO:0001764(neuron migration);GO:0001833(inner cell mass cell proliferation);GO:0005515(protein binding);GO:0005635(nuclear envelope);GO:0005694(chromosome);GO:0005737(cytoplasm);GO…	NA	K16739	NA
2	ENSG00000137393	RNF144B	1.43481	1.09082	0.39545	3.15956e-38	1.37232e-33	ring finger protein 144B [Source:HGNC Symbol;Acc:HGNC:21578]	GO:0000151(ubiquitin ligase complex);GO:0000209(protein polyubiquitination);GO:0004842(ubiquitin-protein transferase activity);GO:0005515(protein binding);GO:0005737(cytoplasm);GO:0005739(mitochondrion);GO:0005829(cytosol);GO:0006511(ubiquitin-dependent protein catabolic process);GO:0006915(apoptotic process);GO:0016020(membrane);GO:0016021(integral component of membrane);GO:0016567(protein ubiqu…	NA	K11975	EC:2.3.2.31
2	ENSG00000122122	SASH3	0.899127	0.741887	0.277327	3.33599e-38	1.44895e-33	SAM and SH3 domain containing 3 [Source:HGNC Symbol;Acc:HGNC:15975]	GO:0002639(positive regulation of immunoglobulin production);GO:0002726(positive regulation of T cell cytokine production);GO:0002821(positive regulation of adaptive immune response);GO:0005515(protein binding);GO:0005634(nucleus);GO:0005737(cytoplasm);GO:0030890(positive regulation of B cell proliferation);GO:0032729(positive regulation of interferon-gamma production);GO:0032733(positive regulat…	NA	NA	NA
2	ENSG00000112799	LY86	0.797259	0.634525	0.329372	7.18976e-38	3.1228e-33	lymphocyte antigen 86 [Source:HGNC Symbol;Acc:HGNC:16837]	GO:0002376(immune system process);GO:0005515(protein binding);GO:0005576(extracellular region);GO:0005615(extracellular space);GO:0006954(inflammatory response);GO:0006955(immune response);GO:0031666(positive regulation of lipopolysaccharide-mediated signaling pathway);GO:0045087(innate immune response)	NA	NA	NA
2	ENSG00000130844	ZNF331	3.74881	2.73486	0.454962	9.34011e-38	4.05678e-33	zinc finger protein 331 [Source:HGNC Symbol;Acc:HGNC:15489]	GO:0000981(DNA-binding transcription factor activity, RNA polymerase II-specific);GO:0003676(nucleic acid binding);GO:0003677(DNA binding);GO:0005622(intracellular);GO:0005634(nucleus);GO:0006355(regulation of transcription, DNA-templated);GO:0006357(regulation of transcription by RNA polymerase II);GO:0008270(zinc ion binding);GO:0046872(metal ion binding)	05168(Herpes simplex virus 1 infection)	K09228	NA
2	ENSG00000115828	QPCT	0.408626	0.336348	0.280826	1.36297e-37	5.91991e-33	glutaminyl-peptide cyclotransferase [Source:HGNC Symbol;Acc:HGNC:9753]	GO:0005576(extracellular region);GO:0006464(cellular protein modification process);GO:0008270(zinc ion binding);GO:0016603(glutaminyl-peptide cyclotransferase activity);GO:0016740(transferase activity);GO:0016746(transferase activity, transferring acyl groups);GO:0017186(peptidyl-pyroglutamic acid biosynthetic process, using glutaminyl-peptide cyclotransferase);GO:0035580(specific granule lumen);…	NA	K00683	EC:2.3.2.5
2	ENSG00000107341	UBE2R2	1.88632	1.52228	0.309343	1.67885e-37	7.29191e-33	ubiquitin conjugating enzyme E2 R2 [Source:HGNC Symbol;Acc:HGNC:19907]	GO:0000166(nucleotide binding);GO:0000209(protein polyubiquitination);GO:0004842(ubiquitin-protein transferase activity);GO:0005515(protein binding);GO:0005524(ATP binding);GO:0005829(cytosol);GO:0006511(ubiquitin-dependent protein catabolic process);GO:0006513(protein monoubiquitination);GO:0016567(protein ubiquitination);GO:0016740(transferase activity);GO:0043161(proteasome-mediated ubiquitin-…	04120(Ubiquitin mediated proteolysis)	K02207	EC:2.3.2.23
2	ENSG00000008083	JARID2	2.03514	1.62167	0.327648	3.05793e-37	1.32818e-32	jumonji and AT-rich interaction domain containing 2 [Source:HGNC Symbol;Acc:HGNC:6196]	GO:0000122(negative regulation of transcription by RNA polymerase II);GO:0000977(RNA polymerase II regulatory region sequence-specific DNA binding);GO:0000981(DNA-binding transcription factor activity, RNA polymerase II-specific);GO:0001227(DNA-binding transcription repressor activity, RNA polymerase II-specific);GO:0001889(liver development);GO:0003677(DNA binding);GO:0003682(chromatin binding);…	04550(Signaling pathways regulating pluripotency of stem cells)	K11478	NA
2	ENSG00000135604	STX11	0.831102	0.662336	0.327461	4.55005e-37	1.97627e-32	syntaxin 11 [Source:HGNC Symbol;Acc:HGNC:11429]	GO:0000149(SNARE binding);GO:0005484(SNAP receptor activity);GO:0005515(protein binding);GO:0005794(Golgi apparatus);GO:0005886(plasma membrane);GO:0006886(intracellular protein transport);GO:0006887(exocytosis);GO:0006906(vesicle fusion);GO:0008021(synaptic vesicle);GO:0012505(endomembrane system);GO:0015031(protein transport);GO:0016020(membrane);GO:0016021(integral component of membrane);GO:00…	04130(SNARE interactions in vesicular transport)	K08487	NA
2	ENSG00000157514	TSC22D3	5.02185	3.9457	0.347939	8.98309e-37	3.90172e-32	TSC22 domain family member 3 [Source:HGNC Symbol;Acc:HGNC:3051]	GO:0000981(DNA-binding transcription factor activity, RNA polymerase II-specific);GO:0003700(DNA-binding transcription factor activity);GO:0005634(nucleus);GO:0005737(cytoplasm);GO:0005829(cytosol);GO:0006355(regulation of transcription, DNA-templated);GO:0006357(regulation of transcription by RNA polymerase II);GO:0006970(response to osmotic stress);GO:0034220(ion transmembrane transport);GO:007…	NA	NA	NA
2	ENSG00000196924	FLNA	4.83261	3.88261	0.315776	1.70744e-36	7.41608e-32	filamin A [Source:HGNC Symbol;Acc:HGNC:3754]	GO:0001664(G protein-coupled receptor binding);GO:0002576(platelet degranulation);GO:0003723(RNA binding);GO:0003779(actin binding);GO:0005515(protein binding);GO:0005576(extracellular region);GO:0005634(nucleus);GO:0005730(nucleolus);GO:0005737(cytoplasm);GO:0005829(cytosol);GO:0005856(cytoskeleton);GO:0005884(actin filament);GO:0005886(plasma membrane);GO:0005911(cell-cell junction);GO:0005925(…	04010(MAPK signaling pathway);04510(Focal adhesion);05132(Salmonella infection);05205(Proteoglycans in cancer)	NA	NA
2	ENSG00000186350	RXRA	1.37014	1.10391	0.311701	2.89034e-36	1.25539e-31	retinoid X receptor alpha [Source:HGNC Symbol;Acc:HGNC:10477]	GO:0000122(negative regulation of transcription by RNA polymerase II);GO:0000790(nuclear chromatin);GO:0000977(RNA polymerase II regulatory region sequence-specific DNA binding);GO:0000981(DNA-binding transcription factor activity, RNA polymerase II-specific);GO:0001701(in utero embryonic development);GO:0001890(placenta development);GO:0001893(maternal placenta development);GO:0001972(retinoic a…	03320(PPAR signaling pathway);04151(PI3K-Akt signaling pathway);04659(Th17 cell differentiation);04919(Thyroid hormone signaling pathway);04920(Adipocytokine signaling pathway);04928(Parathyroid hormone synthesis, secretion and action);04932(Non-alcoholic fatty liver disease (NAFLD));04976(Bile secretion);05160(Hepatitis C);05200(Pathways in cancer);05202(Transcriptional misregulation in cancer);…	K08524	NA
2	ENSG00000134686	PHC2	2.09619	1.68141	0.318099	4.54663e-36	1.97479e-31	polyhomeotic homolog 2 [Source:HGNC Symbol;Acc:HGNC:3183]	GO:0000792(heterochromatin);GO:0003677(DNA binding);GO:0005515(protein binding);GO:0005634(nucleus);GO:0005654(nucleoplasm);GO:0007275(multicellular organism development);GO:0007283(spermatogenesis);GO:0008270(zinc ion binding);GO:0031519(PcG protein complex);GO:0035102(PRC1 complex);GO:0042802(identical protein binding);GO:0046872(metal ion binding)	NA	K11457	NA
2	ENSG00000160796	NBEAL2	0.517315	0.418095	0.307212	7.07116e-36	3.07129e-31	neurobeachin like 2 [Source:HGNC Symbol;Acc:HGNC:31928]	GO:0005515(protein binding);GO:0005783(endoplasmic reticulum);GO:0005886(plasma membrane);GO:0030220(platelet formation);GO:0043312(neutrophil degranulation);GO:0070821(tertiary granule membrane);GO:0101003(ficolin-1-rich granule membrane)	NA	K23286	NA
2	ENSG00000119508	NR4A3	2.42521	1.85722	0.384967	1.1223e-35	4.8746e-31	nuclear receptor subfamily 4 group A member 3 [Source:HGNC Symbol;Acc:HGNC:7982]	GO:0000122(negative regulation of transcription by RNA polymerase II);GO:0000977(RNA polymerase II regulatory region sequence-specific DNA binding);GO:0000978(RNA polymerase II proximal promoter sequence-specific DNA binding);GO:0000981(DNA-binding transcription factor activity, RNA polymerase II-specific);GO:0001223(transcription coactivator binding);GO:0001228(DNA-binding transcription activato…	05202(Transcriptional misregulation in cancer)	NA	NA
2	ENSG00000141505	ASGR1	0.86892	0.696198	0.319727	1.18299e-35	5.13818e-31	asialoglycoprotein receptor 1 [Source:HGNC Symbol;Acc:HGNC:742]	GO:0004873(asialoglycoprotein receptor activity);GO:0005515(protein binding);GO:0005576(extracellular region);GO:0005886(plasma membrane);GO:0005887(integral component of plasma membrane);GO:0006897(endocytosis);GO:0006898(receptor-mediated endocytosis);GO:0016020(membrane);GO:0016021(integral component of membrane);GO:0016032(viral process);GO:0018279(protein N-linked glycosylation via asparagin…	04918(Thyroid hormone synthesis)	NA	NA
2	ENSG00000121064	SCPEP1	0.950184	0.759757	0.322669	1.2206e-35	5.30156e-31	serine carboxypeptidase 1 [Source:HGNC Symbol;Acc:HGNC:29507]	GO:0004180(carboxypeptidase activity);GO:0004185(serine-type carboxypeptidase activity);GO:0005576(extracellular region);GO:0005829(cytosol);GO:0006508(proteolysis);GO:0008233(peptidase activity);GO:0016787(hydrolase activity);GO:0042573(retinoic acid metabolic process);GO:0045776(negative regulation of blood pressure);GO:0051603(proteolysis involved in cellular protein catabolic process);GO:0070…	NA	K09646	EC:3.4.16.-
2	ENSG00000112576	CCND3	0.827408	0.664737	0.315815	2.10344e-35	9.13608e-31	cyclin D3 [Source:HGNC Symbol;Acc:HGNC:1585]	GO:0000079(regulation of cyclin-dependent protein serine/threonine kinase activity);GO:0000122(negative regulation of transcription by RNA polymerase II);GO:0000278(mitotic cell cycle);GO:0000307(cyclin-dependent protein kinase holoenzyme complex);GO:0001934(positive regulation of protein phosphorylation);GO:0004672(protein kinase activity);GO:0004693(cyclin-dependent protein serine/threonine kin…	04110(Cell cycle);04115(p53 signaling pathway);04151(PI3K-Akt signaling pathway);04218(Cellular senescence);04310(Wnt signaling pathway);04390(Hippo signaling pathway);04510(Focal adhesion);04630(Jak-STAT signaling pathway);05162(Measles);05165(Human papillomavirus infection);05166(Human T-cell leukemia virus 1 infection);05169(Epstein-Barr virus infection);05200(Pathways in cancer);05203(Viral c…	NA	NA
2	ENSG00000112137	PHACTR1	3.19442	2.51026	0.347715	4.01936e-35	1.74577e-30	phosphatase and actin regulator 1 [Source:HGNC Symbol;Acc:HGNC:20990]	GO:0003779(actin binding);GO:0004864(protein phosphatase inhibitor activity);GO:0005634(nucleus);GO:0005737(cytoplasm);GO:0005829(cytosol);GO:0008157(protein phosphatase 1 binding);GO:0019888(protein phosphatase regulator activity);GO:0030054(cell junction);GO:0031032(actomyosin structure organization);GO:0031532(actin cytoskeleton reorganization);GO:0032515(negative regulation of phosphoprotein …	NA	NA	NA
2	ENSG00000105640	RPL18A	16.2699	13.5841	0.260285	4.45486e-35	1.93492e-30	ribosomal protein L18a [Source:HGNC Symbol;Acc:HGNC:10311]	GO:0000184(nuclear-transcribed mRNA catabolic process, nonsense-mediated decay);GO:0002181(cytoplasmic translation);GO:0003723(RNA binding);GO:0003735(structural constituent of ribosome);GO:0005515(protein binding);GO:0005829(cytosol);GO:0005840(ribosome);GO:0006412(translation);GO:0006413(translational initiation);GO:0006614(SRP-dependent cotranslational protein targeting to membrane);GO:0014069…	03010(Ribosome)	K02882	NA
2	ENSG00000160211	G6PD	0.730768	0.599161	0.28647	6.11793e-35	2.65726e-30	glucose-6-phosphate dehydrogenase [Source:HGNC Symbol;Acc:HGNC:4057]	GO:0004345(glucose-6-phosphate dehydrogenase activity);GO:0005515(protein binding);GO:0005536(glucose binding);GO:0005634(nucleus);GO:0005737(cytoplasm);GO:0005829(cytosol);GO:0005975(carbohydrate metabolic process);GO:0006006(glucose metabolic process);GO:0006098(pentose-phosphate shunt);GO:0006629(lipid metabolic process);GO:0006695(cholesterol biosynthetic process);GO:0006739(NADP metabolic pr…	00030(Pentose phosphate pathway);00480(Glutathione metabolism);05230(Central carbon metabolism in cancer)	NA	NA
2	ENSG00000105639	JAK3	0.43154	0.352603	0.291448	7.16346e-35	3.11138e-30	Janus kinase 3 [Source:HGNC Symbol;Acc:HGNC:6193]	GO:0000165(MAPK cascade);GO:0000166(nucleotide binding);GO:0002250(adaptive immune response);GO:0002376(immune system process);GO:0002731(negative regulation of dendritic cell cytokine production);GO:0004672(protein kinase activity);GO:0004713(protein tyrosine kinase activity);GO:0004715(non-membrane spanning protein tyrosine kinase activity);GO:0005515(protein binding);GO:0005524(ATP binding);GO…	04062(Chemokine signaling pathway);04151(PI3K-Akt signaling pathway);04217(Necroptosis);04550(Signaling pathways regulating pluripotency of stem cells);04630(Jak-STAT signaling pathway);04658(Th1 and Th2 cell differentiation);04659(Th17 cell differentiation);05161(Hepatitis B);05162(Measles);05166(Human T-cell leukemia virus 1 infection);05169(Epstein-Barr virus infection);05200(Pathways in cance…	K11218	EC:2.7.10.2
2	ENSG00000126860	EVI2A	1.48408	1.22813	0.273113	7.25714e-35	3.15207e-30	ecotropic viral integration site 2A [Source:HGNC Symbol;Acc:HGNC:3499]	GO:0004888(transmembrane signaling receptor activity);GO:0016020(membrane);GO:0016021(integral component of membrane)	NA	NA	NA
2	ENSG00000166501	PRKCB	0.955527	0.773828	0.304283	7.72232e-35	3.35411e-30	protein kinase C beta [Source:HGNC Symbol;Acc:HGNC:9395]	GO:0000166(nucleotide binding);GO:0002250(adaptive immune response);GO:0002376(immune system process);GO:0003682(chromatin binding);GO:0004672(protein kinase activity);GO:0004674(protein serine/threonine kinase activity);GO:0004697(protein kinase C activity);GO:0005080(protein kinase C binding);GO:0005246(calcium channel regulator activity);GO:0005515(protein binding);GO:0005524(ATP binding);GO:0…	01521(EGFR tyrosine kinase inhibitor resistance);04010(MAPK signaling pathway);04012(ErbB signaling pathway);04014(Ras signaling pathway);04015(Rap1 signaling pathway);04020(Calcium signaling pathway);04062(Chemokine signaling pathway);04064(NF-kappa B signaling pathway);04066(HIF-1 signaling pathway);04070(Phosphatidylinositol signaling system);04071(Sphingolipid signaling pathway);04150(mTOR si…	NA	NA
2	ENSG00000150681	RGS18	0.656634	0.520796	0.334372	1.50258e-34	6.52631e-30	regulator of G protein signaling 18 [Source:HGNC Symbol;Acc:HGNC:14261]	GO:0003924(GTPase activity);GO:0005096(GTPase activator activity);GO:0005515(protein binding);GO:0005737(cytoplasm);GO:0005886(plasma membrane);GO:0007186(G protein-coupled receptor signaling pathway);GO:0008277(regulation of G protein-coupled receptor signaling pathway);GO:0009968(negative regulation of signal transduction);GO:0043547(positive regulation of GTPase activity)	NA	K16449	NA
2	ENSG00000235568	NFAM1	0.59157	0.479209	0.303894	4.0039e-34	1.73905e-29	NFAT activating protein with ITAM motif 1 [Source:HGNC Symbol;Acc:HGNC:29872]	GO:0001819(positive regulation of cytokine production);GO:0004888(transmembrane signaling receptor activity);GO:0005886(plasma membrane);GO:0006954(inflammatory response);GO:0007165(signal transduction);GO:0007166(cell surface receptor signaling pathway);GO:0016020(membrane);GO:0016021(integral component of membrane);GO:0030183(B cell differentiation);GO:0035556(intracellular signal transduction)…	NA	NA	NA
2	ENSG00000177410	ZFAS1	2.89786	2.40302	0.270138	6.9979e-34	3.03947e-29	ZNFX1 antisense RNA 1 [Source:HGNC Symbol;Acc:HGNC:33101]	NA	NA	NA	NA
2	ENSG00000162444	RBP7	1.15835	0.911928	0.345083	1.20726e-33	5.24362e-29	retinol binding protein 7 [Source:HGNC Symbol;Acc:HGNC:30316]	GO:0005501(retinoid binding);GO:0005515(protein binding);GO:0005737(cytoplasm);GO:0008289(lipid binding);GO:0016918(retinal binding);GO:0019841(retinol binding)	NA	NA	NA
2	ENSG00000125753	VASP	3.04199	2.52677	0.267719	1.97719e-33	8.58774e-29	vasodilator stimulated phosphoprotein [Source:HGNC Symbol;Acc:HGNC:12652]	GO:0001843(neural tube closure);GO:0003779(actin binding);GO:0005515(protein binding);GO:0005522(profilin binding);GO:0005737(cytoplasm);GO:0005829(cytosol);GO:0005856(cytoskeleton);GO:0005886(plasma membrane);GO:0005923(bicellular tight junction);GO:0005925(focal adhesion);GO:0007411(axon guidance);GO:0008154(actin polymerization or depolymerization);GO:0015629(actin cytoskeleton);GO:0016020(mem…	04015(Rap1 signaling pathway);04022(cGMP-PKG signaling pathway);04510(Focal adhesion);04530(Tight junction);04611(Platelet activation);04666(Fc gamma R-mediated phagocytosis);04670(Leukocyte transendothelial migration)	K06274	NA
2	ENSG00000086730	LAT2	1.1886	0.963014	0.303631	2.19179e-33	9.5198e-29	linker for activation of T cells family member 2 [Source:HGNC Symbol;Acc:HGNC:12749]	GO:0002250(adaptive immune response);GO:0002376(immune system process);GO:0002764(immune response-regulating signaling pathway);GO:0005515(protein binding);GO:0005886(plasma membrane);GO:0016020(membrane);GO:0016021(integral component of membrane);GO:0019722(calcium-mediated signaling);GO:0035556(intracellular signal transduction);GO:0038095(Fc-epsilon receptor signaling pathway);GO:0042113(B cel…	NA	NA	NA
2	ENSG00000103381	CPPED1	0.760827	0.63531	0.260108	3.79162e-33	1.64685e-28	calcineurin like phosphoesterase domain containing 1 [Source:HGNC Symbol;Acc:HGNC:25632]	GO:0004721(phosphoprotein phosphatase activity);GO:0005576(extracellular region);GO:0005737(cytoplasm);GO:0005829(cytosol);GO:0005886(plasma membrane);GO:0006470(protein dephosphorylation);GO:0016787(hydrolase activity);GO:0035578(azurophil granule lumen);GO:0043312(neutrophil degranulation);GO:0046872(metal ion binding)	NA	K21814	EC:3.1.3.16
2	ENSG00000168209	DDIT4	1.74549	1.3989	0.319334	4.22331e-33	1.83435e-28	DNA damage inducible transcript 4 [Source:HGNC Symbol;Acc:HGNC:24944]	GO:0001666(response to hypoxia);GO:0001764(neuron migration);GO:0005622(intracellular);GO:0005737(cytoplasm);GO:0005739(mitochondrion);GO:0005829(cytosol);GO:0006915(apoptotic process);GO:0007420(brain development);GO:0008283(cell population proliferation);GO:0009968(negative regulation of signal transduction);GO:0010801(negative regulation of peptidyl-threonine phosphorylation);GO:0030182(neuron…	04140(Autophagy - animal);04150(mTOR signaling pathway);04151(PI3K-Akt signaling pathway);05206(MicroRNAs in cancer)	K08270	NA
2	ENSG00000120802	TMPO	0.825119	0.666836	0.307271	4.6032e-33	1.99935e-28	thymopoietin [Source:HGNC Symbol;Acc:HGNC:11875]	GO:0000785(chromatin);GO:0003677(DNA binding);GO:0005515(protein binding);GO:0005521(lamin binding);GO:0005634(nucleus);GO:0005635(nuclear envelope);GO:0005637(nuclear inner membrane);GO:0005694(chromosome);GO:0005737(cytoplasm);GO:0006355(regulation of transcription, DNA-templated);GO:0016020(membrane);GO:0016021(integral component of membrane);GO:0031965(nuclear membrane);GO:0045296(cadherin bi…	NA	NA	NA
2	ENSG00000173451	THAP2	0.831533	0.662171	0.328569	9.73147e-33	4.22677e-28	THAP domain containing 2 [Source:HGNC Symbol;Acc:HGNC:20854]	GO:0000981(DNA-binding transcription factor activity, RNA polymerase II-specific);GO:0003676(nucleic acid binding);GO:0003677(DNA binding);GO:0005730(nucleolus);GO:0006357(regulation of transcription by RNA polymerase II);GO:0046872(metal ion binding)	NA	K23204	NA
2	ENSG00000129292	PHF20L1	1.40279	1.1444	0.2937	1.59079e-32	6.90942e-28	PHD finger protein 20 like 1 [Source:HGNC Symbol;Acc:HGNC:24280]	GO:0005515(protein binding);GO:0005634(nucleus);GO:0006355(regulation of transcription, DNA-templated);GO:0046872(metal ion binding)	NA	K18402	NA
2	ENSG00000101084	RAB5IF	1.03935	0.857536	0.277416	1.81703e-32	7.8921e-28	RAB5 interacting factor [Source:HGNC Symbol;Acc:HGNC:15870]	GO:0003674(molecular_function);GO:0005575(cellular_component);GO:0008150(biological_process);GO:0016020(membrane);GO:0016021(integral component of membrane)	NA	NA	NA
2	ENSG00000105849	TWISTNB	1.56599	1.15678	0.436969	2.59322e-32	1.12634e-27	TWIST neighbor [Source:HGNC Symbol;Acc:HGNC:18027]	GO:0001054(RNA polymerase I activity);GO:0003899(DNA-directed 5'-3' RNA polymerase activity);GO:0005634(nucleus);GO:0005654(nucleoplasm);GO:0005730(nucleolus);GO:0005736(RNA polymerase I complex);GO:0006351(transcription, DNA-templated);GO:0006361(transcription initiation from RNA polymerase I promoter);GO:0006362(transcription elongation from RNA polymerase I promoter);GO:0006363(termination of …	03020(RNA polymerase)	K03004	NA
2	ENSG00000116337	AMPD2	0.72684	0.585731	0.311401	2.65423e-32	1.15284e-27	adenosine monophosphate deaminase 2 [Source:HGNC Symbol;Acc:HGNC:469]	GO:0003876(AMP deaminase activity);GO:0005515(protein binding);GO:0005829(cytosol);GO:0006188(IMP biosynthetic process);GO:0009117(nucleotide metabolic process);GO:0009168(purine ribonucleoside monophosphate biosynthetic process);GO:0016787(hydrolase activity);GO:0019239(deaminase activity);GO:0032264(IMP salvage);GO:0043101(purine-containing compound salvage);GO:0046033(AMP metabolic process);GO…	00230(Purine metabolism)	NA	NA
2	ENSG00000175130	MARCKSL1	1.22265	0.95053	0.363212	4.0092e-32	1.74136e-27	MARCKS like 1 [Source:HGNC Symbol;Acc:HGNC:7142]	GO:0003779(actin binding);GO:0005515(protein binding);GO:0005516(calmodulin binding);GO:0005737(cytoplasm);GO:0005856(cytoskeleton);GO:0005886(plasma membrane);GO:0008284(positive regulation of cell population proliferation);GO:0016020(membrane);GO:0070062(extracellular exosome)	04666(Fc gamma R-mediated phagocytosis);05140(Leishmaniasis)	K13536	NA
2	ENSG00000173334	TRIB1	1.86351	1.47068	0.341542	1.10763e-31	4.81087e-27	tribbles pseudokinase 1 [Source:HGNC Symbol;Acc:HGNC:16891]	GO:0004672(protein kinase activity);GO:0004860(protein kinase inhibitor activity);GO:0005515(protein binding);GO:0005524(ATP binding);GO:0005634(nucleus);GO:0005737(cytoplasm);GO:0006468(protein phosphorylation);GO:0006469(negative regulation of protein kinase activity);GO:0007254(JNK cascade);GO:0008134(transcription factor binding);GO:0014912(negative regulation of smooth muscle cell migration)…	NA	K08814	NA
2	ENSG00000062282	DGAT2	0.409093	0.339589	0.268641	1.46118e-31	6.34651e-27	diacylglycerol O-acyltransferase 2 [Source:HGNC Symbol;Acc:HGNC:16940]	GO:0003846(2-acylglycerol O-acyltransferase activity);GO:0004144(diacylglycerol O-acyltransferase activity);GO:0005737(cytoplasm);GO:0005739(mitochondrion);GO:0005783(endoplasmic reticulum);GO:0005789(endoplasmic reticulum membrane);GO:0005811(lipid droplet);GO:0006071(glycerol metabolic process);GO:0006629(lipid metabolic process);GO:0010867(positive regulation of triglyceride biosynthetic proce…	00561(Glycerolipid metabolism);04975(Fat digestion and absorption)	K11160	2.3.1.75;EC:2.3.1.20
2	ENSG00000067064	IDI1	1.43942	1.18985	0.274712	1.46493e-31	6.36278e-27	isopentenyl-diphosphate delta isomerase 1 [Source:HGNC Symbol;Acc:HGNC:5387]	GO:0004452(isopentenyl-diphosphate delta-isomerase activity);GO:0005777(peroxisome);GO:0005829(cytosol);GO:0006629(lipid metabolic process);GO:0006694(steroid biosynthetic process);GO:0006695(cholesterol biosynthetic process);GO:0008202(steroid metabolic process);GO:0008203(cholesterol metabolic process);GO:0008299(isoprenoid biosynthetic process);GO:0009240(isopentenyl diphosphate biosynthetic p…	00900(Terpenoid backbone biosynthesis)	K01823	EC:5.3.3.2
2	ENSG00000141574	SECTM1	0.742012	0.593876	0.32128	1.95626e-31	8.4968e-27	secreted and transmembrane 1 [Source:HGNC Symbol;Acc:HGNC:10707]	GO:0005125(cytokine activity);GO:0005576(extracellular region);GO:0005615(extracellular space);GO:0005794(Golgi apparatus);GO:0005886(plasma membrane);GO:0006955(immune response);GO:0007498(mesoderm development);GO:0010469(regulation of signaling receptor activity);GO:0016020(membrane);GO:0016021(integral component of membrane);GO:0043123(positive regulation of I-kappaB kinase/NF-kappaB signaling…	NA	NA	NA
2	ENSG00000205269	TMEM170B	0.572241	0.469404	0.285794	2.35927e-31	1.02473e-26	transmembrane protein 170B [Source:HGNC Symbol;Acc:HGNC:34244]	GO:0005515(protein binding);GO:0005886(plasma membrane);GO:0016020(membrane);GO:0016021(integral component of membrane);GO:0016055(Wnt signaling pathway);GO:0090090(negative regulation of canonical Wnt signaling pathway)	NA	NA	NA
2	ENSG00000008394	MGST1	0.907373	0.736071	0.301851	2.46813e-31	1.07201e-26	microsomal glutathione S-transferase 1 [Source:HGNC Symbol;Acc:HGNC:7061]	GO:0004364(glutathione transferase activity);GO:0004602(glutathione peroxidase activity);GO:0005515(protein binding);GO:0005634(nucleus);GO:0005739(mitochondrion);GO:0005741(mitochondrial outer membrane);GO:0005778(peroxisomal membrane);GO:0005783(endoplasmic reticulum);GO:0005789(endoplasmic reticulum membrane);GO:0005886(plasma membrane);GO:0006749(glutathione metabolic process);GO:0006805(xeno…	00480(Glutathione metabolism);00980(Metabolism of xenobiotics by cytochrome P450);00982(Drug metabolism - cytochrome P450);00983(Drug metabolism - other enzymes);01524(Platinum drug resistance);05200(Pathways in cancer);05204(Chemical carcinogenesis);05225(Hepatocellular carcinoma);05418(Fluid shear stress and atherosclerosis)	K00799	EC:2.5.1.18
2	ENSG00000108932	SLC16A6	1.08404	0.832537	0.380837	3.27084e-31	1.42066e-26	solute carrier family 16 member 6 [Source:HGNC Symbol;Acc:HGNC:10927]	GO:0005886(plasma membrane);GO:0005887(integral component of plasma membrane);GO:0008028(monocarboxylic acid transmembrane transporter activity);GO:0015293(symporter activity);GO:0015718(monocarboxylic acid transport);GO:0016020(membrane);GO:0016021(integral component of membrane);GO:0055085(transmembrane transport)	NA	K08183	NA
2	ENSG00000127507	ADGRE2	1.33828	1.0972	0.286554	3.44859e-31	1.49786e-26	adhesion G protein-coupled receptor E2 [Source:HGNC Symbol;Acc:HGNC:3337]	GO:0004888(transmembrane signaling receptor activity);GO:0004930(G protein-coupled receptor activity);GO:0005509(calcium ion binding);GO:0005886(plasma membrane);GO:0005887(integral component of plasma membrane);GO:0006954(inflammatory response);GO:0007155(cell adhesion);GO:0007165(signal transduction);GO:0007166(cell surface receptor signaling pathway);GO:0007186(G protein-coupled receptor signa…	NA	K08443	NA
2	ENSG00000072401	UBE2D1	1.15855	0.942167	0.298268	4.96125e-31	2.15487e-26	ubiquitin conjugating enzyme E2 D1 [Source:HGNC Symbol;Acc:HGNC:12474]	GO:0000122(negative regulation of transcription by RNA polymerase II);GO:0000151(ubiquitin ligase complex);GO:0000166(nucleotide binding);GO:0000209(protein polyubiquitination);GO:0002756(MyD88-independent toll-like receptor signaling pathway);GO:0004842(ubiquitin-protein transferase activity);GO:0005515(protein binding);GO:0005524(ATP binding);GO:0005654(nucleoplasm);GO:0005737(cytoplasm);GO:000…	04120(Ubiquitin mediated proteolysis);04141(Protein processing in endoplasmic reticulum)	K06689	EC:2.3.2.23
2	ENSG00000068831	RASGRP2	0.546666	0.445743	0.294447	5.97666e-31	2.5959e-26	RAS guanyl releasing protein 2 [Source:HGNC Symbol;Acc:HGNC:9879]	GO:0001558(regulation of cell growth);GO:0005085(guanyl-nucleotide exchange factor activity);GO:0005509(calcium ion binding);GO:0005622(intracellular);GO:0005737(cytoplasm);GO:0005829(cytosol);GO:0005886(plasma membrane);GO:0007165(signal transduction);GO:0007264(small GTPase mediated signal transduction);GO:0007265(Ras protein signal transduction);GO:0008289(lipid binding);GO:0016020(membrane);G…	04010(MAPK signaling pathway);04014(Ras signaling pathway);04015(Rap1 signaling pathway);04062(Chemokine signaling pathway);04611(Platelet activation);05200(Pathways in cancer)	K12361	NA
2	ENSG00000185262	UBALD2	1.75307	1.42864	0.295246	6.1976e-31	2.69187e-26	UBA like domain containing 2 [Source:HGNC Symbol;Acc:HGNC:28438]	GO:0005515(protein binding)	NA	NA	NA
2	ENSG00000255112	CHMP1B	2.34803	1.94752	0.269812	1.58591e-30	6.88825e-26	charged multivesicular body protein 1B [Source:HGNC Symbol;Acc:HGNC:24287]	GO:0000815(ESCRT III complex);GO:0005515(protein binding);GO:0005634(nucleus);GO:0005737(cytoplasm);GO:0005768(endosome);GO:0005771(multivesicular body);GO:0005829(cytosol);GO:0006997(nucleus organization);GO:0007034(vacuolar transport);GO:0007049(cell cycle);GO:0007080(mitotic metaphase plate congression);GO:0010008(endosome membrane);GO:0010824(regulation of centrosome duplication);GO:0015031(p…	04144(Endocytosis);04217(Necroptosis)	K12197	NA
2	ENSG00000140455	AC007950.1	1.48866	1.22046	0.28659	2.05528e-30	8.92692e-26	ubiquitin specific peptidase 3 [Source:NCBI gene;Acc:9960]	GO:0000122(negative regulation of transcription by RNA polymerase II);GO:0000278(mitotic cell cycle);GO:0000790(nuclear chromatin);GO:0000978(RNA polymerase II proximal promoter sequence-specific DNA binding);GO:0004843(thiol-dependent ubiquitin-specific protease activity);GO:0005634(nucleus);GO:0005654(nucleoplasm);GO:0005737(cytoplasm);GO:0006281(DNA repair);GO:0006325(chromatin organization);G…	NA	K11986	EC:3.4.19.12
2	ENSG00000280138	AC027290.2	1.70051	1.3343	0.349889	2.73426e-30	1.1876e-25	novel transcript	NA	NA	NA	NA
2	ENSG00000170525	PFKFB3	1.44424	1.14984	0.328882	2.94296e-30	1.27825e-25	6-phosphofructo-2-kinase/fructose-2,6-biphosphatase 3 [Source:HGNC Symbol;Acc:HGNC:8874]	GO:0000166(nucleotide binding);GO:0003824(catalytic activity);GO:0003873(6-phosphofructo-2-kinase activity);GO:0004331(fructose-2,6-bisphosphate 2-phosphatase activity);GO:0005524(ATP binding);GO:0005654(nucleoplasm);GO:0005829(cytosol);GO:0006000(fructose metabolic process);GO:0006003(fructose 2,6-bisphosphate metabolic process);GO:0007420(brain development);GO:0008152(metabolic process);GO:0016…	00051(Fructose and mannose metabolism);04066(HIF-1 signaling pathway);04152(AMPK signaling pathway)	K01103	3.1.3.46;EC:2.7.1.105
2	ENSG00000168899	VAMP5	1.53849	1.21942	0.33532	4.50898e-30	1.95843e-25	vesicle associated membrane protein 5 [Source:HGNC Symbol;Acc:HGNC:12646]	GO:0005515(protein binding);GO:0005770(late endosome);GO:0005794(Golgi apparatus);GO:0005802(trans-Golgi network);GO:0005886(plasma membrane);GO:0005887(integral component of plasma membrane);GO:0007275(multicellular organism development);GO:0007517(muscle organ development);GO:0007519(skeletal muscle tissue development);GO:0009986(cell surface);GO:0012505(endomembrane system);GO:0014704(intercal…	04130(SNARE interactions in vesicular transport)	K08514	NA
2	ENSG00000157557	ETS2	4.31417	3.6024	0.260125	6.7156e-30	2.91685e-25	ETS proto-oncogene 2, transcription factor [Source:HGNC Symbol;Acc:HGNC:3489]	GO:0000122(negative regulation of transcription by RNA polymerase II);GO:0000977(RNA polymerase II regulatory region sequence-specific DNA binding);GO:0000978(RNA polymerase II proximal promoter sequence-specific DNA binding);GO:0000981(DNA-binding transcription factor activity, RNA polymerase II-specific);GO:0001227(DNA-binding transcription repressor activity, RNA polymerase II-specific);GO:000…	04014(Ras signaling pathway);05166(Human T-cell leukemia virus 1 infection)	K21932	NA
2	ENSG00000122644	ARL4A	1.69923	1.4144	0.264692	8.60479e-30	3.7374e-25	ADP ribosylation factor like GTPase 4A [Source:HGNC Symbol;Acc:HGNC:695]	GO:0000166(nucleotide binding);GO:0005515(protein binding);GO:0005525(GTP binding);GO:0005634(nucleus);GO:0005654(nucleoplasm);GO:0005730(nucleolus);GO:0005737(cytoplasm);GO:0005829(cytosol);GO:0005886(plasma membrane);GO:0006886(intracellular protein transport);GO:0016020(membrane);GO:0016192(vesicle-mediated transport);GO:0050873(brown fat cell differentiation)	NA	K07945	NA
2	ENSG00000130775	THEMIS2	1.45367	1.2028	0.273293	9.89067e-30	4.29591e-25	thymocyte selection associated family member 2 [Source:HGNC Symbol;Acc:HGNC:16839]	GO:0002376(immune system process);GO:0005515(protein binding);GO:0005634(nucleus);GO:0005737(cytoplasm);GO:0006954(inflammatory response);GO:0007155(cell adhesion);GO:0050852(T cell receptor signaling pathway)	NA	NA	NA
2	ENSG00000134480	CCNH	1.13436	0.926663	0.291758	1.60458e-29	6.96933e-25	cyclin H [Source:HGNC Symbol;Acc:HGNC:1594]	GO:0000079(regulation of cyclin-dependent protein serine/threonine kinase activity);GO:0000082(G1/S transition of mitotic cell cycle);GO:0000086(G2/M transition of mitotic cell cycle);GO:0005515(protein binding);GO:0005634(nucleus);GO:0005654(nucleoplasm);GO:0005675(transcription factor TFIIH holo complex);GO:0006283(transcription-coupled nucleotide-excision repair);GO:0006294(nucleotide-excision…	03022(Basal transcription factors);03420(Nucleotide excision repair);04110(Cell cycle)	NA	NA
2	ENSG00000124762	CDKN1A	2.80605	2.32615	0.2706	2.39999e-29	1.04241e-24	cyclin dependent kinase inhibitor 1A [Source:HGNC Symbol;Acc:HGNC:1784]	GO:0000079(regulation of cyclin-dependent protein serine/threonine kinase activity);GO:0000082(G1/S transition of mitotic cell cycle);GO:0000086(G2/M transition of mitotic cell cycle);GO:0000307(cyclin-dependent protein kinase holoenzyme complex);GO:0004860(protein kinase inhibitor activity);GO:0004861(cyclin-dependent protein serine/threonine kinase inhibitor activity);GO:0005515(protein binding…	01522(Endocrine resistance);01524(Platinum drug resistance);04012(ErbB signaling pathway);04066(HIF-1 signaling pathway);04068(FoxO signaling pathway);04110(Cell cycle);04115(p53 signaling pathway);04151(PI3K-Akt signaling pathway);04218(Cellular senescence);04630(Jak-STAT signaling pathway);04921(Oxytocin signaling pathway);04928(Parathyroid hormone synthesis, secretion and action);04934(Cushing…	NA	NA
2	ENSG00000135334	AKIRIN2	1.18655	0.98528	0.26817	1.00551e-28	4.36735e-24	akirin 2 [Source:HGNC Symbol;Acc:HGNC:21407]	GO:0000122(negative regulation of transcription by RNA polymerase II);GO:0002376(immune system process);GO:0005515(protein binding);GO:0005634(nucleus);GO:0005654(nucleoplasm);GO:0007275(multicellular organism development);GO:0008284(positive regulation of cell population proliferation);GO:0009792(embryo development ending in birth or egg hatching);GO:0010629(negative regulation of gene expressio…	NA	NA	NA
2	ENSG00000151651	ADAM8	0.868589	0.705966	0.299074	1.19327e-28	5.18284e-24	ADAM metallopeptidase domain 8 [Source:HGNC Symbol;Acc:HGNC:215]	GO:0000902(cell morphogenesis);GO:0001525(angiogenesis);GO:0002102(podosome);GO:0002523(leukocyte migration involved in inflammatory response);GO:0002675(positive regulation of acute inflammatory response);GO:0002693(positive regulation of cellular extravasation);GO:0004222(metalloendopeptidase activity);GO:0004252(serine-type endopeptidase activity);GO:0005509(calcium ion binding);GO:0005515(pro…	NA	NA	NA
2	ENSG00000069399	BCL3	0.926053	0.751591	0.301147	1.31648e-28	5.71802e-24	BCL3, transcription coactivator [Source:HGNC Symbol;Acc:HGNC:998]	GO:0002268(follicular dendritic cell differentiation);GO:0002315(marginal zone B cell differentiation);GO:0002455(humoral immune response mediated by circulating immunoglobulin);GO:0002467(germinal center formation);GO:0003677(DNA binding);GO:0003700(DNA-binding transcription factor activity);GO:0005515(protein binding);GO:0005634(nucleus);GO:0005654(nucleoplasm);GO:0005737(cytoplasm);GO:0005829(…	04625(C-type lectin receptor signaling pathway);04668(TNF signaling pathway)	NA	NA
2	ENSG00000239948	RN7SL368P	0.692193	0.561772	0.301189	1.5877e-28	6.896e-24	RNA, 7SL, cytoplasmic 368, pseudogene [Source:HGNC Symbol;Acc:HGNC:46384]	NA	NA	NA	NA
2	ENSG00000279838	AL356273.3	0.572842	0.469761	0.286211	4.67495e-28	2.03052e-23	TEC	NA	NA	NA	NA
2	ENSG00000104312	RIPK2	1.48957	1.23253	0.273268	4.71591e-28	2.04831e-23	receptor interacting serine/threonine kinase 2 [Source:HGNC Symbol;Acc:HGNC:10020]	GO:0000165(MAPK cascade);GO:0000166(nucleotide binding);GO:0000187(activation of MAPK activity);GO:0001961(positive regulation of cytokine-mediated signaling pathway);GO:0002250(adaptive immune response);GO:0002376(immune system process);GO:0002827(positive regulation of T-helper 1 type immune response);GO:0004672(protein kinase activity);GO:0004674(protein serine/threonine kinase activity);GO:00…	04621(NOD-like receptor signaling pathway);04722(Neurotrophin signaling pathway);05131(Shigellosis);05152(Tuberculosis)	K08846	EC:2.7.11.1
2	ENSG00000130164	LDLR	1.13435	0.918189	0.305002	6.79922e-28	2.95317e-23	low density lipoprotein receptor [Source:HGNC Symbol;Acc:HGNC:6547]	GO:0001540(amyloid-beta binding);GO:0001618(virus receptor activity);GO:0002020(protease binding);GO:0005041(low-density lipoprotein particle receptor activity);GO:0005509(calcium ion binding);GO:0005515(protein binding);GO:0005623(cell);GO:0005764(lysosome);GO:0005768(endosome);GO:0005769(early endosome);GO:0005770(late endosome);GO:0005794(Golgi apparatus);GO:0005886(plasma membrane);GO:0005887…	04144(Endocytosis);04913(Ovarian steroidogenesis);04925(Aldosterone synthesis and secretion);04927(Cortisol synthesis and secretion);04934(Cushing syndrome);04976(Bile secretion);04979(Cholesterol metabolism);05145(Toxoplasmosis);05160(Hepatitis C)	K12473	NA
2	ENSG00000198959	TGM2	0.70697	0.585887	0.271027	1.81077e-27	7.86491e-23	transglutaminase 2 [Source:HGNC Symbol;Acc:HGNC:11778]	GO:0001974(blood vessel remodeling);GO:0003810(protein-glutamine gamma-glutamyltransferase activity);GO:0005515(protein binding);GO:0005525(GTP binding);GO:0005737(cytoplasm);GO:0005739(mitochondrion);GO:0005783(endoplasmic reticulum);GO:0005829(cytosol);GO:0005886(plasma membrane);GO:0005925(focal adhesion);GO:0007200(phospholipase C-activating G protein-coupled receptor signaling pathway);GO:00…	05016(Huntington disease)	K05625	EC:2.3.2.13
2	ENSG00000141298	SSH2	1.16824	0.966284	0.273822	6.89685e-27	2.99558e-22	slingshot protein phosphatase 2 [Source:HGNC Symbol;Acc:HGNC:30580]	GO:0003779(actin binding);GO:0004721(phosphoprotein phosphatase activity);GO:0004725(protein tyrosine phosphatase activity);GO:0005615(extracellular space);GO:0005737(cytoplasm);GO:0005856(cytoskeleton);GO:0006470(protein dephosphorylation);GO:0008064(regulation of actin polymerization or depolymerization);GO:0008138(protein tyrosine/serine/threonine phosphatase activity);GO:0010591(regulation of…	04360(Axon guidance);04810(Regulation of actin cytoskeleton)	K05766	3.1.3.48;EC:3.1.3.16
2	ENSG00000160888	IER2	6.19615	5.07806	0.287095	9.64232e-27	4.18804e-22	immediate early response 2 [Source:HGNC Symbol;Acc:HGNC:28871]	GO:0000977(RNA polymerase II regulatory region sequence-specific DNA binding);GO:0001228(DNA-binding transcription activator activity, RNA polymerase II-specific);GO:0003677(DNA binding);GO:0005634(nucleus);GO:0005654(nucleoplasm);GO:0005737(cytoplasm);GO:0030182(neuron differentiation);GO:0045944(positive regulation of transcription by RNA polymerase II);GO:0048870(cell motility);GO:0071774(resp…	NA	NA	NA
2	ENSG00000239911	PRKAG2-AS1	0.833551	0.68343	0.286477	9.66522e-27	4.19799e-22	PRKAG2 antisense RNA 1 [Source:HGNC Symbol;Acc:HGNC:40468]	NA	NA	NA	NA
2	ENSG00000115919	KYNU	1.58947	1.30086	0.289084	1.19486e-26	5.18978e-22	kynureninase [Source:HGNC Symbol;Acc:HGNC:6469]	GO:0003824(catalytic activity);GO:0005654(nucleoplasm);GO:0005737(cytoplasm);GO:0005739(mitochondrion);GO:0005829(cytosol);GO:0006569(tryptophan catabolic process);GO:0007568(aging);GO:0009435(NAD biosynthetic process);GO:0016787(hydrolase activity);GO:0019363(pyridine nucleotide biosynthetic process);GO:0019441(tryptophan catabolic process to kynurenine);GO:0019442(tryptophan catabolic process t…	00380(Tryptophan metabolism)	K01556	EC:3.7.1.3
2	ENSG00000103196	CRISPLD2	0.461059	0.38239	0.269907	1.51022e-26	6.55949e-22	cysteine rich secretory protein LCCL domain containing 2 [Source:HGNC Symbol;Acc:HGNC:25248]	GO:0005539(glycosaminoglycan binding);GO:0005576(extracellular region);GO:0005615(extracellular space);GO:0008201(heparin binding);GO:0030133(transport vesicle);GO:0030198(extracellular matrix organization);GO:0030324(lung development);GO:0031012(extracellular matrix);GO:0034774(secretory granule lumen);GO:0043312(neutrophil degranulation);GO:0060325(face morphogenesis);GO:0070062(extracellular e…	NA	NA	NA
2	ENSG00000279166	AC009951.1	1.41699	1.1333	0.322298	1.92895e-26	8.37818e-22	TEC	NA	NA	NA	NA
2	ENSG00000233429	HOTAIRM1	0.609974	0.503499	0.276758	2.15262e-26	9.34968e-22	HOXA transcript antisense RNA, myeloid-specific 1 [Source:HGNC Symbol;Acc:HGNC:37117]	NA	NA	NA	NA
2	ENSG00000070495	JMJD6	0.966772	0.803307	0.267225	2.30962e-26	1.00316e-21	jumonji domain containing 6, arginine demethylase and lysine hydroxylase [Source:HGNC Symbol;Acc:HGNC:19355]	GO:0001568(blood vessel development);GO:0001822(kidney development);GO:0002040(sprouting angiogenesis);GO:0003713(transcription coactivator activity);GO:0003723(RNA binding);GO:0003727(single-stranded RNA binding);GO:0005506(iron ion binding);GO:0005515(protein binding);GO:0005634(nucleus);GO:0005654(nucleoplasm);GO:0005730(nucleolus);GO:0005737(cytoplasm);GO:0005829(cytosol);GO:0005886(plasma me…	NA	K11323	EC:1.14.11.-
2	ENSG00000135049	AGTPBP1	0.652546	0.536009	0.283822	5.6858e-26	2.46957e-21	ATP/GTP binding protein 1 [Source:HGNC Symbol;Acc:HGNC:17258]	GO:0001754(eye photoreceptor cell differentiation);GO:0004180(carboxypeptidase activity);GO:0004181(metallocarboxypeptidase activity);GO:0005634(nucleus);GO:0005730(nucleolus);GO:0005737(cytoplasm);GO:0005739(mitochondrion);GO:0005829(cytosol);GO:0006508(proteolysis);GO:0007005(mitochondrion organization);GO:0007628(adult walking behavior);GO:0008233(peptidase activity);GO:0008237(metallopeptidas…	NA	NA	NA
2	ENSG00000131759	RARA	0.856287	0.709461	0.271371	6.15279e-26	2.6724e-21	retinoic acid receptor alpha [Source:HGNC Symbol;Acc:HGNC:9864]	GO:0000122(negative regulation of transcription by RNA polymerase II);GO:0000790(nuclear chromatin);GO:0000900(translation repressor activity, mRNA regulatory element binding);GO:0000976(transcription regulatory region sequence-specific DNA binding);GO:0000977(RNA polymerase II regulatory region sequence-specific DNA binding);GO:0000981(DNA-binding transcription factor activity, RNA polymerase II…	04659(Th17 cell differentiation);04915(Estrogen signaling pathway);05200(Pathways in cancer);05202(Transcriptional misregulation in cancer);05221(Acute myeloid leukemia)	K08527	NA
2	ENSG00000177663	IL17RA	1.05311	0.873476	0.26982	1.40057e-25	6.08321e-21	interleukin 17 receptor A [Source:HGNC Symbol;Acc:HGNC:5985]	GO:0005102(signaling receptor binding);GO:0005515(protein binding);GO:0005576(extracellular region);GO:0005886(plasma membrane);GO:0005887(integral component of plasma membrane);GO:0007166(cell surface receptor signaling pathway);GO:0016020(membrane);GO:0016021(integral component of membrane);GO:0030368(interleukin-17 receptor activity);GO:0032747(positive regulation of interleukin-23 production)…	04060(Cytokine-cytokine receptor interaction);04657(IL-17 signaling pathway)	K05164	NA
2	ENSG00000175857	GAPT	0.470661	0.391988	0.263879	1.91643e-25	8.32382e-21	GRB2 binding adaptor protein, transmembrane [Source:HGNC Symbol;Acc:HGNC:26588]	GO:0001782(B cell homeostasis);GO:0002322(B cell proliferation involved in immune response);GO:0002381(immunoglobulin production involved in immunoglobulin mediated immune response);GO:0005886(plasma membrane);GO:0016020(membrane);GO:0016021(integral component of membrane);GO:0042113(B cell activation)	NA	NA	NA
2	ENSG00000183486	MX2	1.03163	0.834706	0.305578	1.9484e-25	8.46266e-21	MX dynamin like GTPase 2 [Source:HGNC Symbol;Acc:HGNC:7533]	GO:0000166(nucleotide binding);GO:0000266(mitochondrial fission);GO:0002376(immune system process);GO:0003374(dynamin family protein polymerization involved in mitochondrial fission);GO:0003924(GTPase activity);GO:0005515(protein binding);GO:0005525(GTP binding);GO:0005634(nucleus);GO:0005643(nuclear pore);GO:0005737(cytoplasm);GO:0005829(cytosol);GO:0006952(defense response);GO:0008017(microtubu…	NA	NA	NA
2	ENSG00000136490	LIMD2	0.728024	0.606091	0.264452	1.33165e-24	5.78389e-20	LIM domain containing 2 [Source:HGNC Symbol;Acc:HGNC:28142]	GO:0005515(protein binding);GO:0005634(nucleus);GO:0005737(cytoplasm);GO:0046872(metal ion binding)	NA	NA	NA
[truncated: 889 more rows]
