# Supplementary material for: Single-Cell RNA-Seq Analysis Reveals Macrophages Are Involved in the Pathogenesis of Human Sporadic Acute Type A Aortic Dissection
Source: Biomolecules. 2023 Feb 20;13(2):399. doi: 10.3390/biom13020399 (PMC9952989; doi:10.3390/biom13020399)
Supplement: Supplementary file 1 [file biomolecules-13-00399-s001.zip › Table S5.xlsx]

## Sheet: Sheet1
Table S5. Number and proportion of macrophages subclusters
	0		1		2		3		4		5		Total
Clusters	Numbers	Percentage	Numbers	Percentage	Numbers	Percentage	Numbers	Percentage	Numbers	Percentage	Numbers	Percentage	Numbers	Percentage
AD1	502	0.342	534	0.3638	118	0.0804	36	0.0245	271	0.1846	7	0.0048	1468	1
AD2	376	0.2502	478	0.318	362	0.2409	218	0.145	37	0.0246	32	0.0213	1503	1
AD3	788	0.2476	892	0.2803	583	0.1832	746	0.2344	113	0.0355	60	0.0189	3182	1
AD4	338	0.2267	306	0.2052	332	0.2227	459	0.3078	51	0.0342	5	0.0034	1491	1
AD5	1330	0.2833	1331	0.2835	839	0.1787	550	0.1171	617	0.1314	28	0.006	4695	1
AD6	657	0.5073	379	0.2927	155	0.1197	30	0.0232	72	0.0556	2	0.0015	1295	1
Normal1	451	0.3568	638	0.5047	100	0.0791	0	0	71	0.0562	4	0.0032	1264	1
Normal2	42	0.2625	88	0.55	16	0.1	1	0.0062	13	0.0812	0	0	160	1
Normal3	889	0.4805	697	0.3768	197	0.1065	5	0.0027	55	0.0297	7	0.0038	1850	1
