# Supplementary material for: Single-Cell RNA-Seq Analysis Reveals Macrophages Are Involved in the Pathogenesis of Human Sporadic Acute Type A Aortic Dissection
Source: Biomolecules. 2023 Feb 20;13(2):399. doi: 10.3390/biom13020399 (PMC9952989; doi:10.3390/biom13020399)
Supplement: Supplementary file 1 [file biomolecules-13-00399-s001.zip › Table S6.xlsx]

## Sheet: Sheet1
Table S6. Number and proportion of macrophage subclusters in AD and normal groups
	AD		Normal
Subcluster	Numbers	Percentage	Numbers	Percentage
0	3991	0.2927	1382	0.4221
1	3920	0.2875	1423	0.4346
2	2389	0.1752	313	0.0956
3	2039	0.1496	6	0.0018
4	1161	0.0852	139	0.0425
5	134	0.0098	11	0.0034
Sum	13634	1	3274	1
