# Supplementary material for: Single-Cell RNA-Seq Analysis Reveals Macrophages Are Involved in the Pathogenesis of Human Sporadic Acute Type A Aortic Dissection
Source: Biomolecules. 2023 Feb 20;13(2):399. doi: 10.3390/biom13020399 (PMC9952989; doi:10.3390/biom13020399)
Supplement: Supplementary file 1 [file biomolecules-13-00399-s001.zip › Table S7.xlsx]

## Sheet: Sheet1
Table S7. Differentially expressed gene characteristics between macrophages in AD group and normal group.
GeneID	gene_id	log2FC	Pvlaue	Qvalue	pct.1	pct.2	Description	significant
ENSG00000074800	ENO1	1.59548	0	0	0.848	0.562	enolase 1 [Source:HGNC Symbol;Acc:HGNC:3350]	up
ENSG00000142634	EFHD2	1.22441	0	0	0.78	0.464	EF-hand domain family member D2 [Source:HGNC Symbol;Acc:HGNC:28670]	up
ENSG00000173372	C1QA	-3.41699	0	0	0.206	0.96	complement C1q A chain [Source:HGNC Symbol;Acc:HGNC:1241]	down
ENSG00000159189	C1QC	-2.70445	0	0	0.156	0.874	complement C1q C chain [Source:HGNC Symbol;Acc:HGNC:1245]	down
ENSG00000173369	C1QB	-2.94979	0	0	0.207	0.916	complement C1q B chain [Source:HGNC Symbol;Acc:HGNC:1242]	down
ENSG00000142669	SH3BGRL3	1.62179	0	0	0.988	0.902	SH3 domain binding glutamate rich protein like 3 [Source:HGNC Symbol;Acc:HGNC:15568]	up
ENSG00000169442	CD52	1.84467	0	0	0.497	0.081	CD52 molecule [Source:HGNC Symbol;Acc:HGNC:1804]	up
ENSG00000162511	LAPTM5	0.713889	0	0	0.956	0.915	lysosomal protein transmembrane 5 [Source:HGNC Symbol;Acc:HGNC:29612]	up
ENSG00000265972	TXNIP	-1.08391	0	0	0.738	0.934	thioredoxin interacting protein [Source:HGNC Symbol;Acc:HGNC:16952]	down
ENSG00000197747	S100A10	1.64652	0	0	0.953	0.759	S100 calcium binding protein A10 [Source:HGNC Symbol;Acc:HGNC:10487]	up
ENSG00000163191	S100A11	1.4368	0	0	0.986	0.907	S100 calcium binding protein A11 [Source:HGNC Symbol;Acc:HGNC:10488]	up
ENSG00000163220	S100A9	2.49017	0	0	0.888	0.722	S100 calcium binding protein A9 [Source:HGNC Symbol;Acc:HGNC:10499]	up
ENSG00000163221	S100A12	2.46564	0	0	0.355	0.034	S100 calcium binding protein A12 [Source:HGNC Symbol;Acc:HGNC:10489]	up
ENSG00000143546	S100A8	2.60361	0	0	0.741	0.391	S100 calcium binding protein A8 [Source:HGNC Symbol;Acc:HGNC:10498]	up
ENSG00000197956	S100A6	1.48933	0	0	0.982	0.875	S100 calcium binding protein A6 [Source:HGNC Symbol;Acc:HGNC:10496]	up
ENSG00000143162	CREG1	-0.968314	0	0	0.431	0.701	cellular repressor of E1A stimulated genes 1 [Source:HGNC Symbol;Acc:HGNC:2351]	down
ENSG00000198771	RCSD1	-0.895033	0	0	0.137	0.45	RCSD domain containing 1 [Source:HGNC Symbol;Acc:HGNC:28310]	down
ENSG00000159388	BTG2	-1.03252	0	0	0.275	0.584	BTG anti-proliferation factor 2 [Source:HGNC Symbol;Acc:HGNC:1131]	down
ENSG00000123689	G0S2	2.25965	0	0	0.51	0.127	G0/G1 switch 2 [Source:HGNC Symbol;Acc:HGNC:30229]	up
ENSG00000163041	H3F3A	0.884239	0	0	0.923	0.848	H3 histone family member 3A [Source:HGNC Symbol;Acc:HGNC:4764]	up
ENSG00000152518	ZFP36L2	-1.04861	0	0	0.595	0.856	ZFP36 ring finger protein like 2 [Source:HGNC Symbol;Acc:HGNC:1108]	down
ENSG00000211592	IGKC	-1.60884	0	0	0.141	0.496	immunoglobulin kappa constant [Source:HGNC Symbol;Acc:HGNC:5716]	down
ENSG00000125538	IL1B	1.58937	0	0	0.661	0.32	interleukin 1 beta [Source:HGNC Symbol;Acc:HGNC:5992]	up
ENSG00000019169	MARCO	1.48074	0	0	0.66	0.289	macrophage receptor with collagenous structure [Source:HGNC Symbol;Acc:HGNC:6895]	up
ENSG00000136732	GYPC	-1.56086	0	0	0.243	0.631	glycophorin C (Gerbich blood group) [Source:HGNC Symbol;Acc:HGNC:4704]	down
ENSG00000241399	CD302	-1.31113	0	0	0.202	0.683	CD302 molecule [Source:HGNC Symbol;Acc:HGNC:30843]	down
ENSG00000155657	TTN	-1.98774	0	0	0.017	0.343	titin [Source:HGNC Symbol;Acc:HGNC:12403]	down
ENSG00000138449	SLC40A1	-2.72383	0	0	0.033	0.591	solute carrier family 40 member 1 [Source:HGNC Symbol;Acc:HGNC:10909]	down
ENSG00000115414	FN1	3.00401	0	0	0.579	0.251	fibronectin 1 [Source:HGNC Symbol;Acc:HGNC:3778]	up
ENSG00000018280	SLC11A1	1.09272	0	0	0.727	0.428	solute carrier family 11 member 1 [Source:HGNC Symbol;Acc:HGNC:10907]	up
ENSG00000115009	CCL20	2.9851	0	0	0.582	0.059	C-C motif chemokine ligand 20 [Source:HGNC Symbol;Acc:HGNC:10619]	up
ENSG00000206560	ANKRD28	1.12859	0	0	0.367	0.055	ankyrin repeat domain 28 [Source:HGNC Symbol;Acc:HGNC:29024]	up
ENSG00000010327	STAB1	-1.10406	0	0	0.6	0.867	stabilin 1 [Source:HGNC Symbol;Acc:HGNC:18628]	down
ENSG00000114541	FRMD4B	-1.09535	0	0	0.219	0.586	FERM domain containing 4B [Source:HGNC Symbol;Acc:HGNC:24886]	down
ENSG00000168386	FILIP1L	-1.24773	0	0	0.139	0.483	filamin A interacting protein 1 like [Source:HGNC Symbol;Acc:HGNC:24589]	down
ENSG00000173230	GOLGB1	-1.0311	0	0	0.308	0.611	golgin B1 [Source:HGNC Symbol;Acc:HGNC:4429]	down
ENSG00000168214	RBPJ	-1.32423	0	0	0.508	0.828	recombination signal binding protein for immunoglobulin kappa J region [Source:HGNC Symbol;Acc:HGNC:5724]	down
ENSG00000169429	CXCL8	2.16646	0	0	0.722	0.429	C-X-C motif chemokine ligand 8 [Source:HGNC Symbol;Acc:HGNC:6025]	up
ENSG00000124882	EREG	2.42609	0	0	0.651	0.179	epiregulin [Source:HGNC Symbol;Acc:HGNC:3443]	up
ENSG00000118785	SPP1	4.32837	0	0	0.6	0.101	secreted phosphoprotein 1 [Source:HGNC Symbol;Acc:HGNC:11255]	up
ENSG00000138821	SLC39A8	1.34411	0	0	0.441	0.125	solute carrier family 39 member 8 [Source:HGNC Symbol;Acc:HGNC:20862]	up
ENSG00000250722	SELENOP	-3.7279	0	0	0.085	0.885	selenoprotein P [Source:HGNC Symbol;Acc:HGNC:10751]	down
ENSG00000145703	IQGAP2	-1.18375	0	0	0.19	0.568	IQ motif containing GTPase activating protein 2 [Source:HGNC Symbol;Acc:HGNC:6111]	down
ENSG00000038427	VCAN	2.99444	0	0	0.895	0.297	versican [Source:HGNC Symbol;Acc:HGNC:2464]	up
ENSG00000248323	LUCAT1	1.40975	0	0	0.653	0.249	lung cancer associated transcript 1 [Source:HGNC Symbol;Acc:HGNC:48498]	up
ENSG00000120708	TGFBI	1.34598	0	0	0.759	0.584	transforming growth factor beta induced [Source:HGNC Symbol;Acc:HGNC:11771]	up
ENSG00000120738	EGR1	-1.37852	0	0	0.334	0.736	early growth response 1 [Source:HGNC Symbol;Acc:HGNC:3238]	down
ENSG00000019582	CD74	-2.06197	0	0	0.691	0.984	CD74 molecule [Source:HGNC Symbol;Acc:HGNC:1697]	down
ENSG00000124491	F13A1	-2.30388	0	0	0.177	0.799	coagulation factor XIII A chain [Source:HGNC Symbol;Acc:HGNC:3531]	down
ENSG00000213719	CLIC1	0.866616	0	0	0.869	0.744	chloride intracellular channel 1 [Source:HGNC Symbol;Acc:HGNC:2062]	up
ENSG00000204389	HSPA1A	-0.88954	0	0	0.735	0.968	heat shock protein family A (Hsp70) member 1A [Source:HGNC Symbol;Acc:HGNC:5232]	down
ENSG00000204388	HSPA1B	-1.06356	0	0	0.585	0.897	heat shock protein family A (Hsp70) member 1B [Source:HGNC Symbol;Acc:HGNC:5233]	down
ENSG00000204287	HLA-DRA	-1.18012	0	0	0.672	0.939	major histocompatibility complex, class II, DR alpha [Source:HGNC Symbol;Acc:HGNC:4947]	down
ENSG00000179344	HLA-DQB1	-1.11411	0	0	0.199	0.547	major histocompatibility complex, class II, DQ beta 1 [Source:HGNC Symbol;Acc:HGNC:4944]	down
ENSG00000242574	HLA-DMB	-0.926711	0	0	0.102	0.417	major histocompatibility complex, class II, DM beta [Source:HGNC Symbol;Acc:HGNC:4935]	down
ENSG00000231389	HLA-DPA1	-1.46428	0	0	0.371	0.756	major histocompatibility complex, class II, DP alpha 1 [Source:HGNC Symbol;Acc:HGNC:4938]	down
ENSG00000223865	HLA-DPB1	-1.52338	0	0	0.301	0.719	major histocompatibility complex, class II, DP beta 1 [Source:HGNC Symbol;Acc:HGNC:4940]	down
ENSG00000096060	FKBP5	-1.18714	0	0	0.501	0.864	FKBP prolyl isomerase 5 [Source:HGNC Symbol;Acc:HGNC:3721]	down
ENSG00000146122	DAAM2	-0.603606	0	0	0.006	0.188	dishevelled associated activator of morphogenesis 2 [Source:HGNC Symbol;Acc:HGNC:18143]	down
ENSG00000080546	SESN1	-1.16422	0	0	0.099	0.465	sestrin 1 [Source:HGNC Symbol;Acc:HGNC:21595]	down
ENSG00000111817	DSE	1.11111	0	0	0.658	0.365	dermatan sulfate epimerase [Source:HGNC Symbol;Acc:HGNC:21144]	up
ENSG00000230202	AL450405.1	-1.02406	0	0	0.004	0.298	ribosomal protein L29 (RPL29) pseudogene	down
ENSG00000111885	MAN1A1	-1.20135	0	0	0.255	0.536	mannosidase alpha class 1A member 1 [Source:HGNC Symbol;Acc:HGNC:6821]	down
ENSG00000079819	EPB41L2	-0.884079	0	0	0.052	0.311	erythrocyte membrane protein band 4.1 like 2 [Source:HGNC Symbol;Acc:HGNC:3379]	down
ENSG00000075624	ACTB	1.36981	0	0	0.998	0.991	actin beta [Source:HGNC Symbol;Acc:HGNC:132]	up
ENSG00000048052	HDAC9	-0.73587	0	0	0.024	0.256	histone deacetylase 9 [Source:HGNC Symbol;Acc:HGNC:14065]	down
ENSG00000127951	FGL2	-1.21184	0	0	0.249	0.673	fibrinogen like 2 [Source:HGNC Symbol;Acc:HGNC:3696]	down
ENSG00000085662	AKR1B1	-1.51183	0	0	0.085	0.462	aldo-keto reductase family 1 member B [Source:HGNC Symbol;Acc:HGNC:381]	down
ENSG00000258227	CLEC5A	1.67683	0	0	0.456	0.042	C-type lectin domain containing 5A [Source:HGNC Symbol;Acc:HGNC:2054]	up
ENSG00000171659	GPR34	-1.44065	0	0	0.102	0.531	G protein-coupled receptor 34 [Source:HGNC Symbol;Acc:HGNC:4490]	down
ENSG00000102265	TIMP1	3.87733	0	0	0.957	0.6	TIMP metallopeptidase inhibitor 1 [Source:HGNC Symbol;Acc:HGNC:11820]	up
ENSG00000155659	VSIG4	-1.06611	0	0	0.595	0.883	V-set and immunoglobulin domain containing 4 [Source:HGNC Symbol;Acc:HGNC:17032]	down
ENSG00000230508	RPL19P21	0.00174934	0	0	0.001	0.001	ribosomal protein L19 pseudogene 21 [Source:HGNC Symbol;Acc:HGNC:35868]	no_diff
ENSG00000196924	FLNA	1.33325	0	0	0.698	0.322	filamin A [Source:HGNC Symbol;Acc:HGNC:3754]	up
ENSG00000147408	CSGALNACT1	-0.690731	0	0	0.015	0.226	chondroitin sulfate N-acetylgalactosaminyltransferase 1 [Source:HGNC Symbol;Acc:HGNC:24290]	down
ENSG00000164687	FABP5	2.63256	0	0	0.666	0.224	fatty acid binding protein 5 [Source:HGNC Symbol;Acc:HGNC:3560]	up
ENSG00000123124	WWP1	-0.936394	0	0	0.106	0.392	WW domain containing E3 ubiquitin protein ligase 1 [Source:HGNC Symbol;Acc:HGNC:17004]	down
ENSG00000169439	SDC2	1.42878	0	0	0.458	0.113	syndecan 2 [Source:HGNC Symbol;Acc:HGNC:10659]	up
ENSG00000070756	PABPC1	-0.799697	0	0	0.875	0.936	poly(A) binding protein cytoplasmic 1 [Source:HGNC Symbol;Acc:HGNC:8554]	down
ENSG00000147872	PLIN2	1.2078	0	0	0.809	0.601	perilipin 2 [Source:HGNC Symbol;Acc:HGNC:248]	up
ENSG00000122694	GLIPR2	1.31801	0	0	0.583	0.163	GLI pathogenesis related 2 [Source:HGNC Symbol;Acc:HGNC:18007]	up
ENSG00000135047	CTSL	2.47834	0	0	0.744	0.362	cathepsin L [Source:HGNC Symbol;Acc:HGNC:2537]	up
ENSG00000204136	GGTA1P	-1.77889	0	0	0.073	0.619	glycoprotein, alpha-galactosyltransferase 1 pseudogene [Source:HGNC Symbol;Acc:HGNC:4253]	down
ENSG00000117984	CTSD	1.29356	0	0	0.902	0.775	cathepsin D [Source:HGNC Symbol;Acc:HGNC:2529]	up
ENSG00000133800	LYVE1	-1.78077	0	0	0.247	0.772	lymphatic vessel endothelial hyaluronan receptor 1 [Source:HGNC Symbol;Acc:HGNC:14687]	down
ENSG00000134333	LDHA	1.04555	0	0	0.673	0.438	lactate dehydrogenase A [Source:HGNC Symbol;Acc:HGNC:6535]	up
ENSG00000026508	CD44	1.42235	0	0	0.867	0.554	CD44 molecule (Indian blood group) [Source:HGNC Symbol;Acc:HGNC:1681]	up
ENSG00000110077	MS4A6A	-2.06928	0	0	0.385	0.924	membrane spanning 4-domains A6A [Source:HGNC Symbol;Acc:HGNC:13375]	down
ENSG00000110079	MS4A4A	-1.47253	0	0	0.305	0.727	membrane spanning 4-domains A4A [Source:HGNC Symbol;Acc:HGNC:13371]	down
ENSG00000166927	MS4A7	-1.16245	0	0	0.542	0.808	membrane spanning 4-domains A7 [Source:HGNC Symbol;Acc:HGNC:13378]	down
ENSG00000124942	AHNAK	-1.04496	0	0	0.659	0.896	AHNAK nucleoprotein [Source:HGNC Symbol;Acc:HGNC:347]	down
ENSG00000172757	CFL1	0.60491	0	0	0.932	0.894	cofilin 1 [Source:HGNC Symbol;Acc:HGNC:1874]	up
ENSG00000165457	FOLR2	-1.73463	0	0	0.097	0.628	folate receptor beta [Source:HGNC Symbol;Acc:HGNC:3793]	down
ENSG00000084234	APLP2	0.843412	0	0	0.867	0.744	amyloid beta precursor like protein 2 [Source:HGNC Symbol;Acc:HGNC:598]	up
ENSG00000026025	VIM	1.06249	0	0	0.991	0.969	vimentin [Source:HGNC Symbol;Acc:HGNC:12692]	up
ENSG00000260314	MRC1	-2.12429	0	0	0.297	0.884	mannose receptor C-type 1 [Source:HGNC Symbol;Acc:HGNC:7228]	down
ENSG00000107968	MAP3K8	1.08803	0	0	0.703	0.439	mitogen-activated protein kinase kinase kinase 8 [Source:HGNC Symbol;Acc:HGNC:6860]	up
ENSG00000122862	SRGN	1.18551	0	0	0.972	0.94	serglycin [Source:HGNC Symbol;Acc:HGNC:9361]	up
ENSG00000156113	KCNMA1	-0.671463	0	0	0.014	0.208	potassium calcium-activated channel subfamily M alpha 1 [Source:HGNC Symbol;Acc:HGNC:6284]	down
ENSG00000148834	GSTO1	1.12659	0	0	0.747	0.462	glutathione S-transferase omega 1 [Source:HGNC Symbol;Acc:HGNC:13312]	up
ENSG00000111640	GAPDH	1.28009	0	0	0.964	0.893	glyceraldehyde-3-phosphate dehydrogenase [Source:HGNC Symbol;Acc:HGNC:4141]	up
ENSG00000010610	CD4	-0.957982	0	0	0.191	0.555	CD4 molecule [Source:HGNC Symbol;Acc:HGNC:1678]	down
ENSG00000175899	A2M	-1.62466	0	0	0.116	0.581	alpha-2-macroglobulin [Source:HGNC Symbol;Acc:HGNC:7]	down
ENSG00000111341	MGP	-1.28951	0	0	0.334	0.695	matrix Gla protein [Source:HGNC Symbol;Acc:HGNC:7060]	down
ENSG00000185432	METTL7A	-1.42909	0	0	0.17	0.669	methyltransferase like 7A [Source:HGNC Symbol;Acc:HGNC:24550]	down
ENSG00000135404	CD63	0.833307	0	0	0.92	0.859	CD63 molecule [Source:HGNC Symbol;Acc:HGNC:1692]	up
ENSG00000092841	MYL6	1.016	0	0	0.952	0.881	myosin light chain 6 [Source:HGNC Symbol;Acc:HGNC:7587]	up
ENSG00000135678	CPM	-1.84691	0	0	0.299	0.792	carboxypeptidase M [Source:HGNC Symbol;Acc:HGNC:2311]	down
ENSG00000139289	PHLDA1	2.15145	0	0	0.687	0.155	pleckstrin homology like domain family A member 1 [Source:HGNC Symbol;Acc:HGNC:8933]	up
ENSG00000017427	IGF1	-1.15174	0	0	0.026	0.327	insulin like growth factor 1 [Source:HGNC Symbol;Acc:HGNC:5464]	down
ENSG00000120694	HSPH1	-1.41206	0	0	0.519	0.867	heat shock protein family H (Hsp110) member 1 [Source:HGNC Symbol;Acc:HGNC:16969]	down
ENSG00000133112	TPT1	-0.539516	0	0	0.995	0.998	tumor protein, translationally-controlled 1 [Source:HGNC Symbol;Acc:HGNC:12022]	down
ENSG00000136167	LCP1	0.941346	0	0	0.86	0.695	lymphocyte cytosolic protein 1 [Source:HGNC Symbol;Acc:HGNC:6528]	up
ENSG00000136156	ITM2B	-0.903641	0	0	0.728	0.917	integral membrane protein 2B [Source:HGNC Symbol;Acc:HGNC:6174]	down
ENSG00000129538	RNASE1	-2.5975	0	0	0.478	0.954	ribonuclease A family member 1, pancreatic [Source:HGNC Symbol;Acc:HGNC:10044]	down
ENSG00000100644	HIF1A	1.59514	0	0	0.768	0.442	hypoxia inducible factor 1 subunit alpha [Source:HGNC Symbol;Acc:HGNC:4910]	up
ENSG00000072110	ACTN1	1.09525	0	0	0.504	0.153	actinin alpha 1 [Source:HGNC Symbol;Acc:HGNC:163]	up
ENSG00000197249	SERPINA1	1.48054	0	0	0.651	0.25	serpin family A member 1 [Source:HGNC Symbol;Acc:HGNC:8941]	up
ENSG00000080824	HSP90AA1	-1.30548	0	0	0.921	0.989	heat shock protein 90 alpha family class A member 1 [Source:HGNC Symbol;Acc:HGNC:5253]	down
ENSG00000185215	TNFAIP2	-1.01372	0	0	0.286	0.613	TNF alpha induced protein 2 [Source:HGNC Symbol;Acc:HGNC:11895]	down
ENSG00000140264	SERF2	0.703362	0	0	0.977	0.94	small EDRK-rich factor 2 [Source:HGNC Symbol;Acc:HGNC:10757]	up
ENSG00000103569	AQP9	1.77502	0	0	0.553	0.044	aquaporin 9 [Source:HGNC Symbol;Acc:HGNC:643]	up
ENSG00000182718	ANXA2	0.856504	0	0	0.863	0.725	annexin A2 [Source:HGNC Symbol;Acc:HGNC:537]	up
ENSG00000140416	TPM1	-1.10215	0	0	0.109	0.401	tropomyosin 1 [Source:HGNC Symbol;Acc:HGNC:12010]	down
ENSG00000137831	UACA	-0.93093	0	0	0.056	0.343	uveal autoantigen with coiled-coil domains and ankyrin repeats [Source:HGNC Symbol;Acc:HGNC:15947]	down
ENSG00000067225	PKM	1.67586	0	0	0.844	0.469	pyruvate kinase M1/2 [Source:HGNC Symbol;Acc:HGNC:9021]	up
ENSG00000140379	BCL2A1	1.44214	0	0	0.704	0.251	BCL2 related protein A1 [Source:HGNC Symbol;Acc:HGNC:991]	up
ENSG00000166825	ANPEP	1.44028	0	0	0.691	0.323	alanyl aminopeptidase, membrane [Source:HGNC Symbol;Acc:HGNC:500]	up
ENSG00000125148	MT2A	-1.21407	0	0	0.656	0.904	metallothionein 2A [Source:HGNC Symbol;Acc:HGNC:7406]	down
ENSG00000169715	MT1E	-1.28785	0	0	0.116	0.391	metallothionein 1E [Source:HGNC Symbol;Acc:HGNC:7397]	down
ENSG00000125144	MT1G	-1.71582	0	0	0.056	0.376	metallothionein 1G [Source:HGNC Symbol;Acc:HGNC:7399]	down
ENSG00000187193	MT1X	-1.41989	0	0	0.258	0.61	metallothionein 1X [Source:HGNC Symbol;Acc:HGNC:7405]	down
ENSG00000178573	MAF	-1.91866	0	0	0.32	0.846	MAF bZIP transcription factor [Source:HGNC Symbol;Acc:HGNC:6776]	down
ENSG00000103187	COTL1	0.885488	0	0	0.857	0.668	coactosin like F-actin binding protein 1 [Source:HGNC Symbol;Acc:HGNC:18304]	up
ENSG00000051523	CYBA	1.35596	0	0	0.937	0.756	cytochrome b-245 alpha chain [Source:HGNC Symbol;Acc:HGNC:2577]	up
ENSG00000108518	PFN1	0.781795	0	0	0.921	0.847	profilin 1 [Source:HGNC Symbol;Acc:HGNC:8881]	up
ENSG00000109099	PMP22	-1.84708	0	0	0.144	0.516	peripheral myelin protein 22 [Source:HGNC Symbol;Acc:HGNC:9118]	down
ENSG00000176974	SHMT1	-0.774444	0	0	0.024	0.248	serine hydroxymethyltransferase 1 [Source:HGNC Symbol;Acc:HGNC:10850]	down
ENSG00000108691	CCL2	2.92506	0	0	0.44	0.08	C-C motif chemokine ligand 2 [Source:HGNC Symbol;Acc:HGNC:10618]	up
ENSG00000186407	CD300E	1.86896	0	0	0.54	0.062	CD300e molecule [Source:HGNC Symbol;Acc:HGNC:28874]	up
ENSG00000141526	SLC16A3	1.08212	0	0	0.505	0.162	solute carrier family 16 member 3 [Source:HGNC Symbol;Acc:HGNC:10924]	up
ENSG00000158270	COLEC12	-1.18533	0	0	0.095	0.443	collectin subfamily member 12 [Source:HGNC Symbol;Acc:HGNC:16016]	down
ENSG00000088827	SIGLEC1	-1.11594	0	0	0.098	0.456	sialic acid binding Ig like lectin 1 [Source:HGNC Symbol;Acc:HGNC:11127]	down
ENSG00000178726	THBD	1.33157	0	0	0.644	0.288	thrombomodulin [Source:HGNC Symbol;Acc:HGNC:11784]	up
ENSG00000101439	CST3	-1.35482	0	0	0.931	0.987	cystatin C [Source:HGNC Symbol;Acc:HGNC:2475]	down
ENSG00000100979	PLTP	-2.47247	0	0	0.217	0.807	phospholipid transfer protein [Source:HGNC Symbol;Acc:HGNC:9093]	down
ENSG00000087460	GNAS	-0.709929	0	0	0.8	0.937	GNAS complex locus [Source:HGNC Symbol;Acc:HGNC:4392]	down
ENSG00000197766	CFD	-1.07691	0	0	0.369	0.698	complement factor D [Source:HGNC Symbol;Acc:HGNC:2771]	down
ENSG00000099875	MKNK2	-0.969865	0	0	0.157	0.496	MAP kinase interacting serine/threonine kinase 2 [Source:HGNC Symbol;Acc:HGNC:7111]	down
ENSG00000104904	OAZ1	0.862579	0	0	0.964	0.916	ornithine decarboxylase antizyme 1 [Source:HGNC Symbol;Acc:HGNC:8095]	up
ENSG00000132002	DNAJB1	-1.56916	0	0	0.551	0.91	DnaJ heat shock protein family (Hsp40) member B1 [Source:HGNC Symbol;Acc:HGNC:5270]	down
ENSG00000127528	KLF2	-1.16842	0	0	0.397	0.693	Kruppel like factor 2 [Source:HGNC Symbol;Acc:HGNC:6347]	down
ENSG00000142227	EMP3	1.59454	0	0	0.902	0.621	epithelial membrane protein 3 [Source:HGNC Symbol;Acc:HGNC:3335]	up
ENSG00000105609	LILRB5	-1.22061	0	0	0.055	0.375	leukocyte immunoglobulin like receptor B5 [Source:HGNC Symbol;Acc:HGNC:6609]	down
ENSG00000240972	MIF	1.40381	0	0	0.481	0.103	macrophage migration inhibitory factor [Source:HGNC Symbol;Acc:HGNC:7097]	up
ENSG00000100097	LGALS1	1.81627	0	0	0.949	0.726	galectin 1 [Source:HGNC Symbol;Acc:HGNC:6561]	up
ENSG00000025708	TYMP	1.82479	0	0	0.88	0.49	thymidine phosphorylase [Source:HGNC Symbol;Acc:HGNC:3148]	up
ENSG00000178695	KCTD12	-0.832004	0	0	0.625	0.841	potassium channel tetramerization domain containing 12 [Source:HGNC Symbol;Acc:HGNC:14678]	down
ENSG00000169756	LIMS1	1.03007	0	0	0.719	0.468	LIM zinc finger domain containing 1 [Source:HGNC Symbol;Acc:HGNC:6616]	up
ENSG00000204257	HLA-DMA	-0.895297	0	0	0.222	0.561	major histocompatibility complex, class II, DM alpha [Source:HGNC Symbol;Acc:HGNC:4934]	down
ENSG00000137491	SLCO2B1	-1.01677	0	0	0.276	0.58	solute carrier organic anion transporter family member 2B1 [Source:HGNC Symbol;Acc:HGNC:10962]	down
ENSG00000136026	CKAP4	1.00186	0	0	0.371	0.063	cytoskeleton associated protein 4 [Source:NCBI gene;Acc:10970]	up
ENSG00000048740	CELF2	-0.913319	0	0	0.383	0.694	CUGBP Elav-like family member 2 [Source:HGNC Symbol;Acc:HGNC:2550]	down
ENSG00000185043	CIB1	1.02366	0	0	0.533	0.207	calcium and integrin binding 1 [Source:HGNC Symbol;Acc:HGNC:16920]	up
ENSG00000167460	TPM4	0.915879	0	0	0.762	0.554	tropomyosin 4 [Source:HGNC Symbol;Acc:HGNC:12013]	up
ENSG00000169432	SCN9A	-0.758754	0	0	0.005	0.161	sodium voltage-gated channel alpha subunit 9 [Source:HGNC Symbol;Acc:HGNC:10597]	down
ENSG00000155962	CLIC2	-0.644049	0	2.51293e-307	0.021	0.225	chloride intracellular channel 2 [Source:HGNC Symbol;Acc:HGNC:2063]	down
ENSG00000174600	CMKLR1	-0.804153	0	3.38411e-307	0.064	0.323	chemerin chemokine-like receptor 1 [Source:HGNC Symbol;Acc:HGNC:2121]	down
ENSG00000110700	RPS13	-0.727814	0	1.34029e-305	0.866	0.95	ribosomal protein S13 [Source:HGNC Symbol;Acc:HGNC:10386]	down
ENSG00000170571	EMB	-1.00285	0	4.39482e-305	0.224	0.517	embigin [Source:HGNC Symbol;Acc:HGNC:30465]	down
ENSG00000089220	PEBP1	-0.929382	8.09471e-308	3.51586e-303	0.227	0.542	phosphatidylethanolamine binding protein 1 [Source:HGNC Symbol;Acc:HGNC:8630]	down
ENSG00000107562	CXCL12	-0.781078	1.23532e-307	5.36549e-303	0.02	0.214	C-X-C motif chemokine ligand 12 [Source:HGNC Symbol;Acc:HGNC:10672]	down
ENSG00000161970	RPL26	-0.767574	2.11186e-306	9.17266e-302	0.744	0.887	ribosomal protein L26 [Source:HGNC Symbol;Acc:HGNC:10327]	down
ENSG00000177954	RPS27	-0.731235	4.80703e-306	2.08788e-301	0.879	0.963	ribosomal protein S27 [Source:HGNC Symbol;Acc:HGNC:10416]	down
ENSG00000196735	HLA-DQA1	-0.967365	3.83552e-305	1.66592e-300	0.075	0.337	major histocompatibility complex, class II, DQ alpha 1 [Source:HGNC Symbol;Acc:HGNC:4942]	down
ENSG00000145431	PDGFC	-0.72358	5.35556e-303	2.32613e-298	0.036	0.258	platelet derived growth factor C [Source:HGNC Symbol;Acc:HGNC:8801]	down
ENSG00000169413	RNASE6	-0.899762	5.01144e-301	2.17667e-296	0.285	0.611	ribonuclease A family member k6 [Source:HGNC Symbol;Acc:HGNC:10048]	down
ENSG00000149131	SERPING1	-0.810534	2.87814e-300	1.25009e-295	0.052	0.291	serpin family G member 1 [Source:HGNC Symbol;Acc:HGNC:1228]	down
ENSG00000108688	CCL7	1.53807	2.21324e-299	9.61298e-295	0.218	0.001	C-C motif chemokine ligand 7 [Source:HGNC Symbol;Acc:HGNC:10634]	up
ENSG00000167601	AXL	-0.674164	1.09319e-296	4.74817e-292	0.017	0.198	AXL receptor tyrosine kinase [Source:HGNC Symbol;Acc:HGNC:905]	down
ENSG00000124731	TREM1	1.06785	2.10219e-296	9.13066e-292	0.412	0.107	triggering receptor expressed on myeloid cells 1 [Source:HGNC Symbol;Acc:HGNC:17760]	up
ENSG00000229807	XIST	1.2199	7.23282e-293	3.1415e-288	0.208	0	X inactive specific transcript [Source:HGNC Symbol;Acc:HGNC:12810]	up
ENSG00000179218	CALR	0.96339	1.49468e-292	6.49198e-288	0.764	0.598	calreticulin [Source:HGNC Symbol;Acc:HGNC:1455]	up
ENSG00000144381	HSPD1	-0.906622	1.73293e-292	7.52679e-288	0.583	0.798	heat shock protein family D (Hsp60) member 1 [Source:HGNC Symbol;Acc:HGNC:5261]	down
ENSG00000174944	P2RY14	-0.549876	1.85018e-292	8.03608e-288	0.001	0.131	purinergic receptor P2Y14 [Source:HGNC Symbol;Acc:HGNC:16442]	down
ENSG00000112394	SLC16A10	1.33227	2.10654e-292	9.14955e-288	0.387	0.094	solute carrier family 16 member 10 [Source:HGNC Symbol;Acc:HGNC:17027]	up
ENSG00000167779	IGFBP6	-0.75731	2.10007e-291	9.12143e-287	0.041	0.267	insulin like growth factor binding protein 6 [Source:HGNC Symbol;Acc:HGNC:5475]	down
ENSG00000143153	ATP1B1	-0.803683	2.36388e-288	1.02673e-283	0.07	0.313	ATPase Na+/K+ transporting subunit beta 1 [Source:HGNC Symbol;Acc:HGNC:804]	down
ENSG00000276085	CCL3L1	1.69229	4.70801e-287	2.04488e-282	0.549	0.27	C-C motif chemokine ligand 3 like 1 [Source:HGNC Symbol;Acc:HGNC:10628]	up
ENSG00000167604	AD000864.1	-0.956317	1.15938e-281	5.03567e-277	0.193	0.483	NFKB inhibitor delta [Source:NCBI gene;Acc:84807]	down
ENSG00000147454	SLC25A37	1.21588	3.4406e-280	1.49439e-275	0.515	0.214	solute carrier family 25 member 37 [Source:HGNC Symbol;Acc:HGNC:29786]	up
ENSG00000163492	CCDC141	-0.608794	7.02493e-279	3.05121e-274	0.002	0.134	coiled-coil domain containing 141 [Source:HGNC Symbol;Acc:HGNC:26821]	down
ENSG00000183696	UPP1	0.988055	1.71786e-278	7.46134e-274	0.616	0.327	uridine phosphorylase 1 [Source:HGNC Symbol;Acc:HGNC:12576]	up
ENSG00000133657	ATP13A3	1.03453	2.11209e-278	9.17367e-274	0.565	0.275	ATPase 13A3 [Source:HGNC Symbol;Acc:HGNC:24113]	up
ENSG00000169230	PRELID1	0.96522	4.40605e-278	1.91372e-273	0.554	0.264	PRELI domain containing 1 [Source:HGNC Symbol;Acc:HGNC:30255]	up
ENSG00000028277	POU2F2	-0.939638	4.63319e-278	2.01238e-273	0.217	0.525	POU class 2 homeobox 2 [Source:HGNC Symbol;Acc:HGNC:9213]	down
ENSG00000105246	EBI3	-0.448237	6.22909e-274	2.70554e-269	0.005	0.147	Epstein-Barr virus induced 3 [Source:HGNC Symbol;Acc:HGNC:3129]	down
ENSG00000179163	FUCA1	-0.891441	6.69859e-273	2.90946e-268	0.09	0.334	alpha-L-fucosidase 1 [Source:HGNC Symbol;Acc:HGNC:4006]	down
ENSG00000158195	WASF2	-0.812068	2.23796e-272	9.72037e-268	0.425	0.694	WAS protein family member 2 [Source:HGNC Symbol;Acc:HGNC:12733]	down
ENSG00000212907	MT-ND4L	0.920479	1.84317e-271	8.00562e-267	0.793	0.6	mitochondrially encoded NADH:ubiquinone oxidoreductase core subunit 4L [Source:HGNC Symbol;Acc:HGNC:7460]	up
ENSG00000133639	BTG1	0.929563	4.38418e-270	1.90422e-265	0.889	0.789	BTG anti-proliferation factor 1 [Source:HGNC Symbol;Acc:HGNC:1130]	up
ENSG00000110719	TCIRG1	0.93677	2.22062e-269	9.64506e-265	0.49	0.183	T cell immune regulator 1, ATPase H+ transporting V0 subunit a3 [Source:HGNC Symbol;Acc:HGNC:11647]	up
ENSG00000106991	ENG	0.990848	6.49842e-269	2.82252e-264	0.528	0.254	endoglin [Source:HGNC Symbol;Acc:HGNC:3349]	up
ENSG00000118503	TNFAIP3	0.757909	2.876e-268	1.24916e-263	0.801	0.522	TNF alpha induced protein 3 [Source:HGNC Symbol;Acc:HGNC:11896]	up
ENSG00000100300	TSPO	0.768821	4.67942e-268	2.03246e-263	0.829	0.673	translocator protein [Source:HGNC Symbol;Acc:HGNC:1158]	up
ENSG00000107551	RASSF4	-0.883667	3.65941e-266	1.58943e-261	0.228	0.516	Ras association domain family member 4 [Source:HGNC Symbol;Acc:HGNC:20793]	down
ENSG00000087116	ADAMTS2	-0.691418	4.83166e-266	2.09859e-261	0.047	0.265	ADAM metallopeptidase with thrombospondin type 1 motif 2 [Source:HGNC Symbol;Acc:HGNC:218]	down
ENSG00000075420	FNDC3B	0.992822	6.20714e-266	2.69601e-261	0.539	0.257	fibronectin type III domain containing 3B [Source:HGNC Symbol;Acc:HGNC:24670]	up
ENSG00000065809	FAM107B	1.00458	7.70377e-266	3.34605e-261	0.557	0.268	family with sequence similarity 107 member B [Source:HGNC Symbol;Acc:HGNC:23726]	up
ENSG00000143878	RHOB	-0.943381	1.38576e-264	6.0189e-260	0.494	0.734	ras homolog family member B [Source:HGNC Symbol;Acc:HGNC:668]	down
ENSG00000196154	S100A4	0.79247	1.51779e-264	6.59237e-260	0.942	0.863	S100 calcium binding protein A4 [Source:HGNC Symbol;Acc:HGNC:10494]	up
ENSG00000166920	C15orf48	1.33698	2.97965e-263	1.29418e-258	0.327	0.065	chromosome 15 open reading frame 48 [Source:HGNC Symbol;Acc:HGNC:29898]	up
ENSG00000117154	IGSF21	-0.48604	1.74711e-261	7.58841e-257	0.004	0.139	immunoglobin superfamily member 21 [Source:HGNC Symbol;Acc:HGNC:28246]	down
ENSG00000132386	SERPINF1	-0.669297	2.36045e-259	1.02524e-254	0.048	0.263	serpin family F member 1 [Source:HGNC Symbol;Acc:HGNC:8824]	down
ENSG00000240409	MTATP8P1	-0.595895	7.13421e-259	3.09867e-254	0.025	0.209	MT-ATP8 pseudogene 1 [Source:HGNC Symbol;Acc:HGNC:44571]	down
ENSG00000148180	GSN	-0.797512	8.29826e-259	3.60427e-254	0.459	0.742	gelsolin [Source:HGNC Symbol;Acc:HGNC:4620]	down
ENSG00000137312	FLOT1	0.916485	3.19513e-258	1.38777e-253	0.509	0.211	flotillin 1 [Source:HGNC Symbol;Acc:HGNC:3757]	up
ENSG00000090659	CD209	-0.725058	7.50467e-258	3.25958e-253	0.022	0.199	CD209 molecule [Source:HGNC Symbol;Acc:HGNC:1641]	down
ENSG00000091436	MAP3K20	0.979259	1.41179e-257	6.13196e-253	0.395	0.122	mitogen-activated protein kinase kinase kinase 20 [Source:HGNC Symbol;Acc:HGNC:17797]	up
ENSG00000101745	ANKRD12	-0.841034	3.73064e-255	1.62037e-250	0.469	0.715	ankyrin repeat domain 12 [Source:HGNC Symbol;Acc:HGNC:29135]	down
ENSG00000196126	HLA-DRB1	-0.879989	4.03069e-255	1.75069e-250	0.494	0.752	major histocompatibility complex, class II, DR beta 1 [Source:HGNC Symbol;Acc:HGNC:4948]	down
ENSG00000011465	DCN	-0.743645	7.4436e-255	3.23305e-250	0.113	0.378	decorin [Source:HGNC Symbol;Acc:HGNC:2705]	down
ENSG00000085117	CD82	0.909121	1.38238e-254	6.00421e-250	0.372	0.096	CD82 molecule [Source:HGNC Symbol;Acc:HGNC:6210]	up
ENSG00000137331	IER3	0.906035	4.86814e-254	2.11443e-249	0.894	0.742	immediate early response 3 [Source:HGNC Symbol;Acc:HGNC:5392]	up
ENSG00000271614	ATP2B1-AS1	1.06663	2.25141e-253	9.77878e-249	0.546	0.278	ATP2B1 antisense RNA 1 [Source:HGNC Symbol;Acc:HGNC:27883]	up
ENSG00000115594	IL1R1	0.912439	2.97737e-253	1.29319e-248	0.285	0.042	interleukin 1 receptor type 1 [Source:HGNC Symbol;Acc:HGNC:5993]	up
ENSG00000163734	CXCL3	1.29135	3.24368e-253	1.40886e-248	0.637	0.344	C-X-C motif chemokine ligand 3 [Source:HGNC Symbol;Acc:HGNC:4604]	up
ENSG00000275395	FCGBP	-1.02692	1.02175e-252	4.43789e-248	0.044	0.251	Fc fragment of IgG binding protein [Source:HGNC Symbol;Acc:HGNC:13572]	down
ENSG00000101096	NFATC2	-0.495785	2.15898e-252	9.37731e-248	0.013	0.171	nuclear factor of activated T cells 2 [Source:HGNC Symbol;Acc:HGNC:7776]	down
ENSG00000140678	ITGAX	0.941958	4.00141e-251	1.73797e-246	0.447	0.151	integrin subunit alpha X [Source:HGNC Symbol;Acc:HGNC:6152]	up
ENSG00000243449	C4orf48	0.907012	6.04936e-250	2.62748e-245	0.542	0.256	chromosome 4 open reading frame 48 [Source:HGNC Symbol;Acc:HGNC:34437]	up
ENSG00000171227	TMEM37	-0.643674	2.36902e-249	1.02896e-244	0.041	0.237	transmembrane protein 37 [Source:HGNC Symbol;Acc:HGNC:18216]	down
ENSG00000155792	DEPTOR	-0.453791	1.17231e-248	5.0918e-244	0.01	0.157	DEP domain containing MTOR interacting protein [Source:HGNC Symbol;Acc:HGNC:22953]	down
ENSG00000204592	HLA-E	-0.634616	1.80349e-248	7.83327e-244	0.801	0.914	major histocompatibility complex, class I, E [Source:HGNC Symbol;Acc:HGNC:4962]	down
ENSG00000081041	CXCL2	1.28513	4.58676e-247	1.99221e-242	0.674	0.404	C-X-C motif chemokine ligand 2 [Source:HGNC Symbol;Acc:HGNC:4603]	up
ENSG00000165092	ALDH1A1	-0.760629	6.99493e-247	3.03818e-242	0.027	0.206	aldehyde dehydrogenase 1 family member A1 [Source:HGNC Symbol;Acc:HGNC:402]	down
ENSG00000211445	GPX3	-0.76212	4.0704e-246	1.76794e-241	0.075	0.305	glutathione peroxidase 3 [Source:HGNC Symbol;Acc:HGNC:4555]	down
ENSG00000076944	STXBP2	0.998393	2.45841e-245	1.06779e-240	0.57	0.324	syntaxin binding protein 2 [Source:HGNC Symbol;Acc:HGNC:11445]	up
ENSG00000042493	CAPG	0.930968	3.47262e-243	1.5083e-238	0.567	0.266	capping actin protein, gelsolin like [Source:HGNC Symbol;Acc:HGNC:1474]	up
ENSG00000222041	CYTOR	0.883401	1.0042e-242	4.36166e-238	0.342	0.08	cytoskeleton regulator RNA [Source:HGNC Symbol;Acc:HGNC:28717]	up
ENSG00000151474	FRMD4A	-0.712448	1.70276e-238	7.39577e-234	0.071	0.286	FERM domain containing 4A [Source:HGNC Symbol;Acc:HGNC:25491]	down
ENSG00000198814	GK	0.978779	2.13885e-238	9.28988e-234	0.428	0.148	glycerol kinase [Source:HGNC Symbol;Acc:HGNC:4289]	up
ENSG00000170345	FOS	-0.73323	4.93992e-238	2.14561e-233	0.904	0.958	Fos proto-oncogene, AP-1 transcription factor subunit [Source:HGNC Symbol;Acc:HGNC:3796]	down
ENSG00000134460	IL2RA	-0.559139	6.00425e-237	2.60789e-232	0.007	0.138	interleukin 2 receptor subunit alpha [Source:HGNC Symbol;Acc:HGNC:6008]	down
ENSG00000134419	RPS15A	-0.638282	4.71358e-236	2.0473e-231	0.867	0.938	ribosomal protein S15a [Source:HGNC Symbol;Acc:HGNC:10389]	down
ENSG00000130332	LSM7	0.8781	1.15008e-235	4.99525e-231	0.427	0.156	LSM7 homolog, U6 small nuclear RNA and mRNA degradation associated [Source:HGNC Symbol;Acc:HGNC:20470]	up
ENSG00000104870	FCGRT	-0.751834	1.17928e-235	5.12211e-231	0.719	0.862	Fc fragment of IgG receptor and transporter [Source:HGNC Symbol;Acc:HGNC:3621]	down
ENSG00000077063	CTTNBP2	-0.416047	1.24344e-235	5.40074e-231	0.002	0.118	cortactin binding protein 2 [Source:HGNC Symbol;Acc:HGNC:15679]	down
ENSG00000245532	NEAT1	-0.69696	1.99042e-235	8.64519e-231	0.989	0.969	nuclear paraspeckle assembly transcript 1 [Source:HGNC Symbol;Acc:HGNC:30815]	down
ENSG00000112414	ADGRG6	-0.381455	1.07153e-234	4.65408e-230	0.002	0.116	adhesion G protein-coupled receptor G6 [Source:HGNC Symbol;Acc:HGNC:13841]	down
ENSG00000149418	ST14	0.817333	4.05604e-234	1.7617e-229	0.309	0.068	suppression of tumorigenicity 14 [Source:HGNC Symbol;Acc:HGNC:11344]	up
ENSG00000066382	MPPED2	-0.453488	6.47237e-234	2.81121e-229	0.003	0.118	metallophosphoesterase domain containing 2 [Source:HGNC Symbol;Acc:HGNC:1180]	down
ENSG00000141905	NFIC	-0.779574	8.64531e-234	3.755e-229	0.288	0.566	nuclear factor I C [Source:HGNC Symbol;Acc:HGNC:7786]	down
ENSG00000163328	GPR155	-0.611064	1.92577e-233	8.36441e-229	0.037	0.225	G protein-coupled receptor 155 [Source:HGNC Symbol;Acc:HGNC:22951]	down
ENSG00000185339	TCN2	-0.762727	2.45452e-233	1.0661e-228	0.14	0.4	transcobalamin 2 [Source:HGNC Symbol;Acc:HGNC:11653]	down
ENSG00000196628	TCF4	-0.737983	3.12233e-232	1.35615e-227	0.115	0.366	transcription factor 4 [Source:HGNC Symbol;Acc:HGNC:11634]	down
ENSG00000105835	NAMPT	0.89301	1.52965e-231	6.6439e-227	0.782	0.564	nicotinamide phosphoribosyltransferase [Source:HGNC Symbol;Acc:HGNC:30092]	up
ENSG00000072778	ACADVL	0.857285	9.84428e-230	4.27577e-225	0.486	0.205	acyl-CoA dehydrogenase very long chain [Source:HGNC Symbol;Acc:HGNC:92]	up
ENSG00000167004	PDIA3	0.837575	1.45358e-229	6.3135e-225	0.665	0.462	protein disulfide isomerase family A member 3 [Source:HGNC Symbol;Acc:HGNC:4606]	up
ENSG00000198258	UBL5	0.746909	1.65317e-229	7.18036e-225	0.728	0.522	ubiquitin like 5 [Source:HGNC Symbol;Acc:HGNC:13736]	up
ENSG00000145416	MARCH1	-0.781867	5.79805e-229	2.51833e-224	0.243	0.53	membrane associated ring-CH-type finger 1 [Source:HGNC Symbol;Acc:HGNC:26077]	down
ENSG00000122406	RPL5	-0.60857	8.18493e-229	3.55504e-224	0.823	0.916	ribosomal protein L5 [Source:HGNC Symbol;Acc:HGNC:10360]	down
ENSG00000136160	EDNRB	0.784423	3.50355e-228	1.52173e-223	0.244	0.03	endothelin receptor type B [Source:HGNC Symbol;Acc:HGNC:3180]	up
ENSG00000105711	SCN1B	-0.610097	2.50769e-227	1.08919e-222	0.038	0.224	sodium voltage-gated channel beta subunit 1 [Source:HGNC Symbol;Acc:HGNC:10586]	down
ENSG00000149591	TAGLN	-0.975246	5.12135e-227	2.22441e-222	0.162	0.374	transgelin [Source:HGNC Symbol;Acc:HGNC:11553]	down
ENSG00000180879	SSR4	0.768064	1.16383e-226	5.055e-222	0.695	0.508	signal sequence receptor subunit 4 [Source:HGNC Symbol;Acc:HGNC:11326]	up
ENSG00000171657	GPR82	-0.458774	3.39725e-226	1.47556e-221	0.009	0.141	G protein-coupled receptor 82 [Source:HGNC Symbol;Acc:HGNC:4533]	down
ENSG00000198585	NUDT16	-0.726647	4.91129e-226	2.13317e-221	0.155	0.414	nudix hydrolase 16 [Source:HGNC Symbol;Acc:HGNC:26442]	down
ENSG00000135046	ANXA1	0.692186	5.91892e-226	2.57083e-221	0.868	0.756	annexin A1 [Source:HGNC Symbol;Acc:HGNC:533]	up
ENSG00000136286	MYO1G	0.856649	1.44272e-224	6.2663e-220	0.359	0.103	myosin IG [Source:HGNC Symbol;Acc:HGNC:13880]	up
ENSG00000258860	AL133163.2	0.7638	6.44058e-224	2.7974e-219	0.195	0.009	novel transcript	up
ENSG00000126264	HCST	0.852963	3.17778e-223	1.38024e-218	0.703	0.48	hematopoietic cell signal transducer [Source:HGNC Symbol;Acc:HGNC:16977]	up
ENSG00000197632	SERPINB2	1.24237	4.80492e-223	2.08697e-218	0.179	0.004	serpin family B member 2 [Source:HGNC Symbol;Acc:HGNC:8584]	up
ENSG00000004799	PDK4	-1.10769	5.22636e-223	2.27002e-218	0.339	0.542	pyruvate dehydrogenase kinase 4 [Source:HGNC Symbol;Acc:HGNC:8812]	down
ENSG00000146409	SLC18B1	-0.524625	1.41905e-222	6.16349e-218	0.023	0.186	solute carrier family 18 member B1 [Source:HGNC Symbol;Acc:HGNC:21573]	down
ENSG00000197958	RPL12	-0.584502	4.9095e-221	2.13239e-216	0.938	0.97	ribosomal protein L12 [Source:HGNC Symbol;Acc:HGNC:10302]	down
ENSG00000177606	JUN	-0.667442	1.25658e-220	5.45782e-216	0.788	0.939	Jun proto-oncogene, AP-1 transcription factor subunit [Source:HGNC Symbol;Acc:HGNC:6204]	down
ENSG00000145592	RPL37	-0.536527	9.11213e-220	3.95776e-215	0.942	0.969	ribosomal protein L37 [Source:HGNC Symbol;Acc:HGNC:10347]	down
ENSG00000183019	MCEMP1	0.880612	2.29695e-219	9.97656e-215	0.223	0.022	mast cell expressed membrane protein 1 [Source:HGNC Symbol;Acc:HGNC:27291]	up
ENSG00000115091	ACTR3	0.729142	9.14818e-219	3.97342e-214	0.702	0.511	ARP3 actin related protein 3 homolog [Source:HGNC Symbol;Acc:HGNC:170]	up
ENSG00000086061	DNAJA1	-0.723899	2.85556e-218	1.24028e-213	0.609	0.807	DnaJ heat shock protein family (Hsp40) member A1 [Source:HGNC Symbol;Acc:HGNC:5229]	down
ENSG00000153071	DAB2	-0.860137	3.74293e-218	1.62571e-213	0.48	0.686	DAB2, clathrin adaptor protein [Source:HGNC Symbol;Acc:HGNC:2662]	down
ENSG00000167553	TUBA1C	0.866698	4.9318e-218	2.14208e-213	0.575	0.342	tubulin alpha 1c [Source:HGNC Symbol;Acc:HGNC:20768]	up
ENSG00000224397	SMIM25	0.894292	1.16139e-217	5.04439e-213	0.422	0.151	small integral membrane protein 25 [Source:HGNC Symbol;Acc:HGNC:50328]	up
ENSG00000084070	SMAP2	-0.701748	8.08563e-217	3.51191e-212	0.485	0.728	small ArfGAP2 [Source:HGNC Symbol;Acc:HGNC:25082]	down
ENSG00000184009	ACTG1	0.603243	6.31324e-216	2.74209e-211	0.927	0.899	actin gamma 1 [Source:HGNC Symbol;Acc:HGNC:144]	up
ENSG00000072694	FCGR2B	-0.764203	8.02211e-215	3.48432e-210	0.076	0.294	Fc fragment of IgG receptor IIb [Source:HGNC Symbol;Acc:HGNC:3618]	down
ENSG00000162599	NFIA	-0.627534	1.26443e-214	5.49191e-210	0.05	0.241	nuclear factor I A [Source:HGNC Symbol;Acc:HGNC:7784]	down
ENSG00000132514	CLEC10A	-0.698233	1.53534e-214	6.6686e-210	0.05	0.244	C-type lectin domain containing 10A [Source:HGNC Symbol;Acc:HGNC:16916]	down
ENSG00000079215	SLC1A3	-0.742813	2.18946e-212	9.50969e-208	0.225	0.5	solute carrier family 1 member 3 [Source:HGNC Symbol;Acc:HGNC:10941]	down
ENSG00000131724	IL13RA1	-0.746976	2.40671e-212	1.04533e-207	0.385	0.623	interleukin 13 receptor subunit alpha 1 [Source:HGNC Symbol;Acc:HGNC:5974]	down
ENSG00000229391	HLA-DRB6	-0.754876	7.51289e-212	3.26315e-207	0.211	0.487	major histocompatibility complex, class II, DR beta 6 (pseudogene) [Source:HGNC Symbol;Acc:HGNC:4954]	down
ENSG00000239697	TNFSF12	-0.61812	1.62336e-210	7.05089e-206	0.085	0.301	TNF superfamily member 12 [Source:HGNC Symbol;Acc:HGNC:11927]	down
ENSG00000282608	ADORA3	-0.545829	1.39383e-209	6.05395e-205	0.04	0.219	adenosine A3 receptor [Source:HGNC Symbol;Acc:HGNC:268]	down
ENSG00000214787	MS4A4E	-0.407598	2.08437e-209	9.05324e-205	0.006	0.126	membrane spanning 4-domains A4E [Source:HGNC Symbol;Acc:HGNC:14284]	down
ENSG00000132507	EIF5A	0.837754	2.80464e-209	1.21817e-204	0.529	0.305	eukaryotic translation initiation factor 5A [Source:HGNC Symbol;Acc:HGNC:3300]	up
ENSG00000179144	GIMAP7	-0.64726	2.46064e-208	1.06876e-203	0.075	0.284	GTPase, IMAP family member 7 [Source:HGNC Symbol;Acc:HGNC:22404]	down
ENSG00000166598	HSP90B1	0.860725	4.00459e-208	1.73935e-203	0.752	0.662	heat shock protein 90 beta family member 1 [Source:HGNC Symbol;Acc:HGNC:12028]	up
ENSG00000285437	POLR2J3.1	-0.777692	8.17863e-208	3.55231e-203	0.189	0.435	RNA polymerase II subunit J3 [Source:HGNC Symbol;Acc:HGNC:33853]	down
ENSG00000112306	RPS12	-0.519241	1.14519e-207	4.97402e-203	0.933	0.98	ribosomal protein S12 [Source:HGNC Symbol;Acc:HGNC:10385]	down
ENSG00000167996	FTH1	0.798769	2.84747e-207	1.23677e-202	0.997	0.998	ferritin heavy chain 1 [Source:HGNC Symbol;Acc:HGNC:3976]	up
ENSG00000123342	MMP19	0.895988	5.63225e-207	2.44631e-202	0.369	0.113	matrix metallopeptidase 19 [Source:HGNC Symbol;Acc:HGNC:7165]	up
ENSG00000106565	TMEM176B	-0.884684	1.17008e-206	5.08212e-202	0.139	0.378	transmembrane protein 176B [Source:HGNC Symbol;Acc:HGNC:29596]	down
ENSG00000165072	MAMDC2	-0.497052	1.50081e-206	6.5186e-202	0.004	0.113	MAM domain containing 2 [Source:HGNC Symbol;Acc:HGNC:23673]	down
ENSG00000166794	PPIB	0.77255	7.21503e-206	3.13378e-201	0.664	0.471	peptidylprolyl isomerase B [Source:HGNC Symbol;Acc:HGNC:9255]	up
ENSG00000180353	HCLS1	-0.654831	1.12829e-204	4.90062e-200	0.625	0.799	hematopoietic cell-specific Lyn substrate 1 [Source:HGNC Symbol;Acc:HGNC:4844]	down
ENSG00000081189	MEF2C	-0.699336	1.28827e-204	5.59548e-200	0.347	0.626	myocyte enhancer factor 2C [Source:HGNC Symbol;Acc:HGNC:6996]	down
ENSG00000150782	IL18	-0.753946	1.79713e-204	7.80567e-200	0.242	0.496	interleukin 18 [Source:HGNC Symbol;Acc:HGNC:5986]	down
ENSG00000183864	TOB2	-0.738001	3.3655e-204	1.46177e-199	0.167	0.408	transducer of ERBB2, 2 [Source:HGNC Symbol;Acc:HGNC:11980]	down
ENSG00000042753	AP2S1	0.684436	3.4021e-204	1.47767e-199	0.758	0.628	adaptor related protein complex 2 subunit sigma 1 [Source:HGNC Symbol;Acc:HGNC:565]	up
ENSG00000011600	TYROBP	0.437862	4.41468e-204	1.91747e-199	0.974	0.962	TYRO protein tyrosine kinase binding protein [Source:HGNC Symbol;Acc:HGNC:12449]	up
ENSG00000106211	HSPB1	-0.836624	6.08075e-204	2.64111e-199	0.402	0.64	heat shock protein family B (small) member 1 [Source:HGNC Symbol;Acc:HGNC:5246]	down
ENSG00000177575	CD163	-0.368507	2.07354e-203	9.00621e-199	0.874	0.96	CD163 molecule [Source:HGNC Symbol;Acc:HGNC:1631]	down
ENSG00000168546	GFRA2	-0.479081	4.77594e-203	2.07438e-198	0.02	0.166	GDNF family receptor alpha 2 [Source:HGNC Symbol;Acc:HGNC:4244]	down
ENSG00000156508	EEF1A1	-0.428195	2.35412e-202	1.02249e-197	0.987	0.992	eukaryotic translation elongation factor 1 alpha 1 [Source:HGNC Symbol;Acc:HGNC:3189]	down
ENSG00000044574	HSPA5	1.00922	3.6394e-202	1.58074e-197	0.664	0.507	heat shock protein family A (Hsp70) member 5 [Source:HGNC Symbol;Acc:HGNC:5238]	up
ENSG00000150093	ITGB1	0.767737	7.26232e-202	3.15432e-197	0.638	0.47	integrin subunit beta 1 [Source:HGNC Symbol;Acc:HGNC:6153]	up
ENSG00000100311	PDGFB	-0.46175	9.44489e-202	4.10229e-197	0.011	0.138	platelet derived growth factor subunit B [Source:HGNC Symbol;Acc:HGNC:8800]	down
ENSG00000114796	KLHL24	-0.699702	1.08833e-201	4.72703e-197	0.118	0.347	kelch like family member 24 [Source:HGNC Symbol;Acc:HGNC:25947]	down
ENSG00000151491	EPS8	-0.709901	2.39104e-201	1.03853e-196	0.178	0.429	epidermal growth factor receptor pathway substrate 8 [Source:HGNC Symbol;Acc:HGNC:3420]	down
ENSG00000107796	ACTA2	-0.746552	3.0004e-201	1.3032e-196	0.06	0.243	actin, alpha 2, smooth muscle, aorta [Source:HGNC Symbol;Acc:HGNC:130]	down
ENSG00000171051	FPR1	0.862379	7.10381e-200	3.08547e-195	0.58	0.341	formyl peptide receptor 1 [Source:HGNC Symbol;Acc:HGNC:3826]	up
ENSG00000170275	CRTAP	-0.714244	2.25084e-199	9.77632e-195	0.278	0.536	cartilage associated protein [Source:HGNC Symbol;Acc:HGNC:2379]	down
ENSG00000205726	ITSN1	-0.701932	1.52999e-198	6.64538e-194	0.118	0.345	intersectin 1 [Source:HGNC Symbol;Acc:HGNC:6183]	down
ENSG00000213853	EMP2	-0.436695	2.20248e-197	9.56624e-193	0.013	0.142	epithelial membrane protein 2 [Source:HGNC Symbol;Acc:HGNC:3334]	down
ENSG00000120709	FAM53C	-0.742199	1.65261e-196	7.17796e-192	0.197	0.447	family with sequence similarity 53 member C [Source:HGNC Symbol;Acc:HGNC:1336]	down
ENSG00000106952	TNFSF8	0.746856	4.31712e-195	1.8751e-190	0.225	0.034	TNF superfamily member 8 [Source:HGNC Symbol;Acc:HGNC:11938]	up
ENSG00000090621	PABPC4	-0.700808	9.28107e-195	4.03114e-190	0.46	0.678	poly(A) binding protein cytoplasmic 4 [Source:HGNC Symbol;Acc:HGNC:8557]	down
ENSG00000214063	TSPAN4	-0.70659	1.22322e-194	5.31296e-190	0.137	0.361	tetraspanin 4 [Source:HGNC Symbol;Acc:HGNC:11859]	down
ENSG00000116729	WLS	-0.629741	1.68227e-194	7.30677e-190	0.053	0.23	Wnt ligand secretion mediator [Source:HGNC Symbol;Acc:HGNC:30238]	down
ENSG00000183688	RFLNB	0.719957	3.03104e-194	1.3165e-189	0.239	0.037	refilin B [Source:HGNC Symbol;Acc:HGNC:28705]	up
ENSG00000163735	CXCL5	1.9137	4.73566e-192	2.05689e-187	0.164	0.006	C-X-C motif chemokine ligand 5 [Source:HGNC Symbol;Acc:HGNC:10642]	up
ENSG00000117410	ATP6V0B	0.630964	8.64449e-192	3.75465e-187	0.772	0.655	ATPase H+ transporting V0 subunit b [Source:HGNC Symbol;Acc:HGNC:861]	up
ENSG00000144674	GOLGA4	-0.749111	1.16064e-191	5.04114e-187	0.347	0.595	golgin A4 [Source:HGNC Symbol;Acc:HGNC:4427]	down
ENSG00000105669	COPE	0.73391	1.42235e-191	6.17785e-187	0.605	0.373	coatomer protein complex subunit epsilon [Source:HGNC Symbol;Acc:HGNC:2234]	up
ENSG00000140836	ZFHX3	-0.739134	1.48312e-191	6.44179e-187	0.311	0.571	zinc finger homeobox 3 [Source:HGNC Symbol;Acc:HGNC:777]	down
ENSG00000111328	CDK2AP1	-0.679265	1.58143e-190	6.86879e-186	0.163	0.384	cyclin dependent kinase 2 associated protein 1 [Source:HGNC Symbol;Acc:HGNC:14002]	down
ENSG00000136842	TMOD1	-0.359017	2.92709e-190	1.27135e-185	0.006	0.116	tropomodulin 1 [Source:HGNC Symbol;Acc:HGNC:11871]	down
ENSG00000277791	PSMB3	0.763399	4.60135e-190	1.99855e-185	0.554	0.313	proteasome subunit beta 3 [Source:HGNC Symbol;Acc:HGNC:9540]	up
ENSG00000130592	LSP1	0.866193	1.10027e-188	4.77893e-184	0.368	0.132	lymphocyte specific protein 1 [Source:HGNC Symbol;Acc:HGNC:6707]	up
ENSG00000134028	ADAMDEC1	-0.439757	1.9228e-188	8.35149e-184	0.006	0.114	ADAM like decysin 1 [Source:HGNC Symbol;Acc:HGNC:16299]	down
ENSG00000148483	TMEM236	-0.419462	4.71193e-188	2.04658e-183	0.012	0.134	transmembrane protein 236 [Source:HGNC Symbol;Acc:HGNC:23473]	down
ENSG00000051108	HERPUD1	-0.70438	5.07147e-188	2.20274e-183	0.502	0.723	homocysteine inducible ER protein with ubiquitin like domain 1 [Source:HGNC Symbol;Acc:HGNC:13744]	down
ENSG00000151240	DIP2C	-0.369584	9.74097e-188	4.23089e-183	0.004	0.103	disco interacting protein 2 homolog C [Source:HGNC Symbol;Acc:HGNC:29150]	down
ENSG00000197061	HIST1H4C	-0.69259	2.65855e-187	1.15471e-182	0.135	0.339	histone cluster 1 H4 family member c [Source:HGNC Symbol;Acc:HGNC:4787]	down
ENSG00000071082	RPL31	-0.596249	5.58907e-186	2.42756e-181	0.679	0.802	ribosomal protein L31 [Source:HGNC Symbol;Acc:HGNC:10334]	down
ENSG00000245910	SNHG6	-0.684109	8.05251e-184	3.49753e-179	0.375	0.59	small nucleolar RNA host gene 6 [Source:HGNC Symbol;Acc:HGNC:32965]	down
ENSG00000123983	ACSL3	0.850073	1.84065e-183	7.99467e-179	0.476	0.259	acyl-CoA synthetase long chain family member 3 [Source:HGNC Symbol;Acc:HGNC:3570]	up
ENSG00000136068	FLNB	0.645487	4.40509e-183	1.91331e-178	0.221	0.031	filamin B [Source:HGNC Symbol;Acc:HGNC:3755]	up
ENSG00000130203	APOE	-0.597173	7.1043e-183	3.08568e-178	0.181	0.409	apolipoprotein E [Source:HGNC Symbol;Acc:HGNC:613]	down
ENSG00000109475	RPL34	-0.49267	7.95843e-183	3.45666e-178	0.935	0.968	ribosomal protein L34 [Source:HGNC Symbol;Acc:HGNC:10340]	down
ENSG00000102144	PGK1	0.737278	1.27698e-181	5.54645e-177	0.632	0.478	phosphoglycerate kinase 1 [Source:HGNC Symbol;Acc:HGNC:8896]	up
ENSG00000159128	IFNGR2	0.744004	1.86606e-181	8.10503e-177	0.595	0.394	interferon gamma receptor 2 [Source:HGNC Symbol;Acc:HGNC:5440]	up
ENSG00000149212	SESN3	-0.589735	2.06966e-181	8.98937e-177	0.068	0.254	sestrin 3 [Source:HGNC Symbol;Acc:HGNC:23060]	down
ENSG00000070961	ATP2B1	0.8381	6.42689e-181	2.79145e-176	0.602	0.425	ATPase plasma membrane Ca2+ transporting 1 [Source:HGNC Symbol;Acc:HGNC:814]	up
ENSG00000085832	EPS15	-0.673842	7.12185e-181	3.0933e-176	0.232	0.478	epidermal growth factor receptor pathway substrate 15 [Source:HGNC Symbol;Acc:HGNC:3419]	down
ENSG00000280222	AL365209.1	-0.316416	2.86275e-179	1.24341e-174	0.001	0.083	TEC	no_diff
ENSG00000123358	NR4A1	-0.742937	8.63128e-179	3.74891e-174	0.425	0.637	nuclear receptor subfamily 4 group A member 1 [Source:HGNC Symbol;Acc:HGNC:7980]	down
ENSG00000151247	EIF4E	0.879579	6.60688e-178	2.86963e-173	0.476	0.228	eukaryotic translation initiation factor 4E [Source:HGNC Symbol;Acc:HGNC:3287]	up
ENSG00000109971	HSPA8	-0.643057	1.29822e-177	5.63869e-173	0.618	0.821	heat shock protein family A (Hsp70) member 8 [Source:HGNC Symbol;Acc:HGNC:5241]	down
ENSG00000162772	ATF3	-0.767227	2.78519e-177	1.20972e-172	0.538	0.695	activating transcription factor 3 [Source:HGNC Symbol;Acc:HGNC:785]	down
ENSG00000100292	HMOX1	0.786857	3.82568e-177	1.66164e-172	0.58	0.617	heme oxygenase 1 [Source:HGNC Symbol;Acc:HGNC:5013]	up
ENSG00000198502	HLA-DRB5	-0.830491	1.51747e-176	6.59097e-172	0.436	0.517	major histocompatibility complex, class II, DR beta 5 [Source:HGNC Symbol;Acc:HGNC:4953]	down
ENSG00000093072	ADA2	-0.654113	3.46665e-176	1.5057e-171	0.209	0.45	adenosine deaminase 2 [Source:HGNC Symbol;Acc:HGNC:1839]	down
ENSG00000151651	ADAM8	0.638745	1.79138e-175	7.78067e-171	0.224	0.038	ADAM metallopeptidase domain 8 [Source:HGNC Symbol;Acc:HGNC:215]	up
ENSG00000100906	NFKBIA	0.72383	5.40449e-175	2.34739e-170	0.925	0.838	NFKB inhibitor alpha [Source:HGNC Symbol;Acc:HGNC:7797]	up
ENSG00000127914	AKAP9	-0.720153	1.11737e-174	4.85317e-170	0.267	0.507	A-kinase anchoring protein 9 [Source:HGNC Symbol;Acc:HGNC:379]	down
ENSG00000196923	PDLIM7	0.682303	1.67541e-174	7.27699e-170	0.239	0.046	PDZ and LIM domain 7 [Source:HGNC Symbol;Acc:HGNC:22958]	up
ENSG00000004399	PLXND1	-0.709273	1.91142e-174	8.30206e-170	0.273	0.507	plexin D1 [Source:HGNC Symbol;Acc:HGNC:9107]	down
ENSG00000063046	EIF4B	-0.659932	1.4439e-171	6.27145e-167	0.424	0.633	eukaryotic translation initiation factor 4B [Source:HGNC Symbol;Acc:HGNC:3285]	down
ENSG00000179271	GADD45GIP1	0.748693	2.48536e-171	1.07949e-166	0.477	0.259	GADD45G interacting protein 1 [Source:HGNC Symbol;Acc:HGNC:29996]	up
ENSG00000136830	FAM129B	0.661381	1.15263e-170	5.00632e-166	0.292	0.08	family with sequence similarity 129 member B [Source:HGNC Symbol;Acc:HGNC:25282]	up
ENSG00000054148	PHPT1	0.769976	1.15551e-170	5.01886e-166	0.49	0.269	phosphohistidine phosphatase 1 [Source:HGNC Symbol;Acc:HGNC:30033]	up
ENSG00000169100	SLC25A6	-0.584506	4.36045e-170	1.89392e-165	0.632	0.764	solute carrier family 25 member 6 [Source:HGNC Symbol;Acc:HGNC:10992]	down
ENSG00000176597	B3GNT5	0.812999	5.78684e-170	2.51346e-165	0.411	0.177	UDP-GlcNAc:betaGal beta-1,3-N-acetylglucosaminyltransferase 5 [Source:HGNC Symbol;Acc:HGNC:15684]	up
ENSG00000135218	CD36	0.896084	7.51585e-170	3.26443e-165	0.494	0.241	CD36 molecule [Source:HGNC Symbol;Acc:HGNC:1663]	up
ENSG00000250461	AC122718.1	-0.58254	7.56295e-170	3.28489e-165	0.058	0.227	family with sequence similarity 133, member B (FAM133B) pseudogene	down
ENSG00000108179	PPIF	0.911361	1.48555e-169	6.45236e-165	0.409	0.199	peptidylprolyl isomerase F [Source:HGNC Symbol;Acc:HGNC:9259]	up
ENSG00000183087	GAS6	-0.567587	1.20286e-168	5.2245e-164	0.06	0.235	growth arrest specific 6 [Source:HGNC Symbol;Acc:HGNC:4168]	down
ENSG00000073849	ST6GAL1	-0.479066	1.82035e-168	7.9065e-164	0.042	0.199	ST6 beta-galactoside alpha-2,6-sialyltransferase 1 [Source:HGNC Symbol;Acc:HGNC:10860]	down
ENSG00000267519	AC020916.1	-0.750732	2.62711e-168	1.14106e-163	0.555	0.719	novel transcript	down
ENSG00000239672	NME1	0.73038	3.15951e-168	1.3723e-163	0.303	0.098	NME/NM23 nucleoside diphosphate kinase 1 [Source:HGNC Symbol;Acc:HGNC:7849]	up
ENSG00000106803	SEC61B	0.669858	3.19094e-168	1.38595e-163	0.651	0.467	Sec61 translocon beta subunit [Source:HGNC Symbol;Acc:HGNC:16993]	up
ENSG00000104408	EIF3E	-0.649588	5.75949e-168	2.50158e-163	0.386	0.585	eukaryotic translation initiation factor 3 subunit E [Source:HGNC Symbol;Acc:HGNC:3277]	down
ENSG00000198786	MT-ND5	0.586533	1.33823e-166	5.81249e-162	0.963	0.916	mitochondrially encoded NADH:ubiquinone oxidoreductase core subunit 5 [Source:HGNC Symbol;Acc:HGNC:7461]	up
ENSG00000164111	ANXA5	0.512634	1.97862e-166	8.59393e-162	0.856	0.816	annexin A5 [Source:HGNC Symbol;Acc:HGNC:543]	up
ENSG00000138061	CYP1B1	1.12597	5.85069e-166	2.54119e-161	0.395	0.199	cytochrome P450 family 1 subfamily B member 1 [Source:HGNC Symbol;Acc:HGNC:2597]	up
ENSG00000186468	RPS23	-0.50535	1.97368e-165	8.57246e-161	0.908	0.96	ribosomal protein S23 [Source:HGNC Symbol;Acc:HGNC:10410]	down
ENSG00000248527	MTATP6P1	0.679112	2.90356e-165	1.26113e-160	0.806	0.727	MT-ATP6 pseudogene 1 [Source:HGNC Symbol;Acc:HGNC:44575]	up
ENSG00000166278	C2	-0.69941	3.24471e-165	1.40931e-160	0.069	0.242	complement C2 [Source:HGNC Symbol;Acc:HGNC:1248]	down
ENSG00000156482	RPL30	-0.521722	1.20953e-164	5.25348e-160	0.905	0.965	ribosomal protein L30 [Source:HGNC Symbol;Acc:HGNC:10333]	down
ENSG00000174695	TMEM167A	0.725721	1.44404e-164	6.27204e-160	0.495	0.29	transmembrane protein 167A [Source:HGNC Symbol;Acc:HGNC:28330]	up
ENSG00000196141	SPATS2L	-0.670473	2.90898e-164	1.26349e-159	0.119	0.301	spermatogenesis associated serine rich 2 like [Source:HGNC Symbol;Acc:HGNC:24574]	down
ENSG00000153234	NR4A2	-0.703448	3.35187e-163	1.45585e-158	0.628	0.747	nuclear receptor subfamily 4 group A member 2 [Source:HGNC Symbol;Acc:HGNC:7981]	down
ENSG00000173193	PARP14	-0.653247	2.46867e-162	1.07224e-157	0.218	0.445	poly(ADP-ribose) polymerase family member 14 [Source:HGNC Symbol;Acc:HGNC:29232]	down
ENSG00000165029	ABCA1	-0.713183	3.51962e-162	1.52871e-157	0.355	0.58	ATP binding cassette subfamily A member 1 [Source:HGNC Symbol;Acc:HGNC:29]	down
ENSG00000160213	CSTB	0.762187	6.68722e-162	2.90453e-157	0.725	0.637	cystatin B [Source:HGNC Symbol;Acc:HGNC:2482]	up
ENSG00000157551	KCNJ15	0.448193	9.20512e-162	3.99815e-157	0.126	0.001	potassium voltage-gated channel subfamily J member 15 [Source:HGNC Symbol;Acc:HGNC:6261]	up
ENSG00000165140	FBP1	0.944649	3.82681e-161	1.66214e-156	0.351	0.159	fructose-bisphosphatase 1 [Source:HGNC Symbol;Acc:HGNC:3606]	up
ENSG00000125912	NCLN	0.62536	1.14876e-160	4.98952e-156	0.249	0.059	nicalin [Source:HGNC Symbol;Acc:HGNC:26923]	up
ENSG00000146192	FGD2	-0.51987	2.255e-160	9.79438e-156	0.082	0.268	FYVE, RhoGEF and PH domain containing 2 [Source:HGNC Symbol;Acc:HGNC:3664]	down
ENSG00000111912	NCOA7	-0.519878	1.57831e-159	6.85522e-155	0.069	0.243	nuclear receptor coactivator 7 [Source:HGNC Symbol;Acc:HGNC:21081]	down
ENSG00000141447	OSBPL1A	-0.56061	2.89708e-159	1.25832e-154	0.069	0.241	oxysterol binding protein like 1A [Source:HGNC Symbol;Acc:HGNC:16398]	down
ENSG00000181381	DDX60L	0.755192	3.30845e-159	1.43699e-154	0.397	0.185	DExD/H-box 60 like [Source:HGNC Symbol;Acc:HGNC:26429]	up
ENSG00000111669	TPI1	0.645813	1.49486e-158	6.49278e-154	0.725	0.624	triosephosphate isomerase 1 [Source:HGNC Symbol;Acc:HGNC:12009]	up
ENSG00000115541	HSPE1	-0.65119	1.63193e-158	7.08813e-154	0.513	0.715	heat shock protein family E (Hsp10) member 1 [Source:HGNC Symbol;Acc:HGNC:5269]	down
ENSG00000128228	SDF2L1	0.810358	3.17401e-158	1.3786e-153	0.394	0.171	stromal cell derived factor 2 like 1 [Source:HGNC Symbol;Acc:HGNC:10676]	up
ENSG00000085265	FCN1	1.07816	6.37961e-158	2.77092e-153	0.402	0.192	ficolin 1 [Source:HGNC Symbol;Acc:HGNC:3623]	up
ENSG00000105373	NOP53	-0.633746	1.71735e-157	7.45914e-153	0.32	0.542	NOP53 ribosome biogenesis factor [Source:HGNC Symbol;Acc:HGNC:4333]	down
ENSG00000099797	TECR	-0.631488	1.82651e-157	7.93328e-153	0.143	0.343	trans-2,3-enoyl-CoA reductase [Source:HGNC Symbol;Acc:HGNC:4551]	down
ENSG00000110321	EIF4G2	0.557994	1.84192e-157	8.00018e-153	0.755	0.652	eukaryotic translation initiation factor 4 gamma 2 [Source:HGNC Symbol;Acc:HGNC:3297]	up
ENSG00000146278	PNRC1	-0.551308	2.11913e-157	9.20423e-153	0.741	0.875	proline rich nuclear receptor coactivator 1 [Source:HGNC Symbol;Acc:HGNC:17278]	down
ENSG00000144713	RPL32	-0.45957	3.21491e-157	1.39636e-152	0.947	0.976	ribosomal protein L32 [Source:HGNC Symbol;Acc:HGNC:10336]	down
ENSG00000111252	SH2B3	-0.627253	3.40449e-157	1.47871e-152	0.193	0.414	SH2B adaptor protein 3 [Source:HGNC Symbol;Acc:HGNC:29605]	down
ENSG00000102786	INTS6	-0.742104	5.49495e-156	2.38668e-151	0.469	0.655	integrator complex subunit 6 [Source:HGNC Symbol;Acc:HGNC:14879]	down
ENSG00000151929	BAG3	-0.748005	1.84818e-155	8.02739e-151	0.23	0.441	BCL2 associated athanogene 3 [Source:HGNC Symbol;Acc:HGNC:939]	down
ENSG00000135905	DOCK10	0.73953	4.41412e-155	1.91723e-150	0.375	0.176	dedicator of cytokinesis 10 [Source:HGNC Symbol;Acc:HGNC:23479]	up
ENSG00000145425	RPS3A	-0.494012	5.21091e-155	2.26331e-150	0.851	0.932	ribosomal protein S3A [Source:HGNC Symbol;Acc:HGNC:10421]	down
ENSG00000053254	FOXN3	-0.628834	5.65803e-155	2.45751e-150	0.215	0.442	forkhead box N3 [Source:HGNC Symbol;Acc:HGNC:1928]	down
ENSG00000078043	PIAS2	-0.620938	1.73433e-154	7.53289e-150	0.095	0.277	protein inhibitor of activated STAT 2 [Source:HGNC Symbol;Acc:HGNC:17311]	down
ENSG00000082212	ME2	0.761478	5.18834e-153	2.2535e-148	0.472	0.321	malic enzyme 2 [Source:HGNC Symbol;Acc:HGNC:6984]	up
ENSG00000088854	C20orf194	-0.545513	7.75653e-153	3.36897e-148	0.09	0.272	chromosome 20 open reading frame 194 [Source:HGNC Symbol;Acc:HGNC:17721]	down
ENSG00000108256	NUFIP2	-0.63847	1.15143e-152	5.00112e-148	0.45	0.658	nuclear FMR1 interacting protein 2 [Source:HGNC Symbol;Acc:HGNC:17634]	down
ENSG00000117616	RSRP1	-0.641013	2.55055e-152	1.10781e-147	0.405	0.628	arginine and serine rich protein 1 [Source:HGNC Symbol;Acc:HGNC:25234]	down
ENSG00000109861	CTSC	-0.641673	5.44387e-151	2.36449e-146	0.495	0.696	cathepsin C [Source:HGNC Symbol;Acc:HGNC:2528]	down
ENSG00000109046	WSB1	-0.566355	1.0309e-150	4.47759e-146	0.664	0.811	WD repeat and SOCS box containing 1 [Source:HGNC Symbol;Acc:HGNC:19221]	down
ENSG00000125835	SNRPB	0.665502	2.62304e-150	1.13929e-145	0.5	0.288	small nuclear ribonucleoprotein polypeptides B and B1 [Source:HGNC Symbol;Acc:HGNC:11153]	up
ENSG00000122025	FLT3	-0.370757	1.02752e-149	4.46293e-145	0.017	0.13	fms related tyrosine kinase 3 [Source:HGNC Symbol;Acc:HGNC:3765]	down
ENSG00000164463	CREBRF	-0.669931	1.46761e-149	6.37442e-145	0.226	0.45	CREB3 regulatory factor [Source:HGNC Symbol;Acc:HGNC:24050]	down
ENSG00000161638	ITGA5	0.705917	4.41177e-149	1.91621e-144	0.386	0.169	integrin subunit alpha 5 [Source:HGNC Symbol;Acc:HGNC:6141]	up
ENSG00000184060	ADAP2	-0.640409	9.7224e-149	4.22283e-144	0.448	0.648	ArfGAP with dual PH domains 2 [Source:HGNC Symbol;Acc:HGNC:16487]	down
ENSG00000007944	MYLIP	-0.622515	1.071e-148	4.65177e-144	0.194	0.414	myosin regulatory light chain interacting protein [Source:HGNC Symbol;Acc:HGNC:21155]	down
ENSG00000187514	PTMA	0.436346	1.70767e-148	7.41711e-144	0.988	0.983	prothymosin alpha [Source:HGNC Symbol;Acc:HGNC:9623]	up
ENSG00000152767	FARP1	-0.443059	4.39216e-148	1.90769e-143	0.026	0.149	FERM, ARH/RhoGEF and pleckstrin domain protein 1 [Source:HGNC Symbol;Acc:HGNC:3591]	down
ENSG00000162616	DNAJB4	-0.639882	9.33997e-148	4.05672e-143	0.169	0.374	DnaJ heat shock protein family (Hsp40) member B4 [Source:HGNC Symbol;Acc:HGNC:14886]	down
ENSG00000125740	FOSB	-0.612715	1.18022e-147	5.12616e-143	0.777	0.872	FosB proto-oncogene, AP-1 transcription factor subunit [Source:HGNC Symbol;Acc:HGNC:3797]	down
ENSG00000120875	DUSP4	0.733957	1.64253e-147	7.13415e-143	0.179	0.024	dual specificity phosphatase 4 [Source:HGNC Symbol;Acc:HGNC:3070]	up
ENSG00000133574	GIMAP4	-0.556794	1.71952e-147	7.46855e-143	0.134	0.337	GTPase, IMAP family member 4 [Source:HGNC Symbol;Acc:HGNC:21872]	down
ENSG00000171314	PGAM1	0.671958	4.85147e-147	2.10719e-142	0.457	0.241	phosphoglycerate mutase 1 [Source:HGNC Symbol;Acc:HGNC:8888]	up
ENSG00000120896	SORBS3	-0.47449	7.66117e-147	3.32755e-142	0.061	0.218	sorbin and SH3 domain containing 3 [Source:HGNC Symbol;Acc:HGNC:30907]	down
ENSG00000122026	RPL21	-0.505851	2.13081e-146	9.25495e-142	0.778	0.899	ribosomal protein L21 [Source:HGNC Symbol;Acc:HGNC:10313]	down
ENSG00000257764	AC020656.1	0.801331	2.24533e-146	9.75237e-142	0.29	0.109	novel transcript, antisense to LYZ	up
ENSG00000122986	HVCN1	-0.466651	5.33399e-146	2.31677e-141	0.062	0.221	hydrogen voltage gated channel 1 [Source:HGNC Symbol;Acc:HGNC:28240]	down
ENSG00000143870	PDIA6	0.697994	1.22804e-145	5.33386e-141	0.51	0.333	protein disulfide isomerase family A member 6 [Source:HGNC Symbol;Acc:HGNC:30168]	up
ENSG00000225972	MTND1P23	1.29007	6.69717e-145	2.90885e-140	0.126	0.025	MT-ND1 pseudogene 23 [Source:HGNC Symbol;Acc:HGNC:42092]	up
ENSG00000233927	RPS28	-0.456717	6.93062e-145	3.01025e-140	0.936	0.968	ribosomal protein S28 [Source:HGNC Symbol;Acc:HGNC:10418]	down
ENSG00000181722	ZBTB20	-0.504976	1.18782e-144	5.15919e-140	0.058	0.215	zinc finger and BTB domain containing 20 [Source:HGNC Symbol;Acc:HGNC:13503]	down
ENSG00000167772	ANGPTL4	0.568691	1.32384e-144	5.74995e-140	0.131	0.006	angiopoietin like 4 [Source:HGNC Symbol;Acc:HGNC:16039]	up
ENSG00000165475	CRYL1	-0.55189	4.93637e-144	2.14406e-139	0.104	0.286	crystallin lambda 1 [Source:HGNC Symbol;Acc:HGNC:18246]	down
ENSG00000171222	SCAND1	0.650629	6.12887e-144	2.66201e-139	0.452	0.235	SCAN domain containing 1 [Source:HGNC Symbol;Acc:HGNC:10566]	up
ENSG00000119138	KLF9	-0.624089	6.60596e-144	2.86923e-139	0.305	0.534	Kruppel like factor 9 [Source:HGNC Symbol;Acc:HGNC:1123]	down
ENSG00000104964	AES	-0.591677	7.07682e-144	3.07375e-139	0.361	0.583	amino-terminal enhancer of split [Source:HGNC Symbol;Acc:HGNC:307]	down
ENSG00000132965	ALOX5AP	0.764294	8.08373e-144	3.51109e-139	0.488	0.46	arachidonate 5-lipoxygenase activating protein [Source:HGNC Symbol;Acc:HGNC:436]	up
ENSG00000112096	SOD2	0.660944	1.85384e-143	8.05197e-139	0.854	0.739	superoxide dismutase 2 [Source:HGNC Symbol;Acc:HGNC:11180]	up
ENSG00000101182	PSMA7	0.539587	3.96668e-142	1.72289e-137	0.745	0.639	proteasome subunit alpha 7 [Source:HGNC Symbol;Acc:HGNC:9536]	up
ENSG00000162512	SDC3	-0.534249	5.70668e-142	2.47864e-137	0.071	0.237	syndecan 3 [Source:HGNC Symbol;Acc:HGNC:10660]	down
ENSG00000064601	CTSA	0.669948	1.42268e-141	6.17928e-137	0.497	0.276	cathepsin A [Source:HGNC Symbol;Acc:HGNC:9251]	up
ENSG00000118680	MYL12B	0.563621	1.46648e-141	6.36951e-137	0.712	0.58	myosin light chain 12B [Source:HGNC Symbol;Acc:HGNC:29827]	up
ENSG00000179583	CIITA	-0.448757	2.42887e-141	1.05495e-136	0.059	0.212	class II major histocompatibility complex transactivator [Source:HGNC Symbol;Acc:HGNC:7067]	down
ENSG00000189058	APOD	-0.517551	4.4762e-141	1.94419e-136	0.098	0.279	apolipoprotein D [Source:HGNC Symbol;Acc:HGNC:612]	down
ENSG00000112715	VEGFA	0.780565	6.1753e-141	2.68218e-136	0.478	0.272	vascular endothelial growth factor A [Source:HGNC Symbol;Acc:HGNC:12680]	up
ENSG00000068305	MEF2A	-0.594675	8.08581e-141	3.51199e-136	0.275	0.493	myocyte enhancer factor 2A [Source:HGNC Symbol;Acc:HGNC:6993]	down
ENSG00000248187	AC078850.1	0.43449	3.17433e-140	1.37874e-135	0.124	0.005	novel transcript	up
ENSG00000173391	OLR1	0.708135	3.22483e-140	1.40067e-135	0.316	0.11	oxidized low density lipoprotein receptor 1 [Source:HGNC Symbol;Acc:HGNC:8133]	up
ENSG00000102760	RGCC	0.864102	5.70267e-140	2.4769e-135	0.383	0.174	regulator of cell cycle [Source:HGNC Symbol;Acc:HGNC:20369]	up
ENSG00000177700	POLR2L	0.647036	5.88832e-140	2.55753e-135	0.581	0.396	RNA polymerase II subunit L [Source:HGNC Symbol;Acc:HGNC:9199]	up
ENSG00000071127	WDR1	0.641565	1.26463e-139	5.49281e-135	0.507	0.307	WD repeat domain 1 [Source:HGNC Symbol;Acc:HGNC:12754]	up
ENSG00000158869	FCER1G	0.441693	2.21401e-139	9.61632e-135	0.93	0.908	Fc fragment of IgE receptor Ig [Source:HGNC Symbol;Acc:HGNC:3611]	up
ENSG00000106785	TRIM14	-0.556932	4.2255e-139	1.8353e-134	0.1	0.273	tripartite motif containing 14 [Source:HGNC Symbol;Acc:HGNC:16283]	down
ENSG00000171631	P2RY6	-0.28984	1.39664e-138	6.06616e-134	0.006	0.091	pyrimidinergic receptor P2Y6 [Source:HGNC Symbol;Acc:HGNC:8543]	no_diff
ENSG00000167703	SLC43A2	0.700625	1.43367e-138	6.22702e-134	0.598	0.418	solute carrier family 43 member 2 [Source:HGNC Symbol;Acc:HGNC:23087]	up
ENSG00000138640	FAM13A	-0.593189	4.64537e-138	2.01767e-133	0.145	0.341	family with sequence similarity 13 member A [Source:HGNC Symbol;Acc:HGNC:19367]	down
ENSG00000140859	KIFC3	0.480936	9.53722e-138	4.14239e-133	0.174	0.026	kinesin family member C3 [Source:HGNC Symbol;Acc:HGNC:6326]	up
ENSG00000125384	PTGER2	0.625386	5.65163e-137	2.45473e-132	0.257	0.075	prostaglandin E receptor 2 [Source:HGNC Symbol;Acc:HGNC:9594]	up
ENSG00000137309	HMGA1	0.672496	7.09385e-137	3.08114e-132	0.432	0.238	high mobility group AT-hook 1 [Source:HGNC Symbol;Acc:HGNC:5010]	up
ENSG00000279166	AC009951.1	0.699206	1.42676e-136	6.19697e-132	0.311	0.119	TEC	up
ENSG00000134769	DTNA	-0.332601	7.76807e-136	3.37398e-131	0.011	0.106	dystrobrevin alpha [Source:HGNC Symbol;Acc:HGNC:3057]	down
ENSG00000173457	PPP1R14B	0.666731	8.28946e-136	3.60044e-131	0.453	0.278	protein phosphatase 1 regulatory inhibitor subunit 14B [Source:HGNC Symbol;Acc:HGNC:9057]	up
ENSG00000198816	ZNF358	-0.447706	9.0894e-136	3.94789e-131	0.053	0.2	zinc finger protein 358 [Source:HGNC Symbol;Acc:HGNC:16838]	down
ENSG00000132432	SEC61G	0.654932	9.9687e-136	4.32981e-131	0.49	0.3	Sec61 translocon gamma subunit [Source:HGNC Symbol;Acc:HGNC:18277]	up
ENSG00000163563	MNDA	0.755105	1.14545e-135	4.97515e-131	0.522	0.367	myeloid cell nuclear differentiation antigen [Source:HGNC Symbol;Acc:HGNC:7183]	up
ENSG00000173110	HSPA6	-0.597679	1.60367e-135	6.96538e-131	0.224	0.44	heat shock protein family A (Hsp70) member 6 [Source:HGNC Symbol;Acc:HGNC:5239]	down
ENSG00000124614	RPS10	-0.579778	1.82462e-134	7.92506e-130	0.404	0.587	ribosomal protein S10 [Source:HGNC Symbol;Acc:HGNC:10383]	down
ENSG00000214026	MRPL23	0.643709	2.19637e-134	9.53973e-130	0.4	0.195	mitochondrial ribosomal protein L23 [Source:HGNC Symbol;Acc:HGNC:10322]	up
ENSG00000135837	CEP350	-0.609125	2.75885e-134	1.19828e-129	0.297	0.506	centrosomal protein 350 [Source:HGNC Symbol;Acc:HGNC:24238]	down
ENSG00000128340	RAC2	0.654585	4.94233e-134	2.14665e-129	0.436	0.236	Rac family small GTPase 2 [Source:HGNC Symbol;Acc:HGNC:9802]	up
ENSG00000123610	TNFAIP6	0.59824	5.08464e-134	2.20846e-129	0.215	0.049	TNF alpha induced protein 6 [Source:HGNC Symbol;Acc:HGNC:11898]	up
ENSG00000154262	ABCA6	-0.405725	5.41861e-134	2.35352e-129	0.016	0.12	ATP binding cassette subfamily A member 6 [Source:HGNC Symbol;Acc:HGNC:36]	down
ENSG00000133121	STARD13	-0.397829	7.01124e-134	3.04526e-129	0.035	0.161	StAR related lipid transfer domain containing 13 [Source:HGNC Symbol;Acc:HGNC:19164]	down
ENSG00000171115	GIMAP8	-0.435846	1.2806e-133	5.56214e-129	0.058	0.207	GTPase, IMAP family member 8 [Source:HGNC Symbol;Acc:HGNC:21792]	down
ENSG00000226380	AC016831.1	0.623914	1.67658e-133	7.28205e-129	0.247	0.076	novel transcript	up
ENSG00000113719	ERGIC1	0.664312	3.03537e-133	1.31838e-128	0.433	0.227	endoplasmic reticulum-golgi intermediate compartment 1 [Source:HGNC Symbol;Acc:HGNC:29205]	up
ENSG00000175550	DRAP1	0.623343	3.91462e-133	1.70028e-128	0.486	0.288	DR1 associated protein 1 [Source:HGNC Symbol;Acc:HGNC:3019]	up
ENSG00000188257	PLA2G2A	-0.429261	4.13136e-133	1.79441e-128	0.076	0.23	phospholipase A2 group IIA [Source:HGNC Symbol;Acc:HGNC:9031]	down
ENSG00000157107	FCHO2	-0.588313	1.62855e-132	7.07344e-128	0.169	0.364	FCH domain only 2 [Source:HGNC Symbol;Acc:HGNC:25180]	down
ENSG00000075223	SEMA3C	0.443896	2.60226e-132	1.13026e-127	0.154	0.018	semaphorin 3C [Source:HGNC Symbol;Acc:HGNC:10725]	up
ENSG00000171858	RPS21	-0.459185	5.64768e-132	2.45301e-127	0.86	0.924	ribosomal protein S21 [Source:HGNC Symbol;Acc:HGNC:10409]	down
ENSG00000153208	MERTK	-0.600066	8.50826e-132	3.69548e-127	0.286	0.49	MER proto-oncogene, tyrosine kinase [Source:HGNC Symbol;Acc:HGNC:7027]	down
ENSG00000129824	RPS4Y1	-0.553521	1.24807e-131	5.42085e-127	0.35	0.581	ribosomal protein S4 Y-linked 1 [Source:HGNC Symbol;Acc:HGNC:10425]	down
ENSG00000151914	DST	-0.599224	1.40421e-131	6.09903e-127	0.128	0.309	dystonin [Source:HGNC Symbol;Acc:HGNC:1090]	down
ENSG00000185862	EVI2B	-0.601525	1.48462e-131	6.44829e-127	0.408	0.606	ecotropic viral integration site 2B [Source:HGNC Symbol;Acc:HGNC:3500]	down
ENSG00000168906	MAT2A	-0.600001	3.10087e-131	1.34683e-126	0.299	0.5	methionine adenosyltransferase 2A [Source:HGNC Symbol;Acc:HGNC:6904]	down
ENSG00000091527	CDV3	0.547671	6.83631e-131	2.96928e-126	0.704	0.574	CDV3 homolog [Source:HGNC Symbol;Acc:HGNC:26928]	up
ENSG00000132963	POMP	0.58448	6.92728e-131	3.00879e-126	0.624	0.455	proteasome maturation protein [Source:HGNC Symbol;Acc:HGNC:20330]	up
ENSG00000163399	ATP1A1	0.636716	1.11165e-130	4.82833e-126	0.638	0.468	ATPase Na+/K+ transporting subunit alpha 1 [Source:HGNC Symbol;Acc:HGNC:799]	up
ENSG00000156127	BATF	0.535608	1.48677e-130	6.45763e-126	0.203	0.046	basic leucine zipper ATF-like transcription factor [Source:HGNC Symbol;Acc:HGNC:958]	up
ENSG00000152492	CCDC50	-0.507969	2.18011e-130	9.46909e-126	0.101	0.267	coiled-coil domain containing 50 [Source:HGNC Symbol;Acc:HGNC:18111]	down
ENSG00000072364	AFF4	-0.611895	6.14822e-130	2.67042e-125	0.391	0.575	AF4/FMR2 family member 4 [Source:HGNC Symbol;Acc:HGNC:17869]	down
ENSG00000137478	FCHSD2	-0.484447	8.90735e-130	3.86882e-125	0.083	0.247	FCH and double SH3 domains 2 [Source:HGNC Symbol;Acc:HGNC:29114]	down
ENSG00000130522	JUND	-0.522202	1.3572e-129	5.89487e-125	0.829	0.895	JunD proto-oncogene, AP-1 transcription factor subunit [Source:HGNC Symbol;Acc:HGNC:6206]	down
ENSG00000055483	USP36	-0.631893	2.05119e-129	8.90912e-125	0.185	0.372	ubiquitin specific peptidase 36 [Source:HGNC Symbol;Acc:HGNC:20062]	down
ENSG00000100911	PSME2	0.622757	4.64793e-129	2.01878e-124	0.386	0.18	proteasome activator subunit 2 [Source:HGNC Symbol;Acc:HGNC:9569]	up
ENSG00000071967	CYBRD1	-0.409559	2.46841e-128	1.07213e-123	0.052	0.191	cytochrome b reductase 1 [Source:HGNC Symbol;Acc:HGNC:20797]	down
ENSG00000104131	EIF3J	0.668344	2.96693e-128	1.28866e-123	0.466	0.284	eukaryotic translation initiation factor 3 subunit J [Source:HGNC Symbol;Acc:HGNC:3270]	up
ENSG00000167470	MIDN	-0.577507	5.04684e-128	2.19205e-123	0.51	0.673	midnolin [Source:HGNC Symbol;Acc:HGNC:16298]	down
ENSG00000099783	HNRNPM	0.617493	1.08381e-127	4.7074e-123	0.474	0.279	heterogeneous nuclear ribonucleoprotein M [Source:HGNC Symbol;Acc:HGNC:5046]	up
ENSG00000169902	TPST1	0.491748	1.25784e-127	5.46331e-123	0.182	0.036	tyrosylprotein sulfotransferase 1 [Source:HGNC Symbol;Acc:HGNC:12020]	up
ENSG00000167468	GPX4	0.567679	3.0711e-127	1.3339e-122	0.712	0.578	glutathione peroxidase 4 [Source:HGNC Symbol;Acc:HGNC:4556]	up
ENSG00000142937	RPS8	-0.427702	2.15349e-126	9.35349e-122	0.962	0.977	ribosomal protein S8 [Source:HGNC Symbol;Acc:HGNC:10441]	down
ENSG00000186417	GLDN	-0.372811	2.72448e-126	1.18335e-121	0.044	0.166	gliomedin [Source:HGNC Symbol;Acc:HGNC:29514]	down
ENSG00000067048	DDX3Y	-0.609038	3.61569e-126	1.57044e-121	0.289	0.503	DEAD-box helicase 3 Y-linked [Source:HGNC Symbol;Acc:HGNC:2699]	down
ENSG00000196814	MVB12B	-0.274832	4.55447e-126	1.97819e-121	0.011	0.099	multivesicular body subunit 12B [Source:HGNC Symbol;Acc:HGNC:23368]	no_diff
ENSG00000164292	RHOBTB3	-0.478864	5.63728e-126	2.4485e-121	0.069	0.219	Rho related BTB domain containing 3 [Source:HGNC Symbol;Acc:HGNC:18757]	down
ENSG00000150753	CCT5	0.626584	7.99886e-126	3.47422e-121	0.468	0.274	chaperonin containing TCP1 subunit 5 [Source:HGNC Symbol;Acc:HGNC:1618]	up
ENSG00000100234	TIMP3	-0.467203	1.48002e-125	6.42834e-121	0.04	0.165	TIMP metallopeptidase inhibitor 3 [Source:HGNC Symbol;Acc:HGNC:11822]	down
ENSG00000182566	CLEC4G	-0.37405	3.21417e-125	1.39604e-120	0.005	0.08	C-type lectin domain family 4 member G [Source:HGNC Symbol;Acc:HGNC:24591]	no_diff
ENSG00000147065	MSN	0.540432	5.80121e-125	2.5197e-120	0.699	0.564	moesin [Source:HGNC Symbol;Acc:HGNC:7373]	up
ENSG00000002933	TMEM176A	-0.569146	9.21814e-125	4.00381e-120	0.105	0.279	transmembrane protein 176A [Source:HGNC Symbol;Acc:HGNC:24930]	down
ENSG00000125810	CD93	0.680026	1.36776e-124	5.94074e-120	0.623	0.446	CD93 molecule [Source:HGNC Symbol;Acc:HGNC:15855]	up
ENSG00000187239	FNBP1	-0.565189	2.18848e-124	9.50544e-120	0.34	0.536	formin binding protein 1 [Source:HGNC Symbol;Acc:HGNC:17069]	down
ENSG00000079950	STX7	-0.588536	3.35685e-124	1.45801e-119	0.223	0.417	syntaxin 7 [Source:HGNC Symbol;Acc:HGNC:11442]	down
ENSG00000108953	YWHAE	0.550594	4.94287e-124	2.14689e-119	0.625	0.481	tyrosine 3-monooxygenase/tryptophan 5-monooxygenase activation protein epsilon [Source:HGNC Symbol;Acc:HGNC:12851]	up
ENSG00000165655	ZNF503	-0.600616	5.37986e-124	2.33669e-119	0.162	0.342	zinc finger protein 503 [Source:HGNC Symbol;Acc:HGNC:23589]	down
ENSG00000106153	CHCHD2	0.509036	8.41277e-124	3.654e-119	0.7	0.587	coiled-coil-helix-coiled-coil-helix domain containing 2 [Source:HGNC Symbol;Acc:HGNC:21645]	up
ENSG00000169499	PLEKHA2	-0.549556	1.49279e-123	6.48379e-119	0.208	0.405	pleckstrin homology domain containing A2 [Source:HGNC Symbol;Acc:HGNC:14336]	down
ENSG00000011422	PLAUR	0.663747	3.23984e-123	1.40719e-118	0.716	0.549	plasminogen activator, urokinase receptor [Source:HGNC Symbol;Acc:HGNC:9053]	up
ENSG00000104918	RETN	0.854793	3.39121e-123	1.47294e-118	0.39	0.343	resistin [Source:HGNC Symbol;Acc:HGNC:20389]	up
ENSG00000141522	ARHGDIA	0.568794	4.19964e-123	1.82407e-118	0.642	0.501	Rho GDP dissociation inhibitor alpha [Source:HGNC Symbol;Acc:HGNC:678]	up
ENSG00000164587	RPS14	-0.391978	5.24862e-123	2.27969e-118	0.966	0.976	ribosomal protein S14 [Source:HGNC Symbol;Acc:HGNC:10387]	down
ENSG00000168918	INPP5D	-0.505509	1.14747e-122	4.98393e-118	0.136	0.319	inositol polyphosphate-5-phosphatase D [Source:HGNC Symbol;Acc:HGNC:6079]	down
ENSG00000170458	CD14	0.57978	2.98915e-122	1.29831e-117	0.843	0.795	CD14 molecule [Source:HGNC Symbol;Acc:HGNC:1628]	up
ENSG00000119865	CNRIP1	-0.433172	8.31693e-122	3.61238e-117	0.049	0.176	cannabinoid receptor interacting protein 1 [Source:HGNC Symbol;Acc:HGNC:24546]	down
ENSG00000115112	TFCP2L1	-0.299163	9.03338e-122	3.92356e-117	0.012	0.099	transcription factor CP2 like 1 [Source:HGNC Symbol;Acc:HGNC:17925]	no_diff
ENSG00000109906	ZBTB16	-0.439724	1.0114e-121	4.39293e-117	0.089	0.248	zinc finger and BTB domain containing 16 [Source:HGNC Symbol;Acc:HGNC:12930]	down
ENSG00000129226	CD68	-0.478208	1.32053e-121	5.73561e-117	0.073	0.224	CD68 molecule [Source:HGNC Symbol;Acc:HGNC:1693]	down
ENSG00000112936	C7	-0.35417	2.82243e-121	1.22589e-116	0.017	0.113	complement C7 [Source:HGNC Symbol;Acc:HGNC:1346]	down
ENSG00000179593	ALOX15B	-0.333703	2.91585e-121	1.26647e-116	0.018	0.118	arachidonate 15-lipoxygenase, type B [Source:HGNC Symbol;Acc:HGNC:434]	down
ENSG00000100592	DAAM1	-0.495931	3.99123e-121	1.73355e-116	0.068	0.216	dishevelled associated activator of morphogenesis 1 [Source:HGNC Symbol;Acc:HGNC:18142]	down
ENSG00000104093	DMXL2	0.639102	5.61344e-121	2.43814e-116	0.509	0.333	Dmx like 2 [Source:HGNC Symbol;Acc:HGNC:2938]	up
ENSG00000160179	ABCG1	-0.465135	6.90896e-121	3.00084e-116	0.086	0.244	ATP binding cassette subfamily G member 1 [Source:HGNC Symbol;Acc:HGNC:73]	down
ENSG00000183722	LHFPL6	-0.310936	8.15565e-121	3.54233e-116	0.015	0.108	LHFPL tetraspan subfamily member 6 [Source:HGNC Symbol;Acc:HGNC:6586]	down
ENSG00000144791	LIMD1	-0.447848	1.17766e-120	5.11504e-116	0.057	0.196	LIM domains containing 1 [Source:HGNC Symbol;Acc:HGNC:6612]	down
ENSG00000175130	MARCKSL1	0.641563	1.56873e-120	6.81361e-116	0.259	0.097	MARCKS like 1 [Source:HGNC Symbol;Acc:HGNC:7142]	up
ENSG00000115355	CCDC88A	-0.532427	1.61677e-120	7.02226e-116	0.64	0.779	coiled-coil domain containing 88A [Source:HGNC Symbol;Acc:HGNC:25523]	down
ENSG00000280721	LINC01943	0.377156	1.73327e-120	7.52829e-116	0.116	0.007	long intergenic non-protein coding RNA 1943 [Source:HGNC Symbol;Acc:HGNC:52767]	up
ENSG00000185650	ZFP36L1	-0.449509	2.29767e-120	9.97972e-116	0.838	0.922	ZFP36 ring finger protein like 1 [Source:HGNC Symbol;Acc:HGNC:1107]	down
ENSG00000163710	PCOLCE2	0.488159	2.35716e-120	1.02381e-115	0.144	0.018	procollagen C-endopeptidase enhancer 2 [Source:HGNC Symbol;Acc:HGNC:8739]	up
ENSG00000142875	PRKACB	-0.474569	2.41873e-120	1.05055e-115	0.081	0.232	protein kinase cAMP-activated catalytic subunit beta [Source:HGNC Symbol;Acc:HGNC:9381]	down
ENSG00000149311	ATM	-0.549508	1.99829e-119	8.67939e-115	0.234	0.437	ATM serine/threonine kinase [Source:HGNC Symbol;Acc:HGNC:795]	down
ENSG00000095585	BLNK	-0.317398	3.40587e-119	1.4793e-114	0.021	0.122	B cell linker [Source:HGNC Symbol;Acc:HGNC:14211]	down
ENSG00000103363	ELOB	0.50733	4.37826e-119	1.90165e-114	0.73	0.615	elongin B [Source:HGNC Symbol;Acc:HGNC:11619]	up
ENSG00000139343	SNRPF	0.598014	4.63037e-119	2.01115e-114	0.386	0.195	small nuclear ribonucleoprotein polypeptide F [Source:HGNC Symbol;Acc:HGNC:11162]	up
ENSG00000005059	MCUB	0.595399	4.71094e-119	2.04615e-114	0.397	0.21	mitochondrial calcium uniporter dominant negative beta subunit [Source:HGNC Symbol;Acc:HGNC:26076]	up
ENSG00000185624	P4HB	0.537321	4.71169e-119	2.04648e-114	0.664	0.556	prolyl 4-hydroxylase subunit beta [Source:HGNC Symbol;Acc:HGNC:8548]	up
ENSG00000262061	AC129507.1	-0.224043	4.92892e-119	2.14083e-114	0.001	0.062	uncharacterized LOC100506388 [Source:NCBI gene;Acc:100506388]	no_diff
ENSG00000254415	SIGLEC14	0.308971	7.67189e-119	3.33221e-114	0.102	0.003	sialic acid binding Ig like lectin 14 [Source:HGNC Symbol;Acc:HGNC:32926]	up
ENSG00000100596	SPTLC2	-0.512747	7.87645e-119	3.42106e-114	0.172	0.361	serine palmitoyltransferase long chain base subunit 2 [Source:HGNC Symbol;Acc:HGNC:11278]	down
ENSG00000197111	PCBP2	-0.491679	1.03063e-118	4.47645e-114	0.589	0.735	poly(rC) binding protein 2 [Source:HGNC Symbol;Acc:HGNC:8648]	down
ENSG00000198363	ASPH	0.631602	1.96771e-118	8.54653e-114	0.441	0.262	aspartate beta-hydroxylase [Source:HGNC Symbol;Acc:HGNC:757]	up
ENSG00000105323	HNRNPUL1	-0.579711	2.029e-118	8.81275e-114	0.319	0.504	heterogeneous nuclear ribonucleoprotein U like 1 [Source:HGNC Symbol;Acc:HGNC:17011]	down
ENSG00000266412	NCOA4	-0.549707	2.99153e-118	1.29934e-113	0.387	0.582	nuclear receptor coactivator 4 [Source:HGNC Symbol;Acc:HGNC:7671]	down
ENSG00000157557	ETS2	0.574607	3.26459e-118	1.41794e-113	0.662	0.557	ETS proto-oncogene 2, transcription factor [Source:HGNC Symbol;Acc:HGNC:3489]	up
ENSG00000108932	SLC16A6	0.635457	7.83599e-118	3.40348e-113	0.208	0.056	solute carrier family 16 member 6 [Source:HGNC Symbol;Acc:HGNC:10927]	up
ENSG00000112695	COX7A2	0.57878	9.10114e-118	3.95299e-113	0.571	0.394	cytochrome c oxidase subunit 7A2 [Source:HGNC Symbol;Acc:HGNC:2288]	up
ENSG00000177000	MTHFR	-0.487095	1.89259e-117	8.22027e-113	0.124	0.297	methylenetetrahydrofolate reductase [Source:HGNC Symbol;Acc:HGNC:7436]	down
ENSG00000128016	ZFP36	-0.563401	3.23643e-117	1.40571e-112	0.6	0.731	ZFP36 ring finger protein [Source:NCBI gene;Acc:7538]	down
ENSG00000197405	C5AR1	0.521473	5.40667e-117	2.34833e-112	0.854	0.744	complement C5a receptor 1 [Source:HGNC Symbol;Acc:HGNC:1338]	up
ENSG00000186469	GNG2	-0.514616	8.93304e-117	3.87998e-112	0.129	0.304	G protein subunit gamma 2 [Source:HGNC Symbol;Acc:HGNC:4404]	down
ENSG00000067900	ROCK1	-0.498628	2.38193e-116	1.03457e-111	0.603	0.756	Rho associated coiled-coil containing protein kinase 1 [Source:HGNC Symbol;Acc:HGNC:10251]	down
ENSG00000155849	ELMO1	-0.451881	3.04602e-116	1.32301e-111	0.104	0.267	engulfment and cell motility 1 [Source:HGNC Symbol;Acc:HGNC:16286]	down
ENSG00000176485	PLA2G16	-0.392373	8.14601e-116	3.53814e-111	0.046	0.171	phospholipase A2 group XVI [Source:HGNC Symbol;Acc:HGNC:17825]	down
ENSG00000105722	ERF	-0.514381	1.13328e-115	4.92231e-111	0.095	0.245	ETS2 repressor factor [Source:HGNC Symbol;Acc:HGNC:3444]	down
ENSG00000211677	IGLC2	-0.56694	1.96585e-115	8.53846e-111	0.069	0.195	immunoglobulin lambda constant 2 [Source:HGNC Symbol;Acc:HGNC:5856]	down
ENSG00000172889	EGFL7	-0.501722	2.03827e-115	8.853e-111	0.053	0.176	EGF like domain multiple 7 [Source:HGNC Symbol;Acc:HGNC:20594]	down
ENSG00000153187	HNRNPU	-0.516542	3.53612e-115	1.53588e-110	0.772	0.855	heterogeneous nuclear ribonucleoprotein U [Source:HGNC Symbol;Acc:HGNC:5048]	down
ENSG00000176046	NUPR1	-0.486002	3.55732e-115	1.54509e-110	0.029	0.137	nuclear protein 1, transcriptional regulator [Source:HGNC Symbol;Acc:HGNC:29990]	down
ENSG00000042980	ADAM28	-0.345896	3.72626e-115	1.61846e-110	0.042	0.164	ADAM metallopeptidase domain 28 [Source:HGNC Symbol;Acc:HGNC:206]	down
ENSG00000172965	MIR4435-2HG	0.398678	3.77001e-115	1.63746e-110	0.143	0.019	MIR4435-2 host gene [Source:HGNC Symbol;Acc:HGNC:35163]	up
ENSG00000100100	PIK3IP1	-0.479861	5.31044e-115	2.30654e-110	0.087	0.237	phosphoinositide-3-kinase interacting protein 1 [Source:HGNC Symbol;Acc:HGNC:24942]	down
ENSG00000130340	SNX9	-0.56248	5.89705e-115	2.56133e-110	0.218	0.405	sorting nexin 9 [Source:HGNC Symbol;Acc:HGNC:14973]	down
ENSG00000090238	YPEL3	-0.496555	7.31645e-115	3.17782e-110	0.139	0.317	yippee like 3 [Source:HGNC Symbol;Acc:HGNC:18327]	down
ENSG00000160593	JAML	-0.259281	8.01432e-115	3.48094e-110	0.082	0.211	junction adhesion molecule like [Source:HGNC Symbol;Acc:HGNC:19084]	no_diff
ENSG00000125505	MBOAT7	0.607054	9.39659e-115	4.08132e-110	0.279	0.109	membrane bound O-acyltransferase domain containing 7 [Source:HGNC Symbol;Acc:HGNC:15505]	up
ENSG00000090674	MCOLN1	-0.580702	1.51911e-114	6.59811e-110	0.206	0.388	mucolipin 1 [Source:HGNC Symbol;Acc:HGNC:13356]	down
ENSG00000139218	SCAF11	-0.507894	1.81815e-114	7.89697e-110	0.51	0.691	SR-related CTD associated factor 11 [Source:HGNC Symbol;Acc:HGNC:10784]	down
ENSG00000135318	NT5E	0.414573	1.92531e-114	8.36237e-110	0.097	0.002	5'-nucleotidase ecto [Source:HGNC Symbol;Acc:HGNC:8021]	no_diff
ENSG00000157827	FMNL2	-0.477953	4.48212e-114	1.94677e-109	0.109	0.269	formin like 2 [Source:HGNC Symbol;Acc:HGNC:18267]	down
ENSG00000162783	IER5	-0.573787	1.25578e-113	5.45434e-109	0.421	0.609	immediate early response 5 [Source:HGNC Symbol;Acc:HGNC:5393]	down
ENSG00000182117	NOP10	0.551352	1.40703e-113	6.11131e-109	0.604	0.455	NOP10 ribonucleoprotein [Source:HGNC Symbol;Acc:HGNC:14378]	up
ENSG00000182578	CSF1R	-0.524304	3.44345e-113	1.49563e-108	0.544	0.707	colony stimulating factor 1 receptor [Source:HGNC Symbol;Acc:HGNC:2433]	down
ENSG00000011405	PIK3C2A	-0.488443	4.77565e-113	2.07425e-108	0.125	0.291	phosphatidylinositol-4-phosphate 3-kinase catalytic subunit type 2 alpha [Source:HGNC Symbol;Acc:HGNC:8971]	down
ENSG00000168653	NDUFS5	0.55493	4.86886e-113	2.11474e-108	0.614	0.438	NADH:ubiquinone oxidoreductase subunit S5 [Source:HGNC Symbol;Acc:HGNC:7712]	up
ENSG00000130755	GMFG	0.557106	7.26576e-113	3.15581e-108	0.649	0.502	glia maturation factor gamma [Source:HGNC Symbol;Acc:HGNC:4374]	up
ENSG00000119655	NPC2	-0.406809	9.53287e-113	4.14051e-108	0.859	0.933	NPC intracellular cholesterol transporter 2 [Source:HGNC Symbol;Acc:HGNC:14537]	down
ENSG00000229124	VIM-AS1	0.509348	2.03715e-112	8.84815e-108	0.184	0.043	VIM antisense RNA 1 [Source:HGNC Symbol;Acc:HGNC:44879]	up
ENSG00000156171	DRAM2	-0.508263	5.36782e-112	2.33146e-107	0.189	0.367	DNA damage regulated autophagy modulator 2 [Source:HGNC Symbol;Acc:HGNC:28769]	down
ENSG00000155926	SLA	0.512806	1.14155e-111	4.9582e-107	0.664	0.602	Src like adaptor [Source:HGNC Symbol;Acc:HGNC:10902]	up
ENSG00000130724	CHMP2A	0.573376	1.2983e-111	5.63904e-107	0.514	0.327	charged multivesicular body protein 2A [Source:HGNC Symbol;Acc:HGNC:30216]	up
ENSG00000128699	ORMDL1	-0.544184	1.71011e-111	7.4277e-107	0.28	0.459	ORMDL sphingolipid biosynthesis regulator 1 [Source:HGNC Symbol;Acc:HGNC:16036]	down
ENSG00000127948	POR	0.577079	1.72749e-111	7.50316e-107	0.291	0.125	cytochrome p450 oxidoreductase [Source:HGNC Symbol;Acc:HGNC:9208]	up
ENSG00000111716	LDHB	-0.509638	2.47945e-111	1.07692e-106	0.151	0.311	lactate dehydrogenase B [Source:HGNC Symbol;Acc:HGNC:6541]	down
ENSG00000170385	SLC30A1	-0.567981	2.77275e-111	1.20432e-106	0.178	0.342	solute carrier family 30 member 1 [Source:HGNC Symbol;Acc:HGNC:11012]	down
ENSG00000269893	SNHG8	-0.559935	4.06405e-111	1.76518e-106	0.325	0.502	small nucleolar RNA host gene 8 [Source:HGNC Symbol;Acc:HGNC:33098]	down
ENSG00000156136	DCK	-0.401112	4.49229e-111	1.95118e-106	0.052	0.178	deoxycytidine kinase [Source:HGNC Symbol;Acc:HGNC:2704]	down
ENSG00000179094	AC129492.1	-0.534035	4.82234e-111	2.09454e-106	0.3	0.507	period circadian regulator 1 [Source:NCBI gene;Acc:5187]	down
ENSG00000125730	C3	-0.416693	5.45292e-111	2.36842e-106	0.054	0.182	complement C3 [Source:HGNC Symbol;Acc:HGNC:1318]	down
ENSG00000114125	RNF7	0.569793	6.81127e-111	2.95841e-106	0.509	0.338	ring finger protein 7 [Source:HGNC Symbol;Acc:HGNC:10070]	up
ENSG00000129128	SPCS3	0.575455	1.64639e-110	7.15094e-106	0.514	0.329	signal peptidase complex subunit 3 [Source:HGNC Symbol;Acc:HGNC:26212]	up
ENSG00000160307	S100B	-0.383292	2.00116e-110	8.69185e-106	0.013	0.095	S100 calcium binding protein B [Source:HGNC Symbol;Acc:HGNC:10500]	no_diff
ENSG00000132341	RAN	0.551214	4.12902e-110	1.7934e-105	0.535	0.398	RAN, member RAS oncogene family [Source:HGNC Symbol;Acc:HGNC:9846]	up
ENSG00000100852	ARHGAP5	-0.510703	5.83916e-110	2.53618e-105	0.13	0.297	Rho GTPase activating protein 5 [Source:HGNC Symbol;Acc:HGNC:675]	down
ENSG00000077942	FBLN1	-0.388059	1.17224e-109	5.09149e-105	0.044	0.164	fibulin 1 [Source:HGNC Symbol;Acc:HGNC:3600]	down
ENSG00000074842	MYDGF	0.58194	1.19503e-109	5.19048e-105	0.405	0.231	myeloid derived growth factor [Source:HGNC Symbol;Acc:HGNC:16948]	up
ENSG00000164683	HEY1	0.426519	7.10439e-109	3.08572e-104	0.104	0.006	hes related family bHLH transcription factor with YRPW motif 1 [Source:HGNC Symbol;Acc:HGNC:4880]	up
ENSG00000119729	RHOQ	-0.536193	7.52958e-109	3.2704e-104	0.377	0.564	ras homolog family member Q [Source:HGNC Symbol;Acc:HGNC:17736]	down
ENSG00000147874	HAUS6	0.573965	1.45836e-108	6.33423e-104	0.215	0.066	HAUS augmin like complex subunit 6 [Source:HGNC Symbol;Acc:HGNC:25948]	up
ENSG00000165338	HECTD2	-0.30652	1.47487e-108	6.40596e-104	0.024	0.123	HECT domain E3 ubiquitin protein ligase 2 [Source:HGNC Symbol;Acc:HGNC:26736]	down
ENSG00000064393	HIPK2	0.618322	2.17259e-108	9.43641e-104	0.372	0.201	homeodomain interacting protein kinase 2 [Source:HGNC Symbol;Acc:HGNC:14402]	up
ENSG00000135643	KCNMB4	-0.20818	2.24274e-108	9.74113e-104	0.007	0.078	potassium calcium-activated channel subfamily M regulatory beta subunit 4 [Source:HGNC Symbol;Acc:HGNC:6289]	no_diff
ENSG00000145912	NHP2	0.585687	2.57646e-108	1.11906e-103	0.332	0.157	NHP2 ribonucleoprotein [Source:HGNC Symbol;Acc:HGNC:14377]	up
ENSG00000129757	CDKN1C	-0.455124	3.33138e-108	1.44695e-103	0.058	0.189	cyclin dependent kinase inhibitor 1C [Source:HGNC Symbol;Acc:HGNC:1786]	down
ENSG00000172531	PPP1CA	0.54625	3.83179e-108	1.6643e-103	0.539	0.359	protein phosphatase 1 catalytic subunit alpha [Source:HGNC Symbol;Acc:HGNC:9281]	up
ENSG00000106976	DNM1	-0.285512	7.65719e-108	3.32582e-103	0.01	0.087	dynamin 1 [Source:HGNC Symbol;Acc:HGNC:2972]	no_diff
ENSG00000204256	BRD2	-0.535575	7.86428e-108	3.41577e-103	0.463	0.63	bromodomain containing 2 [Source:HGNC Symbol;Acc:HGNC:1103]	down
ENSG00000062282	DGAT2	0.324169	1.06389e-107	4.62092e-103	0.089	0.002	diacylglycerol O-acyltransferase 2 [Source:HGNC Symbol;Acc:HGNC:16940]	no_diff
ENSG00000143819	EPHX1	-0.357506	1.3313e-107	5.78236e-103	0.026	0.126	epoxide hydrolase 1 [Source:HGNC Symbol;Acc:HGNC:3401]	down
ENSG00000183020	AP2A2	-0.575578	1.51576e-107	6.58357e-103	0.307	0.484	adaptor related protein complex 2 subunit alpha 2 [Source:HGNC Symbol;Acc:HGNC:562]	down
ENSG00000157259	GATAD1	-0.49105	1.62672e-107	7.06551e-103	0.163	0.335	GATA zinc finger domain containing 1 [Source:HGNC Symbol;Acc:HGNC:29941]	down
ENSG00000138439	FAM117B	-0.289835	2.38727e-107	1.03689e-102	0.021	0.115	family with sequence similarity 117 member B [Source:HGNC Symbol;Acc:HGNC:14440]	down
ENSG00000160888	IER2	-0.480627	2.88052e-107	1.25113e-102	0.65	0.81	immediate early response 2 [Source:HGNC Symbol;Acc:HGNC:28871]	down
ENSG00000140497	SCAMP2	-0.52522	2.90026e-107	1.2597e-102	0.292	0.477	secretory carrier membrane protein 2 [Source:HGNC Symbol;Acc:HGNC:10564]	down
ENSG00000176170	SPHK1	0.441406	4.0296e-107	1.75022e-102	0.172	0.038	sphingosine kinase 1 [Source:NCBI gene;Acc:8877]	up
ENSG00000162692	VCAM1	-0.306633	4.96699e-107	2.15736e-102	0.002	0.057	vascular cell adhesion molecule 1 [Source:HGNC Symbol;Acc:HGNC:12663]	no_diff
ENSG00000211895	IGHA1	-0.512348	5.18428e-107	2.25174e-102	0.057	0.17	immunoglobulin heavy constant alpha 1 [Source:HGNC Symbol;Acc:HGNC:5478]	down
ENSG00000125995	ROMO1	0.561721	5.73654e-107	2.49161e-102	0.427	0.24	reactive oxygen species modulator 1 [Source:HGNC Symbol;Acc:HGNC:16185]	up
ENSG00000162444	RBP7	-0.535031	6.93213e-107	3.0109e-102	0.198	0.376	retinol binding protein 7 [Source:HGNC Symbol;Acc:HGNC:30316]	down
ENSG00000279400	AC008957.3	-0.335068	1.19585e-106	5.19404e-102	0.022	0.119	TEC	down
ENSG00000126821	SGPP1	-0.324995	1.49238e-106	6.48198e-102	0.027	0.128	sphingosine-1-phosphate phosphatase 1 [Source:HGNC Symbol;Acc:HGNC:17720]	down
ENSG00000197448	GSTK1	-0.501132	2.82102e-106	1.22528e-101	0.255	0.441	glutathione S-transferase kappa 1 [Source:HGNC Symbol;Acc:HGNC:16906]	down
ENSG00000249992	TMEM158	0.424489	3.02146e-106	1.31234e-101	0.119	0.013	transmembrane protein 158 (gene/pseudogene) [Source:HGNC Symbol;Acc:HGNC:30293]	up
ENSG00000002587	HS3ST1	0.41096	5.27353e-106	2.2905e-101	0.146	0.024	heparan sulfate-glucosamine 3-sulfotransferase 1 [Source:HGNC Symbol;Acc:HGNC:5194]	up
ENSG00000203710	CR1	-0.468117	6.78503e-106	2.94701e-101	0.121	0.285	complement C3b/C4b receptor 1 (Knops blood group) [Source:HGNC Symbol;Acc:HGNC:2334]	down
ENSG00000143549	TPM3	0.347471	8.99378e-106	3.90636e-101	0.875	0.856	tropomyosin 3 [Source:HGNC Symbol;Acc:HGNC:12012]	up
ENSG00000077782	FGFR1	-0.480147	9.84937e-106	4.27797e-101	0.074	0.208	fibroblast growth factor receptor 1 [Source:HGNC Symbol;Acc:HGNC:3688]	down
ENSG00000145494	NDUFS6	0.557069	1.43588e-105	6.2366e-101	0.51	0.339	NADH:ubiquinone oxidoreductase subunit S6 [Source:HGNC Symbol;Acc:HGNC:7713]	up
ENSG00000189159	JPT1	0.557906	1.55337e-105	6.74689e-101	0.4	0.223	Jupiter microtubule associated homolog 1 [Source:HGNC Symbol;Acc:HGNC:14569]	up
ENSG00000075618	FSCN1	-0.47537	1.58334e-105	6.87707e-101	0.084	0.218	fascin actin-bundling protein 1 [Source:HGNC Symbol;Acc:HGNC:11148]	down
ENSG00000126934	MAP2K2	0.532457	4.135e-105	1.79599e-100	0.371	0.2	mitogen-activated protein kinase kinase 2 [Source:HGNC Symbol;Acc:HGNC:6842]	up
ENSG00000030582	GRN	-0.424877	5.61529e-105	2.43895e-100	0.729	0.854	granulin precursor [Source:HGNC Symbol;Acc:HGNC:4601]	down
ENSG00000111786	SRSF9	0.552583	6.4174e-105	2.78733e-100	0.457	0.284	serine and arginine rich splicing factor 9 [Source:HGNC Symbol;Acc:HGNC:10791]	up
ENSG00000152795	HNRNPDL	0.488068	1.29732e-104	5.63477e-100	0.69	0.579	heterogeneous nuclear ribonucleoprotein D like [Source:HGNC Symbol;Acc:HGNC:5037]	up
ENSG00000123349	PFDN5	0.372472	1.43981e-104	6.25365e-100	0.913	0.891	prefoldin subunit 5 [Source:HGNC Symbol;Acc:HGNC:8869]	up
ENSG00000173905	GOLIM4	-0.536675	1.46221e-104	6.35098e-100	0.178	0.339	golgi integral membrane protein 4 [Source:HGNC Symbol;Acc:HGNC:15448]	down
ENSG00000176340	COX8A	0.4958	3.60227e-104	1.56461e-99	0.659	0.525	cytochrome c oxidase subunit 8A [Source:HGNC Symbol;Acc:HGNC:2294]	up
ENSG00000205364	MT1M	-0.508933	4.68534e-104	2.03503e-99	0.037	0.146	metallothionein 1M [Source:HGNC Symbol;Acc:HGNC:14296]	down
ENSG00000135124	P2RX4	0.574227	5.20186e-104	2.25938e-99	0.384	0.208	purinergic receptor P2X 4 [Source:HGNC Symbol;Acc:HGNC:8535]	up
ENSG00000183049	CAMK1D	-0.405282	8.552e-104	3.71448e-99	0.075	0.215	calcium/calmodulin dependent protein kinase ID [Source:HGNC Symbol;Acc:HGNC:19341]	down
ENSG00000107719	PALD1	-0.233927	1.18102e-103	5.12962e-99	0.006	0.072	phosphatase domain containing paladin 1 [Source:HGNC Symbol;Acc:HGNC:23530]	no_diff
ENSG00000170144	HNRNPA3	0.513722	1.38792e-103	6.0283e-99	0.638	0.496	heterogeneous nuclear ribonucleoprotein A3 [Source:HGNC Symbol;Acc:HGNC:24941]	up
ENSG00000168685	IL7R	0.523498	1.46707e-103	6.37208e-99	0.194	0.053	interleukin 7 receptor [Source:HGNC Symbol;Acc:HGNC:6024]	up
ENSG00000187210	GCNT1	-0.40224	1.6179e-103	7.02718e-99	0.063	0.19	glucosaminyl (N-acetyl) transferase 1 [Source:HGNC Symbol;Acc:HGNC:4203]	down
ENSG00000129515	SNX6	-0.508771	1.6799e-103	7.2965e-99	0.463	0.635	sorting nexin 6 [Source:HGNC Symbol;Acc:HGNC:14970]	down
ENSG00000138413	IDH1	-0.507158	2.08471e-103	9.05471e-99	0.178	0.352	isocitrate dehydrogenase (NADP(+)) 1, cytosolic [Source:HGNC Symbol;Acc:HGNC:5382]	down
ENSG00000279602	AC109326.1	0.421028	2.97885e-103	1.29383e-98	0.144	0.025	TEC	up
ENSG00000142507	PSMB6	0.539448	4.71394e-103	2.04745e-98	0.419	0.245	proteasome subunit beta 6 [Source:HGNC Symbol;Acc:HGNC:9543]	up
ENSG00000277632	CCL3	0.926683	5.32668e-103	2.31359e-98	0.643	0.555	C-C motif chemokine ligand 3 [Source:HGNC Symbol;Acc:HGNC:10627]	up
ENSG00000135624	CCT7	0.515054	1.14287e-102	4.96394e-98	0.289	0.125	chaperonin containing TCP1 subunit 7 [Source:HGNC Symbol;Acc:HGNC:1622]	up
ENSG00000178951	ZBTB7A	-0.528528	1.19661e-102	5.19735e-98	0.359	0.543	zinc finger and BTB domain containing 7A [Source:HGNC Symbol;Acc:HGNC:18078]	down
ENSG00000174748	RPL15	-0.393296	2.19751e-102	9.54466e-98	0.876	0.929	ribosomal protein L15 [Source:HGNC Symbol;Acc:HGNC:10306]	down
ENSG00000168701	TMEM208	0.493682	6.48255e-102	2.81563e-97	0.294	0.123	transmembrane protein 208 [Source:HGNC Symbol;Acc:HGNC:25015]	up
ENSG00000171766	GATM	-0.342681	8.05969e-102	3.50065e-97	0.033	0.138	glycine amidinotransferase [Source:HGNC Symbol;Acc:HGNC:4175]	down
ENSG00000176788	BASP1	0.745244	1.71161e-101	7.43422e-97	0.405	0.262	brain abundant membrane attached signal protein 1 [Source:HGNC Symbol;Acc:HGNC:957]	up
ENSG00000108298	RPL19	-0.356286	1.87629e-101	8.14946e-97	0.952	0.975	ribosomal protein L19 [Source:HGNC Symbol;Acc:HGNC:10312]	down
ENSG00000122378	PRXL2A	-0.317003	2.29733e-101	9.97823e-97	0.025	0.121	peroxiredoxin like 2A [Source:HGNC Symbol;Acc:HGNC:28651]	down
ENSG00000089195	TRMT6	0.490368	2.42076e-101	1.05143e-96	0.194	0.056	tRNA methyltransferase 6 [Source:HGNC Symbol;Acc:HGNC:20900]	up
ENSG00000189241	TSPYL1	-0.416859	3.31283e-101	1.4389e-96	0.08	0.219	TSPY like 1 [Source:HGNC Symbol;Acc:HGNC:12382]	down
ENSG00000162711	NLRP3	0.706193	3.55867e-101	1.54567e-96	0.432	0.27	NLR family pyrin domain containing 3 [Source:HGNC Symbol;Acc:HGNC:16400]	up
ENSG00000183779	ZNF703	-0.387144	3.95053e-101	1.71588e-96	0.069	0.199	zinc finger protein 703 [Source:HGNC Symbol;Acc:HGNC:25883]	down
ENSG00000210082	MT-RNR2	-0.303151	5.34721e-101	2.32251e-96	0.999	0.998	mitochondrially encoded 16S RNA [Source:HGNC Symbol;Acc:HGNC:7471]	down
ENSG00000173083	HPSE	0.534796	9.2749e-101	4.02846e-96	0.205	0.075	heparanase [Source:HGNC Symbol;Acc:HGNC:5164]	up
ENSG00000104549	SQLE	0.474406	1.35389e-100	5.88049e-96	0.167	0.039	squalene epoxidase [Source:HGNC Symbol;Acc:HGNC:11279]	up
ENSG00000102007	PLP2	0.564211	2.42659e-100	1.05396e-95	0.421	0.242	proteolipid protein 2 [Source:HGNC Symbol;Acc:HGNC:9087]	up
ENSG00000162734	PEA15	0.539268	6.79276e-100	2.95037e-95	0.342	0.165	proliferation and apoptosis adaptor protein 15 [Source:HGNC Symbol;Acc:HGNC:8822]	up
ENSG00000184588	PDE4B	0.667683	7.4611e-100	3.24066e-95	0.437	0.281	phosphodiesterase 4B [Source:HGNC Symbol;Acc:HGNC:8781]	up
ENSG00000249001	AC093895.1	0.30252	8.54669e-100	3.71217e-95	0.088	0.003	novel transcript	no_diff
ENSG00000168994	PXDC1	-0.354677	1.09574e-99	4.75924e-95	0.036	0.139	PX domain containing 1 [Source:HGNC Symbol;Acc:HGNC:21361]	down
ENSG00000078269	SYNJ2	0.412051	1.27784e-99	5.55016e-95	0.144	0.026	synaptojanin 2 [Source:HGNC Symbol;Acc:HGNC:11504]	up
ENSG00000161677	JOSD2	0.487618	2.14583e-99	9.32018e-95	0.277	0.112	Josephin domain containing 2 [Source:HGNC Symbol;Acc:HGNC:28853]	up
ENSG00000197019	SERTAD1	-0.505668	3.32175e-99	1.44277e-94	0.229	0.403	SERTA domain containing 1 [Source:HGNC Symbol;Acc:HGNC:17932]	down
ENSG00000198242	RPL23A	-0.430595	3.59615e-99	1.56195e-94	0.706	0.825	ribosomal protein L23a [Source:HGNC Symbol;Acc:HGNC:10317]	down
ENSG00000072135	PTPN18	-0.495776	4.2955e-99	1.86571e-94	0.256	0.44	protein tyrosine phosphatase, non-receptor type 18 [Source:HGNC Symbol;Acc:HGNC:9649]	down
ENSG00000100354	TNRC6B	-0.504745	4.72582e-99	2.05261e-94	0.216	0.399	trinucleotide repeat containing 6B [Source:HGNC Symbol;Acc:HGNC:29190]	down
ENSG00000116288	PARK7	0.520464	7.77743e-99	3.37805e-94	0.543	0.392	Parkinsonism associated deglycase [Source:HGNC Symbol;Acc:HGNC:16369]	up
ENSG00000065833	ME1	-0.431065	8.17675e-99	3.55149e-94	0.055	0.172	malic enzyme 1 [Source:HGNC Symbol;Acc:HGNC:6983]	down
ENSG00000069956	MAPK6	0.544179	1.26483e-98	5.49367e-94	0.321	0.154	mitogen-activated protein kinase 6 [Source:HGNC Symbol;Acc:HGNC:6879]	up
ENSG00000158457	TSPAN33	-0.370808	1.60916e-98	6.98923e-94	0.055	0.173	tetraspanin 33 [Source:HGNC Symbol;Acc:HGNC:28743]	down
ENSG00000169291	SHE	-0.207464	1.68197e-98	7.30548e-94	0.002	0.057	Src homology 2 domain containing E [Source:HGNC Symbol;Acc:HGNC:27004]	no_diff
ENSG00000156052	GNAQ	-0.449109	2.71246e-98	1.17813e-93	0.301	0.491	G protein subunit alpha q [Source:HGNC Symbol;Acc:HGNC:4390]	down
ENSG00000048471	SNX29	-0.443495	3.12119e-98	1.35566e-93	0.111	0.259	sorting nexin 29 [Source:HGNC Symbol;Acc:HGNC:30542]	down
ENSG00000234545	FAM133B	-0.526842	4.52285e-98	1.96445e-93	0.247	0.419	family with sequence similarity 133 member B [Source:HGNC Symbol;Acc:HGNC:28629]	down
ENSG00000151893	CACUL1	-0.467079	1.61414e-97	7.01086e-93	0.155	0.318	CDK2 associated cullin domain 1 [Source:HGNC Symbol;Acc:HGNC:23727]	down
ENSG00000115350	POLE4	0.527421	1.6581e-97	7.20179e-93	0.332	0.165	DNA polymerase epsilon 4, accessory subunit [Source:HGNC Symbol;Acc:HGNC:18755]	up
ENSG00000211459	MT-RNR1	-0.00376804	1.69866e-97	7.37795e-93	0.998	0.987	mitochondrially encoded 12S RNA [Source:HGNC Symbol;Acc:HGNC:7470]	no_diff
ENSG00000204252	HLA-DOA	-0.234264	2.00725e-97	8.71831e-93	0.007	0.074	major histocompatibility complex, class II, DO alpha [Source:HGNC Symbol;Acc:HGNC:4936]	no_diff
ENSG00000176845	METRNL	0.564042	2.3824e-97	1.03477e-92	0.521	0.356	meteorin like, glial cell differentiation regulator [Source:HGNC Symbol;Acc:HGNC:27584]	up
ENSG00000125772	GPCPD1	0.610902	2.69978e-97	1.17262e-92	0.402	0.256	glycerophosphocholine phosphodiesterase 1 [Source:HGNC Symbol;Acc:HGNC:26957]	up
ENSG00000171988	JMJD1C	0.515607	4.85771e-97	2.1099e-92	0.709	0.643	jumonji domain containing 1C [Source:HGNC Symbol;Acc:HGNC:12313]	up
ENSG00000181788	SIAH2	-0.489064	1.40211e-96	6.0899e-92	0.169	0.341	siah E3 ubiquitin protein ligase 2 [Source:HGNC Symbol;Acc:HGNC:10858]	down
ENSG00000116260	QSOX1	0.553574	1.90052e-96	8.25472e-92	0.311	0.155	quiescin sulfhydryl oxidase 1 [Source:HGNC Symbol;Acc:HGNC:9756]	up
ENSG00000124788	ATXN1	0.549346	3.82374e-96	1.6608e-91	0.342	0.177	ataxin 1 [Source:HGNC Symbol;Acc:HGNC:10548]	up
ENSG00000260027	HOXB7	-0.207542	7.26975e-96	3.15754e-91	0.003	0.058	homeobox B7 [Source:HGNC Symbol;Acc:HGNC:5118]	no_diff
ENSG00000151090	THRB	-0.246764	1.33128e-95	5.78228e-91	0.008	0.076	thyroid hormone receptor beta [Source:HGNC Symbol;Acc:HGNC:11799]	no_diff
ENSG00000198900	TOP1	0.545776	2.09513e-95	9.10001e-91	0.551	0.42	DNA topoisomerase I [Source:HGNC Symbol;Acc:HGNC:11986]	up
ENSG00000170515	PA2G4	0.540684	2.23821e-95	9.72143e-91	0.473	0.342	proliferation-associated 2G4 [Source:HGNC Symbol;Acc:HGNC:8550]	up
ENSG00000188313	PLSCR1	0.569856	3.81704e-95	1.65789e-90	0.385	0.232	phospholipid scramblase 1 [Source:HGNC Symbol;Acc:HGNC:9092]	up
ENSG00000148908	RGS10	-0.523026	4.09869e-95	1.78022e-90	0.39	0.538	regulator of G protein signaling 10 [Source:HGNC Symbol;Acc:HGNC:9992]	down
ENSG00000008083	JARID2	0.57166	5.15626e-95	2.23957e-90	0.414	0.278	jumonji and AT-rich interaction domain containing 2 [Source:HGNC Symbol;Acc:HGNC:6196]	up
ENSG00000134686	PHC2	0.563488	6.4866e-95	2.81739e-90	0.448	0.288	polyhomeotic homolog 2 [Source:HGNC Symbol;Acc:HGNC:3183]	up
ENSG00000120306	CYSTM1	0.486833	8.35736e-95	3.62994e-90	0.278	0.115	cysteine rich transmembrane module containing 1 [Source:HGNC Symbol;Acc:HGNC:30239]	up
ENSG00000105355	PLIN3	0.528817	8.56051e-95	3.71817e-90	0.426	0.258	perilipin 3 [Source:HGNC Symbol;Acc:HGNC:16893]	up
ENSG00000172216	CEBPB	0.451725	8.93553e-95	3.88106e-90	0.813	0.766	CCAAT enhancer binding protein beta [Source:HGNC Symbol;Acc:HGNC:1834]	up
ENSG00000196616	ADH1B	-0.291195	1.36758e-94	5.93993e-90	0.018	0.102	alcohol dehydrogenase 1B (class I), beta polypeptide [Source:HGNC Symbol;Acc:HGNC:250]	down
ENSG00000143013	LMO4	-0.50512	1.49103e-94	6.47614e-90	0.306	0.489	LIM domain only 4 [Source:HGNC Symbol;Acc:HGNC:6644]	down
ENSG00000105223	PLD3	-0.473012	1.64918e-94	7.16304e-90	0.369	0.564	phospholipase D family member 3 [Source:HGNC Symbol;Acc:HGNC:17158]	down
ENSG00000105808	RASA4	-0.259787	2.31354e-94	1.00486e-89	0.015	0.094	RAS p21 protein activator 4 [Source:HGNC Symbol;Acc:HGNC:23181]	no_diff
ENSG00000145685	LHFPL2	0.562639	2.47121e-94	1.07334e-89	0.459	0.3	LHFPL tetraspan subfamily member 2 [Source:HGNC Symbol;Acc:HGNC:6588]	up
ENSG00000204386	NEU1	-0.519303	2.63637e-94	1.14508e-89	0.206	0.374	neuraminidase 1 [Source:HGNC Symbol;Acc:HGNC:7758]	down
ENSG00000003436	TFPI	0.566421	3.08807e-94	1.34127e-89	0.247	0.099	tissue factor pathway inhibitor [Source:HGNC Symbol;Acc:HGNC:11760]	up
ENSG00000112343	TRIM38	-0.511636	4.20997e-94	1.82856e-89	0.324	0.51	tripartite motif containing 38 [Source:HGNC Symbol;Acc:HGNC:10059]	down
ENSG00000211892	IGHG4	-0.439101	4.65003e-94	2.01969e-89	0.048	0.144	immunoglobulin heavy constant gamma 4 (G4m marker) [Source:HGNC Symbol;Acc:HGNC:5528]	down
ENSG00000116251	RPL22	-0.427761	6.43468e-94	2.79484e-89	0.655	0.772	ribosomal protein L22 [Source:HGNC Symbol;Acc:HGNC:10315]	down
ENSG00000111145	ELK3	0.501475	6.87288e-94	2.98517e-89	0.269	0.115	ELK3, ETS transcription factor [Source:HGNC Symbol;Acc:HGNC:3325]	up
ENSG00000143079	CTTNBP2NL	-0.417658	7.85344e-94	3.41106e-89	0.099	0.243	CTTNBP2 N-terminal like [Source:HGNC Symbol;Acc:HGNC:25330]	down
ENSG00000096384	HSP90AB1	-0.269264	8.84178e-94	3.84034e-89	0.839	0.948	heat shock protein 90 alpha family class B member 1 [Source:HGNC Symbol;Acc:HGNC:5258]	down
ENSG00000171298	GAA	-0.460307	3.26414e-93	1.41775e-88	0.264	0.443	glucosidase alpha, acid [Source:HGNC Symbol;Acc:HGNC:4065]	down
ENSG00000104043	ATP8B4	-0.335114	4.51441e-93	1.96079e-88	0.058	0.175	ATPase phospholipid transporting 8B4 (putative) [Source:HGNC Symbol;Acc:HGNC:13536]	down
ENSG00000144597	EAF1	0.485518	6.33836e-93	2.753e-88	0.238	0.093	ELL associated factor 1 [Source:HGNC Symbol;Acc:HGNC:20907]	up
ENSG00000129235	TXNDC17	0.529143	7.37646e-93	3.20389e-88	0.432	0.269	thioredoxin domain containing 17 [Source:HGNC Symbol;Acc:HGNC:28218]	up
ENSG00000122257	RBBP6	-0.575703	8.43819e-93	3.66504e-88	0.387	0.55	RB binding protein 6, ubiquitin ligase [Source:HGNC Symbol;Acc:HGNC:9889]	down
ENSG00000085224	ATRX	-0.508637	1.0314e-92	4.4798e-88	0.354	0.528	ATRX, chromatin remodeler [Source:HGNC Symbol;Acc:HGNC:886]	down
ENSG00000123933	MXD4	-0.465807	2.57808e-92	1.11976e-87	0.17	0.332	MAX dimerization protein 4 [Source:HGNC Symbol;Acc:HGNC:13906]	down
ENSG00000118985	ELL2	0.586009	4.34197e-92	1.88589e-87	0.532	0.386	elongation factor for RNA polymerase II 2 [Source:HGNC Symbol;Acc:HGNC:17064]	up
ENSG00000136689	IL1RN	0.721331	4.64355e-92	2.01688e-87	0.252	0.103	interleukin 1 receptor antagonist [Source:HGNC Symbol;Acc:HGNC:6000]	up
ENSG00000072422	RHOBTB1	-0.320787	6.75543e-92	2.93415e-87	0.031	0.129	Rho related BTB domain containing 1 [Source:HGNC Symbol;Acc:HGNC:18738]	down
ENSG00000188042	ARL4C	-0.565597	6.79852e-92	2.95287e-87	0.249	0.431	ADP ribosylation factor like GTPase 4C [Source:HGNC Symbol;Acc:HGNC:698]	down
ENSG00000169313	P2RY12	-0.201582	6.89772e-92	2.99596e-87	0.006	0.066	purinergic receptor P2Y12 [Source:HGNC Symbol;Acc:HGNC:18124]	no_diff
ENSG00000064999	ANKS1A	-0.378802	9.22889e-92	4.00848e-87	0.072	0.2	ankyrin repeat and sterile alpha motif domain containing 1A [Source:HGNC Symbol;Acc:HGNC:20961]	down
ENSG00000143256	PFDN2	0.517721	9.64363e-92	4.18861e-87	0.389	0.226	prefoldin subunit 2 [Source:HGNC Symbol;Acc:HGNC:8867]	up
ENSG00000025434	NR1H3	-0.347891	9.69872e-92	4.21254e-87	0.04	0.144	nuclear receptor subfamily 1 group H member 3 [Source:HGNC Symbol;Acc:HGNC:7966]	down
ENSG00000175866	BAIAP2	-0.44638	1.06973e-91	4.64625e-87	0.076	0.204	BAI1 associated protein 2 [Source:HGNC Symbol;Acc:HGNC:947]	down
ENSG00000110172	CHORDC1	-0.540432	1.69777e-91	7.37408e-87	0.282	0.44	cysteine and histidine rich domain containing 1 [Source:HGNC Symbol;Acc:HGNC:14525]	down
ENSG00000115919	KYNU	0.565837	2.51368e-91	1.09179e-86	0.361	0.214	kynureninase [Source:HGNC Symbol;Acc:HGNC:6469]	up
ENSG00000146535	GNA12	0.458131	2.72905e-91	1.18533e-86	0.217	0.078	G protein subunit alpha 12 [Source:HGNC Symbol;Acc:HGNC:4380]	up
ENSG00000134352	IL6ST	-0.482525	3.12272e-91	1.35632e-86	0.216	0.386	interleukin 6 signal transducer [Source:HGNC Symbol;Acc:HGNC:6021]	down
ENSG00000111269	CREBL2	-0.39274	6.25376e-91	2.71626e-86	0.142	0.296	cAMP responsive element binding protein like 2 [Source:HGNC Symbol;Acc:HGNC:2350]	down
ENSG00000150779	TIMM8B	0.517501	8.1721e-91	3.54947e-86	0.409	0.252	translocase of inner mitochondrial membrane 8 homolog B [Source:HGNC Symbol;Acc:HGNC:11818]	up
ENSG00000104611	SH2D4A	-0.229949	1.054e-90	4.57795e-86	0.009	0.076	SH2 domain containing 4A [Source:HGNC Symbol;Acc:HGNC:26102]	no_diff
ENSG00000163131	CTSS	-0.263072	1.91793e-90	8.33034e-86	0.829	0.902	cathepsin S [Source:HGNC Symbol;Acc:HGNC:2545]	down
ENSG00000169554	ZEB2	0.452976	1.95431e-90	8.48833e-86	0.882	0.82	zinc finger E-box binding homeobox 2 [Source:HGNC Symbol;Acc:HGNC:14881]	up
ENSG00000167658	EEF2	-0.398107	2.19829e-90	9.54806e-86	0.752	0.843	eukaryotic translation elongation factor 2 [Source:HGNC Symbol;Acc:HGNC:3214]	down
ENSG00000177556	ATOX1	0.522978	8.31246e-90	3.61043e-85	0.45	0.276	antioxidant 1 copper chaperone [Source:HGNC Symbol;Acc:HGNC:798]	up
ENSG00000174080	CTSF	-0.233994	1.18649e-89	5.15342e-85	0.009	0.074	cathepsin F [Source:HGNC Symbol;Acc:HGNC:2531]	no_diff
ENSG00000197535	MYO5A	-0.50767	1.50793e-89	6.54953e-85	0.328	0.495	myosin VA [Source:HGNC Symbol;Acc:HGNC:7602]	down
ENSG00000198467	TPM2	-0.592561	2.77087e-89	1.2035e-84	0.132	0.247	tropomyosin 2 [Source:HGNC Symbol;Acc:HGNC:12011]	down
ENSG00000163736	PPBP	1.61238	4.13195e-89	1.79467e-84	0.068	0	pro-platelet basic protein [Source:HGNC Symbol;Acc:HGNC:9240]	no_diff
ENSG00000117461	PIK3R3	-0.30167	9.24051e-89	4.01352e-84	0.022	0.107	phosphoinositide-3-kinase regulatory subunit 3 [Source:HGNC Symbol;Acc:HGNC:8981]	down
ENSG00000088367	EPB41L1	-0.218577	9.28452e-89	4.03264e-84	0.006	0.064	erythrocyte membrane protein band 4.1 like 1 [Source:HGNC Symbol;Acc:HGNC:3378]	no_diff
ENSG00000107263	RAPGEF1	0.516673	1.24295e-88	5.39865e-84	0.354	0.199	Rap guanine nucleotide exchange factor 1 [Source:HGNC Symbol;Acc:HGNC:4568]	up
ENSG00000135821	GLUL	0.427861	1.49348e-88	6.48676e-84	0.834	0.834	glutamate-ammonia ligase [Source:HGNC Symbol;Acc:HGNC:4341]	up
ENSG00000113387	SUB1	0.471986	2.87062e-88	1.24683e-83	0.619	0.496	SUB1 homolog, transcriptional regulator [Source:HGNC Symbol;Acc:HGNC:19985]	up
ENSG00000184584	TMEM173	-0.375038	3.28775e-88	1.428e-83	0.113	0.254	transmembrane protein 173 [Source:HGNC Symbol;Acc:HGNC:27962]	down
ENSG00000140022	STON2	-0.192221	4.08922e-88	1.77611e-83	0.004	0.057	stonin 2 [Source:HGNC Symbol;Acc:HGNC:30652]	no_diff
ENSG00000141753	IGFBP4	-0.456145	4.59794e-88	1.99707e-83	0.089	0.222	insulin like growth factor binding protein 4 [Source:HGNC Symbol;Acc:HGNC:5473]	down
ENSG00000001084	GCLC	-0.385946	1.0551e-87	4.58274e-83	0.073	0.192	glutamate-cysteine ligase catalytic subunit [Source:HGNC Symbol;Acc:HGNC:4311]	down
ENSG00000108679	LGALS3BP	-0.340513	1.22553e-87	5.32297e-83	0.036	0.133	galectin 3 binding protein [Source:HGNC Symbol;Acc:HGNC:6564]	down
ENSG00000155307	SAMSN1	0.578768	1.66888e-87	7.24863e-83	0.49	0.413	SAM domain, SH3 domain and nuclear localization signals 1 [Source:HGNC Symbol;Acc:HGNC:10528]	up
ENSG00000175352	NRIP3	0.330601	2.35961e-87	1.02487e-82	0.108	0.014	nuclear receptor interacting protein 3 [Source:HGNC Symbol;Acc:HGNC:1167]	up
ENSG00000110651	CD81	-0.486233	7.95583e-87	3.45553e-82	0.521	0.687	CD81 molecule [Source:HGNC Symbol;Acc:HGNC:1701]	down
ENSG00000240370	RPL13P5	-0.391066	9.81856e-87	4.26459e-82	0.055	0.155	ribosomal protein L13 pseudogene 5 [Source:HGNC Symbol;Acc:HGNC:30363]	down
ENSG00000071859	FAM50A	0.498174	1.19819e-86	5.20421e-82	0.395	0.231	family with sequence similarity 50 member A [Source:HGNC Symbol;Acc:HGNC:18786]	up
ENSG00000165030	NFIL3	0.557485	1.99038e-86	8.64503e-82	0.386	0.229	nuclear factor, interleukin 3 regulated [Source:HGNC Symbol;Acc:HGNC:7787]	up
ENSG00000242498	ARPIN	-0.31439	2.57481e-86	1.11834e-81	0.046	0.151	actin related protein 2/3 complex inhibitor [Source:HGNC Symbol;Acc:HGNC:28782]	down
ENSG00000137154	RPS6	-0.349367	3.16889e-86	1.37638e-81	0.932	0.961	ribosomal protein S6 [Source:HGNC Symbol;Acc:HGNC:10429]	down
ENSG00000182749	PAQR7	-0.201793	4.79498e-86	2.08265e-81	0.007	0.068	progestin and adipoQ receptor family member 7 [Source:HGNC Symbol;Acc:HGNC:23146]	no_diff
ENSG00000196262	PPIA	0.33933	7.88796e-86	3.42606e-81	0.823	0.806	peptidylprolyl isomerase A [Source:HGNC Symbol;Acc:HGNC:9253]	up
ENSG00000105993	DNAJB6	-0.472487	8.17388e-86	3.55024e-81	0.586	0.684	DnaJ heat shock protein family (Hsp40) member B6 [Source:HGNC Symbol;Acc:HGNC:14888]	down
ENSG00000071051	NCK2	-0.326667	8.86779e-86	3.85164e-81	0.049	0.157	NCK adaptor protein 2 [Source:HGNC Symbol;Acc:HGNC:7665]	down
ENSG00000171680	PLEKHG5	-0.193475	9.09274e-86	3.94934e-81	0.002	0.048	pleckstrin homology and RhoGEF domain containing G5 [Source:HGNC Symbol;Acc:HGNC:29105]	no_diff
ENSG00000181631	P2RY13	-0.307478	1.26808e-85	5.50779e-81	0.038	0.136	purinergic receptor P2Y13 [Source:HGNC Symbol;Acc:HGNC:4537]	down
ENSG00000114738	MAPKAPK3	0.464637	1.39254e-85	6.04836e-81	0.29	0.137	mitogen-activated protein kinase-activated protein kinase 3 [Source:HGNC Symbol;Acc:HGNC:6888]	up
ENSG00000186416	NKRF	-0.434614	1.87464e-85	8.14232e-81	0.107	0.239	NFKB repressing factor [Source:HGNC Symbol;Acc:HGNC:19374]	down
ENSG00000118181	RPS25	-0.386054	2.35006e-85	1.02072e-80	0.782	0.859	ribosomal protein S25 [Source:HGNC Symbol;Acc:HGNC:10413]	down
ENSG00000124145	SDC4	0.46637	2.42202e-85	1.05198e-80	0.192	0.063	syndecan 4 [Source:HGNC Symbol;Acc:HGNC:10661]	up
ENSG00000168615	ADAM9	0.512342	3.04245e-85	1.32146e-80	0.448	0.289	ADAM metallopeptidase domain 9 [Source:HGNC Symbol;Acc:HGNC:216]	up
ENSG00000114999	TTL	-0.431939	5.15239e-85	2.23789e-80	0.096	0.224	tubulin tyrosine ligase [Source:HGNC Symbol;Acc:HGNC:21586]	down
ENSG00000173451	THAP2	0.450074	5.71277e-85	2.48129e-80	0.194	0.064	THAP domain containing 2 [Source:HGNC Symbol;Acc:HGNC:20854]	up
ENSG00000168769	TET2	0.524408	7.35165e-85	3.19311e-80	0.452	0.348	tet methylcytosine dioxygenase 2 [Source:HGNC Symbol;Acc:HGNC:25941]	up
ENSG00000053918	KCNQ1	-0.340072	8.99375e-85	3.90635e-80	0.059	0.172	potassium voltage-gated channel subfamily Q member 1 [Source:HGNC Symbol;Acc:HGNC:6294]	down
ENSG00000168421	RHOH	0.349099	1.09973e-84	4.77656e-80	0.104	0.013	ras homolog family member H [Source:HGNC Symbol;Acc:HGNC:686]	up
ENSG00000139679	LPAR6	-0.456474	1.87017e-84	8.12291e-80	0.191	0.353	lysophosphatidic acid receptor 6 [Source:HGNC Symbol;Acc:HGNC:15520]	down
ENSG00000177706	FAM20C	0.502472	2.17963e-84	9.46701e-80	0.284	0.143	FAM20C, golgi associated secretory pathway kinase [Source:HGNC Symbol;Acc:HGNC:22140]	up
ENSG00000118515	SGK1	0.612286	2.97931e-84	1.29403e-79	0.556	0.416	serum/glucocorticoid regulated kinase 1 [Source:HGNC Symbol;Acc:HGNC:10810]	up
ENSG00000070831	CDC42	0.378092	5.5904e-84	2.42813e-79	0.796	0.726	cell division cycle 42 [Source:HGNC Symbol;Acc:HGNC:1736]	up
ENSG00000198668	CALM1	0.332055	6.20823e-84	2.69648e-79	0.886	0.872	calmodulin 1 [Source:HGNC Symbol;Acc:HGNC:1442]	up
ENSG00000166710	B2M	-0.19344	6.3579e-84	2.76149e-79	0.991	0.996	beta-2-microglobulin [Source:HGNC Symbol;Acc:HGNC:914]	no_diff
ENSG00000060558	GNA15	0.479084	7.04264e-84	3.0589e-79	0.313	0.155	G protein subunit alpha 15 [Source:HGNC Symbol;Acc:HGNC:4383]	up
ENSG00000182899	RPL35A	-0.368119	8.78768e-84	3.81684e-79	0.877	0.932	ribosomal protein L35a [Source:HGNC Symbol;Acc:HGNC:10345]	down
ENSG00000187116	LILRA5	0.521311	9.6824e-84	4.20545e-79	0.174	0.058	leukocyte immunoglobulin like receptor A5 [Source:HGNC Symbol;Acc:HGNC:16309]	up
ENSG00000164125	GASK1B	-0.407883	1.07546e-83	4.67114e-79	0.233	0.401	golgi associated kinase 1B [Source:HGNC Symbol;Acc:HGNC:25312]	down
ENSG00000143119	CD53	0.454355	1.15322e-83	5.00889e-79	0.671	0.551	CD53 molecule [Source:HGNC Symbol;Acc:HGNC:1686]	up
ENSG00000196419	XRCC6	0.487218	1.27435e-83	5.53502e-79	0.466	0.319	X-ray repair cross complementing 6 [Source:HGNC Symbol;Acc:HGNC:4055]	up
ENSG00000196935	SRGAP1	-0.436139	1.32135e-83	5.73916e-79	0.121	0.263	SLIT-ROBO Rho GTPase activating protein 1 [Source:HGNC Symbol;Acc:HGNC:17382]	down
ENSG00000108960	MMD	-0.382438	1.50244e-83	6.52571e-79	0.075	0.192	monocyte to macrophage differentiation associated [Source:HGNC Symbol;Acc:HGNC:7153]	down
ENSG00000131389	SLC6A6	0.481802	2.07713e-83	9.02179e-79	0.318	0.162	solute carrier family 6 member 6 [Source:HGNC Symbol;Acc:HGNC:11052]	up
ENSG00000167680	SEMA6B	0.525376	2.33082e-83	1.01237e-78	0.216	0.085	semaphorin 6B [Source:HGNC Symbol;Acc:HGNC:10739]	up
ENSG00000168172	HOOK3	-0.450625	2.47956e-83	1.07697e-78	0.289	0.46	hook microtubule tethering protein 3 [Source:HGNC Symbol;Acc:HGNC:23576]	down
ENSG00000042317	SPATA7	-0.245977	4.56016e-83	1.98066e-78	0.011	0.076	spermatogenesis associated 7 [Source:HGNC Symbol;Acc:HGNC:20423]	no_diff
ENSG00000105404	RABAC1	0.504882	5.45174e-83	2.36791e-78	0.421	0.261	Rab acceptor 1 [Source:HGNC Symbol;Acc:HGNC:9794]	up
ENSG00000173442	EHBP1L1	0.493867	7.89387e-83	3.42862e-78	0.393	0.231	EH domain binding protein 1 like 1 [Source:HGNC Symbol;Acc:HGNC:30682]	up
ENSG00000141582	CBX4	-0.437451	9.75052e-83	4.23504e-78	0.166	0.317	chromobox 4 [Source:HGNC Symbol;Acc:HGNC:1554]	down
ENSG00000136810	TXN	0.495754	9.88007e-83	4.29131e-78	0.574	0.426	thioredoxin [Source:HGNC Symbol;Acc:HGNC:12435]	up
ENSG00000173198	CYSLTR1	-0.266947	1.37003e-82	5.95057e-78	0.025	0.109	cysteinyl leukotriene receptor 1 [Source:HGNC Symbol;Acc:HGNC:17451]	down
ENSG00000109736	MFSD10	0.436792	1.86469e-82	8.09909e-78	0.253	0.108	major facilitator superfamily domain containing 10 [Source:HGNC Symbol;Acc:HGNC:16894]	up
ENSG00000178562	CD28	-0.330265	2.44802e-82	1.06327e-77	0.024	0.101	CD28 molecule [Source:HGNC Symbol;Acc:HGNC:1653]	down
ENSG00000136111	TBC1D4	-0.274693	2.64164e-82	1.14737e-77	0.022	0.101	TBC1 domain family member 4 [Source:HGNC Symbol;Acc:HGNC:19165]	down
ENSG00000131174	COX7B	0.47082	2.64177e-82	1.14743e-77	0.566	0.43	cytochrome c oxidase subunit 7B [Source:HGNC Symbol;Acc:HGNC:2291]	up
ENSG00000144115	THNSL2	-0.200293	2.65157e-82	1.15168e-77	0.006	0.063	threonine synthase like 2 [Source:HGNC Symbol;Acc:HGNC:25602]	no_diff
ENSG00000175048	ZDHHC14	-0.263869	2.82169e-82	1.22557e-77	0.022	0.1	zinc finger DHHC-type containing 14 [Source:HGNC Symbol;Acc:HGNC:20341]	down
ENSG00000198959	TGM2	0.475079	3.22425e-82	1.40042e-77	0.152	0.041	transglutaminase 2 [Source:HGNC Symbol;Acc:HGNC:11778]	up
ENSG00000145675	PIK3R1	-0.419058	4.15832e-82	1.80612e-77	0.319	0.496	phosphoinositide-3-kinase regulatory subunit 1 [Source:HGNC Symbol;Acc:HGNC:8979]	down
ENSG00000182957	SPATA13	0.488333	4.34021e-82	1.88513e-77	0.163	0.048	spermatogenesis associated 13 [Source:HGNC Symbol;Acc:HGNC:23222]	up
ENSG00000173517	PEAK1	-0.40855	5.21369e-82	2.26452e-77	0.074	0.192	pseudopodium enriched atypical kinase 1 [Source:HGNC Symbol;Acc:HGNC:29431]	down
ENSG00000198399	ITSN2	-0.458297	7.04296e-82	3.05904e-77	0.306	0.474	intersectin 2 [Source:HGNC Symbol;Acc:HGNC:6184]	down
ENSG00000259379	MTND5P32	0.446732	7.26086e-82	3.15368e-77	0.161	0.044	MT-ND5 pseudogene 32 [Source:HGNC Symbol;Acc:HGNC:51951]	up
ENSG00000173821	AC124319.1	-0.458525	1.09096e-81	4.73849e-77	0.375	0.547	ring finger protein 213 [Source:NCBI gene;Acc:57674]	down
ENSG00000184007	PTP4A2	0.453022	1.81757e-81	7.89443e-77	0.666	0.536	protein tyrosine phosphatase type IVA, member 2 [Source:HGNC Symbol;Acc:HGNC:9635]	up
ENSG00000160305	DIP2A	-0.401291	2.9678e-81	1.28903e-76	0.097	0.227	disco interacting protein 2 homolog A [Source:HGNC Symbol;Acc:HGNC:17217]	down
ENSG00000150337	FCGR1A	0.491274	2.97438e-81	1.29189e-76	0.272	0.127	Fc fragment of IgG receptor Ia [Source:HGNC Symbol;Acc:HGNC:3613]	up
ENSG00000113269	RNF130	-0.428244	3.61652e-81	1.5708e-76	0.521	0.67	ring finger protein 130 [Source:HGNC Symbol;Acc:HGNC:18280]	down
ENSG00000104765	BNIP3L	-0.313325	3.69478e-81	1.60479e-76	0.421	0.591	BCL2 interacting protein 3 like [Source:HGNC Symbol;Acc:HGNC:1085]	down
ENSG00000174238	PITPNA	0.459654	6.83062e-81	2.96681e-76	0.318	0.161	phosphatidylinositol transfer protein alpha [Source:HGNC Symbol;Acc:HGNC:9001]	up
ENSG00000188846	RPL14	-0.349994	7.38568e-81	3.2079e-76	0.869	0.926	ribosomal protein L14 [Source:HGNC Symbol;Acc:HGNC:10305]	down
ENSG00000136527	TRA2B	-0.449298	8.54247e-81	3.71034e-76	0.606	0.742	transformer 2 beta homolog [Source:HGNC Symbol;Acc:HGNC:10781]	down
ENSG00000105855	ITGB8	0.396534	1.80956e-80	7.85966e-76	0.094	0.011	integrin subunit beta 8 [Source:HGNC Symbol;Acc:HGNC:6163]	no_diff
ENSG00000179914	ITLN1	-0.403174	1.95097e-80	8.47384e-76	0.002	0.048	intelectin 1 [Source:HGNC Symbol;Acc:HGNC:18259]	no_diff
ENSG00000135940	COX5B	0.43192	2.02738e-80	8.80572e-76	0.676	0.563	cytochrome c oxidase subunit 5B [Source:HGNC Symbol;Acc:HGNC:2269]	up
ENSG00000185088	RPS27L	0.510023	2.20967e-80	9.5975e-76	0.576	0.453	ribosomal protein S27 like [Source:HGNC Symbol;Acc:HGNC:18476]	up
ENSG00000156535	CD109	0.363921	2.24737e-80	9.76121e-76	0.133	0.03	CD109 molecule [Source:HGNC Symbol;Acc:HGNC:21685]	up
ENSG00000162946	DISC1	-0.23126	2.55816e-80	1.11111e-75	0.021	0.098	DISC1 scaffold protein [Source:HGNC Symbol;Acc:HGNC:2888]	no_diff
ENSG00000107957	SH3PXD2A	-0.306894	2.88028e-80	1.25102e-75	0.037	0.13	SH3 and PX domains 2A [Source:HGNC Symbol;Acc:HGNC:23664]	down
ENSG00000010256	UQCRC1	0.488455	3.03361e-80	1.31762e-75	0.405	0.248	ubiquinol-cytochrome c reductase core protein 1 [Source:HGNC Symbol;Acc:HGNC:12585]	up
ENSG00000152818	UTRN	-0.426297	3.96139e-80	1.72059e-75	0.25	0.419	utrophin [Source:HGNC Symbol;Acc:HGNC:12635]	down
ENSG00000244754	N4BP2L2	-0.468333	4.48146e-80	1.94648e-75	0.36	0.525	NEDD4 binding protein 2 like 2 [Source:HGNC Symbol;Acc:HGNC:26916]	down
ENSG00000140749	IGSF6	-0.511421	6.89174e-80	2.99336e-75	0.25	0.418	immunoglobulin superfamily member 6 [Source:HGNC Symbol;Acc:HGNC:5953]	down
ENSG00000187554	TLR5	-0.365778	7.85423e-80	3.4114e-75	0.076	0.194	toll like receptor 5 [Source:HGNC Symbol;Acc:HGNC:11851]	down
ENSG00000230989	HSBP1	0.477825	1.20089e-79	5.21595e-75	0.549	0.414	heat shock factor binding protein 1 [Source:HGNC Symbol;Acc:HGNC:5203]	up
ENSG00000138185	ENTPD1	-0.268066	1.35296e-79	5.87646e-75	0.08	0.192	ectonucleoside triphosphate diphosphohydrolase 1 [Source:HGNC Symbol;Acc:HGNC:3363]	down
ENSG00000147403	RPL10	-0.321741	1.57717e-79	6.85027e-75	0.958	0.982	ribosomal protein L10 [Source:HGNC Symbol;Acc:HGNC:10298]	down
ENSG00000233237	LINC00472	-0.207086	1.67894e-79	7.29231e-75	0.003	0.049	long intergenic non-protein coding RNA 472 [Source:HGNC Symbol;Acc:HGNC:21380]	no_diff
ENSG00000110721	CHKA	-0.36947	1.85672e-79	8.06447e-75	0.088	0.207	choline kinase alpha [Source:HGNC Symbol;Acc:HGNC:1937]	down
ENSG00000141543	EIF4A3	-0.469753	2.81703e-79	1.22355e-74	0.254	0.378	eukaryotic translation initiation factor 4A3 [Source:HGNC Symbol;Acc:HGNC:18683]	down
ENSG00000168807	SNTB2	-0.321168	3.20448e-79	1.39183e-74	0.042	0.139	syntrophin beta 2 [Source:HGNC Symbol;Acc:HGNC:11169]	down
ENSG00000196605	ZNF846	-0.238816	3.80609e-79	1.65314e-74	0.021	0.097	zinc finger protein 846 [Source:HGNC Symbol;Acc:HGNC:27260]	no_diff
ENSG00000140403	DNAJA4	-0.576536	4.49074e-79	1.95051e-74	0.177	0.306	DnaJ heat shock protein family (Hsp40) member A4 [Source:HGNC Symbol;Acc:HGNC:14885]	down
ENSG00000155324	GRAMD2B	-0.232241	6.04974e-79	2.62764e-74	0.015	0.083	GRAM domain containing 2B [Source:HGNC Symbol;Acc:HGNC:24911]	no_diff
ENSG00000106366	SERPINE1	0.365827	1.59887e-78	6.94454e-74	0.151	0.041	serpin family E member 1 [Source:HGNC Symbol;Acc:HGNC:8583]	up
ENSG00000155660	PDIA4	0.53679	1.75852e-78	7.63794e-74	0.362	0.206	protein disulfide isomerase family A member 4 [Source:HGNC Symbol;Acc:HGNC:30167]	up
ENSG00000136104	RNASEH2B	-0.398026	1.77889e-78	7.72643e-74	0.133	0.27	ribonuclease H2 subunit B [Source:HGNC Symbol;Acc:HGNC:25671]	down
ENSG00000116649	SRM	0.493904	1.91063e-78	8.29862e-74	0.289	0.148	spermidine synthase [Source:HGNC Symbol;Acc:HGNC:11296]	up
ENSG00000171862	PTEN	-0.43964	2.14343e-78	9.30979e-74	0.241	0.4	phosphatase and tensin homolog [Source:HGNC Symbol;Acc:HGNC:9588]	down
ENSG00000041357	PSMA4	0.476957	3.77195e-78	1.63831e-73	0.455	0.301	proteasome subunit alpha 4 [Source:HGNC Symbol;Acc:HGNC:9533]	up
ENSG00000143924	EML4	0.482922	4.5604e-78	1.98076e-73	0.323	0.173	EMAP like 4 [Source:HGNC Symbol;Acc:HGNC:1316]	up
ENSG00000242086	MUC20-OT1	-0.41436	5.42347e-78	2.35563e-73	0.13	0.268	MUC20 overlapping transcript [Source:HGNC Symbol;Acc:HGNC:53807]	down
ENSG00000136250	AOAH	-0.293907	6.22829e-78	2.7052e-73	0.097	0.22	acyloxyacyl hydrolase [Source:HGNC Symbol;Acc:HGNC:548]	down
ENSG00000155115	GTF3C6	0.469597	9.12676e-78	3.96412e-73	0.374	0.222	general transcription factor IIIC subunit 6 [Source:HGNC Symbol;Acc:HGNC:20872]	up
ENSG00000100365	NCF4	-0.451604	1.00954e-77	4.38482e-73	0.299	0.463	neutrophil cytosolic factor 4 [Source:HGNC Symbol;Acc:HGNC:7662]	down
ENSG00000114374	USP9Y	-0.341768	1.01389e-77	4.40374e-73	0.047	0.143	ubiquitin specific peptidase 9 Y-linked [Source:HGNC Symbol;Acc:HGNC:12633]	down
ENSG00000132780	NASP	-0.469197	1.23183e-77	5.35032e-73	0.265	0.419	nuclear autoantigenic sperm protein [Source:HGNC Symbol;Acc:HGNC:7644]	down
ENSG00000111843	TMEM14C	-0.422461	1.48319e-77	6.44207e-73	0.212	0.368	transmembrane protein 14C [Source:HGNC Symbol;Acc:HGNC:20952]	down
ENSG00000137767	SQOR	0.465968	2.20974e-77	9.59779e-73	0.305	0.163	sulfide quinone oxidoreductase [Source:HGNC Symbol;Acc:HGNC:20390]	up
ENSG00000261429	DPPA2P4	-0.162081	2.26357e-77	9.83161e-73	0.003	0.05	developmental pluripotency associated 2 pseudogene 4 [Source:HGNC Symbol;Acc:HGNC:44629]	no_diff
ENSG00000163739	CXCL1	0.718186	3.2825e-77	1.42572e-72	0.159	0.049	C-X-C motif chemokine ligand 1 [Source:HGNC Symbol;Acc:HGNC:4602]	up
ENSG00000010322	NISCH	-0.435137	4.1707e-77	1.8115e-72	0.156	0.301	nischarin [Source:HGNC Symbol;Acc:HGNC:18006]	down
ENSG00000203747	FCGR3A	0.49985	5.25813e-77	2.28382e-72	0.667	0.563	Fc fragment of IgG receptor IIIa [Source:HGNC Symbol;Acc:HGNC:3619]	up
ENSG00000169223	LMAN2	0.463362	5.81624e-77	2.52623e-72	0.4	0.245	lectin, mannose binding 2 [Source:HGNC Symbol;Acc:HGNC:16986]	up
ENSG00000106400	ZNHIT1	0.470286	8.47942e-77	3.68295e-72	0.43	0.293	zinc finger HIT-type containing 1 [Source:HGNC Symbol;Acc:HGNC:21688]	up
ENSG00000173209	AHSA2P	-0.389193	8.83795e-77	3.83868e-72	0.079	0.195	activator of HSP90 ATPase homolog 2, pseudogene [Source:HGNC Symbol;Acc:HGNC:20437]	down
ENSG00000142687	KIAA0319L	-0.372923	9.57645e-77	4.15943e-72	0.086	0.206	KIAA0319 like [Source:HGNC Symbol;Acc:HGNC:30071]	down
ENSG00000152583	SPARCL1	-0.496091	9.82409e-77	4.26699e-72	0.122	0.254	SPARC like 1 [Source:HGNC Symbol;Acc:HGNC:11220]	down
ENSG00000230590	FTX	-0.383919	1.26686e-76	5.50246e-72	0.103	0.227	FTX transcript, XIST regulator [Source:HGNC Symbol;Acc:HGNC:37190]	down
ENSG00000163513	TGFBR2	-0.408303	1.30096e-76	5.6506e-72	0.214	0.372	transforming growth factor beta receptor 2 [Source:HGNC Symbol;Acc:HGNC:11773]	down
ENSG00000120457	KCNJ5	-0.217235	1.44201e-76	6.26325e-72	0.011	0.071	potassium voltage-gated channel subfamily J member 5 [Source:HGNC Symbol;Acc:HGNC:6266]	no_diff
ENSG00000156467	UQCRB	-0.394504	1.55489e-76	6.75353e-72	0.668	0.782	ubiquinol-cytochrome c reductase binding protein [Source:HGNC Symbol;Acc:HGNC:12582]	down
ENSG00000100350	FOXRED2	-0.199897	2.4375e-76	1.05871e-71	0.012	0.076	FAD dependent oxidoreductase domain containing 2 [Source:HGNC Symbol;Acc:HGNC:26264]	no_diff
ENSG00000232956	SNHG15	0.493531	3.42636e-76	1.48821e-71	0.317	0.173	small nucleolar RNA host gene 15 [Source:HGNC Symbol;Acc:HGNC:27797]	up
ENSG00000147526	TACC1	-0.44415	3.4365e-76	1.49261e-71	0.473	0.624	transforming acidic coiled-coil containing protein 1 [Source:HGNC Symbol;Acc:HGNC:11522]	down
ENSG00000105516	DBP	-0.238074	3.85695e-76	1.67523e-71	0.017	0.086	D-box binding PAR bZIP transcription factor [Source:HGNC Symbol;Acc:HGNC:2697]	no_diff
ENSG00000137726	FXYD6	-0.35587	4.06954e-76	1.76756e-71	0.037	0.124	FXYD domain containing ion transport regulator 6 [Source:HGNC Symbol;Acc:HGNC:4030]	down
ENSG00000196743	GM2A	-0.354083	4.08326e-76	1.77352e-71	0.155	0.292	GM2 ganglioside activator [Source:HGNC Symbol;Acc:HGNC:4367]	down
ENSG00000112335	SNX3	-0.418451	7.2471e-76	3.14771e-71	0.496	0.638	sorting nexin 3 [Source:HGNC Symbol;Acc:HGNC:11174]	down
ENSG00000105643	ARRDC2	-0.362383	7.78721e-76	3.3823e-71	0.088	0.21	arrestin domain containing 2 [Source:HGNC Symbol;Acc:HGNC:25225]	down
ENSG00000032219	ARID4A	-0.461338	9.55624e-76	4.15066e-71	0.239	0.396	AT-rich interaction domain 4A [Source:HGNC Symbol;Acc:HGNC:9885]	down
ENSG00000033800	PIAS1	-0.394476	1.31925e-75	5.73004e-71	0.187	0.332	protein inhibitor of activated STAT 1 [Source:HGNC Symbol;Acc:HGNC:2752]	down
ENSG00000163106	HPGDS	-0.281758	2.41635e-75	1.04952e-70	0.018	0.087	hematopoietic prostaglandin D synthase [Source:HGNC Symbol;Acc:HGNC:17890]	no_diff
ENSG00000106066	CPVL	-0.397884	6.34981e-75	2.75798e-70	0.336	0.503	carboxypeptidase, vitellogenic like [Source:HGNC Symbol;Acc:HGNC:14399]	down
ENSG00000135968	GCC2	-0.477488	6.76516e-75	2.93838e-70	0.268	0.425	GRIP and coiled-coil domain containing 2 [Source:HGNC Symbol;Acc:HGNC:23218]	down
ENSG00000156968	MPV17L	-0.217109	7.5829e-75	3.29356e-70	0.015	0.082	MPV17 mitochondrial inner membrane protein like [Source:HGNC Symbol;Acc:HGNC:26827]	no_diff
ENSG00000197520	FAM177B	-0.147306	1.17871e-74	5.11963e-70	0.002	0.043	family with sequence similarity 177 member B [Source:HGNC Symbol;Acc:HGNC:34395]	no_diff
ENSG00000225008	AC234781.2	-0.166649	1.76437e-74	7.66338e-70	0.003	0.05	Twinfilin-1, pseudogene	no_diff
ENSG00000136051	WASHC4	-0.417818	1.94797e-74	8.4608e-70	0.274	0.438	WASH complex subunit 4 [Source:HGNC Symbol;Acc:HGNC:29174]	down
ENSG00000108106	UBE2S	-0.435048	2.27732e-74	9.89131e-70	0.212	0.358	ubiquitin conjugating enzyme E2 S [Source:HGNC Symbol;Acc:HGNC:17895]	down
ENSG00000131981	LGALS3	0.512555	2.63548e-74	1.14469e-69	0.674	0.563	galectin 3 [Source:HGNC Symbol;Acc:HGNC:6563]	up
ENSG00000108582	CPD	0.481793	2.918e-74	1.26741e-69	0.266	0.13	carboxypeptidase D [Source:HGNC Symbol;Acc:HGNC:2301]	up
ENSG00000213145	CRIP1	0.613757	3.73969e-74	1.6243e-69	0.232	0.108	cysteine rich protein 1 [Source:HGNC Symbol;Acc:HGNC:2360]	up
ENSG00000168542	COL3A1	0.505209	7.73367e-74	3.35904e-69	0.13	0.036	collagen type III alpha 1 chain [Source:HGNC Symbol;Acc:HGNC:2201]	up
ENSG00000130255	RPL36	-0.313512	7.74072e-74	3.3621e-69	0.926	0.948	ribosomal protein L36 [Source:HGNC Symbol;Acc:HGNC:13631]	down
ENSG00000177663	IL17RA	-0.392786	7.94811e-74	3.45218e-69	0.207	0.361	interleukin 17 receptor A [Source:HGNC Symbol;Acc:HGNC:5985]	down
ENSG00000173542	MOB1B	-0.380307	8.00121e-74	3.47525e-69	0.1	0.222	MOB kinase activator 1B [Source:HGNC Symbol;Acc:HGNC:29801]	down
ENSG00000165025	SYK	-0.420531	9.6431e-74	4.18838e-69	0.346	0.505	spleen associated tyrosine kinase [Source:HGNC Symbol;Acc:HGNC:11491]	down
ENSG00000175756	AURKAIP1	0.448571	9.91478e-74	4.30639e-69	0.496	0.358	aurora kinase A interacting protein 1 [Source:HGNC Symbol;Acc:HGNC:24114]	up
ENSG00000051128	HOMER3	0.445861	1.02289e-73	4.44283e-69	0.299	0.152	homer scaffold protein 3 [Source:HGNC Symbol;Acc:HGNC:17514]	up
ENSG00000123095	BHLHE41	-0.303376	1.0341e-73	4.49153e-69	0.029	0.11	basic helix-loop-helix family member e41 [Source:HGNC Symbol;Acc:HGNC:16617]	down
ENSG00000117298	ECE1	0.321307	1.20515e-73	5.23445e-69	0.108	0.019	endothelin converting enzyme 1 [Source:HGNC Symbol;Acc:HGNC:3146]	up
ENSG00000157514	TSC22D3	-0.41783	1.37784e-73	5.98451e-69	0.616	0.753	TSC22 domain family member 3 [Source:HGNC Symbol;Acc:HGNC:3051]	down
ENSG00000244682	FCGR2C	-0.305996	1.83853e-73	7.98549e-69	0.065	0.169	Fc fragment of IgG receptor IIc (gene/pseudogene) [Source:HGNC Symbol;Acc:HGNC:15626]	down
ENSG00000101220	C20orf27	-0.386659	2.2056e-73	9.57979e-69	0.149	0.285	chromosome 20 open reading frame 27 [Source:HGNC Symbol;Acc:HGNC:15873]	down
ENSG00000148175	STOM	-0.401851	2.62354e-73	1.13951e-68	0.213	0.364	stomatin [Source:HGNC Symbol;Acc:HGNC:3383]	down
ENSG00000163683	SMIM14	-0.337013	3.09615e-73	1.34478e-68	0.131	0.264	small integral membrane protein 14 [Source:HGNC Symbol;Acc:HGNC:27321]	down
ENSG00000151702	FLI1	-0.366697	3.1912e-73	1.38607e-68	0.132	0.268	Fli-1 proto-oncogene, ETS transcription factor [Source:HGNC Symbol;Acc:HGNC:3749]	down
ENSG00000164904	ALDH7A1	-0.24986	3.58078e-73	1.55528e-68	0.024	0.1	aldehyde dehydrogenase 7 family member A1 [Source:HGNC Symbol;Acc:HGNC:877]	no_diff
ENSG00000170889	RPS9	0.317958	4.13124e-73	1.79436e-68	0.968	0.958	ribosomal protein S9 [Source:HGNC Symbol;Acc:HGNC:10442]	up
ENSG00000146070	PLA2G7	0.402439	5.45218e-73	2.3681e-68	0.142	0.04	phospholipase A2 group VII [Source:HGNC Symbol;Acc:HGNC:9040]	up
ENSG00000228434	AC004951.1	-0.309236	6.54773e-73	2.84394e-68	0.046	0.14	novel transcript	down
ENSG00000127022	CANX	0.362676	6.66126e-73	2.89325e-68	0.704	0.662	calnexin [Source:HGNC Symbol;Acc:HGNC:1473]	up
ENSG00000129559	NEDD8	0.446505	7.23618e-73	3.14296e-68	0.566	0.435	neural precursor cell expressed, developmentally down-regulated 8 [Source:HGNC Symbol;Acc:HGNC:7732]	up
ENSG00000166432	ZMAT1	-0.299033	1.08204e-72	4.69971e-68	0.028	0.108	zinc finger matrin-type 1 [Source:HGNC Symbol;Acc:HGNC:29377]	down
ENSG00000168405	CMAHP	-0.273175	1.17925e-72	5.12196e-68	0.033	0.118	cytidine monophospho-N-acetylneuraminic acid hydroxylase, pseudogene [Source:HGNC Symbol;Acc:HGNC:2098]	down
ENSG00000170802	FOXN2	-0.366436	1.22009e-72	5.29933e-68	0.13	0.263	forkhead box N2 [Source:HGNC Symbol;Acc:HGNC:5281]	down
ENSG00000127507	ADGRE2	0.457344	1.22836e-72	5.33524e-68	0.328	0.175	adhesion G protein-coupled receptor E2 [Source:HGNC Symbol;Acc:HGNC:3337]	up
ENSG00000206573	THUMPD3-AS1	-0.509192	1.77365e-72	7.70369e-68	0.32	0.457	THUMPD3 antisense RNA 1 [Source:HGNC Symbol;Acc:HGNC:44478]	down
ENSG00000241553	ARPC4	0.436529	2.55267e-72	1.10873e-67	0.612	0.486	actin related protein 2/3 complex subunit 4 [Source:HGNC Symbol;Acc:HGNC:707]	up
ENSG00000170323	FABP4	1.4612	3.06919e-72	1.33307e-67	0.125	0.072	fatty acid binding protein 4 [Source:HGNC Symbol;Acc:HGNC:3559]	up
ENSG00000213203	GIMAP1	-0.341092	3.71301e-72	1.61271e-67	0.099	0.223	GTPase, IMAP family member 1 [Source:HGNC Symbol;Acc:HGNC:23237]	down
ENSG00000177697	CD151	0.472871	4.3452e-72	1.8873e-67	0.387	0.238	CD151 molecule (Raph blood group) [Source:HGNC Symbol;Acc:HGNC:1630]	up
ENSG00000113555	PCDH12	-0.211015	5.22175e-72	2.26802e-67	0.01	0.068	protocadherin 12 [Source:HGNC Symbol;Acc:HGNC:8657]	no_diff
ENSG00000162702	ZNF281	0.506524	5.66226e-72	2.45935e-67	0.266	0.137	zinc finger protein 281 [Source:HGNC Symbol;Acc:HGNC:13075]	up
ENSG00000137801	THBS1	0.691149	6.28697e-72	2.73068e-67	0.51	0.491	thrombospondin 1 [Source:HGNC Symbol;Acc:HGNC:11785]	up
ENSG00000128383	APOBEC3A	0.593367	1.05999e-71	4.60397e-67	0.106	0.02	apolipoprotein B mRNA editing enzyme catalytic subunit 3A [Source:HGNC Symbol;Acc:HGNC:17343]	up
ENSG00000196639	HRH1	-0.398485	1.2036e-71	5.22771e-67	0.064	0.16	histamine receptor H1 [Source:HGNC Symbol;Acc:HGNC:5182]	down
ENSG00000082153	BZW1	0.455837	1.22039e-71	5.30064e-67	0.528	0.405	basic leucine zipper and W2 domains 1 [Source:HGNC Symbol;Acc:HGNC:18380]	up
ENSG00000144959	NCEH1	0.454974	1.32771e-71	5.76678e-67	0.281	0.15	neutral cholesterol ester hydrolase 1 [Source:HGNC Symbol;Acc:HGNC:29260]	up
ENSG00000182372	CLN8	-0.434889	1.42606e-71	6.19397e-67	0.201	0.341	CLN8, transmembrane ER and ERGIC protein [Source:HGNC Symbol;Acc:HGNC:2079]	down
ENSG00000129625	REEP5	0.442039	1.51842e-71	6.59512e-67	0.517	0.371	receptor accessory protein 5 [Source:HGNC Symbol;Acc:HGNC:30077]	up
ENSG00000115525	ST3GAL5	-0.341605	1.80374e-71	7.83435e-67	0.065	0.168	ST3 beta-galactoside alpha-2,3-sialyltransferase 5 [Source:HGNC Symbol;Acc:HGNC:10872]	down
ENSG00000177156	TALDO1	0.434395	2.82337e-71	1.2263e-66	0.545	0.436	transaldolase 1 [Source:HGNC Symbol;Acc:HGNC:11559]	up
ENSG00000092199	HNRNPC	0.392233	3.08503e-71	1.33995e-66	0.677	0.585	heterogeneous nuclear ribonucleoprotein C (C1/C2) [Source:HGNC Symbol;Acc:HGNC:5035]	up
ENSG00000058262	SEC61A1	0.444016	4.25358e-71	1.8475e-66	0.32	0.175	Sec61 translocon alpha 1 subunit [Source:HGNC Symbol;Acc:HGNC:18276]	up
ENSG00000153012	LGI2	-0.254638	4.68473e-71	2.03476e-66	0.015	0.077	leucine rich repeat LGI family member 2 [Source:HGNC Symbol;Acc:HGNC:18710]	no_diff
ENSG00000078808	SDF4	0.430751	4.7176e-71	2.04904e-66	0.347	0.199	stromal cell derived factor 4 [Source:HGNC Symbol;Acc:HGNC:24188]	up
ENSG00000196683	TOMM7	-0.393082	4.98393e-71	2.16472e-66	0.522	0.648	translocase of outer mitochondrial membrane 7 [Source:HGNC Symbol;Acc:HGNC:21648]	down
ENSG00000100600	LGMN	-0.51529	5.44747e-71	2.36605e-66	0.34	0.483	legumain [Source:HGNC Symbol;Acc:HGNC:9472]	down
ENSG00000162924	REL	-0.421877	6.82287e-71	2.96345e-66	0.47	0.618	REL proto-oncogene, NF-kB subunit [Source:HGNC Symbol;Acc:HGNC:9954]	down
ENSG00000199990	VTRNA1-1	-0.262538	7.00388e-71	3.04206e-66	0.033	0.116	vault RNA 1-1 [Source:HGNC Symbol;Acc:HGNC:12654]	down
ENSG00000196218	RYR1	-0.201596	7.65468e-71	3.32474e-66	0.007	0.06	ryanodine receptor 1 [Source:HGNC Symbol;Acc:HGNC:10483]	no_diff
ENSG00000146066	HIGD2A	-0.428565	9.15297e-71	3.9755e-66	0.374	0.519	HIG1 hypoxia inducible domain family member 2A [Source:HGNC Symbol;Acc:HGNC:28311]	down
ENSG00000157045	NTAN1	-0.400848	9.27968e-71	4.03054e-66	0.142	0.274	N-terminal asparagine amidase [Source:HGNC Symbol;Acc:HGNC:29909]	down
ENSG00000164733	CTSB	0.336517	9.82668e-71	4.26812e-66	0.954	0.972	cathepsin B [Source:HGNC Symbol;Acc:HGNC:2527]	up
ENSG00000092964	DPYSL2	-0.369664	1.07192e-70	4.65576e-66	0.256	0.415	dihydropyrimidinase like 2 [Source:HGNC Symbol;Acc:HGNC:3014]	down
ENSG00000122877	EGR2	-0.361708	1.13676e-70	4.9374e-66	0.078	0.189	early growth response 2 [Source:HGNC Symbol;Acc:HGNC:3239]	down
ENSG00000175334	BANF1	0.450175	1.19136e-70	5.17457e-66	0.353	0.204	barrier to autointegration factor 1 [Source:HGNC Symbol;Acc:HGNC:17397]	up
ENSG00000230606	AC092683.1	-0.250889	1.31479e-70	5.71068e-66	0.022	0.094	novel transcript	no_diff
ENSG00000198964	SGMS1	-0.393418	1.57756e-70	6.85197e-66	0.156	0.292	sphingomyelin synthase 1 [Source:HGNC Symbol;Acc:HGNC:29799]	down
ENSG00000196352	CD55	0.517065	1.6034e-70	6.96422e-66	0.556	0.448	CD55 molecule (Cromer blood group) [Source:HGNC Symbol;Acc:HGNC:2665]	up
ENSG00000175727	MLXIP	-0.411395	1.6066e-70	6.97811e-66	0.25	0.405	MLX interacting protein [Source:HGNC Symbol;Acc:HGNC:17055]	down
ENSG00000152804	HHEX	-0.364707	2.79673e-70	1.21473e-65	0.112	0.235	hematopoietically expressed homeobox [Source:HGNC Symbol;Acc:HGNC:4901]	down
ENSG00000198938	MT-CO3	-0.00808171	2.93438e-70	1.27452e-65	0.996	0.986	mitochondrially encoded cytochrome c oxidase III [Source:HGNC Symbol;Acc:HGNC:7422]	no_diff
ENSG00000254635	WAC-AS1	-0.318325	3.25175e-70	1.41237e-65	0.084	0.195	WAC antisense RNA 1 (head to head) [Source:HGNC Symbol;Acc:HGNC:27347]	down
ENSG00000136436	CALCOCO2	-0.395351	4.1437e-70	1.79978e-65	0.227	0.373	calcium binding and coiled-coil domain 2 [Source:HGNC Symbol;Acc:HGNC:29912]	down
ENSG00000228058	LINC01736	-0.208525	4.19712e-70	1.82298e-65	0.009	0.066	long intergenic non-protein coding RNA 1736 [Source:HGNC Symbol;Acc:HGNC:52524]	no_diff
ENSG00000204103	MAFB	-0.327475	4.97735e-70	2.16186e-65	0.801	0.896	MAF bZIP transcription factor B [Source:HGNC Symbol;Acc:HGNC:6408]	down
ENSG00000154237	LRRK1	-0.319983	4.99211e-70	2.16827e-65	0.06	0.162	leucine rich repeat kinase 1 [Source:HGNC Symbol;Acc:HGNC:18608]	down
ENSG00000163814	CDCP1	0.414072	5.62005e-70	2.44101e-65	0.168	0.064	CUB domain containing protein 1 [Source:HGNC Symbol;Acc:HGNC:24357]	up
ENSG00000154258	ABCA9	-0.159693	6.61245e-70	2.87205e-65	0.003	0.046	ATP binding cassette subfamily A member 9 [Source:HGNC Symbol;Acc:HGNC:39]	no_diff
ENSG00000085063	CD59	-0.437654	7.81606e-70	3.39483e-65	0.132	0.241	CD59 molecule (CD59 blood group) [Source:HGNC Symbol;Acc:HGNC:1689]	down
ENSG00000248593	DSTNP2	-0.281086	8.27806e-70	3.59549e-65	0.037	0.118	destrin, actin depolymerizing factor pseudogene 2 [Source:HGNC Symbol;Acc:HGNC:34546]	down
ENSG00000103319	EEF2K	-0.328477	8.61408e-70	3.74144e-65	0.052	0.141	eukaryotic elongation factor 2 kinase [Source:HGNC Symbol;Acc:HGNC:24615]	down
ENSG00000166002	SMCO4	0.383737	9.58725e-70	4.16413e-65	0.216	0.09	single-pass membrane protein with coiled-coil domains 4 [Source:HGNC Symbol;Acc:HGNC:24810]	up
ENSG00000241468	ATP5MF	0.427706	9.80313e-70	4.25789e-65	0.542	0.431	ATP synthase membrane subunit f [Source:HGNC Symbol;Acc:HGNC:848]	up
ENSG00000141664	ZCCHC2	-0.367487	9.87674e-70	4.28986e-65	0.177	0.321	zinc finger CCHC-type containing 2 [Source:HGNC Symbol;Acc:HGNC:22916]	down
ENSG00000157657	ZNF618	-0.208261	1.23011e-69	5.34287e-65	0.011	0.071	zinc finger protein 618 [Source:HGNC Symbol;Acc:HGNC:29416]	no_diff
ENSG00000135535	CD164	-0.388529	1.89143e-69	8.21525e-65	0.567	0.701	CD164 molecule [Source:HGNC Symbol;Acc:HGNC:1632]	down
ENSG00000099800	TIMM13	0.457969	2.16589e-69	9.40735e-65	0.357	0.216	translocase of inner mitochondrial membrane 13 [Source:HGNC Symbol;Acc:HGNC:11816]	up
ENSG00000038219	BOD1L1	-0.452946	2.42833e-69	1.05472e-64	0.346	0.497	biorientation of chromosomes in cell division 1 like 1 [Source:HGNC Symbol;Acc:HGNC:31792]	down
ENSG00000137936	BCAR3	-0.160046	2.49452e-69	1.08347e-64	0.005	0.053	BCAR3, NSP family adaptor protein [Source:HGNC Symbol;Acc:HGNC:973]	no_diff
ENSG00000103485	QPRT	-0.19242	2.81355e-69	1.22204e-64	0.008	0.061	quinolinate phosphoribosyltransferase [Source:HGNC Symbol;Acc:HGNC:9755]	no_diff
ENSG00000132170	PPARG	0.377738	4.36158e-69	1.89441e-64	0.216	0.09	peroxisome proliferator activated receptor gamma [Source:HGNC Symbol;Acc:HGNC:9236]	up
ENSG00000076662	ICAM3	0.334797	4.82104e-69	2.09397e-64	0.11	0.022	intercellular adhesion molecule 3 [Source:HGNC Symbol;Acc:HGNC:5346]	up
ENSG00000019991	HGF	-0.25573	5.72344e-69	2.48592e-64	0.035	0.116	hepatocyte growth factor [Source:HGNC Symbol;Acc:HGNC:4893]	no_diff
ENSG00000213585	VDAC1	0.442499	5.82302e-69	2.52917e-64	0.465	0.331	voltage dependent anion channel 1 [Source:HGNC Symbol;Acc:HGNC:12669]	up
ENSG00000203875	SNHG5	-0.403096	7.99973e-69	3.4746e-64	0.417	0.565	small nucleolar RNA host gene 5 [Source:HGNC Symbol;Acc:HGNC:21026]	down
ENSG00000137880	GCHFR	0.399102	8.38306e-69	3.6411e-64	0.133	0.039	GTP cyclohydrolase I feedback regulator [Source:HGNC Symbol;Acc:HGNC:4194]	up
ENSG00000150977	RILPL2	0.479934	8.7334e-69	3.79326e-64	0.534	0.393	Rab interacting lysosomal protein like 2 [Source:HGNC Symbol;Acc:HGNC:28787]	up
ENSG00000149428	HYOU1	0.449688	8.77654e-69	3.812e-64	0.24	0.114	hypoxia up-regulated 1 [Source:HGNC Symbol;Acc:HGNC:16931]	up
ENSG00000064933	PMS1	-0.275834	9.36923e-69	4.06943e-64	0.035	0.118	PMS1 homolog 1, mismatch repair system component [Source:HGNC Symbol;Acc:HGNC:9121]	down
ENSG00000178425	NT5DC1	-0.270219	9.69808e-69	4.21226e-64	0.031	0.11	5'-nucleotidase domain containing 1 [Source:HGNC Symbol;Acc:HGNC:21556]	down
ENSG00000260077	AC104794.2	-0.215564	1.11642e-68	4.84907e-64	0.018	0.085	novel transcript	no_diff
ENSG00000117362	APH1A	-0.404237	1.44491e-68	6.27583e-64	0.226	0.37	aph-1 homolog A, gamma-secretase subunit [Source:HGNC Symbol;Acc:HGNC:29509]	down
ENSG00000130208	APOC1	-0.500634	1.59375e-68	6.92228e-64	0.164	0.301	apolipoprotein C1 [Source:HGNC Symbol;Acc:HGNC:607]	down
ENSG00000168268	NT5DC2	0.387431	3.16967e-68	1.37671e-63	0.177	0.065	5'-nucleotidase domain containing 2 [Source:HGNC Symbol;Acc:HGNC:25717]	up
ENSG00000164221	CCDC112	-0.390249	3.47289e-68	1.50841e-63	0.125	0.248	coiled-coil domain containing 112 [Source:HGNC Symbol;Acc:HGNC:28599]	down
ENSG00000197256	KANK2	-0.264974	4.00651e-68	1.74019e-63	0.029	0.104	KN motif and ankyrin repeat domains 2 [Source:HGNC Symbol;Acc:HGNC:29300]	down
ENSG00000164442	CITED2	-0.459901	4.96863e-68	2.15807e-63	0.282	0.429	Cbp/p300 interacting transactivator with Glu/Asp rich carboxy-terminal domain 2 [Source:HGNC Symbol;Acc:HGNC:1987]	down
ENSG00000180773	SLC36A4	0.433162	5.65643e-68	2.45682e-63	0.249	0.122	solute carrier family 36 member 4 [Source:HGNC Symbol;Acc:HGNC:19660]	up
ENSG00000140332	TLE3	0.472608	6.32835e-68	2.74866e-63	0.318	0.184	TLE family member 3, transcriptional corepressor [Source:HGNC Symbol;Acc:HGNC:11839]	up
ENSG00000113732	ATP6V0E1	0.390085	1.5468e-67	6.71837e-63	0.702	0.611	ATPase H+ transporting V0 subunit e1 [Source:HGNC Symbol;Acc:HGNC:863]	up
ENSG00000175066	GK5	0.396219	1.81319e-67	7.87541e-63	0.143	0.044	glycerol kinase 5 [Source:HGNC Symbol;Acc:HGNC:28635]	up
ENSG00000117707	PROX1	-0.186701	1.85075e-67	8.03853e-63	0.004	0.049	prospero homeobox 1 [Source:HGNC Symbol;Acc:HGNC:9459]	no_diff
ENSG00000174444	RPL4	-0.350387	4.2509e-67	1.84634e-62	0.725	0.804	ribosomal protein L4 [Source:HGNC Symbol;Acc:HGNC:10353]	down
ENSG00000129562	DAD1	0.438234	4.57049e-67	1.98515e-62	0.433	0.286	defender against cell death 1 [Source:HGNC Symbol;Acc:HGNC:2664]	up
ENSG00000118418	HMGN3	-0.334385	6.31228e-67	2.74167e-62	0.166	0.301	high mobility group nucleosomal binding domain 3 [Source:HGNC Symbol;Acc:HGNC:12312]	down
ENSG00000198931	APRT	0.427051	7.95428e-67	3.45486e-62	0.532	0.424	adenine phosphoribosyltransferase [Source:HGNC Symbol;Acc:HGNC:626]	up
ENSG00000108821	COL1A1	0.483261	8.37459e-67	3.63742e-62	0.11	0.034	collagen type I alpha 1 chain [Source:HGNC Symbol;Acc:HGNC:2197]	up
ENSG00000213316	LTC4S	-0.307318	8.65411e-67	3.75882e-62	0.054	0.148	leukotriene C4 synthase [Source:HGNC Symbol;Acc:HGNC:6719]	down
ENSG00000257181	AC025423.4	-0.172686	9.04612e-67	3.92909e-62	0.007	0.057	novel transcript	no_diff
ENSG00000171055	FEZ2	-0.405532	1.53581e-66	6.67065e-62	0.193	0.33	fasciculation and elongation protein zeta 2 [Source:HGNC Symbol;Acc:HGNC:3660]	down
ENSG00000073060	SCARB1	-0.298065	1.5546e-66	6.75225e-62	0.043	0.127	scavenger receptor class B member 1 [Source:HGNC Symbol;Acc:HGNC:1664]	down
ENSG00000159216	RUNX1	0.463562	1.82169e-66	7.91235e-62	0.506	0.357	runt related transcription factor 1 [Source:HGNC Symbol;Acc:HGNC:10471]	up
ENSG00000124299	PEPD	-0.430148	2.56175e-66	1.11267e-61	0.191	0.317	peptidase D [Source:HGNC Symbol;Acc:HGNC:8840]	down
ENSG00000096968	JAK2	-0.317272	2.8785e-66	1.25025e-61	0.093	0.206	Janus kinase 2 [Source:HGNC Symbol;Acc:HGNC:6192]	down
ENSG00000160410	SHKBP1	0.430979	3.3575e-66	1.4583e-61	0.31	0.171	SH3KBP1 binding protein 1 [Source:HGNC Symbol;Acc:HGNC:19214]	up
ENSG00000137193	PIM1	0.432813	3.46068e-66	1.50311e-61	0.173	0.067	Pim-1 proto-oncogene, serine/threonine kinase [Source:HGNC Symbol;Acc:HGNC:8986]	up
ENSG00000197756	RPL37A	-0.30653	3.93226e-66	1.70794e-61	0.93	0.954	ribosomal protein L37a [Source:HGNC Symbol;Acc:HGNC:10348]	down
ENSG00000196664	TLR7	-0.234208	4.12389e-66	1.79117e-61	0.032	0.111	toll like receptor 7 [Source:HGNC Symbol;Acc:HGNC:15631]	no_diff
ENSG00000119899	SLC17A5	-0.336207	5.10382e-66	2.21679e-61	0.099	0.214	solute carrier family 17 member 5 [Source:HGNC Symbol;Acc:HGNC:10933]	down
ENSG00000090013	BLVRB	-0.334678	5.13927e-66	2.23219e-61	0.654	0.801	biliverdin reductase B [Source:HGNC Symbol;Acc:HGNC:1063]	down
ENSG00000140105	WARS	0.398175	5.32675e-66	2.31362e-61	0.203	0.084	tryptophanyl-tRNA synthetase [Source:HGNC Symbol;Acc:HGNC:12729]	up
ENSG00000251034	AC037459.2	-0.163788	6.45951e-66	2.80563e-61	0.004	0.047	novel transcript	no_diff
ENSG00000110880	CORO1C	0.443189	9.11245e-66	3.9579e-61	0.401	0.257	coronin 1C [Source:HGNC Symbol;Acc:HGNC:2254]	up
ENSG00000106263	EIF3B	0.430808	1.11593e-65	4.84692e-61	0.316	0.178	eukaryotic translation initiation factor 3 subunit B [Source:HGNC Symbol;Acc:HGNC:3280]	up
ENSG00000143106	PSMA5	0.408055	1.29156e-65	5.60978e-61	0.303	0.166	proteasome subunit alpha 5 [Source:HGNC Symbol;Acc:HGNC:9534]	up
ENSG00000137509	PRCP	-0.326119	1.32741e-65	5.76549e-61	0.154	0.286	prolylcarboxypeptidase [Source:HGNC Symbol;Acc:HGNC:9344]	down
ENSG00000008018	PSMB1	0.423798	1.33168e-65	5.78402e-61	0.505	0.367	proteasome subunit beta 1 [Source:HGNC Symbol;Acc:HGNC:9537]	up
ENSG00000180357	ZNF609	-0.306763	2.61328e-65	1.13505e-60	0.083	0.19	zinc finger protein 609 [Source:HGNC Symbol;Acc:HGNC:29003]	down
ENSG00000225889	AC012368.1	-0.196332	2.71889e-65	1.18092e-60	0.015	0.075	novel transcript, antisense to PELI1	no_diff
ENSG00000171049	FPR2	0.369803	2.81356e-65	1.22204e-60	0.124	0.032	formyl peptide receptor 2 [Source:HGNC Symbol;Acc:HGNC:3827]	up
ENSG00000144668	ITGA9	-0.209421	3.13849e-65	1.36317e-60	0.012	0.069	integrin subunit alpha 9 [Source:HGNC Symbol;Acc:HGNC:6145]	no_diff
ENSG00000137462	TLR2	0.434919	3.619e-65	1.57188e-60	0.453	0.362	toll like receptor 2 [Source:HGNC Symbol;Acc:HGNC:11848]	up
ENSG00000130748	TMEM160	0.426666	3.98674e-65	1.7316e-60	0.294	0.162	transmembrane protein 160 [Source:HGNC Symbol;Acc:HGNC:26042]	up
ENSG00000198223	CSF2RA	-0.36383	6.05166e-65	2.62848e-60	0.158	0.294	colony stimulating factor 2 receptor alpha subunit [Source:HGNC Symbol;Acc:HGNC:2435]	down
ENSG00000106034	CPED1	-0.236129	7.11052e-65	3.08838e-60	0.031	0.105	cadherin like and PC-esterase domain containing 1 [Source:HGNC Symbol;Acc:HGNC:26159]	no_diff
ENSG00000185651	UBE2L3	0.426134	7.50401e-65	3.25929e-60	0.421	0.281	ubiquitin conjugating enzyme E2 L3 [Source:HGNC Symbol;Acc:HGNC:12488]	up
ENSG00000108798	ABI3	-0.254076	7.72457e-65	3.35509e-60	0.058	0.153	ABI family member 3 [Source:HGNC Symbol;Acc:HGNC:29859]	no_diff
ENSG00000067057	PFKP	0.299222	7.72544e-65	3.35547e-60	0.121	0.031	phosphofructokinase, platelet [Source:HGNC Symbol;Acc:HGNC:8878]	up
ENSG00000071054	MAP4K4	0.46117	1.0478e-64	4.55102e-60	0.361	0.236	mitogen-activated protein kinase kinase kinase kinase 4 [Source:HGNC Symbol;Acc:HGNC:6866]	up
ENSG00000166833	NAV2	-0.187218	1.1144e-64	4.84029e-60	0.005	0.051	neuron navigator 2 [Source:HGNC Symbol;Acc:HGNC:15997]	no_diff
ENSG00000188994	ZNF292	-0.335228	1.11918e-64	4.86106e-60	0.156	0.287	zinc finger protein 292 [Source:HGNC Symbol;Acc:HGNC:18410]	down
ENSG00000175061	SNHG29	-0.398132	1.29954e-64	5.64441e-60	0.492	0.624	small nucleolar RNA host gene 29 [Source:HGNC Symbol;Acc:HGNC:28619]	down
ENSG00000242485	MRPL20	0.435647	1.53796e-64	6.68e-60	0.434	0.302	mitochondrial ribosomal protein L20 [Source:HGNC Symbol;Acc:HGNC:14478]	up
ENSG00000165424	ZCCHC24	-0.272033	1.61766e-64	7.02616e-60	0.03	0.107	zinc finger CCHC-type containing 24 [Source:HGNC Symbol;Acc:HGNC:26911]	down
ENSG00000165175	MID1IP1	-0.417948	2.26416e-64	9.83416e-60	0.144	0.264	MID1 interacting protein 1 [Source:HGNC Symbol;Acc:HGNC:20715]	down
ENSG00000095015	MAP3K1	-0.332976	3.05897e-64	1.32863e-59	0.178	0.316	mitogen-activated protein kinase kinase kinase 1 [Source:HGNC Symbol;Acc:HGNC:6848]	down
ENSG00000185946	RNPC3	-0.343822	3.39125e-64	1.47295e-59	0.082	0.189	RNA binding region (RNP1, RRM) containing 3 [Source:HGNC Symbol;Acc:HGNC:18666]	down
ENSG00000170271	FAXDC2	-0.152763	3.65308e-64	1.58668e-59	0.006	0.053	fatty acid hydroxylase domain containing 2 [Source:HGNC Symbol;Acc:HGNC:1334]	no_diff
ENSG00000115963	RND3	-0.362102	3.91291e-64	1.69954e-59	0.034	0.114	Rho family GTPase 3 [Source:HGNC Symbol;Acc:HGNC:671]	down
ENSG00000141232	TOB1	-0.395122	5.06062e-64	2.19803e-59	0.219	0.361	transducer of ERBB2, 1 [Source:HGNC Symbol;Acc:HGNC:11979]	down
ENSG00000170153	RNF150	-0.16109	5.948e-64	2.58346e-59	0.002	0.037	ring finger protein 150 [Source:HGNC Symbol;Acc:HGNC:23138]	no_diff
ENSG00000134186	PRPF38B	-0.422358	6.93302e-64	3.01129e-59	0.389	0.53	pre-mRNA processing factor 38B [Source:HGNC Symbol;Acc:HGNC:25512]	down
ENSG00000144218	AFF3	-0.140962	7.43378e-64	3.22879e-59	0.002	0.041	AF4/FMR2 family member 3 [Source:HGNC Symbol;Acc:HGNC:6473]	no_diff
ENSG00000228253	MT-ATP8	0.47203	7.63845e-64	3.31768e-59	0.431	0.313	mitochondrially encoded ATP synthase membrane subunit 8 [Source:HGNC Symbol;Acc:HGNC:7415]	up
ENSG00000162723	SLAMF9	0.218214	1.08563e-63	4.71535e-59	0.067	0.005	SLAM family member 9 [Source:HGNC Symbol;Acc:HGNC:18430]	no_diff
ENSG00000138764	CCNG2	-0.264108	1.10616e-63	4.80448e-59	0.053	0.144	cyclin G2 [Source:HGNC Symbol;Acc:HGNC:1593]	down
ENSG00000131669	NINJ1	-0.435767	1.43517e-63	6.23353e-59	0.416	0.538	ninjurin 1 [Source:HGNC Symbol;Acc:HGNC:7824]	down
ENSG00000158710	TAGLN2	0.371386	1.46659e-63	6.37e-59	0.764	0.679	transgelin 2 [Source:HGNC Symbol;Acc:HGNC:11554]	up
ENSG00000196865	NHLRC2	-0.250037	1.65333e-63	7.18106e-59	0.034	0.112	NHL repeat containing 2 [Source:HGNC Symbol;Acc:HGNC:24731]	no_diff
ENSG00000111275	ALDH2	-0.283917	1.71783e-63	7.46124e-59	0.23	0.367	aldehyde dehydrogenase 2 family member [Source:HGNC Symbol;Acc:HGNC:404]	down
ENSG00000090857	PDPR	-0.279669	2.16901e-63	9.42089e-59	0.053	0.141	pyruvate dehydrogenase phosphatase regulatory subunit [Source:HGNC Symbol;Acc:HGNC:30264]	down
ENSG00000167085	PHB	0.411869	3.41035e-63	1.48125e-58	0.294	0.161	prohibitin [Source:HGNC Symbol;Acc:HGNC:8912]	up
ENSG00000266402	SNHG25	-0.312619	4.63503e-63	2.01318e-58	0.098	0.207	small nucleolar RNA host gene 25 [Source:HGNC Symbol;Acc:HGNC:51534]	down
ENSG00000076108	BAZ2A	-0.382185	7.10152e-63	3.08447e-58	0.184	0.318	bromodomain adjacent to zinc finger domain 2A [Source:HGNC Symbol;Acc:HGNC:962]	down
ENSG00000196405	EVL	-0.307982	7.18942e-63	3.12265e-58	0.072	0.173	Enah/Vasp-like [Source:HGNC Symbol;Acc:HGNC:20234]	down
ENSG00000125691	RPL23	-0.308992	8.05202e-63	3.49731e-58	0.907	0.93	ribosomal protein L23 [Source:HGNC Symbol;Acc:HGNC:10316]	down
ENSG00000183549	ACSM5	-0.12089	1.41526e-62	6.14705e-58	0.001	0.032	acyl-CoA synthetase medium chain family member 5 [Source:HGNC Symbol;Acc:HGNC:26060]	no_diff
ENSG00000112137	PHACTR1	0.496194	1.60238e-62	6.95978e-58	0.512	0.374	phosphatase and actin regulator 1 [Source:HGNC Symbol;Acc:HGNC:20990]	up
ENSG00000123505	AMD1	-0.413439	1.81926e-62	7.90179e-58	0.351	0.493	adenosylmethionine decarboxylase 1 [Source:HGNC Symbol;Acc:HGNC:457]	down
ENSG00000145864	GABRB2	-0.142861	1.8287e-62	7.94276e-58	0	0.03	gamma-aminobutyric acid type A receptor beta2 subunit [Source:HGNC Symbol;Acc:HGNC:4082]	no_diff
ENSG00000171943	SRGAP2C	-0.3365	2.05965e-62	8.94588e-58	0.096	0.207	SLIT-ROBO Rho GTPase activating protein 2C [Source:HGNC Symbol;Acc:HGNC:30584]	down
ENSG00000138071	ACTR2	0.330659	2.12265e-62	9.21953e-58	0.832	0.778	ARP2 actin related protein 2 homolog [Source:HGNC Symbol;Acc:HGNC:169]	up
ENSG00000145824	CXCL14	-0.231991	2.77083e-62	1.20348e-57	0.016	0.077	C-X-C motif chemokine ligand 14 [Source:HGNC Symbol;Acc:HGNC:10640]	no_diff
ENSG00000167280	ENGASE	-0.309258	2.91292e-62	1.2652e-57	0.045	0.129	endo-beta-N-acetylglucosaminidase [Source:HGNC Symbol;Acc:HGNC:24622]	down
ENSG00000110092	CCND1	-0.277504	3.21142e-62	1.39485e-57	0.02	0.081	cyclin D1 [Source:HGNC Symbol;Acc:HGNC:1582]	no_diff
ENSG00000184384	MAML2	0.454036	3.40585e-62	1.4793e-57	0.313	0.196	mastermind like transcriptional coactivator 2 [Source:HGNC Symbol;Acc:HGNC:16259]	up
ENSG00000266378	AC005224.3	0.430832	5.01394e-62	2.17775e-57	0.092	0.018	novel transcript	no_diff
ENSG00000197629	MPEG1	-0.381955	5.58893e-62	2.4275e-57	0.455	0.604	macrophage expressed 1 [Source:HGNC Symbol;Acc:HGNC:29619]	down
ENSG00000029559	IBSP	0.600676	8.95317e-62	3.88872e-57	0.048	0	integrin binding sialoprotein [Source:HGNC Symbol;Acc:HGNC:5341]	no_diff
ENSG00000171219	CDC42BPG	0.243745	9.52484e-62	4.13702e-57	0.077	0.01	CDC42 binding protein kinase gamma [Source:HGNC Symbol;Acc:HGNC:29829]	no_diff
ENSG00000023697	DERA	-0.337541	1.014e-61	4.4042e-57	0.091	0.195	deoxyribose-phosphate aldolase [Source:HGNC Symbol;Acc:HGNC:24269]	down
ENSG00000178199	ZC3H12D	-0.247606	1.14452e-61	4.97109e-57	0.03	0.103	zinc finger CCCH-type containing 12D [Source:HGNC Symbol;Acc:HGNC:21175]	no_diff
ENSG00000153395	LPCAT1	0.445444	1.43337e-61	6.22572e-57	0.245	0.143	lysophosphatidylcholine acyltransferase 1 [Source:HGNC Symbol;Acc:HGNC:25718]	up
ENSG00000181826	RELL1	-0.282067	1.77236e-61	7.69805e-57	0.058	0.151	RELT like 1 [Source:HGNC Symbol;Acc:HGNC:27379]	down
ENSG00000196878	LAMB3	0.254499	2.08832e-61	9.07039e-57	0.071	0.008	laminin subunit beta 3 [Source:HGNC Symbol;Acc:HGNC:6490]	no_diff
ENSG00000154803	FLCN	-0.356021	2.33417e-61	1.01382e-56	0.089	0.194	folliculin [Source:HGNC Symbol;Acc:HGNC:27310]	down
ENSG00000087086	FTL	-0.00315608	2.67596e-61	1.16228e-56	1	1	ferritin light chain [Source:HGNC Symbol;Acc:HGNC:3999]	no_diff
ENSG00000063245	EPN1	-0.373122	2.68295e-61	1.16531e-56	0.256	0.395	epsin 1 [Source:HGNC Symbol;Acc:HGNC:21604]	down
ENSG00000119397	CNTRL	-0.355398	2.7597e-61	1.19865e-56	0.179	0.314	centriolin [Source:HGNC Symbol;Acc:HGNC:1858]	down
ENSG00000219481	NBPF1	-0.308024	2.78682e-61	1.21043e-56	0.061	0.154	NBPF member 1 [Source:HGNC Symbol;Acc:HGNC:26088]	down
ENSG00000172071	EIF2AK3	0.40159	3.78161e-61	1.64251e-56	0.209	0.098	eukaryotic translation initiation factor 2 alpha kinase 3 [Source:HGNC Symbol;Acc:HGNC:3255]	up
ENSG00000156711	MAPK13	0.297836	4.17551e-61	1.81359e-56	0.164	0.059	mitogen-activated protein kinase 13 [Source:HGNC Symbol;Acc:HGNC:6875]	up
ENSG00000141505	ASGR1	0.397293	4.27264e-61	1.85578e-56	0.203	0.095	asialoglycoprotein receptor 1 [Source:HGNC Symbol;Acc:HGNC:742]	up
ENSG00000251442	LINC01094	0.379857	4.8775e-61	2.11849e-56	0.149	0.055	long intergenic non-protein coding RNA 1094 [Source:HGNC Symbol;Acc:HGNC:49219]	up
ENSG00000043143	JADE2	-0.257657	4.95918e-61	2.15397e-56	0.038	0.119	jade family PHD finger 2 [Source:HGNC Symbol;Acc:HGNC:22984]	no_diff
ENSG00000188783	PRELP	-0.282793	5.1909e-61	2.25462e-56	0.037	0.108	proline and arginine rich end leucine rich repeat protein [Source:HGNC Symbol;Acc:HGNC:9357]	down
ENSG00000168461	RAB31	-0.388081	7.05709e-61	3.06518e-56	0.556	0.683	RAB31, member RAS oncogene family [Source:HGNC Symbol;Acc:HGNC:9771]	down
ENSG00000119900	OGFRL1	-0.429135	9.3248e-61	4.05014e-56	0.356	0.493	opioid growth factor receptor like 1 [Source:HGNC Symbol;Acc:HGNC:21378]	down
ENSG00000221823	PPP3R1	-0.395401	1.01471e-60	4.40731e-56	0.191	0.325	protein phosphatase 3 regulatory subunit B, alpha [Source:HGNC Symbol;Acc:HGNC:9317]	down
ENSG00000150347	ARID5B	0.525745	1.14082e-60	4.95504e-56	0.289	0.18	AT-rich interaction domain 5B [Source:HGNC Symbol;Acc:HGNC:17362]	up
ENSG00000198909	MAP3K3	-0.329373	1.28785e-60	5.59365e-56	0.157	0.285	mitogen-activated protein kinase kinase kinase 3 [Source:HGNC Symbol;Acc:HGNC:6855]	down
ENSG00000175538	KCNE3	-0.30859	1.71679e-60	7.45671e-56	0.108	0.22	potassium voltage-gated channel subfamily E regulatory subunit 3 [Source:HGNC Symbol;Acc:HGNC:6243]	down
ENSG00000214900	LINC01588	0.255325	1.76263e-60	7.65581e-56	0.086	0.015	long intergenic non-protein coding RNA 1588 [Source:HGNC Symbol;Acc:HGNC:27503]	no_diff
ENSG00000175390	EIF3F	-0.389798	2.05926e-60	8.94421e-56	0.371	0.502	eukaryotic translation initiation factor 3 subunit F [Source:HGNC Symbol;Acc:HGNC:3275]	down
ENSG00000174282	ZBTB4	-0.313267	2.12458e-60	9.22788e-56	0.088	0.192	zinc finger and BTB domain containing 4 [Source:HGNC Symbol;Acc:HGNC:23847]	down
ENSG00000114857	NKTR	-0.387273	2.1983e-60	9.54809e-56	0.237	0.378	natural killer cell triggering receptor [Source:HGNC Symbol;Acc:HGNC:7833]	down
ENSG00000161921	CXCL16	0.437569	2.74067e-60	1.19038e-55	0.469	0.367	C-X-C motif chemokine ligand 16 [Source:HGNC Symbol;Acc:HGNC:16642]	up
ENSG00000107104	KANK1	0.24885	3.174e-60	1.37859e-55	0.083	0.013	KN motif and ankyrin repeat domains 1 [Source:HGNC Symbol;Acc:HGNC:19309]	no_diff
ENSG00000172590	MRPL52	0.416347	3.27435e-60	1.42218e-55	0.337	0.21	mitochondrial ribosomal protein L52 [Source:HGNC Symbol;Acc:HGNC:16655]	up
ENSG00000239911	PRKAG2-AS1	0.397849	3.77933e-60	1.64152e-55	0.207	0.1	PRKAG2 antisense RNA 1 [Source:HGNC Symbol;Acc:HGNC:40468]	up
ENSG00000104979	C19orf53	0.401186	4.05798e-60	1.76254e-55	0.51	0.394	chromosome 19 open reading frame 53 [Source:HGNC Symbol;Acc:HGNC:24991]	up
ENSG00000143774	GUK1	0.386396	4.12359e-60	1.79104e-55	0.632	0.518	guanylate kinase 1 [Source:HGNC Symbol;Acc:HGNC:4693]	up
ENSG00000150593	PDCD4	-0.364246	4.4716e-60	1.94219e-55	0.208	0.346	programmed cell death 4 [Source:HGNC Symbol;Acc:HGNC:8763]	down
ENSG00000069849	ATP1B3	0.37763	5.03771e-60	2.18808e-55	0.72	0.593	ATPase Na+/K+ transporting subunit beta 3 [Source:HGNC Symbol;Acc:HGNC:806]	up
ENSG00000089177	KIF16B	-0.277712	5.65535e-60	2.45634e-55	0.043	0.126	kinesin family member 16B [Source:HGNC Symbol;Acc:HGNC:15869]	down
ENSG00000127922	SEM1	0.411298	6.31908e-60	2.74463e-55	0.452	0.329	SEM1, 26S proteasome complex subunit [Source:HGNC Symbol;Acc:HGNC:10845]	up
ENSG00000007080	CCDC124	0.358781	6.35423e-60	2.7599e-55	0.226	0.107	coiled-coil domain containing 124 [Source:HGNC Symbol;Acc:HGNC:25171]	up
ENSG00000087903	RFX2	0.289058	6.71605e-60	2.91705e-55	0.112	0.028	regulatory factor X2 [Source:HGNC Symbol;Acc:HGNC:9983]	up
ENSG00000018189	RUFY3	-0.350204	7.76673e-60	3.3734e-55	0.105	0.214	RUN and FYVE domain containing 3 [Source:HGNC Symbol;Acc:HGNC:30285]	down
ENSG00000181126	HLA-V	-0.172799	7.78113e-60	3.37966e-55	0.012	0.064	major histocompatibility complex, class I, V (pseudogene) [Source:HGNC Symbol;Acc:HGNC:23482]	no_diff
ENSG00000138758	SEPT11	-0.39385	9.11771e-60	3.96019e-55	0.12	0.223	septin 11 [Source:HGNC Symbol;Acc:HGNC:25589]	down
ENSG00000161381	PLXDC1	-0.142493	9.40951e-60	4.08693e-55	0.002	0.038	plexin domain containing 1 [Source:HGNC Symbol;Acc:HGNC:20945]	no_diff
ENSG00000198804	MT-CO1	-0.0222855	1.00599e-59	4.36941e-55	0.997	0.985	mitochondrially encoded cytochrome c oxidase I [Source:HGNC Symbol;Acc:HGNC:7419]	no_diff
ENSG00000129116	PALLD	-0.263414	1.01598e-59	4.4128e-55	0.064	0.155	palladin, cytoskeletal associated protein [Source:HGNC Symbol;Acc:HGNC:17068]	down
ENSG00000180964	TCEAL8	-0.347735	1.1818e-59	5.13301e-55	0.116	0.228	transcription elongation factor A like 8 [Source:HGNC Symbol;Acc:HGNC:28683]	down
ENSG00000234741	GAS5	-0.39133	1.22645e-59	5.32697e-55	0.337	0.471	growth arrest specific 5 [Source:HGNC Symbol;Acc:HGNC:16355]	down
ENSG00000179388	EGR3	-0.35809	1.66557e-59	7.23423e-55	0.091	0.197	early growth response 3 [Source:HGNC Symbol;Acc:HGNC:3240]	down
ENSG00000152760	TCTEX1D1	0.213899	1.67934e-59	7.29404e-55	0.085	0.014	Tctex1 domain containing 1 [Source:HGNC Symbol;Acc:HGNC:26882]	no_diff
ENSG00000130921	C12orf65	-0.300058	1.70562e-59	7.40821e-55	0.056	0.143	chromosome 12 open reading frame 65 [Source:HGNC Symbol;Acc:HGNC:26784]	down
ENSG00000167088	SNRPD1	0.405248	1.87428e-59	8.14073e-55	0.323	0.197	small nuclear ribonucleoprotein D1 polypeptide [Source:HGNC Symbol;Acc:HGNC:11158]	up
ENSG00000170915	PAQR8	-0.177494	1.91079e-59	8.29933e-55	0.012	0.067	progestin and adipoQ receptor family member 8 [Source:HGNC Symbol;Acc:HGNC:15708]	no_diff
ENSG00000145050	MANF	0.418324	2.00948e-59	8.72799e-55	0.303	0.167	mesencephalic astrocyte derived neurotrophic factor [Source:HGNC Symbol;Acc:HGNC:15461]	up
ENSG00000245904	AC025164.1	0.444091	2.31104e-59	1.00378e-54	0.204	0.106	novel transcript, antisense to BTG1	up
ENSG00000266094	RASSF5	0.435794	2.89417e-59	1.25705e-54	0.244	0.13	Ras association domain family member 5 [Source:HGNC Symbol;Acc:HGNC:17609]	up
ENSG00000175792	RUVBL1	0.267459	3.03369e-59	1.31765e-54	0.125	0.036	RuvB like AAA ATPase 1 [Source:HGNC Symbol;Acc:HGNC:10474]	up
ENSG00000204628	RACK1	-0.288783	4.10351e-59	1.78232e-54	0.905	0.93	receptor for activated C kinase 1 [Source:HGNC Symbol;Acc:HGNC:4399]	down
ENSG00000090266	NDUFB2	0.376376	4.2698e-59	1.85454e-54	0.577	0.493	NADH:ubiquinone oxidoreductase subunit B2 [Source:HGNC Symbol;Acc:HGNC:7697]	up
ENSG00000089280	FUS	-0.372302	4.8385e-59	2.10156e-54	0.612	0.692	FUS RNA binding protein [Source:HGNC Symbol;Acc:HGNC:4010]	down
ENSG00000164830	OXR1	-0.292477	5.26875e-59	2.28843e-54	0.103	0.21	oxidation resistance 1 [Source:HGNC Symbol;Acc:HGNC:15822]	down
ENSG00000181409	AATK	0.237887	5.74914e-59	2.49708e-54	0.082	0.013	apoptosis associated tyrosine kinase [Source:HGNC Symbol;Acc:HGNC:21]	no_diff
ENSG00000013364	MVP	0.39719	6.04325e-59	2.62483e-54	0.276	0.155	major vault protein [Source:HGNC Symbol;Acc:HGNC:7531]	up
ENSG00000143702	CEP170	0.419631	7.07258e-59	3.0719e-54	0.384	0.269	centrosomal protein 170 [Source:HGNC Symbol;Acc:HGNC:28920]	up
ENSG00000165959	CLMN	0.318448	7.92437e-59	3.44187e-54	0.13	0.039	calmin [Source:HGNC Symbol;Acc:HGNC:19972]	up
ENSG00000155846	PPARGC1B	-0.192303	8.26889e-59	3.59151e-54	0.023	0.089	PPARG coactivator 1 beta [Source:HGNC Symbol;Acc:HGNC:30022]	no_diff
ENSG00000161016	RPL8	0.2257	9.26542e-59	4.02434e-54	0.961	0.961	ribosomal protein L8 [Source:HGNC Symbol;Acc:HGNC:10368]	no_diff
ENSG00000142303	ADAMTS10	-0.121573	1.35627e-58	5.89084e-54	0.004	0.04	ADAM metallopeptidase with thrombospondin type 1 motif 10 [Source:HGNC Symbol;Acc:HGNC:13201]	no_diff
ENSG00000143149	ALDH9A1	-0.348381	1.41599e-58	6.15021e-54	0.123	0.235	aldehyde dehydrogenase 9 family member A1 [Source:HGNC Symbol;Acc:HGNC:412]	down
ENSG00000087510	TFAP2C	-0.121861	1.4244e-58	6.18674e-54	0.001	0.03	transcription factor AP-2 gamma [Source:HGNC Symbol;Acc:HGNC:11744]	no_diff
ENSG00000156515	HK1	0.401884	1.4678e-58	6.37525e-54	0.325	0.195	hexokinase 1 [Source:HGNC Symbol;Acc:HGNC:4922]	up
ENSG00000128872	TMOD2	-0.220439	1.58678e-58	6.89203e-54	0.022	0.085	tropomodulin 2 [Source:HGNC Symbol;Acc:HGNC:11872]	no_diff
ENSG00000135077	HAVCR2	0.420956	1.83e-58	7.9484e-54	0.419	0.3	hepatitis A virus cellular receptor 2 [Source:HGNC Symbol;Acc:HGNC:18437]	up
ENSG00000114812	VIPR1	-0.151057	1.89621e-58	8.236e-54	0.007	0.053	vasoactive intestinal peptide receptor 1 [Source:HGNC Symbol;Acc:HGNC:12694]	no_diff
ENSG00000198840	MT-ND3	0.0727443	2.95821e-58	1.28487e-53	0.995	0.981	mitochondrially encoded NADH:ubiquinone oxidoreductase core subunit 3 [Source:HGNC Symbol;Acc:HGNC:7458]	no_diff
ENSG00000117697	NSL1	-0.316151	3.42647e-58	1.48825e-53	0.131	0.246	NSL1, MIS12 kinetochore complex component [Source:HGNC Symbol;Acc:HGNC:24548]	down
ENSG00000134755	DSC2	-0.240741	6.55676e-58	2.84786e-53	0.107	0.211	desmocollin 2 [Source:HGNC Symbol;Acc:HGNC:3036]	no_diff
ENSG00000160256	FAM207A	0.298893	6.91537e-58	3.00362e-53	0.145	0.051	family with sequence similarity 207 member A [Source:HGNC Symbol;Acc:HGNC:15811]	up
ENSG00000177830	CHID1	-0.349479	8.07266e-58	3.50628e-53	0.112	0.217	chitinase domain containing 1 [Source:HGNC Symbol;Acc:HGNC:28474]	down
ENSG00000196220	SRGAP3	-0.189614	8.48459e-58	3.6852e-53	0.012	0.065	SLIT-ROBO Rho GTPase activating protein 3 [Source:HGNC Symbol;Acc:HGNC:19744]	no_diff
ENSG00000162869	PPP1R21	-0.276274	9.65448e-58	4.19333e-53	0.065	0.159	protein phosphatase 1 regulatory subunit 21 [Source:HGNC Symbol;Acc:HGNC:30595]	down
ENSG00000059728	MXD1	0.475856	1.34374e-57	5.8364e-53	0.453	0.341	MAX dimerization protein 1 [Source:HGNC Symbol;Acc:HGNC:6761]	up
ENSG00000166797	CIAO2A	-0.34373	1.35668e-57	5.89261e-53	0.179	0.304	cytosolic iron-sulfur assembly component 2A [Source:HGNC Symbol;Acc:HGNC:26235]	down
ENSG00000119335	SET	0.343723	1.39873e-57	6.07524e-53	0.6	0.539	SET nuclear proto-oncogene [Source:HGNC Symbol;Acc:HGNC:10760]	up
ENSG00000187051	RPS19BP1	0.401596	1.43034e-57	6.21253e-53	0.395	0.261	ribosomal protein S19 binding protein 1 [Source:HGNC Symbol;Acc:HGNC:28749]	up
ENSG00000146729	NIPSNAP2	-0.361793	1.58602e-57	6.88872e-53	0.185	0.31	nipsnap homolog 2 [Source:HGNC Symbol;Acc:HGNC:4179]	down
ENSG00000242372	EIF6	0.37791	1.7783e-57	7.72385e-53	0.288	0.16	eukaryotic translation initiation factor 6 [Source:HGNC Symbol;Acc:HGNC:6159]	up
ENSG00000213614	HEXA	-0.369018	1.82994e-57	7.94816e-53	0.228	0.361	hexosaminidase subunit alpha [Source:HGNC Symbol;Acc:HGNC:4878]	down
ENSG00000104885	DOT1L	0.353962	2.64159e-57	1.14735e-52	0.184	0.082	DOT1 like histone lysine methyltransferase [Source:HGNC Symbol;Acc:HGNC:24948]	up
ENSG00000115977	AAK1	-0.38828	3.01232e-57	1.30837e-52	0.319	0.462	AP2 associated kinase 1 [Source:HGNC Symbol;Acc:HGNC:19679]	down
ENSG00000074071	MRPS34	0.393414	3.16731e-57	1.37569e-52	0.324	0.207	mitochondrial ribosomal protein S34 [Source:HGNC Symbol;Acc:HGNC:16618]	up
ENSG00000276070	CCL4L2	0.711163	3.60614e-57	1.56629e-52	0.361	0.244	C-C motif chemokine ligand 4 like 2 [Source:HGNC Symbol;Acc:HGNC:24066]	up
ENSG00000124766	SOX4	0.619606	5.23178e-57	2.27237e-52	0.311	0.216	SRY-box 4 [Source:HGNC Symbol;Acc:HGNC:11200]	up
ENSG00000211896	IGHG1	-0.25709	5.37058e-57	2.33266e-52	0.025	0.088	immunoglobulin heavy constant gamma 1 (G1m marker) [Source:HGNC Symbol;Acc:HGNC:5525]	no_diff
ENSG00000152229	PSTPIP2	-0.250612	5.57604e-57	2.4219e-52	0.08	0.175	proline-serine-threonine phosphatase interacting protein 2 [Source:HGNC Symbol;Acc:HGNC:9581]	no_diff
ENSG00000107679	PLEKHA1	-0.333398	6.32378e-57	2.74667e-52	0.066	0.155	pleckstrin homology domain containing A1 [Source:HGNC Symbol;Acc:HGNC:14335]	down
ENSG00000089248	ERP29	-0.3707	7.47928e-57	3.24855e-52	0.293	0.437	endoplasmic reticulum protein 29 [Source:HGNC Symbol;Acc:HGNC:13799]	down
ENSG00000118482	PHF3	-0.354417	7.67109e-57	3.33186e-52	0.203	0.332	PHD finger protein 3 [Source:HGNC Symbol;Acc:HGNC:8921]	down
ENSG00000114770	ABCC5	-0.294619	7.70882e-57	3.34825e-52	0.062	0.153	ATP binding cassette subfamily C member 5 [Source:HGNC Symbol;Acc:HGNC:56]	down
ENSG00000224689	ZNF812P	-0.11827	8.90314e-57	3.86699e-52	0.002	0.035	zinc finger protein 812, pseudogene [Source:HGNC Symbol;Acc:HGNC:33242]	no_diff
ENSG00000177989	ODF3B	0.378182	9.7137e-57	4.21905e-52	0.171	0.074	outer dense fiber of sperm tails 3B [Source:HGNC Symbol;Acc:HGNC:34388]	up
ENSG00000244405	ETV5	-0.340077	9.76797e-57	4.24262e-52	0.09	0.191	ETS variant 5 [Source:HGNC Symbol;Acc:HGNC:3494]	down
ENSG00000158813	EDA	-0.144096	1.26246e-56	5.48339e-52	0.003	0.04	ectodysplasin A [Source:HGNC Symbol;Acc:HGNC:3157]	no_diff
ENSG00000168884	TNIP2	0.343988	2.10667e-56	9.15009e-52	0.203	0.092	TNFAIP3 interacting protein 2 [Source:HGNC Symbol;Acc:HGNC:19118]	up
ENSG00000163453	IGFBP7	-0.426051	2.11314e-56	9.17822e-52	0.293	0.429	insulin like growth factor binding protein 7 [Source:HGNC Symbol;Acc:HGNC:5476]	down
ENSG00000256525	POLG2	-0.322962	2.23782e-56	9.71976e-52	0.051	0.131	DNA polymerase gamma 2, accessory subunit [Source:HGNC Symbol;Acc:HGNC:9180]	down
ENSG00000179921	GPBAR1	-0.217571	2.56564e-56	1.11436e-51	0.034	0.106	G protein-coupled bile acid receptor 1 [Source:HGNC Symbol;Acc:HGNC:19680]	no_diff
ENSG00000128524	ATP6V1F	0.366351	2.85892e-56	1.24174e-51	0.668	0.586	ATPase H+ transporting V1 subunit F [Source:HGNC Symbol;Acc:HGNC:16832]	up
ENSG00000147853	AK3	-0.283618	3.54168e-56	1.53829e-51	0.064	0.156	adenylate kinase 3 [Source:HGNC Symbol;Acc:HGNC:17376]	down
ENSG00000142676	RPL11	-0.272195	3.71379e-56	1.61305e-51	0.941	0.969	ribosomal protein L11 [Source:HGNC Symbol;Acc:HGNC:10301]	down
ENSG00000156273	BACH1	0.433147	3.82436e-56	1.66107e-51	0.387	0.269	BTB domain and CNC homolog 1 [Source:HGNC Symbol;Acc:HGNC:935]	up
ENSG00000172053	QARS	-0.320728	3.87016e-56	1.68096e-51	0.132	0.247	glutaminyl-tRNA synthetase [Source:HGNC Symbol;Acc:HGNC:9751]	down
ENSG00000118855	MFSD1	-0.356087	4.15966e-56	1.8067e-51	0.549	0.675	major facilitator superfamily domain containing 1 [Source:HGNC Symbol;Acc:HGNC:25874]	down
ENSG00000229833	PET100	0.400284	4.32392e-56	1.87805e-51	0.292	0.17	PET100 homolog [Source:HGNC Symbol;Acc:HGNC:40038]	up
ENSG00000106028	SSBP1	0.39913	4.39764e-56	1.91007e-51	0.423	0.298	single stranded DNA binding protein 1 [Source:HGNC Symbol;Acc:HGNC:11317]	up
ENSG00000262814	MRPL12	0.326967	4.53607e-56	1.9702e-51	0.191	0.082	mitochondrial ribosomal protein L12 [Source:HGNC Symbol;Acc:HGNC:10378]	up
ENSG00000113504	SLC12A7	-0.308481	5.49426e-56	2.38638e-51	0.088	0.191	solute carrier family 12 member 7 [Source:HGNC Symbol;Acc:HGNC:10915]	down
ENSG00000116489	CAPZA1	0.385441	6.67032e-56	2.89719e-51	0.565	0.448	capping actin protein of muscle Z-line subunit alpha 1 [Source:HGNC Symbol;Acc:HGNC:1488]	up
ENSG00000172296	SPTLC3	-0.136768	6.70217e-56	2.91102e-51	0.003	0.038	serine palmitoyltransferase long chain base subunit 3 [Source:HGNC Symbol;Acc:HGNC:16253]	no_diff
ENSG00000139318	DUSP6	0.470226	6.79238e-56	2.9502e-51	0.602	0.527	dual specificity phosphatase 6 [Source:HGNC Symbol;Acc:HGNC:3072]	up
ENSG00000134987	WDR36	-0.3373	7.83134e-56	3.40146e-51	0.078	0.165	WD repeat domain 36 [Source:HGNC Symbol;Acc:HGNC:30696]	down
ENSG00000129667	RHBDF2	-0.358431	8.76557e-56	3.80724e-51	0.225	0.362	rhomboid 5 homolog 2 [Source:HGNC Symbol;Acc:HGNC:20788]	down
ENSG00000102189	EEA1	-0.375425	9.73528e-56	4.22842e-51	0.228	0.361	early endosome antigen 1 [Source:HGNC Symbol;Acc:HGNC:3185]	down
ENSG00000197451	HNRNPAB	0.407667	9.91371e-56	4.30592e-51	0.478	0.374	heterogeneous nuclear ribonucleoprotein A/B [Source:HGNC Symbol;Acc:HGNC:5034]	up
ENSG00000186431	FCAR	0.340888	1.03791e-55	4.50806e-51	0.11	0.031	Fc fragment of IgA receptor [Source:HGNC Symbol;Acc:HGNC:3608]	up
ENSG00000165119	HNRNPK	0.32	1.16474e-55	5.05895e-51	0.717	0.657	heterogeneous nuclear ribonucleoprotein K [Source:HGNC Symbol;Acc:HGNC:5044]	up
ENSG00000163606	CD200R1	-0.155425	1.20352e-55	5.22738e-51	0.006	0.049	CD200 receptor 1 [Source:HGNC Symbol;Acc:HGNC:24235]	no_diff
ENSG00000196914	ARHGEF12	-0.218803	1.20458e-55	5.23195e-51	0.029	0.097	Rho guanine nucleotide exchange factor 12 [Source:HGNC Symbol;Acc:HGNC:14193]	no_diff
ENSG00000138448	ITGAV	0.400936	1.2225e-55	5.30981e-51	0.279	0.155	integrin subunit alpha V [Source:HGNC Symbol;Acc:HGNC:6150]	up
ENSG00000224877	NDUFAF8	0.363373	1.48816e-55	6.46369e-51	0.267	0.143	NADH:ubiquinone oxidoreductase complex assembly factor 8 [Source:HGNC Symbol;Acc:HGNC:33551]	up
ENSG00000008394	MGST1	0.340842	1.8224e-55	7.91542e-51	0.224	0.106	microsomal glutathione S-transferase 1 [Source:HGNC Symbol;Acc:HGNC:7061]	up
ENSG00000198734	F5	0.20901	1.84828e-55	8.02782e-51	0.062	0.005	coagulation factor V [Source:HGNC Symbol;Acc:HGNC:3542]	no_diff
ENSG00000198937	CCDC167	0.295379	1.88439e-55	8.18465e-51	0.15	0.055	coiled-coil domain containing 167 [Source:HGNC Symbol;Acc:HGNC:21239]	up
ENSG00000003147	ICA1	-0.213629	1.98267e-55	8.61155e-51	0.022	0.084	islet cell autoantigen 1 [Source:HGNC Symbol;Acc:HGNC:5343]	no_diff
ENSG00000163428	LRRC58	-0.359819	2.47044e-55	1.07301e-50	0.159	0.279	leucine rich repeat containing 58 [Source:HGNC Symbol;Acc:HGNC:26968]	down
ENSG00000108511	HOXB6	-0.12143	3.53914e-55	1.53719e-50	0.001	0.032	homeobox B6 [Source:HGNC Symbol;Acc:HGNC:5117]	no_diff
ENSG00000134802	SLC43A3	0.40691	3.94607e-55	1.71393e-50	0.378	0.248	solute carrier family 43 member 3 [Source:HGNC Symbol;Acc:HGNC:17466]	up
ENSG00000184574	LPAR5	-0.162753	4.98816e-55	2.16656e-50	0.008	0.053	lysophosphatidic acid receptor 5 [Source:HGNC Symbol;Acc:HGNC:13307]	no_diff
ENSG00000147123	NDUFB11	0.394417	5.02607e-55	2.18302e-50	0.518	0.4	NADH:ubiquinone oxidoreductase subunit B11 [Source:HGNC Symbol;Acc:HGNC:20372]	up
ENSG00000222724	RNU2-63P	0.497379	5.056e-55	2.19602e-50	0.11	0.046	RNA, U2 small nuclear 63, pseudogene [Source:HGNC Symbol;Acc:HGNC:48556]	up
ENSG00000129993	CBFA2T3	-0.170776	5.19209e-55	2.25513e-50	0.01	0.059	CBFA2/RUNX1 translocation partner 3 [Source:HGNC Symbol;Acc:HGNC:1537]	no_diff
ENSG00000159069	FBXW5	0.374648	5.48069e-55	2.38048e-50	0.274	0.167	F-box and WD repeat domain containing 5 [Source:HGNC Symbol;Acc:HGNC:13613]	up
ENSG00000160991	ORAI2	0.319908	6.5852e-55	2.86022e-50	0.177	0.073	ORAI calcium release-activated calcium modulator 2 [Source:HGNC Symbol;Acc:HGNC:21667]	up
ENSG00000073792	IGF2BP2	0.290027	8.78654e-55	3.81635e-50	0.127	0.042	insulin like growth factor 2 mRNA binding protein 2 [Source:HGNC Symbol;Acc:HGNC:28867]	up
ENSG00000091592	NLRP1	-0.290667	9.09634e-55	3.95091e-50	0.082	0.179	NLR family pyrin domain containing 1 [Source:HGNC Symbol;Acc:HGNC:14374]	down
ENSG00000233016	SNHG7	-0.354905	9.85654e-55	4.28109e-50	0.153	0.264	small nucleolar RNA host gene 7 [Source:HGNC Symbol;Acc:HGNC:28254]	down
ENSG00000121281	ADCY7	-0.310082	1.01894e-54	4.42566e-50	0.151	0.268	adenylate cyclase 7 [Source:HGNC Symbol;Acc:HGNC:238]	down
ENSG00000189060	H1F0	-0.302083	1.13641e-54	4.93588e-50	0.068	0.161	H1 histone family member 0 [Source:HGNC Symbol;Acc:HGNC:4714]	down
ENSG00000186318	BACE1	-0.216913	1.52955e-54	6.64345e-50	0.033	0.104	beta-secretase 1 [Source:HGNC Symbol;Acc:HGNC:933]	no_diff
ENSG00000111348	ARHGDIB	0.308043	1.53491e-54	6.66672e-50	0.772	0.724	Rho GDP dissociation inhibitor beta [Source:HGNC Symbol;Acc:HGNC:679]	up
ENSG00000128512	DOCK4	0.389317	1.59565e-54	6.93055e-50	0.249	0.134	dedicator of cytokinesis 4 [Source:HGNC Symbol;Acc:HGNC:19192]	up
ENSG00000002586	CD99	-0.368463	1.59733e-54	6.93785e-50	0.577	0.693	CD99 molecule (Xg blood group) [Source:HGNC Symbol;Acc:HGNC:7082]	down
ENSG00000106245	BUD31	0.386752	1.96302e-54	8.52619e-50	0.385	0.256	BUD31 homolog [Source:HGNC Symbol;Acc:HGNC:29629]	up
ENSG00000181472	ZBTB2	-0.248559	2.19344e-54	9.52699e-50	0.061	0.146	zinc finger and BTB domain containing 2 [Source:HGNC Symbol;Acc:HGNC:20868]	no_diff
ENSG00000196502	SULT1A1	-0.305034	2.32422e-54	1.0095e-49	0.081	0.177	sulfotransferase family 1A member 1 [Source:HGNC Symbol;Acc:HGNC:11453]	down
ENSG00000075945	KIFAP3	-0.211105	2.73212e-54	1.18667e-49	0.03	0.098	kinesin associated protein 3 [Source:HGNC Symbol;Acc:HGNC:17060]	no_diff
ENSG00000171105	INSR	-0.271189	3.68736e-54	1.60157e-49	0.057	0.143	insulin receptor [Source:HGNC Symbol;Acc:HGNC:6091]	down
ENSG00000163902	RPN1	0.399305	4.16462e-54	1.80886e-49	0.476	0.363	ribophorin I [Source:HGNC Symbol;Acc:HGNC:10381]	up
ENSG00000170776	AKAP13	0.347333	4.68571e-54	2.03519e-49	0.74	0.696	A-kinase anchoring protein 13 [Source:HGNC Symbol;Acc:HGNC:371]	up
ENSG00000271533	Z83843.1	-0.208585	5.00636e-54	2.17446e-49	0.029	0.094	novel transcript, sense intronic FTX	no_diff
ENSG00000187608	ISG15	0.633159	5.15905e-54	2.24078e-49	0.241	0.159	ISG15 ubiquitin-like modifier [Source:HGNC Symbol;Acc:HGNC:4053]	up
ENSG00000131171	SH3BGRL	-0.347976	5.38854e-54	2.34046e-49	0.499	0.63	SH3 domain binding glutamate rich protein like [Source:HGNC Symbol;Acc:HGNC:10823]	down
ENSG00000099901	RANBP1	0.3886	5.57091e-54	2.41967e-49	0.31	0.194	RAN binding protein 1 [Source:HGNC Symbol;Acc:HGNC:9847]	up
ENSG00000154518	ATP5MC3	0.364737	6.17226e-54	2.68086e-49	0.513	0.428	ATP synthase membrane subunit c locus 3 [Source:HGNC Symbol;Acc:HGNC:843]	up
ENSG00000131002	TXLNGY	-0.257783	6.65878e-54	2.89217e-49	0.052	0.133	taxilin gamma pseudogene, Y-linked [Source:HGNC Symbol;Acc:HGNC:18473]	no_diff
ENSG00000186815	TPCN1	-0.324537	7.4863e-54	3.2516e-49	0.094	0.195	two pore segment channel 1 [Source:HGNC Symbol;Acc:HGNC:18182]	down
ENSG00000111961	SASH1	-0.334279	7.99675e-54	3.47331e-49	0.106	0.209	SAM and SH3 domain containing 1 [Source:HGNC Symbol;Acc:HGNC:19182]	down
ENSG00000168209	DDIT4	-0.334437	8.24693e-54	3.58197e-49	0.309	0.451	DNA damage inducible transcript 4 [Source:HGNC Symbol;Acc:HGNC:24944]	down
ENSG00000145220	LYAR	0.332823	9.81251e-54	4.26196e-49	0.212	0.1	Ly1 antibody reactive [Source:HGNC Symbol;Acc:HGNC:26021]	up
ENSG00000196369	SRGAP2B	-0.298567	1.04699e-53	4.54751e-49	0.088	0.187	SLIT-ROBO Rho GTPase activating protein 2B [Source:HGNC Symbol;Acc:HGNC:35237]	down
ENSG00000118816	CCNI	-0.338982	1.05791e-53	4.59493e-49	0.648	0.746	cyclin I [Source:HGNC Symbol;Acc:HGNC:1595]	down
ENSG00000263528	IKBKE	0.242417	1.06323e-53	4.61802e-49	0.1	0.026	inhibitor of nuclear factor kappa B kinase subunit epsilon [Source:HGNC Symbol;Acc:HGNC:14552]	no_diff
ENSG00000123908	AGO2	0.409191	1.34583e-53	5.8455e-49	0.295	0.173	argonaute RISC catalytic component 2 [Source:HGNC Symbol;Acc:HGNC:3263]	up
ENSG00000165171	METTL27	-0.100562	1.36001e-53	5.90708e-49	0.002	0.033	methyltransferase like 27 [Source:HGNC Symbol;Acc:HGNC:19068]	no_diff
ENSG00000116044	NFE2L2	-0.332489	2.65914e-53	1.15497e-48	0.546	0.67	nuclear factor, erythroid 2 like 2 [Source:HGNC Symbol;Acc:HGNC:7782]	down
ENSG00000167232	ZNF91	-0.289912	2.69296e-53	1.16966e-48	0.063	0.149	zinc finger protein 91 [Source:HGNC Symbol;Acc:HGNC:13166]	down
ENSG00000133561	GIMAP6	-0.224643	3.00715e-53	1.30613e-48	0.072	0.159	GTPase, IMAP family member 6 [Source:HGNC Symbol;Acc:HGNC:21918]	no_diff
ENSG00000145569	OTULINL	-0.306685	3.27956e-53	1.42444e-48	0.155	0.269	OTU deubiquitinase with linear linkage specificity like [Source:HGNC Symbol;Acc:HGNC:25629]	down
ENSG00000112773	TENT5A	-0.379735	4.00107e-53	1.73783e-48	0.29	0.428	terminal nucleotidyltransferase 5A [Source:HGNC Symbol;Acc:HGNC:18345]	down
ENSG00000106804	C5	-0.147856	4.3184e-53	1.87565e-48	0.008	0.052	complement C5 [Source:HGNC Symbol;Acc:HGNC:1331]	no_diff
ENSG00000130725	UBE2M	0.372621	4.6574e-53	2.0229e-48	0.311	0.19	ubiquitin conjugating enzyme E2 M [Source:HGNC Symbol;Acc:HGNC:12491]	up
ENSG00000256235	SMIM3	0.394752	4.93002e-53	2.14131e-48	0.281	0.172	small integral membrane protein 3 [Source:HGNC Symbol;Acc:HGNC:30248]	up
ENSG00000101608	MYL12A	0.304567	5.65956e-53	2.45817e-48	0.681	0.649	myosin light chain 12A [Source:HGNC Symbol;Acc:HGNC:16701]	up
ENSG00000137145	DENND4C	-0.31925	5.89209e-53	2.55917e-48	0.131	0.241	DENN domain containing 4C [Source:HGNC Symbol;Acc:HGNC:26079]	down
ENSG00000173334	TRIB1	0.461109	5.93038e-53	2.5758e-48	0.36	0.247	tribbles pseudokinase 1 [Source:HGNC Symbol;Acc:HGNC:16891]	up
ENSG00000184014	DENND5A	0.378569	5.9691e-53	2.59262e-48	0.277	0.177	DENN domain containing 5A [Source:HGNC Symbol;Acc:HGNC:19344]	up
ENSG00000148248	SURF4	0.349532	6.12165e-53	2.65888e-48	0.338	0.202	surfeit 4 [Source:HGNC Symbol;Acc:HGNC:11476]	up
ENSG00000138668	HNRNPD	0.370613	6.98782e-53	3.03509e-48	0.537	0.422	heterogeneous nuclear ribonucleoprotein D [Source:HGNC Symbol;Acc:HGNC:5036]	up
ENSG00000128881	TTBK2	-0.26248	7.07896e-53	3.07467e-48	0.049	0.128	tau tubulin kinase 2 [Source:HGNC Symbol;Acc:HGNC:19141]	down
ENSG00000282826	FRG1CP	-0.277357	7.37446e-53	3.20302e-48	0.058	0.141	FSHD region gene 1 family member C, pseudogene [Source:HGNC Symbol;Acc:HGNC:51762]	down
ENSG00000186352	ANKRD37	-0.344498	7.39679e-53	3.21272e-48	0.075	0.163	ankyrin repeat domain 37 [Source:HGNC Symbol;Acc:HGNC:29593]	down
ENSG00000189306	RRP7A	0.338361	9.50679e-53	4.12918e-48	0.238	0.121	ribosomal RNA processing 7 homolog A [Source:HGNC Symbol;Acc:HGNC:24286]	up
ENSG00000079277	MKNK1	-0.375069	1.28168e-52	5.56685e-48	0.263	0.388	MAP kinase interacting serine/threonine kinase 1 [Source:HGNC Symbol;Acc:HGNC:7110]	down
ENSG00000154582	ELOC	0.383243	1.29003e-52	5.60311e-48	0.429	0.314	elongin C [Source:HGNC Symbol;Acc:HGNC:11617]	up
ENSG00000274422	AC245060.5	-0.227885	1.39156e-52	6.04409e-48	0.013	0.064	novel transcript	no_diff
ENSG00000204220	PFDN6	0.337082	1.76991e-52	7.68744e-48	0.208	0.099	prefoldin subunit 6 [Source:HGNC Symbol;Acc:HGNC:4926]	up
ENSG00000159199	ATP5MC1	0.389045	1.88809e-52	8.20072e-48	0.318	0.206	ATP synthase membrane subunit c locus 1 [Source:HGNC Symbol;Acc:HGNC:841]	up
ENSG00000173598	NUDT4	-0.445742	1.95962e-52	8.51142e-48	0.17	0.263	nudix hydrolase 4 [Source:HGNC Symbol;Acc:HGNC:8051]	down
ENSG00000173727	AP000769.1	0.361269	1.99171e-52	8.65078e-48	0.16	0.069	Finkel-Biskis-Reilly murine sarcoma virus (FBR-MuSV) ubiquitously expressed (FAU) pseudogene	up
ENSG00000100138	SNU13	0.37464	2.70246e-52	1.17379e-47	0.485	0.388	small nuclear ribonucleoprotein 13 [Source:HGNC Symbol;Acc:HGNC:7819]	up
ENSG00000103035	PSMD7	0.391876	2.89417e-52	1.25705e-47	0.399	0.271	proteasome 26S subunit, non-ATPase 7 [Source:HGNC Symbol;Acc:HGNC:9565]	up
ENSG00000213064	SFT2D2	-0.356593	3.32844e-52	1.44567e-47	0.198	0.319	SFT2 domain containing 2 [Source:HGNC Symbol;Acc:HGNC:25140]	down
ENSG00000172922	RNASEH2C	0.369163	3.76408e-52	1.63489e-47	0.328	0.197	ribonuclease H2 subunit C [Source:HGNC Symbol;Acc:HGNC:24116]	up
ENSG00000168300	PCMTD1	-0.300188	4.09543e-52	1.77881e-47	0.125	0.235	protein-L-isoaspartate (D-aspartate) O-methyltransferase domain containing 1 [Source:HGNC Symbol;Acc:HGNC:30483]	down
ENSG00000197614	MFAP5	-0.192717	5.16545e-52	2.24356e-47	0.025	0.084	microfibril associated protein 5 [Source:HGNC Symbol;Acc:HGNC:29673]	no_diff
ENSG00000131018	SYNE1	-0.364592	5.58323e-52	2.42502e-47	0.097	0.195	spectrin repeat containing nuclear envelope protein 1 [Source:HGNC Symbol;Acc:HGNC:17089]	down
ENSG00000171860	C3AR1	-0.364994	6.04535e-52	2.62574e-47	0.412	0.543	complement C3a receptor 1 [Source:HGNC Symbol;Acc:HGNC:1319]	down
ENSG00000136521	NDUFB5	-0.332523	6.08614e-52	2.64345e-47	0.173	0.29	NADH:ubiquinone oxidoreductase subunit B5 [Source:HGNC Symbol;Acc:HGNC:7700]	down
ENSG00000116754	SRSF11	-0.357243	7.00556e-52	3.04279e-47	0.443	0.578	serine and arginine rich splicing factor 11 [Source:HGNC Symbol;Acc:HGNC:10782]	down
ENSG00000128739	SNRPN	-0.21765	7.09504e-52	3.08166e-47	0.041	0.115	small nuclear ribonucleoprotein polypeptide N [Source:HGNC Symbol;Acc:HGNC:11164]	no_diff
ENSG00000237499	AL357060.1	0.331363	7.67041e-52	3.33157e-47	0.142	0.057	novel transcript, antisense to TNFAIP3	up
ENSG00000139629	GALNT6	0.358584	8.81733e-52	3.82972e-47	0.221	0.11	polypeptide N-acetylgalactosaminyltransferase 6 [Source:HGNC Symbol;Acc:HGNC:4128]	up
ENSG00000273837	AC018755.4	0.131195	9.55868e-52	4.15172e-47	0.045	0.001	novel transcript, sense intronic to AC018755.18	no_diff
ENSG00000143977	SNRPG	0.380215	1.04527e-51	4.54005e-47	0.399	0.282	small nuclear ribonucleoprotein polypeptide G [Source:HGNC Symbol;Acc:HGNC:11163]	up
ENSG00000111666	CHPT1	-0.314157	1.13635e-51	4.93564e-47	0.102	0.2	choline phosphotransferase 1 [Source:HGNC Symbol;Acc:HGNC:17852]	down
ENSG00000168216	LMBRD1	-0.311705	1.21597e-51	5.28144e-47	0.129	0.24	LMBR1 domain containing 1 [Source:HGNC Symbol;Acc:HGNC:23038]	down
ENSG00000064763	FAR2	-0.233982	1.31849e-51	5.72673e-47	0.043	0.117	fatty acyl-CoA reductase 2 [Source:HGNC Symbol;Acc:HGNC:25531]	no_diff
ENSG00000122034	GTF3A	0.397903	1.34899e-51	5.8592e-47	0.438	0.327	general transcription factor IIIA [Source:HGNC Symbol;Acc:HGNC:4662]	up
ENSG00000197982	C1orf122	0.373334	1.3616e-51	5.91395e-47	0.279	0.165	chromosome 1 open reading frame 122 [Source:HGNC Symbol;Acc:HGNC:24789]	up
ENSG00000154874	CCDC144B	-0.176159	1.44371e-51	6.2706e-47	0.012	0.06	coiled-coil domain containing 144B (pseudogene) [Source:HGNC Symbol;Acc:HGNC:26704]	no_diff
ENSG00000185825	BCAP31	0.384739	1.55544e-51	6.75592e-47	0.456	0.331	B cell receptor associated protein 31 [Source:HGNC Symbol;Acc:HGNC:16695]	up
ENSG00000138495	COX17	0.394897	1.69821e-51	7.37601e-47	0.367	0.246	cytochrome c oxidase copper chaperone COX17 [Source:HGNC Symbol;Acc:HGNC:2264]	up
ENSG00000166595	CIAO2B	0.371706	1.71661e-51	7.45593e-47	0.416	0.285	cytosolic iron-sulfur assembly component 2B [Source:HGNC Symbol;Acc:HGNC:24261]	up
ENSG00000103876	FAH	-0.33519	3.03136e-51	1.31664e-46	0.124	0.22	fumarylacetoacetate hydrolase [Source:HGNC Symbol;Acc:HGNC:3579]	down
ENSG00000196199	MPHOSPH8	-0.3889	3.12388e-51	1.35682e-46	0.254	0.377	M-phase phosphoprotein 8 [Source:HGNC Symbol;Acc:HGNC:29810]	down
ENSG00000129084	PSMA1	0.376166	3.52032e-51	1.52902e-46	0.411	0.282	proteasome subunit alpha 1 [Source:HGNC Symbol;Acc:HGNC:9530]	up
ENSG00000146072	TNFRSF21	-0.332844	3.82573e-51	1.66167e-46	0.1	0.197	TNF receptor superfamily member 21 [Source:HGNC Symbol;Acc:HGNC:13469]	down
ENSG00000105379	ETFB	0.373786	4.06663e-51	1.7663e-46	0.32	0.203	electron transfer flavoprotein subunit beta [Source:HGNC Symbol;Acc:HGNC:3482]	up
ENSG00000157168	NRG1	0.287816	4.17657e-51	1.81405e-46	0.078	0.017	neuregulin 1 [Source:HGNC Symbol;Acc:HGNC:7997]	no_diff
ENSG00000173875	ZNF791	-0.306066	4.2144e-51	1.83048e-46	0.122	0.231	zinc finger protein 791 [Source:HGNC Symbol;Acc:HGNC:26895]	down
ENSG00000264895	AC006141.1	-0.263315	4.23464e-51	1.83927e-46	0.035	0.104	novel transcript, sense intronic to MBTD1	down
ENSG00000184602	SNN	-0.273846	4.63492e-51	2.01313e-46	0.094	0.193	stannin [Source:HGNC Symbol;Acc:HGNC:11149]	down
ENSG00000151948	GLT1D1	0.195168	5.31944e-51	2.31044e-46	0.069	0.01	glycosyltransferase 1 domain containing 1 [Source:HGNC Symbol;Acc:HGNC:26483]	no_diff
ENSG00000213694	S1PR3	0.257361	5.52332e-51	2.399e-46	0.08	0.016	sphingosine-1-phosphate receptor 3 [Source:HGNC Symbol;Acc:HGNC:3167]	no_diff
ENSG00000183684	ALYREF	0.306937	5.59006e-51	2.42799e-46	0.207	0.098	Aly/REF export factor [Source:HGNC Symbol;Acc:HGNC:19071]	up
ENSG00000236824	BCYRN1	-0.716381	7.22692e-51	3.13894e-46	0.023	0.071	brain cytoplasmic RNA 1 [Source:HGNC Symbol;Acc:HGNC:1022]	no_diff
ENSG00000284930	AC005280.2	0.190319	8.31961e-51	3.61354e-46	0.063	0.008	novel transcript	no_diff
ENSG00000103254	FAM173A	0.329235	1.26934e-50	5.51327e-46	0.222	0.111	family with sequence similarity 173 member A [Source:HGNC Symbol;Acc:HGNC:14152]	up
ENSG00000142599	RERE	-0.31197	1.75582e-50	7.62625e-46	0.137	0.249	arginine-glutamic acid dipeptide repeats [Source:HGNC Symbol;Acc:HGNC:9965]	down
ENSG00000165916	PSMC3	0.356033	1.78237e-50	7.74155e-46	0.277	0.161	proteasome 26S subunit, ATPase 3 [Source:HGNC Symbol;Acc:HGNC:9549]	up
ENSG00000247596	TWF2	0.371419	1.85374e-50	8.05154e-46	0.378	0.253	twinfilin actin binding protein 2 [Source:HGNC Symbol;Acc:HGNC:9621]	up
ENSG00000223745	CCDC18-AS1	-0.231109	1.87114e-50	8.12713e-46	0.041	0.113	CCDC18 antisense RNA 1 [Source:HGNC Symbol;Acc:HGNC:52262]	no_diff
ENSG00000198695	MT-ND6	0.431787	1.95736e-50	8.50158e-46	0.325	0.205	mitochondrially encoded NADH:ubiquinone oxidoreductase core subunit 6 [Source:HGNC Symbol;Acc:HGNC:7462]	up
ENSG00000176101	SSNA1	0.358424	2.12098e-50	9.21224e-46	0.321	0.196	SS nuclear autoantigen 1 [Source:HGNC Symbol;Acc:HGNC:11321]	up
ENSG00000173436	MICOS10	0.374074	2.59248e-50	1.12602e-45	0.354	0.238	mitochondrial contact site and cristae organizing system subunit 10 [Source:HGNC Symbol;Acc:HGNC:32068]	up
ENSG00000100280	AP1B1	-0.350633	2.61519e-50	1.13588e-45	0.292	0.423	adaptor related protein complex 1 subunit beta 1 [Source:HGNC Symbol;Acc:HGNC:554]	down
ENSG00000157500	APPL1	-0.314961	2.63788e-50	1.14574e-45	0.185	0.303	adaptor protein, phosphotyrosine interacting with PH domain and leucine zipper 1 [Source:HGNC Symbol;Acc:HGNC:24035]	down
ENSG00000198420	TCAF1	-0.219811	2.72013e-50	1.18146e-45	0.034	0.103	TRPM8 channel associated factor 1 [Source:HGNC Symbol;Acc:HGNC:22201]	no_diff
ENSG00000215788	TNFRSF25	-0.157364	2.89821e-50	1.25881e-45	0.007	0.045	TNF receptor superfamily member 25 [Source:HGNC Symbol;Acc:HGNC:11910]	no_diff
ENSG00000125430	HS3ST3B1	0.24888	3.25132e-50	1.41218e-45	0.072	0.012	heparan sulfate-glucosamine 3-sulfotransferase 3B1 [Source:HGNC Symbol;Acc:HGNC:5198]	no_diff
ENSG00000186818	LILRB4	-0.359262	3.39662e-50	1.47529e-45	0.217	0.341	leukocyte immunoglobulin like receptor B4 [Source:HGNC Symbol;Acc:HGNC:6608]	down
ENSG00000160255	ITGB2	-0.257042	3.43892e-50	1.49366e-45	0.712	0.803	integrin subunit beta 2 [Source:HGNC Symbol;Acc:HGNC:6155]	no_diff
ENSG00000182154	MRPL41	0.385411	3.5729e-50	1.55186e-45	0.424	0.314	mitochondrial ribosomal protein L41 [Source:HGNC Symbol;Acc:HGNC:14492]	up
ENSG00000127824	TUBA4A	0.380439	4.81494e-50	2.09132e-45	0.209	0.102	tubulin alpha 4a [Source:HGNC Symbol;Acc:HGNC:12407]	up
ENSG00000121067	SPOP	-0.326939	5.91321e-50	2.56834e-45	0.153	0.266	speckle type BTB/POZ protein [Source:HGNC Symbol;Acc:HGNC:11254]	down
ENSG00000168995	SIGLEC7	0.327242	7.12405e-50	3.09426e-45	0.185	0.09	sialic acid binding Ig like lectin 7 [Source:HGNC Symbol;Acc:HGNC:10876]	up
ENSG00000087088	BAX	0.373706	8.09165e-50	3.51453e-45	0.43	0.301	BCL2 associated X, apoptosis regulator [Source:HGNC Symbol;Acc:HGNC:959]	up
ENSG00000111802	TDP2	0.361745	9.16673e-50	3.98148e-45	0.247	0.132	tyrosyl-DNA phosphodiesterase 2 [Source:HGNC Symbol;Acc:HGNC:17768]	up
ENSG00000048649	RSF1	-0.317438	1.0064e-49	4.37119e-45	0.205	0.331	remodeling and spacing factor 1 [Source:HGNC Symbol;Acc:HGNC:18118]	down
ENSG00000171208	NETO2	0.293975	1.2074e-49	5.24421e-45	0.149	0.058	neuropilin and tolloid like 2 [Source:HGNC Symbol;Acc:HGNC:14644]	up
ENSG00000107537	PHYH	-0.319807	1.29348e-49	5.6181e-45	0.153	0.265	phytanoyl-CoA 2-hydroxylase [Source:HGNC Symbol;Acc:HGNC:8940]	down
ENSG00000250479	CHCHD10	-0.358148	1.59763e-49	6.93915e-45	0.298	0.433	coiled-coil-helix-coiled-coil-helix domain containing 10 [Source:HGNC Symbol;Acc:HGNC:15559]	down
ENSG00000189403	HMGB1	0.313453	1.92135e-49	8.34519e-45	0.747	0.677	high mobility group box 1 [Source:HGNC Symbol;Acc:HGNC:4983]	up
ENSG00000198879	SFMBT2	-0.316691	2.03747e-49	8.84953e-45	0.096	0.192	Scm like with four mbt domains 2 [Source:HGNC Symbol;Acc:HGNC:20256]	down
ENSG00000177410	ZFAS1	-0.33871	2.15298e-49	9.35124e-45	0.515	0.612	ZNFX1 antisense RNA 1 [Source:HGNC Symbol;Acc:HGNC:33101]	down
ENSG00000005893	LAMP2	-0.345833	2.22563e-49	9.66681e-45	0.36	0.495	lysosomal associated membrane protein 2 [Source:HGNC Symbol;Acc:HGNC:6501]	down
ENSG00000152127	MGAT5	-0.293999	2.31224e-49	1.0043e-44	0.083	0.172	alpha-1,6-mannosylglycoprotein 6-beta-N-acetylglucosaminyltransferase [Source:HGNC Symbol;Acc:HGNC:7049]	down
ENSG00000204577	LILRB3	0.392629	2.55492e-49	1.10971e-44	0.437	0.325	leukocyte immunoglobulin like receptor B3 [Source:HGNC Symbol;Acc:HGNC:6607]	up
ENSG00000047648	ARHGAP6	-0.251129	2.58263e-49	1.12174e-44	0.037	0.107	Rho GTPase activating protein 6 [Source:HGNC Symbol;Acc:HGNC:676]	no_diff
ENSG00000105939	ZC3HAV1	-0.385936	3.2457e-49	1.40974e-44	0.242	0.362	zinc finger CCCH-type containing, antiviral 1 [Source:HGNC Symbol;Acc:HGNC:23721]	down
ENSG00000100941	PNN	-0.366303	4.67533e-49	2.03068e-44	0.304	0.429	pinin, desmosome associated protein [Source:HGNC Symbol;Acc:HGNC:9162]	down
ENSG00000172270	BSG	0.374321	4.70943e-49	2.0455e-44	0.456	0.341	basigin (Ok blood group) [Source:HGNC Symbol;Acc:HGNC:1116]	up
ENSG00000113851	CRBN	-0.289195	4.99757e-49	2.17064e-44	0.106	0.204	cereblon [Source:HGNC Symbol;Acc:HGNC:30185]	down
ENSG00000197063	MAFG	-0.35547	5.19238e-49	2.25526e-44	0.231	0.354	MAF bZIP transcription factor G [Source:HGNC Symbol;Acc:HGNC:6781]	down
ENSG00000166801	FAM111A	-0.331522	5.30387e-49	2.30368e-44	0.131	0.239	family with sequence similarity 111 member A [Source:HGNC Symbol;Acc:HGNC:24725]	down
ENSG00000026297	RNASET2	-0.200813	5.64407e-49	2.45144e-44	0.532	0.656	ribonuclease T2 [Source:HGNC Symbol;Acc:HGNC:21686]	no_diff
ENSG00000078804	TP53INP2	-0.280533	5.71971e-49	2.4843e-44	0.065	0.151	tumor protein p53 inducible nuclear protein 2 [Source:HGNC Symbol;Acc:HGNC:16104]	down
ENSG00000152404	CWF19L2	-0.260126	5.86869e-49	2.54901e-44	0.081	0.17	CWF19 like cell cycle control factor 2 [Source:HGNC Symbol;Acc:HGNC:26508]	down
ENSG00000104312	RIPK2	0.393105	6.04066e-49	2.6237e-44	0.349	0.223	receptor interacting serine/threonine kinase 2 [Source:HGNC Symbol;Acc:HGNC:10020]	up
ENSG00000108829	LRRC59	0.334629	6.16152e-49	2.67619e-44	0.26	0.144	leucine rich repeat containing 59 [Source:HGNC Symbol;Acc:HGNC:28817]	up
ENSG00000153989	NUS1	0.331909	7.13533e-49	3.09916e-44	0.237	0.127	NUS1, dehydrodolichyl diphosphate synthase subunit [Source:HGNC Symbol;Acc:HGNC:21042]	up
ENSG00000121579	NAA50	0.38051	7.32335e-49	3.18082e-44	0.363	0.246	N(alpha)-acetyltransferase 50, NatE catalytic subunit [Source:HGNC Symbol;Acc:HGNC:29533]	up
ENSG00000173221	GLRX	0.378711	7.41874e-49	3.22225e-44	0.504	0.417	glutaredoxin [Source:HGNC Symbol;Acc:HGNC:4330]	up
ENSG00000092010	PSME1	0.373265	9.23546e-49	4.01133e-44	0.466	0.353	proteasome activator subunit 1 [Source:HGNC Symbol;Acc:HGNC:9568]	up
ENSG00000105197	TIMM50	0.324704	1.2466e-48	5.41447e-44	0.168	0.074	translocase of inner mitochondrial membrane 50 [Source:HGNC Symbol;Acc:HGNC:23656]	up
ENSG00000115590	IL1R2	0.641488	1.32999e-48	5.77668e-44	0.179	0.099	interleukin 1 receptor type 2 [Source:HGNC Symbol;Acc:HGNC:5994]	up
ENSG00000131196	NFATC1	-0.324338	1.52291e-48	6.61461e-44	0.08	0.17	nuclear factor of activated T cells 1 [Source:HGNC Symbol;Acc:HGNC:7775]	down
ENSG00000115307	AUP1	0.367398	2.1097e-48	9.16327e-44	0.367	0.246	AUP1, lipid droplet regulating VLDL assembly factor [Source:HGNC Symbol;Acc:HGNC:891]	up
ENSG00000163682	RPL9	-0.273309	2.27616e-48	9.88629e-44	0.876	0.911	ribosomal protein L9 [Source:HGNC Symbol;Acc:HGNC:10369]	down
ENSG00000167716	WDR81	-0.236498	2.46418e-48	1.07029e-43	0.05	0.126	WD repeat domain 81 [Source:HGNC Symbol;Acc:HGNC:26600]	no_diff
ENSG00000196576	PLXNB2	-0.318915	2.5845e-48	1.12255e-43	0.195	0.317	plexin B2 [Source:HGNC Symbol;Acc:HGNC:9104]	down
ENSG00000165168	CYBB	-0.179154	2.89169e-48	1.25597e-43	0.613	0.733	cytochrome b-245 beta chain [Source:HGNC Symbol;Acc:HGNC:2578]	no_diff
ENSG00000182004	SNRPE	0.347085	3.00176e-48	1.30378e-43	0.273	0.161	small nuclear ribonucleoprotein polypeptide E [Source:HGNC Symbol;Acc:HGNC:11161]	up
ENSG00000135114	OASL	0.250059	3.02688e-48	1.3147e-43	0.087	0.021	2'-5'-oligoadenylate synthetase like [Source:HGNC Symbol;Acc:HGNC:8090]	no_diff
ENSG00000143947	RPS27A	-0.269296	3.1178e-48	1.35419e-43	0.901	0.946	ribosomal protein S27a [Source:HGNC Symbol;Acc:HGNC:10417]	down
ENSG00000099992	TBC1D10A	-0.168687	3.1653e-48	1.37481e-43	0.026	0.085	TBC1 domain family member 10A [Source:HGNC Symbol;Acc:HGNC:23609]	no_diff
ENSG00000102898	NUTF2	0.333872	3.46383e-48	1.50448e-43	0.273	0.155	nuclear transport factor 2 [Source:HGNC Symbol;Acc:HGNC:13722]	up
ENSG00000115233	PSMD14	0.311032	3.66336e-48	1.59114e-43	0.262	0.144	proteasome 26S subunit, non-ATPase 14 [Source:HGNC Symbol;Acc:HGNC:16889]	up
ENSG00000243927	MRPS6	0.353898	4.36061e-48	1.89399e-43	0.236	0.132	mitochondrial ribosomal protein S6 [Source:HGNC Symbol;Acc:HGNC:14051]	up
ENSG00000117395	EBNA1BP2	0.288447	4.74805e-48	2.06227e-43	0.183	0.083	EBNA1 binding protein 2 [Source:HGNC Symbol;Acc:HGNC:15531]	up
ENSG00000169641	LUZP1	-0.358933	5.20095e-48	2.25898e-43	0.183	0.292	leucine zipper protein 1 [Source:HGNC Symbol;Acc:HGNC:14985]	down
ENSG00000168894	RNF181	0.371535	6.03205e-48	2.61996e-43	0.402	0.285	ring finger protein 181 [Source:HGNC Symbol;Acc:HGNC:28037]	up
ENSG00000102879	CORO1A	0.374077	6.5206e-48	2.83216e-43	0.493	0.379	coronin 1A [Source:HGNC Symbol;Acc:HGNC:2252]	up
ENSG00000092820	EZR	0.39579	6.68574e-48	2.90388e-43	0.474	0.384	ezrin [Source:HGNC Symbol;Acc:HGNC:12691]	up
ENSG00000173511	VEGFB	-0.34247	7.51151e-48	3.26255e-43	0.141	0.231	vascular endothelial growth factor B [Source:HGNC Symbol;Acc:HGNC:12681]	down
ENSG00000147324	MFHAS1	-0.281588	9.61701e-48	4.17705e-43	0.076	0.157	malignant fibrous histiocytoma amplified sequence 1 [Source:HGNC Symbol;Acc:HGNC:16982]	down
ENSG00000125520	SLC2A4RG	-0.244098	9.87411e-48	4.28872e-43	0.072	0.158	SLC2A4 regulator [Source:HGNC Symbol;Acc:HGNC:15930]	no_diff
ENSG00000110031	LPXN	0.359766	1.05069e-47	4.56355e-43	0.264	0.152	leupaxin [Source:HGNC Symbol;Acc:HGNC:14061]	up
ENSG00000126709	IFI6	0.45586	1.16065e-47	5.04116e-43	0.224	0.122	interferon alpha inducible protein 6 [Source:HGNC Symbol;Acc:HGNC:4054]	up
ENSG00000157306	ZFHX2-AS1	-0.157006	1.18803e-47	5.1601e-43	0.018	0.069	ZFHX2 antisense RNA 1 [Source:HGNC Symbol;Acc:HGNC:52658]	no_diff
ENSG00000088888	MAVS	-0.288681	1.25143e-47	5.43547e-43	0.103	0.2	mitochondrial antiviral signaling protein [Source:HGNC Symbol;Acc:HGNC:29233]	down
ENSG00000140612	SEC11A	-0.344859	1.34323e-47	5.83418e-43	0.451	0.57	SEC11 homolog A, signal peptidase complex subunit [Source:HGNC Symbol;Acc:HGNC:17718]	down
ENSG00000100731	PCNX1	0.390884	1.37743e-47	5.98274e-43	0.236	0.144	pecanex 1 [Source:HGNC Symbol;Acc:HGNC:19740]	up
ENSG00000180776	ZDHHC20	0.377191	1.44081e-47	6.258e-43	0.323	0.216	zinc finger DHHC-type containing 20 [Source:HGNC Symbol;Acc:HGNC:20749]	up
ENSG00000174738	NR1D2	-0.240739	1.44393e-47	6.27156e-43	0.067	0.149	nuclear receptor subfamily 1 group D member 2 [Source:HGNC Symbol;Acc:HGNC:7963]	no_diff
ENSG00000138398	PPIG	-0.357436	1.46721e-47	6.37269e-43	0.342	0.474	peptidylprolyl isomerase G [Source:HGNC Symbol;Acc:HGNC:14650]	down
ENSG00000138778	CENPE	-0.232767	1.55421e-47	6.75054e-43	0.027	0.088	centromere protein E [Source:HGNC Symbol;Acc:HGNC:1856]	no_diff
ENSG00000175906	ARL4D	-0.16151	1.66342e-47	7.2249e-43	0.016	0.065	ADP ribosylation factor like GTPase 4D [Source:HGNC Symbol;Acc:HGNC:656]	no_diff
ENSG00000197253	TPSB2	-0.172406	1.67684e-47	7.28318e-43	0.001	0.024	tryptase beta 2 (gene/pseudogene) [Source:HGNC Symbol;Acc:HGNC:14120]	no_diff
ENSG00000123977	DAW1	0.140146	1.89018e-47	8.2098e-43	0.037	0	dynein assembly factor with WD repeats 1 [Source:HGNC Symbol;Acc:HGNC:26383]	no_diff
ENSG00000221983	UBA52	0.243619	2.27861e-47	9.89693e-43	0.957	0.944	ubiquitin A-52 residue ribosomal protein fusion product 1 [Source:HGNC Symbol;Acc:HGNC:12458]	no_diff
ENSG00000261236	BOP1	0.287981	2.58439e-47	1.1225e-42	0.132	0.054	BOP1 ribosomal biogenesis factor [Source:HGNC Symbol;Acc:HGNC:15519]	up
ENSG00000099337	KCNK6	-0.337621	2.69362e-47	1.16994e-42	0.174	0.285	potassium two pore domain channel subfamily K member 6 [Source:HGNC Symbol;Acc:HGNC:6281]	down
ENSG00000105327	BBC3	-0.249449	2.78796e-47	1.21092e-42	0.044	0.116	BCL2 binding component 3 [Source:HGNC Symbol;Acc:HGNC:17868]	no_diff
ENSG00000122641	INHBA	0.366437	3.12221e-47	1.3561e-42	0.086	0.021	inhibin subunit beta A [Source:HGNC Symbol;Acc:HGNC:6066]	no_diff
ENSG00000172366	MCRIP2	0.296987	3.31115e-47	1.43817e-42	0.183	0.085	MAPK regulated corepressor interacting protein 2 [Source:HGNC Symbol;Acc:HGNC:14142]	up
ENSG00000188811	NHLRC3	-0.258645	3.48227e-47	1.51249e-42	0.082	0.17	NHL repeat containing 3 [Source:HGNC Symbol;Acc:HGNC:33751]	no_diff
ENSG00000080503	SMARCA2	-0.298925	3.60192e-47	1.56446e-42	0.253	0.378	SWI/SNF related, matrix associated, actin dependent regulator of chromatin, subfamily a, member 2 [Source:HGNC Symbol;Acc:HGNC:11098]	down
ENSG00000113448	PDE4D	0.328119	3.60961e-47	1.5678e-42	0.121	0.045	phosphodiesterase 4D [Source:HGNC Symbol;Acc:HGNC:8783]	up
ENSG00000148303	RPL7A	-0.264071	4.03075e-47	1.75071e-42	0.916	0.953	ribosomal protein L7a [Source:HGNC Symbol;Acc:HGNC:10364]	down
ENSG00000130830	MPP1	0.378905	4.09797e-47	1.77991e-42	0.454	0.342	membrane palmitoylated protein 1 [Source:HGNC Symbol;Acc:HGNC:7219]	up
ENSG00000169604	ANTXR1	-0.175633	4.36764e-47	1.89704e-42	0.01	0.051	ANTXR cell adhesion molecule 1 [Source:HGNC Symbol;Acc:HGNC:21014]	no_diff
ENSG00000066336	SPI1	0.30498	5.19738e-47	2.25743e-42	0.726	0.672	Spi-1 proto-oncogene [Source:HGNC Symbol;Acc:HGNC:11241]	up
ENSG00000087191	PSMC5	0.357283	5.28598e-47	2.29591e-42	0.391	0.266	proteasome 26S subunit, ATPase 5 [Source:HGNC Symbol;Acc:HGNC:9552]	up
ENSG00000178381	ZFAND2A	-0.361084	6.65902e-47	2.89228e-42	0.192	0.304	zinc finger AN1-type containing 2A [Source:HGNC Symbol;Acc:HGNC:28073]	down
ENSG00000166398	KIAA0355	-0.237295	7.39689e-47	3.21277e-42	0.042	0.114	KIAA0355 [Source:HGNC Symbol;Acc:HGNC:29016]	no_diff
ENSG00000130640	TUBGCP2	0.357179	7.99804e-47	3.47387e-42	0.319	0.201	tubulin gamma complex associated protein 2 [Source:HGNC Symbol;Acc:HGNC:18599]	up
ENSG00000178789	CD300LB	0.261139	8.1792e-47	3.55255e-42	0.102	0.031	CD300 molecule like family member b [Source:HGNC Symbol;Acc:HGNC:30811]	up
ENSG00000175416	CLTB	0.348878	8.29049e-47	3.60089e-42	0.294	0.182	clathrin light chain B [Source:HGNC Symbol;Acc:HGNC:2091]	up
ENSG00000177426	TGIF1	0.373463	8.62513e-47	3.74624e-42	0.429	0.307	TGFB induced factor homeobox 1 [Source:HGNC Symbol;Acc:HGNC:11776]	up
ENSG00000151014	NOCT	0.184534	8.96053e-47	3.89192e-42	0.07	0.012	nocturnin [Source:HGNC Symbol;Acc:HGNC:14254]	no_diff
ENSG00000174501	ANKRD36C	-0.263499	9.14216e-47	3.9708e-42	0.051	0.122	ankyrin repeat domain 36C [Source:HGNC Symbol;Acc:HGNC:32946]	down
ENSG00000211450	SELENOH	0.360932	9.29133e-47	4.03559e-42	0.384	0.273	selenoprotein H [Source:HGNC Symbol;Acc:HGNC:18251]	up
ENSG00000140564	FURIN	0.367621	1.12568e-46	4.88929e-42	0.281	0.174	furin, paired basic amino acid cleaving enzyme [Source:HGNC Symbol;Acc:HGNC:8568]	up
ENSG00000090382	LYZ	0.529578	1.15351e-46	5.01015e-42	0.809	0.746	lysozyme [Source:HGNC Symbol;Acc:HGNC:6740]	up
ENSG00000162645	GBP2	0.425686	1.2049e-46	5.23336e-42	0.359	0.25	guanylate binding protein 2 [Source:HGNC Symbol;Acc:HGNC:4183]	up
ENSG00000110046	ATG2A	-0.322901	1.23391e-46	5.35935e-42	0.104	0.202	autophagy related 2A [Source:HGNC Symbol;Acc:HGNC:29028]	down
ENSG00000112419	PHACTR2	-0.319501	1.33731e-46	5.80846e-42	0.165	0.273	phosphatase and actin regulator 2 [Source:HGNC Symbol;Acc:HGNC:20956]	down
ENSG00000139636	LMBR1L	-0.246208	1.37731e-46	5.98223e-42	0.057	0.136	limb development membrane protein 1 like [Source:HGNC Symbol;Acc:HGNC:18268]	no_diff
ENSG00000110324	IL10RA	-0.306999	1.49802e-46	6.50652e-42	0.314	0.44	interleukin 10 receptor subunit alpha [Source:HGNC Symbol;Acc:HGNC:5964]	down
ENSG00000165685	TMEM52B	0.188361	1.63051e-46	7.08196e-42	0.061	0.009	transmembrane protein 52B [Source:HGNC Symbol;Acc:HGNC:26438]	no_diff
ENSG00000158825	CDA	0.306427	1.70909e-46	7.42325e-42	0.102	0.03	cytidine deaminase [Source:HGNC Symbol;Acc:HGNC:1712]	up
ENSG00000198743	SLC5A3	-0.401295	1.85488e-46	8.05646e-42	0.124	0.218	solute carrier family 5 member 3 [Source:HGNC Symbol;Acc:HGNC:11038]	down
ENSG00000145390	USP53	-0.377692	2.08257e-46	9.04544e-42	0.136	0.242	ubiquitin specific peptidase 53 [Source:HGNC Symbol;Acc:HGNC:29255]	down
ENSG00000113971	NPHP3	-0.249428	2.17828e-46	9.46112e-42	0.058	0.135	nephrocystin 3 [Source:HGNC Symbol;Acc:HGNC:7907]	no_diff
ENSG00000185947	ZNF267	0.397022	2.28349e-46	9.91812e-42	0.385	0.265	zinc finger protein 267 [Source:HGNC Symbol;Acc:HGNC:13060]	up
ENSG00000198087	CD2AP	-0.288669	2.43027e-46	1.05557e-41	0.106	0.2	CD2 associated protein [Source:HGNC Symbol;Acc:HGNC:14258]	down
ENSG00000142046	TMEM91	-0.180209	2.5898e-46	1.12485e-41	0.037	0.1	transmembrane protein 91 [Source:HGNC Symbol;Acc:HGNC:32393]	no_diff
ENSG00000121858	TNFSF10	-0.162396	3.3099e-46	1.43762e-41	0.059	0.127	TNF superfamily member 10 [Source:HGNC Symbol;Acc:HGNC:11925]	no_diff
ENSG00000236120	AC110995.1	-0.120167	3.38117e-46	1.46858e-41	0.004	0.038	novel transcript	no_diff
ENSG00000104783	KCNN4	0.232959	3.48599e-46	1.51411e-41	0.104	0.033	potassium calcium-activated channel subfamily N member 4 [Source:HGNC Symbol;Acc:HGNC:6293]	no_diff
ENSG00000099940	SNAP29	-0.275482	3.67974e-46	1.59826e-41	0.166	0.275	synaptosome associated protein 29 [Source:HGNC Symbol;Acc:HGNC:11133]	down
ENSG00000171681	ATF7IP	-0.319084	3.7387e-46	1.62387e-41	0.155	0.266	activating transcription factor 7 interacting protein [Source:HGNC Symbol;Acc:HGNC:20092]	down
ENSG00000108599	AKAP10	-0.226968	3.92752e-46	1.70588e-41	0.08	0.164	A-kinase anchoring protein 10 [Source:HGNC Symbol;Acc:HGNC:368]	no_diff
ENSG00000134215	VAV3	0.346363	4.42445e-46	1.92172e-41	0.237	0.13	vav guanine nucleotide exchange factor 3 [Source:HGNC Symbol;Acc:HGNC:12659]	up
ENSG00000203705	TATDN3	-0.255154	5.08985e-46	2.21072e-41	0.071	0.155	TatD DNase domain containing 3 [Source:HGNC Symbol;Acc:HGNC:27010]	no_diff
ENSG00000113013	HSPA9	-0.354267	5.32478e-46	2.31276e-41	0.41	0.514	heat shock protein family A (Hsp70) member 9 [Source:HGNC Symbol;Acc:HGNC:5244]	down
ENSG00000092421	SEMA6A	-0.109701	5.34456e-46	2.32136e-41	0.001	0.028	semaphorin 6A [Source:HGNC Symbol;Acc:HGNC:10738]	no_diff
ENSG00000141552	ANAPC11	0.360447	5.77612e-46	2.5088e-41	0.436	0.313	anaphase promoting complex subunit 11 [Source:HGNC Symbol;Acc:HGNC:14452]	up
ENSG00000030419	IKZF2	-0.113434	5.83812e-46	2.53573e-41	0.004	0.036	IKAROS family zinc finger 2 [Source:HGNC Symbol;Acc:HGNC:13177]	no_diff
ENSG00000231672	DIRC3	-0.130554	6.16242e-46	2.67659e-41	0.008	0.047	disrupted in renal carcinoma 3 [Source:HGNC Symbol;Acc:HGNC:17805]	no_diff
ENSG00000143333	RGS16	-0.237693	6.72546e-46	2.92114e-41	0.028	0.087	regulator of G protein signaling 16 [Source:HGNC Symbol;Acc:HGNC:9997]	no_diff
ENSG00000111229	ARPC3	0.218521	9.15106e-46	3.97467e-41	0.863	0.859	actin related protein 2/3 complex subunit 3 [Source:HGNC Symbol;Acc:HGNC:706]	no_diff
ENSG00000103257	SLC7A5	0.308701	9.48902e-46	4.12146e-41	0.152	0.065	solute carrier family 7 member 5 [Source:HGNC Symbol;Acc:HGNC:11063]	up
ENSG00000128309	MPST	-0.255687	1.01562e-45	4.41126e-41	0.087	0.178	mercaptopyruvate sulfurtransferase [Source:HGNC Symbol;Acc:HGNC:7223]	no_diff
ENSG00000113328	CCNG1	-0.255263	1.0333e-45	4.48803e-41	0.067	0.148	cyclin G1 [Source:HGNC Symbol;Acc:HGNC:1592]	no_diff
ENSG00000072310	SREBF1	-0.307683	1.04294e-45	4.52992e-41	0.104	0.198	sterol regulatory element binding transcription factor 1 [Source:HGNC Symbol;Acc:HGNC:11289]	down
ENSG00000168079	SCARA5	-0.0997683	1.06831e-45	4.64011e-41	0.004	0.035	scavenger receptor class A member 5 [Source:HGNC Symbol;Acc:HGNC:28701]	no_diff
ENSG00000110047	EHD1	0.399414	1.09189e-45	4.74254e-41	0.25	0.144	EH domain containing 1 [Source:HGNC Symbol;Acc:HGNC:3242]	up
ENSG00000213700	RPL17P50	-0.163735	1.18877e-45	5.16332e-41	0.012	0.058	ribosomal protein L17 pseudogene 50 [Source:HGNC Symbol;Acc:HGNC:45098]	no_diff
ENSG00000257605	AC073611.2	0.197017	1.23469e-45	5.36277e-41	0.087	0.021	novel transcript, antisense to PFDN5 and C12orf10	no_diff
ENSG00000120262	CCDC170	-0.263128	1.31319e-45	5.70373e-41	0.072	0.155	coiled-coil domain containing 170 [Source:HGNC Symbol;Acc:HGNC:21177]	down
ENSG00000074964	ARHGEF10L	-0.243796	1.31884e-45	5.72825e-41	0.057	0.133	Rho guanine nucleotide exchange factor 10 like [Source:HGNC Symbol;Acc:HGNC:25540]	no_diff
ENSG00000039560	RAI14	0.192124	1.43071e-45	6.21415e-41	0.06	0.008	retinoic acid induced 14 [Source:HGNC Symbol;Acc:HGNC:14873]	no_diff
ENSG00000261472	AC084064.1	-0.0667923	1.86885e-45	8.11718e-41	0	0.02	novel transcript	no_diff
ENSG00000175294	CATSPER1	0.228174	2.05276e-45	8.91597e-41	0.1	0.03	cation channel sperm associated 1 [Source:HGNC Symbol;Acc:HGNC:17116]	no_diff
ENSG00000015475	BID	0.343293	2.19879e-45	9.55023e-41	0.301	0.192	BH3 interacting domain death agonist [Source:HGNC Symbol;Acc:HGNC:1050]	up
ENSG00000104365	IKBKB	-0.298981	2.38392e-45	1.03543e-40	0.125	0.226	inhibitor of nuclear factor kappa B kinase subunit beta [Source:HGNC Symbol;Acc:HGNC:5960]	down
ENSG00000178567	EPM2AIP1	-0.29893	2.86659e-45	1.24507e-40	0.112	0.208	EPM2A interacting protein 1 [Source:HGNC Symbol;Acc:HGNC:19735]	down
ENSG00000189129	PLAC9	-0.187463	3.19085e-45	1.38592e-40	0.022	0.076	placenta specific 9 [Source:HGNC Symbol;Acc:HGNC:19255]	no_diff
ENSG00000066294	CD84	-0.344967	3.47434e-45	1.50905e-40	0.379	0.51	CD84 molecule [Source:HGNC Symbol;Acc:HGNC:1704]	down
ENSG00000185201	IFITM2	-0.234647	3.48348e-45	1.51301e-40	0.479	0.608	interferon induced transmembrane protein 2 [Source:HGNC Symbol;Acc:HGNC:5413]	no_diff
ENSG00000149781	FERMT3	0.3613	3.55386e-45	1.54358e-40	0.491	0.381	fermitin family member 3 [Source:HGNC Symbol;Acc:HGNC:23151]	up
ENSG00000150991	UBC	-0.248172	3.73232e-45	1.62109e-40	0.932	0.961	ubiquitin C [Source:HGNC Symbol;Acc:HGNC:12468]	no_diff
ENSG00000101150	TPD52L2	0.353236	4.03038e-45	1.75055e-40	0.362	0.245	TPD52 like 2 [Source:HGNC Symbol;Acc:HGNC:12007]	up
ENSG00000197043	ANXA6	0.340258	4.60897e-45	2.00186e-40	0.226	0.123	annexin A6 [Source:HGNC Symbol;Acc:HGNC:544]	up
ENSG00000196227	FAM217B	-0.273961	4.69777e-45	2.04043e-40	0.058	0.136	family with sequence similarity 217 member B [Source:HGNC Symbol;Acc:HGNC:16170]	down
ENSG00000280138	AC027290.2	-0.41923	5.32677e-45	2.31363e-40	0.282	0.393	novel transcript	down
ENSG00000069275	NUCKS1	-0.322966	6.12677e-45	2.6611e-40	0.443	0.571	nuclear casein kinase and cyclin dependent kinase substrate 1 [Source:HGNC Symbol;Acc:HGNC:29923]	down
ENSG00000234147	AL035446.1	-0.155595	6.41738e-45	2.78733e-40	0.009	0.049	novel transcript	no_diff
ENSG00000135272	MDFIC	-0.325204	6.96145e-45	3.02363e-40	0.202	0.315	MyoD family inhibitor domain containing [Source:HGNC Symbol;Acc:HGNC:28870]	down
ENSG00000089289	IGBP1	-0.308466	7.01085e-45	3.04509e-40	0.166	0.276	immunoglobulin binding protein 1 [Source:HGNC Symbol;Acc:HGNC:5461]	down
ENSG00000005022	SLC25A5	-0.330375	7.01284e-45	3.04596e-40	0.441	0.563	solute carrier family 25 member 5 [Source:HGNC Symbol;Acc:HGNC:10991]	down
ENSG00000167641	PPP1R14A	-0.210395	7.40924e-45	3.21813e-40	0.018	0.067	protein phosphatase 1 regulatory inhibitor subunit 14A [Source:HGNC Symbol;Acc:HGNC:14871]	no_diff
ENSG00000138744	NAAA	-0.261989	8.04999e-45	3.49643e-40	0.087	0.177	N-acylethanolamine acid amidase [Source:HGNC Symbol;Acc:HGNC:736]	down
ENSG00000213741	RPS29	-0.278245	8.70399e-45	3.78049e-40	0.887	0.922	ribosomal protein S29 [Source:HGNC Symbol;Acc:HGNC:10419]	down
ENSG00000149932	TMEM219	-0.30501	8.95316e-45	3.88871e-40	0.34	0.468	transmembrane protein 219 [Source:HGNC Symbol;Acc:HGNC:25201]	down
ENSG00000008056	SYN1	0.181325	9.20606e-45	3.99856e-40	0.047	0.003	synapsin I [Source:HGNC Symbol;Acc:HGNC:11494]	no_diff
ENSG00000220412	AL356234.1	0.199512	9.38634e-45	4.07686e-40	0.059	0.008	protein tyrosine phosphatase, non-receptor type 11 (PTPN11) pseudogene	no_diff
ENSG00000118507	AKAP7	-0.19977	1.13331e-44	4.92243e-40	0.031	0.092	A-kinase anchoring protein 7 [Source:HGNC Symbol;Acc:HGNC:377]	no_diff
ENSG00000153914	SREK1	-0.357429	1.13853e-44	4.9451e-40	0.22	0.337	splicing regulatory glutamic acid and lysine rich protein 1 [Source:HGNC Symbol;Acc:HGNC:17882]	down
ENSG00000275538	RNVU1-19	0.178954	1.64427e-44	7.14173e-40	0.056	0.008	RNA, variant U1 small nuclear 19 [Source:HGNC Symbol;Acc:HGNC:48324]	no_diff
ENSG00000237541	HLA-DQA2	-0.128719	1.95766e-44	8.50291e-40	0.024	0.075	major histocompatibility complex, class II, DQ alpha 2 [Source:HGNC Symbol;Acc:HGNC:4943]	no_diff
ENSG00000104419	NDRG1	0.360965	2.39802e-44	1.04156e-39	0.221	0.131	N-myc downstream regulated 1 [Source:HGNC Symbol;Acc:HGNC:7679]	up
ENSG00000068489	PRR11	-0.128778	2.44476e-44	1.06186e-39	0.013	0.056	proline rich 11 [Source:HGNC Symbol;Acc:HGNC:25619]	no_diff
ENSG00000130731	METTL26	0.362541	3.17331e-44	1.3783e-39	0.303	0.197	methyltransferase like 26 [Source:HGNC Symbol;Acc:HGNC:14141]	up
ENSG00000101695	RNF125	-0.217676	3.1993e-44	1.38958e-39	0.046	0.114	ring finger protein 125 [Source:HGNC Symbol;Acc:HGNC:21150]	no_diff
ENSG00000167850	CD300C	0.197699	3.76579e-44	1.63563e-39	0.096	0.028	CD300c molecule [Source:HGNC Symbol;Acc:HGNC:19320]	no_diff
ENSG00000172594	SMPDL3A	-0.227835	4.10447e-44	1.78274e-39	0.058	0.133	sphingomyelin phosphodiesterase acid like 3A [Source:HGNC Symbol;Acc:HGNC:17389]	no_diff
ENSG00000267123	SCAT1	0.185707	4.37121e-44	1.89859e-39	0.068	0.012	S-phase cancer associated transcript 1 [Source:HGNC Symbol;Acc:HGNC:52930]	no_diff
ENSG00000253988	AC079015.1	-0.0660441	5.06251e-44	2.19885e-39	0	0.019	novel transcript	no_diff
ENSG00000145423	SFRP2	0.0428611	5.39811e-44	2.34461e-39	0.038	0.064	secreted frizzled related protein 2 [Source:HGNC Symbol;Acc:HGNC:10777]	no_diff
ENSG00000068366	ACSL4	0.366568	5.67838e-44	2.46635e-39	0.333	0.225	acyl-CoA synthetase long chain family member 4 [Source:HGNC Symbol;Acc:HGNC:3571]	up
ENSG00000086102	NFX1	-0.270722	5.72975e-44	2.48866e-39	0.089	0.178	nuclear transcription factor, X-box binding 1 [Source:HGNC Symbol;Acc:HGNC:7803]	down
ENSG00000125457	MIF4GD	-0.243497	6.4119e-44	2.78495e-39	0.08	0.166	MIF4G domain containing [Source:HGNC Symbol;Acc:HGNC:24030]	no_diff
ENSG00000149273	RPS3	-0.256356	6.75656e-44	2.93464e-39	0.9	0.939	ribosomal protein S3 [Source:HGNC Symbol;Acc:HGNC:10420]	no_diff
ENSG00000142657	PGD	0.353945	6.86454e-44	2.98154e-39	0.404	0.306	phosphogluconate dehydrogenase [Source:HGNC Symbol;Acc:HGNC:8891]	up
ENSG00000101421	CHMP4B	0.343691	7.02591e-44	3.05163e-39	0.307	0.193	charged multivesicular body protein 4B [Source:HGNC Symbol;Acc:HGNC:16171]	up
ENSG00000168961	LGALS9	0.282005	8.47462e-44	3.68087e-39	0.469	0.432	galectin 9 [Source:HGNC Symbol;Acc:HGNC:6570]	up
ENSG00000101307	SIRPB1	0.303268	9.14192e-44	3.9707e-39	0.164	0.077	signal regulatory protein beta 1 [Source:HGNC Symbol;Acc:HGNC:15928]	up
ENSG00000058091	CDK14	0.213377	9.30155e-44	4.04003e-39	0.083	0.021	cyclin dependent kinase 14 [Source:HGNC Symbol;Acc:HGNC:8883]	no_diff
ENSG00000255112	CHMP1B	0.389679	9.59589e-44	4.16788e-39	0.468	0.359	charged multivesicular body protein 1B [Source:HGNC Symbol;Acc:HGNC:24287]	up
ENSG00000169860	P2RY1	0.317102	1.08086e-43	4.69462e-39	0.175	0.089	purinergic receptor P2Y1 [Source:HGNC Symbol;Acc:HGNC:8539]	up
ENSG00000047634	SCML1	-0.285628	1.18219e-43	5.1347e-39	0.079	0.162	Scm polycomb group protein like 1 [Source:HGNC Symbol;Acc:HGNC:10580]	down
ENSG00000196189	SEMA4A	-0.369965	1.20418e-43	5.23023e-39	0.172	0.274	semaphorin 4A [Source:HGNC Symbol;Acc:HGNC:10729]	down
ENSG00000171604	CXXC5	0.321863	1.41831e-43	6.16029e-39	0.191	0.103	CXXC finger protein 5 [Source:HGNC Symbol;Acc:HGNC:26943]	up
ENSG00000154978	VOPP1	-0.340506	1.4295e-43	6.20888e-39	0.174	0.273	VOPP1, WBP1/VOPP1 family member [Source:HGNC Symbol;Acc:HGNC:34518]	down
ENSG00000113369	ARRDC3	-0.2952	1.50868e-43	6.55281e-39	0.313	0.444	arrestin domain containing 3 [Source:HGNC Symbol;Acc:HGNC:29263]	down
ENSG00000124177	CHD6	-0.258109	1.63533e-43	7.10288e-39	0.086	0.172	chromodomain helicase DNA binding protein 6 [Source:HGNC Symbol;Acc:HGNC:19057]	no_diff
ENSG00000143933	CALM2	-0.273439	1.67433e-43	7.27228e-39	0.706	0.803	calmodulin 2 [Source:HGNC Symbol;Acc:HGNC:1445]	down
ENSG00000114956	DGUOK	0.332414	1.75017e-43	7.60168e-39	0.276	0.169	deoxyguanosine kinase [Source:HGNC Symbol;Acc:HGNC:2858]	up
ENSG00000115828	QPCT	0.220449	1.80463e-43	7.83821e-39	0.086	0.022	glutaminyl-peptide cyclotransferase [Source:HGNC Symbol;Acc:HGNC:9753]	no_diff
ENSG00000171777	RASGRP4	-0.229794	1.95665e-43	8.49853e-39	0.064	0.141	RAS guanyl releasing protein 4 [Source:HGNC Symbol;Acc:HGNC:18958]	no_diff
ENSG00000156411	ATP5MPL	0.341634	2.14182e-43	9.3028e-39	0.534	0.44	ATP synthase membrane subunit 6.8PL [Source:HGNC Symbol;Acc:HGNC:1188]	up
ENSG00000129534	MIS18BP1	-0.308779	2.19151e-43	9.51859e-39	0.304	0.432	MIS18 binding protein 1 [Source:HGNC Symbol;Acc:HGNC:20190]	down
ENSG00000136856	SLC2A8	-0.206363	2.20914e-43	9.59516e-39	0.031	0.089	solute carrier family 2 member 8 [Source:HGNC Symbol;Acc:HGNC:13812]	no_diff
ENSG00000053372	MRTO4	0.269168	2.2237e-43	9.65844e-39	0.161	0.075	MRT4 homolog, ribosome maturation factor [Source:HGNC Symbol;Acc:HGNC:18477]	up
ENSG00000196705	ZNF431	-0.238858	2.72915e-43	1.18538e-38	0.056	0.129	zinc finger protein 431 [Source:HGNC Symbol;Acc:HGNC:20809]	no_diff
ENSG00000132669	RIN2	-0.300762	2.76235e-43	1.1998e-38	0.178	0.289	Ras and Rab interactor 2 [Source:HGNC Symbol;Acc:HGNC:18750]	down
ENSG00000210077	MT-TV	-0.267929	3.09929e-43	1.34615e-38	0.096	0.185	mitochondrially encoded tRNA-Val (GUN) [Source:HGNC Symbol;Acc:HGNC:7500]	down
ENSG00000132424	PNISR	-0.363207	3.11e-43	1.3508e-38	0.4	0.506	PNN interacting serine and arginine rich protein [Source:HGNC Symbol;Acc:HGNC:21222]	down
ENSG00000184216	IRAK1	0.35688	3.13477e-43	1.36156e-38	0.356	0.246	interleukin 1 receptor associated kinase 1 [Source:HGNC Symbol;Acc:HGNC:6112]	up
ENSG00000108239	TBC1D12	-0.252622	3.96698e-43	1.72302e-38	0.059	0.133	TBC1 domain family member 12 [Source:HGNC Symbol;Acc:HGNC:29082]	no_diff
ENSG00000071626	DAZAP1	0.327461	4.07859e-43	1.7715e-38	0.253	0.147	DAZ associated protein 1 [Source:HGNC Symbol;Acc:HGNC:2683]	up
ENSG00000162909	CAPN2	0.351196	5.08781e-43	2.20984e-38	0.355	0.242	calpain 2 [Source:HGNC Symbol;Acc:HGNC:1479]	up
ENSG00000184730	APOBR	0.333644	5.71027e-43	2.4802e-38	0.203	0.112	apolipoprotein B receptor [Source:HGNC Symbol;Acc:HGNC:24087]	up
ENSG00000171132	PRKCE	-0.149383	5.74825e-43	2.4967e-38	0.028	0.083	protein kinase C epsilon [Source:HGNC Symbol;Acc:HGNC:9401]	no_diff
ENSG00000158470	B4GALT5	0.334201	5.81473e-43	2.52557e-38	0.196	0.101	beta-1,4-galactosyltransferase 5 [Source:HGNC Symbol;Acc:HGNC:928]	up
ENSG00000136098	NEK3	-0.190357	6.59777e-43	2.86568e-38	0.031	0.088	NIMA related kinase 3 [Source:HGNC Symbol;Acc:HGNC:7746]	no_diff
ENSG00000100364	KIAA0930	-0.257349	7.01066e-43	3.04501e-38	0.217	0.331	KIAA0930 [Source:HGNC Symbol;Acc:HGNC:1314]	no_diff
ENSG00000136044	APPL2	-0.231296	8.49458e-43	3.68954e-38	0.047	0.116	adaptor protein, phosphotyrosine interacting with PH domain and leucine zipper 2 [Source:HGNC Symbol;Acc:HGNC:18242]	no_diff
ENSG00000044459	CNTLN	-0.290809	9.14153e-43	3.97053e-38	0.093	0.18	centlein [Source:HGNC Symbol;Acc:HGNC:23432]	down
ENSG00000223969	AC002456.1	0.161671	9.72021e-43	4.22187e-38	0.055	0.007	novel transcript	no_diff
ENSG00000161091	MFSD12	0.329373	1.05974e-42	4.60286e-38	0.247	0.148	major facilitator superfamily domain containing 12 [Source:HGNC Symbol;Acc:HGNC:28299]	up
ENSG00000211897	IGHG3	-0.187232	1.07641e-42	4.67526e-38	0.018	0.068	immunoglobulin heavy constant gamma 3 (G3m marker) [Source:HGNC Symbol;Acc:HGNC:5527]	no_diff
ENSG00000102893	PHKB	-0.314388	1.14029e-42	4.95275e-38	0.218	0.332	phosphorylase kinase regulatory subunit beta [Source:HGNC Symbol;Acc:HGNC:8927]	down
ENSG00000099341	PSMD8	0.340206	1.16034e-42	5.03983e-38	0.429	0.322	proteasome 26S subunit, non-ATPase 8 [Source:HGNC Symbol;Acc:HGNC:9566]	up
ENSG00000178623	GPR35	0.212119	1.21582e-42	5.2808e-38	0.069	0.014	G protein-coupled receptor 35 [Source:HGNC Symbol;Acc:HGNC:4492]	no_diff
ENSG00000005238	FAM214B	0.359159	1.25417e-42	5.44736e-38	0.323	0.226	family with sequence similarity 214 member B [Source:HGNC Symbol;Acc:HGNC:25666]	up
ENSG00000196950	SLC39A10	-0.326751	1.25824e-42	5.46502e-38	0.108	0.196	solute carrier family 39 member 10 [Source:HGNC Symbol;Acc:HGNC:20861]	down
ENSG00000197894	ADH5	-0.264674	1.26557e-42	5.49686e-38	0.117	0.21	alcohol dehydrogenase 5 (class III), chi polypeptide [Source:HGNC Symbol;Acc:HGNC:253]	down
ENSG00000143442	POGZ	-0.298271	1.3583e-42	5.89963e-38	0.137	0.235	pogo transposable element derived with ZNF domain [Source:HGNC Symbol;Acc:HGNC:18801]	down
ENSG00000133424	LARGE1	-0.107525	1.5914e-42	6.91209e-38	0.001	0.025	LARGE xylosyl- and glucuronyltransferase 1 [Source:HGNC Symbol;Acc:HGNC:6511]	no_diff
ENSG00000071242	RPS6KA2	-0.208956	1.64165e-42	7.13034e-38	0.029	0.086	ribosomal protein S6 kinase A2 [Source:HGNC Symbol;Acc:HGNC:10431]	no_diff
ENSG00000184293	CLECL1	-0.131771	1.77244e-42	7.69843e-38	0.013	0.056	C-type lectin like 1 [Source:HGNC Symbol;Acc:HGNC:24462]	no_diff
ENSG00000105701	FKBP8	0.33631	1.86511e-42	8.10093e-38	0.408	0.31	FKBP prolyl isomerase 8 [Source:HGNC Symbol;Acc:HGNC:3724]	up
ENSG00000145012	LPP	-0.275948	1.90979e-42	8.29497e-38	0.208	0.319	LIM domain containing preferred translocation partner in lipoma [Source:HGNC Symbol;Acc:HGNC:6679]	down
ENSG00000163406	SLC15A2	-0.16948	2.10079e-42	9.12459e-38	0.018	0.068	solute carrier family 15 member 2 [Source:HGNC Symbol;Acc:HGNC:10921]	no_diff
ENSG00000084623	EIF3I	0.342476	2.15947e-42	9.37943e-38	0.408	0.297	eukaryotic translation initiation factor 3 subunit I [Source:HGNC Symbol;Acc:HGNC:3272]	up
ENSG00000143183	TMCO1	0.338637	2.16178e-42	9.38946e-38	0.33	0.226	transmembrane and coiled-coil domains 1 [Source:HGNC Symbol;Acc:HGNC:18188]	up
ENSG00000197603	CPLANE1	-0.17942	2.24815e-42	9.76462e-38	0.019	0.069	ciliogenesis and planar polarity effector 1 [Source:HGNC Symbol;Acc:HGNC:25801]	no_diff
ENSG00000149187	CELF1	-0.28159	2.50768e-42	1.08919e-37	0.298	0.417	CUGBP Elav-like family member 1 [Source:HGNC Symbol;Acc:HGNC:2549]	down
ENSG00000066322	ELOVL1	0.320858	2.52855e-42	1.09825e-37	0.248	0.148	ELOVL fatty acid elongase 1 [Source:HGNC Symbol;Acc:HGNC:14418]	up
ENSG00000154122	ANKH	-0.320691	2.63907e-42	1.14626e-37	0.192	0.299	ANKH inorganic pyrophosphate transport regulator [Source:HGNC Symbol;Acc:HGNC:15492]	down
ENSG00000035928	RFC1	-0.307382	2.6978e-42	1.17176e-37	0.116	0.208	replication factor C subunit 1 [Source:HGNC Symbol;Acc:HGNC:9969]	down
ENSG00000198805	PNP	0.357241	2.90937e-42	1.26366e-37	0.361	0.248	purine nucleoside phosphorylase [Source:HGNC Symbol;Acc:HGNC:7892]	up
ENSG00000149257	SERPINH1	-0.30684	3.93419e-42	1.70878e-37	0.07	0.142	serpin family H member 1 [Source:HGNC Symbol;Acc:HGNC:1546]	down
ENSG00000174021	GNG5	0.326882	4.00022e-42	1.73746e-37	0.253	0.149	G protein subunit gamma 5 [Source:HGNC Symbol;Acc:HGNC:4408]	up
ENSG00000020577	SAMD4A	-0.160659	4.00613e-42	1.74002e-37	0.016	0.064	sterile alpha motif domain containing 4A [Source:HGNC Symbol;Acc:HGNC:23023]	no_diff
ENSG00000123636	BAZ2B	-0.313916	4.28506e-42	1.86117e-37	0.325	0.449	bromodomain adjacent to zinc finger domain 2B [Source:HGNC Symbol;Acc:HGNC:963]	down
ENSG00000198763	MT-ND2	-0.214985	4.36382e-42	1.89538e-37	0.989	0.975	mitochondrially encoded NADH:ubiquinone oxidoreductase core subunit 2 [Source:HGNC Symbol;Acc:HGNC:7456]	no_diff
ENSG00000048162	NOP16	0.226054	4.81765e-42	2.0925e-37	0.114	0.04	NOP16 nucleolar protein [Source:HGNC Symbol;Acc:HGNC:26934]	no_diff
ENSG00000275385	CCL18	-0.660681	4.97232e-42	2.15968e-37	0.023	0.075	C-C motif chemokine ligand 18 [Source:HGNC Symbol;Acc:HGNC:10616]	no_diff
ENSG00000108848	LUC7L3	-0.33371	5.06498e-42	2.19992e-37	0.394	0.515	LUC7 like 3 pre-mRNA splicing factor [Source:HGNC Symbol;Acc:HGNC:24309]	down
ENSG00000100632	ERH	0.338683	5.16342e-42	2.24268e-37	0.385	0.269	ERH, mRNA splicing and mitosis factor [Source:HGNC Symbol;Acc:HGNC:3447]	up
ENSG00000135074	ADAM19	0.195456	5.37796e-42	2.33586e-37	0.063	0.012	ADAM metallopeptidase domain 19 [Source:HGNC Symbol;Acc:HGNC:197]	no_diff
ENSG00000172322	CLEC12A	-0.211603	5.88519e-42	2.55617e-37	0.123	0.212	C-type lectin domain family 12 member A [Source:HGNC Symbol;Acc:HGNC:31713]	no_diff
ENSG00000128829	EIF2AK4	-0.29652	6.22364e-42	2.70318e-37	0.151	0.255	eukaryotic translation initiation factor 2 alpha kinase 4 [Source:HGNC Symbol;Acc:HGNC:19687]	down
ENSG00000065243	PKN2	-0.300356	6.36511e-42	2.76462e-37	0.141	0.243	protein kinase N2 [Source:HGNC Symbol;Acc:HGNC:9406]	down
ENSG00000089060	SLC8B1	-0.324338	6.78295e-42	2.94611e-37	0.153	0.254	solute carrier family 8 member B1 [Source:HGNC Symbol;Acc:HGNC:26175]	down
ENSG00000154930	ACSS1	-0.189406	7.93898e-42	3.44822e-37	0.029	0.087	acyl-CoA synthetase short chain family member 1 [Source:HGNC Symbol;Acc:HGNC:16091]	no_diff
ENSG00000102030	NAA10	0.319779	8.91304e-42	3.87129e-37	0.263	0.154	N(alpha)-acetyltransferase 10, NatA catalytic subunit [Source:HGNC Symbol;Acc:HGNC:18704]	up
ENSG00000115461	IGFBP5	-0.293197	8.99948e-42	3.90884e-37	0.056	0.125	insulin like growth factor binding protein 5 [Source:HGNC Symbol;Acc:HGNC:5474]	down
ENSG00000139112	GABARAPL1	0.383847	9.12273e-42	3.96236e-37	0.371	0.293	GABA type A receptor associated protein like 1 [Source:HGNC Symbol;Acc:HGNC:4068]	up
ENSG00000117091	CD48	0.361728	9.15962e-42	3.97839e-37	0.23	0.14	CD48 molecule [Source:HGNC Symbol;Acc:HGNC:1683]	up
ENSG00000005249	PRKAR2B	-0.166052	9.51299e-42	4.13187e-37	0.026	0.079	protein kinase cAMP-dependent type II regulatory subunit beta [Source:HGNC Symbol;Acc:HGNC:9392]	no_diff
ENSG00000151729	SLC25A4	-0.1166	1.01338e-41	4.40153e-37	0.006	0.04	solute carrier family 25 member 4 [Source:HGNC Symbol;Acc:HGNC:10990]	no_diff
ENSG00000101474	APMAP	-0.316313	1.05624e-41	4.58769e-37	0.143	0.238	adipocyte plasma membrane associated protein [Source:HGNC Symbol;Acc:HGNC:13238]	down
ENSG00000101188	NTSR1	0.164248	1.1343e-41	4.92672e-37	0.05	0.005	neurotensin receptor 1 [Source:HGNC Symbol;Acc:HGNC:8039]	no_diff
ENSG00000117625	RCOR3	-0.22358	1.21963e-41	5.29733e-37	0.082	0.163	REST corepressor 3 [Source:HGNC Symbol;Acc:HGNC:25594]	no_diff
ENSG00000170638	TRABD	0.310265	1.53783e-41	6.67942e-37	0.207	0.112	TraB domain containing [Source:HGNC Symbol;Acc:HGNC:28805]	up
ENSG00000224078	SNHG14	-0.21123	1.54566e-41	6.71344e-37	0.057	0.127	small nucleolar RNA host gene 14 [Source:HGNC Symbol;Acc:HGNC:37462]	no_diff
ENSG00000111424	VDR	0.275351	1.82783e-41	7.93901e-37	0.124	0.051	vitamin D receptor [Source:HGNC Symbol;Acc:HGNC:12679]	up
ENSG00000229117	RPL41	-0.25736	1.89677e-41	8.23841e-37	0.958	0.976	ribosomal protein L41 [Source:HGNC Symbol;Acc:HGNC:10354]	no_diff
ENSG00000189043	NDUFA4	0.322376	1.91225e-41	8.30566e-37	0.619	0.542	NDUFA4, mitochondrial complex associated [Source:HGNC Symbol;Acc:HGNC:7687]	up
ENSG00000144476	ACKR3	0.353671	1.93296e-41	8.39562e-37	0.102	0.038	atypical chemokine receptor 3 [Source:HGNC Symbol;Acc:HGNC:23692]	up
ENSG00000153310	FAM49B	0.328461	1.97505e-41	8.57842e-37	0.562	0.477	family with sequence similarity 49 member B [Source:HGNC Symbol;Acc:HGNC:25216]	up
ENSG00000212195	RF00012.43	0.184768	2.59109e-41	1.12541e-36	0.069	0.014	NA	no_diff
ENSG00000076554	TPD52	-0.110893	2.72905e-41	1.18533e-36	0.004	0.036	tumor protein D52 [Source:HGNC Symbol;Acc:HGNC:12005]	no_diff
ENSG00000182853	VMO1	0.421547	2.80797e-41	1.21961e-36	0.108	0.076	vitelline membrane outer layer 1 homolog [Source:HGNC Symbol;Acc:HGNC:30387]	up
ENSG00000273802	HIST1H2BG	-0.158544	2.83869e-41	1.23296e-36	0.013	0.055	histone cluster 1 H2B family member g [Source:HGNC Symbol;Acc:HGNC:4746]	no_diff
ENSG00000095209	TMEM38B	0.187821	2.86003e-41	1.24223e-36	0.079	0.02	transmembrane protein 38B [Source:HGNC Symbol;Acc:HGNC:25535]	no_diff
ENSG00000081791	DELE1	-0.26259	2.98893e-41	1.29821e-36	0.093	0.178	DAP3 binding cell death enhancer 1 [Source:HGNC Symbol;Acc:HGNC:28969]	down
ENSG00000139436	GIT2	-0.291469	3.11971e-41	1.35501e-36	0.147	0.249	GIT ArfGAP 2 [Source:HGNC Symbol;Acc:HGNC:4273]	down
ENSG00000139970	RTN1	-0.158127	3.16912e-41	1.37647e-36	0.026	0.08	reticulon 1 [Source:HGNC Symbol;Acc:HGNC:10467]	no_diff
ENSG00000120075	HOXB5	-0.0873151	3.33112e-41	1.44684e-36	0.001	0.023	homeobox B5 [Source:HGNC Symbol;Acc:HGNC:5116]	no_diff
ENSG00000269821	KCNQ1OT1	-0.572565	3.53765e-41	1.53654e-36	0.269	0.361	KCNQ1 opposite strand/antisense transcript 1 [Source:HGNC Symbol;Acc:HGNC:6295]	down
ENSG00000187164	SHTN1	-0.34266	3.77326e-41	1.63888e-36	0.326	0.439	shootin 1 [Source:HGNC Symbol;Acc:HGNC:29319]	down
ENSG00000186532	SMYD4	-0.257694	3.86221e-41	1.67751e-36	0.055	0.126	SET and MYND domain containing 4 [Source:HGNC Symbol;Acc:HGNC:21067]	no_diff
ENSG00000134882	UBAC2	0.336654	3.87119e-41	1.68141e-36	0.254	0.165	UBA domain containing 2 [Source:HGNC Symbol;Acc:HGNC:20486]	up
ENSG00000181192	DHTKD1	-0.168393	3.90273e-41	1.69511e-36	0.029	0.084	dehydrogenase E1 and transketolase domain containing 1 [Source:HGNC Symbol;Acc:HGNC:23537]	no_diff
ENSG00000282988	AL031777.3	-0.200046	4.19429e-41	1.82175e-36	0.017	0.063	novel protein	no_diff
ENSG00000142185	TRPM2	-0.23889	4.34944e-41	1.88913e-36	0.057	0.132	transient receptor potential cation channel subfamily M member 2 [Source:HGNC Symbol;Acc:HGNC:12339]	no_diff
ENSG00000103196	CRISPLD2	-0.266108	4.37313e-41	1.89943e-36	0.068	0.144	cysteine rich secretory protein LCCL domain containing 2 [Source:HGNC Symbol;Acc:HGNC:25248]	down
ENSG00000118689	FOXO3	-0.318168	4.59705e-41	1.99668e-36	0.502	0.622	forkhead box O3 [Source:HGNC Symbol;Acc:HGNC:3821]	down
ENSG00000197930	ERO1A	0.33149	4.87493e-41	2.11738e-36	0.256	0.167	endoplasmic reticulum oxidoreductase 1 alpha [Source:HGNC Symbol;Acc:HGNC:13280]	up
ENSG00000000938	FGR	0.375744	4.93225e-41	2.14227e-36	0.386	0.288	FGR proto-oncogene, Src family tyrosine kinase [Source:HGNC Symbol;Acc:HGNC:3697]	up
ENSG00000140455	AC007950.1	0.358113	5.21697e-41	2.26594e-36	0.353	0.25	ubiquitin specific peptidase 3 [Source:NCBI gene;Acc:9960]	up
ENSG00000198947	DMD	-0.125389	5.44428e-41	2.36467e-36	0.006	0.04	dystrophin [Source:HGNC Symbol;Acc:HGNC:2928]	no_diff
ENSG00000105755	ETHE1	-0.247559	5.64533e-41	2.45199e-36	0.094	0.182	ETHE1, persulfide dioxygenase [Source:HGNC Symbol;Acc:HGNC:23287]	no_diff
ENSG00000070882	OSBPL3	-0.190925	5.77959e-41	2.51031e-36	0.045	0.108	oxysterol binding protein like 3 [Source:HGNC Symbol;Acc:HGNC:16370]	no_diff
ENSG00000197208	SLC22A4	0.129982	5.86132e-41	2.54581e-36	0.042	0.002	solute carrier family 22 member 4 [Source:HGNC Symbol;Acc:HGNC:10968]	no_diff
ENSG00000108561	C1QBP	0.329535	6.23427e-41	2.70779e-36	0.286	0.183	complement C1q binding protein [Source:HGNC Symbol;Acc:HGNC:1243]	up
ENSG00000167613	LAIR1	0.292752	6.52443e-41	2.83382e-36	0.56	0.51	leukocyte associated immunoglobulin like receptor 1 [Source:HGNC Symbol;Acc:HGNC:6477]	up
ENSG00000175166	PSMD2	0.320974	6.92275e-41	3.00683e-36	0.284	0.178	proteasome 26S subunit, non-ATPase 2 [Source:HGNC Symbol;Acc:HGNC:9559]	up
ENSG00000101335	MYL9	-0.346986	7.44522e-41	3.23376e-36	0.062	0.122	myosin light chain 9 [Source:HGNC Symbol;Acc:HGNC:15754]	down
ENSG00000115053	NCL	0.256632	8.43734e-41	3.66467e-36	0.663	0.659	nucleolin [Source:HGNC Symbol;Acc:HGNC:7667]	no_diff
ENSG00000204438	GPANK1	-0.237564	8.7566e-41	3.80334e-36	0.078	0.156	G-patch domain and ankyrin repeats 1 [Source:HGNC Symbol;Acc:HGNC:13920]	no_diff
ENSG00000114120	SLC25A36	-0.291888	8.98488e-41	3.90249e-36	0.172	0.276	solute carrier family 25 member 36 [Source:HGNC Symbol;Acc:HGNC:25554]	down
ENSG00000256043	CTSO	-0.197124	1.13425e-40	4.92648e-36	0.049	0.117	cathepsin O [Source:HGNC Symbol;Acc:HGNC:2542]	no_diff
ENSG00000196083	IL1RAP	0.321586	1.23381e-40	5.35894e-36	0.138	0.063	interleukin 1 receptor accessory protein [Source:HGNC Symbol;Acc:HGNC:5995]	up
ENSG00000145604	SKP2	-0.141804	1.2761e-40	5.54261e-36	0.011	0.053	S-phase kinase associated protein 2 [Source:HGNC Symbol;Acc:HGNC:10901]	no_diff
ENSG00000167645	YIF1B	0.266521	1.32685e-40	5.76306e-36	0.149	0.069	Yip1 interacting factor homolog B, membrane trafficking protein [Source:HGNC Symbol;Acc:HGNC:30511]	up
ENSG00000143190	POU2F1	-0.271299	1.34931e-40	5.8606e-36	0.104	0.192	POU class 2 homeobox 1 [Source:HGNC Symbol;Acc:HGNC:9212]	down
ENSG00000118058	KMT2A	-0.269908	1.53204e-40	6.65426e-36	0.112	0.204	lysine methyltransferase 2A [Source:HGNC Symbol;Acc:HGNC:7132]	down
ENSG00000186480	INSIG1	-0.40934	1.60146e-40	6.95577e-36	0.275	0.392	insulin induced gene 1 [Source:HGNC Symbol;Acc:HGNC:6083]	down
ENSG00000185359	HGS	0.318804	1.6834e-40	7.31167e-36	0.227	0.13	hepatocyte growth factor-regulated tyrosine kinase substrate [Source:HGNC Symbol;Acc:HGNC:4897]	up
ENSG00000184164	CRELD2	0.296677	1.88363e-40	8.18137e-36	0.193	0.099	cysteine rich with EGF like domains 2 [Source:HGNC Symbol;Acc:HGNC:28150]	up
ENSG00000115286	NDUFS7	0.326365	1.88598e-40	8.19156e-36	0.299	0.193	NADH:ubiquinone oxidoreductase core subunit S7 [Source:HGNC Symbol;Acc:HGNC:7714]	up
ENSG00000181222	POLR2A	-0.32678	1.93638e-40	8.41046e-36	0.244	0.356	RNA polymerase II subunit A [Source:HGNC Symbol;Acc:HGNC:9187]	down
ENSG00000163823	CCR1	0.360991	2.01152e-40	8.73684e-36	0.401	0.303	C-C motif chemokine receptor 1 [Source:HGNC Symbol;Acc:HGNC:1602]	up
ENSG00000189180	ZNF33A	-0.243118	2.0844e-40	9.0534e-36	0.086	0.17	zinc finger protein 33A [Source:HGNC Symbol;Acc:HGNC:13096]	no_diff
ENSG00000184208	C22orf46	-0.226421	2.13762e-40	9.28455e-36	0.041	0.104	chromosome 22 open reading frame 46 [Source:HGNC Symbol;Acc:HGNC:26294]	no_diff
ENSG00000173915	ATP5MD	0.303224	2.69364e-40	1.16996e-35	0.58	0.509	ATP synthase membrane subunit DAPIT [Source:HGNC Symbol;Acc:HGNC:30889]	up
ENSG00000143226	FCGR2A	-0.333472	2.88297e-40	1.25219e-35	0.601	0.675	Fc fragment of IgG receptor IIa [Source:HGNC Symbol;Acc:HGNC:3616]	down
ENSG00000151117	TMEM86A	-0.178884	2.89759e-40	1.25854e-35	0.025	0.077	transmembrane protein 86A [Source:HGNC Symbol;Acc:HGNC:26890]	no_diff
ENSG00000285106	AC016831.7	0.170286	2.98578e-40	1.29685e-35	0.064	0.013	novel transcript	no_diff
ENSG00000069974	RAB27A	0.279784	3.1939e-40	1.38724e-35	0.16	0.074	RAB27A, member RAS oncogene family [Source:HGNC Symbol;Acc:HGNC:9766]	up
ENSG00000163219	ARHGAP25	-0.214075	4.07314e-40	1.76913e-35	0.062	0.133	Rho GTPase activating protein 25 [Source:HGNC Symbol;Acc:HGNC:28951]	no_diff
ENSG00000132846	ZBED3	-0.176408	4.36017e-40	1.8938e-35	0.023	0.073	zinc finger BED-type containing 3 [Source:HGNC Symbol;Acc:HGNC:20711]	no_diff
ENSG00000005810	MYCBP2	-0.258793	4.41854e-40	1.91915e-35	0.328	0.446	MYC binding protein 2, E3 ubiquitin protein ligase [Source:HGNC Symbol;Acc:HGNC:23386]	no_diff
ENSG00000131876	SNRPA1	0.217372	4.59652e-40	1.99645e-35	0.168	0.081	small nuclear ribonucleoprotein polypeptide A' [Source:HGNC Symbol;Acc:HGNC:11152]	no_diff
ENSG00000003402	CFLAR	0.352447	4.80026e-40	2.08495e-35	0.666	0.587	CASP8 and FADD like apoptosis regulator [Source:HGNC Symbol;Acc:HGNC:1876]	up
ENSG00000123136	DDX39A	0.30401	4.9494e-40	2.14972e-35	0.242	0.142	DExD-box helicase 39A [Source:HGNC Symbol;Acc:HGNC:17821]	up
ENSG00000152558	TMEM123	-0.160134	5.52488e-40	2.39968e-35	0.39	0.496	transmembrane protein 123 [Source:HGNC Symbol;Acc:HGNC:30138]	no_diff
ENSG00000261371	PECAM1	0.0231098	5.68061e-40	2.46732e-35	0.253	0.312	platelet and endothelial cell adhesion molecule 1 [Source:HGNC Symbol;Acc:HGNC:8823]	no_diff
ENSG00000178913	TAF7	0.345766	5.6923e-40	2.47239e-35	0.328	0.219	TATA-box binding protein associated factor 7 [Source:HGNC Symbol;Acc:HGNC:11541]	up
ENSG00000237441	RGL2	-0.24384	5.7074e-40	2.47895e-35	0.075	0.154	ral guanine nucleotide dissociation stimulator like 2 [Source:HGNC Symbol;Acc:HGNC:9769]	no_diff
ENSG00000116005	PCYOX1	-0.210131	5.80558e-40	2.52159e-35	0.057	0.126	prenylcysteine oxidase 1 [Source:HGNC Symbol;Acc:HGNC:20588]	no_diff
ENSG00000043591	ADRB1	-0.0985256	5.82985e-40	2.53214e-35	0.004	0.035	adrenoceptor beta 1 [Source:HGNC Symbol;Acc:HGNC:285]	no_diff
ENSG00000188177	ZC3H6	-0.219228	6.19298e-40	2.68986e-35	0.049	0.116	zinc finger CCCH-type containing 6 [Source:HGNC Symbol;Acc:HGNC:24762]	no_diff
ENSG00000228474	OST4	0.30453	6.76288e-40	2.93739e-35	0.638	0.56	oligosaccharyltransferase complex subunit 4, non-catalytic [Source:HGNC Symbol;Acc:HGNC:32483]	up
ENSG00000276600	RAB7B	0.207061	6.93819e-40	3.01353e-35	0.092	0.028	RAB7B, member RAS oncogene family [Source:HGNC Symbol;Acc:HGNC:30513]	no_diff
ENSG00000155438	NIFK	0.323451	7.28315e-40	3.16336e-35	0.244	0.147	nucleolar protein interacting with the FHA domain of MKI67 [Source:HGNC Symbol;Acc:HGNC:17838]	up
ENSG00000122545	SEPT7	0.319249	7.73278e-40	3.35865e-35	0.534	0.444	septin 7 [Source:HGNC Symbol;Acc:HGNC:1717]	up
ENSG00000125703	ATG4C	-0.217644	8.08685e-40	3.51244e-35	0.058	0.13	autophagy related 4C cysteine peptidase [Source:HGNC Symbol;Acc:HGNC:16040]	no_diff
ENSG00000104081	BMF	-0.157686	8.75697e-40	3.8035e-35	0.033	0.09	Bcl2 modifying factor [Source:HGNC Symbol;Acc:HGNC:24132]	no_diff
ENSG00000112110	MRPL18	-0.329746	9.44331e-40	4.10161e-35	0.32	0.408	mitochondrial ribosomal protein L18 [Source:HGNC Symbol;Acc:HGNC:14477]	down
ENSG00000182326	C1S	-0.182317	9.47497e-40	4.11536e-35	0.038	0.095	complement C1s [Source:HGNC Symbol;Acc:HGNC:1247]	no_diff
ENSG00000166068	SPRED1	-0.307433	1.0494e-39	4.55798e-35	0.191	0.299	sprouty related EVH1 domain containing 1 [Source:HGNC Symbol;Acc:HGNC:20249]	down
ENSG00000113070	HBEGF	0.344039	1.08808e-39	4.72598e-35	0.507	0.479	heparin binding EGF like growth factor [Source:HGNC Symbol;Acc:HGNC:3059]	up
ENSG00000104853	CLPTM1	0.308819	1.24245e-39	5.39646e-35	0.225	0.135	CLPTM1, transmembrane protein [Source:HGNC Symbol;Acc:HGNC:2087]	up
ENSG00000179454	KLHL28	-0.235257	1.4626e-39	6.35265e-35	0.061	0.133	kelch like family member 28 [Source:HGNC Symbol;Acc:HGNC:19741]	no_diff
ENSG00000068903	SIRT2	-0.294884	1.46665e-39	6.37026e-35	0.15	0.249	sirtuin 2 [Source:HGNC Symbol;Acc:HGNC:10886]	down
ENSG00000135363	LMO2	-0.265387	1.62472e-39	7.05681e-35	0.192	0.297	LIM domain only 2 [Source:HGNC Symbol;Acc:HGNC:6642]	down
ENSG00000188483	IER5L	0.385152	2.02293e-39	8.78641e-35	0.288	0.209	immediate early response 5 like [Source:HGNC Symbol;Acc:HGNC:23679]	up
ENSG00000010704	HFE	-0.161109	2.23804e-39	9.72069e-35	0.018	0.064	homeostatic iron regulator [Source:HGNC Symbol;Acc:HGNC:4886]	no_diff
ENSG00000185627	PSMD13	0.323332	2.42404e-39	1.05286e-34	0.328	0.222	proteasome 26S subunit, non-ATPase 13 [Source:HGNC Symbol;Acc:HGNC:9558]	up
ENSG00000170909	OSCAR	0.293807	2.45808e-39	1.06764e-34	0.147	0.074	osteoclast associated, immunoglobulin-like receptor [Source:HGNC Symbol;Acc:HGNC:29960]	up
ENSG00000155016	CYP2U1	-0.123432	2.53337e-39	1.10034e-34	0.007	0.041	cytochrome P450 family 2 subfamily U member 1 [Source:HGNC Symbol;Acc:HGNC:20582]	no_diff
ENSG00000153823	PID1	0.36601	2.71982e-39	1.18133e-34	0.243	0.162	phosphotyrosine interaction domain containing 1 [Source:HGNC Symbol;Acc:HGNC:26084]	up
ENSG00000049246	PER3	-0.173421	2.88306e-39	1.25223e-34	0.019	0.065	period circadian regulator 3 [Source:HGNC Symbol;Acc:HGNC:8847]	no_diff
ENSG00000140396	NCOA2	-0.227564	3.20267e-39	1.39105e-34	0.083	0.162	nuclear receptor coactivator 2 [Source:HGNC Symbol;Acc:HGNC:7669]	no_diff
ENSG00000163659	TIPARP	0.333092	3.58983e-39	1.5592e-34	0.347	0.297	TCDD inducible poly(ADP-ribose) polymerase [Source:HGNC Symbol;Acc:HGNC:23696]	up
ENSG00000104763	ASAH1	-0.272053	3.78439e-39	1.64371e-34	0.625	0.731	N-acylsphingosine amidohydrolase 1 [Source:HGNC Symbol;Acc:HGNC:735]	down
ENSG00000127947	PTPN12	0.332636	3.96163e-39	1.72069e-34	0.401	0.311	protein tyrosine phosphatase, non-receptor type 12 [Source:HGNC Symbol;Acc:HGNC:9645]	up
ENSG00000185880	TRIM69	0.338881	4.33542e-39	1.88304e-34	0.198	0.112	tripartite motif containing 69 [Source:HGNC Symbol;Acc:HGNC:17857]	up
ENSG00000136888	ATP6V1G1	0.29952	4.52374e-39	1.96484e-34	0.582	0.515	ATPase H+ transporting V1 subunit G1 [Source:HGNC Symbol;Acc:HGNC:864]	up
ENSG00000160014	CALM3	0.335998	4.8676e-39	2.11419e-34	0.601	0.513	calmodulin 3 [Source:HGNC Symbol;Acc:HGNC:1449]	up
ENSG00000196693	ZNF33B	-0.143063	4.88962e-39	2.12376e-34	0.018	0.063	zinc finger protein 33B [Source:HGNC Symbol;Acc:HGNC:13097]	no_diff
ENSG00000204569	PPP1R10	-0.31672	4.93342e-39	2.14278e-34	0.439	0.551	protein phosphatase 1 regulatory subunit 10 [Source:HGNC Symbol;Acc:HGNC:9284]	down
ENSG00000166548	TK2	-0.21595	6.0398e-39	2.62332e-34	0.086	0.167	thymidine kinase 2, mitochondrial [Source:HGNC Symbol;Acc:HGNC:11831]	no_diff
ENSG00000163466	ARPC2	0.172254	6.08698e-39	2.64382e-34	0.845	0.863	actin related protein 2/3 complex subunit 2 [Source:HGNC Symbol;Acc:HGNC:705]	no_diff
ENSG00000178053	MLF1	-0.143046	6.18986e-39	2.6885e-34	0.012	0.053	myeloid leukemia factor 1 [Source:HGNC Symbol;Acc:HGNC:7125]	no_diff
ENSG00000267002	AC060780.1	-0.248505	6.20786e-39	2.69632e-34	0.047	0.111	novel transcript	no_diff
ENSG00000131495	NDUFA2	0.326328	6.24452e-39	2.71224e-34	0.44	0.324	NADH:ubiquinone oxidoreductase subunit A2 [Source:HGNC Symbol;Acc:HGNC:7685]	up
ENSG00000113742	CPEB4	-0.324793	6.92376e-39	3.00727e-34	0.349	0.467	cytoplasmic polyadenylation element binding protein 4 [Source:HGNC Symbol;Acc:HGNC:21747]	down
ENSG00000171517	LPAR3	0.129434	6.98133e-39	3.03227e-34	0.035	0.002	lysophosphatidic acid receptor 3 [Source:HGNC Symbol;Acc:HGNC:14298]	no_diff
ENSG00000142684	ZNF593	0.293758	7.103e-39	3.08512e-34	0.2	0.107	zinc finger protein 593 [Source:HGNC Symbol;Acc:HGNC:30943]	up
ENSG00000084207	GSTP1	0.265221	8.68944e-39	3.77417e-34	0.674	0.649	glutathione S-transferase pi 1 [Source:HGNC Symbol;Acc:HGNC:4638]	up
ENSG00000137947	GTF2B	-0.273632	8.96904e-39	3.89561e-34	0.157	0.254	general transcription factor IIB [Source:HGNC Symbol;Acc:HGNC:4648]	down
ENSG00000114779	ABHD14B	-0.237308	1.09496e-38	4.75586e-34	0.071	0.148	abhydrolase domain containing 14B [Source:HGNC Symbol;Acc:HGNC:28235]	no_diff
ENSG00000180817	PPA1	0.303494	1.16968e-38	5.08039e-34	0.211	0.124	pyrophosphatase (inorganic) 1 [Source:HGNC Symbol;Acc:HGNC:9226]	up
ENSG00000086504	MRPL28	0.281096	1.24635e-38	5.41339e-34	0.193	0.103	mitochondrial ribosomal protein L28 [Source:HGNC Symbol;Acc:HGNC:14484]	up
ENSG00000167995	BEST1	0.27945	1.39746e-38	6.06971e-34	0.149	0.072	bestrophin 1 [Source:HGNC Symbol;Acc:HGNC:12703]	up
ENSG00000232807	AL137186.2	-0.122025	1.39917e-38	6.07715e-34	0.014	0.054	novel transcript, antisense to FBXO18	no_diff
ENSG00000177369	AC004797.1	-0.0782886	1.48784e-38	6.46228e-34	0.002	0.025	novel transcript FLJ40194	no_diff
ENSG00000128951	DUT	-0.266201	1.65286e-38	7.17902e-34	0.13	0.222	deoxyuridine triphosphatase [Source:HGNC Symbol;Acc:HGNC:3078]	down
ENSG00000162066	AMDHD2	-0.226802	1.82055e-38	7.90738e-34	0.058	0.125	amidohydrolase domain containing 2 [Source:HGNC Symbol;Acc:HGNC:24262]	no_diff
ENSG00000174917	MICOS13	0.335077	1.91179e-38	8.30365e-34	0.358	0.256	mitochondrial contact site and cristae organizing system subunit 13 [Source:HGNC Symbol;Acc:HGNC:33702]	up
ENSG00000160223	ICOSLG	-0.220264	2.02463e-38	8.79376e-34	0.057	0.128	inducible T cell costimulator ligand [Source:HGNC Symbol;Acc:HGNC:17087]	no_diff
ENSG00000196531	NACA	-0.248922	2.07397e-38	9.00809e-34	0.86	0.901	nascent polypeptide associated complex subunit alpha [Source:HGNC Symbol;Acc:HGNC:7629]	no_diff
ENSG00000146247	PHIP	-0.320047	2.09097e-38	9.08191e-34	0.314	0.433	pleckstrin homology domain interacting protein [Source:HGNC Symbol;Acc:HGNC:15673]	down
ENSG00000139793	MBNL2	-0.193488	2.10042e-38	9.12295e-34	0.103	0.185	muscleblind like splicing regulator 2 [Source:HGNC Symbol;Acc:HGNC:16746]	no_diff
ENSG00000147677	EIF3H	-0.298555	2.55938e-38	1.11164e-33	0.45	0.554	eukaryotic translation initiation factor 3 subunit H [Source:HGNC Symbol;Acc:HGNC:3273]	down
ENSG00000184988	TMEM106A	-0.295543	2.82429e-38	1.2267e-33	0.205	0.311	transmembrane protein 106A [Source:HGNC Symbol;Acc:HGNC:28288]	down
ENSG00000266274	RN7SL138P	-0.195745	3.02038e-38	1.31187e-33	0.041	0.099	RNA, 7SL, cytoplasmic 138, pseudogene [Source:HGNC Symbol;Acc:HGNC:46154]	no_diff
ENSG00000004779	NDUFAB1	0.310763	3.14399e-38	1.36556e-33	0.319	0.209	NADH:ubiquinone oxidoreductase subunit AB1 [Source:HGNC Symbol;Acc:HGNC:7694]	up
ENSG00000224032	EPB41L4A-AS1	-0.235496	3.41538e-38	1.48344e-33	0.084	0.164	EPB41L4A antisense RNA 1 [Source:HGNC Symbol;Acc:HGNC:30749]	no_diff
ENSG00000162745	OLFML2B	0.322581	3.93385e-38	1.70863e-33	0.227	0.133	olfactomedin like 2B [Source:HGNC Symbol;Acc:HGNC:24558]	up
ENSG00000182162	P2RY8	-0.129885	3.93828e-38	1.71055e-33	0.016	0.06	P2Y receptor family member 8 [Source:HGNC Symbol;Acc:HGNC:15524]	no_diff
ENSG00000223547	ZNF844	-0.193648	3.98453e-38	1.73064e-33	0.034	0.09	zinc finger protein 844 [Source:HGNC Symbol;Acc:HGNC:25932]	no_diff
ENSG00000124151	NCOA3	-0.258869	4.2236e-38	1.83448e-33	0.208	0.316	nuclear receptor coactivator 3 [Source:HGNC Symbol;Acc:HGNC:7670]	no_diff
ENSG00000100151	PICK1	-0.216988	4.75356e-38	2.06466e-33	0.047	0.112	protein interacting with PRKCA 1 [Source:HGNC Symbol;Acc:HGNC:9394]	no_diff
ENSG00000071189	SNX13	-0.278524	5.31137e-38	2.30694e-33	0.146	0.24	sorting nexin 13 [Source:HGNC Symbol;Acc:HGNC:21335]	down
ENSG00000144746	ARL6IP5	-0.304685	5.58215e-38	2.42455e-33	0.476	0.59	ADP ribosylation factor like GTPase 6 interacting protein 5 [Source:HGNC Symbol;Acc:HGNC:16937]	down
ENSG00000160094	ZNF362	-0.156932	5.65638e-38	2.45679e-33	0.027	0.08	zinc finger protein 362 [Source:HGNC Symbol;Acc:HGNC:18079]	no_diff
ENSG00000002549	LAP3	-0.279632	6.83863e-38	2.97029e-33	0.273	0.387	leucine aminopeptidase 3 [Source:HGNC Symbol;Acc:HGNC:18449]	down
ENSG00000276216	AC245014.3	0.161793	7.02039e-38	3.04924e-33	0.053	0.008	novel transcript	no_diff
ENSG00000162976	PQLC3	-0.215597	7.1305e-38	3.09706e-33	0.11	0.193	PQ loop repeat containing 3 [Source:HGNC Symbol;Acc:HGNC:28503]	no_diff
ENSG00000147251	DOCK11	-0.270201	7.58179e-38	3.29307e-33	0.17	0.273	dedicator of cytokinesis 11 [Source:HGNC Symbol;Acc:HGNC:23483]	down
ENSG00000172915	NBEA	-0.122629	7.64885e-38	3.3222e-33	0.007	0.041	neurobeachin [Source:HGNC Symbol;Acc:HGNC:7648]	no_diff
ENSG00000221869	CEBPD	-0.134451	7.66243e-38	3.3281e-33	0.785	0.864	CCAAT enhancer binding protein delta [Source:HGNC Symbol;Acc:HGNC:1835]	no_diff
ENSG00000160209	PDXK	0.326088	7.72403e-38	3.35485e-33	0.45	0.351	pyridoxal kinase [Source:HGNC Symbol;Acc:HGNC:8819]	up
ENSG00000106628	POLD2	0.2086	7.81787e-38	3.39562e-33	0.103	0.037	DNA polymerase delta 2, accessory subunit [Source:HGNC Symbol;Acc:HGNC:9176]	no_diff
ENSG00000157954	WIPI2	-0.273001	7.81794e-38	3.39564e-33	0.195	0.299	WD repeat domain, phosphoinositide interacting 2 [Source:HGNC Symbol;Acc:HGNC:32225]	down
ENSG00000123353	ORMDL2	0.278845	8.10337e-38	3.51962e-33	0.232	0.132	ORMDL sphingolipid biosynthesis regulator 2 [Source:HGNC Symbol;Acc:HGNC:16037]	up
ENSG00000115935	WIPF1	0.303983	8.39766e-38	3.64744e-33	0.553	0.486	WAS/WASL interacting protein family member 1 [Source:HGNC Symbol;Acc:HGNC:12736]	up
ENSG00000164104	HMGB2	-0.211902	8.53364e-38	3.7065e-33	0.427	0.54	high mobility group box 2 [Source:HGNC Symbol;Acc:HGNC:5000]	no_diff
ENSG00000041982	TNC	0.150173	9.37841e-38	4.07342e-33	0.038	0.002	tenascin C [Source:HGNC Symbol;Acc:HGNC:5318]	no_diff
ENSG00000159403	C1R	-0.226289	9.77647e-38	4.24631e-33	0.051	0.117	complement C1r [Source:HGNC Symbol;Acc:HGNC:1246]	no_diff
ENSG00000126457	PRMT1	0.301428	1.06257e-37	4.61517e-33	0.244	0.145	protein arginine methyltransferase 1 [Source:HGNC Symbol;Acc:HGNC:5187]	up
ENSG00000225921	NOL7	0.324973	1.1298e-37	4.90716e-33	0.36	0.255	nucleolar protein 7 [Source:HGNC Symbol;Acc:HGNC:21040]	up
ENSG00000128626	MRPS12	0.280129	1.15209e-37	5.00399e-33	0.223	0.127	mitochondrial ribosomal protein S12 [Source:HGNC Symbol;Acc:HGNC:10380]	up
ENSG00000185262	UBALD2	0.339981	1.19949e-37	5.20985e-33	0.387	0.299	UBA like domain containing 2 [Source:HGNC Symbol;Acc:HGNC:28438]	up
ENSG00000131507	NDFIP1	-0.299737	1.21568e-37	5.28018e-33	0.299	0.409	Nedd4 family interacting protein 1 [Source:HGNC Symbol;Acc:HGNC:17592]	down
ENSG00000072274	TFRC	-0.375596	1.22304e-37	5.31216e-33	0.274	0.38	transferrin receptor [Source:HGNC Symbol;Acc:HGNC:11763]	down
ENSG00000164985	PSIP1	-0.252691	1.38195e-37	6.00237e-33	0.092	0.174	PC4 and SFRS1 interacting protein 1 [Source:HGNC Symbol;Acc:HGNC:9527]	no_diff
ENSG00000239213	NCK1-DT	-0.148552	1.40925e-37	6.12096e-33	0.018	0.063	NCK1 divergent transcript [Source:HGNC Symbol;Acc:HGNC:49645]	no_diff
ENSG00000101665	SMAD7	0.295458	1.51033e-37	6.55997e-33	0.166	0.087	SMAD family member 7 [Source:HGNC Symbol;Acc:HGNC:6773]	up
ENSG00000110852	CLEC2B	-0.261526	1.55603e-37	6.75846e-33	0.266	0.379	C-type lectin domain family 2 member B [Source:HGNC Symbol;Acc:HGNC:2053]	down
ENSG00000165312	OTUD1	0.406824	1.58823e-37	6.89831e-33	0.305	0.216	OTU deubiquitinase 1 [Source:HGNC Symbol;Acc:HGNC:27346]	up
ENSG00000259392	AC090877.1	-0.192675	1.58928e-37	6.90287e-33	0.06	0.13	microtubule-associated protein 1 light chain 3 beta 2 (MAP1LC3B2) pseudogene	no_diff
ENSG00000114867	EIF4G1	0.33017	1.63398e-37	7.09701e-33	0.398	0.302	eukaryotic translation initiation factor 4 gamma 1 [Source:HGNC Symbol;Acc:HGNC:3296]	up
ENSG00000238142	BX284668.5	-0.172569	1.65868e-37	7.20429e-33	0.042	0.102	novel transcript	no_diff
ENSG00000004478	FKBP4	-0.337061	1.75295e-37	7.61377e-33	0.244	0.317	FKBP prolyl isomerase 4 [Source:HGNC Symbol;Acc:HGNC:3720]	down
ENSG00000073614	KDM5A	-0.318732	1.75596e-37	7.62683e-33	0.303	0.418	lysine demethylase 5A [Source:HGNC Symbol;Acc:HGNC:9886]	down
ENSG00000035687	ADSS	0.293343	2.03775e-37	8.85077e-33	0.237	0.138	adenylosuccinate synthase [Source:HGNC Symbol;Acc:HGNC:292]	up
ENSG00000197442	MAP3K5	-0.202632	2.23362e-37	9.70152e-33	0.082	0.16	mitogen-activated protein kinase kinase kinase 5 [Source:HGNC Symbol;Acc:HGNC:6857]	no_diff
ENSG00000125249	RAP2A	-0.268004	2.23791e-37	9.72014e-33	0.124	0.213	RAP2A, member of RAS oncogene family [Source:HGNC Symbol;Acc:HGNC:9861]	down
ENSG00000049618	ARID1B	-0.30272	2.23947e-37	9.7269e-33	0.298	0.415	AT-rich interaction domain 1B [Source:HGNC Symbol;Acc:HGNC:18040]	down
ENSG00000162923	WDR26	-0.320018	2.35376e-37	1.02233e-32	0.345	0.457	WD repeat domain 26 [Source:HGNC Symbol;Acc:HGNC:21208]	down
ENSG00000156265	MAP3K7CL	0.164237	2.36559e-37	1.02747e-32	0.047	0.006	MAP3K7 C-terminal like [Source:HGNC Symbol;Acc:HGNC:16457]	no_diff
ENSG00000074370	ATP2A3	0.166364	2.69442e-37	1.1703e-32	0.062	0.013	ATPase sarcoplasmic/endoplasmic reticulum Ca2+ transporting 3 [Source:HGNC Symbol;Acc:HGNC:813]	no_diff
ENSG00000066084	DIP2B	-0.223583	2.84538e-37	1.23586e-32	0.08	0.158	disco interacting protein 2 homolog B [Source:HGNC Symbol;Acc:HGNC:29284]	no_diff
ENSG00000198034	RPS4X	-0.163028	3.44128e-37	1.49468e-32	0.897	0.936	ribosomal protein S4 X-linked [Source:HGNC Symbol;Acc:HGNC:10424]	no_diff
ENSG00000178952	TUFM	0.311866	3.55168e-37	1.54263e-32	0.349	0.24	Tu translation elongation factor, mitochondrial [Source:HGNC Symbol;Acc:HGNC:12420]	up
ENSG00000162378	ZYG11B	-0.24858	3.66286e-37	1.59093e-32	0.126	0.213	zyg-11 family member B, cell cycle regulator [Source:HGNC Symbol;Acc:HGNC:25820]	no_diff
ENSG00000185477	GPRIN3	0.354282	3.72201e-37	1.61662e-32	0.289	0.192	GPRIN family member 3 [Source:HGNC Symbol;Acc:HGNC:27733]	up
ENSG00000214176	PLEKHM1P1	-0.211279	3.91677e-37	1.70121e-32	0.063	0.131	pleckstrin homology and RUN domain containing M1 pseudogene 1 [Source:HGNC Symbol;Acc:HGNC:35411]	no_diff
ENSG00000135250	SRPK2	-0.21449	4.14189e-37	1.79899e-32	0.091	0.169	SRSF protein kinase 2 [Source:HGNC Symbol;Acc:HGNC:11306]	no_diff
ENSG00000124575	HIST1H1D	-0.190182	4.22798e-37	1.83638e-32	0.03	0.085	histone cluster 1 H1 family member d [Source:HGNC Symbol;Acc:HGNC:4717]	no_diff
ENSG00000186395	KRT10	0.326461	4.26883e-37	1.85412e-32	0.385	0.28	keratin 10 [Source:HGNC Symbol;Acc:HGNC:6413]	up
ENSG00000130024	PHF10	0.303234	4.93359e-37	2.14286e-32	0.187	0.099	PHD finger protein 10 [Source:HGNC Symbol;Acc:HGNC:18250]	up
ENSG00000032444	PNPLA6	0.31796	4.96141e-37	2.15494e-32	0.261	0.165	patatin like phospholipase domain containing 6 [Source:HGNC Symbol;Acc:HGNC:16268]	up
ENSG00000274210	RF00003.10	0.136509	4.9733e-37	2.1601e-32	0.045	0.006	NA	no_diff
ENSG00000129422	MTUS1	-0.171821	5.37632e-37	2.33515e-32	0.02	0.066	microtubule associated scaffold protein 1 [Source:HGNC Symbol;Acc:HGNC:29789]	no_diff
ENSG00000231752	EMBP1	-0.145995	5.48224e-37	2.38116e-32	0.007	0.039	embigin pseudogene 1 [Source:HGNC Symbol;Acc:HGNC:38661]	no_diff
ENSG00000174348	PODN	-0.0934894	5.83909e-37	2.53615e-32	0.005	0.032	podocan [Source:HGNC Symbol;Acc:HGNC:23174]	no_diff
ENSG00000186834	HEXIM1	-0.329207	5.88721e-37	2.55705e-32	0.199	0.294	HEXIM P-TEFb complex subunit 1 [Source:HGNC Symbol;Acc:HGNC:24953]	down
ENSG00000015153	YAF2	-0.254716	6.22495e-37	2.70375e-32	0.113	0.197	YY1 associated factor 2 [Source:HGNC Symbol;Acc:HGNC:17363]	no_diff
ENSG00000179542	SLITRK4	-0.16703	6.44585e-37	2.79969e-32	0.018	0.063	SLIT and NTRK like family member 4 [Source:HGNC Symbol;Acc:HGNC:23502]	no_diff
ENSG00000158201	ABHD3	-0.274506	6.49196e-37	2.81972e-32	0.111	0.196	abhydrolase domain containing 3 [Source:HGNC Symbol;Acc:HGNC:18718]	down
ENSG00000165494	PCF11	-0.320187	6.66939e-37	2.89678e-32	0.45	0.56	PCF11, cleavage and polyadenylation factor subunit [Source:HGNC Symbol;Acc:HGNC:30097]	down
ENSG00000074416	MGLL	-0.28568	6.69036e-37	2.90589e-32	0.122	0.21	monoglyceride lipase [Source:HGNC Symbol;Acc:HGNC:17038]	down
ENSG00000196507	TCEAL3	-0.288269	6.96986e-37	3.02729e-32	0.115	0.198	transcription elongation factor A like 3 [Source:HGNC Symbol;Acc:HGNC:28247]	down
ENSG00000281969	AL592158.1	-0.0751049	7.31613e-37	3.17769e-32	0.001	0.022	TEC	no_diff
ENSG00000136758	YME1L1	-0.313253	7.64003e-37	3.31837e-32	0.539	0.609	YME1 like 1 ATPase [Source:HGNC Symbol;Acc:HGNC:12843]	down
ENSG00000065413	ANKRD44	-0.206334	8.56733e-37	3.72114e-32	0.132	0.215	ankyrin repeat domain 44 [Source:HGNC Symbol;Acc:HGNC:25259]	no_diff
ENSG00000118363	SPCS2	0.319093	8.57651e-37	3.72512e-32	0.363	0.254	signal peptidase complex subunit 2 [Source:HGNC Symbol;Acc:HGNC:28962]	up
ENSG00000270069	MIR222HG	0.283903	8.85833e-37	3.84753e-32	0.139	0.064	miR222/221 cluster host gene [Source:HGNC Symbol;Acc:HGNC:49555]	up
ENSG00000143344	RGL1	-0.319441	9.24966e-37	4.0175e-32	0.241	0.349	ral guanine nucleotide dissociation stimulator like 1 [Source:HGNC Symbol;Acc:HGNC:30281]	down
ENSG00000175768	TOMM5	0.238231	9.4725e-37	4.11429e-32	0.166	0.081	translocase of outer mitochondrial membrane 5 [Source:HGNC Symbol;Acc:HGNC:31369]	no_diff
ENSG00000090924	PLEKHG2	0.333819	9.60859e-37	4.1734e-32	0.25	0.157	pleckstrin homology and RhoGEF domain containing G2 [Source:HGNC Symbol;Acc:HGNC:29515]	up
ENSG00000198829	SUCNR1	-0.162329	1.06683e-36	4.63368e-32	0.022	0.068	succinate receptor 1 [Source:HGNC Symbol;Acc:HGNC:4542]	no_diff
ENSG00000102755	FLT1	0.19693	1.23401e-36	5.35981e-32	0.069	0.017	fms related tyrosine kinase 1 [Source:HGNC Symbol;Acc:HGNC:3763]	no_diff
ENSG00000112299	VNN1	-0.172553	1.29976e-36	5.64539e-32	0.029	0.083	vanin 1 [Source:HGNC Symbol;Acc:HGNC:12705]	no_diff
ENSG00000136003	ISCU	-0.274377	1.32497e-36	5.75489e-32	0.237	0.343	iron-sulfur cluster assembly enzyme [Source:HGNC Symbol;Acc:HGNC:29882]	down
ENSG00000149927	DOC2A	-0.077404	1.38853e-36	6.03095e-32	0.001	0.018	double C2 domain alpha [Source:HGNC Symbol;Acc:HGNC:2985]	no_diff
ENSG00000165434	PGM2L1	-0.209596	1.39139e-36	6.04338e-32	0.041	0.1	phosphoglucomutase 2 like 1 [Source:HGNC Symbol;Acc:HGNC:20898]	no_diff
ENSG00000006576	PHTF2	-0.219352	1.41226e-36	6.13401e-32	0.089	0.165	putative homeodomain transcription factor 2 [Source:HGNC Symbol;Acc:HGNC:13411]	no_diff
ENSG00000138182	KIF20B	-0.232917	1.4442e-36	6.27275e-32	0.059	0.125	kinesin family member 20B [Source:HGNC Symbol;Acc:HGNC:7212]	no_diff
ENSG00000140398	NEIL1	-0.116795	1.53299e-36	6.65839e-32	0.007	0.041	nei like DNA glycosylase 1 [Source:HGNC Symbol;Acc:HGNC:18448]	no_diff
ENSG00000165732	DDX21	0.298016	1.55924e-36	6.7724e-32	0.561	0.507	DExD-box helicase 21 [Source:HGNC Symbol;Acc:HGNC:2744]	up
ENSG00000143891	GALM	-0.265123	1.56899e-36	6.81475e-32	0.086	0.157	galactose mutarotase [Source:HGNC Symbol;Acc:HGNC:24063]	down
ENSG00000010278	CD9	0.386833	1.59219e-36	6.91553e-32	0.206	0.14	CD9 molecule [Source:HGNC Symbol;Acc:HGNC:1709]	up
ENSG00000118308	LRMP	-0.182877	1.70939e-36	7.42455e-32	0.053	0.117	lymphoid restricted membrane protein [Source:HGNC Symbol;Acc:HGNC:6690]	no_diff
ENSG00000215114	UBXN2B	0.266329	1.78179e-36	7.73903e-32	0.171	0.086	UBX domain protein 2B [Source:HGNC Symbol;Acc:HGNC:27035]	up
ENSG00000125454	SLC25A19	0.256382	1.80639e-36	7.84589e-32	0.155	0.073	solute carrier family 25 member 19 [Source:HGNC Symbol;Acc:HGNC:14409]	no_diff
ENSG00000115128	SF3B6	0.317365	1.83695e-36	7.97859e-32	0.374	0.272	splicing factor 3b subunit 6 [Source:HGNC Symbol;Acc:HGNC:30096]	up
ENSG00000151694	ADAM17	0.335249	2.04578e-36	8.88564e-32	0.497	0.412	ADAM metallopeptidase domain 17 [Source:HGNC Symbol;Acc:HGNC:195]	up
ENSG00000114315	HES1	-0.152004	2.21652e-36	9.62721e-32	0.103	0.176	hes family bHLH transcription factor 1 [Source:HGNC Symbol;Acc:HGNC:5192]	no_diff
ENSG00000010295	IFFO1	-0.192701	2.27475e-36	9.88014e-32	0.056	0.122	intermediate filament family orphan 1 [Source:HGNC Symbol;Acc:HGNC:24970]	no_diff
ENSG00000106617	PRKAG2	0.340181	2.60166e-36	1.13e-31	0.299	0.213	protein kinase AMP-activated non-catalytic subunit gamma 2 [Source:HGNC Symbol;Acc:HGNC:9386]	up
ENSG00000147535	PLPP5	0.202927	2.63452e-36	1.14428e-31	0.123	0.051	phospholipid phosphatase 5 [Source:HGNC Symbol;Acc:HGNC:25026]	no_diff
ENSG00000062716	VMP1	0.329132	2.84731e-36	1.2367e-31	0.581	0.527	vacuole membrane protein 1 [Source:HGNC Symbol;Acc:HGNC:29559]	up
ENSG00000164938	TP53INP1	-0.168188	3.44562e-36	1.49657e-31	0.036	0.092	tumor protein p53 inducible nuclear protein 1 [Source:HGNC Symbol;Acc:HGNC:18022]	no_diff
ENSG00000181444	ZNF467	-0.211642	3.47265e-36	1.50831e-31	0.078	0.154	zinc finger protein 467 [Source:HGNC Symbol;Acc:HGNC:23154]	no_diff
ENSG00000228300	C19orf24	0.294095	3.64125e-36	1.58154e-31	0.297	0.19	chromosome 19 open reading frame 24 [Source:HGNC Symbol;Acc:HGNC:26073]	up
ENSG00000132471	WBP2	-0.279545	4.17779e-36	1.81458e-31	0.211	0.315	WW domain binding protein 2 [Source:HGNC Symbol;Acc:HGNC:12738]	down
ENSG00000067064	IDI1	-0.280997	5.26309e-36	2.28597e-31	0.297	0.405	isopentenyl-diphosphate delta isomerase 1 [Source:HGNC Symbol;Acc:HGNC:5387]	down
ENSG00000175155	YPEL2	-0.239228	5.58121e-36	2.42414e-31	0.172	0.271	yippee like 2 [Source:HGNC Symbol;Acc:HGNC:18326]	no_diff
ENSG00000096717	SIRT1	-0.254264	5.94755e-36	2.58326e-31	0.122	0.207	sirtuin 1 [Source:HGNC Symbol;Acc:HGNC:14929]	no_diff
ENSG00000170540	ARL6IP1	-0.303719	5.98542e-36	2.59971e-31	0.357	0.466	ADP ribosylation factor like GTPase 6 interacting protein 1 [Source:HGNC Symbol;Acc:HGNC:697]	down
ENSG00000167565	SERTAD3	-0.245612	7.40382e-36	3.21577e-31	0.102	0.187	SERTA domain containing 3 [Source:HGNC Symbol;Acc:HGNC:17931]	no_diff
ENSG00000139514	SLC7A1	0.165461	8.33519e-36	3.62031e-31	0.078	0.022	solute carrier family 7 member 1 [Source:HGNC Symbol;Acc:HGNC:11057]	no_diff
ENSG00000165233	CARD19	0.294804	8.33712e-36	3.62115e-31	0.242	0.146	caspase recruitment domain family member 19 [Source:HGNC Symbol;Acc:HGNC:28148]	up
ENSG00000188186	LAMTOR4	0.293041	8.38218e-36	3.64072e-31	0.64	0.564	late endosomal/lysosomal adaptor, MAPK and MTOR activator 4 [Source:HGNC Symbol;Acc:HGNC:33772]	up
ENSG00000149577	SIDT2	-0.237893	8.51492e-36	3.69837e-31	0.114	0.199	SID1 transmembrane family member 2 [Source:HGNC Symbol;Acc:HGNC:24272]	no_diff
ENSG00000165795	NDRG2	-0.112152	8.61556e-36	3.74208e-31	0.01	0.046	NDRG family member 2 [Source:HGNC Symbol;Acc:HGNC:14460]	no_diff
ENSG00000125877	ITPA	0.277582	8.73082e-36	3.79215e-31	0.239	0.141	inosine triphosphatase [Source:HGNC Symbol;Acc:HGNC:6176]	up
ENSG00000068137	PLEKHH3	-0.127606	8.86784e-36	3.85166e-31	0.011	0.049	pleckstrin homology, MyTH4 and FERM domain containing H3 [Source:HGNC Symbol;Acc:HGNC:26105]	no_diff
ENSG00000022267	FHL1	-0.152583	9.69434e-36	4.21064e-31	0.015	0.056	four and a half LIM domains 1 [Source:HGNC Symbol;Acc:HGNC:3702]	no_diff
ENSG00000170027	YWHAG	0.323626	1.04439e-35	4.53622e-31	0.441	0.342	tyrosine 3-monooxygenase/tryptophan 5-monooxygenase activation protein gamma [Source:HGNC Symbol;Acc:HGNC:12852]	up
ENSG00000139266	MARCH9	-0.164628	1.15142e-35	5.00109e-31	0.028	0.08	membrane associated ring-CH-type finger 9 [Source:HGNC Symbol;Acc:HGNC:25139]	no_diff
ENSG00000125870	SNRPB2	0.293407	1.24593e-35	5.41159e-31	0.347	0.235	small nuclear ribonucleoprotein polypeptide B2 [Source:HGNC Symbol;Acc:HGNC:11155]	up
ENSG00000203799	CCDC162P	-0.0975295	1.27558e-35	5.54036e-31	0.003	0.029	coiled-coil domain containing 162, pseudogene [Source:HGNC Symbol;Acc:HGNC:21565]	no_diff
ENSG00000129493	HEATR5A	-0.169228	1.32148e-35	5.73971e-31	0.047	0.107	HEAT repeat containing 5A [Source:HGNC Symbol;Acc:HGNC:20276]	no_diff
ENSG00000092068	SLC7A8	-0.325958	1.51017e-35	6.55925e-31	0.183	0.28	solute carrier family 7 member 8 [Source:HGNC Symbol;Acc:HGNC:11066]	down
ENSG00000172380	GNG12	-0.176869	1.52019e-35	6.60279e-31	0.024	0.068	G protein subunit gamma 12 [Source:HGNC Symbol;Acc:HGNC:19663]	no_diff
ENSG00000125753	VASP	0.304303	1.55541e-35	6.75577e-31	0.588	0.503	vasodilator stimulated phosphoprotein [Source:HGNC Symbol;Acc:HGNC:12652]	up
ENSG00000163376	KBTBD8	0.249109	1.56782e-35	6.80967e-31	0.131	0.057	kelch repeat and BTB domain containing 8 [Source:HGNC Symbol;Acc:HGNC:30691]	no_diff
ENSG00000088832	FKBP1A	0.299389	1.66127e-35	7.21557e-31	0.58	0.504	FKBP prolyl isomerase 1A [Source:HGNC Symbol;Acc:HGNC:3711]	up
ENSG00000154822	PLCL2	-0.168902	1.74644e-35	7.58549e-31	0.051	0.112	phospholipase C like 2 [Source:HGNC Symbol;Acc:HGNC:9064]	no_diff
ENSG00000165675	ENOX2	-0.214501	1.78197e-35	7.73983e-31	0.054	0.119	ecto-NOX disulfide-thiol exchanger 2 [Source:HGNC Symbol;Acc:HGNC:2259]	no_diff
ENSG00000105258	POLR2I	0.290452	1.92134e-35	8.34516e-31	0.237	0.14	RNA polymerase II subunit I [Source:HGNC Symbol;Acc:HGNC:9196]	up
ENSG00000279164	AL118508.2	0.12498	2.07481e-35	9.01174e-31	0.047	0.006	TEC	no_diff
ENSG00000099139	PCSK5	0.188943	2.3971e-35	1.04116e-30	0.075	0.021	proprotein convertase subtilisin/kexin type 5 [Source:HGNC Symbol;Acc:HGNC:8747]	no_diff
ENSG00000251022	THAP9-AS1	-0.2298	2.57654e-35	1.11909e-30	0.118	0.203	THAP9 antisense RNA 1 [Source:HGNC Symbol;Acc:HGNC:44172]	no_diff
ENSG00000157240	FZD1	-0.173421	2.60835e-35	1.13291e-30	0.039	0.096	frizzled class receptor 1 [Source:HGNC Symbol;Acc:HGNC:4038]	no_diff
ENSG00000188921	HACD4	-0.213547	2.84091e-35	1.23392e-30	0.082	0.16	3-hydroxyacyl-CoA dehydratase 4 [Source:HGNC Symbol;Acc:HGNC:20920]	no_diff
ENSG00000108671	PSMD11	0.295783	3.09729e-35	1.34528e-30	0.28	0.179	proteasome 26S subunit, non-ATPase 11 [Source:HGNC Symbol;Acc:HGNC:9556]	up
ENSG00000130005	GAMT	-0.143655	3.1618e-35	1.3733e-30	0.016	0.059	guanidinoacetate N-methyltransferase [Source:HGNC Symbol;Acc:HGNC:4136]	no_diff
ENSG00000179950	PUF60	0.277439	3.22154e-35	1.39924e-30	0.232	0.137	poly(U) binding splicing factor 60 [Source:HGNC Symbol;Acc:HGNC:17042]	up
ENSG00000173465	SSSCA1	0.229383	3.44131e-35	1.4947e-30	0.141	0.065	Sjogren syndrome/scleroderma autoantigen 1 [Source:HGNC Symbol;Acc:HGNC:11328]	no_diff
ENSG00000259820	AC083843.3	-0.184888	3.47545e-35	1.50953e-30	0.031	0.084	novel transcript	no_diff
ENSG00000138385	SSB	0.309341	3.52339e-35	1.53035e-30	0.428	0.346	Sjogren syndrome antigen B [Source:HGNC Symbol;Acc:HGNC:11316]	up
ENSG00000224596	ZMIZ1-AS1	0.129919	3.60827e-35	1.56722e-30	0.04	0.004	ZMIZ1 antisense RNA 1 [Source:HGNC Symbol;Acc:HGNC:27433]	no_diff
ENSG00000129003	VPS13C	-0.250458	4.20702e-35	1.82728e-30	0.343	0.458	vacuolar protein sorting 13 homolog C [Source:HGNC Symbol;Acc:HGNC:23594]	no_diff
ENSG00000250069	AC011379.1	-0.184913	4.29188e-35	1.86414e-30	0.024	0.071	novel transcript	no_diff
ENSG00000090470	PDCD7	-0.248309	4.31932e-35	1.87605e-30	0.125	0.211	programmed cell death 7 [Source:HGNC Symbol;Acc:HGNC:8767]	no_diff
ENSG00000241343	RPL36A	-0.295831	4.54871e-35	1.97569e-30	0.259	0.365	ribosomal protein L36a [Source:HGNC Symbol;Acc:HGNC:10359]	down
ENSG00000136235	GPNMB	-0.236285	4.66918e-35	2.02801e-30	0.217	0.317	glycoprotein nmb [Source:HGNC Symbol;Acc:HGNC:4462]	no_diff
ENSG00000100784	RPS6KA5	-0.169918	4.97351e-35	2.16019e-30	0.043	0.099	ribosomal protein S6 kinase A5 [Source:HGNC Symbol;Acc:HGNC:10434]	no_diff
ENSG00000136522	MRPL47	0.268447	4.98581e-35	2.16554e-30	0.217	0.125	mitochondrial ribosomal protein L47 [Source:HGNC Symbol;Acc:HGNC:16652]	up
ENSG00000120334	CENPL	-0.216298	5.10448e-35	2.21708e-30	0.026	0.071	centromere protein L [Source:HGNC Symbol;Acc:HGNC:17879]	no_diff
ENSG00000172354	GNB2	0.283042	5.20864e-35	2.26232e-30	0.572	0.502	G protein subunit beta 2 [Source:HGNC Symbol;Acc:HGNC:4398]	up
ENSG00000065978	YBX1	0.161374	5.38238e-35	2.33778e-30	0.854	0.875	Y-box binding protein 1 [Source:HGNC Symbol;Acc:HGNC:8014]	no_diff
ENSG00000083457	ITGAE	0.271336	5.72053e-35	2.48466e-30	0.184	0.102	integrin subunit alpha E [Source:HGNC Symbol;Acc:HGNC:6147]	up
ENSG00000171617	ENC1	0.275295	6.96208e-35	3.02391e-30	0.138	0.068	ectodermal-neural cortex 1 [Source:HGNC Symbol;Acc:HGNC:3345]	up
ENSG00000114331	ACAP2	-0.282314	7.19747e-35	3.12615e-30	0.352	0.465	ArfGAP with coiled-coil, ankyrin repeat and PH domains 2 [Source:HGNC Symbol;Acc:HGNC:16469]	down
ENSG00000012061	ERCC1	0.30026	7.20736e-35	3.13044e-30	0.311	0.223	ERCC excision repair 1, endonuclease non-catalytic subunit [Source:HGNC Symbol;Acc:HGNC:3433]	up
ENSG00000138678	GPAT3	0.244943	8.17272e-35	3.54974e-30	0.085	0.03	glycerol-3-phosphate acyltransferase 3 [Source:HGNC Symbol;Acc:HGNC:28157]	no_diff
ENSG00000184500	PROS1	-0.166757	8.29196e-35	3.60153e-30	0.026	0.075	protein S [Source:HGNC Symbol;Acc:HGNC:9456]	no_diff
ENSG00000088812	ATRN	-0.211289	9.03635e-35	3.92485e-30	0.076	0.146	attractin [Source:HGNC Symbol;Acc:HGNC:885]	no_diff
ENSG00000089737	DDX24	-0.295637	9.37017e-35	4.06984e-30	0.408	0.52	DEAD-box helicase 24 [Source:HGNC Symbol;Acc:HGNC:13266]	down
ENSG00000111775	COX6A1	0.300872	1.01898e-34	4.42584e-30	0.496	0.4	cytochrome c oxidase subunit 6A1 [Source:HGNC Symbol;Acc:HGNC:2277]	up
ENSG00000186188	FFAR4	-0.0970875	1.02682e-34	4.45988e-30	0.004	0.03	free fatty acid receptor 4 [Source:HGNC Symbol;Acc:HGNC:19061]	no_diff
ENSG00000104951	IL4I1	0.17106	1.03003e-34	4.47383e-30	0.061	0.014	interleukin 4 induced 1 [Source:HGNC Symbol;Acc:HGNC:19094]	no_diff
ENSG00000121749	TBC1D15	-0.227991	1.08851e-34	4.72781e-30	0.134	0.222	TBC1 domain family member 15 [Source:HGNC Symbol;Acc:HGNC:25694]	no_diff
ENSG00000173726	TOMM20	-0.295092	1.09367e-34	4.75027e-30	0.387	0.493	translocase of outer mitochondrial membrane 20 [Source:HGNC Symbol;Acc:HGNC:20947]	down
ENSG00000198876	DCAF12	-0.238627	1.1203e-34	4.86593e-30	0.124	0.207	DDB1 and CUL4 associated factor 12 [Source:HGNC Symbol;Acc:HGNC:19911]	no_diff
ENSG00000173812	EIF1	-0.200475	1.158e-34	5.02964e-30	0.949	0.968	eukaryotic translation initiation factor 1 [Source:HGNC Symbol;Acc:HGNC:3249]	no_diff
ENSG00000114439	BBX	-0.257873	1.23227e-34	5.35224e-30	0.182	0.282	BBX, HMG-box containing [Source:HGNC Symbol;Acc:HGNC:14422]	no_diff
ENSG00000115241	PPM1G	0.299952	1.23413e-34	5.36033e-30	0.312	0.208	protein phosphatase, Mg2+/Mn2+ dependent 1G [Source:HGNC Symbol;Acc:HGNC:9278]	up
ENSG00000234745	HLA-B	-0.186836	1.2782e-34	5.55172e-30	0.931	0.961	major histocompatibility complex, class I, B [Source:HGNC Symbol;Acc:HGNC:4932]	no_diff
ENSG00000109743	BST1	0.271279	1.42542e-34	6.19118e-30	0.177	0.094	bone marrow stromal cell antigen 1 [Source:HGNC Symbol;Acc:HGNC:1118]	up
ENSG00000119487	MAPKAP1	0.283277	1.43216e-34	6.22045e-30	0.252	0.158	mitogen-activated protein kinase associated protein 1 [Source:HGNC Symbol;Acc:HGNC:18752]	up
ENSG00000170291	ELP5	0.23371	1.455e-34	6.31963e-30	0.16	0.078	elongator acetyltransferase complex subunit 5 [Source:HGNC Symbol;Acc:HGNC:30617]	no_diff
ENSG00000168497	CAVIN2	-0.13744	1.50328e-34	6.52935e-30	0.007	0.038	caveolae associated protein 2 [Source:HGNC Symbol;Acc:HGNC:10690]	no_diff
ENSG00000240023	AL133163.1	0.126823	1.54372e-34	6.70499e-30	0.039	0.003	ribosomal protein, large, P0 (RPLP0) pseudogene	no_diff
ENSG00000187257	RSBN1L	-0.27957	1.65734e-34	7.1985e-30	0.159	0.254	round spermatid basic protein 1 like [Source:HGNC Symbol;Acc:HGNC:24765]	down
ENSG00000087076	HSD17B14	-0.112083	1.69943e-34	7.38129e-30	0.009	0.044	hydroxysteroid 17-beta dehydrogenase 14 [Source:HGNC Symbol;Acc:HGNC:23238]	no_diff
ENSG00000107864	CPEB3	-0.145925	1.84333e-34	8.00631e-30	0.031	0.082	cytoplasmic polyadenylation element binding protein 3 [Source:HGNC Symbol;Acc:HGNC:21746]	no_diff
ENSG00000162434	JAK1	0.252146	1.96521e-34	8.53569e-30	0.536	0.49	Janus kinase 1 [Source:HGNC Symbol;Acc:HGNC:6190]	no_diff
ENSG00000113552	GNPDA1	-0.2968	2.00574e-34	8.71174e-30	0.245	0.349	glucosamine-6-phosphate deaminase 1 [Source:HGNC Symbol;Acc:HGNC:4417]	down
ENSG00000186812	ZNF397	-0.200551	2.08098e-34	9.03851e-30	0.068	0.137	zinc finger protein 397 [Source:HGNC Symbol;Acc:HGNC:18818]	no_diff
ENSG00000072849	DERL2	0.266024	2.2377e-34	9.71924e-30	0.211	0.12	derlin 2 [Source:HGNC Symbol;Acc:HGNC:17943]	up
ENSG00000161203	AP2M1	0.300678	2.28672e-34	9.93215e-30	0.539	0.458	adaptor related protein complex 2 subunit mu 1 [Source:HGNC Symbol;Acc:HGNC:564]	up
ENSG00000118971	CCND2	-0.275251	2.30999e-34	1.00332e-29	0.092	0.164	cyclin D2 [Source:HGNC Symbol;Acc:HGNC:1583]	down
ENSG00000161640	SIGLEC11	-0.171434	2.94801e-34	1.28044e-29	0.025	0.071	sialic acid binding Ig like lectin 11 [Source:HGNC Symbol;Acc:HGNC:15622]	no_diff
ENSG00000105339	DENND3	-0.231795	2.98127e-34	1.29488e-29	0.098	0.179	DENN domain containing 3 [Source:HGNC Symbol;Acc:HGNC:29134]	no_diff
ENSG00000182389	CACNB4	-0.111896	3.30228e-34	1.43431e-29	0.004	0.032	calcium voltage-gated channel auxiliary subunit beta 4 [Source:HGNC Symbol;Acc:HGNC:1404]	no_diff
ENSG00000158050	DUSP2	-0.402292	3.30469e-34	1.43536e-29	0.304	0.394	dual specificity phosphatase 2 [Source:HGNC Symbol;Acc:HGNC:3068]	down
ENSG00000127084	FGD3	-0.164352	3.3881e-34	1.47159e-29	0.048	0.107	FYVE, RhoGEF and PH domain containing 3 [Source:HGNC Symbol;Acc:HGNC:16027]	no_diff
ENSG00000237605	AL591846.2	0.138316	3.45573e-34	1.50096e-29	0.047	0.007	novel transcript	no_diff
ENSG00000105185	PDCD5	0.308931	3.794e-34	1.64789e-29	0.334	0.233	programmed cell death 5 [Source:HGNC Symbol;Acc:HGNC:8764]	up
ENSG00000130311	DDA1	0.237051	3.79676e-34	1.64909e-29	0.174	0.09	DET1 and DDB1 associated 1 [Source:HGNC Symbol;Acc:HGNC:28360]	no_diff
ENSG00000154134	ROBO3	-0.117633	3.92082e-34	1.70297e-29	0.007	0.04	roundabout guidance receptor 3 [Source:HGNC Symbol;Acc:HGNC:13433]	no_diff
ENSG00000132465	JCHAIN	-0.114646	3.9244e-34	1.70453e-29	0.004	0.03	joining chain of multimeric IgA and IgM [Source:HGNC Symbol;Acc:HGNC:5713]	no_diff
ENSG00000158290	CUL4B	-0.200869	4.22539e-34	1.83526e-29	0.071	0.14	cullin 4B [Source:HGNC Symbol;Acc:HGNC:2555]	no_diff
ENSG00000107130	NCS1	0.102688	4.27876e-34	1.85844e-29	0.044	0.006	neuronal calcium sensor 1 [Source:HGNC Symbol;Acc:HGNC:3953]	no_diff
ENSG00000196396	PTPN1	0.309193	4.60373e-34	1.99958e-29	0.274	0.177	protein tyrosine phosphatase, non-receptor type 1 [Source:HGNC Symbol;Acc:HGNC:9642]	up
ENSG00000175711	B3GNTL1	0.188041	4.63574e-34	2.01349e-29	0.069	0.02	UDP-GlcNAc:betaGal beta-1,3-N-acetylglucosaminyltransferase like 1 [Source:HGNC Symbol;Acc:HGNC:21727]	no_diff
ENSG00000185112	FAM43A	-0.194795	4.69302e-34	2.03837e-29	0.04	0.097	family with sequence similarity 43 member A [Source:HGNC Symbol;Acc:HGNC:26888]	no_diff
ENSG00000163956	LRPAP1	0.299254	5.18132e-34	2.25045e-29	0.343	0.239	LDL receptor related protein associated protein 1 [Source:HGNC Symbol;Acc:HGNC:6701]	up
ENSG00000164649	CDCA7L	-0.153858	5.54424e-34	2.40809e-29	0.022	0.064	cell division cycle associated 7 like [Source:HGNC Symbol;Acc:HGNC:30777]	no_diff
ENSG00000171316	CHD7	-0.227526	5.65494e-34	2.45616e-29	0.083	0.158	chromodomain helicase DNA binding protein 7 [Source:HGNC Symbol;Acc:HGNC:20626]	no_diff
ENSG00000139668	WDFY2	-0.279129	5.93827e-34	2.57923e-29	0.163	0.258	WD repeat and FYVE domain containing 2 [Source:HGNC Symbol;Acc:HGNC:20482]	down
ENSG00000133943	DGLUCY	-0.189017	6.26291e-34	2.72023e-29	0.051	0.112	D-glutamate cyclase [Source:HGNC Symbol;Acc:HGNC:20498]	no_diff
ENSG00000123700	KCNJ2	-0.139916	6.78598e-34	2.94742e-29	0.025	0.07	potassium voltage-gated channel subfamily J member 2 [Source:HGNC Symbol;Acc:HGNC:6263]	no_diff
ENSG00000204138	PHACTR4	-0.276961	6.84638e-34	2.97365e-29	0.212	0.311	phosphatase and actin regulator 4 [Source:HGNC Symbol;Acc:HGNC:25793]	down
ENSG00000084733	RAB10	0.30316	7.50628e-34	3.26028e-29	0.463	0.374	RAB10, member RAS oncogene family [Source:HGNC Symbol;Acc:HGNC:9759]	up
ENSG00000197555	SIPA1L1	0.327786	7.5242e-34	3.26806e-29	0.201	0.13	signal induced proliferation associated 1 like 1 [Source:HGNC Symbol;Acc:HGNC:20284]	up
ENSG00000082397	EPB41L3	0.0330137	8.73182e-34	3.79258e-29	0.32	0.373	erythrocyte membrane protein band 4.1 like 3 [Source:HGNC Symbol;Acc:HGNC:3380]	no_diff
ENSG00000004468	CD38	-0.151723	8.81157e-34	3.82722e-29	0.026	0.075	CD38 molecule [Source:HGNC Symbol;Acc:HGNC:1667]	no_diff
ENSG00000015171	ZMYND11	-0.261053	9.62207e-34	4.17925e-29	0.092	0.162	zinc finger MYND-type containing 11 [Source:HGNC Symbol;Acc:HGNC:16966]	down
ENSG00000237550	RPL9P9	0.304031	9.91495e-34	4.30646e-29	0.376	0.273	ribosomal protein L9 pseudogene 9 [Source:HGNC Symbol;Acc:HGNC:17251]	up
ENSG00000247746	USP51	-0.155306	1.11173e-33	4.82869e-29	0.017	0.058	ubiquitin specific peptidase 51 [Source:HGNC Symbol;Acc:HGNC:23086]	no_diff
ENSG00000157873	TNFRSF14	-0.22077	1.15037e-33	4.99652e-29	0.161	0.253	TNF receptor superfamily member 14 [Source:HGNC Symbol;Acc:HGNC:11912]	no_diff
ENSG00000059377	TBXAS1	-0.274457	1.19748e-33	5.20113e-29	0.324	0.435	thromboxane A synthase 1 [Source:HGNC Symbol;Acc:HGNC:11609]	down
ENSG00000106261	ZKSCAN1	-0.27038	1.26538e-33	5.49604e-29	0.18	0.278	zinc finger with KRAB and SCAN domains 1 [Source:HGNC Symbol;Acc:HGNC:13101]	down
ENSG00000106460	TMEM106B	-0.207887	1.31392e-33	5.70688e-29	0.065	0.132	transmembrane protein 106B [Source:HGNC Symbol;Acc:HGNC:22407]	no_diff
ENSG00000198055	GRK6	0.271255	1.34968e-33	5.8622e-29	0.166	0.091	G protein-coupled receptor kinase 6 [Source:HGNC Symbol;Acc:HGNC:4545]	up
ENSG00000082781	ITGB5	-0.263858	1.50573e-33	6.54001e-29	0.144	0.234	integrin subunit beta 5 [Source:HGNC Symbol;Acc:HGNC:6160]	down
ENSG00000086730	LAT2	0.309786	1.51643e-33	6.58646e-29	0.287	0.204	linker for activation of T cells family member 2 [Source:HGNC Symbol;Acc:HGNC:12749]	up
ENSG00000178718	RPP25	-0.17583	1.53262e-33	6.65678e-29	0.03	0.078	ribonuclease P and MRP subunit p25 [Source:HGNC Symbol;Acc:HGNC:30361]	no_diff
ENSG00000081985	IL12RB2	-0.0969309	1.60533e-33	6.9726e-29	0.003	0.027	interleukin 12 receptor subunit beta 2 [Source:HGNC Symbol;Acc:HGNC:5972]	no_diff
ENSG00000188612	SUMO2	-0.271796	1.66773e-33	7.24363e-29	0.554	0.657	small ubiquitin-like modifier 2 [Source:HGNC Symbol;Acc:HGNC:11125]	down
ENSG00000007237	GAS7	-0.212478	1.75643e-33	7.62889e-29	0.314	0.425	growth arrest specific 7 [Source:HGNC Symbol;Acc:HGNC:4169]	no_diff
ENSG00000109534	GAR1	0.191647	1.78984e-33	7.77398e-29	0.106	0.041	GAR1 ribonucleoprotein [Source:HGNC Symbol;Acc:HGNC:14264]	no_diff
ENSG00000132475	H3F3B	0.190268	1.79514e-33	7.797e-29	0.913	0.91	H3 histone family member 3B [Source:HGNC Symbol;Acc:HGNC:4765]	no_diff
ENSG00000138592	USP8	-0.307725	1.7955e-33	7.79859e-29	0.398	0.502	ubiquitin specific peptidase 8 [Source:HGNC Symbol;Acc:HGNC:12631]	down
ENSG00000011454	RABGAP1	-0.23978	1.88806e-33	8.2006e-29	0.096	0.174	RAB GTPase activating protein 1 [Source:HGNC Symbol;Acc:HGNC:17155]	no_diff
ENSG00000142864	SERBP1	0.240714	2.18722e-33	9.49999e-29	0.564	0.529	SERPINE1 mRNA binding protein 1 [Source:HGNC Symbol;Acc:HGNC:17860]	no_diff
ENSG00000273727	RF00003	0.1554	2.28496e-33	9.9245e-29	0.036	0.003	NA	no_diff
ENSG00000108861	DUSP3	-0.275949	2.34913e-33	1.02032e-28	0.227	0.331	dual specificity phosphatase 3 [Source:HGNC Symbol;Acc:HGNC:3069]	down
ENSG00000130511	SSBP4	0.273207	2.35019e-33	1.02078e-28	0.21	0.121	single stranded DNA binding protein 4 [Source:HGNC Symbol;Acc:HGNC:15676]	up
ENSG00000211679	IGLC3	-0.244661	2.37196e-33	1.03024e-28	0.026	0.071	immunoglobulin lambda constant 3 (Kern-Oz+ marker) [Source:HGNC Symbol;Acc:HGNC:5857]	no_diff
ENSG00000167291	TBC1D16	-0.192506	2.46287e-33	1.06972e-28	0.062	0.129	TBC1 domain family member 16 [Source:HGNC Symbol;Acc:HGNC:28356]	no_diff
ENSG00000168306	ACOX2	0.0948185	2.50585e-33	1.08839e-28	0.036	0.003	acyl-CoA oxidase 2 [Source:HGNC Symbol;Acc:HGNC:120]	no_diff
ENSG00000225733	FGD5-AS1	-0.264404	2.67135e-33	1.16028e-28	0.226	0.324	FGD5 antisense RNA 1 [Source:HGNC Symbol;Acc:HGNC:40410]	down
ENSG00000136870	ZNF189	-0.147866	2.86145e-33	1.24284e-28	0.026	0.075	zinc finger protein 189 [Source:HGNC Symbol;Acc:HGNC:12980]	no_diff
ENSG00000123975	CKS2	-0.283012	2.95174e-33	1.28206e-28	0.18	0.271	CDC28 protein kinase regulatory subunit 2 [Source:HGNC Symbol;Acc:HGNC:2000]	down
ENSG00000153551	CMTM7	-0.254411	3.12115e-33	1.35564e-28	0.198	0.298	CKLF like MARVEL transmembrane domain containing 7 [Source:HGNC Symbol;Acc:HGNC:19178]	no_diff
ENSG00000170425	ADORA2B	0.121587	3.15271e-33	1.36935e-28	0.042	0.005	adenosine A2b receptor [Source:HGNC Symbol;Acc:HGNC:264]	no_diff
ENSG00000088930	XRN2	0.307775	3.71734e-33	1.61459e-28	0.441	0.349	5'-3' exoribonuclease 2 [Source:HGNC Symbol;Acc:HGNC:12836]	up
ENSG00000166295	ANAPC16	-0.285665	3.88809e-33	1.68875e-28	0.396	0.502	anaphase promoting complex subunit 16 [Source:HGNC Symbol;Acc:HGNC:26976]	down
ENSG00000134247	PTGFRN	-0.125929	3.92343e-33	1.7041e-28	0.012	0.049	prostaglandin F2 receptor inhibitor [Source:HGNC Symbol;Acc:HGNC:9601]	no_diff
ENSG00000100764	PSMC1	0.290123	3.93613e-33	1.70962e-28	0.282	0.184	proteasome 26S subunit, ATPase 1 [Source:HGNC Symbol;Acc:HGNC:9547]	up
ENSG00000179097	HTR1F	-0.062894	4.13878e-33	1.79764e-28	0	0.016	5-hydroxytryptamine receptor 1F [Source:HGNC Symbol;Acc:HGNC:5292]	no_diff
ENSG00000163463	KRTCAP2	0.275689	4.19952e-33	1.82402e-28	0.266	0.166	keratinocyte associated protein 2 [Source:HGNC Symbol;Acc:HGNC:28942]	up
ENSG00000181374	CCL13	-0.160301	4.27379e-33	1.85628e-28	0.003	0.025	C-C motif chemokine ligand 13 [Source:HGNC Symbol;Acc:HGNC:10611]	no_diff
ENSG00000174851	YIF1A	0.256326	4.35281e-33	1.8906e-28	0.214	0.123	Yip1 interacting factor homolog A, membrane trafficking protein [Source:HGNC Symbol;Acc:HGNC:16688]	no_diff
ENSG00000198265	HELZ	-0.270537	4.41141e-33	1.91605e-28	0.243	0.347	helicase with zinc finger [Source:HGNC Symbol;Acc:HGNC:16878]	down
ENSG00000172809	RPL38	-0.22177	4.48399e-33	1.94757e-28	0.883	0.911	ribosomal protein L38 [Source:HGNC Symbol;Acc:HGNC:10349]	no_diff
ENSG00000132122	SPATA6	-0.156722	4.96719e-33	2.15745e-28	0.027	0.075	spermatogenesis associated 6 [Source:HGNC Symbol;Acc:HGNC:18309]	no_diff
ENSG00000258757	AL133453.1	0.158188	5.12631e-33	2.22656e-28	0.064	0.016	novel transcript, antisense to ERO1L	no_diff
ENSG00000152484	USP12	0.299003	5.16623e-33	2.2439e-28	0.231	0.146	ubiquitin specific peptidase 12 [Source:HGNC Symbol;Acc:HGNC:20485]	up
ENSG00000102119	EMD	0.291848	5.17478e-33	2.24762e-28	0.26	0.165	emerin [Source:HGNC Symbol;Acc:HGNC:3331]	up
ENSG00000139508	SLC46A3	-0.152488	5.35931e-33	2.32776e-28	0.035	0.088	solute carrier family 46 member 3 [Source:HGNC Symbol;Acc:HGNC:27501]	no_diff
ENSG00000137965	IFI44	-0.222389	5.36319e-33	2.32945e-28	0.097	0.174	interferon induced protein 44 [Source:HGNC Symbol;Acc:HGNC:16938]	no_diff
ENSG00000176771	NCKAP5	-0.0787575	5.8731e-33	2.55092e-28	0.001	0.02	NCK associated protein 5 [Source:HGNC Symbol;Acc:HGNC:29847]	no_diff
ENSG00000160072	ATAD3B	0.180159	6.3953e-33	2.77773e-28	0.082	0.027	ATPase family, AAA domain containing 3B [Source:HGNC Symbol;Acc:HGNC:24007]	no_diff
ENSG00000177311	ZBTB38	-0.23289	7.09722e-33	3.08261e-28	0.138	0.222	zinc finger and BTB domain containing 38 [Source:HGNC Symbol;Acc:HGNC:26636]	no_diff
[truncated: 41,436 more rows]
