# Supplementary material for: Single-Cell RNA-Seq Analysis Reveals Macrophages Are Involved in the Pathogenesis of Human Sporadic Acute Type A Aortic Dissection
Source: Biomolecules. 2023 Feb 20;13(2):399. doi: 10.3390/biom13020399 (PMC9952989; doi:10.3390/biom13020399)
Supplement: Supplementary file 1 [file biomolecules-13-00399-s001.zip › Table S8.xlsx]

## Sheet: Sheet1
Table S8. Differentially expressed genes between macrophages in AD group and normal group.
Cluster	Macrophages_Control	Macrophages_AD	Sig
AL627309.1	0.00265845	0.00420353	NO_DIFF
AL627309.3	0	0.000276652	NO_DIFF
CICP27	0.00146986	0.00357809	NO_DIFF
AL627309.6	0.0135065	0.01963	NO_DIFF
AL627309.7	0	0.000339251	NO_DIFF
AL627309.5	0.027641	0.0297741	NO_DIFF
AL627309.4	0	0.000387141	NO_DIFF
WASH9P	0	0.00104876	NO_DIFF
AP006222.1	0.0185094	0.0512931	NO_DIFF
AL732372.1	0	0.000116404	NO_DIFF
AL732372.2	0.0183231	0.0257325	NO_DIFF
AL732372.3	0	0.000182953	NO_DIFF
AL669831.3	0.00468199	0.012774	NO_DIFF
MTND1P23	0.0628353	1.59906	DIFF
MTND2P28	0.175614	0.250535	NO_DIFF
MTCO1P12	0.0175115	0.0247869	NO_DIFF
AC114498.2	0.000797277	0.00565812	NO_DIFF
MTCO2P12	0.00467389	0.00484117	NO_DIFF
MTATP8P1	0.646013	0.0890579	DIFF
MTATP6P1	4.34668	7.56086	DIFF
MTCO3P12	0.0163468	0.0119077	NO_DIFF
AL669831.1	0.0188995	0.0142213	NO_DIFF
AL669831.2	0	0.000629038	NO_DIFF
AL669831.5	0.0311287	0.0112294	NO_DIFF
AL669831.4	0.0176271	0.00802099	NO_DIFF
FAM87B	0.014066	0.00812085	NO_DIFF
LINC01128	0.16025	0.142025	NO_DIFF
LINC00115	0.0131078	0.0231988	NO_DIFF
FAM41C	0.00503241	0.00435043	NO_DIFF
TUBB8P11	0	6.9299e-05	NO_DIFF
AL669831.6	0	0.000146986	NO_DIFF
AL645608.2	0	0.00372083	NO_DIFF
LINC02593	0.000779573	0.00170649	NO_DIFF
SAMD11	0.00326184	0.00554725	NO_DIFF
NOC2L	0.2248	0.417031	NO_DIFF
KLHL17	0.0314633	0.0283765	NO_DIFF
PLEKHN1	0.00946207	0.0451311	NO_DIFF
PERM1	0.000460758	0.00112367	NO_DIFF
AL645608.7	0.0754197	0.0341538	NO_DIFF
HES4	0.0921086	0.0825048	NO_DIFF
ISG15	0.52987	1.37276	DIFF
AL645608.3	0.00108043	0.000906279	NO_DIFF
AGRN	0.0335502	0.0334132	NO_DIFF
AL390719.1	0.0116333	0.0288365	NO_DIFF
AL645608.8	0	0.000275491	NO_DIFF
RNF223	0	0.000614394	NO_DIFF
C1orf159	0.0339903	0.0535118	NO_DIFF
AL390719.3	0	0.00213354	NO_DIFF
AL390719.2	0.00180693	0.00396314	NO_DIFF
TTLL10-AS1	0.000542709	0.000996268	NO_DIFF
TTLL10	0.0122242	0.00804486	NO_DIFF
TNFRSF18	0.0146597	0.0254899	NO_DIFF
TNFRSF4	0.00710823	0.0122464	NO_DIFF
SDF4	0.523845	1.05404	DIFF
B3GALT6	0.137396	0.214797	NO_DIFF
C1QTNF12	0.00517335	0.00365302	NO_DIFF
AL162741.1	0.00233228	0.00711333	NO_DIFF
UBE2J2	0.305072	0.462025	NO_DIFF
LINC01786	0.000668498	0.00056779	NO_DIFF
SCNN1D	0.0234052	0.00628516	NO_DIFF
ACAP3	0.235108	0.196116	NO_DIFF
PUSL1	0.0625124	0.0987427	NO_DIFF
INTS11	0.218702	0.379401	NO_DIFF
AL139287.1	0.000778381	6.78565e-05	NO_DIFF
CPTP	0.0587468	0.0759993	NO_DIFF
TAS1R3	0	0.00160575	NO_DIFF
DVL1	0.0812625	0.15351	NO_DIFF
MXRA8	0.0584885	0.0349367	NO_DIFF
AURKAIP1	1.07277	1.82868	DIFF
NDUFB4P8	0.00250449	0.00142031	NO_DIFF
CCNL2	0.508425	0.372397	NO_DIFF
MRPL20-AS1	0.0474561	0.0469481	NO_DIFF
MRPL20	0.885799	1.55058	DIFF
AL391244.2	0.0135146	0.0165259	NO_DIFF
ANKRD65	0.00757481	0.00169601	NO_DIFF
VWA1	0.0074593	0.022264	NO_DIFF
ATAD3C	0.00972886	0.0167363	NO_DIFF
ATAD3B	0.0638723	0.205376	NO_DIFF
AL645728.2	0.00134034	0.00438552	NO_DIFF
ATAD3A	0.0816142	0.193001	NO_DIFF
TMEM240	0.0087757	0.00456694	NO_DIFF
SSU72	1.10258	1.38098	NO_DIFF
AL645728.1	0.166031	0.167804	NO_DIFF
FNDC10	0.0491795	0.0621085	NO_DIFF
AL691432.2	0.0483694	0.0583658	NO_DIFF
MIB2	0.0950798	0.11772	NO_DIFF
MMP23B	0.00255408	0.00302678	NO_DIFF
CDK11B	0.241848	0.279518	NO_DIFF
FO704657.1	0.00996095	0.00835802	NO_DIFF
SLC35E2B	0.125344	0.0732252	NO_DIFF
AL691432.1	0.00960877	0.0144182	NO_DIFF
CDK11A	0.175825	0.198607	NO_DIFF
AL031282.2	0.0107626	0.0145386	NO_DIFF
AL031282.1	0.0144594	0.027822	NO_DIFF
SLC35E2A	0.0246035	0.0294624	NO_DIFF
NADK	0.455149	0.385627	NO_DIFF
GNB1	1.79127	2.37212	DIFF
AL109917.1	0.000686221	0.00290144	NO_DIFF
CALML6	0	0.000968806	NO_DIFF
TMEM52	0.00206868	0.00161451	NO_DIFF
CFAP74	0.00153651	0.00156758	NO_DIFF
AL391845.2	0	0.000236219	NO_DIFF
GABRD	0.00552033	0.00454722	NO_DIFF
PRKCZ	0.0134433	0.0298137	NO_DIFF
AL590822.2	0.0165057	0.0300113	NO_DIFF
PRKCZ-AS1	0.00368216	0.00437752	NO_DIFF
FAAP20	0.49507	0.768107	NO_DIFF
AL590822.1	0.00240178	0.000200673	NO_DIFF
SKI	0.439941	0.496802	NO_DIFF
MORN1	0.0113427	0.0171008	NO_DIFF
AL589739.1	0.000483975	0	NO_DIFF
AL513477.1	0	0.00178446	NO_DIFF
AL513477.2	0.00199248	0.00199313	NO_DIFF
RER1	0.780957	1.14427	DIFF
PEX10	0.0769599	0.109123	NO_DIFF
PLCH2	0.0019826	0.00259678	NO_DIFF
AL139246.1	0.000694332	0.000439372	NO_DIFF
PANK4	0.0367036	0.0317755	NO_DIFF
HES5	0.00349336	0.00597871	NO_DIFF
AL139246.5	0.119012	0.0821378	NO_DIFF
TNFRSF14-AS1	0.0780231	0.034868	NO_DIFF
TNFRSF14	0.714723	0.471416	NO_DIFF
AL139246.2	0.00330143	0.00161026	NO_DIFF
AL139246.3	0.0479241	0.0304013	NO_DIFF
PRXL2B	0.119958	0.071377	NO_DIFF
MMEL1	0.015421	0.00240574	NO_DIFF
AL831784.1	0	0.00130539	NO_DIFF
TTC34	0.0222584	0.0103641	NO_DIFF
LINC00982	0.00390509	0.00235224	NO_DIFF
PRDM16	0.00155289	0.00256216	NO_DIFF
AL512383.1	0.000751382	0.000111248	NO_DIFF
AL590438.1	0.00108696	0.000131492	NO_DIFF
ARHGEF16	0.0102991	0.000131492	NO_DIFF
MEGF6	0.0975657	0.0214337	NO_DIFF
AL513320.1	0.00525736	0.000266336	NO_DIFF
TPRG1L	0.27009	0.152395	NO_DIFF
WRAP73	0.109505	0.0990862	NO_DIFF
AL136528.1	0	0.000688344	NO_DIFF
TP73-AS1	0.0671144	0.0373569	NO_DIFF
CCDC27	0	0.000559767	NO_DIFF
SMIM1	0.0235908	0.0153782	NO_DIFF
LRRC47	0.191871	0.156256	NO_DIFF
RN7SL574P	0.00116111	0.000967043	NO_DIFF
AL365330.1	0.000606025	0	NO_DIFF
CEP104	0.223879	0.154865	NO_DIFF
DFFB	0.0304096	0.0250049	NO_DIFF
C1orf174	0.14404	0.137525	NO_DIFF
LINC01134	0.0115622	0.0067429	NO_DIFF
LINC01346	0.000750643	0.000214029	NO_DIFF
AL805961.2	0.00343654	0.0015076	NO_DIFF
EEF1DP6	0.000787817	0	NO_DIFF
AJAP1	0.00136113	0.000191805	NO_DIFF
NPHP4	0.0524243	0.028605	NO_DIFF
KCNAB2	0.653056	0.566569	NO_DIFF
CHD5	0.000319829	0.00327632	NO_DIFF
AL031847.2	0	0.000401676	NO_DIFF
RPL22	4.73856	3.26613	DIFF
AL031847.1	0	4.72682e-05	NO_DIFF
RNF207	0.00345101	0.00278636	NO_DIFF
ICMT	0.217298	0.177065	NO_DIFF
LINC00337	0.00220185	0.00188648	NO_DIFF
GPR153	0.00369945	0.0109489	NO_DIFF
ACOT7	0.0288521	0.0373705	NO_DIFF
AL031848.2	0.0101999	0.00680414	NO_DIFF
HES2	0.00206699	0.00314772	NO_DIFF
ESPN	0	0.000121073	NO_DIFF
AL031848.1	0	0.000298155	NO_DIFF
TNFRSF25	0.132091	0.0151029	NO_DIFF
PLEKHG5	0.148249	0.00413977	NO_DIFF
NOL9	0.166769	0.205439	NO_DIFF
AL591866.1	0	0.00105049	NO_DIFF
TAS1R1	0.000835528	0.0011663	NO_DIFF
ZBTB48	0.139582	0.193538	NO_DIFF
KLHL21	0.197284	0.137413	NO_DIFF
PHF13	0.113383	0.10488	NO_DIFF
THAP3	0.09426	0.0662431	NO_DIFF
DNAJC11	0.101719	0.158882	NO_DIFF
LINC01672	0.00602981	0.0035169	NO_DIFF
AL591163.1	0.006226	0.00333184	NO_DIFF
CAMTA1-DT	0.0105023	0.00452826	NO_DIFF
CAMTA1	0.800883	0.682732	NO_DIFF
AL359881.3	0.000832604	0.000536518	NO_DIFF
AL359881.2	0.00389517	0.000436741	NO_DIFF
AL359881.1	0.00222313	0.000668559	NO_DIFF
VAMP3	0.809243	0.678046	NO_DIFF
Z98884.2	0.00699605	0.00768982	NO_DIFF
PER3	0.175055	0.041966	NO_DIFF
Z98884.1	0.00177746	0.00511105	NO_DIFF
UTS2	0.0799599	0.0261711	NO_DIFF
TNFRSF9	0.0125835	0.0360596	NO_DIFF
AL009183.1	0	0.000133381	NO_DIFF
PARK7	1.29142	2.28685	DIFF
AL034417.4	0.00392658	0.0080071	NO_DIFF
AL034417.3	0.0289304	0.00995506	NO_DIFF
ERRFI1	0.142724	0.239848	NO_DIFF
AL034417.2	0.000533794	0.00420249	NO_DIFF
LINC01714	0	0.00015924	NO_DIFF
AL358876.2	0	0.00227833	NO_DIFF
RNU6-991P	0	0.000108806	NO_DIFF
SLC45A1	0.00214617	0.00216357	NO_DIFF
RERE	0.714429	0.381043	DIFF
RERE-AS1	0.00408338	0.000914944	NO_DIFF
RF00599	0.00180039	0.000239224	NO_DIFF
RPL7P11	0.00334542	0.000403096	NO_DIFF
RPL7P7	0.024663	0.0284549	NO_DIFF
RF00019.2	0	0.00102238	NO_DIFF
AL357552.1	0	0.000664092	NO_DIFF
AL357552.2	0.00226355	0.000538068	NO_DIFF
ENO1	2.42845	9.36061	DIFF
ENO1-AS1	0.0117778	0.0198448	NO_DIFF
HMGN2P17	0	0.000229997	NO_DIFF
CA6	0.000660404	0.000723689	NO_DIFF
SLC2A5	0.107899	0.0566216	NO_DIFF
GPR157	0.042024	0.0508926	NO_DIFF
MIR34AHG	0.0489124	0.0218563	NO_DIFF
LNCTAM34A	0.0161478	0.00740789	NO_DIFF
H6PD	0.269707	0.216713	NO_DIFF
SPSB1	0.0259321	0.0869603	NO_DIFF
BX323043.1	0	0.000906422	NO_DIFF
LINC02606	0.00165367	0.00147277	NO_DIFF
SLC25A33	0.271184	0.22428	NO_DIFF
AL954705.1	0.00805391	0.00483131	NO_DIFF
TMEM201	0.0298822	0.0373779	NO_DIFF
PIK3CD	0.238845	0.227901	NO_DIFF
PIK3CD-AS1	0.00389794	0.00306272	NO_DIFF
AL691449.1	0.00111759	0	NO_DIFF
PIK3CD-AS2	0.00663741	0.0133241	NO_DIFF
CLSTN1	0.280648	0.356952	NO_DIFF
AL357140.3	0.001414	0.00117995	NO_DIFF
CTNNBIP1	0.186431	0.212319	NO_DIFF
AL357140.1	0	0.000105534	NO_DIFF
AL357140.4	0.00140829	0	NO_DIFF
LZIC	0.43988	0.532085	NO_DIFF
AL357140.2	0.0017012	0.00220574	NO_DIFF
NMNAT1	0.138444	0.0744735	NO_DIFF
RN7SKP269	0.000624871	0.000903231	NO_DIFF
RBP7	1.36297	0.630791	DIFF
UBE4B	0.208352	0.238668	NO_DIFF
PGAM1P11	0	0.000203909	NO_DIFF
RNU6-828P	0	0.000185358	NO_DIFF
KIF1B	0.926313	1.03081	NO_DIFF
AL139424.3	0.00686352	0.00619889	NO_DIFF
AL139424.2	0.0103014	0.00942526	NO_DIFF
PGD	0.900272	1.42864	DIFF
AL139424.1	0	0.000288884	NO_DIFF
CENPS-CORT	0	0.00112359	NO_DIFF
CENPS	0.00758698	0.0201616	NO_DIFF
CORT	0	0.000119301	NO_DIFF
DFFA	0.257491	0.257639	NO_DIFF
AL354956.1	0	0.000533735	NO_DIFF
PEX14	0.0639414	0.0678466	NO_DIFF
CASZ1	0.0273948	0.0535475	NO_DIFF
AL139423.1	0.000947816	0.00103651	NO_DIFF
C1orf127	0.0163719	0.0042615	NO_DIFF
CFL1P6	0	9.58521e-05	NO_DIFF
TARDBP	0.463524	0.467592	NO_DIFF
AL109811.3	0.000679201	8.91745e-05	NO_DIFF
MASP2	0.00162969	0.00175707	NO_DIFF
AL109811.2	0.00253935	0.00391123	NO_DIFF
SRM	0.389838	0.957239	DIFF
EXOSC10	0.208003	0.188856	NO_DIFF
AL109811.1	0.00107922	0.000573219	NO_DIFF
EXOSC10-AS1	0.00488308	0.00455753	NO_DIFF
MTOR	0.150274	0.140205	NO_DIFF
ANGPTL7	0.00301561	0.0079237	NO_DIFF
UBIAD1	0.114589	0.101119	NO_DIFF
LINC01647	0	0.00111684	NO_DIFF
AL031731.1	0	0.00108819	NO_DIFF
FBXO2	0.00868771	0.0036824	NO_DIFF
FBXO44	0.0571662	0.0205971	NO_DIFF
FBXO6	0.0658832	0.0665858	NO_DIFF
MAD2L2	0.129579	0.21645	NO_DIFF
DRAXIN	0.00884345	0.00971407	NO_DIFF
AGTRAP	0.741959	0.967272	NO_DIFF
C1orf167	0.0147014	0.0185946	NO_DIFF
AL953897.1	0.00131638	0.000935234	NO_DIFF
MTHFR	0.904931	0.359093	DIFF
CLCN6	0.219722	0.134857	NO_DIFF
NPPA	0	0.000133241	NO_DIFF
AL021155.1	0	5.70786e-05	NO_DIFF
AL021155.2	0.0412934	0.0226104	NO_DIFF
RNU5E-4P	0.00217603	0.0223129	NO_DIFF
KIAA2013	0.455391	0.425104	NO_DIFF
PLOD1	0.194777	0.312407	NO_DIFF
MFN2	0.33161	0.323399	NO_DIFF
AL096840.1	0	0.00017301	NO_DIFF
MIIP	0.20002	0.25713	NO_DIFF
RF00019.3	0	5.74497e-05	NO_DIFF
RN7SL649P	0	0.000223957	NO_DIFF
TNFRSF8	0.0231439	0.029815	NO_DIFF
RPL23AP89	0	3.68481e-05	NO_DIFF
AL357835.1	0.00182897	0.000466103	NO_DIFF
MIR7846	0	0.000319824	NO_DIFF
TNFRSF1B	3.00532	2.62835	NO_DIFF
RPL10P17	0	9.47623e-05	NO_DIFF
VPS13D	0.376246	0.409511	NO_DIFF
AC243836.1	0	0.000261763	NO_DIFF
DHRS3	0.451355	0.572691	NO_DIFF
RNU6ATAC18P	0	0.00038541	NO_DIFF
AC254633.1	0	0.00501879	NO_DIFF
AADACL4	0	0.00201634	NO_DIFF
C1orf158	0	0.000435182	NO_DIFF
HNRNPCL1	0	0.000260617	NO_DIFF
LRRC38	0	5.62858e-05	NO_DIFF
PDPN	0.0411616	0.046242	NO_DIFF
PRDM2	0.953943	0.773327	NO_DIFF
KAZN	0.00867233	0.00994393	NO_DIFF
AL357873.1	0	4.3295e-05	NO_DIFF
TMEM51-AS1	0.0131438	0.0071728	NO_DIFF
TMEM51	0.179976	0.252183	NO_DIFF
C1orf195	0	7.15153e-05	NO_DIFF
AL035405.1	0	0.00135811	NO_DIFF
AL391094.1	0.00114097	0.00340612	NO_DIFF
FHAD1	0.0125439	0.093918	NO_DIFF
AL031283.2	0.00143129	0.000759194	NO_DIFF
AL031283.1	0.00730207	0.020936	NO_DIFF
EFHD2	1.68425	5.27201	DIFF
CTRC	0.0206017	0.0869975	NO_DIFF
CELA2A	0.0175736	0.064134	NO_DIFF
CELA2B	0	0.00198823	NO_DIFF
CASP9	0.10462	0.136032	NO_DIFF
DNAJC16	0.157634	0.118214	NO_DIFF
SCARNA21B	0	6.4226e-05	NO_DIFF
AL121992.3	0	0.000485546	NO_DIFF
AGMAT	0.00661976	0.00782877	NO_DIFF
AL121992.1	0.00416486	0.00518373	NO_DIFF
CHCHD2P6	0.000299683	0.000683163	NO_DIFF
CD24P1	0	0.000146957	NO_DIFF
DDI2	0.329675	0.250348	NO_DIFF
AL121992.2	0.00548573	0.0139756	NO_DIFF
PLEKHM2	0.798833	0.722649	NO_DIFF
AL450998.3	0	0.00103643	NO_DIFF
SLC25A34	0.0211226	0.0395543	NO_DIFF
SLC25A34-AS1	0.000568149	0.00187382	NO_DIFF
TMEM82	0.000673213	0.00257396	NO_DIFF
FBLIM1	0.0568612	0.0917603	NO_DIFF
RPL12P14	0.000636327	0.014522	NO_DIFF
UQCRHL	0.098556	0.0601278	NO_DIFF
AL450998.1	0.000499324	0.00311062	NO_DIFF
AL450998.2	0.46027	0.24046	NO_DIFF
SPEN	1.25622	1.06725	NO_DIFF
AL034555.1	0	0.00041516	NO_DIFF
ZBTB17	0.0870802	0.1396	NO_DIFF
AL355994.4	0.0160654	0.0310537	NO_DIFF
AL355994.1	0.00059286	0.00184843	NO_DIFF
AL355994.5	0	0.000115962	NO_DIFF
TBC1D3P6	0	0.000132394	NO_DIFF
SRARP	0.00105018	0.00626601	NO_DIFF
HSPB7	0.0198864	0.00688172	NO_DIFF
CLCNKA	0	0.000695375	NO_DIFF
CLCNKB	0	0.00026798	NO_DIFF
FAM131C	0.00147595	0.000428423	NO_DIFF
EPHA2	0.0150938	0.0181034	NO_DIFF
AL451042.1	0	0.000351611	NO_DIFF
ARHGEF19	0.025162	0.023959	NO_DIFF
ANO7L1	0	0.000951207	NO_DIFF
CPLANE2	0.00748006	0.00516693	NO_DIFF
MT1XP1	0.015885	0.019971	NO_DIFF
FBXO42	0.232455	0.169454	NO_DIFF
SZRD1	0.541657	0.83383	NO_DIFF
RPL22P3	0.000191305	0.000458828	NO_DIFF
SPATA21	0.00198431	0.00399189	NO_DIFF
NECAP2	0.840221	0.540721	NO_DIFF
LINC01772	0.0812374	0.0205715	NO_DIFF
CROCCP3	0.0148564	0.00788022	NO_DIFF
AL137802.2	0.00178803	0.00663085	NO_DIFF
AL137802.3	0	0.00146623	NO_DIFF
LINC01783	0.00120294	0	NO_DIFF
NBPF1	0.421076	0.14787	DIFF
AL137798.1	0.000487529	0.000394758	NO_DIFF
CROCCP2	0.0940673	0.0766997	NO_DIFF
MST1P2	0.00791127	0.00134962	NO_DIFF
EIF1AXP1	0.00111122	0.00579974	NO_DIFF
CROCC	0.0550632	0.0297064	NO_DIFF
CROCCP4	0.0033739	0.000615592	NO_DIFF
MST1L	0.00279465	0.000737525	NO_DIFF
BX284668.5	0.246235	0.105736	NO_DIFF
BX284668.6	0.0470632	0.0317451	NO_DIFF
MFAP2	0.0103655	0.00983584	NO_DIFF
ATP13A2	0.196256	0.182696	NO_DIFF
SDHB	0.505943	0.498605	NO_DIFF
PADI2	0.00581011	0.0185521	NO_DIFF
PADI1	0	0.000203966	NO_DIFF
PADI4	0.00463449	0.0551839	NO_DIFF
PADI6	0	0.000230214	NO_DIFF
RCC2	0.411933	0.481322	NO_DIFF
RCC2-AS1	0	6.75129e-05	NO_DIFF
ARHGEF10L	0.348888	0.139163	NO_DIFF
AL136529.1	0	0.000632942	NO_DIFF
IGSF21	0.416566	0.0114023	DIFF
AL365209.1	0.247325	0.00168016	NO_DIFF
AL591896.1	0.000802303	0	NO_DIFF
PAX7	0	0.000368944	NO_DIFF
AL080251.1	0	0.000259357	NO_DIFF
ALDH4A1	0.0509538	0.032259	NO_DIFF
IFFO2	0.100454	0.129321	NO_DIFF
AL137127.1	0.00486651	0.00674349	NO_DIFF
UBR4	0.322506	0.315584	NO_DIFF
EMC1-AS1	0.0360768	0.0187622	NO_DIFF
EMC1	0.137376	0.230509	NO_DIFF
MRTO4	0.177007	0.418426	DIFF
AKR7L	0.00286964	0.0117563	NO_DIFF
AKR7A3	0.00327596	0.00148198	NO_DIFF
AL035413.1	0.00029352	0.00242056	NO_DIFF
AKR7A2	0.258145	0.245524	NO_DIFF
RNU6-1099P	0.00355628	0.00410229	NO_DIFF
PQLC2	0.0972829	0.152278	NO_DIFF
CAPZB	3.26878	3.63334	NO_DIFF
MICOS10	0.629295	1.11158	DIFF
AL031727.2	0	0.000259694	NO_DIFF
NBL1	0.145756	0.0509129	NO_DIFF
AL031727.1	0.056552	0.043474	NO_DIFF
TMCO4	0.0828039	0.044039	NO_DIFF
OTUD3	0.0340681	0.0405534	NO_DIFF
PLA2G2A	0.816228	0.348808	DIFF
PLA2G5	0.0100962	0.00206119	NO_DIFF
PLA2G2D	0.000937815	0.00111179	NO_DIFF
Z98257.1	0.00724017	0.00627884	NO_DIFF
PLA2G2C	0.00161199	0.00260933	NO_DIFF
UBXN10-AS1	0.00356555	0.00805136	NO_DIFF
UBXN10	0.00326649	0.00293932	NO_DIFF
CAMK2N1	0.0322819	0.00840115	NO_DIFF
MUL1	0.103266	0.076735	NO_DIFF
FAM43B	0.00227653	0.000189378	NO_DIFF
CDA	0.0956307	0.354902	DIFF
PINK1	0.282043	0.194655	NO_DIFF
PINK1-AS	0.00924902	0.0132526	NO_DIFF
DDOST	0.394154	0.608229	NO_DIFF
KIF17	0.0255411	0.00498552	NO_DIFF
AL663074.2	0	0.000930382	NO_DIFF
SH2D5	0.00217204	0.00164	NO_DIFF
HP1BP3	1.35526	1.25519	NO_DIFF
EIF4G3	1.01334	1.05474	NO_DIFF
RPS15AP6	0.0142174	0.00937067	NO_DIFF
HSPE1P27	0	0.00110376	NO_DIFF
ECE1	0.0540014	0.316934	DIFF
AL031005.1	0	0.00210578	NO_DIFF
AL031728.1	0	0.000401398	NO_DIFF
NBPF2P	0.000143688	0.00217091	NO_DIFF
HS6ST1P1	0	0.000337845	NO_DIFF
NBPF3	0.0159144	0.0114523	NO_DIFF
ALPL	0.0262534	0.00287428	NO_DIFF
RAP1GAP	0	0.000813835	NO_DIFF
USP48	0.416773	0.467141	NO_DIFF
LDLRAD2	0	0.00122964	NO_DIFF
HSPG2	0.0952016	0.117143	NO_DIFF
AL590556.1	0.000432814	0.000896651	NO_DIFF
LINC01635	0.0012856	0.00525129	NO_DIFF
LINC00339	0.104356	0.0797222	NO_DIFF
CDC42	3.65235	5.0463	DIFF
AL031281.2	0.0134169	0.0122735	NO_DIFF
CDC42-IT1	0.0708332	0.0469295	NO_DIFF
AL031281.1	0	0.000126896	NO_DIFF
WNT4	0	0.000825467	NO_DIFF
AL445253.1	0	0.00109717	NO_DIFF
ZBTB40	0.19255	0.1229	NO_DIFF
EPHA8	0	0.00162326	NO_DIFF
C1QA	39.861	2.82555	DIFF
C1QC	13.464	1.21906	DIFF
C1QB	30.1791	3.03541	DIFF
EPHB2	0.126355	0.0697915	NO_DIFF
KDM1A	0.211893	0.247348	NO_DIFF
LUZP1	0.933431	0.507576	DIFF
AL161672.1	0	0.000146957	NO_DIFF
RNU6-514P	0	0.00102726	NO_DIFF
AL109936.1	0	0.000130765	NO_DIFF
LINC01355	0.0276511	0.0105734	NO_DIFF
AL109936.6	0.00285352	0.00250687	NO_DIFF
HNRNPR	0.914275	1.34245	DIFF
ZNF436	0.0520752	0.0214689	NO_DIFF
ZNF436-AS1	0.0141081	0.00869377	NO_DIFF
AL109936.2	0	0.000379638	NO_DIFF
TCEA3	0.00777041	0.00355089	NO_DIFF
ASAP3	0.00593487	0.00247465	NO_DIFF
E2F2	0.00390786	0.00474045	NO_DIFF
AL021154.1	0	0.000143506	NO_DIFF
ID3	0.496313	0.271425	NO_DIFF
AL450043.1	0	0.000252184	NO_DIFF
MDS2	0	0.000456872	NO_DIFF
RPL11	19.5922	16.0516	DIFF
ELOA	0.392792	0.40063	NO_DIFF
ELOA-AS1	0.0263609	0.0190845	NO_DIFF
PITHD1	0.524714	0.520296	NO_DIFF
LYPLA2	0.291529	0.426984	NO_DIFF
GALE	0.0862139	0.162528	NO_DIFF
HMGCL	0.232784	0.186888	NO_DIFF
FUCA1	1.32641	0.254108	DIFF
CNR2	0.000718506	0.00221758	NO_DIFF
BTBD6P1	0	0.000158758	NO_DIFF
AL590609.2	0.00310379	0.0020604	NO_DIFF
PNRC2	1.38722	1.04005	NO_DIFF
SRSF10	0.754869	0.926168	NO_DIFF
AL590609.1	0	9.6053e-05	NO_DIFF
MYOM3	0.00175639	0.000810283	NO_DIFF
IL22RA1	0.000685143	0.000237943	NO_DIFF
IFNLR1	0.0106361	0.00724353	NO_DIFF
AL590683.1	0	0.000131397	NO_DIFF
GRHL3	0	0.000249561	NO_DIFF
STPG1	0.0192119	0.0214713	NO_DIFF
NIPAL3	0.0640248	0.0425382	NO_DIFF
RCAN3AS	0.00221122	0.00226143	NO_DIFF
RCAN3	0.119426	0.154407	NO_DIFF
AL445686.2	0.00397582	0.00619362	NO_DIFF
NCMAP	0	0.000773747	NO_DIFF
AL445686.1	0.00128713	0	NO_DIFF
RF00019.5	0.000495437	0	NO_DIFF
SRRM1	1.71796	1.63822	NO_DIFF
CLIC4	0.445655	0.396938	NO_DIFF
RUNX3	0.298493	0.253744	NO_DIFF
MIR6731	0	0.000129541	NO_DIFF
AL445471.1	0	0.000158772	NO_DIFF
AL445471.2	0	8.90662e-05	NO_DIFF
AL050344.2	0.000471499	0.000382888	NO_DIFF
AL050344.1	0	0.000119749	NO_DIFF
AL031432.1	0.00227395	0.0019927	NO_DIFF
SYF2	1.48057	1.23994	NO_DIFF
AL031432.4	0.0374194	0.0349821	NO_DIFF
AL031432.5	0.000866242	0.000868533	NO_DIFF
RSRP1	2.99157	1.55964	DIFF
AL031432.3	0.0110567	0.00987623	NO_DIFF
AL031432.2	0.000597373	0.00108023	NO_DIFF
RHD	0.00131179	0.00489738	NO_DIFF
TMEM50A	1.30398	1.66648	NO_DIFF
RHCE	0.000868802	0.00161359	NO_DIFF
MACO1	0.310963	0.255789	NO_DIFF
LDLRAP1	0.0524758	0.081791	NO_DIFF
AL606491.1	0.00648221	0.000371312	NO_DIFF
MAN1C1	0.167078	0.0527755	NO_DIFF
AL031280.1	0.00576671	0.0177692	NO_DIFF
SELENON	0.286182	0.259329	NO_DIFF
AL020996.1	0.00840942	0.00390477	NO_DIFF
MTFR1L	0.208963	0.163486	NO_DIFF
AUNIP	0.00288218	0.00175891	NO_DIFF
AL033528.2	0.00453117	0.00572613	NO_DIFF
PAQR7	0.170953	0.0181079	NO_DIFF
STMN1	0.407868	0.22429	NO_DIFF
SNRPFP2	0	0.000110494	NO_DIFF
MIR3917	0	6.78879e-05	NO_DIFF
PAFAH2	0.131486	0.0906452	NO_DIFF
EXTL1	0.000605665	0.00168984	NO_DIFF
SLC30A2	0.00115534	0.00232942	NO_DIFF
AL391650.2	0	0.000593126	NO_DIFF
TRIM63	0.00286795	0	NO_DIFF
PDIK1L	0.0733928	0.0327298	NO_DIFF
FAM110D	0.0093207	0.00415344	NO_DIFF
C1orf232	0	0.000241508	NO_DIFF
AL391650.1	0	0.000749854	NO_DIFF
ZNF593	0.260666	0.545362	DIFF
CNKSR1	0.0162782	0.0103847	NO_DIFF
CATSPER4	0	0.00130743	NO_DIFF
AL355877.1	0.00228587	0.00304501	NO_DIFF
AL355877.3	0	0.000429175	NO_DIFF
CEP85	0.0593294	0.0658385	NO_DIFF
AL355877.2	0.000526343	0.00163167	NO_DIFF
SH3BGRL3	11.8571	38.5685	DIFF
UBXN11	0.261768	0.515363	DIFF
CD52	0.291425	3.63842	DIFF
CRYBG2	0.000428743	0.000898376	NO_DIFF
AL451139.1	0	0.00063895	NO_DIFF
ZNF683	0.00136478	0.00036293	NO_DIFF
LIN28A	0	0.00090015	NO_DIFF
DHDDS	0.255331	0.200133	NO_DIFF
AL513365.1	0.0504315	0.0360602	NO_DIFF
AL513365.2	0	0.000442934	NO_DIFF
HMGN2	1.92785	1.70588	NO_DIFF
DPPA2P2	0	0.00167665	NO_DIFF
RPS6KA1	0.434788	0.719773	DIFF
RN7SL679P	0.000524805	0.00266017	NO_DIFF
AL512408.1	0.00426211	0.00655049	NO_DIFF
ARID1A	1.2264	1.00965	NO_DIFF
PIGV	0.0627952	0.0537766	NO_DIFF
RN7SL165P	0.0014244	0.00306676	NO_DIFF
ZDHHC18	0.100383	0.100929	NO_DIFF
SFN	0.000660118	0.00206041	NO_DIFF
GPN2	0.163646	0.146332	NO_DIFF
AL034380.1	0	9.6852e-05	NO_DIFF
GPATCH3	0.0741038	0.117692	NO_DIFF
NUDC	0.781487	0.919814	NO_DIFF
NR0B2	0	9.04725e-05	NO_DIFF
KDF1	0.00119172	0.000270648	NO_DIFF
RPL12P13	0.0082983	0.00180558	NO_DIFF
AL356390.1	0.00836015	0.00201322	NO_DIFF
OSTCP2	0.00132511	0.00039391	NO_DIFF
TRNP1	0.00522961	0.0186975	NO_DIFF
TENT5B	0.00513864	0.00444267	NO_DIFF
SLC9A1	0.193118	0.174129	NO_DIFF
CHCHD3P3	0	0.000548804	NO_DIFF
NPM1P39	0.00184364	0.00260619	NO_DIFF
WDTC1	0.200519	0.154932	NO_DIFF
FO393419.3	0.0011647	0.00236227	NO_DIFF
TMEM222	0.150057	0.191082	NO_DIFF
ACTG1P20	0.00115758	0.000794505	NO_DIFF
SYTL1	0.0144948	0.0314382	NO_DIFF
MAP3K6	0.110807	0.0602345	NO_DIFF
FCN3	0.00287673	0.00211287	NO_DIFF
CD164L2	0.00232098	0.000914659	NO_DIFF
GPR3	0	0.00446445	NO_DIFF
WASF2	3.41259	1.51326	DIFF
BX293535.1	0.00275803	0.000151667	NO_DIFF
AHDC1	0.230747	0.20169	NO_DIFF
FGR	0.94792	1.52744	DIFF
AL031729.1	0.00191062	0.00662662	NO_DIFF
LINC02574	0.00016571	0.00240267	NO_DIFF
IFI6	0.398406	0.918053	DIFF
AL445490.1	0.000536136	0.00271463	NO_DIFF
FAM76A	0.2061	0.142914	NO_DIFF
AL020997.1	0.00336026	0.00306271	NO_DIFF
RPEP3	0.00089309	0.000335246	NO_DIFF
STX12	0.9164	0.710905	NO_DIFF
AL020997.2	0.0128779	0.00653387	NO_DIFF
AL020997.3	0.00302268	0.00617346	NO_DIFF
RNU6-1245P	0	7.25193e-05	NO_DIFF
PPP1R8	0.151942	0.131657	NO_DIFF
SCARNA1	0	0.000950045	NO_DIFF
THEMIS2	1.15819	1.08342	NO_DIFF
RPA2	0.225617	0.291713	NO_DIFF
SMPDL3B	0.00881698	0.00373518	NO_DIFF
XKR8	0.0474754	0.0366791	NO_DIFF
EYA3	0.132351	0.171023	NO_DIFF
AL512288.2	0.00135991	0.000493896	NO_DIFF
RN7SL559P	0.0186406	0.0166659	NO_DIFF
SPCS2P4	0.00437723	0.00955224	NO_DIFF
AL137792.2	0	0.000118549	NO_DIFF
AL137792.1	0.00113565	0.00103655	NO_DIFF
RNU6-176P	0	0.000298276	NO_DIFF
PTAFR	0.84963	1.15955	NO_DIFF
DNAJC8	1.12495	1.375	NO_DIFF
ATP5IF1	1.19764	1.31359	NO_DIFF
AL353622.1	0.0265445	0.0106724	NO_DIFF
AL353622.2	0.00133828	0.000986182	NO_DIFF
SESN2	0.341627	0.365751	NO_DIFF
MED18	0.0691021	0.0745367	NO_DIFF
PHACTR4	0.976796	0.631505	DIFF
CR391992.1	0.00739454	0.00543905	NO_DIFF
RNU6ATAC27P	0.000225865	0.000866333	NO_DIFF
RCC1	0.194063	0.175922	NO_DIFF
SNHG3	0.260021	0.388694	NO_DIFF
SNORA73B	0.000661548	0	NO_DIFF
PRDX3P2	0.000370991	0	NO_DIFF
AL513497.1	0.0302302	0.0166891	NO_DIFF
TRNAU1AP	0.333331	0.275945	NO_DIFF
SNHG12	0.758604	0.536743	NO_DIFF
SNORD99	0.00100473	0.000671492	NO_DIFF
TAF12	0.259387	0.273483	NO_DIFF
RAB42	0.12046	0.0968052	NO_DIFF
LINC01715	0.00487719	0.00333453	NO_DIFF
RNU11	0	0.00330323	NO_DIFF
GMEB1	0.29211	0.258297	NO_DIFF
YTHDF2	0.724968	0.583517	NO_DIFF
OPRD1	0.00210781	0.000526183	NO_DIFF
AL009181.1	0.00156558	0.0003376	NO_DIFF
EPB41	0.283404	0.210861	NO_DIFF
AL138785.1	0	0.00043272	NO_DIFF
RF00017	0.00191339	0.000500277	NO_DIFF
TMEM200B	0.00496308	0.00708029	NO_DIFF
AL357500.1	0.000486055	0.000585179	NO_DIFF
SRSF4	0.936158	0.859137	NO_DIFF
MECR	0.0518471	0.0647046	NO_DIFF
PTPRU	0.00313301	0.00207064	NO_DIFF
AC092265.1	0	0.000168225	NO_DIFF
MATN1	0.00702938	0.0132218	NO_DIFF
MATN1-AS1	0.0417216	0.0166666	NO_DIFF
LAPTM5	9.67882	16.5156	DIFF
LINC01778	0.000336644	0.000877292	NO_DIFF
AL445235.1	0	0.000367834	NO_DIFF
SDC3	0.75194	0.209746	DIFF
RN7SL371P	0	0.000162266	NO_DIFF
PUM1	1.01442	0.828678	NO_DIFF
AL356320.2	0	0.00177855	NO_DIFF
AL356320.1	0	0.000424836	NO_DIFF
AC114495.1	0	0.000257174	NO_DIFF
SNRNP40	0.122804	0.158243	NO_DIFF
AC114495.2	0.00922598	0.0143905	NO_DIFF
ZCCHC17	0.322199	0.370779	NO_DIFF
AL451070.1	0.000785386	0.00140827	NO_DIFF
FABP3	0.030791	0.0154499	NO_DIFF
SERINC2	0.0366093	0.0946147	NO_DIFF
LINC01226	0.0157862	0.0324861	NO_DIFF
TINAGL1	0.0512626	0.0354839	NO_DIFF
HCRTR1	0	0.00137674	NO_DIFF
PEF1	0.203165	0.293016	NO_DIFF
AC114488.2	0	0.000749026	NO_DIFF
AC114488.3	0.00340467	0.00100062	NO_DIFF
COL16A1	0.0253666	0.0103257	NO_DIFF
ADGRB2	0	0.000858856	NO_DIFF
SPOCD1	0.000368008	0.021946	NO_DIFF
AL354919.1	0	0.00095617	NO_DIFF
AL136115.2	0.00933626	0.0145126	NO_DIFF
PTP4A2	2.1462	3.30685	DIFF
AL136115.1	0.00049153	0.00064562	NO_DIFF
KHDRBS1	1.47871	1.32525	NO_DIFF
AL445248.1	0.00864602	0.00358987	NO_DIFF
TMEM39B	0.101374	0.0884574	NO_DIFF
KPNA6	0.509159	0.336276	NO_DIFF
AL049795.2	0.00192874	0.00216981	NO_DIFF
TXLNA	0.299543	0.35452	NO_DIFF
CCDC28B	0.0432256	0.0547121	NO_DIFF
AL049795.1	0.00159497	0.00182637	NO_DIFF
IQCC	0.0186182	0.00774724	NO_DIFF
DCDC2B	0.00293845	0.00141239	NO_DIFF
TMEM234	0.0469324	0.0835416	NO_DIFF
EIF3I	0.849132	1.34457	DIFF
MTMR9LP	0.029063	0.00832395	NO_DIFF
FAM167B	0.00449062	0.00774817	NO_DIFF
LCK	0.0263858	0.0216683	NO_DIFF
HDAC1	0.218322	0.385256	NO_DIFF
MARCKSL1	0.244863	0.942009	DIFF
AL109945.1	0	0.000427425	NO_DIFF
TSSK3	0.00509993	0.00292902	NO_DIFF
FAM229A	0.0175633	0.0271707	NO_DIFF
BSDC1	0.371	0.25258	NO_DIFF
AL356986.1	0	0.000183045	NO_DIFF
ZBTB8B	0.00858619	0.00577907	NO_DIFF
ZBTB8A	0.0484406	0.0133202	NO_DIFF
ZBTB8OS	0.393631	0.519382	NO_DIFF
RBBP4	0.716496	0.618361	NO_DIFF
SYNC	0.0257962	0.0462009	NO_DIFF
AC114489.1	0	0.000952777	NO_DIFF
KIAA1522	0.0240856	0.0128299	NO_DIFF
YARS	0.288682	0.381937	NO_DIFF
S100PBP	0.291787	0.152963	NO_DIFF
FNDC5	0.00745464	0.0319179	NO_DIFF
HPCA	0	0.00182288	NO_DIFF
TMEM54	0.0141918	0.0179431	NO_DIFF
RNF19B	0.281205	0.435304	NO_DIFF
AL031602.1	0	0.000359777	NO_DIFF
AL355864.1	0.000585577	0.00196459	NO_DIFF
AL355864.2	0	0.000922801	NO_DIFF
AL020995.1	0	0.000499052	NO_DIFF
AK2	0.266557	0.478021	NO_DIFF
RF00017.3	0.00110426	0.000538965	NO_DIFF
AZIN2	0.00292885	0.00356804	NO_DIFF
AL662907.1	0.00285072	0.0025233	NO_DIFF
TRIM62	0.0297731	0.0235946	NO_DIFF
AL662907.2	0.00201224	0.0014524	NO_DIFF
AL662907.3	0.00105797	0.00275256	NO_DIFF
ZNF362	0.190658	0.0679377	NO_DIFF
AL513327.3	0.000529812	0.000509613	NO_DIFF
A3GALT2	0	0.000287101	NO_DIFF
AL513327.1	0	0.00555945	NO_DIFF
PHC2	0.863439	1.75386	DIFF
MIR3605	0	8.7244e-05	NO_DIFF
RN7SKP16	0.0291992	0.0240177	NO_DIFF
ZSCAN20	0.00999325	0.00753026	NO_DIFF
AC115285.1	0	8.25783e-05	NO_DIFF
CSMD2	0.0019998	0.00426873	NO_DIFF
SMIM12	0.337899	0.439133	NO_DIFF
GJB4	0.00201057	0.00134466	NO_DIFF
GJA4	0.0113673	0.0068011	NO_DIFF
DLGAP3	0.0582208	0.0722123	NO_DIFF
AC114490.3	0.0288736	0.0144365	NO_DIFF
AC114490.2	0.00812184	0.00353566	NO_DIFF
TMEM35B	0.00454324	0.00119086	NO_DIFF
ZMYM6	0.283002	0.158695	NO_DIFF
ZMYM1	0.0895228	0.0676351	NO_DIFF
RPL12P45	0	0.000227078	NO_DIFF
EFCAB14P1	0.00111352	0.000297248	NO_DIFF
AL590434.1	0.00893306	0.00438712	NO_DIFF
SFPQ	3.43277	3.1256	NO_DIFF
ZMYM4	0.371463	0.314681	NO_DIFF
RF00091	0.000300479	0	NO_DIFF
RPL5P4	0.0427015	0.0325069	NO_DIFF
ZMYM4-AS1	0	0.000755852	NO_DIFF
RF00017.4	0	0.000277406	NO_DIFF
KIAA0319L	0.5918	0.229214	DIFF
AC004865.1	0	0.00102405	NO_DIFF
NCDN	0.0482663	0.0758108	NO_DIFF
AC004865.2	0.0395244	0.0414335	NO_DIFF
TFAP2E	0.00906649	0.00803279	NO_DIFF
PSMB2	0.592195	0.82896	NO_DIFF
C1orf216	0.0577357	0.0596852	NO_DIFF
CLSPN	0.065166	0.0520657	NO_DIFF
AL354864.1	0	0.00427317	NO_DIFF
AGO4	0.433856	0.315282	NO_DIFF
AGO1	0.303639	0.357036	NO_DIFF
AL139286.1	0	0.000166733	NO_DIFF
AL139286.2	0.00448256	0.00185082	NO_DIFF
AGO3	0.699926	0.566516	NO_DIFF
AL138787.1	0.00703451	0.00875843	NO_DIFF
TEKT2	0	0.00047747	NO_DIFF
ADPRHL2	0.116355	0.139949	NO_DIFF
COL8A2	0.028073	0.034049	NO_DIFF
TRAPPC3	0.402419	0.52618	NO_DIFF
MAP7D1	0.724272	0.83077	NO_DIFF
THRAP3	1.1101	0.869368	NO_DIFF
UBE2V2P4	0	0.000704381	NO_DIFF
SH3D21	0.0156058	0.0294404	NO_DIFF
EVA1B	0.524161	0.438991	NO_DIFF
AL591845.1	0.00854478	0.0151985	NO_DIFF
STK40	0.323288	0.529811	NO_DIFF
LSM10	0.483493	0.727077	NO_DIFF
OSCP1	0.0182968	0.00746182	NO_DIFF
MRPS15	0.59373	0.69112	NO_DIFF
CSF3R	0.950018	0.727679	NO_DIFF
AL596257.1	0.00106572	0.000271686	NO_DIFF
LINC01137	0.00823215	0.0223376	NO_DIFF
ZC3H12A	0.656097	0.519689	NO_DIFF
MEAF6	0.432826	0.404828	NO_DIFF
SNIP1	0.212481	0.232944	NO_DIFF
FTH1P1	0.000306571	0.00328474	NO_DIFF
AL034379.1	0.00112388	0.000175848	NO_DIFF
DNALI1	0.00167915	0.00110485	NO_DIFF
GNL2	0.396478	0.391188	NO_DIFF
AL513220.1	0	0.000371939	NO_DIFF
RSPO1	0.00138422	0	NO_DIFF
C1orf109	0.0729587	0.0700886	NO_DIFF
CDCA8	0.0110659	0.00786825	NO_DIFF
EPHA10	0	0.00116312	NO_DIFF
AL929472.1	0	0.000922825	NO_DIFF
MANEAL	0.0154708	0.0060883	NO_DIFF
AL929472.3	0	6.36519e-05	NO_DIFF
YRDC	0.102597	0.193788	NO_DIFF
C1orf122	0.422592	0.842745	DIFF
MTF1	0.399563	0.481596	NO_DIFF
AL929472.4	0	0.00116393	NO_DIFF
AL929472.2	0	0.00204152	NO_DIFF
INPP5B	0.095005	0.0777767	NO_DIFF
SF3A3	0.357829	0.494345	NO_DIFF
FHL3	0.193724	0.372957	NO_DIFF
UTP11	0.282394	0.333692	NO_DIFF
POU3F1	0.0593213	0.0234587	NO_DIFF
AL354702.1	0.000280063	0.000244895	NO_DIFF
RRAGC	0.406954	0.262004	NO_DIFF
AL139260.1	0.0264245	0.0158281	NO_DIFF
MYCBP	0.0827702	0.109752	NO_DIFF
AL139260.3	0	0.000216938	NO_DIFF
RHBDL2	0.00173155	0.00210584	NO_DIFF
AKIRIN1	0.765165	0.59661	NO_DIFF
NDUFS5	1.58096	2.79168	DIFF
MACF1	1.87759	1.98833	NO_DIFF
AL356055.1	0.00779255	0.00414276	NO_DIFF
AL442071.1	0.000675745	0.000130162	NO_DIFF
HSPE1P8	0	0.000175932	NO_DIFF
BMP8A	0.00614285	0.0117196	NO_DIFF
OXCT2P1	0	0.000159483	NO_DIFF
PPIEL	0.0990119	0.0746602	NO_DIFF
PABPC4	3.57357	1.81379	DIFF
PABPC4-AS1	0	0.00123075	NO_DIFF
SNORA55	0.00209797	0.000823049	NO_DIFF
HEYL	0.0177051	0.00848424	NO_DIFF
HPCAL4	0.00235718	0.000100659	NO_DIFF
PPIE	0.176985	0.192421	NO_DIFF
AL035404.1	0	0.000137558	NO_DIFF
BMP8B	0.0072184	0.0100331	NO_DIFF
OXCT2	0.00348947	0.00693001	NO_DIFF
AL033527.3	0.000906072	0.00108581	NO_DIFF
AL033527.5	0.00697706	0.0061204	NO_DIFF
AL033527.4	0	0.000360665	NO_DIFF
TRIT1	0.0470035	0.0577186	NO_DIFF
RF00019.18	0.000662409	0	NO_DIFF
MYCL	0.036454	0.0170425	NO_DIFF
MFSD2A	0.143495	0.10242	NO_DIFF
AL663070.1	0.0120282	0.0106795	NO_DIFF
CAP1	3.82314	3.87877	NO_DIFF
PPT1	1.48823	1.45317	NO_DIFF
AL512599.1	0	0.000434413	NO_DIFF
RLF	0.414286	0.471516	NO_DIFF
RNU6-1237P	0.00597253	0.00299476	NO_DIFF
TMCO2	0.00054416	0.00467395	NO_DIFF
AL050341.2	0.0281591	0.0247486	NO_DIFF
ZMPSTE24	0.245415	0.334993	NO_DIFF
AL050341.1	0	0.000120879	NO_DIFF
COL9A2	0.0279611	0.0103045	NO_DIFF
AL031985.2	0.000747337	0.000419149	NO_DIFF
SMAP2	4.01532	2.08355	DIFF
AL031985.1	0.011158	0.0100995	NO_DIFF
AL031985.4	0	0.000270108	NO_DIFF
ZFP69B	0.0314991	0.0203513	NO_DIFF
AL031985.3	0.0130555	0.00752986	NO_DIFF
AL603839.4	0	0.000162144	NO_DIFF
ZFP69	0.0282958	0.0166173	NO_DIFF
AL603839.3	0.00533407	0.00439296	NO_DIFF
EXO5	0.0477422	0.0260833	NO_DIFF
AL603839.1	0	0.000247289	NO_DIFF
AL603839.2	0.000431043	6.2486e-05	NO_DIFF
ZNF684	0.0588431	0.0357013	NO_DIFF
RIMS3	0.0163454	0.00724749	NO_DIFF
NFYC-AS1	0.0235099	0.0236245	NO_DIFF
NFYC	0.287454	0.358574	NO_DIFF
KCNQ4	0.000716819	0.00163705	NO_DIFF
RN7SL326P	0.00131675	0.00102557	NO_DIFF
CITED4	0.0933123	0.192232	NO_DIFF
CTPS1	0.0722029	0.137837	NO_DIFF
SLFNL1-AS1	0.00407346	0.00449178	NO_DIFF
SLFNL1	0	0.000494347	NO_DIFF
SCMH1	0.035795	0.0492712	NO_DIFF
RPL23AP17	0	0.000448052	NO_DIFF
AC093151.3	0.00187744	0.000866076	NO_DIFF
FOXO6	0.00396836	0.00205468	NO_DIFF
AC093151.2	0.00404242	0	NO_DIFF
EDN2	0.0012693	0.00375024	NO_DIFF
HIVEP3	0.119044	0.233665	NO_DIFF
AL445933.1	0	9.65715e-05	NO_DIFF
GUCA2B	0	8.59054e-05	NO_DIFF
GUCA2A	0	0.000127226	NO_DIFF
FOXJ3	0.259659	0.256629	NO_DIFF
RIMKLA	0.00778635	0.00102214	NO_DIFF
AL513331.1	0.00116003	0	NO_DIFF
ZMYND12	0.00709445	0.00414354	NO_DIFF
PPCS	0.749543	0.648443	NO_DIFF
CCDC30	0.0623938	0.0205627	NO_DIFF
AL445669.1	0.00399693	0.00078863	NO_DIFF
TMSB4XP1	0	0.000218682	NO_DIFF
AL445669.2	0	0.000905113	NO_DIFF
PPIH	0.113228	0.138047	NO_DIFF
AC098484.4	0.00389217	0.0025958	NO_DIFF
AC098484.2	0.000995557	0.00031944	NO_DIFF
YBX1	7.77764	8.81648	NO_DIFF
CLDN19	0.00679174	0.00471016	NO_DIFF
P3H1	0.13709	0.131789	NO_DIFF
C1orf50	0.0321523	0.0220481	NO_DIFF
AC098484.3	0	0.000139047	NO_DIFF
TMEM269	0.00432714	0.00607267	NO_DIFF
SVBP	0.303728	0.288361	NO_DIFF
ERMAP	0.108632	0.0547646	NO_DIFF
AL512353.1	0.00829409	0.00666997	NO_DIFF
ZNF691	0.0306338	0.0157086	NO_DIFF
AL512353.2	0	0.000130208	NO_DIFF
AL512353.3	0	0.000496332	NO_DIFF
SLC2A1	0.0145554	0.0339904	NO_DIFF
ATP6V0CP4	0	0.000124084	NO_DIFF
SLC2A1-AS1	0.000962006	0.00243624	NO_DIFF
EBNA1BP2	0.198479	0.463732	DIFF
CFAP57	0.000749906	0.00022835	NO_DIFF
TMEM125	0.000182852	0	NO_DIFF
TIE1	0.0143285	0.00995148	NO_DIFF
AL139289.2	0.00700734	0.00646303	NO_DIFF
CDC20	0.00710642	0.00825099	NO_DIFF
ELOVL1	0.351144	0.687678	DIFF
MED8	0.231957	0.402239	NO_DIFF
AL139289.1	0.00045183	0.000868758	NO_DIFF
SZT2	0.163304	0.147744	NO_DIFF
HYI	0.0983763	0.0466695	NO_DIFF
HYI-AS1	0.00127297	0.00209753	NO_DIFF
PTPRF	0.00717339	0.00671095	NO_DIFF
KDM4A	0.137089	0.0681082	NO_DIFF
KDM4A-AS1	0.00257631	0.00753036	NO_DIFF
ST3GAL3	0.0448918	0.0410456	NO_DIFF
AL451062.2	0	0.000743901	NO_DIFF
SHMT1P1	0	0.000165425	NO_DIFF
ARTN	0.00336412	0.000667262	NO_DIFF
AL357079.1	0	0.00219905	NO_DIFF
IPO13	0.0851991	0.0872958	NO_DIFF
AL357079.2	0	0.00173246	NO_DIFF
DPH2	0.0447209	0.0912679	NO_DIFF
ATP6V0B	3.03426	5.24746	DIFF
B4GALT2	0.0286071	0.0644077	NO_DIFF
CCDC24	0.00946055	0.0134532	NO_DIFF
SLC6A9	0.000876936	0.000688195	NO_DIFF
AL139220.2	0.00547342	0.00613278	NO_DIFF
KLF17	0	0.000273415	NO_DIFF
AL356653.1	0	0.000927081	NO_DIFF
AL035417.2	0.00134819	0.000872744	NO_DIFF
DMAP1	0.168915	0.159512	NO_DIFF
ERI3	0.15507	0.177557	NO_DIFF
ERI3-IT1	0	0.000327383	NO_DIFF
RNF220	0.267161	0.376891	NO_DIFF
TMEM53	0.0659849	0.0969234	NO_DIFF
ARMH1	0.0675385	0.151989	NO_DIFF
RNU5F-1	0.00546948	0.00654726	NO_DIFF
RNU5D-1	0.00385011	0.034092	NO_DIFF
KIF2C	0.00101934	0.00474377	NO_DIFF
AL592166.1	0.00184109	0.00125179	NO_DIFF
RPS8	29.7592	21.8678	DIFF
SNORD46	0	0.000277091	NO_DIFF
SNORD38A	0	0.000289999	NO_DIFF
RPS15AP11	0.00255306	0.0028714	NO_DIFF
BEST4	0.000976933	0.00562173	NO_DIFF
PLK3	1.11811	1.19373	NO_DIFF
TCTEX1D4	0.0025755	0.0102787	NO_DIFF
BTBD19	0.0940061	0.162031	NO_DIFF
PTCH2	0.0124265	0.0274519	NO_DIFF
AL136380.1	0.00336345	0.00376898	NO_DIFF
EIF2B3	0.102808	0.162666	NO_DIFF
RNA5SP47	0	0.000965286	NO_DIFF
CCNB1IP1P1	0	0.00137733	NO_DIFF
PPIAP35	0	0.000330671	NO_DIFF
MRPS17P1	0.00366827	0.00416241	NO_DIFF
HECTD3	0.148354	0.0944311	NO_DIFF
UROD	0.305542	0.306685	NO_DIFF
ZSWIM5	0.00248481	0.000390825	NO_DIFF
LINC01144	0.000624091	0.00183623	NO_DIFF
HPDL	0	0.00108668	NO_DIFF
MUTYH	0.0440808	0.0411791	NO_DIFF
TOE1	0.0570893	0.0696382	NO_DIFF
TESK2	0.0886777	0.04334	NO_DIFF
PPIAP36	0.000428142	4.8121e-05	NO_DIFF
CCDC163	0.0281465	0.0272874	NO_DIFF
MMACHC	0.0128083	0.0178212	NO_DIFF
PRDX1	2.60469	3.0185	NO_DIFF
HMGB1P48	0.000562395	0.000308956	NO_DIFF
AKR1A1	0.956603	0.871255	NO_DIFF
NASP	1.52898	0.826852	DIFF
AL355480.4	0	0.000523153	NO_DIFF
CCDC17	0.0126593	0.00983794	NO_DIFF
GPBP1L1	0.587035	0.549364	NO_DIFF
RPS15AP10	0.0910907	0.0379154	NO_DIFF
AL604028.2	0.00890353	0.00646955	NO_DIFF
TMEM69	0.179482	0.118076	NO_DIFF
IPP	0.0259208	0.0303118	NO_DIFF
AL604028.1	0.00165796	0.0020809	NO_DIFF
AL603882.1	0.000652782	0	NO_DIFF
MAST2	0.083545	0.0854082	NO_DIFF
TMA16P2	0	4.34901e-05	NO_DIFF
PIK3R3	0.303978	0.057934	DIFF
AL358075.1	0	0.0024979	NO_DIFF
TSPAN1	0	0.000203739	NO_DIFF
POMGNT1	0.0757938	0.0854198	NO_DIFF
LURAP1	0.0351804	0.00124306	NO_DIFF
RAD54L	0.0023187	0.00128449	NO_DIFF
LRRC41	0.254733	0.229768	NO_DIFF
UQCRH	2.61573	2.66442	NO_DIFF
NSUN4	0.197418	0.216793	NO_DIFF
AL122001.1	0.00141238	0.00117048	NO_DIFF
FAAH	0.0135796	0.0143139	NO_DIFF
FAAHP1	0	0.00314272	NO_DIFF
DMBX1	0.0037304	0.00129841	NO_DIFF
TMEM275	0	0.00121932	NO_DIFF
MKNK1-AS1	0	0.00110154	NO_DIFF
KNCN	0.00135784	0.00351381	NO_DIFF
MKNK1	1.32811	0.795131	DIFF
MOB3C	0.169214	0.102038	NO_DIFF
ATPAF1	0.155703	0.138064	NO_DIFF
NENFP1	0	0.000242908	NO_DIFF
TEX38	0	0.00143078	NO_DIFF
EFCAB14-AS1	0.000410258	0	NO_DIFF
EFCAB14	0.90356	0.785281	NO_DIFF
AL593856.1	0	9.1717e-05	NO_DIFF
CYP4B1	0.0481104	0.00337526	NO_DIFF
CYP4X1	0.00426986	0.00154848	NO_DIFF
CYP4Z1	0.000505774	0	NO_DIFF
CYP4A22-AS1	0.00137398	0.000153959	NO_DIFF
LINC00853	0.00230722	0.000358049	NO_DIFF
PDZK1IP1	0.000790277	0.000601697	NO_DIFF
TAL1	0.000857968	0.000645195	NO_DIFF
STIL	0.0294353	0.0385433	NO_DIFF
CMPK1	0.843911	0.695754	NO_DIFF
LINC01389	0.000250379	0	NO_DIFF
FOXE3	0	0.000166582	NO_DIFF
FOXD2-AS1	0.0219747	0.0143502	NO_DIFF
FOXD2	0.0123062	0.00591706	NO_DIFF
TRABD2B	0.00318675	0.00438823	NO_DIFF
SKINT1L	0.00114107	0	NO_DIFF
SLC5A9	0.00361638	0.00246772	NO_DIFF
AL109659.2	0.000663223	0.000851682	NO_DIFF
AL109659.3	0	6.7093e-05	NO_DIFF
SPATA6	0.194818	0.0718247	NO_DIFF
PPP1R8P1	0.00105797	0.00152698	NO_DIFF
BEND5	0.00485966	0.00163725	NO_DIFF
ELAVL4	0.022461	0.000705228	NO_DIFF
AL596275.1	0	0.000138372	NO_DIFF
HMGB1P45	0.000135071	0.000244603	NO_DIFF
DMRTA2	0.00104972	0.00114679	NO_DIFF
FAF1	0.1728	0.16444	NO_DIFF
PHBP12	0	0.000230082	NO_DIFF
CDKN2C	0.165801	0.0685522	NO_DIFF
LINC01562	0.00104834	0.00476201	NO_DIFF
RNF11	0.447856	0.432765	NO_DIFF
AL162430.1	0	0.000477912	NO_DIFF
AL162430.2	0	0.000251154	NO_DIFF
TTC39A	0.00433227	0.0114706	NO_DIFF
TTC39A-AS1	0.00269475	0.00444886	NO_DIFF
EPS15	1.70555	0.695935	DIFF
AL671986.1	0	0.00147996	NO_DIFF
AC104170.2	0	0.000109717	NO_DIFF
AC104170.1	0.000933201	0.000349845	NO_DIFF
CALR4P	0.000809533	0	NO_DIFF
OSBPL9	0.4156	0.261772	NO_DIFF
RF00568	0	0.000136942	NO_DIFF
NRDC	0.789154	1.09059	NO_DIFF
AL050343.1	0.00837058	0.0105641	NO_DIFF
AL050343.2	0.00232631	0.0012235	NO_DIFF
RAB3B	0.000618543	0.00135499	NO_DIFF
TXNDC12	0.0619091	0.0483732	NO_DIFF
KTI12	0.0527946	0.0692242	NO_DIFF
TXNDC12-AS1	0	0.000192067	NO_DIFF
BTF3L4	0.686668	0.770402	NO_DIFF
ZFYVE9	0.007883	0.0364072	NO_DIFF
RN7SL788P	0	0.000108372	NO_DIFF
AL139156.2	0	8.3968e-05	NO_DIFF
PDCL3P6	0	0.000467739	NO_DIFF
ANAPC10P1	0	0.000445326	NO_DIFF
CC2D1B	0.163513	0.17736	NO_DIFF
AL513218.1	0	0.000215444	NO_DIFF
PLA2G12AP1	0.09283	0.0397749	NO_DIFF
ORC1	0.00603273	0.00886587	NO_DIFF
PRPF38A	0.462585	0.398948	NO_DIFF
TUT4	0.464711	0.43209	NO_DIFF
AL591167.1	0	8.53159e-05	NO_DIFF
EEF1GP7	0	0.000117768	NO_DIFF
GPX7	0.00735157	0.0373625	NO_DIFF
SHISAL2A	0.00216154	0.0172003	NO_DIFF
COA7	0.0981909	0.0979947	NO_DIFF
NDUFS5P3	0.000746566	0.00014987	NO_DIFF
ZYG11B	0.581848	0.33148	NO_DIFF
RPS13P2	0	0.00225226	NO_DIFF
ZYG11A	0	0.00068329	NO_DIFF
ECHDC2	0.0813652	0.0342284	NO_DIFF
AC099677.1	0.000346851	0	NO_DIFF
SCP2	1.17864	0.841667	NO_DIFF
AL445183.3	0	0.000404739	NO_DIFF
PODN	0.0873136	0.019088	NO_DIFF
SLC1A7	0.000437839	0.000227326	NO_DIFF
AL445183.2	0.00111211	0	NO_DIFF
CPT2	0.219588	0.158575	NO_DIFF
AL606760.2	0.00270989	0.00383844	NO_DIFF
CZIB	0.276455	0.261477	NO_DIFF
AL606760.3	0.00999278	0.00643033	NO_DIFF
MAGOH	0.39816	0.653414	NO_DIFF
AL606760.1	0.00888861	0.00301141	NO_DIFF
LRP8	0.0273277	0.084098	NO_DIFF
AL355483.4	0	0.000232108	NO_DIFF
AL355483.2	0	6.50519e-05	NO_DIFF
AL355483.1	0	0.000280404	NO_DIFF
LINC01771	0	0.00122444	NO_DIFF
AC119428.1	0.000791697	0	NO_DIFF
AC119428.2	0.0421595	0.00709678	NO_DIFF
GLIS1	0.00148921	0	NO_DIFF
NDC1	0.0792596	0.0664313	NO_DIFF
RF00418	0.001366	0	NO_DIFF
AL049745.1	0.0024488	0.000364039	NO_DIFF
YIPF1	0.16776	0.199934	NO_DIFF
DIO1	0	0.000898432	NO_DIFF
HSPB11	0.272309	0.284392	NO_DIFF
LRRC42	0.0558966	0.0614923	NO_DIFF
LDLRAD1	0	0.000541875	NO_DIFF
TMEM59	1.48928	1.47873	NO_DIFF
AL353898.3	0.009146	0.00882275	NO_DIFF
TCEANC2	0.117178	0.0599003	NO_DIFF
AL353898.1	0.00105985	0.000570319	NO_DIFF
AL357673.1	0.00112118	7.7582e-05	NO_DIFF
CDCP2	0	7.88667e-05	NO_DIFF
AL357673.2	0	0.000147193	NO_DIFF
CYB5RL	0.0368072	0.0161295	NO_DIFF
MRPL37	0.240993	0.220004	NO_DIFF
SSBP3	0.221943	0.468883	DIFF
SSBP3-AS1	0.000821287	0.000335644	NO_DIFF
ACOT11	0.129803	0.0742645	NO_DIFF
FAM151A	0	0.000568874	NO_DIFF
MROH7	0.0175059	0.00402852	NO_DIFF
TTC4	0.03734	0.0312874	NO_DIFF
PARS2	0.00490542	0.00659242	NO_DIFF
TTC22	0.000768588	0.000438292	NO_DIFF
AC096536.1	0	0.000162414	NO_DIFF
DHCR24	0.0322351	0.0434657	NO_DIFF
AC096536.2	0	8.23096e-05	NO_DIFF
DHCR24-DT	0	9.91699e-05	NO_DIFF
AL590440.2	0.000765506	0.00300276	NO_DIFF
TMEM61	0.000967491	0.000665942	NO_DIFF
BSND	0.000615304	0.000305946	NO_DIFF
PCSK9	0.000370137	0.00116525	NO_DIFF
USP24	0.389962	0.33511	NO_DIFF
MIR4422HG	0.000727577	0.00104478	NO_DIFF
GYG1P3	0	0.000297958	NO_DIFF
AL603840.1	0.00116534	0	NO_DIFF
AC119674.1	0.00166781	0.00325496	NO_DIFF
AC119674.2	0.00465569	0.0138376	NO_DIFF
PLPP3	0.225738	0.35195	NO_DIFF
RPL21P23	0.000518833	0.00241344	NO_DIFF
PRKAA2	0.00248544	0.00129446	NO_DIFF
C8B	0	0.0014883	NO_DIFF
DAB1	0.00401233	0.00137969	NO_DIFF
HNRNPA1P6	0.000836813	0	NO_DIFF
RPS26P15	0.00108576	0.000324257	NO_DIFF
OMA1	0.12486	0.102488	NO_DIFF
TACSTD2	0.00273078	0.00247151	NO_DIFF
AL035411.1	0	0.000379577	NO_DIFF
MYSM1	0.450437	0.271052	NO_DIFF
AL136985.3	0	0.00832043	NO_DIFF
JUN	23.5971	14.4869	DIFF
LINC01135	0.00130914	0.00350382	NO_DIFF
AL136985.2	0.000911292	0.00054865	NO_DIFF
AC105277.1	0.0134596	0.0244806	NO_DIFF
LINC01358	0.00506778	0.00601838	NO_DIFF
PHBP3	0	0.000192356	NO_DIFF
AC093425.1	0.00371164	0.0078087	NO_DIFF
AC093424.1	0.001643	0.00544954	NO_DIFF
FGGY	0.0397062	0.0576128	NO_DIFF
HOOK1	0.00164338	0.00237222	NO_DIFF
LINC01748	0	0.000222463	NO_DIFF
NFIA	0.778302	0.151063	DIFF
NFIA-AS2	0	0.0002404	NO_DIFF
AC096947.1	0.00129315	0.00142393	NO_DIFF
NFIA-AS1	0	0.000575385	NO_DIFF
TM2D1	0.423053	0.331771	NO_DIFF
AC099791.2	0.00153355	0.00190425	NO_DIFF
PATJ	0.0089129	0.00990933	NO_DIFF
LAMTOR5P1	0.000580458	4.85221e-05	NO_DIFF
RN7SL180P	0	0.00104849	NO_DIFF
L1TD1	0.00894823	0.0187209	NO_DIFF
KANK4	0.000420654	0.0011161	NO_DIFF
USP1	0.421776	0.333738	NO_DIFF
DOCK7	0.268357	0.29234	NO_DIFF
AL138847.1	0.000331708	0.00125027	NO_DIFF
AC103923.1	0	0.00191222	NO_DIFF
ATG4C	0.319969	0.135132	NO_DIFF
AC099794.1	0.000479041	0	NO_DIFF
AC096543.1	0	4.98919e-05	NO_DIFF
FOXD3-AS1	0.000565728	0.00166958	NO_DIFF
FOXD3	0.000612712	0.00350462	NO_DIFF
ALG6	0.059932	0.0610776	NO_DIFF
ITGB3BP	0.0954718	0.0676251	NO_DIFF
EFCAB7	0.0163511	0.00585067	NO_DIFF
DLEU2L	0.0136276	0.00186386	NO_DIFF
PGM1	0.0926473	0.110357	NO_DIFF
RN7SL130P	0.00407998	0.00282941	NO_DIFF
ROR1	0.00656551	0.00177781	NO_DIFF
ROR1-AS1	0	0.000632788	NO_DIFF
UBE2U	0.000713971	0	NO_DIFF
CACHD1	0.0188639	0.00330246	NO_DIFF
RAVER2	0.0136548	0.00506243	NO_DIFF
JAK1	1.75741	2.28401	NO_DIFF
AL606517.2	0	0.00201563	NO_DIFF
AL606517.1	0	0.00051034	NO_DIFF
LINC01359	0.0197865	0.0212714	NO_DIFF
SLC2A3P2	0	0.000428442	NO_DIFF
AL357078.3	0.00142607	0.00864673	NO_DIFF
RNU6-1176P	0	0.000902734	NO_DIFF
MIR3671	0	0.000255829	NO_DIFF
AL357078.1	0	0.00459057	NO_DIFF
AL357078.2	0	0.00077846	NO_DIFF
AK4	0.0257444	0.1216	NO_DIFF
RPS29P7	0	0.00103646	NO_DIFF
DNAJC6	0.00176131	0.00345107	NO_DIFF
LEPROT	1.18356	1.41857	NO_DIFF
LEPR	0.0488566	0.0666781	NO_DIFF
AC119800.1	0.00171661	0.0126631	NO_DIFF
RN7SL854P	0.00145279	0	NO_DIFF
PDE4B	1.03194	2.22777	DIFF
SGIP1	0.0106149	0.0206922	NO_DIFF
AL139147.1	0.00119382	0.00240364	NO_DIFF
TCTEX1D1	0.0347782	0.200155	NO_DIFF
WDR78	0.00505035	0.00238042	NO_DIFF
AL592161.1	0	6.4463e-05	NO_DIFF
MIER1	0.84495	0.821604	NO_DIFF
SLC35D1	0.0677231	0.0645544	NO_DIFF
AL133320.1	0.000899919	0.00021125	NO_DIFF
IL23R	0	0.00029177	NO_DIFF
IL12RB2	0.0773254	0.0073208	NO_DIFF
SERBP1	2.00022	2.54499	NO_DIFF
GADD45A	0.601767	0.964451	DIFF
GNG12	0.189624	0.0523659	NO_DIFF
GNG12-AS1	0.0049545	0.000841274	NO_DIFF
DIRAS3	0.00999551	0.00187151	NO_DIFF
WLS	0.759614	0.137226	DIFF
CTBP2P8	0.0197832	0.00455041	NO_DIFF
RPE65	0.000563121	0.000645881	NO_DIFF
DEPDC1	0.00556508	0.00324033	NO_DIFF
DEPDC1-AS1	0.000533235	0	NO_DIFF
LRRC7	0.00130363	0.00213609	NO_DIFF
LRRC40	0.148296	0.113987	NO_DIFF
RN7SL242P	0.00119766	0.00103484	NO_DIFF
SRSF11	2.35279	1.61737	DIFF
AL353771.1	0	0.00050319	NO_DIFF
ANKRD13C	0.148011	0.138291	NO_DIFF
HHLA3	0.029923	0.0256177	NO_DIFF
CTH	0.0222683	0.067493	NO_DIFF
RF00017.6	0	0.00117967	NO_DIFF
AL354872.2	0	0.00402189	NO_DIFF
AL354872.1	0.00108388	0	NO_DIFF
PTGER3	0.0135996	0.00441503	NO_DIFF
AL031429.1	0	0.000343144	NO_DIFF
AL031429.2	0	0.000372879	NO_DIFF
ZRANB2-AS1	0	0.000252811	NO_DIFF
ZRANB2	0.664858	0.470465	NO_DIFF
ZRANB2-AS2	0.00842608	0.00146537	NO_DIFF
NEGR1	0.0320074	0.0100464	NO_DIFF
GDI2P2	0	0.000252374	NO_DIFF
LRRIQ3	0.00366184	0.00106744	NO_DIFF
FPGT	0.122497	0.0805996	NO_DIFF
FPGT-TNNI3K	0.0121222	0.00151201	NO_DIFF
TNNI3K	0	0.000488537	NO_DIFF
AC135803.1	0.00136038	0.00203423	NO_DIFF
CRYZ	0.0695855	0.0584726	NO_DIFF
TYW3	0.227588	0.239537	NO_DIFF
SLC44A5	0	0.000231741	NO_DIFF
ACADM	0.318401	0.191189	NO_DIFF
DLSTP1	0	0.000144297	NO_DIFF
RABGGTB	0.327128	0.305436	NO_DIFF
MSH4	0.00241724	0.000855925	NO_DIFF
ST6GALNAC3	0.0446648	0.0457859	NO_DIFF
AC104458.1	0.000306571	0.000534797	NO_DIFF
TPI1P1	0	0.000436273	NO_DIFF
ST6GALNAC5	0	0.000920355	NO_DIFF
PIGK	0.121909	0.068813	NO_DIFF
AC113935.1	0	0.000472139	NO_DIFF
AC093433.1	0	0.000307916	NO_DIFF
AK5	0.00055625	0.00272622	NO_DIFF
AC118549.1	0.213621	0.207957	NO_DIFF
RN7SL370P	0	0.000400587	NO_DIFF
USP33	0.432117	0.346676	NO_DIFF
MIGA1	0.27545	0.196489	NO_DIFF
AC138392.1	0.000390335	0.00116917	NO_DIFF
NSRP1P1	0.0619166	0.0261386	NO_DIFF
HSPE1P25	0	0.000184333	NO_DIFF
NEXN-AS1	0.00266789	0.00116712	NO_DIFF
NEXN	0.149736	0.0436103	NO_DIFF
FUBP1	0.354718	0.568228	NO_DIFF
DNAJB4	1.37634	0.525051	DIFF
GIPC2	0.018153	0.00149028	NO_DIFF
AC103591.3	0.142353	0.296967	NO_DIFF
AC103591.4	0	0.000529957	NO_DIFF
AC103591.1	0.00152338	0.000149108	NO_DIFF
AC096531.2	0.000803503	0.000147281	NO_DIFF
PTGFR	0.00491325	0.00432424	NO_DIFF
IFI44L	0.280499	0.130266	NO_DIFF
IFI44	0.494182	0.280731	NO_DIFF
AC104837.2	0	0.00232263	NO_DIFF
ADGRL4	0.0199675	0.0266166	NO_DIFF
HNRNPA1P64	0.00103784	0	NO_DIFF
LINC01781	0.00149577	0	NO_DIFF
AL357632.1	0	0.000565705	NO_DIFF
ADGRL2	0.0244881	0.00596513	NO_DIFF
HNRNPA3P14	0.000439288	7.43799e-05	NO_DIFF
AL138799.2	0.00111641	0	NO_DIFF
AL138799.3	0	0.000307348	NO_DIFF
ST13P20	0.00112935	0	NO_DIFF
AL157944.1	0	0.000942891	NO_DIFF
LINC01362	0	0.000176313	NO_DIFF
LINC01725	0.000738305	0.00099464	NO_DIFF
TTLL7	0.0431021	0.0167769	NO_DIFF
TTLL7-IT1	0.00104067	0.00078878	NO_DIFF
AL359504.2	0.00358203	0.000789513	NO_DIFF
PRKACB	0.669184	0.201281	DIFF
AL450063.1	0	0.000945799	NO_DIFF
SAMD13	0.00908525	0.00199122	NO_DIFF
UOX	0.000568678	0.000248221	NO_DIFF
DNASE2B	0.00770587	0.00236666	NO_DIFF
AL844170.1	0	4.88713e-05	NO_DIFF
RPF1	0.235967	0.29986	NO_DIFF
GNG5	0.378279	0.728776	DIFF
AL359762.3	0.00667948	0.00807165	NO_DIFF
SPATA1	0.0311641	0.0403134	NO_DIFF
CTBS	0.416127	0.314417	NO_DIFF
AL359762.1	0.0774975	0.0611846	NO_DIFF
AL359762.2	0	0.000303319	NO_DIFF
SSX2IP	0.0225128	0.0394335	NO_DIFF
LPAR3	0.00169087	0.0957138	NO_DIFF
MCOLN2	0.0285927	0.00576944	NO_DIFF
WDR63	0.00255738	0.00222528	NO_DIFF
MCOLN3	0.00385109	0.00301782	NO_DIFF
AL603750.1	0	0.000597881	NO_DIFF
SYDE2	0.00955045	0.0038791	NO_DIFF
C1orf52	0.354638	0.363659	NO_DIFF
BCL10	0.758068	0.628493	NO_DIFF
AL078459.1	0.0145057	0.0145388	NO_DIFF
DDAH1	0.0053621	0.00482461	NO_DIFF
AC092807.3	0.00154391	0.000350866	NO_DIFF
AC092807.2	0	9.91431e-05	NO_DIFF
CCN1	0.118899	0.131483	NO_DIFF
ZNHIT6	0.155432	0.133001	NO_DIFF
COL24A1	0.00230518	0.00867635	NO_DIFF
AL136382.1	0	0.000781333	NO_DIFF
ODF2L	0.248893	0.160291	NO_DIFF
CLCA2	0.00065376	0.000469452	NO_DIFF
CLCA4-AS1	0.0010745	0.00332199	NO_DIFF
AL049597.2	0.00589892	0.0159041	NO_DIFF
SH3GLB1	1.4505	1.89344	NO_DIFF
AL049597.1	0.000815803	0.0014284	NO_DIFF
SELENOF	0.82883	1.23628	DIFF
HS2ST1	0.144317	0.202348	NO_DIFF
AL121989.1	0.00172174	0.000905878	NO_DIFF
AC093155.1	0.00237456	0.000868875	NO_DIFF
LINC01140	0.00146907	0.00327219	NO_DIFF
AC099062.1	0.000651668	0.00162117	NO_DIFF
LMO4	1.87848	1.02818	DIFF
PKN2-AS1	0.00202781	0.000403648	NO_DIFF
PKN2	0.732749	0.407083	DIFF
RNU6-125P	0.00683954	0.00105205	NO_DIFF
ELOCP19	0.0242604	0.0199368	NO_DIFF
GTF2B	0.720527	0.423279	DIFF
KYAT3	0.129278	0.101994	NO_DIFF
RBMXL1	0.302074	0.204504	NO_DIFF
GBP3	0.23865	0.10275	NO_DIFF
GBP1	0.189298	0.299707	NO_DIFF
PTGES3P1	0.0237634	0.0447981	NO_DIFF
GBP2	0.818302	1.44236	DIFF
GBP7	0.00252653	0.000627395	NO_DIFF
GBP4	0.140745	0.0549446	NO_DIFF
AC099063.4	0.00391752	0.000664534	NO_DIFF
GBP5	0.0957946	0.130265	NO_DIFF
GBP6	0	0.000429487	NO_DIFF
GBP1P1	0.00118274	0.00151898	NO_DIFF
LRRC8B	0.145572	0.104395	NO_DIFF
LRRC8C-DT	0.0279328	0.028945	NO_DIFF
AC093423.2	0	9.34345e-05	NO_DIFF
LRRC8C	0.271011	0.25553	NO_DIFF
AC099568.1	0.00418255	0.00168868	NO_DIFF
AC099568.2	0.00485282	0.00634876	NO_DIFF
LRRC8D	0.258244	0.15979	NO_DIFF
AL391497.1	0	4.63893e-05	NO_DIFF
GEMIN8P4	0.00103538	0.000994446	NO_DIFF
ZNF326	0.552101	0.445305	NO_DIFF
LINC02609	0.00498117	0.00128347	NO_DIFF
AC091614.1	0	0.000392858	NO_DIFF
PHKA1P1	0.000405519	0.000425591	NO_DIFF
ZNF644	1.00118	0.697032	NO_DIFF
RPL5P6	0.000968411	0.000918902	NO_DIFF
CDC7	0.016493	0.0176131	NO_DIFF
AL714022.1	0	0.000105793	NO_DIFF
HSP90B3P	0	0.000344908	NO_DIFF
TGFBR3	0.0843075	0.0316942	NO_DIFF
RN7SL653P	0	0.000415188	NO_DIFF
BRDT	0.000501538	0.00133882	NO_DIFF
EPHX4	0	0.000744127	NO_DIFF
SETSIP	0.00056942	0.000125464	NO_DIFF
BTBD8	0.0415627	0.0183415	NO_DIFF
PRKAR1AP1	0.00164125	0	NO_DIFF
AC104836.1	0.00213031	0.000623319	NO_DIFF
GLMN	0.0558424	0.0666106	NO_DIFF
RPAP2	0.248359	0.138167	NO_DIFF
GFI1	0.00374484	0.00580278	NO_DIFF
EVI5	0.592031	0.406767	NO_DIFF
AL354890.1	0.00335964	0.00192406	NO_DIFF
HMGB3P9	0.0169987	0.00603512	NO_DIFF
RNU4-59P	0	8.03176e-05	NO_DIFF
AC104332.1	0.00207592	0.00141045	NO_DIFF
AC104332.2	0	0.000119456	NO_DIFF
CCNJP2	0	7.43875e-05	NO_DIFF
RPL5	11.2052	7.00474	DIFF
DIPK1A	0.0166997	0.00699712	NO_DIFF
SNORA66	0.00106908	0.000496659	NO_DIFF
RF00432	0	0.000293384	NO_DIFF
AL449283.1	0.00366212	0.00180816	NO_DIFF
RN7SL692P	0	9.38409e-05	NO_DIFF
RNU6-210P	0.00113209	0	NO_DIFF
MTF2	0.395299	0.357996	NO_DIFF
TMED5	0.962253	1.36234	DIFF
CCDC18	0.31504	0.251174	NO_DIFF
AC126124.2	0.00130835	0.00388156	NO_DIFF
CCDC18-AS1	0.305198	0.112002	NO_DIFF
AL139421.1	0.00366489	0.000946065	NO_DIFF
DR1	0.481484	0.550522	NO_DIFF
FNBP1L	0.0976057	0.0269146	NO_DIFF
BCAR3	0.130638	0.0119169	NO_DIFF
AL109613.1	0.000421118	0.0001257	NO_DIFF
AL049796.1	0.00546183	0.00736011	NO_DIFF
DNTTIP2	1.08513	1.31311	NO_DIFF
GCLM	0.338112	0.213106	NO_DIFF
ABCA4	0	0.000247958	NO_DIFF
ARHGAP29	0.0361592	0.0289611	NO_DIFF
AC118469.1	0.000582783	0	NO_DIFF
ABCD3	0.158411	0.139595	NO_DIFF
F3	0.0271757	0.0852069	NO_DIFF
AC093117.1	0	0.000137352	NO_DIFF
SLC44A3-AS1	0.00114869	0.00140155	NO_DIFF
SLC44A3	0.000249112	0.000620061	NO_DIFF
CNN3	0.0758116	0.0456568	NO_DIFF
AC105942.1	0.00544213	0.00101583	NO_DIFF
ALG14	0.0712443	0.0589976	NO_DIFF
TMEM56	0.00430534	0.00219639	NO_DIFF
TMEM56-RWDD3	0.00173732	0.00102272	NO_DIFF
AC092802.1	0.00128985	0.00073291	NO_DIFF
RWDD3	0.0139175	0.0125373	NO_DIFF
EEF1A1P11	0.00151029	0.000261204	NO_DIFF
RPL7P9	0.00123559	0.00497532	NO_DIFF
PTBP2	0.135865	0.186605	NO_DIFF
DPYD	0.872306	1.06787	NO_DIFF
DPYD-AS1	0.0007766	0.00158486	NO_DIFF
DPYD-IT1	0.0119909	0.00765446	NO_DIFF
SEC63P1	0.0038639	0.00731403	NO_DIFF
RPL26P9	0	0.00067391	NO_DIFF
AC114878.1	0	0.00409974	NO_DIFF
DPYD-AS2	0	0.00148068	NO_DIFF
AC114878.2	0	0.00105627	NO_DIFF
MIR137HG	0	4.13917e-05	NO_DIFF
AC095031.1	0	0.000123126	NO_DIFF
SNX7	0.0487491	0.0166104	NO_DIFF
AL445433.1	0.00327442	0.00842135	NO_DIFF
PALMD	0.0118096	0.00931394	NO_DIFF
FRRS1	0.0158606	0.0167323	NO_DIFF
AGL	0.172047	0.092287	NO_DIFF
AC118553.1	0.00368878	0.00136337	NO_DIFF
SLC35A3	0.205963	0.143649	NO_DIFF
AC118553.2	0.01028	0.0126969	NO_DIFF
MFSD14A	0.0215126	0.0135657	NO_DIFF
SASS6	0.0789563	0.0367431	NO_DIFF
TRMT13	0.132245	0.12544	NO_DIFF
LRRC39	0.00579972	0.00305404	NO_DIFF
DBT	0.16834	0.0916554	NO_DIFF
BRI3P1	0	0.00061695	NO_DIFF
AL445928.2	0.00476793	0.000843174	NO_DIFF
AL445928.1	0.000261504	0	NO_DIFF
RTCA-AS1	0.0237409	0.0130801	NO_DIFF
RTCA	0.373019	0.32613	NO_DIFF
AC104457.1	0	9.13173e-05	NO_DIFF
CDC14A	0.187237	0.14992	NO_DIFF
BCAS2P2	0	0.000545157	NO_DIFF
GPR88	0	0.000806756	NO_DIFF
AC099670.1	0.000435157	0	NO_DIFF
AC099670.3	0	0.000219402	NO_DIFF
VCAM1	0.241632	0.0038925	NO_DIFF
EXTL2	0.0793874	0.0476346	NO_DIFF
AC104506.1	0.0366448	0.0325976	NO_DIFF
SLC30A7	0.404497	0.346675	NO_DIFF
HNRNPA1P68	0.000347008	0.000198581	NO_DIFF
DPH5	0.0990414	0.0727475	NO_DIFF
AC093157.2	0.00312178	0.00740329	NO_DIFF
AC093157.1	0.0203916	0.0236505	NO_DIFF
AL109741.1	0.00285188	0.00195549	NO_DIFF
S1PR1	0.081699	0.0511543	NO_DIFF
AL109741.2	0	0.00120328	NO_DIFF
RPSAP19	0.000114302	0.00139991	NO_DIFF
COL11A1	0	0.0014837	NO_DIFF
RNPC3	0.553149	0.223805	DIFF
AMY2B	0.051457	0.0132934	NO_DIFF
SEPT2P1	0	0.000115053	NO_DIFF
AL512844.1	0.00226505	0.00326801	NO_DIFF
PRMT6	0.0642126	0.0385166	NO_DIFF
NTNG1	0.00224529	0.000593895	NO_DIFF
AC114491.1	0.00051308	0.0015196	NO_DIFF
VAV3	0.341914	0.706044	DIFF
VAV3-AS1	0.00549186	0.0155445	NO_DIFF
AL390036.1	0.0912088	0.116296	NO_DIFF
SLC25A24	0.581319	0.866159	NO_DIFF
AL359258.2	0.000878197	0.00152624	NO_DIFF
AL359258.3	0.000870863	0.00228152	NO_DIFF
SLC25A24P1	0.00800138	0.000540511	NO_DIFF
AL392088.2	0	6.2486e-05	NO_DIFF
FAM102B	0.274789	0.31058	NO_DIFF
HENMT1	0.0723066	0.0651634	NO_DIFF
AL160171.1	0.00164214	0.00151759	NO_DIFF
PRPF38B	2.21531	1.39928	DIFF
FNDC7	0.00724206	0.00797965	NO_DIFF
AL591719.2	0	0.000215154	NO_DIFF
STXBP3	0.57367	0.450987	NO_DIFF
AL591719.1	0	0.000136331	NO_DIFF
AKNAD1	0.00188529	0.00329746	NO_DIFF
AL449266.1	0.000351077	0.00240861	NO_DIFF
GPSM2	0.0543546	0.0516805	NO_DIFF
CLCC1	0.170116	0.102312	NO_DIFF
WDR47	0.210371	0.155409	NO_DIFF
BX679664.2	0.0135992	0.00478153	NO_DIFF
BX679664.3	0	0.000616882	NO_DIFF
BX679664.1	0.000464896	0.000328745	NO_DIFF
TAF13	0.337606	0.427974	NO_DIFF
AL356488.3	0.11627	0.0732378	NO_DIFF
TMEM167B	0.414582	0.593991	NO_DIFF
AL356488.1	0.000764548	0.000417453	NO_DIFF
C1orf194	0.000754165	0.000587792	NO_DIFF
KIAA1324	0.00769034	0.00460384	NO_DIFF
SARS	0.521675	0.462007	NO_DIFF
CELSR2	0.0196497	0.00415871	NO_DIFF
PSRC1	0.0214576	0.0153952	NO_DIFF
MYBPHL	0.00202186	0.00150576	NO_DIFF
SORT1	0.480932	0.335164	NO_DIFF
PSMA5	0.410395	0.871446	DIFF
SYPL2	0	6.40857e-05	NO_DIFF
ATXN7L2	0.00952444	0.0109954	NO_DIFF
CYB561D1	0.0446435	0.0584193	NO_DIFF
AMIGO1	0.00117038	0.00527577	NO_DIFF
GPR61	0	0.0016492	NO_DIFF
AL355310.3	0	0.000638751	NO_DIFF
GNAI3	1.76923	1.5265	NO_DIFF
AL355310.1	0.00623258	0.00189002	NO_DIFF
GNAT2	0.00034238	0.00184582	NO_DIFF
AMPD2	0.307169	0.478302	NO_DIFF
AL355310.2	0	0.00018268	NO_DIFF
RPL7P8	0.00944249	0.0223432	NO_DIFF
GSTM4	0.103796	0.0347805	NO_DIFF
GSTM2	0.0141019	0.00769245	NO_DIFF
GSTM1	0.00717557	0.000273799	NO_DIFF
AC000032.1	0	0.000216926	NO_DIFF
GSTM5	0.00555843	0.000949262	NO_DIFF
GSTM3	0.225507	0.0822833	NO_DIFF
LINC01768	0	0.000198072	NO_DIFF
AL450468.1	0	0.000124951	NO_DIFF
AL450468.2	0	0.0022147	NO_DIFF
CSF1	0.0511737	0.0891038	NO_DIFF
AHCYL1	1.20939	0.98681	NO_DIFF
STRIP1	0.15764	0.157052	NO_DIFF
AL160006.1	0.0218842	0.012469	NO_DIFF
ALX3	0	0.00145885	NO_DIFF
LINC01397	0	0.000431468	NO_DIFF
UBL4B	0	0.000761849	NO_DIFF
SLC6A17	0	0.000265074	NO_DIFF
LINC02586	0.000849546	0.000937881	NO_DIFF
KCNC4	0.0226621	0.0333223	NO_DIFF
RBM15-AS1	0.000930075	0.00332823	NO_DIFF
RBM15	0.105216	0.117307	NO_DIFF
LAMTOR5-AS1	0.0176111	0.017067	NO_DIFF
SLC16A4	0.0251893	0.0158484	NO_DIFF
AL355488.1	0.0269351	0.0192899	NO_DIFF
LAMTOR5	0.894279	1.17728	NO_DIFF
KCNA2	0.00218901	0.000394742	NO_DIFF
AL365361.1	0.00720026	0.0261419	NO_DIFF
KCNA3	0.00135795	0.00620885	NO_DIFF
NRBF2P3	0	0.0022006	NO_DIFF
CD53	2.18812	3.36827	DIFF
AL360270.2	0.0332492	0.047108	NO_DIFF
AL360270.1	0.0138215	0.019714	NO_DIFF
LRIF1	0.741379	0.80272	NO_DIFF
AL360270.3	0.00296707	0.0167557	NO_DIFF
DRAM2	1.13226	0.499124	DIFF
CEPT1	0.348144	0.293129	NO_DIFF
AL355816.1	0.0142986	0.00364828	NO_DIFF
AL355816.2	0.0644141	0.0303273	NO_DIFF
DENND2D	0.357851	0.274106	NO_DIFF
CHI3L2	0.0258881	0.0378263	NO_DIFF
CHIAP1	0	0.00025825	NO_DIFF
CHIAP2	0	0.00039	NO_DIFF
PIFO	0.00997299	0.00119174	NO_DIFF
PGCP1	0.000580127	0.000537241	NO_DIFF
OVGP1	0.0210057	0.00862498	NO_DIFF
AL390195.2	0.0209497	0.00567019	NO_DIFF
AL390195.1	0.00257263	0.000938837	NO_DIFF
WDR77	0.138002	0.146227	NO_DIFF
ATP5PB	1.16342	1.45796	NO_DIFF
C1orf162	5.40635	4.78558	NO_DIFF
TMIGD3	0.762459	0.66213	NO_DIFF
ADORA3	0.616454	0.107267	DIFF
RAP1A	1.85779	1.59923	NO_DIFF
LINC01160	0.00372482	0.00322503	NO_DIFF
KRT18P57	0	0.0030583	NO_DIFF
RNU6-151P	0	8.60162e-05	NO_DIFF
INKA2	0.20102	0.132609	NO_DIFF
INKA2-AS1	0.00436784	0.0056847	NO_DIFF
AL049557.1	0.0113646	0.0086097	NO_DIFF
DDX20	0.10881	0.123681	NO_DIFF
KCND3	0.00494292	0.00840892	NO_DIFF
LINC01750	0	0.000770358	NO_DIFF
CTTNBP2NL	0.687878	0.263611	DIFF
WNT2B	0.092522	0.0264829	NO_DIFF
AL354760.1	0.00129575	0.00360122	NO_DIFF
ST7L	0.0844023	0.127655	NO_DIFF
CAPZA1	1.54602	2.32576	DIFF
MOV10	0.113008	0.0754223	NO_DIFF
AL603832.1	0.00528438	0.00119108	NO_DIFF
RHOC	0.69812	0.668153	NO_DIFF
PPM1J	0.00357104	0.00278933	NO_DIFF
AL603832.2	0.000423982	0.00218611	NO_DIFF
FAM19A3	0.000442465	0.00138358	NO_DIFF
LINC01356	0.00244675	0	NO_DIFF
LINC01357	0.0109313	0	NO_DIFF
SLC16A1	0.292943	0.222807	NO_DIFF
SLC16A1-AS1	0.243257	0.108321	NO_DIFF
AL357055.3	0.00406629	0.00140249	NO_DIFF
LRIG2	0.119374	0.0904645	NO_DIFF
RLIMP2	0	0.000222126	NO_DIFF
AL357055.1	0.00080357	0.000511996	NO_DIFF
AL357055.2	0	0.000193986	NO_DIFF
MAGI3	0.0415443	0.0206299	NO_DIFF
AL391058.1	0.00386086	0.00168631	NO_DIFF
PHTF1	0.1622	0.179397	NO_DIFF
AL133517.1	0.000822439	0.00139082	NO_DIFF
RSBN1	0.47523	0.248734	NO_DIFF
AL137856.1	0.000712805	0.00134154	NO_DIFF
PTPN22	0.175008	0.225118	NO_DIFF
AP4B1-AS1	0.0169323	0.00522163	NO_DIFF
BCL2L15	0.0401801	0.0157573	NO_DIFF
AP4B1	0.110649	0.0662021	NO_DIFF
DCLRE1B	0.104255	0.063702	NO_DIFF
HIPK1-AS1	0.0443209	0.0700523	NO_DIFF
HIPK1	0.594305	0.693992	NO_DIFF
OLFML3	0.0686302	0.0374771	NO_DIFF
AL591742.2	0	0.000741695	NO_DIFF
SYT6	0.00285005	0.00930262	NO_DIFF
TRIM33	0.502542	0.403344	NO_DIFF
AL035410.1	0.00108735	0.00598863	NO_DIFF
EIF2S2P5	0	0.00062105	NO_DIFF
PKMP1	0	0.000332937	NO_DIFF
BCAS2	0.773182	0.452432	DIFF
DENND2C	0.0233568	0.0217188	NO_DIFF
AMPD1	0	0.000882299	NO_DIFF
RN7SL432P	0.000419671	0.00025565	NO_DIFF
NRAS	0.389587	0.429455	NO_DIFF
CSDE1	2.82177	2.56766	NO_DIFF
SIKE1	0.216966	0.234414	NO_DIFF
TSPAN2	0.0107242	0.0128738	NO_DIFF
LINC01765	0	0.000424217	NO_DIFF
NGF-AS1	0.00315057	0.000742743	NO_DIFF
NGF	0.00532707	0.0040923	NO_DIFF
VANGL1	0.0228209	0.0140599	NO_DIFF
CASQ2	0.00193063	0.000381353	NO_DIFF
NHLH2	0.00104336	0.00131346	NO_DIFF
LINC01649	0	0.00012202	NO_DIFF
SLC22A15	0.076163	0.111804	NO_DIFF
MAB21L3	0.0123265	0.00999826	NO_DIFF
LINC01779	0	0.000166847	NO_DIFF
ATP1A1	1.75374	3.28147	DIFF
ATP1A1-AS1	0.0118962	0.00950057	NO_DIFF
RNU6-817P	0.000613081	0	NO_DIFF
LINC01762	0.00234682	0.000453192	NO_DIFF
RF00019.37	0	0.000341303	NO_DIFF
AL390066.1	0.00612965	0.00597813	NO_DIFF
CD58	0.354041	0.618805	NO_DIFF
NAP1L4P1	0.0760638	0.0590368	NO_DIFF
MIR548AC	0.000351077	0.000638153	NO_DIFF
IGSF3	0.00268412	0.0054982	NO_DIFF
GAPDHP64	0	0.000126787	NO_DIFF
CD2	0.0608854	0.0500462	NO_DIFF
FTH1P22	0	0.000183952	NO_DIFF
AL157904.1	0.00116166	8.13961e-05	NO_DIFF
PTGFRN	0.125017	0.0309811	NO_DIFF
CD101	0.0107775	0.0161074	NO_DIFF
AL445231.1	0	0.000464594	NO_DIFF
TTF2	0.176793	0.151794	NO_DIFF
TRIM45	0.00248659	0.00609822	NO_DIFF
RPS15AP9	0.000537518	5.34514e-05	NO_DIFF
AL358072.1	0.00901723	0.00685036	NO_DIFF
MAN1A2	0.576772	0.691637	NO_DIFF
AL157902.2	0.00277292	0.00225316	NO_DIFF
AL157902.1	0	0.000336726	NO_DIFF
TENT5C	0.0953866	0.051368	NO_DIFF
GDAP2	0.2392	0.237415	NO_DIFF
WDR3	0.0992463	0.151008	NO_DIFF
SPAG17	0.00580422	0.00183261	NO_DIFF
PSMC1P12	0	0.00015862	NO_DIFF
TBX15	0	0.000430526	NO_DIFF
WARS2	0.0505952	0.048655	NO_DIFF
WARS2-IT1	0.000895184	0.000206258	NO_DIFF
RBMX2P3	0.00505158	0.00416845	NO_DIFF
RPS3AP12	0.00920389	0.00886016	NO_DIFF
WARS2-AS1	0.0214367	0.016255	NO_DIFF
GAPDHP32	0	0.000349393	NO_DIFF
GAPDHP27	0	0.000404891	NO_DIFF
GAPDHP33	0.00141186	0.00660691	NO_DIFF
LINC00622	0.00278382	0.0194053	NO_DIFF
HSD3BP5	0	0.00138007	NO_DIFF
ZNF697	0.0469785	0.146601	NO_DIFF
PHGDH	0.0178701	0.0128025	NO_DIFF
NBPF7	0	0.000332183	NO_DIFF
NOTCH2P1	0	0.000420905	NO_DIFF
ADAM30	0.0065231	0.00597546	NO_DIFF
NOTCH2	0.652824	0.543006	NO_DIFF
AC245008.1	0.000800411	0.00270136	NO_DIFF
SEC22B	0.60562	0.651537	NO_DIFF
AC244669.1	0.0379189	0.0347546	NO_DIFF
RF00003	0.00611624	0.120542	NO_DIFF
NBPF8	0.0113996	0.0088371	NO_DIFF
PFN1P2	0.00345067	0.00306476	NO_DIFF
AC241952.1	0.0107987	0.0110585	NO_DIFF
AC253572.1	0.00164721	0.00302563	NO_DIFF
NBPF26	0.0269431	0.036352	NO_DIFF
RNVU1-19	0.0159564	0.150127	NO_DIFF
AC241377.3	0	0.000170216	NO_DIFF
LINC00623	0.00846144	0.0164387	NO_DIFF
RNVU1-4	0.00138743	0.0122936	NO_DIFF
AC241377.4	0	0.00117563	NO_DIFF
AC241377.2	0.000226216	0.000286018	NO_DIFF
FCGR1B	0.0976531	0.21933	NO_DIFF
AC244453.3	0.00032681	0.000225057	NO_DIFF
AC244453.2	0.00119675	0.00241254	NO_DIFF
HIST2H2BA	0.000575427	0.000194486	NO_DIFF
FAM72B	0.0143638	0.00440163	NO_DIFF
SRGAP2C	0.579344	0.250778	DIFF
SRGAP2-AS1	0.0012321	0	NO_DIFF
AC244021.1	0.0231617	0.0023545	NO_DIFF
AL592494.1	0.0017837	0.00106929	NO_DIFF
MTIF2P1	0.00678051	0.0009496	NO_DIFF
AL592494.2	0.00737599	0.00214383	NO_DIFF
EMBP1	0.12489	0.0166265	NO_DIFF
NBPF17P	0.00286712	0.00262078	NO_DIFF
AC239800.2	0.00189959	0.00262856	NO_DIFF
AC239800.1	0	0.00178472	NO_DIFF
FAM91A3P	0.00061382	0.00077933	NO_DIFF
LINC02591	0	0.000163281	NO_DIFF
AC239798.1	0.00386261	0.00100184	NO_DIFF
FCGR1CP	0.0171944	0.0561066	NO_DIFF
AC239798.2	0.00243523	0.00271029	NO_DIFF
AC239798.4	0.00371797	0.000540331	NO_DIFF
FAM72C	0.00172277	0.00145955	NO_DIFF
IGKV1OR1-1	0	0.000607169	NO_DIFF
AC245595.1	0.00254486	0.00349266	NO_DIFF
RNVU1-15	0.00319752	0.0353505	NO_DIFF
AC246785.3	0.00271105	0.00503375	NO_DIFF
AC246785.2	0	0.000940235	NO_DIFF
NBPF15	0.0170445	0.00912386	NO_DIFF
PFN1P6	0	0.000230311	NO_DIFF
RF00003.2	0.00191333	0.00375261	NO_DIFF
RF00003.3	0.000501538	0.00192303	NO_DIFF
RF00003.4	0	0.000784807	NO_DIFF
FP700111.1	0.000983821	0.00772329	NO_DIFF
SRGAP2B	0.525134	0.240025	DIFF
FAM72D	0.0256931	0.00974261	NO_DIFF
LINC01145	0.00597272	0.0066495	NO_DIFF
AC241585.2	0	0.00146589	NO_DIFF
AC241585.1	0.000478291	0.000299127	NO_DIFF
AC245014.3	0.0178056	0.138595	NO_DIFF
AC245014.1	0.000391788	0.00184487	NO_DIFF
NBPF20	0.0222815	0.0181189	NO_DIFF
RF00003.7	0.000607955	0.00687257	NO_DIFF
NBPF25P	0.00356244	0.00258383	NO_DIFF
GPR89A	0.0523395	0.0285762	NO_DIFF
PDZK1	0	0.00105532	NO_DIFF
CD160	0.00215719	0.000941051	NO_DIFF
RNF115	0.515276	0.367449	NO_DIFF
POLR3C	0.206369	0.168817	NO_DIFF
NUDT17	0.0505869	0.0333726	NO_DIFF
PIAS3	0.0631988	0.0670645	NO_DIFF
ANKRD35	0.0260418	0.0274625	NO_DIFF
ITGA10	0.0506779	0.0550655	NO_DIFF
PEX11B	0.101056	0.0485193	NO_DIFF
RBM8A	1.0203	1.43518	DIFF
GNRHR2	0.017836	0.00813181	NO_DIFF
LIX1L-AS1	0.00819052	0.0116847	NO_DIFF
AC243547.3	0	6.35251e-05	NO_DIFF
LIX1L	0.184734	0.163919	NO_DIFF
ANKRD34A	0.00708952	0.0111093	NO_DIFF
AC243547.2	0	0.000104407	NO_DIFF
POLR3GL	0.414101	0.288634	NO_DIFF
TXNIP	15.6721	6.86503	DIFF
RNVU1-6	0.00294992	0.0153369	NO_DIFF
LINC01719	0.00255166	0.0010126	NO_DIFF
NBPF10	0.105708	0.115051	NO_DIFF
NOTCH2NLA	0.162089	0.079693	NO_DIFF
AC239799.1	0.0196389	0.0216443	NO_DIFF
SEC22B4P	0.00237098	0.00135967	NO_DIFF
RF00003.9	0.00198872	0.0481102	NO_DIFF
AC245407.1	0	0.000181069	NO_DIFF
HYDIN2	0	0.0002238	NO_DIFF
NBPF12	0.0841193	0.0597735	NO_DIFF
PFN1P8	0	0.000110828	NO_DIFF
AC244394.1	0.00114267	0.000585951	NO_DIFF
AC241584.1	0.00826713	0.00875093	NO_DIFF
RNVU1-8	0	0.00201291	NO_DIFF
AC241584.2	0.00159004	0	NO_DIFF
PRKAB2	0.10722	0.0592823	NO_DIFF
PDIA3P1	0.0213096	0.0304021	NO_DIFF
AC242426.2	0.00145045	0.000651054	NO_DIFF
FMO5	0.0468024	0.0231903	NO_DIFF
CCT8P1	0.00376589	0.00338967	NO_DIFF
RPL7AP15	0.00370067	0.000949485	NO_DIFF
CHD1L	0.0147503	0.0192292	NO_DIFF
LINC00624	0.0003552	0.0026371	NO_DIFF
AC242426.1	0.000454857	0.00112055	NO_DIFF
BCL9	0.0204415	0.018846	NO_DIFF
ACP6	0.0316617	0.0101595	NO_DIFF
GJA5	0.00232732	0.00100898	NO_DIFF
GPR89B	0.0395824	0.019021	NO_DIFF
AC239803.2	0.00232717	0.000496896	NO_DIFF
AC239803.3	0	0.00130309	NO_DIFF
RNVU1-7	0	0.000182544	NO_DIFF
NBPF11	0.045517	0.0571709	NO_DIFF
AC239809.3	0.00065139	0.000200763	NO_DIFF
AC239803.1	0.00133686	0.0037538	NO_DIFF
RNU1-120P	0	0.000493741	NO_DIFF
LINC01731	0	0.000330686	NO_DIFF
LINC01138	0.0235724	0.0438904	NO_DIFF
AC245100.1	0	0.000700915	NO_DIFF
MIR5087	0	0.000186917	NO_DIFF
RNU1-122P	0.00234607	0.0234369	NO_DIFF
AC245100.7	0	0.000157193	NO_DIFF
RNU1-13P	0.00112617	0.00712883	NO_DIFF
AC245100.4	0.0131025	0.0157445	NO_DIFF
RNVU1-3	0.00211375	0.00202303	NO_DIFF
AC245100.2	0.000858469	0.00185346	NO_DIFF
AC245100.8	0.0310376	0.0396121	NO_DIFF
PPIAL4G	0.00691602	0.00696228	NO_DIFF
RF00003.10	0.0106449	0.110943	NO_DIFF
NBPF14	0.336282	0.253499	NO_DIFF
AC239811.1	0	0.000293972	NO_DIFF
NUDT4B	0	0.00029265	NO_DIFF
PDE4DIP	0.598734	0.413602	NO_DIFF
AC239804.1	0	0.000356955	NO_DIFF
NBPF9	0.140127	0.0942623	NO_DIFF
AC239804.2	0	0.000227995	NO_DIFF
AC245297.3	0.132401	0.172562	NO_DIFF
AC245297.1	0.0212774	0.0130399	NO_DIFF
AC245297.2	0.00516686	0.00369108	NO_DIFF
AC242843.1	0.100178	0.0589206	NO_DIFF
AC242842.3	0.00209165	0.00107643	NO_DIFF
NBPF19	0.00641447	0.00999731	NO_DIFF
LINC00869	0.0714666	0.12841	NO_DIFF
RF00003.11	0.0043616	0.0206585	NO_DIFF
AC243772.3	0.00311355	0.00324867	NO_DIFF
AC243772.1	0	0.000268667	NO_DIFF
FCGR1A	0.339873	0.88344	DIFF
HIST2H2BF	0.066366	0.0322861	NO_DIFF
AC243772.2	0.0614492	0.0106326	NO_DIFF
HIST2H3D	0.000365399	9.93445e-05	NO_DIFF
HIST2H4A	0.0060677	0.000984907	NO_DIFF
HIST2H2BD	0.140518	0.055867	NO_DIFF
AC239868.1	0.0628423	0.0509064	NO_DIFF
HIST2H2AA4	0.0439338	0.0642104	NO_DIFF
HIST2H4B	0.00157812	0.0021042	NO_DIFF
AC239868.2	0.0139663	0.0121878	NO_DIFF
HIST2H2BE	0.126978	0.125333	NO_DIFF
HIST2H2AC	0.141255	0.153838	NO_DIFF
HIST2H2AB	0.00608034	0.00579197	NO_DIFF
BOLA1	0.0915849	0.0506972	NO_DIFF
SV2A	0.0143655	0.0115138	NO_DIFF
SF3B4	0.253325	0.397629	NO_DIFF
MTMR11	0.0161939	0.107587	NO_DIFF
OTUD7B	0.011432	0.0133202	NO_DIFF
AC244033.2	0.00549287	0.00551954	NO_DIFF
AC244033.1	0	9.13856e-05	NO_DIFF
VPS45	0.133803	0.121951	NO_DIFF
PLEKHO1	1.77647	1.71769	NO_DIFF
AC242988.2	0.0450008	0.038759	NO_DIFF
ANP32E	0.460408	0.497026	NO_DIFF
RNU2-17P	0.00288225	0.00203117	NO_DIFF
AC242988.1	0.00464193	0.00244762	NO_DIFF
CA14	0.0013092	0.00064555	NO_DIFF
APH1A	1.16347	0.634799	DIFF
C1orf54	0.28602	0.148177	NO_DIFF
CIART	0.0460869	0.00829662	NO_DIFF
MRPS21	0.958105	1.10138	NO_DIFF
PRPF3	0.170509	0.223953	NO_DIFF
RPRD2	0.2865	0.184688	NO_DIFF
TARS2	0.104526	0.102903	NO_DIFF
ECM1	0.196089	0.19749	NO_DIFF
FALEC	0.0160569	0.0105919	NO_DIFF
AL356356.1	0.0189984	0.00453703	NO_DIFF
ADAMTSL4	0.226215	0.402471	NO_DIFF
ADAMTSL4-AS1	0.106316	0.0814021	NO_DIFF
RN7SL473P	0.0716762	0.0454594	NO_DIFF
RN7SL600P	0.044064	0.0315051	NO_DIFF
MCL1	5.2842	6.21501	NO_DIFF
RF00561.1	0	0.000510202	NO_DIFF
ENSA	1.12636	1.22069	NO_DIFF
RF00015	0.00143353	0.00198244	NO_DIFF
GOLPH3L	0.0950088	0.0304843	NO_DIFF
HORMAD1	0.00851268	0.00743754	NO_DIFF
CTSS	9.68653	7.90522	DIFF
CTSK	0.0721925	0.0511195	NO_DIFF
ARNT	0.356743	0.226944	NO_DIFF
RPS27AP6	0	0.000243351	NO_DIFF
CTXND2	0.000454587	0.00052731	NO_DIFF
CYCSP51	0	0.000140564	NO_DIFF
SETDB1	0.192667	0.12956	NO_DIFF
CERS2	0.533475	0.598149	NO_DIFF
AL590133.2	0	0.000514819	NO_DIFF
AL590133.1	0.00169338	0.000944718	NO_DIFF
ANXA9	0.00378288	0.00332104	NO_DIFF
MINDY1	0.0713	0.0377182	NO_DIFF
PRUNE1	0.0718097	0.043186	NO_DIFF
BNIPL	0.026418	0.0246211	NO_DIFF
C1orf56	0.0759344	0.1401	NO_DIFF
CDC42SE1	0.805615	1.02464	NO_DIFF
MLLT11	0.110908	0.129524	NO_DIFF
GABPB2	0.214242	0.16406	NO_DIFF
RPS29P29	0.00151959	8.79977e-05	NO_DIFF
AL592424.1	0.000739377	0.00100472	NO_DIFF
SEMA6C	0.0210271	0.00523561	NO_DIFF
TNFAIP8L2	0.37656	0.256008	NO_DIFF
SCNM1	0.44451	0.33857	NO_DIFF
LYSMD1	0.00232492	0.00141781	NO_DIFF
TMOD4	0	0.000603003	NO_DIFF
VPS72	0.147041	0.145541	NO_DIFF
PIP5K1A	0.194875	0.203174	NO_DIFF
PSMD4	0.644015	0.988431	DIFF
ZNF687-AS1	0.0157978	0.0166668	NO_DIFF
ZNF687	0.095966	0.0822016	NO_DIFF
PI4KB	0.293984	0.363978	NO_DIFF
RN7SL444P	0.00233058	0.00353691	NO_DIFF
AL391069.3	0	0.00255938	NO_DIFF
RFX5	0.127304	0.0801001	NO_DIFF
AL391069.1	0.000652085	0.000549422	NO_DIFF
AL391069.2	0.0505114	0.0181199	NO_DIFF
SELENBP1	0.0392568	0.0115373	NO_DIFF
PSMB4	0.815564	1.23758	DIFF
POGZ	0.688009	0.372733	DIFF
RNY4P25	0	0.000198413	NO_DIFF
CGN	0.00207691	0.000737569	NO_DIFF
TUFT1	0.0776226	0.0574931	NO_DIFF
AL365436.2	0.0149002	0.0164025	NO_DIFF
AL365436.1	0.149615	0.0648301	NO_DIFF
SNX27	0.7445	0.631204	NO_DIFF
AL391335.1	0	0.00325475	NO_DIFF
RNU6-1062P	0	0.00019969	NO_DIFF
CELF3	0	7.47361e-05	NO_DIFF
RIIAD1	0	0.000542902	NO_DIFF
AL589765.7	0	0.000418349	NO_DIFF
AL589765.3	0.000851748	0.00155762	NO_DIFF
MRPL9	0.207169	0.166076	NO_DIFF
OAZ3	0.0392191	0.0153554	NO_DIFF
AL589765.4	0.000303314	0.00103319	NO_DIFF
AL589765.5	0.0046368	0.000123624	NO_DIFF
TDRKH	0.0237966	0.0163365	NO_DIFF
TDRKH-AS1	0.0157274	0.00326588	NO_DIFF
AL589765.6	0	0.000195953	NO_DIFF
LINGO4	0	8.61375e-05	NO_DIFF
RORC	0.000431965	0.000554042	NO_DIFF
C2CD4D	0	0.000370949	NO_DIFF
THEM4	0.146852	0.0655157	NO_DIFF
AL450992.2	0	0.0013476	NO_DIFF
KRT8P28	0.000739377	0.000916525	NO_DIFF
S100A10	7.41607	25.3489	DIFF
AL450992.1	0.00465846	0.0117667	NO_DIFF
S100A11	10.9652	31.3922	DIFF
TCHH	0.228932	0.13621	NO_DIFF
PUDPP2	0.00132972	0	NO_DIFF
RPTN	0	0.000243756	NO_DIFF
FLG-AS1	0.00289083	0.000192397	NO_DIFF
AL589986.2	0.0126068	0.000997053	NO_DIFF
FLG2	0	0.000871009	NO_DIFF
LINC01527	0	6.11523e-05	NO_DIFF
PRR9	0	8.43155e-05	NO_DIFF
LOR	0.000500388	0.000174177	NO_DIFF
PGLYRP4	0	0.00120823	NO_DIFF
S100A9	12.1539	72.9044	DIFF
S100A12	0.238626	5.84182	DIFF
S100A8	5.62523	39.2684	DIFF
S100A7	0.00113907	0.00173871	NO_DIFF
RN7SL44P	0.00310768	0.00117565	NO_DIFF
BX470102.1	0	0.000228344	NO_DIFF
S100A6	14.4067	42.2557	DIFF
[truncated: 30,986 more rows]
