# Supplementary material for: Single-Cell RNA-Seq Analysis Reveals Macrophages Are Involved in the Pathogenesis of Human Sporadic Acute Type A Aortic Dissection
Source: Biomolecules. 2023 Feb 20;13(2):399. doi: 10.3390/biom13020399 (PMC9952989; doi:10.3390/biom13020399)
Supplement: Supplementary file 1 [file biomolecules-13-00399-s001.zip › Table S9.xlsx]

## Sheet: Sheet1
Table S9. Differentially expressed gene characteristics between macrophages in AD group and normal group.
GeneID	gene_id	log2FC	Pvlaue	Qvalue	pct.1	pct.2	Description	GO	KEGG	significant
ENSG00000074800	ENO1	1.59548	0	0	0.848	0.562	enolase 1 [Source:HGNC Symbol;Acc:HGNC:3350]	GO:0000015(phosphopyruvate hydratase complex);GO:0000122(negative regulation of transcription by RNA polymerase II);GO:0000287(magnesium ion binding);GO:0000977(RNA polymerase II regulatory region sequence-specific DNA binding);GO:0001227(DNA-binding transcription repressor activity, RNA polymerase II-specific);GO:0003677(DNA binding);GO:0003723(RNA binding);GO:0004634(phosphopyruvate hydratase a…	00010(Glycolysis / Gluconeogenesis);03018(RNA degradation);04066(HIF-1 signaling pathway)	up
ENSG00000142634	EFHD2	1.22441	0	0	0.78	0.464	EF-hand domain family member D2 [Source:HGNC Symbol;Acc:HGNC:28670]	GO:0005509(calcium ion binding);GO:0016020(membrane);GO:0045121(membrane raft);GO:0045296(cadherin binding);GO:0046872(metal ion binding)	NA	up
ENSG00000173372	C1QA	-3.41699	0	0	0.206	0.96	complement C1q A chain [Source:HGNC Symbol;Acc:HGNC:1241]	GO:0001540(amyloid-beta binding);GO:0002376(immune system process);GO:0005515(protein binding);GO:0005576(extracellular region);GO:0005581(collagen trimer);GO:0005602(complement component C1 complex);GO:0005623(cell);GO:0006956(complement activation);GO:0006958(complement activation, classical pathway);GO:0007267(cell-cell signaling);GO:0007568(aging);GO:0010039(response to iron ion);GO:0016322(n…	04610(Complement and coagulation cascades);05020(Prion diseases);05133(Pertussis);05142(Chagas disease (American trypanosomiasis));05150(Staphylococcus aureus infection);05322(Systemic lupus erythematosus)	down
ENSG00000159189	C1QC	-2.70445	0	0	0.156	0.874	complement C1q C chain [Source:HGNC Symbol;Acc:HGNC:1245]	GO:0002376(immune system process);GO:0005515(protein binding);GO:0005576(extracellular region);GO:0005581(collagen trimer);GO:0005615(extracellular space);GO:0005623(cell);GO:0006955(immune response);GO:0006956(complement activation);GO:0006958(complement activation, classical pathway);GO:0030449(regulation of complement activation);GO:0030853(negative regulation of granulocyte differentiation);G…	04610(Complement and coagulation cascades);05020(Prion diseases);05133(Pertussis);05142(Chagas disease (American trypanosomiasis));05150(Staphylococcus aureus infection);05322(Systemic lupus erythematosus)	down
ENSG00000173369	C1QB	-2.94979	0	0	0.207	0.916	complement C1q B chain [Source:HGNC Symbol;Acc:HGNC:1242]	GO:0002376(immune system process);GO:0005515(protein binding);GO:0005576(extracellular region);GO:0005581(collagen trimer);GO:0005602(complement component C1 complex);GO:0005623(cell);GO:0006956(complement activation);GO:0006958(complement activation, classical pathway);GO:0030449(regulation of complement activation);GO:0042803(protein homodimerization activity);GO:0045087(innate immune response)…	04610(Complement and coagulation cascades);05020(Prion diseases);05133(Pertussis);05142(Chagas disease (American trypanosomiasis));05150(Staphylococcus aureus infection);05322(Systemic lupus erythematosus)	down
ENSG00000142669	SH3BGRL3	1.62179	0	0	0.988	0.902	SH3 domain binding glutamate rich protein like 3 [Source:HGNC Symbol;Acc:HGNC:15568]	GO:0005634(nucleus);GO:0005737(cytoplasm);GO:0009055(electron transfer activity);GO:0015035(protein disulfide oxidoreductase activity);GO:0016604(nuclear body);GO:0022900(electron transport chain);GO:0045454(cell redox homeostasis);GO:0055114(oxidation-reduction process);GO:0070062(extracellular exosome)	NA	up
ENSG00000169442	CD52	1.84467	0	0	0.497	0.081	CD52 molecule [Source:HGNC Symbol;Acc:HGNC:1804]	GO:0005576(extracellular region);GO:0005886(plasma membrane);GO:0007204(positive regulation of cytosolic calcium ion concentration);GO:0016020(membrane);GO:0016021(integral component of membrane);GO:0031225(anchored component of membrane);GO:0031226(intrinsic component of plasma membrane);GO:0045730(respiratory burst);GO:0097225(sperm midpiece)	NA	up
ENSG00000162511	LAPTM5	0.713889	0	0	0.956	0.915	lysosomal protein transmembrane 5 [Source:HGNC Symbol;Acc:HGNC:29612]	GO:0005515(protein binding);GO:0005764(lysosome);GO:0005765(lysosomal membrane);GO:0005887(integral component of plasma membrane);GO:0016020(membrane);GO:0016021(integral component of membrane);GO:1990830(cellular response to leukemia inhibitory factor)	04142(Lysosome)	up
ENSG00000265972	TXNIP	-1.08391	0	0	0.738	0.934	thioredoxin interacting protein [Source:HGNC Symbol;Acc:HGNC:16952]	GO:0000122(negative regulation of transcription by RNA polymerase II);GO:0004857(enzyme inhibitor activity);GO:0005515(protein binding);GO:0005634(nucleus);GO:0005737(cytoplasm);GO:0005758(mitochondrial intermembrane space);GO:0005829(cytosol);GO:0006606(protein import into nucleus);GO:0006979(response to oxidative stress);GO:0007049(cell cycle);GO:0009612(response to mechanical stimulus);GO:0009…	04621(NOD-like receptor signaling pathway)	down
ENSG00000197747	S100A10	1.64652	0	0	0.953	0.759	S100 calcium binding protein A10 [Source:HGNC Symbol;Acc:HGNC:10487]	GO:0001765(membrane raft assembly);GO:0005509(calcium ion binding);GO:0005515(protein binding);GO:0005576(extracellular region);GO:0005783(endoplasmic reticulum);GO:0006900(vesicle budding from membrane);GO:0019897(extrinsic component of plasma membrane);GO:0042493(response to drug);GO:0042803(protein homodimerization activity);GO:0043547(positive regulation of GTPase activity);GO:0044325(ion cha…	NA	up
ENSG00000163191	S100A11	1.4368	0	0	0.986	0.907	S100 calcium binding protein A11 [Source:HGNC Symbol;Acc:HGNC:10488]	GO:0001726(ruffle);GO:0005509(calcium ion binding);GO:0005515(protein binding);GO:0005576(extracellular region);GO:0005615(extracellular space);GO:0005634(nucleus);GO:0005737(cytoplasm);GO:0005913(cell-cell adherens junction);GO:0007165(signal transduction);GO:0008156(negative regulation of DNA replication);GO:0008285(negative regulation of cell population proliferation);GO:0034774(secretory gran…	NA	up
ENSG00000163220	S100A9	2.49017	0	0	0.888	0.722	S100 calcium binding protein A9 [Source:HGNC Symbol;Acc:HGNC:10499]	GO:0001816(cytokine production);GO:0002224(toll-like receptor signaling pathway);GO:0002376(immune system process);GO:0002523(leukocyte migration involved in inflammatory response);GO:0005509(calcium ion binding);GO:0005515(protein binding);GO:0005576(extracellular region);GO:0005615(extracellular space);GO:0005634(nucleus);GO:0005654(nucleoplasm);GO:0005737(cytoplasm);GO:0005829(cytosol);GO:0005…	04657(IL-17 signaling pathway)	up
ENSG00000163221	S100A12	2.46564	0	0	0.355	0.034	S100 calcium binding protein A12 [Source:HGNC Symbol;Acc:HGNC:10489]	GO:0002376(immune system process);GO:0002548(monocyte chemotaxis);GO:0005507(copper ion binding);GO:0005509(calcium ion binding);GO:0005515(protein binding);GO:0005576(extracellular region);GO:0005634(nucleus);GO:0005737(cytoplasm);GO:0005829(cytosol);GO:0005856(cytoskeleton);GO:0005886(plasma membrane);GO:0006805(xenobiotic metabolic process);GO:0006954(inflammatory response);GO:0008270(zinc ion…	NA	up
ENSG00000143546	S100A8	2.60361	0	0	0.741	0.391	S100 calcium binding protein A8 [Source:HGNC Symbol;Acc:HGNC:10498]	GO:0001816(cytokine production);GO:0002224(toll-like receptor signaling pathway);GO:0002376(immune system process);GO:0002523(leukocyte migration involved in inflammatory response);GO:0002526(acute inflammatory response);GO:0002544(chronic inflammatory response);GO:0002793(positive regulation of peptide secretion);GO:0005509(calcium ion binding);GO:0005515(protein binding);GO:0005576(extracellula…	04657(IL-17 signaling pathway)	up
ENSG00000197956	S100A6	1.48933	0	0	0.982	0.875	S100 calcium binding protein A6 [Source:HGNC Symbol;Acc:HGNC:10496]	GO:0001726(ruffle);GO:0005509(calcium ion binding);GO:0005515(protein binding);GO:0005523(tropomyosin binding);GO:0005576(extracellular region);GO:0005634(nucleus);GO:0005635(nuclear envelope);GO:0005737(cytoplasm);GO:0005829(cytosol);GO:0005886(plasma membrane);GO:0007165(signal transduction);GO:0007409(axonogenesis);GO:0008270(zinc ion binding);GO:0015075(ion transmembrane transporter activity)…	NA	up
ENSG00000143162	CREG1	-0.968314	0	0	0.431	0.701	cellular repressor of E1A stimulated genes 1 [Source:HGNC Symbol;Acc:HGNC:2351]	GO:0003714(transcription corepressor activity);GO:0005576(extracellular region);GO:0005615(extracellular space);GO:0005667(transcription factor complex);GO:0006355(regulation of transcription, DNA-templated);GO:0006357(regulation of transcription by RNA polymerase II);GO:0007275(multicellular organism development);GO:0008134(transcription factor binding);GO:0035578(azurophil granule lumen);GO:004…	NA	down
ENSG00000198771	RCSD1	-0.895033	0	0	0.137	0.45	RCSD domain containing 1 [Source:HGNC Symbol;Acc:HGNC:28310]	GO:0003009(skeletal muscle contraction);GO:0005884(actin filament);GO:0051015(actin filament binding);GO:0071474(cellular hyperosmotic response)	NA	down
ENSG00000159388	BTG2	-1.03252	0	0	0.275	0.584	BTG anti-proliferation factor 2 [Source:HGNC Symbol;Acc:HGNC:1131]	GO:0000122(negative regulation of transcription by RNA polymerase II);GO:0001227(DNA-binding transcription repressor activity, RNA polymerase II-specific);GO:0005515(protein binding);GO:0005634(nucleus);GO:0005737(cytoplasm);GO:0005829(cytosol);GO:0006281(DNA repair);GO:0006479(protein methylation);GO:0006974(cellular response to DNA damage stimulus);GO:0006977(DNA damage response, signal transdu…	03018(RNA degradation)	down
ENSG00000123689	G0S2	2.25965	0	0	0.51	0.127	G0/G1 switch 2 [Source:HGNC Symbol;Acc:HGNC:30229]	GO:0003674(molecular_function);GO:0005515(protein binding);GO:0005739(mitochondrion);GO:0005811(lipid droplet);GO:0006915(apoptotic process);GO:0019216(regulation of lipid metabolic process);GO:0097191(extrinsic apoptotic signaling pathway);GO:0120162(positive regulation of cold-induced thermogenesis);GO:2001238(positive regulation of extrinsic apoptotic signaling pathway)	NA	up
ENSG00000163041	H3F3A	0.884239	0	0	0.923	0.848	H3 histone family member 3A [Source:HGNC Symbol;Acc:HGNC:4764]	GO:0000183(chromatin silencing at rDNA);GO:0000228(nuclear chromosome);GO:0000784(nuclear chromosome, telomeric region);GO:0000786(nucleosome);GO:0000788(nuclear nucleosome);GO:0000979(RNA polymerase II core promoter sequence-specific DNA binding);GO:0000980(RNA polymerase II distal enhancer sequence-specific DNA binding);GO:0001649(osteoblast differentiation);GO:0001740(Barr body);GO:0003677(DNA…	05034(Alcoholism);05202(Transcriptional misregulation in cancer);05322(Systemic lupus erythematosus)	up
ENSG00000152518	ZFP36L2	-1.04861	0	0	0.595	0.856	ZFP36 ring finger protein like 2 [Source:HGNC Symbol;Acc:HGNC:1108]	GO:0000165(MAPK cascade);GO:0000288(nuclear-transcribed mRNA catabolic process, deadenylation-dependent decay);GO:0000981(DNA-binding transcription factor activity, RNA polymerase II-specific);GO:0003677(DNA binding);GO:0003700(DNA-binding transcription factor activity);GO:0003723(RNA binding);GO:0003730(mRNA 3'-UTR binding);GO:0005515(protein binding);GO:0005634(nucleus);GO:0005737(cytoplasm);GO…	04218(Cellular senescence)	down
ENSG00000211592	IGKC	-1.60884	0	0	0.141	0.496	immunoglobulin kappa constant [Source:HGNC Symbol;Acc:HGNC:5716]	NA	NA	down
ENSG00000125538	IL1B	1.58937	0	0	0.661	0.32	interleukin 1 beta [Source:HGNC Symbol;Acc:HGNC:5992]	GO:0000165(MAPK cascade);GO:0000187(activation of MAPK activity);GO:0001660(fever generation);GO:0001934(positive regulation of protein phosphorylation);GO:0002711(positive regulation of T cell mediated immunity);GO:0005125(cytokine activity);GO:0005149(interleukin-1 receptor binding);GO:0005178(integrin binding);GO:0005515(protein binding);GO:0005576(extracellular region);GO:0005615(extracellula…	01523(Antifolate resistance);04010(MAPK signaling pathway);04060(Cytokine-cytokine receptor interaction);04064(NF-kappa B signaling pathway);04217(Necroptosis);04380(Osteoclast differentiation);04620(Toll-like receptor signaling pathway);04621(NOD-like receptor signaling pathway);04623(Cytosolic DNA-sensing pathway);04625(C-type lectin receptor signaling pathway);04640(Hematopoietic cell lineage)…	up
ENSG00000019169	MARCO	1.48074	0	0	0.66	0.289	macrophage receptor with collagenous structure [Source:HGNC Symbol;Acc:HGNC:6895]	GO:0001540(amyloid-beta binding);GO:0001664(G protein-coupled receptor binding);GO:0001934(positive regulation of protein phosphorylation);GO:0002221(pattern recognition receptor signaling pathway);GO:0002376(immune system process);GO:0004888(transmembrane signaling receptor activity);GO:0005044(scavenger receptor activity);GO:0005581(collagen trimer);GO:0005737(cytoplasm);GO:0005886(plasma membr…	04145(Phagosome)	up
ENSG00000136732	GYPC	-1.56086	0	0	0.243	0.631	glycophorin C (Gerbich blood group) [Source:HGNC Symbol;Acc:HGNC:4704]	GO:0005515(protein binding);GO:0005886(plasma membrane);GO:0005887(integral component of plasma membrane);GO:0016020(membrane);GO:0016021(integral component of membrane);GO:0019897(extrinsic component of plasma membrane);GO:0030863(cortical cytoskeleton);GO:0050900(leukocyte migration)	05144(Malaria)	down
ENSG00000241399	CD302	-1.31113	0	0	0.202	0.683	CD302 molecule [Source:HGNC Symbol;Acc:HGNC:30843]	GO:0005737(cytoplasm);GO:0005902(microvillus);GO:0005938(cell cortex);GO:0006909(phagocytosis);GO:0016020(membrane);GO:0016021(integral component of membrane);GO:0030175(filopodium);GO:0030246(carbohydrate binding);GO:0042995(cell projection)	NA	down
ENSG00000155657	TTN	-1.98774	0	0	0.017	0.343	titin [Source:HGNC Symbol;Acc:HGNC:12403]	GO:0000166(nucleotide binding);GO:0000794(condensed nuclear chromosome);GO:0002020(protease binding);GO:0002576(platelet degranulation);GO:0003300(cardiac muscle hypertrophy);GO:0004672(protein kinase activity);GO:0004674(protein serine/threonine kinase activity);GO:0004713(protein tyrosine kinase activity);GO:0005509(calcium ion binding);GO:0005515(protein binding);GO:0005516(calmodulin binding)…	05410(Hypertrophic cardiomyopathy (HCM));05414(Dilated cardiomyopathy (DCM))	down
ENSG00000138449	SLC40A1	-2.72383	0	0	0.033	0.591	solute carrier family 40 member 1 [Source:HGNC Symbol;Acc:HGNC:10909]	GO:0002260(lymphocyte homeostasis);GO:0003158(endothelium development);GO:0005381(iron ion transmembrane transporter activity);GO:0005515(protein binding);GO:0005654(nucleoplasm);GO:0005737(cytoplasm);GO:0005829(cytosol);GO:0005886(plasma membrane);GO:0005887(integral component of plasma membrane);GO:0006811(ion transport);GO:0006826(iron ion transport);GO:0006879(cellular iron ion homeostasis);G…	04216(Ferroptosis);04978(Mineral absorption)	down
ENSG00000115414	FN1	3.00401	0	0	0.579	0.251	fibronectin 1 [Source:HGNC Symbol;Acc:HGNC:3778]	GO:0001525(angiogenesis);GO:0001932(regulation of protein phosphorylation);GO:0002020(protease binding);GO:0002576(platelet degranulation);GO:0005102(signaling receptor binding);GO:0005178(integrin binding);GO:0005201(extracellular matrix structural constituent);GO:0005515(protein binding);GO:0005518(collagen binding);GO:0005576(extracellular region);GO:0005577(fibrinogen complex);GO:0005604(base…	04151(PI3K-Akt signaling pathway);04510(Focal adhesion);04512(ECM-receptor interaction);04810(Regulation of actin cytoskeleton);04933(AGE-RAGE signaling pathway in diabetic complications);05100(Bacterial invasion of epithelial cells);05146(Amoebiasis);05165(Human papillomavirus infection);05200(Pathways in cancer);05205(Proteoglycans in cancer);05222(Small cell lung cancer)	up
ENSG00000018280	SLC11A1	1.09272	0	0	0.727	0.428	solute carrier family 11 member 1 [Source:HGNC Symbol;Acc:HGNC:10907]	GO:0001818(negative regulation of cytokine production);GO:0001819(positive regulation of cytokine production);GO:0002309(T cell proliferation involved in immune response);GO:0002369(T cell cytokine production);GO:0002606(positive regulation of dendritic cell antigen processing and presentation);GO:0002827(positive regulation of T-helper 1 type immune response);GO:0003674(molecular_function);GO:00…	04142(Lysosome)	up
ENSG00000115009	CCL20	2.9851	0	0	0.582	0.059	C-C motif chemokine ligand 20 [Source:HGNC Symbol;Acc:HGNC:10619]	GO:0002548(monocyte chemotaxis);GO:0005125(cytokine activity);GO:0005515(protein binding);GO:0005576(extracellular region);GO:0005615(extracellular space);GO:0006935(chemotaxis);GO:0006954(inflammatory response);GO:0006955(immune response);GO:0007165(signal transduction);GO:0007186(G protein-coupled receptor signaling pathway);GO:0007267(cell-cell signaling);GO:0008009(chemokine activity);GO:0010…	04060(Cytokine-cytokine receptor interaction);04062(Chemokine signaling pathway);04657(IL-17 signaling pathway);04668(TNF signaling pathway);05323(Rheumatoid arthritis)	up
ENSG00000206560	ANKRD28	1.12859	0	0	0.367	0.055	ankyrin repeat domain 28 [Source:HGNC Symbol;Acc:HGNC:29024]	GO:0000139(Golgi membrane);GO:0005515(protein binding);GO:0005634(nucleus);GO:0005654(nucleoplasm);GO:0005829(cytosol);GO:0048208(COPII vesicle coating)	NA	up
ENSG00000010327	STAB1	-1.10406	0	0	0.6	0.867	stabilin 1 [Source:HGNC Symbol;Acc:HGNC:18628]	GO:0005041(low-density lipoprotein particle receptor activity);GO:0005044(scavenger receptor activity);GO:0005509(calcium ion binding);GO:0005515(protein binding);GO:0005540(hyaluronic acid binding);GO:0005886(plasma membrane);GO:0005887(integral component of plasma membrane);GO:0006898(receptor-mediated endocytosis);GO:0006954(inflammatory response);GO:0007155(cell adhesion);GO:0007267(cell-cell…	NA	down
ENSG00000114541	FRMD4B	-1.09535	0	0	0.219	0.586	FERM domain containing 4B [Source:HGNC Symbol;Acc:HGNC:24886]	GO:0001726(ruffle);GO:0005615(extracellular space);GO:0005737(cytoplasm);GO:0005856(cytoskeleton);GO:0005912(adherens junction);GO:0005923(bicellular tight junction);GO:0030054(cell junction);GO:0090162(establishment of epithelial cell polarity)	NA	down
ENSG00000168386	FILIP1L	-1.24773	0	0	0.139	0.483	filamin A interacting protein 1 like [Source:HGNC Symbol;Acc:HGNC:24589]	GO:0003674(molecular_function);GO:0005634(nucleus);GO:0005737(cytoplasm);GO:0008150(biological_process);GO:0016020(membrane)	NA	down
ENSG00000173230	GOLGB1	-1.0311	0	0	0.308	0.611	golgin B1 [Source:HGNC Symbol;Acc:HGNC:4429]	GO:0000139(Golgi membrane);GO:0003700(DNA-binding transcription factor activity);GO:0003723(RNA binding);GO:0005515(protein binding);GO:0005793(endoplasmic reticulum-Golgi intermediate compartment);GO:0005794(Golgi apparatus);GO:0005795(Golgi stack);GO:0005801(cis-Golgi network);GO:0006355(regulation of transcription, DNA-templated);GO:0006888(endoplasmic reticulum to Golgi vesicle-mediated trans…	NA	down
ENSG00000168214	RBPJ	-1.32423	0	0	0.508	0.828	recombination signal binding protein for immunoglobulin kappa J region [Source:HGNC Symbol;Acc:HGNC:5724]	GO:0000122(negative regulation of transcription by RNA polymerase II);GO:0000978(RNA polymerase II proximal promoter sequence-specific DNA binding);GO:0000981(DNA-binding transcription factor activity, RNA polymerase II-specific);GO:0001103(RNA polymerase II repressing transcription factor binding);GO:0001228(DNA-binding transcription activator activity, RNA polymerase II-specific);GO:0001525(ang…	04330(Notch signaling pathway);04658(Th1 and Th2 cell differentiation);05165(Human papillomavirus infection);05169(Epstein-Barr virus infection);05203(Viral carcinogenesis)	down
ENSG00000169429	CXCL8	2.16646	0	0	0.722	0.429	C-X-C motif chemokine ligand 8 [Source:HGNC Symbol;Acc:HGNC:6025]	GO:0001525(angiogenesis);GO:0002237(response to molecule of bacterial origin);GO:0005125(cytokine activity);GO:0005153(interleukin-8 receptor binding);GO:0005515(protein binding);GO:0005576(extracellular region);GO:0005615(extracellular space);GO:0006935(chemotaxis);GO:0006952(defense response);GO:0006954(inflammatory response);GO:0006955(immune response);GO:0007050(cell cycle arrest);GO:0007165(…	04060(Cytokine-cytokine receptor interaction);04062(Chemokine signaling pathway);04064(NF-kappa B signaling pathway);04072(Phospholipase D signaling pathway);04218(Cellular senescence);04620(Toll-like receptor signaling pathway);04621(NOD-like receptor signaling pathway);04622(RIG-I-like receptor signaling pathway);04657(IL-17 signaling pathway);04932(Non-alcoholic fatty liver disease (NAFLD));04…	up
ENSG00000124882	EREG	2.42609	0	0	0.651	0.179	epiregulin [Source:HGNC Symbol;Acc:HGNC:3443]	GO:0000165(MAPK cascade);GO:0001525(angiogenesis);GO:0001550(ovarian cumulus expansion);GO:0001556(oocyte maturation);GO:0001819(positive regulation of cytokine production);GO:0005154(epidermal growth factor receptor binding);GO:0005515(protein binding);GO:0005576(extracellular region);GO:0005615(extracellular space);GO:0005886(plasma membrane);GO:0005887(integral component of plasma membrane);GO…	04010(MAPK signaling pathway);04012(ErbB signaling pathway);04151(PI3K-Akt signaling pathway);05210(Colorectal cancer)	up
ENSG00000118785	SPP1	4.32837	0	0	0.6	0.101	secreted phosphoprotein 1 [Source:HGNC Symbol;Acc:HGNC:11255]	GO:0001503(ossification);GO:0001649(osteoblast differentiation);GO:0005125(cytokine activity);GO:0005515(protein binding);GO:0005576(extracellular region);GO:0005615(extracellular space);GO:0005788(endoplasmic reticulum lumen);GO:0005794(Golgi apparatus);GO:0006710(androgen catabolic process);GO:0006954(inflammatory response);GO:0007155(cell adhesion);GO:0007566(embryo implantation);GO:0010033(re…	04151(PI3K-Akt signaling pathway);04371(Apelin signaling pathway);04510(Focal adhesion);04512(ECM-receptor interaction);04620(Toll-like receptor signaling pathway);05165(Human papillomavirus infection)	up
ENSG00000138821	SLC39A8	1.34411	0	0	0.441	0.125	solute carrier family 39 member 8 [Source:HGNC Symbol;Acc:HGNC:20862]	GO:0005385(zinc ion transmembrane transporter activity);GO:0005886(plasma membrane);GO:0005887(integral component of plasma membrane);GO:0006811(ion transport);GO:0006829(zinc ion transport);GO:0006882(cellular zinc ion homeostasis);GO:0016020(membrane);GO:0016021(integral component of membrane);GO:0030001(metal ion transport);GO:0031090(organelle membrane);GO:0046873(metal ion transmembrane tran…	04216(Ferroptosis)	up
ENSG00000250722	SELENOP	-3.7279	0	0	0.085	0.885	selenoprotein P [Source:HGNC Symbol;Acc:HGNC:10751]	GO:0001887(selenium compound metabolic process);GO:0002576(platelet degranulation);GO:0005576(extracellular region);GO:0005615(extracellular space);GO:0006979(response to oxidative stress);GO:0007420(brain development);GO:0007626(locomotory behavior);GO:0008430(selenium binding);GO:0009791(post-embryonic development);GO:0010269(response to selenium ion);GO:0016020(membrane);GO:0016021(integral co…	NA	down
ENSG00000145703	IQGAP2	-1.18375	0	0	0.19	0.568	IQ motif containing GTPase activating protein 2 [Source:HGNC Symbol;Acc:HGNC:6111]	GO:0003779(actin binding);GO:0005095(GTPase inhibitor activity);GO:0005515(protein binding);GO:0005516(calmodulin binding);GO:0005547(phosphatidylinositol-3,4,5-trisphosphate binding);GO:0005737(cytoplasm);GO:0005829(cytosol);GO:0005886(plasma membrane);GO:0005902(microvillus);GO:0007165(signal transduction);GO:0009986(cell surface);GO:0015629(actin cytoskeleton);GO:0017048(Rho GTPase binding);GO…	04810(Regulation of actin cytoskeleton)	down
ENSG00000038427	VCAN	2.99444	0	0	0.895	0.297	versican [Source:HGNC Symbol;Acc:HGNC:2464]	GO:0001501(skeletal system development);GO:0001649(osteoblast differentiation);GO:0005509(calcium ion binding);GO:0005515(protein binding);GO:0005539(glycosaminoglycan binding);GO:0005540(hyaluronic acid binding);GO:0005576(extracellular region);GO:0005615(extracellular space);GO:0005788(endoplasmic reticulum lumen);GO:0005796(Golgi lumen);GO:0007155(cell adhesion);GO:0007275(multicellular organi…	04514(Cell adhesion molecules (CAMs))	up
ENSG00000248323	LUCAT1	1.40975	0	0	0.653	0.249	lung cancer associated transcript 1 [Source:HGNC Symbol;Acc:HGNC:48498]	NA	NA	up
ENSG00000120708	TGFBI	1.34598	0	0	0.759	0.584	transforming growth factor beta induced [Source:HGNC Symbol;Acc:HGNC:11771]	GO:0001525(angiogenesis);GO:0002062(chondrocyte differentiation);GO:0005178(integrin binding);GO:0005201(extracellular matrix structural constituent);GO:0005515(protein binding);GO:0005518(collagen binding);GO:0005576(extracellular region);GO:0005604(basement membrane);GO:0005615(extracellular space);GO:0005802(trans-Golgi network);GO:0005886(plasma membrane);GO:0007155(cell adhesion);GO:0007162(…	NA	up
ENSG00000120738	EGR1	-1.37852	0	0	0.334	0.736	early growth response 1 [Source:HGNC Symbol;Acc:HGNC:3238]	GO:0000122(negative regulation of transcription by RNA polymerase II);GO:0000976(transcription regulatory region sequence-specific DNA binding);GO:0000977(RNA polymerase II regulatory region sequence-specific DNA binding);GO:0000981(DNA-binding transcription factor activity, RNA polymerase II-specific);GO:0001228(DNA-binding transcription activator activity, RNA polymerase II-specific);GO:0001666…	04371(Apelin signaling pathway);04912(GnRH signaling pathway);04928(Parathyroid hormone synthesis, secretion and action);04933(AGE-RAGE signaling pathway in diabetic complications);05020(Prion diseases);05166(Human T-cell leukemia virus 1 infection)	down
ENSG00000019582	CD74	-2.06197	0	0	0.691	0.984	CD74 molecule [Source:HGNC Symbol;Acc:HGNC:1697]	GO:0000139(Golgi membrane);GO:0000187(activation of MAPK activity);GO:0001516(prostaglandin biosynthetic process);GO:0001540(amyloid-beta binding);GO:0001934(positive regulation of protein phosphorylation);GO:0001961(positive regulation of cytokine-mediated signaling pathway);GO:0002250(adaptive immune response);GO:0002376(immune system process);GO:0002606(positive regulation of dendritic cell an…	04612(Antigen processing and presentation);05152(Tuberculosis);05168(Herpes simplex virus 1 infection)	down
ENSG00000124491	F13A1	-2.30388	0	0	0.177	0.799	coagulation factor XIII A chain [Source:HGNC Symbol;Acc:HGNC:3531]	GO:0002576(platelet degranulation);GO:0003810(protein-glutamine gamma-glutamyltransferase activity);GO:0005576(extracellular region);GO:0005737(cytoplasm);GO:0007596(blood coagulation);GO:0007599(hemostasis);GO:0016740(transferase activity);GO:0016746(transferase activity, transferring acyl groups);GO:0018149(peptide cross-linking);GO:0019221(cytokine-mediated signaling pathway);GO:0031093(platel…	04610(Complement and coagulation cascades)	down
ENSG00000213719	CLIC1	0.866616	0	0	0.869	0.744	chloride intracellular channel 1 [Source:HGNC Symbol;Acc:HGNC:2062]	GO:0005244(voltage-gated ion channel activity);GO:0005254(chloride channel activity);GO:0005515(protein binding);GO:0005615(extracellular space);GO:0005634(nucleus);GO:0005635(nuclear envelope);GO:0005737(cytoplasm);GO:0005739(mitochondrion);GO:0005886(plasma membrane);GO:0005903(brush border);GO:0006811(ion transport);GO:0006821(chloride transport);GO:0007165(signal transduction);GO:0016020(memb…	NA	up
ENSG00000204389	HSPA1A	-0.88954	0	0	0.735	0.968	heat shock protein family A (Hsp70) member 1A [Source:HGNC Symbol;Acc:HGNC:5232]	GO:0000151(ubiquitin ligase complex);GO:0000166(nucleotide binding);GO:0001618(virus receptor activity);GO:0001664(G protein-coupled receptor binding);GO:0003714(transcription corepressor activity);GO:0003723(RNA binding);GO:0005102(signaling receptor binding);GO:0005515(protein binding);GO:0005524(ATP binding);GO:0005576(extracellular region);GO:0005634(nucleus);GO:0005654(nucleoplasm);GO:000573…	03040(Spliceosome);04010(MAPK signaling pathway);04141(Protein processing in endoplasmic reticulum);04144(Endocytosis);04213(Longevity regulating pathway - multiple species);04612(Antigen processing and presentation);04915(Estrogen signaling pathway);05020(Prion diseases);05134(Legionellosis);05145(Toxoplasmosis);05162(Measles);05164(Influenza A)	down
ENSG00000204388	HSPA1B	-1.06356	0	0	0.585	0.897	heat shock protein family A (Hsp70) member 1B [Source:HGNC Symbol;Acc:HGNC:5233]	GO:0000151(ubiquitin ligase complex);GO:0000166(nucleotide binding);GO:0001618(virus receptor activity);GO:0001664(G protein-coupled receptor binding);GO:0003723(RNA binding);GO:0005102(signaling receptor binding);GO:0005515(protein binding);GO:0005524(ATP binding);GO:0005576(extracellular region);GO:0005634(nucleus);GO:0005654(nucleoplasm);GO:0005737(cytoplasm);GO:0005739(mitochondrion);GO:00057…	03040(Spliceosome);04010(MAPK signaling pathway);04141(Protein processing in endoplasmic reticulum);04144(Endocytosis);04213(Longevity regulating pathway - multiple species);04612(Antigen processing and presentation);04915(Estrogen signaling pathway);05134(Legionellosis);05145(Toxoplasmosis);05162(Measles);05164(Influenza A)	down
ENSG00000204287	HLA-DRA	-1.18012	0	0	0.672	0.939	major histocompatibility complex, class II, DR alpha [Source:HGNC Symbol;Acc:HGNC:4947]	GO:0000139(Golgi membrane);GO:0002376(immune system process);GO:0002503(peptide antigen assembly with MHC class II protein complex);GO:0002504(antigen processing and presentation of peptide or polysaccharide antigen via MHC class II);GO:0002506(polysaccharide assembly with MHC class II protein complex);GO:0005515(protein binding);GO:0005764(lysosome);GO:0005765(lysosomal membrane);GO:0005768(endo…	04145(Phagosome);04514(Cell adhesion molecules (CAMs));04612(Antigen processing and presentation);04640(Hematopoietic cell lineage);04658(Th1 and Th2 cell differentiation);04659(Th17 cell differentiation);04672(Intestinal immune network for IgA production);04940(Type I diabetes mellitus);05140(Leishmaniasis);05145(Toxoplasmosis);05150(Staphylococcus aureus infection);05152(Tuberculosis);05164(Inf…	down
ENSG00000179344	HLA-DQB1	-1.11411	0	0	0.199	0.547	major histocompatibility complex, class II, DQ beta 1 [Source:HGNC Symbol;Acc:HGNC:4944]	GO:0002376(immune system process);GO:0002504(antigen processing and presentation of peptide or polysaccharide antigen via MHC class II);GO:0006955(immune response);GO:0016020(membrane);GO:0016021(integral component of membrane);GO:0019882(antigen processing and presentation);GO:0042613(MHC class II protein complex)	04145(Phagosome);04514(Cell adhesion molecules (CAMs));04612(Antigen processing and presentation);04640(Hematopoietic cell lineage);04658(Th1 and Th2 cell differentiation);04659(Th17 cell differentiation);04672(Intestinal immune network for IgA production);04940(Type I diabetes mellitus);05140(Leishmaniasis);05145(Toxoplasmosis);05150(Staphylococcus aureus infection);05152(Tuberculosis);05164(Inf…	down
ENSG00000242574	HLA-DMB	-0.926711	0	0	0.102	0.417	major histocompatibility complex, class II, DM beta [Source:HGNC Symbol;Acc:HGNC:4935]	GO:0002376(immune system process);GO:0002399(MHC class II protein complex assembly);GO:0002503(peptide antigen assembly with MHC class II protein complex);GO:0002504(antigen processing and presentation of peptide or polysaccharide antigen via MHC class II);GO:0005515(protein binding);GO:0005764(lysosome);GO:0005765(lysosomal membrane);GO:0005768(endosome);GO:0006955(immune response);GO:0016020(me…	04145(Phagosome);04514(Cell adhesion molecules (CAMs));04612(Antigen processing and presentation);04640(Hematopoietic cell lineage);04658(Th1 and Th2 cell differentiation);04659(Th17 cell differentiation);04672(Intestinal immune network for IgA production);04940(Type I diabetes mellitus);05140(Leishmaniasis);05145(Toxoplasmosis);05150(Staphylococcus aureus infection);05152(Tuberculosis);05164(Inf…	down
ENSG00000231389	HLA-DPA1	-1.46428	0	0	0.371	0.756	major histocompatibility complex, class II, DP alpha 1 [Source:HGNC Symbol;Acc:HGNC:4938]	GO:0000139(Golgi membrane);GO:0002376(immune system process);GO:0002504(antigen processing and presentation of peptide or polysaccharide antigen via MHC class II);GO:0005764(lysosome);GO:0005765(lysosomal membrane);GO:0005768(endosome);GO:0005783(endoplasmic reticulum);GO:0005789(endoplasmic reticulum membrane);GO:0005794(Golgi apparatus);GO:0005886(plasma membrane);GO:0005887(integral component …	04145(Phagosome);04514(Cell adhesion molecules (CAMs));04612(Antigen processing and presentation);04640(Hematopoietic cell lineage);04658(Th1 and Th2 cell differentiation);04659(Th17 cell differentiation);04672(Intestinal immune network for IgA production);04940(Type I diabetes mellitus);05140(Leishmaniasis);05145(Toxoplasmosis);05150(Staphylococcus aureus infection);05152(Tuberculosis);05164(Inf…	down
ENSG00000223865	HLA-DPB1	-1.52338	0	0	0.301	0.719	major histocompatibility complex, class II, DP beta 1 [Source:HGNC Symbol;Acc:HGNC:4940]	GO:0000139(Golgi membrane);GO:0002376(immune system process);GO:0002504(antigen processing and presentation of peptide or polysaccharide antigen via MHC class II);GO:0005764(lysosome);GO:0005765(lysosomal membrane);GO:0005768(endosome);GO:0005783(endoplasmic reticulum);GO:0005789(endoplasmic reticulum membrane);GO:0005794(Golgi apparatus);GO:0005886(plasma membrane);GO:0006955(immune response);GO…	04145(Phagosome);04514(Cell adhesion molecules (CAMs));04612(Antigen processing and presentation);04640(Hematopoietic cell lineage);04658(Th1 and Th2 cell differentiation);04659(Th17 cell differentiation);04672(Intestinal immune network for IgA production);04940(Type I diabetes mellitus);05140(Leishmaniasis);05145(Toxoplasmosis);05150(Staphylococcus aureus infection);05152(Tuberculosis);05164(Inf…	down
ENSG00000096060	FKBP5	-1.18714	0	0	0.501	0.864	FKBP prolyl isomerase 5 [Source:HGNC Symbol;Acc:HGNC:3721]	GO:0000413(protein peptidyl-prolyl isomerization);GO:0003755(peptidyl-prolyl cis-trans isomerase activity);GO:0005515(protein binding);GO:0005528(FK506 binding);GO:0005634(nucleus);GO:0005654(nucleoplasm);GO:0005737(cytoplasm);GO:0005829(cytosol);GO:0006457(protein folding);GO:0009617(response to bacterium);GO:0016020(membrane);GO:0016853(isomerase activity);GO:0031072(heat shock protein binding)…	04915(Estrogen signaling pathway)	down
ENSG00000146122	DAAM2	-0.603606	0	0	0.006	0.188	dishevelled associated activator of morphogenesis 2 [Source:HGNC Symbol;Acc:HGNC:18143]	GO:0003779(actin binding);GO:0007368(determination of left/right symmetry);GO:0016043(cellular component organization);GO:0016055(Wnt signaling pathway);GO:0017048(Rho GTPase binding);GO:0021516(dorsal spinal cord development);GO:0030036(actin cytoskeleton organization);GO:0048715(negative regulation of oligodendrocyte differentiation);GO:0060828(regulation of canonical Wnt signaling pathway);GO:…	04310(Wnt signaling pathway)	down
ENSG00000080546	SESN1	-1.16422	0	0	0.099	0.465	sestrin 1 [Source:HGNC Symbol;Acc:HGNC:21595]	GO:0001650(fibrillar center);GO:0005515(protein binding);GO:0005634(nucleus);GO:0005737(cytoplasm);GO:0005829(cytosol);GO:0016239(positive regulation of macroautophagy);GO:0016491(oxidoreductase activity);GO:0016684(oxidoreductase activity, acting on peroxide as acceptor);GO:0031932(TORC2 complex);GO:0034198(cellular response to amino acid starvation);GO:0042149(cellular response to glucose starv…	04115(p53 signaling pathway);04211(Longevity regulating pathway)	down
ENSG00000111817	DSE	1.11111	0	0	0.658	0.365	dermatan sulfate epimerase [Source:HGNC Symbol;Acc:HGNC:21144]	GO:0000139(Golgi membrane);GO:0005654(nucleoplasm);GO:0005783(endoplasmic reticulum);GO:0005794(Golgi apparatus);GO:0005829(cytosol);GO:0015012(heparan sulfate proteoglycan biosynthetic process);GO:0016020(membrane);GO:0016021(integral component of membrane);GO:0016853(isomerase activity);GO:0030206(chondroitin sulfate biosynthetic process);GO:0030208(dermatan sulfate biosynthetic process);GO:004…	00532(Glycosaminoglycan biosynthesis - chondroitin sulfate / dermatan sulfate)	up
ENSG00000230202	AL450405.1	-1.02406	0	0	0.004	0.298	ribosomal protein L29 (RPL29) pseudogene	NA	NA	down
ENSG00000111885	MAN1A1	-1.20135	0	0	0.255	0.536	mannosidase alpha class 1A member 1 [Source:HGNC Symbol;Acc:HGNC:6821]	GO:0000139(Golgi membrane);GO:0003824(catalytic activity);GO:0004571(mannosyl-oligosaccharide 1,2-alpha-mannosidase activity);GO:0005509(calcium ion binding);GO:0005783(endoplasmic reticulum);GO:0005793(endoplasmic reticulum-Golgi intermediate compartment);GO:0005794(Golgi apparatus);GO:0005829(cytosol);GO:0006486(protein glycosylation);GO:0006491(N-glycan processing);GO:0008152(metabolic process…	00510(N-Glycan biosynthesis);04141(Protein processing in endoplasmic reticulum)	down
ENSG00000079819	EPB41L2	-0.884079	0	0	0.052	0.311	erythrocyte membrane protein band 4.1 like 2 [Source:HGNC Symbol;Acc:HGNC:3379]	GO:0003779(actin binding);GO:0005198(structural molecule activity);GO:0005515(protein binding);GO:0005634(nucleus);GO:0005654(nucleoplasm);GO:0005737(cytoplasm);GO:0005829(cytosol);GO:0005856(cytoskeleton);GO:0005886(plasma membrane);GO:0005925(focal adhesion);GO:0005938(cell cortex);GO:0007049(cell cycle);GO:0008091(spectrin);GO:0008092(cytoskeletal protein binding);GO:0008180(COP9 signalosome);…	NA	down
ENSG00000075624	ACTB	1.36981	0	0	0.998	0.991	actin beta [Source:HGNC Symbol;Acc:HGNC:132]	GO:0000079(regulation of cyclin-dependent protein serine/threonine kinase activity);GO:0000166(nucleotide binding);GO:0000790(nuclear chromatin);GO:0000978(RNA polymerase II proximal promoter sequence-specific DNA binding);GO:0000980(RNA polymerase II distal enhancer sequence-specific DNA binding);GO:0001895(retina homeostasis);GO:0005200(structural constituent of cytoskeleton);GO:0005515(protein…	04015(Rap1 signaling pathway);04145(Phagosome);04210(Apoptosis);04390(Hippo signaling pathway);04510(Focal adhesion);04520(Adherens junction);04530(Tight junction);04611(Platelet activation);04670(Leukocyte transendothelial migration);04714(Thermogenesis);04810(Regulation of actin cytoskeleton);04919(Thyroid hormone signaling pathway);04921(Oxytocin signaling pathway);04971(Gastric acid secretion…	up
ENSG00000048052	HDAC9	-0.73587	0	0	0.024	0.256	histone deacetylase 9 [Source:HGNC Symbol;Acc:HGNC:14065]	GO:0000118(histone deacetylase complex);GO:0000122(negative regulation of transcription by RNA polymerase II);GO:0001975(response to amphetamine);GO:0003714(transcription corepressor activity);GO:0004407(histone deacetylase activity);GO:0005080(protein kinase C binding);GO:0005515(protein binding);GO:0005634(nucleus);GO:0005654(nucleoplasm);GO:0005667(transcription factor complex);GO:0005737(cyto…	05034(Alcoholism);05203(Viral carcinogenesis)	down
ENSG00000127951	FGL2	-1.21184	0	0	0.249	0.673	fibrinogen like 2 [Source:HGNC Symbol;Acc:HGNC:3696]	GO:0005201(extracellular matrix structural constituent);GO:0005576(extracellular region);GO:0005577(fibrinogen complex);GO:0006508(proteolysis);GO:0008233(peptidase activity);GO:0043312(neutrophil degranulation);GO:0062023(collagen-containing extracellular matrix);GO:0070062(extracellular exosome);GO:1904813(ficolin-1-rich granule lumen)	NA	down
ENSG00000085662	AKR1B1	-1.51183	0	0	0.085	0.462	aldo-keto reductase family 1 member B [Source:HGNC Symbol;Acc:HGNC:381]	GO:0001523(retinoid metabolic process);GO:0001758(retinal dehydrogenase activity);GO:0001894(tissue homeostasis);GO:0003091(renal water homeostasis);GO:0004032(alditol:NADP+ 1-oxidoreductase activity);GO:0005615(extracellular space);GO:0005654(nucleoplasm);GO:0005737(cytoplasm);GO:0005829(cytosol);GO:0005975(carbohydrate metabolic process);GO:0005996(monosaccharide metabolic process);GO:0006061(s…	00040(Pentose and glucuronate interconversions);00051(Fructose and mannose metabolism);00052(Galactose metabolism);00561(Glycerolipid metabolism);00790(Folate biosynthesis)	down
ENSG00000258227	CLEC5A	1.67683	0	0	0.456	0.042	C-type lectin domain containing 5A [Source:HGNC Symbol;Acc:HGNC:2054]	GO:0001618(virus receptor activity);GO:0002076(osteoblast development);GO:0002376(immune system process);GO:0005515(protein binding);GO:0005829(cytosol);GO:0005886(plasma membrane);GO:0005887(integral component of plasma membrane);GO:0006968(cellular defense response);GO:0007165(signal transduction);GO:0009986(cell surface);GO:0016020(membrane);GO:0016021(integral component of membrane);GO:001603…	NA	up
ENSG00000171659	GPR34	-1.44065	0	0	0.102	0.531	G protein-coupled receptor 34 [Source:HGNC Symbol;Acc:HGNC:4490]	GO:0004930(G protein-coupled receptor activity);GO:0005886(plasma membrane);GO:0005887(integral component of plasma membrane);GO:0007165(signal transduction);GO:0007186(G protein-coupled receptor signaling pathway);GO:0016020(membrane);GO:0016021(integral component of membrane);GO:0035589(G protein-coupled purinergic nucleotide receptor signaling pathway);GO:0045028(G protein-coupled purinergic n…	NA	down
ENSG00000102265	TIMP1	3.87733	0	0	0.957	0.6	TIMP metallopeptidase inhibitor 1 [Source:HGNC Symbol;Acc:HGNC:11820]	GO:0001775(cell activation);GO:0002020(protease binding);GO:0002248(connective tissue replacement involved in inflammatory response wound healing);GO:0002576(platelet degranulation);GO:0004857(enzyme inhibitor activity);GO:0005125(cytokine activity);GO:0005515(protein binding);GO:0005576(extracellular region);GO:0005581(collagen trimer);GO:0005604(basement membrane);GO:0005615(extracellular space…	04066(HIF-1 signaling pathway)	up
ENSG00000155659	VSIG4	-1.06611	0	0	0.595	0.883	V-set and immunoglobulin domain containing 4 [Source:HGNC Symbol;Acc:HGNC:17032]	GO:0001851(complement component C3b binding);GO:0002376(immune system process);GO:0006957(complement activation, alternative pathway);GO:0016020(membrane);GO:0016021(integral component of membrane);GO:0032703(negative regulation of interleukin-2 production);GO:0032991(protein-containing complex);GO:0042130(negative regulation of T cell proliferation);GO:0043031(negative regulation of macrophage a…	04610(Complement and coagulation cascades)	down
ENSG00000230508	RPL19P21	0.00174934	0	0	0.001	0.001	ribosomal protein L19 pseudogene 21 [Source:HGNC Symbol;Acc:HGNC:35868]	NA	NA	no_diff
ENSG00000196924	FLNA	1.33325	0	0	0.698	0.322	filamin A [Source:HGNC Symbol;Acc:HGNC:3754]	GO:0001664(G protein-coupled receptor binding);GO:0002576(platelet degranulation);GO:0003723(RNA binding);GO:0003779(actin binding);GO:0005515(protein binding);GO:0005576(extracellular region);GO:0005634(nucleus);GO:0005730(nucleolus);GO:0005737(cytoplasm);GO:0005829(cytosol);GO:0005856(cytoskeleton);GO:0005884(actin filament);GO:0005886(plasma membrane);GO:0005911(cell-cell junction);GO:0005925(…	04010(MAPK signaling pathway);04510(Focal adhesion);05132(Salmonella infection);05205(Proteoglycans in cancer)	up
ENSG00000147408	CSGALNACT1	-0.690731	0	0	0.015	0.226	chondroitin sulfate N-acetylgalactosaminyltransferase 1 [Source:HGNC Symbol;Acc:HGNC:24290]	GO:0000139(Golgi membrane);GO:0001958(endochondral ossification);GO:0005794(Golgi apparatus);GO:0007399(nervous system development);GO:0008037(cell recognition);GO:0008283(cell population proliferation);GO:0008376(acetylgalactosaminyltransferase activity);GO:0008955(peptidoglycan glycosyltransferase activity);GO:0009653(anatomical structure morphogenesis);GO:0015014(heparan sulfate proteoglycan b…	00532(Glycosaminoglycan biosynthesis - chondroitin sulfate / dermatan sulfate)	down
ENSG00000164687	FABP5	2.63256	0	0	0.666	0.224	fatty acid binding protein 5 [Source:HGNC Symbol;Acc:HGNC:3560]	GO:0001972(retinoic acid binding);GO:0005504(fatty acid binding);GO:0005515(protein binding);GO:0005576(extracellular region);GO:0005615(extracellular space);GO:0005634(nucleus);GO:0005654(nucleoplasm);GO:0005737(cytoplasm);GO:0005829(cytosol);GO:0005886(plasma membrane);GO:0006006(glucose metabolic process);GO:0006629(lipid metabolic process);GO:0006656(phosphatidylcholine biosynthetic process);…	03320(PPAR signaling pathway)	up
ENSG00000123124	WWP1	-0.936394	0	0	0.106	0.392	WW domain containing E3 ubiquitin protein ligase 1 [Source:HGNC Symbol;Acc:HGNC:17004]	GO:0000151(ubiquitin ligase complex);GO:0000209(protein polyubiquitination);GO:0004842(ubiquitin-protein transferase activity);GO:0005515(protein binding);GO:0005634(nucleus);GO:0005737(cytoplasm);GO:0005829(cytosol);GO:0005886(plasma membrane);GO:0006511(ubiquitin-dependent protein catabolic process);GO:0007165(signal transduction);GO:0007417(central nervous system development);GO:0016020(membra…	04120(Ubiquitin mediated proteolysis);04144(Endocytosis)	down
ENSG00000169439	SDC2	1.42878	0	0	0.458	0.113	syndecan 2 [Source:HGNC Symbol;Acc:HGNC:10659]	GO:0001523(retinoid metabolic process);GO:0005515(protein binding);GO:0005788(endoplasmic reticulum lumen);GO:0005796(Golgi lumen);GO:0005886(plasma membrane);GO:0006024(glycosaminoglycan biosynthetic process);GO:0006027(glycosaminoglycan catabolic process);GO:0007399(nervous system development);GO:0008150(biological_process);GO:0009986(cell surface);GO:0016020(membrane);GO:0016021(integral compo…	04514(Cell adhesion molecules (CAMs));05144(Malaria);05205(Proteoglycans in cancer);05418(Fluid shear stress and atherosclerosis)	up
ENSG00000070756	PABPC1	-0.799697	0	0	0.875	0.936	poly(A) binding protein cytoplasmic 1 [Source:HGNC Symbol;Acc:HGNC:8554]	GO:0000184(nuclear-transcribed mRNA catabolic process, nonsense-mediated decay);GO:0000398(mRNA splicing, via spliceosome);GO:0003676(nucleic acid binding);GO:0003723(RNA binding);GO:0003730(mRNA 3'-UTR binding);GO:0005515(protein binding);GO:0005634(nucleus);GO:0005681(spliceosomal complex);GO:0005737(cytoplasm);GO:0005829(cytosol);GO:0005925(focal adhesion);GO:0006378(mRNA polyadenylation);GO:0…	03013(RNA transport);03015(mRNA surveillance pathway);03018(RNA degradation)	down
ENSG00000147872	PLIN2	1.2078	0	0	0.809	0.601	perilipin 2 [Source:HGNC Symbol;Acc:HGNC:248]	GO:0005576(extracellular region);GO:0005634(nucleus);GO:0005737(cytoplasm);GO:0005783(endoplasmic reticulum);GO:0005811(lipid droplet);GO:0005829(cytosol);GO:0005886(plasma membrane);GO:0014070(response to organic cyclic compound);GO:0015909(long-chain fatty acid transport);GO:0016020(membrane);GO:0019216(regulation of lipid metabolic process);GO:0019915(lipid storage);GO:0042493(response to drug)	03320(PPAR signaling pathway)	up
ENSG00000122694	GLIPR2	1.31801	0	0	0.583	0.163	GLI pathogenesis related 2 [Source:HGNC Symbol;Acc:HGNC:18007]	GO:0000139(Golgi membrane);GO:0005576(extracellular region);GO:0005615(extracellular space);GO:0005794(Golgi apparatus);GO:0010634(positive regulation of epithelial cell migration);GO:0010718(positive regulation of epithelial to mesenchymal transition);GO:0016020(membrane);GO:0042803(protein homodimerization activity);GO:0070062(extracellular exosome);GO:0070374(positive regulation of ERK1 and ER…	NA	up
ENSG00000135047	CTSL	2.47834	0	0	0.744	0.362	cathepsin L [Source:HGNC Symbol;Acc:HGNC:2537]	GO:0001968(fibronectin binding);GO:0002224(toll-like receptor signaling pathway);GO:0002250(adaptive immune response);GO:0004197(cysteine-type endopeptidase activity);GO:0005515(protein binding);GO:0005518(collagen binding);GO:0005576(extracellular region);GO:0005615(extracellular space);GO:0005634(nucleus);GO:0005764(lysosome);GO:0006508(proteolysis);GO:0008233(peptidase activity);GO:0008234(cys…	04140(Autophagy - animal);04142(Lysosome);04145(Phagosome);04210(Apoptosis);04612(Antigen processing and presentation);05205(Proteoglycans in cancer);05323(Rheumatoid arthritis);05418(Fluid shear stress and atherosclerosis)	up
ENSG00000204136	GGTA1P	-1.77889	0	0	0.073	0.619	glycoprotein, alpha-galactosyltransferase 1 pseudogene [Source:HGNC Symbol;Acc:HGNC:4253]	NA	NA	down
ENSG00000117984	CTSD	1.29356	0	0	0.902	0.775	cathepsin D [Source:HGNC Symbol;Acc:HGNC:2529]	GO:0004190(aspartic-type endopeptidase activity);GO:0005515(protein binding);GO:0005576(extracellular region);GO:0005615(extracellular space);GO:0005764(lysosome);GO:0006508(proteolysis);GO:0008233(peptidase activity);GO:0016787(hydrolase activity);GO:0019886(antigen processing and presentation of exogenous peptide antigen via MHC class II);GO:0030163(protein catabolic process);GO:0030574(collage…	04071(Sphingolipid signaling pathway);04140(Autophagy - animal);04142(Lysosome);04210(Apoptosis);04915(Estrogen signaling pathway);05152(Tuberculosis)	up
ENSG00000133800	LYVE1	-1.78077	0	0	0.247	0.772	lymphatic vessel endothelial hyaluronan receptor 1 [Source:HGNC Symbol;Acc:HGNC:14687]	GO:0004888(transmembrane signaling receptor activity);GO:0005515(protein binding);GO:0005540(hyaluronic acid binding);GO:0005886(plasma membrane);GO:0005887(integral component of plasma membrane);GO:0006027(glycosaminoglycan catabolic process);GO:0007155(cell adhesion);GO:0007160(cell-matrix adhesion);GO:0009611(response to wounding);GO:0009653(anatomical structure morphogenesis);GO:0016020(membr…	NA	down
ENSG00000134333	LDHA	1.04555	0	0	0.673	0.438	lactate dehydrogenase A [Source:HGNC Symbol;Acc:HGNC:6535]	GO:0003824(catalytic activity);GO:0004459(L-lactate dehydrogenase activity);GO:0005515(protein binding);GO:0005634(nucleus);GO:0005737(cytoplasm);GO:0005829(cytosol);GO:0005975(carbohydrate metabolic process);GO:0006090(pyruvate metabolic process);GO:0006096(glycolytic process);GO:0016020(membrane);GO:0016021(integral component of membrane);GO:0016491(oxidoreductase activity);GO:0016616(oxidoredu…	00010(Glycolysis / Gluconeogenesis);00270(Cysteine and methionine metabolism);00620(Pyruvate metabolism);00640(Propanoate metabolism);04066(HIF-1 signaling pathway);04922(Glucagon signaling pathway);05230(Central carbon metabolism in cancer)	up
ENSG00000026508	CD44	1.42235	0	0	0.867	0.554	CD44 molecule (Indian blood group) [Source:HGNC Symbol;Acc:HGNC:1681]	GO:0004888(transmembrane signaling receptor activity);GO:0004896(cytokine receptor activity);GO:0005515(protein binding);GO:0005518(collagen binding);GO:0005540(hyaluronic acid binding);GO:0005794(Golgi apparatus);GO:0005829(cytosol);GO:0005886(plasma membrane);GO:0005887(integral component of plasma membrane);GO:0005902(microvillus);GO:0005925(focal adhesion);GO:0006954(inflammatory response);GO…	04512(ECM-receptor interaction);04640(Hematopoietic cell lineage);05131(Shigellosis);05169(Epstein-Barr virus infection);05205(Proteoglycans in cancer);05206(MicroRNAs in cancer)	up
ENSG00000110077	MS4A6A	-2.06928	0	0	0.385	0.924	membrane spanning 4-domains A6A [Source:HGNC Symbol;Acc:HGNC:13375]	GO:0016020(membrane);GO:0016021(integral component of membrane)	NA	down
ENSG00000110079	MS4A4A	-1.47253	0	0	0.305	0.727	membrane spanning 4-domains A4A [Source:HGNC Symbol;Acc:HGNC:13371]	GO:0016020(membrane);GO:0016021(integral component of membrane)	NA	down
ENSG00000166927	MS4A7	-1.16245	0	0	0.542	0.808	membrane spanning 4-domains A7 [Source:HGNC Symbol;Acc:HGNC:13378]	GO:0016020(membrane);GO:0016021(integral component of membrane)	NA	down
ENSG00000124942	AHNAK	-1.04496	0	0	0.659	0.896	AHNAK nucleoprotein [Source:HGNC Symbol;Acc:HGNC:347]	GO:0003723(RNA binding);GO:0005515(protein binding);GO:0005634(nucleus);GO:0005737(cytoplasm);GO:0005765(lysosomal membrane);GO:0005829(cytosol);GO:0005886(plasma membrane);GO:0005925(focal adhesion);GO:0015629(actin cytoskeleton);GO:0016020(membrane);GO:0030315(T-tubule);GO:0031982(vesicle);GO:0042383(sarcolemma);GO:0043034(costamere);GO:0043484(regulation of RNA splicing);GO:0044291(cell-cell c…	NA	down
ENSG00000172757	CFL1	0.60491	0	0	0.932	0.894	cofilin 1 [Source:HGNC Symbol;Acc:HGNC:1874]	GO:0000281(mitotic cytokinesis);GO:0001755(neural crest cell migration);GO:0001842(neural fold formation);GO:0003779(actin binding);GO:0005102(signaling receptor binding);GO:0005515(protein binding);GO:0005615(extracellular space);GO:0005622(intracellular);GO:0005634(nucleus);GO:0005737(cytoplasm);GO:0005829(cytosol);GO:0005856(cytoskeleton);GO:0005886(plasma membrane);GO:0005911(cell-cell juncti…	04360(Axon guidance);04666(Fc gamma R-mediated phagocytosis);04810(Regulation of actin cytoskeleton);05133(Pertussis);05170(Human immunodeficiency virus 1 infection)	up
ENSG00000165457	FOLR2	-1.73463	0	0	0.097	0.628	folate receptor beta [Source:HGNC Symbol;Acc:HGNC:3793]	GO:0005542(folic acid binding);GO:0005576(extracellular region);GO:0005886(plasma membrane);GO:0006898(receptor-mediated endocytosis);GO:0006954(inflammatory response);GO:0007155(cell adhesion);GO:0007342(fusion of sperm to egg plasma membrane involved in single fertilization);GO:0008144(drug binding);GO:0008284(positive regulation of cell population proliferation);GO:0009986(cell surface);GO:001…	01523(Antifolate resistance);04144(Endocytosis)	down
ENSG00000084234	APLP2	0.843412	0	0	0.867	0.744	amyloid beta precursor like protein 2 [Source:HGNC Symbol;Acc:HGNC:598]	GO:0002576(platelet degranulation);GO:0003677(DNA binding);GO:0004867(serine-type endopeptidase inhibitor activity);GO:0005515(protein binding);GO:0005634(nucleus);GO:0005788(endoplasmic reticulum lumen);GO:0005886(plasma membrane);GO:0007186(G protein-coupled receptor signaling pathway);GO:0008201(heparin binding);GO:0010466(negative regulation of peptidase activity);GO:0010951(negative regulati…	NA	up
ENSG00000026025	VIM	1.06249	0	0	0.991	0.969	vimentin [Source:HGNC Symbol;Acc:HGNC:12692]	GO:0003725(double-stranded RNA binding);GO:0005198(structural molecule activity);GO:0005200(structural constituent of cytoskeleton);GO:0005212(structural constituent of eye lens);GO:0005515(protein binding);GO:0005634(nucleus);GO:0005737(cytoplasm);GO:0005777(peroxisome);GO:0005829(cytosol);GO:0005844(polysome);GO:0005856(cytoskeleton);GO:0005882(intermediate filament);GO:0005886(plasma membrane)…	05169(Epstein-Barr virus infection);05206(MicroRNAs in cancer)	up
ENSG00000260314	MRC1	-2.12429	0	0	0.297	0.884	mannose receptor C-type 1 [Source:HGNC Symbol;Acc:HGNC:7228]	GO:0001618(virus receptor activity);GO:0004888(transmembrane signaling receptor activity);GO:0005515(protein binding);GO:0005537(mannose binding);GO:0005768(endosome);GO:0005886(plasma membrane);GO:0005887(integral component of plasma membrane);GO:0006897(endocytosis);GO:0006898(receptor-mediated endocytosis);GO:0009986(cell surface);GO:0010008(endosome membrane);GO:0016020(membrane);GO:0016021(i…	04145(Phagosome);05152(Tuberculosis)	down
ENSG00000107968	MAP3K8	1.08803	0	0	0.703	0.439	mitogen-activated protein kinase kinase kinase 8 [Source:HGNC Symbol;Acc:HGNC:6860]	GO:0000166(nucleotide binding);GO:0000186(activation of MAPKK activity);GO:0000287(magnesium ion binding);GO:0002376(immune system process);GO:0004672(protein kinase activity);GO:0004674(protein serine/threonine kinase activity);GO:0004709(MAP kinase kinase kinase activity);GO:0005515(protein binding);GO:0005524(ATP binding);GO:0005737(cytoplasm);GO:0005829(cytosol);GO:0006468(protein phosphoryla…	04010(MAPK signaling pathway);04620(Toll-like receptor signaling pathway);04660(T cell receptor signaling pathway);04668(TNF signaling pathway)	up
ENSG00000122862	SRGN	1.18551	0	0	0.972	0.94	serglycin [Source:HGNC Symbol;Acc:HGNC:9361]	GO:0002576(platelet degranulation);GO:0005515(protein binding);GO:0005576(extracellular region);GO:0005615(extracellular space);GO:0005794(Golgi apparatus);GO:0006915(apoptotic process);GO:0008626(granzyme-mediated apoptotic signaling pathway);GO:0016485(protein processing);GO:0030502(negative regulation of bone mineralization);GO:0031093(platelet alpha granule lumen);GO:0031214(biomineral tissue…	NA	up
ENSG00000156113	KCNMA1	-0.671463	0	0	0.014	0.208	potassium calcium-activated channel subfamily M alpha 1 [Source:HGNC Symbol;Acc:HGNC:6284]	GO:0001666(response to hypoxia);GO:0003779(actin binding);GO:0005216(ion channel activity);GO:0005244(voltage-gated ion channel activity);GO:0005249(voltage-gated potassium channel activity);GO:0005267(potassium channel activity);GO:0005515(protein binding);GO:0005886(plasma membrane);GO:0005901(caveola);GO:0006811(ion transport);GO:0006813(potassium ion transport);GO:0006970(response to osmotic …	04022(cGMP-PKG signaling pathway);04270(Vascular smooth muscle contraction);04911(Insulin secretion);04924(Renin secretion);04970(Salivary secretion);04972(Pancreatic secretion)	down
ENSG00000148834	GSTO1	1.12659	0	0	0.747	0.462	glutathione S-transferase omega 1 [Source:HGNC Symbol;Acc:HGNC:13312]	GO:0004364(glutathione transferase activity);GO:0005515(protein binding);GO:0005737(cytoplasm);GO:0005829(cytosol);GO:0010880(regulation of release of sequestered calcium ion into cytosol by sarcoplasmic reticulum);GO:0010881(regulation of cardiac muscle contraction by regulation of the release of sequestered calcium ion);GO:0014810(positive regulation of skeletal muscle contraction by regulation…	00480(Glutathione metabolism);00980(Metabolism of xenobiotics by cytochrome P450);00982(Drug metabolism - cytochrome P450);00983(Drug metabolism - other enzymes);01524(Platinum drug resistance);05200(Pathways in cancer);05204(Chemical carcinogenesis);05225(Hepatocellular carcinoma);05418(Fluid shear stress and atherosclerosis)	up
ENSG00000111640	GAPDH	1.28009	0	0	0.964	0.893	glyceraldehyde-3-phosphate dehydrogenase [Source:HGNC Symbol;Acc:HGNC:4141]	GO:0000166(nucleotide binding);GO:0000226(microtubule cytoskeleton organization);GO:0004365(glyceraldehyde-3-phosphate dehydrogenase (NAD+) (phosphorylating) activity);GO:0005515(protein binding);GO:0005634(nucleus);GO:0005737(cytoplasm);GO:0005811(lipid droplet);GO:0005829(cytosol);GO:0005856(cytoskeleton);GO:0005886(plasma membrane);GO:0006006(glucose metabolic process);GO:0006094(gluconeogenes…	00010(Glycolysis / Gluconeogenesis);04066(HIF-1 signaling pathway);05010(Alzheimer disease)	up
ENSG00000010610	CD4	-0.957982	0	0	0.191	0.555	CD4 molecule [Source:HGNC Symbol;Acc:HGNC:1678]	GO:0001618(virus receptor activity);GO:0001816(cytokine production);GO:0001934(positive regulation of protein phosphorylation);GO:0002250(adaptive immune response);GO:0002376(immune system process);GO:0004888(transmembrane signaling receptor activity);GO:0005102(signaling receptor binding);GO:0005201(extracellular matrix structural constituent);GO:0005515(protein binding);GO:0005769(early endosom…	04060(Cytokine-cytokine receptor interaction);04514(Cell adhesion molecules (CAMs));04612(Antigen processing and presentation);04640(Hematopoietic cell lineage);04658(Th1 and Th2 cell differentiation);04659(Th17 cell differentiation);04660(T cell receptor signaling pathway);05166(Human T-cell leukemia virus 1 infection);05170(Human immunodeficiency virus 1 infection);05340(Primary immunodeficienc…	down
ENSG00000175899	A2M	-1.62466	0	0	0.116	0.581	alpha-2-macroglobulin [Source:HGNC Symbol;Acc:HGNC:7]	GO:0001869(negative regulation of complement activation, lectin pathway);GO:0002020(protease binding);GO:0002576(platelet degranulation);GO:0004866(endopeptidase inhibitor activity);GO:0004867(serine-type endopeptidase inhibitor activity);GO:0005102(signaling receptor binding);GO:0005515(protein binding);GO:0005576(extracellular region);GO:0005615(extracellular space);GO:0005829(cytosol);GO:00075…	04610(Complement and coagulation cascades)	down
ENSG00000111341	MGP	-1.28951	0	0	0.334	0.695	matrix Gla protein [Source:HGNC Symbol;Acc:HGNC:7060]	GO:0001502(cartilage condensation);GO:0001503(ossification);GO:0005201(extracellular matrix structural constituent);GO:0005509(calcium ion binding);GO:0005515(protein binding);GO:0005576(extracellular region);GO:0007275(multicellular organism development);GO:0008147(structural constituent of bone);GO:0030154(cell differentiation);GO:0030500(regulation of bone mineralization);GO:0031012(extracellu…	NA	down
ENSG00000185432	METTL7A	-1.42909	0	0	0.17	0.669	methyltransferase like 7A [Source:HGNC Symbol;Acc:HGNC:24550]	GO:0005576(extracellular region);GO:0005783(endoplasmic reticulum);GO:0005811(lipid droplet);GO:0008168(methyltransferase activity);GO:0016020(membrane);GO:0016021(integral component of membrane);GO:0016740(transferase activity);GO:0032259(methylation);GO:0043312(neutrophil degranulation);GO:1904724(tertiary granule lumen)	NA	down
ENSG00000135404	CD63	0.833307	0	0	0.92	0.859	CD63 molecule [Source:HGNC Symbol;Acc:HGNC:1692]	GO:0002092(positive regulation of receptor internalization);GO:0002576(platelet degranulation);GO:0005515(protein binding);GO:0005576(extracellular region);GO:0005615(extracellular space);GO:0005764(lysosome);GO:0005765(lysosomal membrane);GO:0005768(endosome);GO:0005770(late endosome);GO:0005771(multivesicular body);GO:0005886(plasma membrane);GO:0005887(integral component of plasma membrane);GO…	04142(Lysosome);05205(Proteoglycans in cancer)	up
ENSG00000092841	MYL6	1.016	0	0	0.952	0.881	myosin light chain 6 [Source:HGNC Symbol;Acc:HGNC:7587]	GO:0003774(motor activity);GO:0005509(calcium ion binding);GO:0005515(protein binding);GO:0005829(cytosol);GO:0005903(brush border);GO:0006936(muscle contraction);GO:0007519(skeletal muscle tissue development);GO:0008307(structural constituent of muscle);GO:0016020(membrane);GO:0016459(myosin complex);GO:0016461(unconventional myosin complex);GO:0030049(muscle filament sliding);GO:0030898(actin-d…	04270(Vascular smooth muscle contraction);04530(Tight junction);04921(Oxytocin signaling pathway)	up
ENSG00000135678	CPM	-1.84691	0	0	0.299	0.792	carboxypeptidase M [Source:HGNC Symbol;Acc:HGNC:2311]	GO:0004180(carboxypeptidase activity);GO:0004181(metallocarboxypeptidase activity);GO:0005576(extracellular region);GO:0005615(extracellular space);GO:0005886(plasma membrane);GO:0006508(proteolysis);GO:0006518(peptide metabolic process);GO:0008233(peptidase activity);GO:0008237(metallopeptidase activity);GO:0008270(zinc ion binding);GO:0009653(anatomical structure morphogenesis);GO:0009986(cell …	NA	down
ENSG00000139289	PHLDA1	2.15145	0	0	0.687	0.155	pleckstrin homology like domain family A member 1 [Source:HGNC Symbol;Acc:HGNC:8933]	GO:0000086(G2/M transition of mitotic cell cycle);GO:0005515(protein binding);GO:0005634(nucleus);GO:0005730(nucleolus);GO:0005737(cytoplasm);GO:0005829(cytosol);GO:0006915(apoptotic process);GO:0031410(cytoplasmic vesicle);GO:0045210(FasL biosynthetic process)	NA	up
ENSG00000017427	IGF1	-1.15174	0	0	0.026	0.327	insulin like growth factor 1 [Source:HGNC Symbol;Acc:HGNC:5464]	GO:0000187(activation of MAPK activity);GO:0001501(skeletal system development);GO:0001775(cell activation);GO:0002576(platelet degranulation);GO:0005158(insulin receptor binding);GO:0005159(insulin-like growth factor receptor binding);GO:0005178(integrin binding);GO:0005179(hormone activity);GO:0005515(protein binding);GO:0005576(extracellular region);GO:0005615(extracellular space);GO:0007165(s…	01521(EGFR tyrosine kinase inhibitor resistance);01522(Endocrine resistance);04010(MAPK signaling pathway);04014(Ras signaling pathway);04015(Rap1 signaling pathway);04066(HIF-1 signaling pathway);04068(FoxO signaling pathway);04114(Oocyte meiosis);04115(p53 signaling pathway);04150(mTOR signaling pathway);04151(PI3K-Akt signaling pathway);04152(AMPK signaling pathway);04211(Longevity regulating …	down
ENSG00000120694	HSPH1	-1.41206	0	0	0.519	0.867	heat shock protein family H (Hsp110) member 1 [Source:HGNC Symbol;Acc:HGNC:16969]	GO:0000166(nucleotide binding);GO:0000774(adenyl-nucleotide exchange factor activity);GO:0005515(protein binding);GO:0005524(ATP binding);GO:0005576(extracellular region);GO:0005634(nucleus);GO:0005654(nucleoplasm);GO:0005737(cytoplasm);GO:0005829(cytosol);GO:0005874(microtubule);GO:0006898(receptor-mediated endocytosis);GO:0006986(response to unfolded protein);GO:0032991(protein-containing compl…	04141(Protein processing in endoplasmic reticulum)	down
ENSG00000133112	TPT1	-0.539516	0	0	0.995	0.998	tumor protein, translationally-controlled 1 [Source:HGNC Symbol;Acc:HGNC:12022]	GO:0000922(spindle pole);GO:0003723(RNA binding);GO:0005509(calcium ion binding);GO:0005515(protein binding);GO:0005615(extracellular space);GO:0005634(nucleus);GO:0005737(cytoplasm);GO:0005771(multivesicular body);GO:0005829(cytosol);GO:0005881(cytoplasmic microtubule);GO:0006816(calcium ion transport);GO:0006874(cellular calcium ion homeostasis);GO:0009615(response to virus);GO:0042981(regulati…	NA	down
ENSG00000136167	LCP1	0.941346	0	0	0.86	0.695	lymphocyte cytosolic protein 1 [Source:HGNC Symbol;Acc:HGNC:6528]	GO:0001725(stress fiber);GO:0001726(ruffle);GO:0001891(phagocytic cup);GO:0002102(podosome);GO:0002286(T cell activation involved in immune response);GO:0003779(actin binding);GO:0005178(integrin binding);GO:0005509(calcium ion binding);GO:0005515(protein binding);GO:0005615(extracellular space);GO:0005737(cytoplasm);GO:0005829(cytosol);GO:0005856(cytoskeleton);GO:0005884(actin filament);GO:00058…	NA	up
ENSG00000136156	ITM2B	-0.903641	0	0	0.728	0.917	integral membrane protein 2B [Source:HGNC Symbol;Acc:HGNC:6174]	GO:0000139(Golgi membrane);GO:0001540(amyloid-beta binding);GO:0005515(protein binding);GO:0005524(ATP binding);GO:0005576(extracellular region);GO:0005615(extracellular space);GO:0005768(endosome);GO:0005794(Golgi apparatus);GO:0005886(plasma membrane);GO:0007399(nervous system development);GO:0010008(endosome membrane);GO:0016020(membrane);GO:0016021(integral component of membrane);GO:0030660(G…	NA	down
ENSG00000129538	RNASE1	-2.5975	0	0	0.478	0.954	ribonuclease A family member 1, pancreatic [Source:HGNC Symbol;Acc:HGNC:10044]	GO:0003676(nucleic acid binding);GO:0004518(nuclease activity);GO:0004519(endonuclease activity);GO:0004522(ribonuclease A activity);GO:0004540(ribonuclease activity);GO:0005515(protein binding);GO:0005576(extracellular region);GO:0016787(hydrolase activity);GO:0070062(extracellular exosome);GO:0090305(nucleic acid phosphodiester bond hydrolysis);GO:0090501(RNA phosphodiester bond hydrolysis);GO:…	NA	down
ENSG00000100644	HIF1A	1.59514	0	0	0.768	0.442	hypoxia inducible factor 1 subunit alpha [Source:HGNC Symbol;Acc:HGNC:4910]	GO:0000981(DNA-binding transcription factor activity, RNA polymerase II-specific);GO:0001228(DNA-binding transcription activator activity, RNA polymerase II-specific);GO:0001525(angiogenesis);GO:0001568(blood vessel development);GO:0001666(response to hypoxia);GO:0001755(neural crest cell migration);GO:0001837(epithelial to mesenchymal transition);GO:0001892(embryonic placenta development);GO:000…	04066(HIF-1 signaling pathway);04137(Mitophagy - animal);04140(Autophagy - animal);04659(Th17 cell differentiation);04919(Thyroid hormone signaling pathway);05167(Kaposi sarcoma-associated herpesvirus infection);05200(Pathways in cancer);05205(Proteoglycans in cancer);05211(Renal cell carcinoma);05230(Central carbon metabolism in cancer);05231(Choline metabolism in cancer)	up
ENSG00000072110	ACTN1	1.09525	0	0	0.504	0.153	actinin alpha 1 [Source:HGNC Symbol;Acc:HGNC:163]	GO:0001725(stress fiber);GO:0001726(ruffle);GO:0002576(platelet degranulation);GO:0003725(double-stranded RNA binding);GO:0003779(actin binding);GO:0005178(integrin binding);GO:0005509(calcium ion binding);GO:0005515(protein binding);GO:0005576(extracellular region);GO:0005615(extracellular space);GO:0005737(cytoplasm);GO:0005829(cytosol);GO:0005856(cytoskeleton);GO:0005884(actin filament);GO:000…	04510(Focal adhesion);04520(Adherens junction);04530(Tight junction);04670(Leukocyte transendothelial migration);04810(Regulation of actin cytoskeleton);05146(Amoebiasis);05203(Viral carcinogenesis);05322(Systemic lupus erythematosus)	up
ENSG00000197249	SERPINA1	1.48054	0	0	0.651	0.25	serpin family A member 1 [Source:HGNC Symbol;Acc:HGNC:8941]	GO:0000139(Golgi membrane);GO:0002020(protease binding);GO:0002576(platelet degranulation);GO:0004867(serine-type endopeptidase inhibitor activity);GO:0005515(protein binding);GO:0005576(extracellular region);GO:0005615(extracellular space);GO:0005783(endoplasmic reticulum);GO:0005788(endoplasmic reticulum lumen);GO:0005794(Golgi apparatus);GO:0006888(endoplasmic reticulum to Golgi vesicle-mediat…	04610(Complement and coagulation cascades)	up
ENSG00000080824	HSP90AA1	-1.30548	0	0	0.921	0.989	heat shock protein 90 alpha family class A member 1 [Source:HGNC Symbol;Acc:HGNC:5253]	GO:0000086(G2/M transition of mitotic cell cycle);GO:0000166(nucleotide binding);GO:0001934(positive regulation of protein phosphorylation);GO:0003723(RNA binding);GO:0005515(protein binding);GO:0005524(ATP binding);GO:0005576(extracellular region);GO:0005634(nucleus);GO:0005654(nucleoplasm);GO:0005737(cytoplasm);GO:0005829(cytosol);GO:0005886(plasma membrane);GO:0006457(protein folding);GO:00068…	04141(Protein processing in endoplasmic reticulum);04151(PI3K-Akt signaling pathway);04217(Necroptosis);04612(Antigen processing and presentation);04621(NOD-like receptor signaling pathway);04657(IL-17 signaling pathway);04659(Th17 cell differentiation);04914(Progesterone-mediated oocyte maturation);04915(Estrogen signaling pathway);05200(Pathways in cancer);05215(Prostate cancer);05418(Fluid she…	down
ENSG00000185215	TNFAIP2	-1.01372	0	0	0.286	0.613	TNF alpha induced protein 2 [Source:HGNC Symbol;Acc:HGNC:11895]	GO:0000145(exocyst);GO:0000149(SNARE binding);GO:0001525(angiogenesis);GO:0005615(extracellular space);GO:0006887(exocytosis);GO:0007275(multicellular organism development);GO:0030154(cell differentiation);GO:0051601(exocyst localization)	NA	down
ENSG00000140264	SERF2	0.703362	0	0	0.977	0.94	small EDRK-rich factor 2 [Source:HGNC Symbol;Acc:HGNC:10757]	GO:0003674(molecular_function);GO:0005634(nucleus);GO:0005829(cytosol);GO:0008150(biological_process)	NA	up
ENSG00000103569	AQP9	1.77502	0	0	0.553	0.044	aquaporin 9 [Source:HGNC Symbol;Acc:HGNC:643]	GO:0005275(amine transmembrane transporter activity);GO:0005345(purine nucleobase transmembrane transporter activity);GO:0005350(pyrimidine nucleobase transmembrane transporter activity);GO:0005372(water transmembrane transporter activity);GO:0005886(plasma membrane);GO:0005887(integral component of plasma membrane);GO:0006833(water transport);GO:0006863(purine nucleobase transport);GO:0006955(im…	04976(Bile secretion)	up
ENSG00000182718	ANXA2	0.856504	0	0	0.863	0.725	annexin A2 [Source:HGNC Symbol;Acc:HGNC:537]	GO:0001525(angiogenesis);GO:0001726(ruffle);GO:0001765(membrane raft assembly);GO:0001786(phosphatidylserine binding);GO:0001921(positive regulation of receptor recycling);GO:0001934(positive regulation of protein phosphorylation);GO:0002020(protease binding);GO:0003417(growth plate cartilage development);GO:0003723(RNA binding);GO:0004859(phospholipase inhibitor activity);GO:0005262(calcium chan…	NA	up
ENSG00000140416	TPM1	-1.10215	0	0	0.109	0.401	tropomyosin 1 [Source:HGNC Symbol;Acc:HGNC:12010]	GO:0001701(in utero embryonic development);GO:0001725(stress fiber);GO:0003065(positive regulation of heart rate by epinephrine);GO:0003779(actin binding);GO:0005200(structural constituent of cytoskeleton);GO:0005515(protein binding);GO:0005737(cytoplasm);GO:0005829(cytosol);GO:0005856(cytoskeleton);GO:0005862(muscle thin filament tropomyosin);GO:0005884(actin filament);GO:0006936(muscle contract…	04260(Cardiac muscle contraction);04261(Adrenergic signaling in cardiomyocytes);05206(MicroRNAs in cancer);05410(Hypertrophic cardiomyopathy (HCM));05414(Dilated cardiomyopathy (DCM))	down
ENSG00000137831	UACA	-0.93093	0	0	0.056	0.343	uveal autoantigen with coiled-coil domains and ankyrin repeats [Source:HGNC Symbol;Acc:HGNC:15947]	GO:0003674(molecular_function);GO:0005515(protein binding);GO:0005576(extracellular region);GO:0005634(nucleus);GO:0005737(cytoplasm);GO:0005829(cytosol);GO:0005856(cytoskeleton);GO:0008150(biological_process);GO:0070062(extracellular exosome);GO:0097190(apoptotic signaling pathway);GO:1901222(regulation of NIK/NF-kappaB signaling)	NA	down
ENSG00000067225	PKM	1.67586	0	0	0.844	0.469	pyruvate kinase M1/2 [Source:HGNC Symbol;Acc:HGNC:9021]	GO:0000166(nucleotide binding);GO:0000287(magnesium ion binding);GO:0001666(response to hypoxia);GO:0001889(liver development);GO:0003723(RNA binding);GO:0003824(catalytic activity);GO:0004743(pyruvate kinase activity);GO:0005515(protein binding);GO:0005524(ATP binding);GO:0005576(extracellular region);GO:0005634(nucleus);GO:0005737(cytoplasm);GO:0005739(mitochondrion);GO:0005829(cytosol);GO:0005…	00010(Glycolysis / Gluconeogenesis);00230(Purine metabolism);00620(Pyruvate metabolism);04922(Glucagon signaling pathway);04930(Type II diabetes mellitus);05165(Human papillomavirus infection);05203(Viral carcinogenesis);05230(Central carbon metabolism in cancer)	up
ENSG00000140379	BCL2A1	1.44214	0	0	0.704	0.251	BCL2 related protein A1 [Source:HGNC Symbol;Acc:HGNC:991]	GO:0005515(protein binding);GO:0005737(cytoplasm);GO:0005741(mitochondrial outer membrane);GO:0006915(apoptotic process);GO:0007568(aging);GO:0008630(intrinsic apoptotic signaling pathway in response to DNA damage);GO:0021987(cerebral cortex development);GO:0042803(protein homodimerization activity);GO:0042981(regulation of apoptotic process);GO:0043066(negative regulation of apoptotic process);G…	04064(NF-kappa B signaling pathway);04210(Apoptosis);05202(Transcriptional misregulation in cancer);05221(Acute myeloid leukemia)	up
ENSG00000166825	ANPEP	1.44028	0	0	0.691	0.323	alanyl aminopeptidase, membrane [Source:HGNC Symbol;Acc:HGNC:500]	GO:0001525(angiogenesis);GO:0001618(virus receptor activity);GO:0004177(aminopeptidase activity);GO:0005615(extracellular space);GO:0005737(cytoplasm);GO:0005765(lysosomal membrane);GO:0005793(endoplasmic reticulum-Golgi intermediate compartment);GO:0005886(plasma membrane);GO:0006508(proteolysis);GO:0007275(multicellular organism development);GO:0008233(peptidase activity);GO:0008237(metallopept…	00480(Glutathione metabolism);04614(Renin-angiotensin system);04640(Hematopoietic cell lineage)	up
ENSG00000125148	MT2A	-1.21407	0	0	0.656	0.904	metallothionein 2A [Source:HGNC Symbol;Acc:HGNC:7406]	GO:0005515(protein binding);GO:0005634(nucleus);GO:0005737(cytoplasm);GO:0005829(cytosol);GO:0006878(cellular copper ion homeostasis);GO:0006882(cellular zinc ion homeostasis);GO:0007263(nitric oxide mediated signal transduction);GO:0008144(drug binding);GO:0008270(zinc ion binding);GO:0009617(response to bacterium);GO:0010038(response to metal ion);GO:0010273(detoxification of copper ion);GO:003…	04978(Mineral absorption)	down
ENSG00000169715	MT1E	-1.28785	0	0	0.116	0.391	metallothionein 1E [Source:HGNC Symbol;Acc:HGNC:7397]	GO:0005634(nucleus);GO:0005737(cytoplasm);GO:0006882(cellular zinc ion homeostasis);GO:0008270(zinc ion binding);GO:0010273(detoxification of copper ion);GO:0045926(negative regulation of growth);GO:0046872(metal ion binding);GO:0048471(perinuclear region of cytoplasm);GO:0071276(cellular response to cadmium ion);GO:0071280(cellular response to copper ion);GO:0071294(cellular response to zinc ion)	04978(Mineral absorption)	down
ENSG00000125144	MT1G	-1.71582	0	0	0.056	0.376	metallothionein 1G [Source:HGNC Symbol;Acc:HGNC:7399]	GO:0005515(protein binding);GO:0005634(nucleus);GO:0005737(cytoplasm);GO:0006882(cellular zinc ion homeostasis);GO:0008270(zinc ion binding);GO:0010273(detoxification of copper ion);GO:0030224(monocyte differentiation);GO:0035924(cellular response to vascular endothelial growth factor stimulus);GO:0042117(monocyte activation);GO:0045926(negative regulation of growth);GO:0046872(metal ion binding)…	04978(Mineral absorption)	down
ENSG00000187193	MT1X	-1.41989	0	0	0.258	0.61	metallothionein 1X [Source:HGNC Symbol;Acc:HGNC:7405]	GO:0005515(protein binding);GO:0005634(nucleus);GO:0005737(cytoplasm);GO:0006882(cellular zinc ion homeostasis);GO:0008270(zinc ion binding);GO:0010038(response to metal ion);GO:0010273(detoxification of copper ion);GO:0036018(cellular response to erythropoietin);GO:0045926(negative regulation of growth);GO:0046872(metal ion binding);GO:0048471(perinuclear region of cytoplasm);GO:0071276(cellular…	04978(Mineral absorption)	down
ENSG00000178573	MAF	-1.91866	0	0	0.32	0.846	MAF bZIP transcription factor [Source:HGNC Symbol;Acc:HGNC:6776]	GO:0000122(negative regulation of transcription by RNA polymerase II);GO:0000785(chromatin);GO:0000978(RNA polymerase II proximal promoter sequence-specific DNA binding);GO:0000981(DNA-binding transcription factor activity, RNA polymerase II-specific);GO:0001228(DNA-binding transcription activator activity, RNA polymerase II-specific);GO:0001816(cytokine production);GO:0002088(lens development in…	04658(Th1 and Th2 cell differentiation);05202(Transcriptional misregulation in cancer);05321(Inflammatory bowel disease (IBD))	down
ENSG00000103187	COTL1	0.885488	0	0	0.857	0.668	coactosin like F-actin binding protein 1 [Source:HGNC Symbol;Acc:HGNC:18304]	GO:0003779(actin binding);GO:0005515(protein binding);GO:0005576(extracellular region);GO:0005622(intracellular);GO:0005634(nucleus);GO:0005737(cytoplasm);GO:0005856(cytoskeleton);GO:0008150(biological_process);GO:0019899(enzyme binding);GO:0034774(secretory granule lumen);GO:0043312(neutrophil degranulation);GO:0050832(defense response to fungus);GO:0070062(extracellular exosome);GO:1904813(fico…	NA	up
ENSG00000051523	CYBA	1.35596	0	0	0.937	0.756	cytochrome b-245 alpha chain [Source:HGNC Symbol;Acc:HGNC:2577]	GO:0001666(response to hypoxia);GO:0001725(stress fiber);GO:0001938(positive regulation of endothelial cell proliferation);GO:0002479(antigen processing and presentation of exogenous peptide antigen via MHC class I, TAP-dependent);GO:0003106(negative regulation of glomerular filtration by angiotensin);GO:0005515(protein binding);GO:0005634(nucleus);GO:0005737(cytoplasm);GO:0005768(endosome);GO:00…	04145(Phagosome);04380(Osteoclast differentiation);04621(NOD-like receptor signaling pathway);04670(Leukocyte transendothelial migration);05140(Leishmaniasis);05418(Fluid shear stress and atherosclerosis)	up
ENSG00000108518	PFN1	0.781795	0	0	0.921	0.847	profilin 1 [Source:HGNC Symbol;Acc:HGNC:8881]	GO:0000774(adenyl-nucleotide exchange factor activity);GO:0001843(neural tube closure);GO:0003723(RNA binding);GO:0003779(actin binding);GO:0003785(actin monomer binding);GO:0005515(protein binding);GO:0005546(phosphatidylinositol-4,5-bisphosphate binding);GO:0005634(nucleus);GO:0005737(cytoplasm);GO:0005829(cytosol);GO:0005856(cytoskeleton);GO:0005925(focal adhesion);GO:0005938(cell cortex);GO:0…	04015(Rap1 signaling pathway);04810(Regulation of actin cytoskeleton);05131(Shigellosis);05132(Salmonella infection)	up
ENSG00000109099	PMP22	-1.84708	0	0	0.144	0.516	peripheral myelin protein 22 [Source:HGNC Symbol;Acc:HGNC:9118]	GO:0005515(protein binding);GO:0005886(plasma membrane);GO:0005923(bicellular tight junction);GO:0007268(chemical synaptic transmission);GO:0007422(peripheral nervous system development);GO:0008219(cell death);GO:0008285(negative regulation of cell population proliferation);GO:0010977(negative regulation of neuron projection development);GO:0016020(membrane);GO:0016021(integral component of membr…	NA	down
ENSG00000176974	SHMT1	-0.774444	0	0	0.024	0.248	serine hydroxymethyltransferase 1 [Source:HGNC Symbol;Acc:HGNC:10850]	GO:0000900(translation repressor activity, mRNA regulatory element binding);GO:0003824(catalytic activity);GO:0004372(glycine hydroxymethyltransferase activity);GO:0004843(thiol-dependent ubiquitin-specific protease activity);GO:0005515(protein binding);GO:0005634(nucleus);GO:0005737(cytoplasm);GO:0005829(cytosol);GO:0006231(dTMP biosynthetic process);GO:0006544(glycine metabolic process);GO:0006…	00260(Glycine, serine and threonine metabolism);00630(Glyoxylate and dicarboxylate metabolism);00670(One carbon pool by folate);01523(Antifolate resistance)	down
ENSG00000108691	CCL2	2.92506	0	0	0.44	0.08	C-C motif chemokine ligand 2 [Source:HGNC Symbol;Acc:HGNC:10618]	GO:0000165(MAPK cascade);GO:0001525(angiogenesis);GO:0002548(monocyte chemotaxis);GO:0004672(protein kinase activity);GO:0005102(signaling receptor binding);GO:0005125(cytokine activity);GO:0005515(protein binding);GO:0005576(extracellular region);GO:0005615(extracellular space);GO:0005623(cell);GO:0006468(protein phosphorylation);GO:0006935(chemotaxis);GO:0006954(inflammatory response);GO:000695…	04060(Cytokine-cytokine receptor interaction);04062(Chemokine signaling pathway);04621(NOD-like receptor signaling pathway);04657(IL-17 signaling pathway);04668(TNF signaling pathway);04933(AGE-RAGE signaling pathway in diabetic complications);05142(Chagas disease (American trypanosomiasis));05144(Malaria);05163(Human cytomegalovirus infection);05164(Influenza A);05168(Herpes simplex virus 1 infe…	up
ENSG00000186407	CD300E	1.86896	0	0	0.54	0.062	CD300e molecule [Source:HGNC Symbol;Acc:HGNC:28874]	GO:0002376(immune system process);GO:0005886(plasma membrane);GO:0016020(membrane);GO:0016021(integral component of membrane);GO:0045087(innate immune response);GO:0050776(regulation of immune response)	NA	up
ENSG00000141526	SLC16A3	1.08212	0	0	0.505	0.162	solute carrier family 16 member 3 [Source:HGNC Symbol;Acc:HGNC:10924]	GO:0003723(RNA binding);GO:0005515(protein binding);GO:0005886(plasma membrane);GO:0005887(integral component of plasma membrane);GO:0006090(pyruvate metabolic process);GO:0008028(monocarboxylic acid transmembrane transporter activity);GO:0015129(lactate transmembrane transporter activity);GO:0015293(symporter activity);GO:0015718(monocarboxylic acid transport);GO:0016020(membrane);GO:0016021(int…	05230(Central carbon metabolism in cancer)	up
ENSG00000158270	COLEC12	-1.18533	0	0	0.095	0.443	collectin subfamily member 12 [Source:HGNC Symbol;Acc:HGNC:16016]	GO:0005044(scavenger receptor activity);GO:0005534(galactose binding);GO:0005581(collagen trimer);GO:0005615(extracellular space);GO:0005886(plasma membrane);GO:0006898(receptor-mediated endocytosis);GO:0006910(phagocytosis, recognition);GO:0006952(defense response);GO:0008329(signaling pattern recognition receptor activity);GO:0009756(carbohydrate mediated signaling);GO:0016020(membrane);GO:0016…	04145(Phagosome)	down
ENSG00000088827	SIGLEC1	-1.11594	0	0	0.098	0.456	sialic acid binding Ig like lectin 1 [Source:HGNC Symbol;Acc:HGNC:11127]	GO:0005576(extracellular region);GO:0005886(plasma membrane);GO:0006897(endocytosis);GO:0006954(inflammatory response);GO:0007155(cell adhesion);GO:0007160(cell-matrix adhesion);GO:0016020(membrane);GO:0016021(integral component of membrane);GO:0030246(carbohydrate binding);GO:0098609(cell-cell adhesion)	04514(Cell adhesion molecules (CAMs))	down
ENSG00000178726	THBD	1.33157	0	0	0.644	0.288	thrombomodulin [Source:HGNC Symbol;Acc:HGNC:11784]	GO:0004888(transmembrane signaling receptor activity);GO:0005509(calcium ion binding);GO:0005515(protein binding);GO:0005615(extracellular space);GO:0005774(vacuolar membrane);GO:0005886(plasma membrane);GO:0005887(integral component of plasma membrane);GO:0007565(female pregnancy);GO:0007596(blood coagulation);GO:0007599(hemostasis);GO:0009986(cell surface);GO:0010165(response to X-ray);GO:00105…	04610(Complement and coagulation cascades);04933(AGE-RAGE signaling pathway in diabetic complications);05418(Fluid shear stress and atherosclerosis)	up
ENSG00000101439	CST3	-1.35482	0	0	0.931	0.987	cystatin C [Source:HGNC Symbol;Acc:HGNC:2475]	GO:0001540(amyloid-beta binding);GO:0001654(eye development);GO:0001666(response to hypoxia);GO:0001775(cell activation);GO:0002020(protease binding);GO:0004866(endopeptidase inhibitor activity);GO:0004869(cysteine-type endopeptidase inhibitor activity);GO:0005515(protein binding);GO:0005576(extracellular region);GO:0005604(basement membrane);GO:0005615(extracellular space);GO:0005737(cytoplasm);…	04970(Salivary secretion)	down
ENSG00000100979	PLTP	-2.47247	0	0	0.217	0.807	phospholipid transfer protein [Source:HGNC Symbol;Acc:HGNC:9093]	GO:0005319(lipid transporter activity);GO:0005548(phospholipid transporter activity);GO:0005576(extracellular region);GO:0005615(extracellular space);GO:0006629(lipid metabolic process);GO:0006869(lipid transport);GO:0008289(lipid binding);GO:0008429(phosphatidylethanolamine binding);GO:0008525(phosphatidylcholine transporter activity);GO:0010189(vitamin E biosynthetic process);GO:0010875(positiv…	03320(PPAR signaling pathway);04979(Cholesterol metabolism)	down
ENSG00000087460	GNAS	-0.709929	0	0	0.8	0.937	GNAS complex locus [Source:HGNC Symbol;Acc:HGNC:4392]	GO:0000166(nucleotide binding);GO:0001501(skeletal system development);GO:0001664(G protein-coupled receptor binding);GO:0001726(ruffle);GO:0001894(tissue homeostasis);GO:0001958(endochondral ossification);GO:0003091(renal water homeostasis);GO:0003674(molecular_function);GO:0003924(GTPase activity);GO:0005159(insulin-like growth factor receptor binding);GO:0005515(protein binding);GO:0005525(GTP…	01522(Endocrine resistance);04015(Rap1 signaling pathway);04020(Calcium signaling pathway);04024(cAMP signaling pathway);04072(Phospholipase D signaling pathway);04261(Adrenergic signaling in cardiomyocytes);04270(Vascular smooth muscle contraction);04540(Gap junction);04611(Platelet activation);04713(Circadian entrainment);04714(Thermogenesis);04724(Glutamatergic synapse);04726(Serotonergic syna…	down
ENSG00000197766	CFD	-1.07691	0	0	0.369	0.698	complement factor D [Source:HGNC Symbol;Acc:HGNC:2771]	GO:0002376(immune system process);GO:0002576(platelet degranulation);GO:0004252(serine-type endopeptidase activity);GO:0005576(extracellular region);GO:0005615(extracellular space);GO:0006508(proteolysis);GO:0006956(complement activation);GO:0006957(complement activation, alternative pathway);GO:0008233(peptidase activity);GO:0008236(serine-type peptidase activity);GO:0009617(response to bacteriu…	04610(Complement and coagulation cascades);05150(Staphylococcus aureus infection)	down
ENSG00000099875	MKNK2	-0.969865	0	0	0.157	0.496	MAP kinase interacting serine/threonine kinase 2 [Source:HGNC Symbol;Acc:HGNC:7111]	GO:0000166(nucleotide binding);GO:0004672(protein kinase activity);GO:0004674(protein serine/threonine kinase activity);GO:0004683(calmodulin-dependent protein kinase activity);GO:0005515(protein binding);GO:0005516(calmodulin binding);GO:0005524(ATP binding);GO:0005634(nucleus);GO:0005654(nucleoplasm);GO:0005737(cytoplasm);GO:0006417(regulation of translation);GO:0006468(protein phosphorylation)…	04010(MAPK signaling pathway);04066(HIF-1 signaling pathway);04910(Insulin signaling pathway)	down
ENSG00000104904	OAZ1	0.862579	0	0	0.964	0.916	ornithine decarboxylase antizyme 1 [Source:HGNC Symbol;Acc:HGNC:8095]	GO:0005515(protein binding);GO:0005634(nucleus);GO:0005737(cytoplasm);GO:0005829(cytosol);GO:0006521(regulation of cellular amino acid metabolic process);GO:0006595(polyamine metabolic process);GO:0006596(polyamine biosynthetic process);GO:0008073(ornithine decarboxylase inhibitor activity);GO:0043086(negative regulation of catalytic activity);GO:0045732(positive regulation of protein catabolic p…	NA	up
ENSG00000132002	DNAJB1	-1.56916	0	0	0.551	0.91	DnaJ heat shock protein family (Hsp40) member B1 [Source:HGNC Symbol;Acc:HGNC:5270]	GO:0000122(negative regulation of transcription by RNA polymerase II);GO:0001671(ATPase activator activity);GO:0003714(transcription corepressor activity);GO:0005515(protein binding);GO:0005634(nucleus);GO:0005654(nucleoplasm);GO:0005730(nucleolus);GO:0005737(cytoplasm);GO:0005829(cytosol);GO:0006457(protein folding);GO:0006986(response to unfolded protein);GO:0014069(postsynaptic density);GO:003…	04141(Protein processing in endoplasmic reticulum);05164(Influenza A)	down
ENSG00000127528	KLF2	-1.16842	0	0	0.397	0.693	Kruppel like factor 2 [Source:HGNC Symbol;Acc:HGNC:6347]	GO:0000122(negative regulation of transcription by RNA polymerase II);GO:0000790(nuclear chromatin);GO:0000902(cell morphogenesis);GO:0000981(DNA-binding transcription factor activity, RNA polymerase II-specific);GO:0001701(in utero embryonic development);GO:0003676(nucleic acid binding);GO:0003677(DNA binding);GO:0003700(DNA-binding transcription factor activity);GO:0005515(protein binding);GO:0…	04068(FoxO signaling pathway);04371(Apelin signaling pathway);05418(Fluid shear stress and atherosclerosis)	down
ENSG00000142227	EMP3	1.59454	0	0	0.902	0.621	epithelial membrane protein 3 [Source:HGNC Symbol;Acc:HGNC:3335]	GO:0005515(protein binding);GO:0005886(plasma membrane);GO:0008219(cell death);GO:0008285(negative regulation of cell population proliferation);GO:0016020(membrane);GO:0016021(integral component of membrane);GO:0016049(cell growth);GO:0032060(bleb assembly)	NA	up
ENSG00000105609	LILRB5	-1.22061	0	0	0.055	0.375	leukocyte immunoglobulin like receptor B5 [Source:HGNC Symbol;Acc:HGNC:6609]	GO:0002250(adaptive immune response);GO:0002376(immune system process);GO:0004888(transmembrane signaling receptor activity);GO:0006952(defense response);GO:0007166(cell surface receptor signaling pathway);GO:0016020(membrane);GO:0016021(integral component of membrane)	04380(Osteoclast differentiation)	down
ENSG00000240972	MIF	1.40381	0	0	0.481	0.103	macrophage migration inhibitory factor [Source:HGNC Symbol;Acc:HGNC:7097]	GO:0001516(prostaglandin biosynthetic process);GO:0001934(positive regulation of protein phosphorylation);GO:0002020(protease binding);GO:0002376(immune system process);GO:0002906(negative regulation of mature B cell apoptotic process);GO:0004167(dopachrome isomerase activity);GO:0005102(signaling receptor binding);GO:0005125(cytokine activity);GO:0005126(cytokine receptor binding);GO:0005515(pro…	00350(Tyrosine metabolism);00360(Phenylalanine metabolism)	up
ENSG00000100097	LGALS1	1.81627	0	0	0.949	0.726	galectin 1 [Source:HGNC Symbol;Acc:HGNC:6561]	GO:0002317(plasma cell differentiation);GO:0003723(RNA binding);GO:0005515(protein binding);GO:0005576(extracellular region);GO:0005615(extracellular space);GO:0005622(intracellular);GO:0005634(nucleus);GO:0005737(cytoplasm);GO:0005788(endoplasmic reticulum lumen);GO:0005829(cytosol);GO:0006915(apoptotic process);GO:0009986(cell surface);GO:0010812(negative regulation of cell-substrate adhesion);…	NA	up
ENSG00000025708	TYMP	1.82479	0	0	0.88	0.49	thymidine phosphorylase [Source:HGNC Symbol;Acc:HGNC:3148]	GO:0000002(mitochondrial genome maintenance);GO:0001525(angiogenesis);GO:0004645(phosphorylase activity);GO:0005829(cytosol);GO:0006206(pyrimidine nucleobase metabolic process);GO:0006213(pyrimidine nucleoside metabolic process);GO:0006935(chemotaxis);GO:0007275(multicellular organism development);GO:0008083(growth factor activity);GO:0009032(thymidine phosphorylase activity);GO:0010469(regulatio…	00240(Pyrimidine metabolism);00983(Drug metabolism - other enzymes);05219(Bladder cancer)	up
ENSG00000178695	KCTD12	-0.832004	0	0	0.625	0.841	potassium channel tetramerization domain containing 12 [Source:HGNC Symbol;Acc:HGNC:14678]	GO:0003723(RNA binding);GO:0005515(protein binding);GO:0005886(plasma membrane);GO:0016020(membrane);GO:0030054(cell junction);GO:0042734(presynaptic membrane);GO:0042802(identical protein binding);GO:0045202(synapse);GO:0045211(postsynaptic membrane);GO:0051260(protein homooligomerization)	NA	down
ENSG00000169756	LIMS1	1.03007	0	0	0.719	0.468	LIM zinc finger domain containing 1 [Source:HGNC Symbol;Acc:HGNC:6616]	GO:0005515(protein binding);GO:0005829(cytosol);GO:0005886(plasma membrane);GO:0005911(cell-cell junction);GO:0005925(focal adhesion);GO:0007569(cell aging);GO:0008270(zinc ion binding);GO:0010628(positive regulation of gene expression);GO:0010811(positive regulation of cell-substrate adhesion);GO:0016020(membrane);GO:0019901(protein kinase binding);GO:0030054(cell junction);GO:0032991(protein-co…	NA	up
ENSG00000204257	HLA-DMA	-0.895297	0	0	0.222	0.561	major histocompatibility complex, class II, DM alpha [Source:HGNC Symbol;Acc:HGNC:4934]	GO:0002376(immune system process);GO:0002503(peptide antigen assembly with MHC class II protein complex);GO:0002504(antigen processing and presentation of peptide or polysaccharide antigen via MHC class II);GO:0005515(protein binding);GO:0005764(lysosome);GO:0005765(lysosomal membrane);GO:0005768(endosome);GO:0006955(immune response);GO:0009986(cell surface);GO:0016020(membrane);GO:0016021(integr…	04145(Phagosome);04514(Cell adhesion molecules (CAMs));04612(Antigen processing and presentation);04640(Hematopoietic cell lineage);04658(Th1 and Th2 cell differentiation);04659(Th17 cell differentiation);04672(Intestinal immune network for IgA production);04940(Type I diabetes mellitus);05140(Leishmaniasis);05145(Toxoplasmosis);05150(Staphylococcus aureus infection);05152(Tuberculosis);05164(Inf…	down
ENSG00000137491	SLCO2B1	-1.01677	0	0	0.276	0.58	solute carrier organic anion transporter family member 2B1 [Source:HGNC Symbol;Acc:HGNC:10962]	GO:0001889(liver development);GO:0005215(transporter activity);GO:0005515(protein binding);GO:0005886(plasma membrane);GO:0005887(integral component of plasma membrane);GO:0006811(ion transport);GO:0008514(organic anion transmembrane transporter activity);GO:0015125(bile acid transmembrane transporter activity);GO:0015347(sodium-independent organic anion transmembrane transporter activity);GO:001…	NA	down
ENSG00000136026	CKAP4	1.00186	0	0	0.371	0.063	cytoskeleton associated protein 4 [Source:NCBI gene;Acc:10970]	GO:0003723(RNA binding);GO:0005737(cytoplasm);GO:0005783(endoplasmic reticulum);GO:0005788(endoplasmic reticulum lumen);GO:0005789(endoplasmic reticulum membrane);GO:0005791(rough endoplasmic reticulum);GO:0005811(lipid droplet);GO:0005829(cytosol);GO:0005856(cytoskeleton);GO:0005886(plasma membrane);GO:0016020(membrane);GO:0016021(integral component of membrane);GO:0016607(nuclear speck);GO:0035…	04141(Protein processing in endoplasmic reticulum)	up
ENSG00000048740	CELF2	-0.913319	0	0	0.383	0.694	CUGBP Elav-like family member 2 [Source:HGNC Symbol;Acc:HGNC:2550]	GO:0000381(regulation of alternative mRNA splicing, via spliceosome);GO:0003676(nucleic acid binding);GO:0003723(RNA binding);GO:0003729(mRNA binding);GO:0005634(nucleus);GO:0005737(cytoplasm);GO:0006376(mRNA splice site selection);GO:0006396(RNA processing);GO:0006397(mRNA processing);GO:0008016(regulation of heart contraction);GO:0036002(pre-mRNA binding);GO:1990904(ribonucleoprotein complex)	NA	down
ENSG00000185043	CIB1	1.02366	0	0	0.533	0.207	calcium and integrin binding 1 [Source:HGNC Symbol;Acc:HGNC:16920]	GO:0001525(angiogenesis);GO:0001933(negative regulation of protein phosphorylation);GO:0001934(positive regulation of protein phosphorylation);GO:0001954(positive regulation of cell-matrix adhesion);GO:0002931(response to ischemia);GO:0005509(calcium ion binding);GO:0005515(protein binding);GO:0005634(nucleus);GO:0005654(nucleoplasm);GO:0005737(cytoplasm);GO:0005783(endoplasmic reticulum);GO:0005…	NA	up
ENSG00000167460	TPM4	0.915879	0	0	0.762	0.554	tropomyosin 4 [Source:HGNC Symbol;Acc:HGNC:12013]	GO:0001649(osteoblast differentiation);GO:0001725(stress fiber);GO:0002102(podosome);GO:0003779(actin binding);GO:0005509(calcium ion binding);GO:0005515(protein binding);GO:0005737(cytoplasm);GO:0005829(cytosol);GO:0005856(cytoskeleton);GO:0005862(muscle thin filament tropomyosin);GO:0005884(actin filament);GO:0005925(focal adhesion);GO:0006936(muscle contraction);GO:0007015(actin filament organ…	04260(Cardiac muscle contraction);04261(Adrenergic signaling in cardiomyocytes);05410(Hypertrophic cardiomyopathy (HCM));05414(Dilated cardiomyopathy (DCM))	up
ENSG00000169432	SCN9A	-0.758754	0	0	0.005	0.161	sodium voltage-gated channel alpha subunit 9 [Source:HGNC Symbol;Acc:HGNC:10597]	GO:0001518(voltage-gated sodium channel complex);GO:0005216(ion channel activity);GO:0005244(voltage-gated ion channel activity);GO:0005248(voltage-gated sodium channel activity);GO:0005272(sodium channel activity);GO:0005515(protein binding);GO:0005886(plasma membrane);GO:0005887(integral component of plasma membrane);GO:0006811(ion transport);GO:0006814(sodium ion transport);GO:0006954(inflamma…	04742(Taste transduction)	down
ENSG00000155962	CLIC2	-0.644049	0	2.51293e-307	0.021	0.225	chloride intracellular channel 2 [Source:HGNC Symbol;Acc:HGNC:2063]	GO:0004602(glutathione peroxidase activity);GO:0005244(voltage-gated ion channel activity);GO:0005254(chloride channel activity);GO:0005515(protein binding);GO:0005622(intracellular);GO:0005634(nucleus);GO:0005737(cytoplasm);GO:0006811(ion transport);GO:0006821(chloride transport);GO:0007165(signal transduction);GO:0010880(regulation of release of sequestered calcium ion into cytosol by sarcoplas…	NA	down
ENSG00000174600	CMKLR1	-0.804153	0	3.38411e-307	0.064	0.323	chemerin chemokine-like receptor 1 [Source:HGNC Symbol;Acc:HGNC:2121]	GO:0001501(skeletal system development);GO:0002430(complement receptor mediated signaling pathway);GO:0004930(G protein-coupled receptor activity);GO:0004950(chemokine receptor activity);GO:0005515(protein binding);GO:0005886(plasma membrane);GO:0005887(integral component of plasma membrane);GO:0006935(chemotaxis);GO:0006954(inflammatory response);GO:0006955(immune response);GO:0007165(signal tra…	NA	down
ENSG00000110700	RPS13	-0.727814	0	1.34029e-305	0.866	0.95	ribosomal protein S13 [Source:HGNC Symbol;Acc:HGNC:10386]	GO:0000184(nuclear-transcribed mRNA catabolic process, nonsense-mediated decay);GO:0003723(RNA binding);GO:0003729(mRNA binding);GO:0003735(structural constituent of ribosome);GO:0005515(protein binding);GO:0005622(intracellular);GO:0005634(nucleus);GO:0005654(nucleoplasm);GO:0005730(nucleolus);GO:0005829(cytosol);GO:0005840(ribosome);GO:0005925(focal adhesion);GO:0006412(translation);GO:0006413(…	03010(Ribosome)	down
ENSG00000170571	EMB	-1.00285	0	4.39482e-305	0.224	0.517	embigin [Source:HGNC Symbol;Acc:HGNC:30465]	GO:0005886(plasma membrane);GO:0005887(integral component of plasma membrane);GO:0007156(homophilic cell adhesion via plasma membrane adhesion molecules);GO:0007411(axon guidance);GO:0016020(membrane);GO:0016021(integral component of membrane);GO:0030054(cell junction);GO:0030424(axon);GO:0035879(plasma membrane lactate transport);GO:0045202(synapse);GO:0070593(dendrite self-avoidance);GO:0098632…	NA	down
ENSG00000089220	PEBP1	-0.929382	8.09471e-308	3.51586e-303	0.227	0.542	phosphatidylethanolamine binding protein 1 [Source:HGNC Symbol;Acc:HGNC:8630]	GO:0000165(MAPK cascade);GO:0000166(nucleotide binding);GO:0001505(regulation of neurotransmitter levels);GO:0002026(regulation of the force of heart contraction);GO:0003723(RNA binding);GO:0004867(serine-type endopeptidase inhibitor activity);GO:0005102(signaling receptor binding);GO:0005515(protein binding);GO:0005524(ATP binding);GO:0005615(extracellular space);GO:0005634(nucleus);GO:0005737(c…	NA	down
ENSG00000107562	CXCL12	-0.781078	1.23532e-307	5.36549e-303	0.02	0.214	C-X-C motif chemokine ligand 12 [Source:HGNC Symbol;Acc:HGNC:10672]	GO:0001666(response to hypoxia);GO:0001764(neuron migration);GO:0001938(positive regulation of endothelial cell proliferation);GO:0005102(signaling receptor binding);GO:0005125(cytokine activity);GO:0005178(integrin binding);GO:0005515(protein binding);GO:0005576(extracellular region);GO:0005615(extracellular space);GO:0005634(nucleus);GO:0005737(cytoplasm);GO:0005886(plasma membrane);GO:0006874(…	04060(Cytokine-cytokine receptor interaction);04062(Chemokine signaling pathway);04064(NF-kappa B signaling pathway);04360(Axon guidance);04670(Leukocyte transendothelial migration);04672(Intestinal immune network for IgA production);04810(Regulation of actin cytoskeleton);05163(Human cytomegalovirus infection);05200(Pathways in cancer);05323(Rheumatoid arthritis)	down
ENSG00000161970	RPL26	-0.767574	2.11186e-306	9.17266e-302	0.744	0.887	ribosomal protein L26 [Source:HGNC Symbol;Acc:HGNC:10327]	GO:0000184(nuclear-transcribed mRNA catabolic process, nonsense-mediated decay);GO:0002181(cytoplasmic translation);GO:0003723(RNA binding);GO:0003735(structural constituent of ribosome);GO:0005515(protein binding);GO:0005622(intracellular);GO:0005654(nucleoplasm);GO:0005730(nucleolus);GO:0005737(cytoplasm);GO:0005829(cytosol);GO:0005840(ribosome);GO:0006364(rRNA processing);GO:0006412(translatio…	03010(Ribosome)	down
ENSG00000177954	RPS27	-0.731235	4.80703e-306	2.08788e-301	0.879	0.963	ribosomal protein S27 [Source:HGNC Symbol;Acc:HGNC:10416]	GO:0000028(ribosomal small subunit assembly);GO:0000184(nuclear-transcribed mRNA catabolic process, nonsense-mediated decay);GO:0003677(DNA binding);GO:0003723(RNA binding);GO:0003735(structural constituent of ribosome);GO:0005515(protein binding);GO:0005622(intracellular);GO:0005634(nucleus);GO:0005654(nucleoplasm);GO:0005829(cytosol);GO:0005840(ribosome);GO:0006364(rRNA processing);GO:0006412(t…	03010(Ribosome)	down
ENSG00000196735	HLA-DQA1	-0.967365	3.83552e-305	1.66592e-300	0.075	0.337	major histocompatibility complex, class II, DQ alpha 1 [Source:HGNC Symbol;Acc:HGNC:4942]	GO:0000139(Golgi membrane);GO:0002376(immune system process);GO:0002504(antigen processing and presentation of peptide or polysaccharide antigen via MHC class II);GO:0005515(protein binding);GO:0005764(lysosome);GO:0005765(lysosomal membrane);GO:0005768(endosome);GO:0005783(endoplasmic reticulum);GO:0005789(endoplasmic reticulum membrane);GO:0005794(Golgi apparatus);GO:0005886(plasma membrane);GO…	04145(Phagosome);04514(Cell adhesion molecules (CAMs));04612(Antigen processing and presentation);04640(Hematopoietic cell lineage);04658(Th1 and Th2 cell differentiation);04659(Th17 cell differentiation);04672(Intestinal immune network for IgA production);04940(Type I diabetes mellitus);05140(Leishmaniasis);05145(Toxoplasmosis);05150(Staphylococcus aureus infection);05152(Tuberculosis);05164(Inf…	down
ENSG00000145431	PDGFC	-0.72358	5.35556e-303	2.32613e-298	0.036	0.258	platelet derived growth factor C [Source:HGNC Symbol;Acc:HGNC:8801]	GO:0000139(Golgi membrane);GO:0005161(platelet-derived growth factor receptor binding);GO:0005515(protein binding);GO:0005576(extracellular region);GO:0005615(extracellular space);GO:0005634(nucleus);GO:0005737(cytoplasm);GO:0005788(endoplasmic reticulum lumen);GO:0005829(cytosol);GO:0005886(plasma membrane);GO:0007171(activation of transmembrane receptor protein tyrosine kinase activity);GO:0007…	01521(EGFR tyrosine kinase inhibitor resistance);04010(MAPK signaling pathway);04014(Ras signaling pathway);04015(Rap1 signaling pathway);04072(Phospholipase D signaling pathway);04151(PI3K-Akt signaling pathway);04510(Focal adhesion);04540(Gap junction);04810(Regulation of actin cytoskeleton);05215(Prostate cancer);05218(Melanoma);05231(Choline metabolism in cancer)	down
ENSG00000169413	RNASE6	-0.899762	5.01144e-301	2.17667e-296	0.285	0.611	ribonuclease A family member k6 [Source:HGNC Symbol;Acc:HGNC:10048]	GO:0003676(nucleic acid binding);GO:0004518(nuclease activity);GO:0004519(endonuclease activity);GO:0004540(ribonuclease activity);GO:0005576(extracellular region);GO:0005615(extracellular space);GO:0005764(lysosome);GO:0006401(RNA catabolic process);GO:0006952(defense response);GO:0016787(hydrolase activity);GO:0019730(antimicrobial humoral response);GO:0019731(antibacterial humoral response);GO…	NA	down
ENSG00000149131	SERPING1	-0.810534	2.87814e-300	1.25009e-295	0.052	0.291	serpin family G member 1 [Source:HGNC Symbol;Acc:HGNC:1228]	GO:0001869(negative regulation of complement activation, lectin pathway);GO:0002376(immune system process);GO:0002576(platelet degranulation);GO:0004867(serine-type endopeptidase inhibitor activity);GO:0005515(protein binding);GO:0005576(extracellular region);GO:0005615(extracellular space);GO:0006958(complement activation, classical pathway);GO:0007568(aging);GO:0007596(blood coagulation);GO:000…	04610(Complement and coagulation cascades);05133(Pertussis)	down
ENSG00000108688	CCL7	1.53807	2.21324e-299	9.61298e-295	0.218	0.001	C-C motif chemokine ligand 7 [Source:HGNC Symbol;Acc:HGNC:10634]	GO:0002548(monocyte chemotaxis);GO:0005125(cytokine activity);GO:0005515(protein binding);GO:0005576(extracellular region);GO:0005615(extracellular space);GO:0005623(cell);GO:0006874(cellular calcium ion homeostasis);GO:0006935(chemotaxis);GO:0006954(inflammatory response);GO:0006955(immune response);GO:0007010(cytoskeleton organization);GO:0007165(signal transduction);GO:0007186(G protein-couple…	04060(Cytokine-cytokine receptor interaction);04062(Chemokine signaling pathway);04657(IL-17 signaling pathway)	up
ENSG00000167601	AXL	-0.674164	1.09319e-296	4.74817e-292	0.017	0.198	AXL receptor tyrosine kinase [Source:HGNC Symbol;Acc:HGNC:905]	GO:0000166(nucleotide binding);GO:0001618(virus receptor activity);GO:0001764(neuron migration);GO:0001779(natural killer cell differentiation);GO:0001786(phosphatidylserine binding);GO:0001818(negative regulation of cytokine production);GO:0001961(positive regulation of cytokine-mediated signaling pathway);GO:0001974(blood vessel remodeling);GO:0002376(immune system process);GO:0004672(protein k…	01521(EGFR tyrosine kinase inhibitor resistance)	down
ENSG00000124731	TREM1	1.06785	2.10219e-296	9.13066e-292	0.412	0.107	triggering receptor expressed on myeloid cells 1 [Source:HGNC Symbol;Acc:HGNC:17760]	GO:0002526(acute inflammatory response);GO:0005576(extracellular region);GO:0005886(plasma membrane);GO:0006959(humoral immune response);GO:0016020(membrane);GO:0016021(integral component of membrane);GO:0035556(intracellular signal transduction);GO:0038023(signaling receptor activity);GO:0045087(innate immune response);GO:0050776(regulation of immune response);GO:0050900(leukocyte migration);GO:…	NA	up
ENSG00000229807	XIST	1.2199	7.23282e-293	3.1415e-288	0.208	0	X inactive specific transcript [Source:HGNC Symbol;Acc:HGNC:12810]	NA	NA	up
ENSG00000179218	CALR	0.96339	1.49468e-292	6.49198e-288	0.764	0.598	calreticulin [Source:HGNC Symbol;Acc:HGNC:1455]	GO:0000122(negative regulation of transcription by RNA polymerase II);GO:0001669(acrosomal vesicle);GO:0001849(complement component C1q binding);GO:0002474(antigen processing and presentation of peptide antigen via MHC class I);GO:0002479(antigen processing and presentation of exogenous peptide antigen via MHC class I, TAP-dependent);GO:0002502(peptide antigen assembly with MHC class I protein co…	04141(Protein processing in endoplasmic reticulum);04145(Phagosome);04612(Antigen processing and presentation);05142(Chagas disease (American trypanosomiasis));05163(Human cytomegalovirus infection);05166(Human T-cell leukemia virus 1 infection);05168(Herpes simplex virus 1 infection);05169(Epstein-Barr virus infection);05170(Human immunodeficiency virus 1 infection)	up
ENSG00000144381	HSPD1	-0.906622	1.73293e-292	7.52679e-288	0.583	0.798	heat shock protein family D (Hsp60) member 1 [Source:HGNC Symbol;Acc:HGNC:5261]	GO:0000166(nucleotide binding);GO:0001530(lipopolysaccharide binding);GO:0002039(p53 binding);GO:0002368(B cell cytokine production);GO:0002755(MyD88-dependent toll-like receptor signaling pathway);GO:0002842(positive regulation of T cell mediated immune response to tumor cell);GO:0003688(DNA replication origin binding);GO:0003697(single-stranded DNA binding);GO:0003723(RNA binding);GO:0003725(do…	03018(RNA degradation);04940(Type I diabetes mellitus);05134(Legionellosis);05152(Tuberculosis)	down
ENSG00000174944	P2RY14	-0.549876	1.85018e-292	8.03608e-288	0.001	0.131	purinergic receptor P2Y14 [Source:HGNC Symbol;Acc:HGNC:16442]	GO:0004930(G protein-coupled receptor activity);GO:0005886(plasma membrane);GO:0007165(signal transduction);GO:0007186(G protein-coupled receptor signaling pathway);GO:0016020(membrane);GO:0016021(integral component of membrane);GO:0035589(G protein-coupled purinergic nucleotide receptor signaling pathway);GO:0045028(G protein-coupled purinergic nucleotide receptor activity);GO:0045029(UDP-activa…	04080(Neuroactive ligand-receptor interaction)	down
ENSG00000112394	SLC16A10	1.33227	2.10654e-292	9.14955e-288	0.387	0.094	solute carrier family 16 member 10 [Source:HGNC Symbol;Acc:HGNC:17027]	GO:0003333(amino acid transmembrane transport);GO:0005886(plasma membrane);GO:0005887(integral component of plasma membrane);GO:0006865(amino acid transport);GO:0015171(amino acid transmembrane transporter activity);GO:0015173(aromatic amino acid transmembrane transporter activity);GO:0015349(thyroid hormone transmembrane transporter activity);GO:0015801(aromatic amino acid transport);GO:0016020(…	04919(Thyroid hormone signaling pathway);04974(Protein digestion and absorption)	up
ENSG00000167779	IGFBP6	-0.75731	2.10007e-291	9.12143e-287	0.041	0.267	insulin like growth factor binding protein 6 [Source:HGNC Symbol;Acc:HGNC:5475]	GO:0001968(fibronectin binding);GO:0005102(signaling receptor binding);GO:0005520(insulin-like growth factor binding);GO:0005576(extracellular region);GO:0005615(extracellular space);GO:0005737(cytoplasm);GO:0005794(Golgi apparatus);GO:0007165(signal transduction);GO:0008285(negative regulation of cell population proliferation);GO:0019838(growth factor binding);GO:0031994(insulin-like growth fact…	NA	down
ENSG00000143153	ATP1B1	-0.803683	2.36388e-288	1.02673e-283	0.07	0.313	ATPase Na+/K+ transporting subunit beta 1 [Source:HGNC Symbol;Acc:HGNC:804]	GO:0001666(response to hypoxia);GO:0001671(ATPase activator activity);GO:0005391(sodium:potassium-exchanging ATPase activity);GO:0005515(protein binding);GO:0005524(ATP binding);GO:0005886(plasma membrane);GO:0005890(sodium:potassium-exchanging ATPase complex);GO:0005901(caveola);GO:0006811(ion transport);GO:0006813(potassium ion transport);GO:0006814(sodium ion transport);GO:0006874(cellular cal…	04022(cGMP-PKG signaling pathway);04024(cAMP signaling pathway);04260(Cardiac muscle contraction);04261(Adrenergic signaling in cardiomyocytes);04911(Insulin secretion);04918(Thyroid hormone synthesis);04919(Thyroid hormone signaling pathway);04925(Aldosterone synthesis and secretion);04960(Aldosterone-regulated sodium reabsorption);04961(Endocrine and other factor-regulated calcium reabsorption)…	down
ENSG00000276085	CCL3L1	1.69229	4.70801e-287	2.04488e-282	0.549	0.27	C-C motif chemokine ligand 3 like 1 [Source:HGNC Symbol;Acc:HGNC:10628]	GO:0002548(monocyte chemotaxis);GO:0005125(cytokine activity);GO:0005576(extracellular region);GO:0005615(extracellular space);GO:0006935(chemotaxis);GO:0006954(inflammatory response);GO:0006955(immune response);GO:0007186(G protein-coupled receptor signaling pathway);GO:0008009(chemokine activity);GO:0008285(negative regulation of cell population proliferation);GO:0010469(regulation of signaling…	04060(Cytokine-cytokine receptor interaction);04062(Chemokine signaling pathway);04620(Toll-like receptor signaling pathway);05132(Salmonella infection);05142(Chagas disease (American trypanosomiasis));05163(Human cytomegalovirus infection);05323(Rheumatoid arthritis)	up
ENSG00000167604	AD000864.1	-0.956317	1.15938e-281	5.03567e-277	0.193	0.483	NFKB inhibitor delta [Source:NCBI gene;Acc:84807]	GO:0005515(protein binding);GO:0005634(nucleus);GO:0006954(inflammatory response);GO:0032088(negative regulation of NF-kappaB transcription factor activity);GO:0033085(negative regulation of T cell differentiation in thymus);GO:0043124(negative regulation of I-kappaB kinase/NF-kappaB signaling);GO:0050852(T cell receptor signaling pathway);GO:0051059(NF-kappaB binding);GO:0070245(positive regulat…	NA	down
ENSG00000147454	SLC25A37	1.21588	3.4406e-280	1.49439e-275	0.515	0.214	solute carrier family 25 member 37 [Source:HGNC Symbol;Acc:HGNC:29786]	GO:0005381(iron ion transmembrane transporter activity);GO:0005739(mitochondrion);GO:0005743(mitochondrial inner membrane);GO:0006811(ion transport);GO:0016020(membrane);GO:0016021(integral component of membrane);GO:0022857(transmembrane transporter activity);GO:0048250(iron import into the mitochondrion);GO:0055072(iron ion homeostasis);GO:0055085(transmembrane transport)	NA	up
ENSG00000163492	CCDC141	-0.608794	7.02493e-279	3.05121e-274	0.002	0.134	coiled-coil domain containing 141 [Source:HGNC Symbol;Acc:HGNC:26821]	GO:0005515(protein binding);GO:0005737(cytoplasm);GO:0005815(microtubule organizing center);GO:0005856(cytoskeleton)	NA	down
ENSG00000183696	UPP1	0.988055	1.71786e-278	7.46134e-274	0.616	0.327	uridine phosphorylase 1 [Source:HGNC Symbol;Acc:HGNC:12576]	GO:0003824(catalytic activity);GO:0004850(uridine phosphorylase activity);GO:0005634(nucleus);GO:0005654(nucleoplasm);GO:0005737(cytoplasm);GO:0005829(cytosol);GO:0006139(nucleobase-containing compound metabolic process);GO:0006218(uridine catabolic process);GO:0006220(pyrimidine nucleotide metabolic process);GO:0009116(nucleoside metabolic process);GO:0009166(nucleotide catabolic process);GO:001…	00240(Pyrimidine metabolism);00983(Drug metabolism - other enzymes)	up
ENSG00000133657	ATP13A3	1.03453	2.11209e-278	9.17367e-274	0.565	0.275	ATPase 13A3 [Source:HGNC Symbol;Acc:HGNC:24113]	GO:0000166(nucleotide binding);GO:0005524(ATP binding);GO:0005623(cell);GO:0006812(cation transport);GO:0006874(cellular calcium ion homeostasis);GO:0016020(membrane);GO:0016021(integral component of membrane);GO:0016787(hydrolase activity);GO:0016887(ATPase activity);GO:0046872(metal ion binding)	NA	up
ENSG00000169230	PRELID1	0.96522	4.40605e-278	1.91372e-273	0.554	0.264	PRELI domain containing 1 [Source:HGNC Symbol;Acc:HGNC:30255]	GO:0005515(protein binding);GO:0005654(nucleoplasm);GO:0005739(mitochondrion);GO:0005758(mitochondrial intermembrane space);GO:0006869(lipid transport);GO:0006915(apoptotic process);GO:0006955(immune response);GO:0007275(multicellular organism development);GO:0010917(negative regulation of mitochondrial membrane potential);GO:0010950(positive regulation of endopeptidase activity);GO:0015914(phosp…	NA	up
ENSG00000028277	POU2F2	-0.939638	4.63319e-278	2.01238e-273	0.217	0.525	POU class 2 homeobox 2 [Source:HGNC Symbol;Acc:HGNC:9213]	GO:0000978(RNA polymerase II proximal promoter sequence-specific DNA binding);GO:0000981(DNA-binding transcription factor activity, RNA polymerase II-specific);GO:0001228(DNA-binding transcription activator activity, RNA polymerase II-specific);GO:0002335(mature B cell differentiation);GO:0002380(immunoglobulin secretion involved in immune response);GO:0003677(DNA binding);GO:0003700(DNA-binding …	05168(Herpes simplex virus 1 infection)	down
ENSG00000105246	EBI3	-0.448237	6.22909e-274	2.70554e-269	0.005	0.147	Epstein-Barr virus induced 3 [Source:HGNC Symbol;Acc:HGNC:3129]	GO:0004896(cytokine receptor activity);GO:0004897(ciliary neurotrophic factor receptor activity);GO:0005125(cytokine activity);GO:0005515(protein binding);GO:0005576(extracellular region);GO:0005615(extracellular space);GO:0005788(endoplasmic reticulum lumen);GO:0005886(plasma membrane);GO:0006959(humoral immune response);GO:0009897(external side of plasma membrane);GO:0010469(regulation of signa…	NA	down
ENSG00000179163	FUCA1	-0.891441	6.69859e-273	2.90946e-268	0.09	0.334	alpha-L-fucosidase 1 [Source:HGNC Symbol;Acc:HGNC:4006]	GO:0004560(alpha-L-fucosidase activity);GO:0005576(extracellular region);GO:0005737(cytoplasm);GO:0005764(lysosome);GO:0005975(carbohydrate metabolic process);GO:0006004(fucose metabolic process);GO:0006027(glycosaminoglycan catabolic process);GO:0008152(metabolic process);GO:0016139(glycoside catabolic process);GO:0016787(hydrolase activity);GO:0016798(hydrolase activity, acting on glycosyl bond…	00511(Other glycan degradation);04142(Lysosome)	down
ENSG00000158195	WASF2	-0.812068	2.23796e-272	9.72037e-268	0.425	0.694	WAS protein family member 2 [Source:HGNC Symbol;Acc:HGNC:12733]	GO:0001525(angiogenesis);GO:0001667(ameboidal-type cell migration);GO:0001726(ruffle);GO:0003779(actin binding);GO:0005515(protein binding);GO:0005737(cytoplasm);GO:0005769(early endosome);GO:0005829(cytosol);GO:0005856(cytoskeleton);GO:0005911(cell-cell junction);GO:0006897(endocytosis);GO:0007188(adenylate cyclase-modulating G protein-coupled receptor signaling pathway);GO:0010592(positive regu…	04520(Adherens junction);04666(Fc gamma R-mediated phagocytosis);04810(Regulation of actin cytoskeleton);05100(Bacterial invasion of epithelial cells);05131(Shigellosis);05132(Salmonella infection);05231(Choline metabolism in cancer)	down
ENSG00000212907	MT-ND4L	0.920479	1.84317e-271	8.00562e-267	0.793	0.6	mitochondrially encoded NADH:ubiquinone oxidoreductase core subunit 4L [Source:HGNC Symbol;Acc:HGNC:7460]	GO:0005739(mitochondrion);GO:0005747(mitochondrial respiratory chain complex I);GO:0006120(mitochondrial electron transport, NADH to ubiquinone);GO:0008137(NADH dehydrogenase (ubiquinone) activity);GO:0016020(membrane);GO:0016021(integral component of membrane);GO:0016491(oxidoreductase activity);GO:0016651(oxidoreductase activity, acting on NAD(P)H);GO:0030964(NADH dehydrogenase complex);GO:0031…	00190(Oxidative phosphorylation);04714(Thermogenesis);04723(Retrograde endocannabinoid signaling);05012(Parkinson disease)	up
ENSG00000133639	BTG1	0.929563	4.38418e-270	1.90422e-265	0.889	0.789	BTG anti-proliferation factor 1 [Source:HGNC Symbol;Acc:HGNC:1130]	GO:0003712(transcription coregulator activity);GO:0005515(protein binding);GO:0005634(nucleus);GO:0005654(nucleoplasm);GO:0005737(cytoplasm);GO:0006355(regulation of transcription, DNA-templated);GO:0008285(negative regulation of cell population proliferation);GO:0016477(cell migration);GO:0019899(enzyme binding);GO:0019900(kinase binding);GO:0030308(negative regulation of cell growth);GO:0045603…	03018(RNA degradation)	up
ENSG00000110719	TCIRG1	0.93677	2.22062e-269	9.64506e-265	0.49	0.183	T cell immune regulator 1, ATPase H+ transporting V0 subunit a3 [Source:HGNC Symbol;Acc:HGNC:11647]	GO:0000220(vacuolar proton-transporting V-type ATPase, V0 domain);GO:0001503(ossification);GO:0002158(osteoclast proliferation);GO:0002377(immunoglobulin production);GO:0005215(transporter activity);GO:0005634(nucleus);GO:0005764(lysosome);GO:0005765(lysosomal membrane);GO:0005770(late endosome);GO:0005886(plasma membrane);GO:0005887(integral component of plasma membrane);GO:0006811(ion transport…	00190(Oxidative phosphorylation);04142(Lysosome);04145(Phagosome);04721(Synaptic vesicle cycle);04966(Collecting duct acid secretion);05110(Vibrio cholerae infection);05120(Epithelial cell signaling in Helicobacter pylori infection);05152(Tuberculosis);05165(Human papillomavirus infection);05323(Rheumatoid arthritis)	up
ENSG00000106991	ENG	0.990848	6.49842e-269	2.82252e-264	0.528	0.254	endoglin [Source:HGNC Symbol;Acc:HGNC:3349]	GO:0001300(chronological cell aging);GO:0001525(angiogenesis);GO:0001569(branching involved in blood vessel morphogenesis);GO:0001570(vasculogenesis);GO:0001934(positive regulation of protein phosphorylation);GO:0001947(heart looping);GO:0003148(outflow tract septum morphogenesis);GO:0003198(epithelial to mesenchymal transition involved in endocardial cushion formation);GO:0003203(endocardial cus…	NA	up
ENSG00000118503	TNFAIP3	0.757909	2.876e-268	1.24916e-263	0.801	0.522	TNF alpha induced protein 3 [Source:HGNC Symbol;Acc:HGNC:11896]	GO:0001922(B-1 B cell homeostasis);GO:0002020(protease binding);GO:0002237(response to molecule of bacterial origin);GO:0002634(regulation of germinal center formation);GO:0002677(negative regulation of chronic inflammatory response);GO:0003677(DNA binding);GO:0003824(catalytic activity);GO:0004842(ubiquitin-protein transferase activity);GO:0004843(thiol-dependent ubiquitin-specific protease acti…	04064(NF-kappa B signaling pathway);04217(Necroptosis);04621(NOD-like receptor signaling pathway);04657(IL-17 signaling pathway);04668(TNF signaling pathway);05162(Measles);05169(Epstein-Barr virus infection)	up
ENSG00000100300	TSPO	0.768821	4.67942e-268	2.03246e-263	0.829	0.673	translocator protein [Source:HGNC Symbol;Acc:HGNC:1158]	GO:0005497(androgen binding);GO:0005515(protein binding);GO:0005739(mitochondrion);GO:0005741(mitochondrial outer membrane);GO:0005783(endoplasmic reticulum);GO:0006626(protein targeting to mitochondrion);GO:0006694(steroid biosynthetic process);GO:0006700(C21-steroid hormone biosynthetic process);GO:0006783(heme biosynthetic process);GO:0006811(ion transport);GO:0006820(anion transport);GO:00068…	04080(Neuroactive ligand-receptor interaction);04979(Cholesterol metabolism);05166(Human T-cell leukemia virus 1 infection)	up
ENSG00000107551	RASSF4	-0.883667	3.65941e-266	1.58943e-261	0.228	0.516	Ras association domain family member 4 [Source:HGNC Symbol;Acc:HGNC:20793]	GO:0005515(protein binding);GO:0007049(cell cycle);GO:0007165(signal transduction)	04392(Hippo signaling pathway - multiple species)	down
ENSG00000087116	ADAMTS2	-0.691418	4.83166e-266	2.09859e-261	0.047	0.265	ADAM metallopeptidase with thrombospondin type 1 motif 2 [Source:HGNC Symbol;Acc:HGNC:218]	GO:0004222(metalloendopeptidase activity);GO:0005576(extracellular region);GO:0006508(proteolysis);GO:0007283(spermatogenesis);GO:0008233(peptidase activity);GO:0008237(metallopeptidase activity);GO:0008270(zinc ion binding);GO:0016485(protein processing);GO:0016787(hydrolase activity);GO:0030199(collagen fibril organization);GO:0030324(lung development);GO:0030574(collagen catabolic process);GO:…	NA	down
ENSG00000075420	FNDC3B	0.992822	6.20714e-266	2.69601e-261	0.539	0.257	fibronectin type III domain containing 3B [Source:HGNC Symbol;Acc:HGNC:24670]	GO:0003723(RNA binding);GO:0005515(protein binding);GO:0016020(membrane);GO:0016021(integral component of membrane)	NA	up
ENSG00000065809	FAM107B	1.00458	7.70377e-266	3.34605e-261	0.557	0.268	family with sequence similarity 107 member B [Source:HGNC Symbol;Acc:HGNC:23726]	NA	NA	up
ENSG00000143878	RHOB	-0.943381	1.38576e-264	6.0189e-260	0.494	0.734	ras homolog family member B [Source:HGNC Symbol;Acc:HGNC:668]	GO:0000166(nucleotide binding);GO:0000281(mitotic cytokinesis);GO:0001525(angiogenesis);GO:0003924(GTPase activity);GO:0005515(protein binding);GO:0005525(GTP binding);GO:0005622(intracellular);GO:0005634(nucleus);GO:0005737(cytoplasm);GO:0005768(endosome);GO:0005769(early endosome);GO:0005770(late endosome);GO:0005829(cytosol);GO:0005886(plasma membrane);GO:0005925(focal adhesion);GO:0005938(cel…	NA	down
ENSG00000196154	S100A4	0.79247	1.51779e-264	6.59237e-260	0.942	0.863	S100 calcium binding protein A4 [Source:HGNC Symbol;Acc:HGNC:10494]	GO:0001837(epithelial to mesenchymal transition);GO:0003723(RNA binding);GO:0003779(actin binding);GO:0005509(calcium ion binding);GO:0005515(protein binding);GO:0005576(extracellular region);GO:0005615(extracellular space);GO:0005634(nucleus);GO:0042802(identical protein binding);GO:0043005(neuron projection);GO:0043123(positive regulation of I-kappaB kinase/NF-kappaB signaling);GO:0046872(metal…	NA	up
ENSG00000166920	C15orf48	1.33698	2.97965e-263	1.29418e-258	0.327	0.065	chromosome 15 open reading frame 48 [Source:HGNC Symbol;Acc:HGNC:29898]	GO:0004129(cytochrome-c oxidase activity);GO:0005515(protein binding);GO:0005634(nucleus);GO:0005751(mitochondrial respiratory chain complex IV);GO:0009617(response to bacterium);GO:0016020(membrane);GO:0016021(integral component of membrane);GO:0022900(electron transport chain);GO:1902600(proton transmembrane transport)	NA	up
ENSG00000117154	IGSF21	-0.48604	1.74711e-261	7.58841e-257	0.004	0.139	immunoglobin superfamily member 21 [Source:HGNC Symbol;Acc:HGNC:28246]	GO:0005886(plasma membrane);GO:0005913(cell-cell adherens junction);GO:0007156(homophilic cell adhesion via plasma membrane adhesion molecules);GO:0007157(heterophilic cell-cell adhesion via plasma membrane cell adhesion molecules);GO:0016020(membrane);GO:0030054(cell junction);GO:0031225(anchored component of membrane);GO:0031362(anchored component of external side of plasma membrane);GO:0038023…	NA	down
ENSG00000132386	SERPINF1	-0.669297	2.36045e-259	1.02524e-254	0.048	0.263	serpin family F member 1 [Source:HGNC Symbol;Acc:HGNC:8824]	GO:0001822(kidney development);GO:0004867(serine-type endopeptidase inhibitor activity);GO:0005515(protein binding);GO:0005576(extracellular region);GO:0005604(basement membrane);GO:0005615(extracellular space);GO:0007275(multicellular organism development);GO:0007568(aging);GO:0007614(short-term memory);GO:0008283(cell population proliferation);GO:0010447(response to acidic pH);GO:0010596(negati…	04310(Wnt signaling pathway)	down
ENSG00000240409	MTATP8P1	-0.595895	7.13421e-259	3.09867e-254	0.025	0.209	MT-ATP8 pseudogene 1 [Source:HGNC Symbol;Acc:HGNC:44571]	NA	NA	down
ENSG00000148180	GSN	-0.797512	8.29826e-259	3.60427e-254	0.459	0.742	gelsolin [Source:HGNC Symbol;Acc:HGNC:4620]	GO:0001726(ruffle);GO:0002102(podosome);GO:0003779(actin binding);GO:0005509(calcium ion binding);GO:0005515(protein binding);GO:0005576(extracellular region);GO:0005615(extracellular space);GO:0005634(nucleus);GO:0005737(cytoplasm);GO:0005829(cytosol);GO:0005856(cytoskeleton);GO:0005886(plasma membrane);GO:0005925(focal adhesion);GO:0006911(phagocytosis, engulfment);GO:0006915(apoptotic process)…	04666(Fc gamma R-mediated phagocytosis);04810(Regulation of actin cytoskeleton);05203(Viral carcinogenesis)	down
ENSG00000137312	FLOT1	0.916485	3.19513e-258	1.38777e-253	0.509	0.211	flotillin 1 [Source:HGNC Symbol;Acc:HGNC:3757]	GO:0001765(membrane raft assembly);GO:0001819(positive regulation of cytokine production);GO:0001931(uropod);GO:0001934(positive regulation of protein phosphorylation);GO:0002020(protease binding);GO:0002090(regulation of receptor internalization);GO:0005515(protein binding);GO:0005765(lysosomal membrane);GO:0005768(endosome);GO:0005769(early endosome);GO:0005815(microtubule organizing center);GO…	04910(Insulin signaling pathway)	up
ENSG00000090659	CD209	-0.725058	7.50467e-258	3.25958e-253	0.022	0.199	CD209 molecule [Source:HGNC Symbol;Acc:HGNC:1641]	GO:0001618(virus receptor activity);GO:0002223(stimulatory C-type lectin receptor signaling pathway);GO:0002250(adaptive immune response);GO:0002376(immune system process);GO:0005515(protein binding);GO:0005537(mannose binding);GO:0005576(extracellular region);GO:0005737(cytoplasm);GO:0005886(plasma membrane);GO:0006897(endocytosis);GO:0007155(cell adhesion);GO:0007157(heterophilic cell-cell adhe…	04145(Phagosome);04625(C-type lectin receptor signaling pathway);05152(Tuberculosis);05162(Measles)	down
ENSG00000091436	MAP3K20	0.979259	1.41179e-257	6.13196e-253	0.395	0.122	mitogen-activated protein kinase kinase kinase 20 [Source:HGNC Symbol;Acc:HGNC:17797]	GO:0000077(DNA damage checkpoint);GO:0000165(MAPK cascade);GO:0000166(nucleotide binding);GO:0000186(activation of MAPKK activity);GO:0000287(magnesium ion binding);GO:0003723(RNA binding);GO:0004672(protein kinase activity);GO:0004674(protein serine/threonine kinase activity);GO:0004709(MAP kinase kinase kinase activity);GO:0005515(protein binding);GO:0005524(ATP binding);GO:0005634(nucleus);GO:…	04010(MAPK signaling pathway)	up
ENSG00000101745	ANKRD12	-0.841034	3.73064e-255	1.62037e-250	0.469	0.715	ankyrin repeat domain 12 [Source:HGNC Symbol;Acc:HGNC:29135]	GO:0005515(protein binding);GO:0005634(nucleus);GO:0005654(nucleoplasm);GO:0005829(cytosol)	NA	down
ENSG00000196126	HLA-DRB1	-0.879989	4.03069e-255	1.75069e-250	0.494	0.752	major histocompatibility complex, class II, DR beta 1 [Source:HGNC Symbol;Acc:HGNC:4948]	GO:0000139(Golgi membrane);GO:0001618(virus receptor activity);GO:0002376(immune system process);GO:0002381(immunoglobulin production involved in immunoglobulin mediated immune response);GO:0002437(inflammatory response to antigenic stimulus);GO:0002455(humoral immune response mediated by circulating immunoglobulin);GO:0002504(antigen processing and presentation of peptide or polysaccharide antig…	04145(Phagosome);04514(Cell adhesion molecules (CAMs));04612(Antigen processing and presentation);04640(Hematopoietic cell lineage);04658(Th1 and Th2 cell differentiation);04659(Th17 cell differentiation);04672(Intestinal immune network for IgA production);04940(Type I diabetes mellitus);05140(Leishmaniasis);05145(Toxoplasmosis);05150(Staphylococcus aureus infection);05152(Tuberculosis);05164(Inf…	down
ENSG00000011465	DCN	-0.743645	7.4436e-255	3.23305e-250	0.113	0.378	decorin [Source:HGNC Symbol;Acc:HGNC:2705]	GO:0001822(kidney development);GO:0001890(placenta development);GO:0003723(RNA binding);GO:0005515(protein binding);GO:0005518(collagen binding);GO:0005539(glycosaminoglycan binding);GO:0005576(extracellular region);GO:0005589(collagen type VI trimer);GO:0005615(extracellular space);GO:0005796(Golgi lumen);GO:0007519(skeletal muscle tissue development);GO:0007568(aging);GO:0009612(response to mec…	04350(TGF-beta signaling pathway);05205(Proteoglycans in cancer)	down
ENSG00000085117	CD82	0.909121	1.38238e-254	6.00421e-250	0.372	0.096	CD82 molecule [Source:HGNC Symbol;Acc:HGNC:6210]	GO:0005515(protein binding);GO:0005886(plasma membrane);GO:0005887(integral component of plasma membrane);GO:0007166(cell surface receptor signaling pathway);GO:0016020(membrane);GO:0016021(integral component of membrane);GO:0070062(extracellular exosome)	04115(p53 signaling pathway)	up
ENSG00000137331	IER3	0.906035	4.86814e-254	2.11443e-249	0.894	0.742	immediate early response 3 [Source:HGNC Symbol;Acc:HGNC:5392]	GO:0005515(protein binding);GO:0005634(nucleus);GO:0005829(cytosol);GO:0006915(apoptotic process);GO:0009653(anatomical structure morphogenesis);GO:0014066(regulation of phosphatidylinositol 3-kinase signaling);GO:0016020(membrane);GO:0016021(integral component of membrane);GO:0043066(negative regulation of apoptotic process);GO:2001020(regulation of response to DNA damage stimulus)	NA	up
ENSG00000271614	ATP2B1-AS1	1.06663	2.25141e-253	9.77878e-249	0.546	0.278	ATP2B1 antisense RNA 1 [Source:HGNC Symbol;Acc:HGNC:27883]	NA	NA	up
ENSG00000115594	IL1R1	0.912439	2.97737e-253	1.29319e-248	0.285	0.042	interleukin 1 receptor type 1 [Source:HGNC Symbol;Acc:HGNC:5993]	GO:0002020(protease binding);GO:0004888(transmembrane signaling receptor activity);GO:0004908(interleukin-1 receptor activity);GO:0004909(interleukin-1, type I, activating receptor activity);GO:0005161(platelet-derived growth factor receptor binding);GO:0005515(protein binding);GO:0005576(extracellular region);GO:0005886(plasma membrane);GO:0005887(integral component of plasma membrane);GO:000695…	04010(MAPK signaling pathway);04060(Cytokine-cytokine receptor interaction);04064(NF-kappa B signaling pathway);04380(Osteoclast differentiation);04640(Hematopoietic cell lineage);04659(Th17 cell differentiation);04750(Inflammatory mediator regulation of TRP channels);05146(Amoebiasis);05163(Human cytomegalovirus infection);05166(Human T-cell leukemia virus 1 infection);05418(Fluid shear stress a…	up
ENSG00000163734	CXCL3	1.29135	3.24368e-253	1.40886e-248	0.637	0.344	C-X-C motif chemokine ligand 3 [Source:HGNC Symbol;Acc:HGNC:4604]	GO:0005125(cytokine activity);GO:0005576(extracellular region);GO:0005615(extracellular space);GO:0006935(chemotaxis);GO:0006952(defense response);GO:0006954(inflammatory response);GO:0006955(immune response);GO:0007186(G protein-coupled receptor signaling pathway);GO:0008009(chemokine activity);GO:0010469(regulation of signaling receptor activity);GO:0030593(neutrophil chemotaxis);GO:0030595(leu…	04060(Cytokine-cytokine receptor interaction);04062(Chemokine signaling pathway);04621(NOD-like receptor signaling pathway);04657(IL-17 signaling pathway);04668(TNF signaling pathway);05132(Salmonella infection);05134(Legionellosis);05167(Kaposi sarcoma-associated herpesvirus infection)	up
ENSG00000275395	FCGBP	-1.02692	1.02175e-252	4.43789e-248	0.044	0.251	Fc fragment of IgG binding protein [Source:HGNC Symbol;Acc:HGNC:13572]	GO:0005515(protein binding)	NA	down
ENSG00000101096	NFATC2	-0.495785	2.15898e-252	9.37731e-248	0.013	0.171	nuclear factor of activated T cells 2 [Source:HGNC Symbol;Acc:HGNC:7776]	GO:0000122(negative regulation of transcription by RNA polymerase II);GO:0000790(nuclear chromatin);GO:0000976(transcription regulatory region sequence-specific DNA binding);GO:0000978(RNA polymerase II proximal promoter sequence-specific DNA binding);GO:0000981(DNA-binding transcription factor activity, RNA polymerase II-specific);GO:0001227(DNA-binding transcription repressor activity, RNA poly…	04022(cGMP-PKG signaling pathway);04218(Cellular senescence);04310(Wnt signaling pathway);04360(Axon guidance);04370(VEGF signaling pathway);04380(Osteoclast differentiation);04625(C-type lectin receptor signaling pathway);04650(Natural killer cell mediated cytotoxicity);04658(Th1 and Th2 cell differentiation);04659(Th17 cell differentiation);04660(T cell receptor signaling pathway);04662(B cell …	down
ENSG00000140678	ITGAX	0.941958	4.00141e-251	1.73797e-246	0.447	0.151	integrin subunit alpha X [Source:HGNC Symbol;Acc:HGNC:6152]	GO:0005515(protein binding);GO:0005886(plasma membrane);GO:0007155(cell adhesion);GO:0007229(integrin-mediated signaling pathway);GO:0008305(integrin complex);GO:0009887(animal organ morphogenesis);GO:0009897(external side of plasma membrane);GO:0009986(cell surface);GO:0016020(membrane);GO:0016021(integral component of membrane);GO:0019221(cytokine-mediated signaling pathway);GO:0030198(extracel…	04610(Complement and coagulation cascades);04810(Regulation of actin cytoskeleton);05152(Tuberculosis)	up
ENSG00000243449	C4orf48	0.907012	6.04936e-250	2.62748e-245	0.542	0.256	chromosome 4 open reading frame 48 [Source:HGNC Symbol;Acc:HGNC:34437]	GO:0005576(extracellular region)	NA	up
ENSG00000171227	TMEM37	-0.643674	2.36902e-249	1.02896e-244	0.041	0.237	transmembrane protein 37 [Source:HGNC Symbol;Acc:HGNC:18216]	GO:0005244(voltage-gated ion channel activity);GO:0005262(calcium channel activity);GO:0006811(ion transport);GO:0006816(calcium ion transport);GO:0016020(membrane);GO:0016021(integral component of membrane);GO:0034220(ion transmembrane transport);GO:0034765(regulation of ion transmembrane transport);GO:0070588(calcium ion transmembrane transport)	NA	down
ENSG00000155792	DEPTOR	-0.453791	1.17231e-248	5.0918e-244	0.01	0.157	DEP domain containing MTOR interacting protein [Source:HGNC Symbol;Acc:HGNC:22953]	GO:0005515(protein binding);GO:0005622(intracellular);GO:0006469(negative regulation of protein kinase activity);GO:0032007(negative regulation of TOR signaling);GO:0035556(intracellular signal transduction);GO:0045792(negative regulation of cell size);GO:2001236(regulation of extrinsic apoptotic signaling pathway)	04140(Autophagy - animal);04150(mTOR signaling pathway)	down
ENSG00000204592	HLA-E	-0.634616	1.80349e-248	7.83327e-244	0.801	0.914	major histocompatibility complex, class I, E [Source:HGNC Symbol;Acc:HGNC:4962]	GO:0006955(immune response);GO:0019882(antigen processing and presentation)	04144(Endocytosis);04145(Phagosome);04218(Cellular senescence);04514(Cell adhesion molecules (CAMs));04612(Antigen processing and presentation);04650(Natural killer cell mediated cytotoxicity);04940(Type I diabetes mellitus);05163(Human cytomegalovirus infection);05165(Human papillomavirus infection);05166(Human T-cell leukemia virus 1 infection);05167(Kaposi sarcoma-associated herpesvirus infect…	down
ENSG00000081041	CXCL2	1.28513	4.58676e-247	1.99221e-242	0.674	0.404	C-X-C motif chemokine ligand 2 [Source:HGNC Symbol;Acc:HGNC:4603]	GO:0002237(response to molecule of bacterial origin);GO:0005125(cytokine activity);GO:0005515(protein binding);GO:0005576(extracellular region);GO:0005615(extracellular space);GO:0006935(chemotaxis);GO:0006952(defense response);GO:0006954(inflammatory response);GO:0006955(immune response);GO:0007186(G protein-coupled receptor signaling pathway);GO:0008009(chemokine activity);GO:0010469(regulation…	04060(Cytokine-cytokine receptor interaction);04062(Chemokine signaling pathway);04064(NF-kappa B signaling pathway);04621(NOD-like receptor signaling pathway);04657(IL-17 signaling pathway);04668(TNF signaling pathway);05132(Salmonella infection);05134(Legionellosis);05167(Kaposi sarcoma-associated herpesvirus infection)	up
ENSG00000165092	ALDH1A1	-0.760629	6.99493e-247	3.03818e-242	0.027	0.206	aldehyde dehydrogenase 1 family member A1 [Source:HGNC Symbol;Acc:HGNC:402]	GO:0000166(nucleotide binding);GO:0001523(retinoid metabolic process);GO:0001758(retinal dehydrogenase activity);GO:0004029(aldehyde dehydrogenase (NAD) activity);GO:0005096(GTPase activator activity);GO:0005497(androgen binding);GO:0005737(cytoplasm);GO:0005829(cytosol);GO:0006069(ethanol oxidation);GO:0006081(cellular aldehyde metabolic process);GO:0016491(oxidoreductase activity);GO:0016620(ox…	00830(Retinol metabolism)	down
ENSG00000211445	GPX3	-0.76212	4.0704e-246	1.76794e-241	0.075	0.305	glutathione peroxidase 3 [Source:HGNC Symbol;Acc:HGNC:4555]	GO:0004601(peroxidase activity);GO:0004602(glutathione peroxidase activity);GO:0005515(protein binding);GO:0005576(extracellular region);GO:0005615(extracellular space);GO:0006979(response to oxidative stress);GO:0006982(response to lipid hydroperoxide);GO:0008134(transcription factor binding);GO:0008430(selenium binding);GO:0016491(oxidoreductase activity);GO:0034599(cellular response to oxidati…	00480(Glutathione metabolism);00590(Arachidonic acid metabolism);04918(Thyroid hormone synthesis)	down
ENSG00000076944	STXBP2	0.998393	2.45841e-245	1.06779e-240	0.57	0.324	syntaxin binding protein 2 [Source:HGNC Symbol;Acc:HGNC:11445]	GO:0001909(leukocyte mediated cytotoxicity);GO:0002576(platelet degranulation);GO:0005515(protein binding);GO:0005576(extracellular region);GO:0005829(cytosol);GO:0005886(plasma membrane);GO:0006887(exocytosis);GO:0006904(vesicle docking involved in exocytosis);GO:0015031(protein transport);GO:0016020(membrane);GO:0016021(integral component of membrane);GO:0016192(vesicle-mediated transport);GO:0…	NA	up
ENSG00000042493	CAPG	0.930968	3.47262e-243	1.5083e-238	0.567	0.266	capping actin protein, gelsolin like [Source:HGNC Symbol;Acc:HGNC:1474]	GO:0001726(ruffle);GO:0003779(actin binding);GO:0005515(protein binding);GO:0005634(nucleus);GO:0005654(nucleoplasm);GO:0005730(nucleolus);GO:0005737(cytoplasm);GO:0005814(centriole);GO:0008290(F-actin capping protein complex);GO:0019904(protein domain specific binding);GO:0030027(lamellipodium);GO:0042470(melanosome);GO:0042995(cell projection);GO:0044877(protein-containing complex binding);GO:0…	NA	up
ENSG00000222041	CYTOR	0.883401	1.0042e-242	4.36166e-238	0.342	0.08	cytoskeleton regulator RNA [Source:HGNC Symbol;Acc:HGNC:28717]	NA	NA	up
ENSG00000151474	FRMD4A	-0.712448	1.70276e-238	7.39577e-234	0.071	0.286	FERM domain containing 4A [Source:HGNC Symbol;Acc:HGNC:25491]	GO:0005737(cytoplasm);GO:0005856(cytoskeleton);GO:0005912(adherens junction);GO:0005923(bicellular tight junction);GO:0030054(cell junction);GO:0030674(protein binding, bridging);GO:0050709(negative regulation of protein secretion);GO:0050714(positive regulation of protein secretion);GO:0090162(establishment of epithelial cell polarity)	NA	down
ENSG00000198814	GK	0.978779	2.13885e-238	9.28988e-234	0.428	0.148	glycerol kinase [Source:HGNC Symbol;Acc:HGNC:4289]	GO:0000166(nucleotide binding);GO:0004370(glycerol kinase activity);GO:0005515(protein binding);GO:0005524(ATP binding);GO:0005737(cytoplasm);GO:0005739(mitochondrion);GO:0005741(mitochondrial outer membrane);GO:0005829(cytosol);GO:0005975(carbohydrate metabolic process);GO:0006071(glycerol metabolic process);GO:0006072(glycerol-3-phosphate metabolic process);GO:0006641(triglyceride metabolic pro…	00561(Glycerolipid metabolism);03320(PPAR signaling pathway)	up
ENSG00000170345	FOS	-0.73323	4.93992e-238	2.14561e-233	0.904	0.958	Fos proto-oncogene, AP-1 transcription factor subunit [Source:HGNC Symbol;Acc:HGNC:3796]	GO:0000978(RNA polymerase II proximal promoter sequence-specific DNA binding);GO:0000979(RNA polymerase II core promoter sequence-specific DNA binding);GO:0000981(DNA-binding transcription factor activity, RNA polymerase II-specific);GO:0001102(RNA polymerase II activating transcription factor binding);GO:0001228(DNA-binding transcription activator activity, RNA polymerase II-specific);GO:0001661…	01522(Endocrine resistance);04010(MAPK signaling pathway);04024(cAMP signaling pathway);04210(Apoptosis);04380(Osteoclast differentiation);04620(Toll-like receptor signaling pathway);04657(IL-17 signaling pathway);04658(Th1 and Th2 cell differentiation);04659(Th17 cell differentiation);04660(T cell receptor signaling pathway);04662(B cell receptor signaling pathway);04668(TNF signaling pathway);0…	down
ENSG00000134460	IL2RA	-0.559139	6.00425e-237	2.60789e-232	0.007	0.138	interleukin 2 receptor subunit alpha [Source:HGNC Symbol;Acc:HGNC:6008]	GO:0000165(MAPK cascade);GO:0002376(immune system process);GO:0002437(inflammatory response to antigenic stimulus);GO:0002664(regulation of T cell tolerance induction);GO:0004911(interleukin-2 receptor activity);GO:0005515(protein binding);GO:0005886(plasma membrane);GO:0005893(interleukin-2 receptor complex);GO:0006915(apoptotic process);GO:0006924(activation-induced cell death of T cells);GO:00…	04060(Cytokine-cytokine receptor interaction);04144(Endocytosis);04151(PI3K-Akt signaling pathway);04630(Jak-STAT signaling pathway);04640(Hematopoietic cell lineage);04658(Th1 and Th2 cell differentiation);04659(Th17 cell differentiation);05162(Measles);05166(Human T-cell leukemia virus 1 infection);05200(Pathways in cancer)	down
ENSG00000134419	RPS15A	-0.638282	4.71358e-236	2.0473e-231	0.867	0.938	ribosomal protein S15a [Source:HGNC Symbol;Acc:HGNC:10389]	GO:0000184(nuclear-transcribed mRNA catabolic process, nonsense-mediated decay);GO:0003723(RNA binding);GO:0003735(structural constituent of ribosome);GO:0005515(protein binding);GO:0005654(nucleoplasm);GO:0005737(cytoplasm);GO:0005829(cytosol);GO:0005840(ribosome);GO:0006412(translation);GO:0006413(translational initiation);GO:0006614(SRP-dependent cotranslational protein targeting to membrane);…	03010(Ribosome)	down
ENSG00000130332	LSM7	0.8781	1.15008e-235	4.99525e-231	0.427	0.156	LSM7 homolog, U6 small nuclear RNA and mRNA degradation associated [Source:HGNC Symbol;Acc:HGNC:20470]	GO:0000398(mRNA splicing, via spliceosome);GO:0000956(nuclear-transcribed mRNA catabolic process);GO:0003723(RNA binding);GO:0005515(protein binding);GO:0005634(nucleus);GO:0005654(nucleoplasm);GO:0005681(spliceosomal complex);GO:0005688(U6 snRNP);GO:0005689(U12-type spliceosomal complex);GO:0005829(cytosol);GO:0006397(mRNA processing);GO:0008380(RNA splicing);GO:0017070(U6 snRNA binding);GO:0043…	03018(RNA degradation);03040(Spliceosome)	up
ENSG00000104870	FCGRT	-0.751834	1.17928e-235	5.12211e-231	0.719	0.862	Fc fragment of IgG receptor and transporter [Source:HGNC Symbol;Acc:HGNC:3621]	GO:0002416(IgG immunoglobulin transcytosis in epithelial cells mediated by FcRn immunoglobulin receptor);GO:0005615(extracellular space);GO:0005886(plasma membrane);GO:0006955(immune response);GO:0009897(external side of plasma membrane);GO:0016020(membrane);GO:0016021(integral component of membrane);GO:0019864(IgG binding);GO:0030881(beta-2-microglobulin binding)	NA	down
ENSG00000077063	CTTNBP2	-0.416047	1.24344e-235	5.40074e-231	0.002	0.118	cortactin binding protein 2 [Source:HGNC Symbol;Acc:HGNC:15679]	GO:0005515(protein binding);GO:0005737(cytoplasm);GO:0005938(cell cortex);GO:0007420(brain development);GO:0008021(synaptic vesicle);GO:0017124(SH3 domain binding);GO:0042995(cell projection);GO:0043197(dendritic spine);GO:0050807(regulation of synapse organization);GO:0098871(postsynaptic actin cytoskeleton);GO:0098978(glutamatergic synapse);GO:1905274(regulation of modification of postsynaptic …	NA	down
ENSG00000245532	NEAT1	-0.69696	1.99042e-235	8.64519e-231	0.989	0.969	nuclear paraspeckle assembly transcript 1 [Source:HGNC Symbol;Acc:HGNC:30815]	NA	NA	down
ENSG00000112414	ADGRG6	-0.381455	1.07153e-234	4.65408e-230	0.002	0.116	adhesion G protein-coupled receptor G6 [Source:HGNC Symbol;Acc:HGNC:13841]	GO:0004888(transmembrane signaling receptor activity);GO:0004930(G protein-coupled receptor activity);GO:0005518(collagen binding);GO:0005886(plasma membrane);GO:0005887(integral component of plasma membrane);GO:0007005(mitochondrion organization);GO:0007165(signal transduction);GO:0007166(cell surface receptor signaling pathway);GO:0007186(G protein-coupled receptor signaling pathway);GO:0007189…	NA	down
ENSG00000149418	ST14	0.817333	4.05604e-234	1.7617e-229	0.309	0.068	suppression of tumorigenicity 14 [Source:HGNC Symbol;Acc:HGNC:11344]	GO:0001843(neural tube closure);GO:0004252(serine-type endopeptidase activity);GO:0005515(protein binding);GO:0005576(extracellular region);GO:0005615(extracellular space);GO:0005886(plasma membrane);GO:0005887(integral component of plasma membrane);GO:0006508(proteolysis);GO:0008233(peptidase activity);GO:0008236(serine-type peptidase activity);GO:0016020(membrane);GO:0016021(integral component …	05206(MicroRNAs in cancer)	up
ENSG00000066382	MPPED2	-0.453488	6.47237e-234	2.81121e-229	0.003	0.118	metallophosphoesterase domain containing 2 [Source:HGNC Symbol;Acc:HGNC:1180]	GO:0005515(protein binding);GO:0007399(nervous system development);GO:0016787(hydrolase activity);GO:0046872(metal ion binding)	NA	down
ENSG00000141905	NFIC	-0.779574	8.64531e-234	3.755e-229	0.288	0.566	nuclear factor I C [Source:HGNC Symbol;Acc:HGNC:7786]	GO:0000122(negative regulation of transcription by RNA polymerase II);GO:0000978(RNA polymerase II proximal promoter sequence-specific DNA binding);GO:0000981(DNA-binding transcription factor activity, RNA polymerase II-specific);GO:0000987(proximal promoter sequence-specific DNA binding);GO:0001228(DNA-binding transcription activator activity, RNA polymerase II-specific);GO:0001650(fibrillar cen…	NA	down
ENSG00000163328	GPR155	-0.611064	1.92577e-233	8.36441e-229	0.037	0.225	G protein-coupled receptor 155 [Source:HGNC Symbol;Acc:HGNC:22951]	GO:0003674(molecular_function);GO:0016020(membrane);GO:0016021(integral component of membrane);GO:0035556(intracellular signal transduction);GO:0050890(cognition);GO:0055085(transmembrane transport);GO:0070062(extracellular exosome)	NA	down
ENSG00000185339	TCN2	-0.762727	2.45452e-233	1.0661e-228	0.14	0.4	transcobalamin 2 [Source:HGNC Symbol;Acc:HGNC:11653]	GO:0005515(protein binding);GO:0005576(extracellular region);GO:0005615(extracellular space);GO:0005768(endosome);GO:0006811(ion transport);GO:0006824(cobalt ion transport);GO:0009235(cobalamin metabolic process);GO:0015889(cobalamin transport);GO:0031419(cobalamin binding);GO:0043202(lysosomal lumen);GO:0046872(metal ion binding)	04977(Vitamin digestion and absorption)	down
ENSG00000196628	TCF4	-0.737983	3.12233e-232	1.35615e-227	0.115	0.366	transcription factor 4 [Source:HGNC Symbol;Acc:HGNC:11634]	GO:0000122(negative regulation of transcription by RNA polymerase II);GO:0000790(nuclear chromatin);GO:0000978(RNA polymerase II proximal promoter sequence-specific DNA binding);GO:0000981(DNA-binding transcription factor activity, RNA polymerase II-specific);GO:0001093(TFIIB-class transcription factor binding);GO:0001228(DNA-binding transcription activator activity, RNA polymerase II-specific);G…	NA	down
ENSG00000105835	NAMPT	0.89301	1.52965e-231	6.6439e-227	0.782	0.564	nicotinamide phosphoribosyltransferase [Source:HGNC Symbol;Acc:HGNC:30092]	GO:0001774(microglial cell activation);GO:0003824(catalytic activity);GO:0004514(nicotinate-nucleotide diphosphorylase (carboxylating) activity);GO:0005125(cytokine activity);GO:0005515(protein binding);GO:0005576(extracellular region);GO:0005615(extracellular space);GO:0005634(nucleus);GO:0005737(cytoplasm);GO:0005829(cytosol);GO:0005886(plasma membrane);GO:0007165(signal transduction);GO:000726…	00760(Nicotinate and nicotinamide metabolism);04621(NOD-like receptor signaling pathway)	up
ENSG00000072778	ACADVL	0.857285	9.84428e-230	4.27577e-225	0.486	0.205	acyl-CoA dehydrogenase very long chain [Source:HGNC Symbol;Acc:HGNC:92]	GO:0000062(fatty-acyl-CoA binding);GO:0001659(temperature homeostasis);GO:0003995(acyl-CoA dehydrogenase activity);GO:0004466(long-chain-acyl-CoA dehydrogenase activity);GO:0005634(nucleus);GO:0005730(nucleolus);GO:0005739(mitochondrion);GO:0005743(mitochondrial inner membrane);GO:0005759(mitochondrial matrix);GO:0005829(cytosol);GO:0006629(lipid metabolic process);GO:0006631(fatty acid metabolic…	00071(Fatty acid degradation)	up
ENSG00000167004	PDIA3	0.837575	1.45358e-229	6.3135e-225	0.665	0.462	protein disulfide isomerase family A member 3 [Source:HGNC Symbol;Acc:HGNC:4606]	GO:0002474(antigen processing and presentation of peptide antigen via MHC class I);GO:0002479(antigen processing and presentation of exogenous peptide antigen via MHC class I, TAP-dependent);GO:0003723(RNA binding);GO:0003756(protein disulfide isomerase activity);GO:0004197(cysteine-type endopeptidase activity);GO:0004629(phospholipase C activity);GO:0005515(protein binding);GO:0005615(extracellu…	04141(Protein processing in endoplasmic reticulum);04612(Antigen processing and presentation);05163(Human cytomegalovirus infection);05168(Herpes simplex virus 1 infection);05169(Epstein-Barr virus infection);05170(Human immunodeficiency virus 1 infection)	up
ENSG00000198258	UBL5	0.746909	1.65317e-229	7.18036e-225	0.728	0.522	ubiquitin like 5 [Source:HGNC Symbol;Acc:HGNC:13736]	GO:0000398(mRNA splicing, via spliceosome);GO:0005515(protein binding);GO:0005634(nucleus);GO:0005737(cytoplasm);GO:0006464(cellular protein modification process);GO:0031386(protein tag);GO:1903955(positive regulation of protein targeting to mitochondrion)	NA	up
ENSG00000145416	MARCH1	-0.781867	5.79805e-229	2.51833e-224	0.243	0.53	membrane associated ring-CH-type finger 1 [Source:HGNC Symbol;Acc:HGNC:26077]	GO:0000209(protein polyubiquitination);GO:0002376(immune system process);GO:0002495(antigen processing and presentation of peptide antigen via MHC class II);GO:0004842(ubiquitin-protein transferase activity);GO:0005764(lysosome);GO:0005765(lysosomal membrane);GO:0005768(endosome);GO:0005789(endoplasmic reticulum membrane);GO:0005794(Golgi apparatus);GO:0005886(plasma membrane);GO:0006955(immune r…	NA	down
ENSG00000122406	RPL5	-0.60857	8.18493e-229	3.55504e-224	0.823	0.916	ribosomal protein L5 [Source:HGNC Symbol;Acc:HGNC:10360]	GO:0000027(ribosomal large subunit assembly);GO:0000184(nuclear-transcribed mRNA catabolic process, nonsense-mediated decay);GO:0003723(RNA binding);GO:0003730(mRNA 3'-UTR binding);GO:0003735(structural constituent of ribosome);GO:0005515(protein binding);GO:0005622(intracellular);GO:0005634(nucleus);GO:0005654(nucleoplasm);GO:0005730(nucleolus);GO:0005737(cytoplasm);GO:0005783(endoplasmic reticu…	03010(Ribosome)	down
ENSG00000136160	EDNRB	0.784423	3.50355e-228	1.52173e-223	0.244	0.03	endothelin receptor type B [Source:HGNC Symbol;Acc:HGNC:3180]	GO:0000122(negative regulation of transcription by RNA polymerase II);GO:0001755(neural crest cell migration);GO:0001934(positive regulation of protein phosphorylation);GO:0004930(G protein-coupled receptor activity);GO:0004962(endothelin receptor activity);GO:0005515(protein binding);GO:0005886(plasma membrane);GO:0005887(integral component of plasma membrane);GO:0006885(regulation of pH);GO:000…	04020(Calcium signaling pathway);04022(cGMP-PKG signaling pathway);04080(Neuroactive ligand-receptor interaction);04916(Melanogenesis);04926(Relaxin signaling pathway);05200(Pathways in cancer)	up
ENSG00000105711	SCN1B	-0.610097	2.50769e-227	1.08919e-222	0.038	0.224	sodium voltage-gated channel beta subunit 1 [Source:HGNC Symbol;Acc:HGNC:10586]	GO:0001518(voltage-gated sodium channel complex);GO:0002028(regulation of sodium ion transport);GO:0005244(voltage-gated ion channel activity);GO:0005248(voltage-gated sodium channel activity);GO:0005272(sodium channel activity);GO:0005515(protein binding);GO:0005576(extracellular region);GO:0005886(plasma membrane);GO:0005887(integral component of plasma membrane);GO:0006811(ion transport);GO:00…	04261(Adrenergic signaling in cardiomyocytes)	down
ENSG00000149591	TAGLN	-0.975246	5.12135e-227	2.22441e-222	0.162	0.374	transgelin [Source:HGNC Symbol;Acc:HGNC:11553]	GO:0003779(actin binding);GO:0005515(protein binding);GO:0005737(cytoplasm);GO:0007517(muscle organ development);GO:0030855(epithelial cell differentiation);GO:0051015(actin filament binding)	NA	down
ENSG00000180879	SSR4	0.768064	1.16383e-226	5.055e-222	0.695	0.508	signal sequence receptor subunit 4 [Source:HGNC Symbol;Acc:HGNC:11326]	GO:0005783(endoplasmic reticulum);GO:0005784(Sec61 translocon complex);GO:0005789(endoplasmic reticulum membrane);GO:0016020(membrane);GO:0016021(integral component of membrane);GO:0070062(extracellular exosome)	04141(Protein processing in endoplasmic reticulum)	up
ENSG00000171657	GPR82	-0.458774	3.39725e-226	1.47556e-221	0.009	0.141	G protein-coupled receptor 82 [Source:HGNC Symbol;Acc:HGNC:4533]	GO:0004930(G protein-coupled receptor activity);GO:0005886(plasma membrane);GO:0007165(signal transduction);GO:0007186(G protein-coupled receptor signaling pathway);GO:0016020(membrane);GO:0016021(integral component of membrane)	NA	down
ENSG00000198585	NUDT16	-0.726647	4.91129e-226	2.13317e-221	0.155	0.414	nudix hydrolase 16 [Source:HGNC Symbol;Acc:HGNC:26442]	GO:0000166(nucleotide binding);GO:0000287(magnesium ion binding);GO:0003723(RNA binding);GO:0003729(mRNA binding);GO:0005525(GTP binding);GO:0005634(nucleus);GO:0005654(nucleoplasm);GO:0005730(nucleolus);GO:0005737(cytoplasm);GO:0006382(adenosine to inosine editing);GO:0006402(mRNA catabolic process);GO:0006508(proteolysis);GO:0008235(metalloexopeptidase activity);GO:0008284(positive regulation o…	00230(Purine metabolism);03018(RNA degradation)	down
ENSG00000135046	ANXA1	0.692186	5.91892e-226	2.57083e-221	0.868	0.756	annexin A1 [Source:HGNC Symbol;Acc:HGNC:533]	GO:0001533(cornified envelope);GO:0001780(neutrophil homeostasis);GO:0001891(phagocytic cup);GO:0002250(adaptive immune response);GO:0002376(immune system process);GO:0002548(monocyte chemotaxis);GO:0002685(regulation of leukocyte migration);GO:0003697(single-stranded DNA binding);GO:0003727(single-stranded RNA binding);GO:0004859(phospholipase inhibitor activity);GO:0005102(signaling receptor bi…	NA	up
ENSG00000136286	MYO1G	0.856649	1.44272e-224	6.2663e-220	0.359	0.103	myosin IG [Source:HGNC Symbol;Acc:HGNC:13880]	GO:0000166(nucleotide binding);GO:0001891(phagocytic cup);GO:0002250(adaptive immune response);GO:0002376(immune system process);GO:0002456(T cell mediated immunity);GO:0003774(motor activity);GO:0003779(actin binding);GO:0005516(calmodulin binding);GO:0005524(ATP binding);GO:0005546(phosphatidylinositol-4,5-bisphosphate binding);GO:0005547(phosphatidylinositol-3,4,5-trisphosphate binding);GO:000…	NA	up
ENSG00000258860	AL133163.2	0.7638	6.44058e-224	2.7974e-219	0.195	0.009	novel transcript	NA	NA	up
ENSG00000126264	HCST	0.852963	3.17778e-223	1.38024e-218	0.703	0.48	hematopoietic cell signal transducer [Source:HGNC Symbol;Acc:HGNC:16977]	GO:0005102(signaling receptor binding);GO:0005515(protein binding);GO:0005886(plasma membrane);GO:0006468(protein phosphorylation);GO:0009986(cell surface);GO:0014068(positive regulation of phosphatidylinositol 3-kinase signaling);GO:0016020(membrane);GO:0016021(integral component of membrane);GO:0043548(phosphatidylinositol 3-kinase binding);GO:0050776(regulation of immune response)	04650(Natural killer cell mediated cytotoxicity)	up
ENSG00000197632	SERPINB2	1.24237	4.80492e-223	2.08697e-218	0.179	0.004	serpin family B member 2 [Source:HGNC Symbol;Acc:HGNC:8584]	GO:0004867(serine-type endopeptidase inhibitor activity);GO:0005576(extracellular region);GO:0005615(extracellular space);GO:0005737(cytoplasm);GO:0005886(plasma membrane);GO:0010466(negative regulation of peptidase activity);GO:0010951(negative regulation of endopeptidase activity);GO:0030414(peptidase inhibitor activity);GO:0035722(interleukin-12-mediated signaling pathway);GO:0042060(wound hea…	04610(Complement and coagulation cascades)	up
ENSG00000004799	PDK4	-1.10769	5.22636e-223	2.27002e-218	0.339	0.542	pyruvate dehydrogenase kinase 4 [Source:HGNC Symbol;Acc:HGNC:8812]	GO:0000166(nucleotide binding);GO:0004672(protein kinase activity);GO:0004740(pyruvate dehydrogenase (acetyl-transferring) kinase activity);GO:0005524(ATP binding);GO:0005739(mitochondrion);GO:0005759(mitochondrial matrix);GO:0005975(carbohydrate metabolic process);GO:0006006(glucose metabolic process);GO:0006468(protein phosphorylation);GO:0006885(regulation of pH);GO:0008286(insulin receptor si…	NA	down
ENSG00000146409	SLC18B1	-0.524625	1.41905e-222	6.16349e-218	0.023	0.186	solute carrier family 18 member B1 [Source:HGNC Symbol;Acc:HGNC:21573]	GO:0005215(transporter activity);GO:0016020(membrane);GO:0016021(integral component of membrane);GO:0055085(transmembrane transport)	NA	down
ENSG00000197958	RPL12	-0.584502	4.9095e-221	2.13239e-216	0.938	0.97	ribosomal protein L12 [Source:HGNC Symbol;Acc:HGNC:10302]	GO:0000027(ribosomal large subunit assembly);GO:0000184(nuclear-transcribed mRNA catabolic process, nonsense-mediated decay);GO:0003723(RNA binding);GO:0003735(structural constituent of ribosome);GO:0005515(protein binding);GO:0005634(nucleus);GO:0005730(nucleolus);GO:0005737(cytoplasm);GO:0005829(cytosol);GO:0005840(ribosome);GO:0005925(focal adhesion);GO:0006412(translation);GO:0006413(translat…	03010(Ribosome)	down
ENSG00000177606	JUN	-0.667442	1.25658e-220	5.45782e-216	0.788	0.939	Jun proto-oncogene, AP-1 transcription factor subunit [Source:HGNC Symbol;Acc:HGNC:6204]	GO:0000122(negative regulation of transcription by RNA polymerase II);GO:0000228(nuclear chromosome);GO:0000790(nuclear chromatin);GO:0000978(RNA polymerase II proximal promoter sequence-specific DNA binding);GO:0000980(RNA polymerase II distal enhancer sequence-specific DNA binding);GO:0000981(DNA-binding transcription factor activity, RNA polymerase II-specific);GO:0001102(RNA polymerase II act…	01522(Endocrine resistance);04010(MAPK signaling pathway);04012(ErbB signaling pathway);04024(cAMP signaling pathway);04137(Mitophagy - animal);04210(Apoptosis);04310(Wnt signaling pathway);04380(Osteoclast differentiation);04510(Focal adhesion);04530(Tight junction);04620(Toll-like receptor signaling pathway);04621(NOD-like receptor signaling pathway);04625(C-type lectin receptor signaling pathw…	down
ENSG00000145592	RPL37	-0.536527	9.11213e-220	3.95776e-215	0.942	0.969	ribosomal protein L37 [Source:HGNC Symbol;Acc:HGNC:10347]	GO:0000184(nuclear-transcribed mRNA catabolic process, nonsense-mediated decay);GO:0003723(RNA binding);GO:0003735(structural constituent of ribosome);GO:0005622(intracellular);GO:0005829(cytosol);GO:0005840(ribosome);GO:0006412(translation);GO:0006413(translational initiation);GO:0006614(SRP-dependent cotranslational protein targeting to membrane);GO:0019083(viral transcription);GO:0019843(rRNA …	03010(Ribosome)	down
ENSG00000183019	MCEMP1	0.880612	2.29695e-219	9.97656e-215	0.223	0.022	mast cell expressed membrane protein 1 [Source:HGNC Symbol;Acc:HGNC:27291]	GO:0005886(plasma membrane);GO:0016020(membrane);GO:0016021(integral component of membrane);GO:0035579(specific granule membrane);GO:0043312(neutrophil degranulation);GO:0070821(tertiary granule membrane)	NA	up
ENSG00000115091	ACTR3	0.729142	9.14818e-219	3.97342e-214	0.702	0.511	ARP3 actin related protein 3 homolog [Source:HGNC Symbol;Acc:HGNC:170]	GO:0000166(nucleotide binding);GO:0003779(actin binding);GO:0005200(structural constituent of cytoskeleton);GO:0005515(protein binding);GO:0005524(ATP binding);GO:0005634(nucleus);GO:0005737(cytoplasm);GO:0005829(cytosol);GO:0005856(cytoskeleton);GO:0005885(Arp2/3 protein complex);GO:0005903(brush border);GO:0005911(cell-cell junction);GO:0005925(focal adhesion);GO:0007015(actin filament organiza…	04530(Tight junction)	up
ENSG00000086061	DNAJA1	-0.723899	2.85556e-218	1.24028e-213	0.609	0.807	DnaJ heat shock protein family (Hsp40) member A1 [Source:HGNC Symbol;Acc:HGNC:5229]	GO:0000151(ubiquitin ligase complex);GO:0001664(G protein-coupled receptor binding);GO:0001671(ATPase activator activity);GO:0005515(protein binding);GO:0005524(ATP binding);GO:0005634(nucleus);GO:0005737(cytoplasm);GO:0005739(mitochondrion);GO:0005783(endoplasmic reticulum);GO:0005829(cytosol);GO:0006457(protein folding);GO:0006986(response to unfolded protein);GO:0009408(response to heat);GO:00…	04141(Protein processing in endoplasmic reticulum)	down
ENSG00000153071	DAB2	-0.860137	3.74293e-218	1.62571e-213	0.48	0.686	DAB2, clathrin adaptor protein [Source:HGNC Symbol;Acc:HGNC:2662]	GO:0001650(fibrillar center);GO:0001934(positive regulation of protein phosphorylation);GO:0005515(protein binding);GO:0005737(cytoplasm);GO:0005765(lysosomal membrane);GO:0005829(cytosol);GO:0005886(plasma membrane);GO:0005905(clathrin-coated pit);GO:0005925(focal adhesion);GO:0006897(endocytosis);GO:0006898(receptor-mediated endocytosis);GO:0006915(apoptotic process);GO:0007275(multicellular or…	04144(Endocytosis)	down
ENSG00000167553	TUBA1C	0.866698	4.9318e-218	2.14208e-213	0.575	0.342	tubulin alpha 1c [Source:HGNC Symbol;Acc:HGNC:20768]	GO:0000166(nucleotide binding);GO:0000226(microtubule cytoskeleton organization);GO:0000278(mitotic cell cycle);GO:0003924(GTPase activity);GO:0005198(structural molecule activity);GO:0005200(structural constituent of cytoskeleton);GO:0005515(protein binding);GO:0005525(GTP binding);GO:0005634(nucleus);GO:0005737(cytoplasm);GO:0005856(cytoskeleton);GO:0005874(microtubule);GO:0005881(cytoplasmic m…	04145(Phagosome);04210(Apoptosis);04530(Tight junction);04540(Gap junction);05130(Pathogenic Escherichia coli infection)	up
ENSG00000224397	SMIM25	0.894292	1.16139e-217	5.04439e-213	0.422	0.151	small integral membrane protein 25 [Source:HGNC Symbol;Acc:HGNC:50328]	NA	NA	up
ENSG00000084070	SMAP2	-0.701748	8.08563e-217	3.51191e-212	0.485	0.728	small ArfGAP2 [Source:HGNC Symbol;Acc:HGNC:25082]	GO:0005096(GTPase activator activity);GO:0005515(protein binding);GO:0005737(cytoplasm);GO:0043547(positive regulation of GTPase activity);GO:0046872(metal ion binding)	04144(Endocytosis)	down
ENSG00000184009	ACTG1	0.603243	6.31324e-216	2.74209e-211	0.927	0.899	actin gamma 1 [Source:HGNC Symbol;Acc:HGNC:144]	GO:0000166(nucleotide binding);GO:0001895(retina homeostasis);GO:0005200(structural constituent of cytoskeleton);GO:0005515(protein binding);GO:0005522(profilin binding);GO:0005524(ATP binding);GO:0005615(extracellular space);GO:0005634(nucleus);GO:0005737(cytoplasm);GO:0005829(cytosol);GO:0005856(cytoskeleton);GO:0005884(actin filament);GO:0005886(plasma membrane);GO:0005925(focal adhesion);GO:0…	04015(Rap1 signaling pathway);04145(Phagosome);04210(Apoptosis);04390(Hippo signaling pathway);04510(Focal adhesion);04520(Adherens junction);04530(Tight junction);04611(Platelet activation);04670(Leukocyte transendothelial migration);04714(Thermogenesis);04810(Regulation of actin cytoskeleton);04919(Thyroid hormone signaling pathway);04921(Oxytocin signaling pathway);05100(Bacterial invasion of …	up
ENSG00000072694	FCGR2B	-0.764203	8.02211e-215	3.48432e-210	0.076	0.294	Fc fragment of IgG receptor IIb [Source:HGNC Symbol;Acc:HGNC:3618]	GO:0001540(amyloid-beta binding);GO:0001811(negative regulation of type I hypersensitivity);GO:0001814(negative regulation of antibody-dependent cellular cytotoxicity);GO:0002266(follicular dendritic cell activation);GO:0002313(mature B cell differentiation involved in immune response);GO:0002316(follicular B cell differentiation);GO:0002436(immune complex clearance by monocytes and macrophages);…	04145(Phagosome);04380(Osteoclast differentiation);04662(B cell receptor signaling pathway);04666(Fc gamma R-mediated phagocytosis);05150(Staphylococcus aureus infection);05152(Tuberculosis);05162(Measles)	down
ENSG00000162599	NFIA	-0.627534	1.26443e-214	5.49191e-210	0.05	0.241	nuclear factor I A [Source:HGNC Symbol;Acc:HGNC:7784]	GO:0000122(negative regulation of transcription by RNA polymerase II);GO:0000978(RNA polymerase II proximal promoter sequence-specific DNA binding);GO:0000981(DNA-binding transcription factor activity, RNA polymerase II-specific);GO:0001228(DNA-binding transcription activator activity, RNA polymerase II-specific);GO:0003677(DNA binding);GO:0003682(chromatin binding);GO:0003700(DNA-binding transcr…	NA	down
ENSG00000132514	CLEC10A	-0.698233	1.53534e-214	6.6686e-210	0.05	0.244	C-type lectin domain containing 10A [Source:HGNC Symbol;Acc:HGNC:16916]	GO:0002223(stimulatory C-type lectin receptor signaling pathway);GO:0002250(adaptive immune response);GO:0002376(immune system process);GO:0005886(plasma membrane);GO:0006897(endocytosis);GO:0016020(membrane);GO:0016021(integral component of membrane);GO:0030246(carbohydrate binding);GO:0045087(innate immune response)	NA	down
ENSG00000079215	SLC1A3	-0.742813	2.18946e-212	9.50969e-208	0.225	0.5	solute carrier family 1 member 3 [Source:HGNC Symbol;Acc:HGNC:10941]	GO:0001504(neurotransmitter uptake);GO:0005313(L-glutamate transmembrane transporter activity);GO:0005314(high-affinity glutamate transmembrane transporter activity);GO:0005886(plasma membrane);GO:0005887(integral component of plasma membrane);GO:0006536(glutamate metabolic process);GO:0006537(glutamate biosynthetic process);GO:0006811(ion transport);GO:0006865(amino acid transport);GO:0007268(ch…	04721(Synaptic vesicle cycle);04724(Glutamatergic synapse)	down
ENSG00000131724	IL13RA1	-0.746976	2.40671e-212	1.04533e-207	0.385	0.623	interleukin 13 receptor subunit alpha 1 [Source:HGNC Symbol;Acc:HGNC:5974]	GO:0004896(cytokine receptor activity);GO:0005515(protein binding);GO:0005886(plasma membrane);GO:0005898(interleukin-13 receptor complex);GO:0007166(cell surface receptor signaling pathway);GO:0009897(external side of plasma membrane);GO:0016020(membrane);GO:0016021(integral component of membrane);GO:0016515(interleukin-13 receptor activity);GO:0019221(cytokine-mediated signaling pathway);GO:001…	04060(Cytokine-cytokine receptor interaction);04630(Jak-STAT signaling pathway);05200(Pathways in cancer)	down
ENSG00000229391	HLA-DRB6	-0.754876	7.51289e-212	3.26315e-207	0.211	0.487	major histocompatibility complex, class II, DR beta 6 (pseudogene) [Source:HGNC Symbol;Acc:HGNC:4954]	NA	NA	down
ENSG00000239697	TNFSF12	-0.61812	1.62336e-210	7.05089e-206	0.085	0.301	TNF superfamily member 12 [Source:HGNC Symbol;Acc:HGNC:11927]	GO:0001525(angiogenesis);GO:0001938(positive regulation of endothelial cell proliferation);GO:0005102(signaling receptor binding);GO:0005125(cytokine activity);GO:0005164(tumor necrosis factor receptor binding);GO:0005515(protein binding);GO:0005576(extracellular region);GO:0005615(extracellular space);GO:0005886(plasma membrane);GO:0005887(integral component of plasma membrane);GO:0006915(apopto…	04060(Cytokine-cytokine receptor interaction)	down
ENSG00000282608	ADORA3	-0.545829	1.39383e-209	6.05395e-205	0.04	0.219	adenosine A3 receptor [Source:HGNC Symbol;Acc:HGNC:268]	GO:0001609(G protein-coupled adenosine receptor activity);GO:0001973(adenosine receptor signaling pathway);GO:0004930(G protein-coupled receptor activity);GO:0005886(plasma membrane);GO:0005887(integral component of plasma membrane);GO:0006954(inflammatory response);GO:0007165(signal transduction);GO:0007186(G protein-coupled receptor signaling pathway);GO:0007190(activation of adenylate cyclase …	04022(cGMP-PKG signaling pathway);04071(Sphingolipid signaling pathway);04080(Neuroactive ligand-receptor interaction)	down
ENSG00000214787	MS4A4E	-0.407598	2.08437e-209	9.05324e-205	0.006	0.126	membrane spanning 4-domains A4E [Source:HGNC Symbol;Acc:HGNC:14284]	GO:0016020(membrane);GO:0016021(integral component of membrane)	NA	down
ENSG00000132507	EIF5A	0.837754	2.80464e-209	1.21817e-204	0.529	0.305	eukaryotic translation initiation factor 5A [Source:HGNC Symbol;Acc:HGNC:3300]	GO:0003723(RNA binding);GO:0003746(translation elongation factor activity);GO:0005515(protein binding);GO:0005634(nucleus);GO:0005642(annulate lamellae);GO:0005643(nuclear pore);GO:0005737(cytoplasm);GO:0005783(endoplasmic reticulum);GO:0005789(endoplasmic reticulum membrane);GO:0005829(cytosol);GO:0006406(mRNA export from nucleus);GO:0006412(translation);GO:0006414(translational elongation);GO:0…	NA	up
ENSG00000179144	GIMAP7	-0.64726	2.46064e-208	1.06876e-203	0.075	0.284	GTPase, IMAP family member 7 [Source:HGNC Symbol;Acc:HGNC:22404]	GO:0000166(nucleotide binding);GO:0003924(GTPase activity);GO:0005515(protein binding);GO:0005525(GTP binding);GO:0005737(cytoplasm);GO:0005783(endoplasmic reticulum);GO:0005794(Golgi apparatus);GO:0005811(lipid droplet);GO:0005829(cytosol);GO:0042802(identical protein binding);GO:0042803(protein homodimerization activity);GO:0043231(intracellular membrane-bounded organelle);GO:0046039(GTP metabo…	NA	down
ENSG00000166598	HSP90B1	0.860725	4.00459e-208	1.73935e-203	0.752	0.662	heat shock protein 90 beta family member 1 [Source:HGNC Symbol;Acc:HGNC:12028]	GO:0000166(nucleotide binding);GO:0001666(response to hypoxia);GO:0002224(toll-like receptor signaling pathway);GO:0003723(RNA binding);GO:0005509(calcium ion binding);GO:0005515(protein binding);GO:0005524(ATP binding);GO:0005576(extracellular region);GO:0005634(nucleus);GO:0005783(endoplasmic reticulum);GO:0005788(endoplasmic reticulum lumen);GO:0005789(endoplasmic reticulum membrane);GO:000582…	04141(Protein processing in endoplasmic reticulum);04151(PI3K-Akt signaling pathway);04657(IL-17 signaling pathway);04915(Estrogen signaling pathway);04918(Thyroid hormone synthesis);05200(Pathways in cancer);05215(Prostate cancer);05418(Fluid shear stress and atherosclerosis)	up
ENSG00000285437	POLR2J3.1	-0.777692	8.17863e-208	3.55231e-203	0.189	0.435	RNA polymerase II subunit J3 [Source:HGNC Symbol;Acc:HGNC:33853]	GO:0001055(RNA polymerase II activity);GO:0003677(DNA binding);GO:0003899(DNA-directed 5'-3' RNA polymerase activity);GO:0005665(RNA polymerase II, core complex);GO:0006351(transcription, DNA-templated);GO:0006366(transcription by RNA polymerase II);GO:0046983(protein dimerization activity)	03020(RNA polymerase);05016(Huntington disease)	down
ENSG00000112306	RPS12	-0.519241	1.14519e-207	4.97402e-203	0.933	0.98	ribosomal protein S12 [Source:HGNC Symbol;Acc:HGNC:10385]	GO:0000184(nuclear-transcribed mRNA catabolic process, nonsense-mediated decay);GO:0003723(RNA binding);GO:0003735(structural constituent of ribosome);GO:0005622(intracellular);GO:0005654(nucleoplasm);GO:0005737(cytoplasm);GO:0005794(Golgi apparatus);GO:0005829(cytosol);GO:0005840(ribosome);GO:0006412(translation);GO:0006413(translational initiation);GO:0006614(SRP-dependent cotranslational prote…	03010(Ribosome)	down
ENSG00000167996	FTH1	0.798769	2.84747e-207	1.23677e-202	0.997	0.998	ferritin heavy chain 1 [Source:HGNC Symbol;Acc:HGNC:3976]	GO:0004322(ferroxidase activity);GO:0005506(iron ion binding);GO:0005515(protein binding);GO:0005576(extracellular region);GO:0005623(cell);GO:0005634(nucleus);GO:0005737(cytoplasm);GO:0005829(cytosol);GO:0006826(iron ion transport);GO:0006879(cellular iron ion homeostasis);GO:0006880(intracellular sequestering of iron ion);GO:0006955(immune response);GO:0008043(intracellular ferritin complex);GO…	04216(Ferroptosis);04217(Necroptosis);04978(Mineral absorption)	up
ENSG00000123342	MMP19	0.895988	5.63225e-207	2.44631e-202	0.369	0.113	matrix metallopeptidase 19 [Source:HGNC Symbol;Acc:HGNC:7165]	GO:0001525(angiogenesis);GO:0001541(ovarian follicle development);GO:0001542(ovulation from ovarian follicle);GO:0001554(luteolysis);GO:0004222(metalloendopeptidase activity);GO:0005576(extracellular region);GO:0005615(extracellular space);GO:0006508(proteolysis);GO:0007275(multicellular organism development);GO:0008233(peptidase activity);GO:0008237(metallopeptidase activity);GO:0008270(zinc ion…	NA	up
ENSG00000106565	TMEM176B	-0.884684	1.17008e-206	5.08212e-202	0.139	0.378	transmembrane protein 176B [Source:HGNC Symbol;Acc:HGNC:29596]	GO:0005634(nucleus);GO:0009887(animal organ morphogenesis);GO:0016020(membrane);GO:0016021(integral component of membrane);GO:0030154(cell differentiation);GO:0031965(nuclear membrane);GO:2001199(negative regulation of dendritic cell differentiation)	NA	down
ENSG00000165072	MAMDC2	-0.497052	1.50081e-206	6.5186e-202	0.004	0.113	MAM domain containing 2 [Source:HGNC Symbol;Acc:HGNC:23673]	GO:0005576(extracellular region);GO:0005783(endoplasmic reticulum);GO:0016020(membrane)	NA	down
ENSG00000166794	PPIB	0.77255	7.21503e-206	3.13378e-201	0.664	0.471	peptidylprolyl isomerase B [Source:HGNC Symbol;Acc:HGNC:9255]	GO:0000413(protein peptidyl-prolyl isomerization);GO:0003723(RNA binding);GO:0003755(peptidyl-prolyl cis-trans isomerase activity);GO:0005515(protein binding);GO:0005518(collagen binding);GO:0005634(nucleus);GO:0005783(endoplasmic reticulum);GO:0005788(endoplasmic reticulum lumen);GO:0005790(smooth endoplasmic reticulum);GO:0005925(focal adhesion);GO:0006457(protein folding);GO:0016018(cyclospori…	NA	up
ENSG00000180353	HCLS1	-0.654831	1.12829e-204	4.90062e-200	0.625	0.799	hematopoietic cell-specific Lyn substrate 1 [Source:HGNC Symbol;Acc:HGNC:4844]	GO:0000122(negative regulation of transcription by RNA polymerase II);GO:0001085(RNA polymerase II transcription factor binding);GO:0003779(actin binding);GO:0005515(protein binding);GO:0005634(nucleus);GO:0005667(transcription factor complex);GO:0005737(cytoplasm);GO:0005739(mitochondrion);GO:0005829(cytosol);GO:0005886(plasma membrane);GO:0006355(regulation of transcription, DNA-templated);GO:0…	04530(Tight junction);05100(Bacterial invasion of epithelial cells);05130(Pathogenic Escherichia coli infection);05131(Shigellosis);05205(Proteoglycans in cancer)	down
ENSG00000081189	MEF2C	-0.699336	1.28827e-204	5.59548e-200	0.347	0.626	myocyte enhancer factor 2C [Source:HGNC Symbol;Acc:HGNC:6996]	GO:0000122(negative regulation of transcription by RNA polymerase II);GO:0000165(MAPK cascade);GO:0000790(nuclear chromatin);GO:0000977(RNA polymerase II regulatory region sequence-specific DNA binding);GO:0000978(RNA polymerase II proximal promoter sequence-specific DNA binding);GO:0000980(RNA polymerase II distal enhancer sequence-specific DNA binding);GO:0000981(DNA-binding transcription facto…	04010(MAPK signaling pathway);04022(cGMP-PKG signaling pathway);04371(Apelin signaling pathway);04921(Oxytocin signaling pathway);04928(Parathyroid hormone synthesis, secretion and action);05202(Transcriptional misregulation in cancer);05418(Fluid shear stress and atherosclerosis)	down
ENSG00000150782	IL18	-0.753946	1.79713e-204	7.80567e-200	0.242	0.496	interleukin 18 [Source:HGNC Symbol;Acc:HGNC:5986]	GO:0000165(MAPK cascade);GO:0001525(angiogenesis);GO:0005125(cytokine activity);GO:0005515(protein binding);GO:0005576(extracellular region);GO:0005615(extracellular space);GO:0005829(cytosol);GO:0006954(inflammatory response);GO:0006955(immune response);GO:0007267(cell-cell signaling);GO:0008283(cell population proliferation);GO:0010469(regulation of signaling receptor activity);GO:0010628(posit…	04060(Cytokine-cytokine receptor interaction);04621(NOD-like receptor signaling pathway);04623(Cytosolic DNA-sensing pathway);05132(Salmonella infection);05134(Legionellosis);05143(African trypanosomiasis);05144(Malaria);05152(Tuberculosis);05164(Influenza A);05321(Inflammatory bowel disease (IBD));05323(Rheumatoid arthritis)	down
ENSG00000183864	TOB2	-0.738001	3.3655e-204	1.46177e-199	0.167	0.408	transducer of ERBB2, 2 [Source:HGNC Symbol;Acc:HGNC:11980]	GO:0003714(transcription corepressor activity);GO:0005515(protein binding);GO:0005634(nucleus);GO:0005737(cytoplasm);GO:0005829(cytosol);GO:0007292(female gamete generation);GO:0008285(negative regulation of cell population proliferation);GO:0010468(regulation of gene expression);GO:0042809(vitamin D receptor binding);GO:0045671(negative regulation of osteoclast differentiation);GO:0045778(positi…	03018(RNA degradation)	down
ENSG00000042753	AP2S1	0.684436	3.4021e-204	1.47767e-199	0.758	0.628	adaptor related protein complex 2 subunit sigma 1 [Source:HGNC Symbol;Acc:HGNC:565]	GO:0005215(transporter activity);GO:0005515(protein binding);GO:0005829(cytosol);GO:0005886(plasma membrane);GO:0005905(clathrin-coated pit);GO:0006886(intracellular protein transport);GO:0006897(endocytosis);GO:0008565(protein transporter activity);GO:0015031(protein transport);GO:0016020(membrane);GO:0016192(vesicle-mediated transport);GO:0019886(antigen processing and presentation of exogenous…	04144(Endocytosis);04721(Synaptic vesicle cycle);04961(Endocrine and other factor-regulated calcium reabsorption);05016(Huntington disease)	up
ENSG00000011600	TYROBP	0.437862	4.41468e-204	1.91747e-199	0.974	0.962	TYRO protein tyrosine kinase binding protein [Source:HGNC Symbol;Acc:HGNC:12449]	GO:0002274(myeloid leukocyte activation);GO:0002281(macrophage activation involved in immune response);GO:0002282(microglial cell activation involved in immune response);GO:0002283(neutrophil activation involved in immune response);GO:0005102(signaling receptor binding);GO:0005515(protein binding);GO:0005623(cell);GO:0005886(plasma membrane);GO:0005887(integral component of plasma membrane);GO:00…	04380(Osteoclast differentiation);04650(Natural killer cell mediated cytotoxicity)	up
ENSG00000106211	HSPB1	-0.836624	6.08075e-204	2.64111e-199	0.402	0.64	heat shock protein family B (small) member 1 [Source:HGNC Symbol;Acc:HGNC:5246]	GO:0000502(proteasome complex);GO:0001895(retina homeostasis);GO:0001932(regulation of protein phosphorylation);GO:0003723(RNA binding);GO:0005080(protein kinase C binding);GO:0005515(protein binding);GO:0005615(extracellular space);GO:0005634(nucleus);GO:0005737(cytoplasm);GO:0005819(spindle);GO:0005829(cytosol);GO:0005856(cytoskeleton);GO:0005886(plasma membrane);GO:0005925(focal adhesion);GO:0…	04010(MAPK signaling pathway);04370(VEGF signaling pathway);05146(Amoebiasis)	down
ENSG00000177575	CD163	-0.368507	2.07354e-203	9.00621e-199	0.874	0.96	CD163 molecule [Source:HGNC Symbol;Acc:HGNC:1631]	GO:0005044(scavenger receptor activity);GO:0005515(protein binding);GO:0005576(extracellular region);GO:0005886(plasma membrane);GO:0005887(integral component of plasma membrane);GO:0006898(receptor-mediated endocytosis);GO:0006953(acute-phase response);GO:0006954(inflammatory response);GO:0009897(external side of plasma membrane);GO:0016020(membrane);GO:0016021(integral component of membrane);GO…	NA	down
ENSG00000168546	GFRA2	-0.479081	4.77594e-203	2.07438e-198	0.02	0.166	GDNF family receptor alpha 2 [Source:HGNC Symbol;Acc:HGNC:4244]	GO:0000165(MAPK cascade);GO:0005886(plasma membrane);GO:0007169(transmembrane receptor protein tyrosine kinase signaling pathway);GO:0007399(nervous system development);GO:0007411(axon guidance);GO:0009897(external side of plasma membrane);GO:0016020(membrane);GO:0016167(glial cell-derived neurotrophic factor receptor activity);GO:0019898(extrinsic component of membrane);GO:0031225(anchored compo…	NA	down
ENSG00000156508	EEF1A1	-0.428195	2.35412e-202	1.02249e-197	0.987	0.992	eukaryotic translation elongation factor 1 alpha 1 [Source:HGNC Symbol;Acc:HGNC:3189]	GO:0000049(tRNA binding);GO:0000166(nucleotide binding);GO:0003723(RNA binding);GO:0003746(translation elongation factor activity);GO:0003924(GTPase activity);GO:0005515(protein binding);GO:0005516(calmodulin binding);GO:0005525(GTP binding);GO:0005576(extracellular region);GO:0005615(extracellular space);GO:0005634(nucleus);GO:0005730(nucleolus);GO:0005737(cytoplasm);GO:0005829(cytosol);GO:00058…	03013(RNA transport);05134(Legionellosis)	down
ENSG00000044574	HSPA5	1.00922	3.6394e-202	1.58074e-197	0.664	0.507	heat shock protein family A (Hsp70) member 5 [Source:HGNC Symbol;Acc:HGNC:5238]	GO:0000166(nucleotide binding);GO:0001554(luteolysis);GO:0005509(calcium ion binding);GO:0005515(protein binding);GO:0005524(ATP binding);GO:0005634(nucleus);GO:0005737(cytoplasm);GO:0005739(mitochondrion);GO:0005783(endoplasmic reticulum);GO:0005788(endoplasmic reticulum lumen);GO:0005789(endoplasmic reticulum membrane);GO:0005790(smooth endoplasmic reticulum);GO:0005793(endoplasmic reticulum-Go…	03060(Protein export);04141(Protein processing in endoplasmic reticulum);04612(Antigen processing and presentation);04918(Thyroid hormone synthesis);05020(Prion diseases)	up
ENSG00000150093	ITGB1	0.767737	7.26232e-202	3.15432e-197	0.638	0.47	integrin subunit beta 1 [Source:HGNC Symbol;Acc:HGNC:6153]	GO:0000082(G1/S transition of mitotic cell cycle);GO:0001618(virus receptor activity);GO:0001701(in utero embryonic development);GO:0001708(cell fate specification);GO:0001726(ruffle);GO:0001968(fibronectin binding);GO:0002020(protease binding);GO:0002042(cell migration involved in sprouting angiogenesis);GO:0003779(actin binding);GO:0005178(integrin binding);GO:0005515(protein binding);GO:000573…	04015(Rap1 signaling pathway);04145(Phagosome);04151(PI3K-Akt signaling pathway);04360(Axon guidance);04510(Focal adhesion);04512(ECM-receptor interaction);04514(Cell adhesion molecules (CAMs));04530(Tight junction);04611(Platelet activation);04670(Leukocyte transendothelial migration);04810(Regulation of actin cytoskeleton);05100(Bacterial invasion of epithelial cells);05130(Pathogenic Escherich…	up
ENSG00000100311	PDGFB	-0.46175	9.44489e-202	4.10229e-197	0.011	0.138	platelet derived growth factor subunit B [Source:HGNC Symbol;Acc:HGNC:8800]	GO:0000139(Golgi membrane);GO:0000165(MAPK cascade);GO:0001892(embryonic placenta development);GO:0001938(positive regulation of endothelial cell proliferation);GO:0002548(monocyte chemotaxis);GO:0002576(platelet degranulation);GO:0003104(positive regulation of glomerular filtration);GO:0005161(platelet-derived growth factor receptor binding);GO:0005515(protein binding);GO:0005518(collagen bindin…	01521(EGFR tyrosine kinase inhibitor resistance);04010(MAPK signaling pathway);04014(Ras signaling pathway);04015(Rap1 signaling pathway);04072(Phospholipase D signaling pathway);04151(PI3K-Akt signaling pathway);04510(Focal adhesion);04540(Gap junction);04630(Jak-STAT signaling pathway);04810(Regulation of actin cytoskeleton);05167(Kaposi sarcoma-associated herpesvirus infection);05200(Pathways …	down
ENSG00000114796	KLHL24	-0.699702	1.08833e-201	4.72703e-197	0.118	0.347	kelch like family member 24 [Source:HGNC Symbol;Acc:HGNC:25947]	GO:0005515(protein binding);GO:0005737(cytoplasm);GO:0005912(adherens junction);GO:0016567(protein ubiquitination);GO:0030054(cell junction);GO:0030057(desmosome);GO:0030424(axon);GO:0031463(Cul3-RING ubiquitin ligase complex);GO:0042995(cell projection);GO:0043204(perikaryon);GO:0045109(intermediate filament organization);GO:0051865(protein autoubiquitination);GO:2000312(regulation of kainate se…	NA	down
ENSG00000151491	EPS8	-0.709901	2.39104e-201	1.03853e-196	0.178	0.429	epidermal growth factor receptor pathway substrate 8 [Source:HGNC Symbol;Acc:HGNC:3420]	GO:0003779(actin binding);GO:0005070(SH3/SH2 adaptor activity);GO:0005515(protein binding);GO:0005737(cytoplasm);GO:0005886(plasma membrane);GO:0005903(brush border);GO:0005938(cell cortex);GO:0007165(signal transduction);GO:0007173(epidermal growth factor receptor signaling pathway);GO:0007266(Rho protein signal transduction);GO:0008283(cell population proliferation);GO:0008344(adult locomotory …	NA	down
ENSG00000107796	ACTA2	-0.746552	3.0004e-201	1.3032e-196	0.06	0.243	actin, alpha 2, smooth muscle, aorta [Source:HGNC Symbol;Acc:HGNC:130]	GO:0000166(nucleotide binding);GO:0005524(ATP binding);GO:0005615(extracellular space);GO:0005737(cytoplasm);GO:0005829(cytosol);GO:0005856(cytoskeleton);GO:0006936(muscle contraction);GO:0008217(regulation of blood pressure);GO:0009615(response to virus);GO:0010628(positive regulation of gene expression);GO:0014829(vascular smooth muscle contraction);GO:0015629(actin cytoskeleton);GO:0019901(pro…	04270(Vascular smooth muscle contraction);04371(Apelin signaling pathway);04926(Relaxin signaling pathway)	down
ENSG00000171051	FPR1	0.862379	7.10381e-200	3.08547e-195	0.58	0.341	formyl peptide receptor 1 [Source:HGNC Symbol;Acc:HGNC:3826]	GO:0000187(activation of MAPK activity);GO:0001664(G protein-coupled receptor binding);GO:0002430(complement receptor mediated signaling pathway);GO:0004930(G protein-coupled receptor activity);GO:0004982(N-formyl peptide receptor activity);GO:0005124(scavenger receptor binding);GO:0005515(protein binding);GO:0005737(cytoplasm);GO:0005886(plasma membrane);GO:0006935(chemotaxis);GO:0006954(inflamm…	04015(Rap1 signaling pathway);04080(Neuroactive ligand-receptor interaction);05150(Staphylococcus aureus infection)	up
ENSG00000170275	CRTAP	-0.714244	2.25084e-199	9.77632e-195	0.278	0.536	cartilage associated protein [Source:HGNC Symbol;Acc:HGNC:2379]	GO:0005515(protein binding);GO:0005576(extracellular region);GO:0005615(extracellular space);GO:0005783(endoplasmic reticulum);GO:0005788(endoplasmic reticulum lumen);GO:0007283(spermatogenesis);GO:0018400(peptidyl-proline hydroxylation to 3-hydroxy-L-proline);GO:0032991(protein-containing complex);GO:0050821(protein stabilization);GO:0061077(chaperone-mediated protein folding);GO:1901874(negativ…	NA	down
ENSG00000205726	ITSN1	-0.701932	1.52999e-198	6.64538e-194	0.118	0.345	intersectin 1 [Source:HGNC Symbol;Acc:HGNC:6183]	GO:0005085(guanyl-nucleotide exchange factor activity);GO:0005089(Rho guanyl-nucleotide exchange factor activity);GO:0005509(calcium ion binding);GO:0005515(protein binding);GO:0005634(nucleus);GO:0005635(nuclear envelope);GO:0005737(cytoplasm);GO:0005768(endosome);GO:0005829(cytosol);GO:0005886(plasma membrane);GO:0005905(clathrin-coated pit);GO:0006887(exocytosis);GO:0006897(endocytosis);GO:000…	NA	down
ENSG00000213853	EMP2	-0.436695	2.20248e-197	9.56624e-193	0.013	0.142	epithelial membrane protein 2 [Source:HGNC Symbol;Acc:HGNC:3334]	GO:0000139(Golgi membrane);GO:0001765(membrane raft assembly);GO:0001913(T cell mediated cytotoxicity);GO:0001952(regulation of cell-matrix adhesion);GO:0001954(positive regulation of cell-matrix adhesion);GO:0003093(regulation of glomerular filtration);GO:0005178(integrin binding);GO:0005515(protein binding);GO:0005634(nucleus);GO:0005737(cytoplasm);GO:0005794(Golgi apparatus);GO:0005829(cytosol…	NA	down
ENSG00000120709	FAM53C	-0.742199	1.65261e-196	7.17796e-192	0.197	0.447	family with sequence similarity 53 member C [Source:HGNC Symbol;Acc:HGNC:1336]	GO:0005515(protein binding)	NA	down
ENSG00000106952	TNFSF8	0.746856	4.31712e-195	1.8751e-190	0.225	0.034	TNF superfamily member 8 [Source:HGNC Symbol;Acc:HGNC:11938]	GO:0005102(signaling receptor binding);GO:0005125(cytokine activity);GO:0005164(tumor necrosis factor receptor binding);GO:0005515(protein binding);GO:0005615(extracellular space);GO:0005886(plasma membrane);GO:0005887(integral component of plasma membrane);GO:0006915(apoptotic process);GO:0006955(immune response);GO:0007165(signal transduction);GO:0007267(cell-cell signaling);GO:0008283(cell pop…	04060(Cytokine-cytokine receptor interaction)	up
ENSG00000090621	PABPC4	-0.700808	9.28107e-195	4.03114e-190	0.46	0.678	poly(A) binding protein cytoplasmic 4 [Source:HGNC Symbol;Acc:HGNC:8557]	GO:0003676(nucleic acid binding);GO:0003723(RNA binding);GO:0003729(mRNA binding);GO:0003730(mRNA 3'-UTR binding);GO:0005515(protein binding);GO:0005634(nucleus);GO:0005737(cytoplasm);GO:0005829(cytosol);GO:0006396(RNA processing);GO:0006401(RNA catabolic process);GO:0006412(translation);GO:0007596(blood coagulation);GO:0008143(poly(A) binding);GO:0008266(poly(U) RNA binding);GO:0010494(cytoplasm…	03013(RNA transport);03015(mRNA surveillance pathway);03018(RNA degradation)	down
ENSG00000214063	TSPAN4	-0.70659	1.22322e-194	5.31296e-190	0.137	0.361	tetraspanin 4 [Source:HGNC Symbol;Acc:HGNC:11859]	GO:0003823(antigen binding);GO:0005178(integrin binding);GO:0005515(protein binding);GO:0005886(plasma membrane);GO:0005887(integral component of plasma membrane);GO:0005925(focal adhesion);GO:0007166(cell surface receptor signaling pathway);GO:0016020(membrane);GO:0016021(integral component of membrane);GO:0031982(vesicle);GO:0065003(protein-containing complex assembly)	NA	down
ENSG00000116729	WLS	-0.629741	1.68227e-194	7.30677e-190	0.053	0.23	Wnt ligand secretion mediator [Source:HGNC Symbol;Acc:HGNC:30238]	GO:0000139(Golgi membrane);GO:0001707(mesoderm formation);GO:0005515(protein binding);GO:0005768(endosome);GO:0005769(early endosome);GO:0005783(endoplasmic reticulum);GO:0005789(endoplasmic reticulum membrane);GO:0005794(Golgi apparatus);GO:0005802(trans-Golgi network);GO:0005886(plasma membrane);GO:0006886(intracellular protein transport);GO:0007275(multicellular organism development);GO:000994…	NA	down
ENSG00000183688	RFLNB	0.719957	3.03104e-194	1.3165e-189	0.239	0.037	refilin B [Source:HGNC Symbol;Acc:HGNC:28705]	GO:0001837(epithelial to mesenchymal transition);GO:0005737(cytoplasm);GO:0005856(cytoskeleton);GO:0015629(actin cytoskeleton);GO:0030036(actin cytoskeleton organization);GO:0031005(filamin binding);GO:0032432(actin filament bundle);GO:0048705(skeletal system morphogenesis);GO:0061181(regulation of chondrocyte development);GO:0061182(negative regulation of chondrocyte development);GO:0061572(acti…	NA	up
ENSG00000163735	CXCL5	1.9137	4.73566e-192	2.05689e-187	0.164	0.006	C-X-C motif chemokine ligand 5 [Source:HGNC Symbol;Acc:HGNC:10642]	GO:0005125(cytokine activity);GO:0005515(protein binding);GO:0005576(extracellular region);GO:0005615(extracellular space);GO:0006935(chemotaxis);GO:0006952(defense response);GO:0006954(inflammatory response);GO:0006955(immune response);GO:0007165(signal transduction);GO:0007186(G protein-coupled receptor signaling pathway);GO:0007267(cell-cell signaling);GO:0008009(chemokine activity);GO:0008284…	04060(Cytokine-cytokine receptor interaction);04062(Chemokine signaling pathway);04657(IL-17 signaling pathway);04668(TNF signaling pathway);05133(Pertussis);05323(Rheumatoid arthritis)	up
ENSG00000117410	ATP6V0B	0.630964	8.64449e-192	3.75465e-187	0.772	0.655	ATPase H+ transporting V0 subunit b [Source:HGNC Symbol;Acc:HGNC:861]	GO:0005215(transporter activity);GO:0005768(endosome);GO:0005773(vacuole);GO:0005774(vacuolar membrane);GO:0006811(ion transport);GO:0008286(insulin receptor signaling pathway);GO:0010008(endosome membrane);GO:0015078(proton transmembrane transporter activity);GO:0015991(ATP hydrolysis coupled proton transport);GO:0016020(membrane);GO:0016021(integral component of membrane);GO:0016241(regulation …	00190(Oxidative phosphorylation);04142(Lysosome);04145(Phagosome);04721(Synaptic vesicle cycle);05110(Vibrio cholerae infection);05120(Epithelial cell signaling in Helicobacter pylori infection);05152(Tuberculosis);05165(Human papillomavirus infection);05323(Rheumatoid arthritis)	up
ENSG00000144674	GOLGA4	-0.749111	1.16064e-191	5.04114e-187	0.347	0.595	golgin A4 [Source:HGNC Symbol;Acc:HGNC:4427]	GO:0000139(Golgi membrane);GO:0005515(protein binding);GO:0005737(cytoplasm);GO:0005794(Golgi apparatus);GO:0005802(trans-Golgi network);GO:0005829(cytosol);GO:0016020(membrane);GO:0016192(vesicle-mediated transport);GO:0043001(Golgi to plasma membrane protein transport);GO:0043231(intracellular membrane-bounded organelle);GO:0045773(positive regulation of axon extension);GO:0051020(GTPase bindin…	NA	down
ENSG00000105669	COPE	0.73391	1.42235e-191	6.17785e-187	0.605	0.373	coatomer protein complex subunit epsilon [Source:HGNC Symbol;Acc:HGNC:2234]	GO:0000139(Golgi membrane);GO:0005198(structural molecule activity);GO:0005515(protein binding);GO:0005654(nucleoplasm);GO:0005737(cytoplasm);GO:0005789(endoplasmic reticulum membrane);GO:0005794(Golgi apparatus);GO:0005829(cytosol);GO:0006888(endoplasmic reticulum to Golgi vesicle-mediated transport);GO:0006890(retrograde vesicle-mediated transport, Golgi to endoplasmic reticulum);GO:0006891(int…	NA	up
ENSG00000140836	ZFHX3	-0.739134	1.48312e-191	6.44179e-187	0.311	0.571	zinc finger homeobox 3 [Source:HGNC Symbol;Acc:HGNC:777]	GO:0000122(negative regulation of transcription by RNA polymerase II);GO:0000978(RNA polymerase II proximal promoter sequence-specific DNA binding);GO:0000981(DNA-binding transcription factor activity, RNA polymerase II-specific);GO:0001227(DNA-binding transcription repressor activity, RNA polymerase II-specific);GO:0003676(nucleic acid binding);GO:0003677(DNA binding);GO:0003700(DNA-binding tran…	04550(Signaling pathways regulating pluripotency of stem cells)	down
ENSG00000111328	CDK2AP1	-0.679265	1.58143e-190	6.86879e-186	0.163	0.384	cyclin dependent kinase 2 associated protein 1 [Source:HGNC Symbol;Acc:HGNC:14002]	GO:0001934(positive regulation of protein phosphorylation);GO:0005515(protein binding);GO:0005634(nucleus);GO:0005654(nucleoplasm);GO:0005829(cytosol);GO:0006261(DNA-dependent DNA replication);GO:0007049(cell cycle);GO:0048471(perinuclear region of cytoplasm);GO:0070182(DNA polymerase binding)	NA	down
ENSG00000136842	TMOD1	-0.359017	2.92709e-190	1.27135e-185	0.006	0.116	tropomodulin 1 [Source:HGNC Symbol;Acc:HGNC:11871]	GO:0003779(actin binding);GO:0005523(tropomyosin binding);GO:0005737(cytoplasm);GO:0005829(cytosol);GO:0005856(cytoskeleton);GO:0005865(striated muscle thin filament);GO:0005884(actin filament);GO:0006936(muscle contraction);GO:0008180(COP9 signalosome);GO:0008344(adult locomotory behavior);GO:0016020(membrane);GO:0030016(myofibril);GO:0030017(sarcomere);GO:0030049(muscle filament sliding);GO:003…	NA	down
ENSG00000277791	PSMB3	0.763399	4.60135e-190	1.99855e-185	0.554	0.313	proteasome subunit beta 3 [Source:HGNC Symbol;Acc:HGNC:9540]	GO:0000165(MAPK cascade);GO:0000209(protein polyubiquitination);GO:0000502(proteasome complex);GO:0002223(stimulatory C-type lectin receptor signaling pathway);GO:0002479(antigen processing and presentation of exogenous peptide antigen via MHC class I, TAP-dependent);GO:0004175(endopeptidase activity);GO:0004298(threonine-type endopeptidase activity);GO:0005515(protein binding);GO:0005634(nucleus…	03050(Proteasome)	up
ENSG00000130592	LSP1	0.866193	1.10027e-188	4.77893e-184	0.368	0.132	lymphocyte specific protein 1 [Source:HGNC Symbol;Acc:HGNC:6707]	GO:0003779(actin binding);GO:0005886(plasma membrane);GO:0006968(cellular defense response);GO:0007165(signal transduction);GO:0015629(actin cytoskeleton);GO:0016020(membrane);GO:0070062(extracellular exosome)	04625(C-type lectin receptor signaling pathway);05152(Tuberculosis)	up
ENSG00000134028	ADAMDEC1	-0.439757	1.9228e-188	8.35149e-184	0.006	0.114	ADAM like decysin 1 [Source:HGNC Symbol;Acc:HGNC:16299]	GO:0004222(metalloendopeptidase activity);GO:0005575(cellular_component);GO:0005576(extracellular region);GO:0006508(proteolysis);GO:0006955(immune response);GO:0007162(negative regulation of cell adhesion);GO:0008233(peptidase activity);GO:0008237(metallopeptidase activity);GO:0008270(zinc ion binding);GO:0016787(hydrolase activity);GO:0046872(metal ion binding);GO:0062023(collagen-containing ex…	NA	down
ENSG00000148483	TMEM236	-0.419462	4.71193e-188	2.04658e-183	0.012	0.134	transmembrane protein 236 [Source:HGNC Symbol;Acc:HGNC:23473]	GO:0016020(membrane);GO:0016021(integral component of membrane)	NA	down
ENSG00000051108	HERPUD1	-0.70438	5.07147e-188	2.20274e-183	0.502	0.723	homocysteine inducible ER protein with ubiquitin like domain 1 [Source:HGNC Symbol;Acc:HGNC:13744]	GO:0003674(molecular_function);GO:0005515(protein binding);GO:0005783(endoplasmic reticulum);GO:0005789(endoplasmic reticulum membrane);GO:0006511(ubiquitin-dependent protein catabolic process);GO:0006874(cellular calcium ion homeostasis);GO:0006986(response to unfolded protein);GO:0016020(membrane);GO:0016021(integral component of membrane);GO:0030968(endoplasmic reticulum unfolded protein respo…	04141(Protein processing in endoplasmic reticulum)	down
ENSG00000151240	DIP2C	-0.369584	9.74097e-188	4.23089e-183	0.004	0.103	disco interacting protein 2 homolog C [Source:HGNC Symbol;Acc:HGNC:29150]	GO:0003674(molecular_function);GO:0003824(catalytic activity);GO:0005575(cellular_component);GO:0008150(biological_process)	NA	down
ENSG00000197061	HIST1H4C	-0.69259	2.65855e-187	1.15471e-182	0.135	0.339	histone cluster 1 H4 family member c [Source:HGNC Symbol;Acc:HGNC:4787]	GO:0000183(chromatin silencing at rDNA);GO:0000228(nuclear chromosome);GO:0000784(nuclear chromosome, telomeric region);GO:0000786(nucleosome);GO:0000788(nuclear nucleosome);GO:0003677(DNA binding);GO:0003723(RNA binding);GO:0005515(protein binding);GO:0005576(extracellular region);GO:0005634(nucleus);GO:0005654(nucleoplasm);GO:0005694(chromosome);GO:0006303(double-strand break repair via nonhomo…	05034(Alcoholism);05203(Viral carcinogenesis);05322(Systemic lupus erythematosus)	down
ENSG00000071082	RPL31	-0.596249	5.58907e-186	2.42756e-181	0.679	0.802	ribosomal protein L31 [Source:HGNC Symbol;Acc:HGNC:10334]	GO:0000184(nuclear-transcribed mRNA catabolic process, nonsense-mediated decay);GO:0002181(cytoplasmic translation);GO:0003723(RNA binding);GO:0003735(structural constituent of ribosome);GO:0005515(protein binding);GO:0005622(intracellular);GO:0005829(cytosol);GO:0005840(ribosome);GO:0005925(focal adhesion);GO:0006412(translation);GO:0006413(translational initiation);GO:0006614(SRP-dependent cotr…	03010(Ribosome)	down
ENSG00000245910	SNHG6	-0.684109	8.05251e-184	3.49753e-179	0.375	0.59	small nucleolar RNA host gene 6 [Source:HGNC Symbol;Acc:HGNC:32965]	NA	NA	down
ENSG00000123983	ACSL3	0.850073	1.84065e-183	7.99467e-179	0.476	0.259	acyl-CoA synthetase long chain family member 3 [Source:HGNC Symbol;Acc:HGNC:3570]	GO:0000166(nucleotide binding);GO:0001676(long-chain fatty acid metabolic process);GO:0003824(catalytic activity);GO:0004467(long-chain fatty acid-CoA ligase activity);GO:0005524(ATP binding);GO:0005739(mitochondrion);GO:0005741(mitochondrial outer membrane);GO:0005777(peroxisome);GO:0005778(peroxisomal membrane);GO:0005783(endoplasmic reticulum);GO:0005789(endoplasmic reticulum membrane);GO:0005…	00061(Fatty acid biosynthesis);00071(Fatty acid degradation);03320(PPAR signaling pathway);04146(Peroxisome);04216(Ferroptosis);04714(Thermogenesis);04920(Adipocytokine signaling pathway)	up
ENSG00000136068	FLNB	0.645487	4.40509e-183	1.91331e-178	0.221	0.031	filamin B [Source:HGNC Symbol;Acc:HGNC:3755]	GO:0001725(stress fiber);GO:0003334(keratinocyte development);GO:0003382(epithelial cell morphogenesis);GO:0003723(RNA binding);GO:0003779(actin binding);GO:0005515(protein binding);GO:0005634(nucleus);GO:0005737(cytoplasm);GO:0005829(cytosol);GO:0005856(cytoskeleton);GO:0005886(plasma membrane);GO:0005903(brush border);GO:0005925(focal adhesion);GO:0005938(cell cortex);GO:0007016(cytoskeletal an…	04010(MAPK signaling pathway);04510(Focal adhesion);05132(Salmonella infection);05205(Proteoglycans in cancer)	up
ENSG00000130203	APOE	-0.597173	7.1043e-183	3.08568e-178	0.181	0.409	apolipoprotein E [Source:HGNC Symbol;Acc:HGNC:613]	GO:0000302(response to reactive oxygen species);GO:0001523(retinoid metabolic process);GO:0001540(amyloid-beta binding);GO:0001937(negative regulation of endothelial cell proliferation);GO:0002021(response to dietary excess);GO:0005102(signaling receptor binding);GO:0005198(structural molecule activity);GO:0005319(lipid transporter activity);GO:0005515(protein binding);GO:0005543(phospholipid bin…	04979(Cholesterol metabolism);05010(Alzheimer disease)	down
ENSG00000109475	RPL34	-0.49267	7.95843e-183	3.45666e-178	0.935	0.968	ribosomal protein L34 [Source:HGNC Symbol;Acc:HGNC:10340]	GO:0000184(nuclear-transcribed mRNA catabolic process, nonsense-mediated decay);GO:0003723(RNA binding);GO:0003735(structural constituent of ribosome);GO:0005622(intracellular);GO:0005737(cytoplasm);GO:0005783(endoplasmic reticulum);GO:0005829(cytosol);GO:0005840(ribosome);GO:0006412(translation);GO:0006413(translational initiation);GO:0006614(SRP-dependent cotranslational protein targeting to me…	03010(Ribosome)	down
ENSG00000102144	PGK1	0.737278	1.27698e-181	5.54645e-177	0.632	0.478	phosphoglycerate kinase 1 [Source:HGNC Symbol;Acc:HGNC:8896]	GO:0000166(nucleotide binding);GO:0004618(phosphoglycerate kinase activity);GO:0005515(protein binding);GO:0005524(ATP binding);GO:0005615(extracellular space);GO:0005737(cytoplasm);GO:0005829(cytosol);GO:0006094(gluconeogenesis);GO:0006096(glycolytic process);GO:0016020(membrane);GO:0016301(kinase activity);GO:0016310(phosphorylation);GO:0016525(negative regulation of angiogenesis);GO:0016740(tr…	00010(Glycolysis / Gluconeogenesis);04066(HIF-1 signaling pathway)	up
ENSG00000159128	IFNGR2	0.744004	1.86606e-181	8.10503e-177	0.595	0.394	interferon gamma receptor 2 [Source:HGNC Symbol;Acc:HGNC:5440]	GO:0000139(Golgi membrane);GO:0004896(cytokine receptor activity);GO:0004906(interferon-gamma receptor activity);GO:0005515(protein binding);GO:0005737(cytoplasm);GO:0005783(endoplasmic reticulum);GO:0005789(endoplasmic reticulum membrane);GO:0005794(Golgi apparatus);GO:0005886(plasma membrane);GO:0005887(integral component of plasma membrane);GO:0007166(cell surface receptor signaling pathway);G…	04060(Cytokine-cytokine receptor interaction);04066(HIF-1 signaling pathway);04217(Necroptosis);04380(Osteoclast differentiation);04630(Jak-STAT signaling pathway);04650(Natural killer cell mediated cytotoxicity);04658(Th1 and Th2 cell differentiation);04659(Th17 cell differentiation);05132(Salmonella infection);05140(Leishmaniasis);05142(Chagas disease (American trypanosomiasis));05145(Toxoplasm…	up
ENSG00000149212	SESN3	-0.589735	2.06966e-181	8.98937e-177	0.068	0.254	sestrin 3 [Source:HGNC Symbol;Acc:HGNC:23060]	GO:0005515(protein binding);GO:0005634(nucleus);GO:0005737(cytoplasm);GO:0016239(positive regulation of macroautophagy);GO:0016491(oxidoreductase activity);GO:0016684(oxidoreductase activity, acting on peroxide as acceptor);GO:0031932(TORC2 complex);GO:0032868(response to insulin);GO:0034198(cellular response to amino acid starvation);GO:0038203(TORC2 signaling);GO:0042149(cellular response to gl…	04115(p53 signaling pathway);04211(Longevity regulating pathway)	down
ENSG00000070961	ATP2B1	0.8381	6.42689e-181	2.79145e-176	0.602	0.425	ATPase plasma membrane Ca2+ transporting 1 [Source:HGNC Symbol;Acc:HGNC:814]	GO:0000166(nucleotide binding);GO:0001772(immunological synapse);GO:0001818(negative regulation of cytokine production);GO:0003056(regulation of vascular smooth muscle contraction);GO:0003407(neural retina development);GO:0005388(calcium-transporting ATPase activity);GO:0005515(protein binding);GO:0005516(calmodulin binding);GO:0005524(ATP binding);GO:0005634(nucleus);GO:0005886(plasma membrane);…	04020(Calcium signaling pathway);04022(cGMP-PKG signaling pathway);04024(cAMP signaling pathway);04261(Adrenergic signaling in cardiomyocytes);04925(Aldosterone synthesis and secretion);04961(Endocrine and other factor-regulated calcium reabsorption);04970(Salivary secretion);04972(Pancreatic secretion);04978(Mineral absorption)	up
ENSG00000085832	EPS15	-0.673842	7.12185e-181	3.0933e-176	0.232	0.478	epidermal growth factor receptor pathway substrate 15 [Source:HGNC Symbol;Acc:HGNC:3419]	GO:0001921(positive regulation of receptor recycling);GO:0005509(calcium ion binding);GO:0005515(protein binding);GO:0005737(cytoplasm);GO:0005768(endosome);GO:0005769(early endosome);GO:0005829(cytosol);GO:0005886(plasma membrane);GO:0005905(clathrin-coated pit);GO:0006895(Golgi to endosome transport);GO:0006897(endocytosis);GO:0007173(epidermal growth factor receptor signaling pathway);GO:00082…	04144(Endocytosis)	down
ENSG00000280222	AL365209.1	-0.316416	2.86275e-179	1.24341e-174	0.001	0.083	TEC	NA	NA	no_diff
ENSG00000123358	NR4A1	-0.742937	8.63128e-179	3.74891e-174	0.425	0.637	nuclear receptor subfamily 4 group A member 1 [Source:HGNC Symbol;Acc:HGNC:7980]	GO:0000977(RNA polymerase II regulatory region sequence-specific DNA binding);GO:0000978(RNA polymerase II proximal promoter sequence-specific DNA binding);GO:0000981(DNA-binding transcription factor activity, RNA polymerase II-specific);GO:0001228(DNA-binding transcription activator activity, RNA polymerase II-specific);GO:0001938(positive regulation of endothelial cell proliferation);GO:0002042…	04010(MAPK signaling pathway);04151(PI3K-Akt signaling pathway);04925(Aldosterone synthesis and secretion);04927(Cortisol synthesis and secretion);04934(Cushing syndrome)	down
ENSG00000151247	EIF4E	0.879579	6.60688e-178	2.86963e-173	0.476	0.228	eukaryotic translation initiation factor 4E [Source:HGNC Symbol;Acc:HGNC:3287]	GO:0000082(G1/S transition of mitotic cell cycle);GO:0000339(RNA cap binding);GO:0000340(RNA 7-methylguanosine cap binding);GO:0000932(P-body);GO:0001662(behavioral fear response);GO:0003723(RNA binding);GO:0003743(translation initiation factor activity);GO:0005515(protein binding);GO:0005737(cytoplasm);GO:0005829(cytosol);GO:0005845(mRNA cap binding complex);GO:0006405(RNA export from nucleus);G…	01521(EGFR tyrosine kinase inhibitor resistance);03013(RNA transport);04066(HIF-1 signaling pathway);04150(mTOR signaling pathway);04151(PI3K-Akt signaling pathway);04211(Longevity regulating pathway);04910(Insulin signaling pathway)	up
ENSG00000109971	HSPA8	-0.643057	1.29822e-177	5.63869e-173	0.618	0.821	heat shock protein family A (Hsp70) member 8 [Source:HGNC Symbol;Acc:HGNC:5241]	GO:0000151(ubiquitin ligase complex);GO:0000166(nucleotide binding);GO:0000398(mRNA splicing, via spliceosome);GO:0000974(Prp19 complex);GO:0001664(G protein-coupled receptor binding);GO:0001786(phosphatidylserine binding);GO:0003723(RNA binding);GO:0005515(protein binding);GO:0005524(ATP binding);GO:0005576(extracellular region);GO:0005615(extracellular space);GO:0005634(nucleus);GO:0005654(nucl…	03040(Spliceosome);04010(MAPK signaling pathway);04141(Protein processing in endoplasmic reticulum);04144(Endocytosis);04213(Longevity regulating pathway - multiple species);04612(Antigen processing and presentation);04915(Estrogen signaling pathway);05134(Legionellosis);05145(Toxoplasmosis);05162(Measles);05164(Influenza A)	down
ENSG00000162772	ATF3	-0.767227	2.78519e-177	1.20972e-172	0.538	0.695	activating transcription factor 3 [Source:HGNC Symbol;Acc:HGNC:785]	GO:0000122(negative regulation of transcription by RNA polymerase II);GO:0000976(transcription regulatory region sequence-specific DNA binding);GO:0000977(RNA polymerase II regulatory region sequence-specific DNA binding);GO:0000978(RNA polymerase II proximal promoter sequence-specific DNA binding);GO:0000981(DNA-binding transcription factor activity, RNA polymerase II-specific);GO:0001227(DNA-bi…	NA	down
ENSG00000100292	HMOX1	0.786857	3.82568e-177	1.66164e-172	0.58	0.617	heme oxygenase 1 [Source:HGNC Symbol;Acc:HGNC:5013]	GO:0001525(angiogenesis);GO:0001666(response to hypoxia);GO:0001935(endothelial cell proliferation);GO:0002246(wound healing involved in inflammatory response);GO:0002686(negative regulation of leukocyte migration);GO:0004392(heme oxygenase (decyclizing) activity);GO:0004630(phospholipase D activity);GO:0005515(protein binding);GO:0005615(extracellular space);GO:0005634(nucleus);GO:0005730(nucleo…	00860(Porphyrin and chlorophyll metabolism);04066(HIF-1 signaling pathway);04216(Ferroptosis);04978(Mineral absorption);05200(Pathways in cancer);05206(MicroRNAs in cancer);05225(Hepatocellular carcinoma);05418(Fluid shear stress and atherosclerosis)	up
ENSG00000198502	HLA-DRB5	-0.830491	1.51747e-176	6.59097e-172	0.436	0.517	major histocompatibility complex, class II, DR beta 5 [Source:HGNC Symbol;Acc:HGNC:4953]	GO:0000139(Golgi membrane);GO:0002376(immune system process);GO:0002504(antigen processing and presentation of peptide or polysaccharide antigen via MHC class II);GO:0005764(lysosome);GO:0005765(lysosomal membrane);GO:0005768(endosome);GO:0005783(endoplasmic reticulum);GO:0005789(endoplasmic reticulum membrane);GO:0005794(Golgi apparatus);GO:0005886(plasma membrane);GO:0006955(immune response);GO…	04145(Phagosome);04514(Cell adhesion molecules (CAMs));04612(Antigen processing and presentation);04640(Hematopoietic cell lineage);04658(Th1 and Th2 cell differentiation);04659(Th17 cell differentiation);04672(Intestinal immune network for IgA production);04940(Type I diabetes mellitus);05140(Leishmaniasis);05145(Toxoplasmosis);05150(Staphylococcus aureus infection);05152(Tuberculosis);05164(Inf…	down
ENSG00000093072	ADA2	-0.654113	3.46665e-176	1.5057e-171	0.209	0.45	adenosine deaminase 2 [Source:HGNC Symbol;Acc:HGNC:1839]	GO:0004000(adenosine deaminase activity);GO:0005576(extracellular region);GO:0005615(extracellular space);GO:0006154(adenosine catabolic process);GO:0007275(multicellular organism development);GO:0008083(growth factor activity);GO:0008201(heparin binding);GO:0008270(zinc ion binding);GO:0010469(regulation of signaling receptor activity);GO:0016787(hydrolase activity);GO:0019239(deaminase activity…	00230(Purine metabolism)	down
ENSG00000151651	ADAM8	0.638745	1.79138e-175	7.78067e-171	0.224	0.038	ADAM metallopeptidase domain 8 [Source:HGNC Symbol;Acc:HGNC:215]	GO:0000902(cell morphogenesis);GO:0001525(angiogenesis);GO:0002102(podosome);GO:0002523(leukocyte migration involved in inflammatory response);GO:0002675(positive regulation of acute inflammatory response);GO:0002693(positive regulation of cellular extravasation);GO:0004222(metalloendopeptidase activity);GO:0004252(serine-type endopeptidase activity);GO:0005509(calcium ion binding);GO:0005515(pro…	NA	up
ENSG00000100906	NFKBIA	0.72383	5.40449e-175	2.34739e-170	0.925	0.838	NFKB inhibitor alpha [Source:HGNC Symbol;Acc:HGNC:7797]	GO:0005515(protein binding);GO:0005634(nucleus);GO:0005654(nucleoplasm);GO:0005737(cytoplasm);GO:0005829(cytosol);GO:0005886(plasma membrane);GO:0006606(protein import into nucleus);GO:0006915(apoptotic process);GO:0007249(I-kappaB kinase/NF-kappaB signaling);GO:0007253(cytoplasmic sequestering of NF-kappaB);GO:0008134(transcription factor binding);GO:0008139(nuclear localization sequence binding…	04024(cAMP signaling pathway);04062(Chemokine signaling pathway);04064(NF-kappa B signaling pathway);04210(Apoptosis);04380(Osteoclast differentiation);04620(Toll-like receptor signaling pathway);04621(NOD-like receptor signaling pathway);04622(RIG-I-like receptor signaling pathway);04623(Cytosolic DNA-sensing pathway);04625(C-type lectin receptor signaling pathway);04657(IL-17 signaling pathway)…	up
ENSG00000127914	AKAP9	-0.720153	1.11737e-174	4.85317e-170	0.267	0.507	A-kinase anchoring protein 9 [Source:HGNC Symbol;Acc:HGNC:379]	GO:0000086(G2/M transition of mitotic cell cycle);GO:0003677(DNA binding);GO:0005102(signaling receptor binding);GO:0005515(protein binding);GO:0005737(cytoplasm);GO:0005794(Golgi apparatus);GO:0005795(Golgi stack);GO:0005801(cis-Golgi network);GO:0005813(centrosome);GO:0005815(microtubule organizing center);GO:0005829(cytosol);GO:0005856(cytoskeleton);GO:0007020(microtubule nucleation);GO:000716…	NA	down
ENSG00000196923	PDLIM7	0.682303	1.67541e-174	7.27699e-170	0.239	0.046	PDZ and LIM domain 7 [Source:HGNC Symbol;Acc:HGNC:22958]	GO:0001503(ossification);GO:0001725(stress fiber);GO:0001726(ruffle);GO:0005515(protein binding);GO:0005634(nucleus);GO:0005737(cytoplasm);GO:0005829(cytosol);GO:0005856(cytoskeleton);GO:0005913(cell-cell adherens junction);GO:0005925(focal adhesion);GO:0006898(receptor-mediated endocytosis);GO:0007275(multicellular organism development);GO:0007411(axon guidance);GO:0015629(actin cytoskeleton);GO…	NA	up
ENSG00000004399	PLXND1	-0.709273	1.91142e-174	8.30206e-170	0.273	0.507	plexin D1 [Source:HGNC Symbol;Acc:HGNC:9107]	GO:0001525(angiogenesis);GO:0001569(branching involved in blood vessel morphogenesis);GO:0002116(semaphorin receptor complex);GO:0003151(outflow tract morphogenesis);GO:0003279(cardiac septum development);GO:0005515(protein binding);GO:0005886(plasma membrane);GO:0005887(integral component of plasma membrane);GO:0007162(negative regulation of cell adhesion);GO:0007165(signal transduction);GO:0007…	NA	down
ENSG00000063046	EIF4B	-0.659932	1.4439e-171	6.27145e-167	0.424	0.633	eukaryotic translation initiation factor 4B [Source:HGNC Symbol;Acc:HGNC:3285]	GO:0001731(formation of translation preinitiation complex);GO:0002181(cytoplasmic translation);GO:0003676(nucleic acid binding);GO:0003723(RNA binding);GO:0003743(translation initiation factor activity);GO:0005515(protein binding);GO:0005829(cytosol);GO:0005844(polysome);GO:0006412(translation);GO:0006413(translational initiation);GO:0006446(regulation of translational initiation);GO:0016281(euka…	03013(RNA transport);04150(mTOR signaling pathway);04151(PI3K-Akt signaling pathway);05205(Proteoglycans in cancer)	down
ENSG00000179271	GADD45GIP1	0.748693	2.48536e-171	1.07949e-166	0.477	0.259	GADD45G interacting protein 1 [Source:HGNC Symbol;Acc:HGNC:29996]	GO:0005515(protein binding);GO:0005634(nucleus);GO:0005739(mitochondrion);GO:0005759(mitochondrial matrix);GO:0005840(ribosome);GO:0007049(cell cycle);GO:0016032(viral process);GO:0070125(mitochondrial translational elongation);GO:0070126(mitochondrial translational termination);GO:0071850(mitotic cell cycle arrest)	NA	up
ENSG00000136830	FAM129B	0.661381	1.15263e-170	5.00632e-166	0.292	0.08	family with sequence similarity 129 member B [Source:HGNC Symbol;Acc:HGNC:25282]	GO:0003713(transcription coactivator activity);GO:0005634(nucleus);GO:0005654(nucleoplasm);GO:0005737(cytoplasm);GO:0005829(cytosol);GO:0005886(plasma membrane);GO:0005912(adherens junction);GO:0007411(axon guidance);GO:0008285(negative regulation of cell population proliferation);GO:0016020(membrane);GO:0016525(negative regulation of angiogenesis);GO:0030054(cell junction);GO:0030154(cell differ…	NA	up
ENSG00000054148	PHPT1	0.769976	1.15551e-170	5.01886e-166	0.49	0.269	phosphohistidine phosphatase 1 [Source:HGNC Symbol;Acc:HGNC:30033]	GO:0004721(phosphoprotein phosphatase activity);GO:0005515(protein binding);GO:0005737(cytoplasm);GO:0005829(cytosol);GO:0006470(protein dephosphorylation);GO:0016787(hydrolase activity);GO:0019855(calcium channel inhibitor activity);GO:0035774(positive regulation of insulin secretion involved in cellular response to glucose stimulus);GO:0035971(peptidyl-histidine dephosphorylation);GO:0044325(io…	NA	up
ENSG00000169100	SLC25A6	-0.584506	4.36045e-170	1.89392e-165	0.632	0.764	solute carrier family 25 member 6 [Source:HGNC Symbol;Acc:HGNC:10992]	GO:0005471(ATP:ADP antiporter activity);GO:0005515(protein binding);GO:0005634(nucleus);GO:0005739(mitochondrion);GO:0005743(mitochondrial inner membrane);GO:0005744(TIM23 mitochondrial import inner membrane translocase complex);GO:0006626(protein targeting to mitochondrion);GO:0006915(apoptotic process);GO:0015866(ADP transport);GO:0015867(ATP transport);GO:0016020(membrane);GO:0016021(integral …	04020(Calcium signaling pathway);04022(cGMP-PKG signaling pathway);04217(Necroptosis);04218(Cellular senescence);05012(Parkinson disease);05016(Huntington disease);05164(Influenza A);05166(Human T-cell leukemia virus 1 infection)	down
ENSG00000176597	B3GNT5	0.812999	5.78684e-170	2.51346e-165	0.411	0.177	UDP-GlcNAc:betaGal beta-1,3-N-acetylglucosaminyltransferase 5 [Source:HGNC Symbol;Acc:HGNC:15684]	GO:0000139(Golgi membrane);GO:0005783(endoplasmic reticulum);GO:0005794(Golgi apparatus);GO:0006486(protein glycosylation);GO:0007275(multicellular organism development);GO:0007417(central nervous system development);GO:0007420(brain development);GO:0008376(acetylgalactosaminyltransferase activity);GO:0008378(galactosyltransferase activity);GO:0008457(beta-galactosyl-N-acetylglucosaminylgalactosy…	00601(Glycosphingolipid biosynthesis - lacto and neolacto series)	up
ENSG00000135218	CD36	0.896084	7.51585e-170	3.26443e-165	0.494	0.241	CD36 molecule [Source:HGNC Symbol;Acc:HGNC:1663]	GO:0000122(negative regulation of transcription by RNA polymerase II);GO:0001540(amyloid-beta binding);GO:0001954(positive regulation of cell-matrix adhesion);GO:0002221(pattern recognition receptor signaling pathway);GO:0002224(toll-like receptor signaling pathway);GO:0002479(antigen processing and presentation of exogenous peptide antigen via MHC class I, TAP-dependent);GO:0002532(production of…	03320(PPAR signaling pathway);04145(Phagosome);04152(AMPK signaling pathway);04512(ECM-receptor interaction);04640(Hematopoietic cell lineage);04920(Adipocytokine signaling pathway);04931(Insulin resistance);04975(Fat digestion and absorption);04979(Cholesterol metabolism);05144(Malaria)	up
ENSG00000250461	AC122718.1	-0.58254	7.56295e-170	3.28489e-165	0.058	0.227	family with sequence similarity 133, member B (FAM133B) pseudogene	NA	NA	down
ENSG00000108179	PPIF	0.911361	1.48555e-169	6.45236e-165	0.409	0.199	peptidylprolyl isomerase F [Source:HGNC Symbol;Acc:HGNC:9259]	GO:0000413(protein peptidyl-prolyl isomerization);GO:0002931(response to ischemia);GO:0003755(peptidyl-prolyl cis-trans isomerase activity);GO:0005515(protein binding);GO:0005739(mitochondrion);GO:0005743(mitochondrial inner membrane);GO:0005753(mitochondrial proton-transporting ATP synthase complex);GO:0005757(mitochondrial permeability transition pore complex);GO:0005759(mitochondrial matrix);G…	04020(Calcium signaling pathway);04022(cGMP-PKG signaling pathway);05012(Parkinson disease);05016(Huntington disease);05145(Toxoplasmosis)	up
ENSG00000183087	GAS6	-0.567587	1.20286e-168	5.2245e-164	0.06	0.235	growth arrest specific 6 [Source:HGNC Symbol;Acc:HGNC:4168]	GO:0001764(neuron migration);GO:0001786(phosphatidylserine binding);GO:0001934(positive regulation of protein phosphorylation);GO:0001961(positive regulation of cytokine-mediated signaling pathway);GO:0002576(platelet degranulation);GO:0003104(positive regulation of glomerular filtration);GO:0005102(signaling receptor binding);GO:0005245(voltage-gated calcium channel activity);GO:0005509(calcium …	01521(EGFR tyrosine kinase inhibitor resistance)	down
ENSG00000073849	ST6GAL1	-0.479066	1.82035e-168	7.9065e-164	0.042	0.199	ST6 beta-galactoside alpha-2,6-sialyltransferase 1 [Source:HGNC Symbol;Acc:HGNC:10860]	GO:0000139(Golgi membrane);GO:0003835(beta-galactoside alpha-2,6-sialyltransferase activity);GO:0005515(protein binding);GO:0005576(extracellular region);GO:0005794(Golgi apparatus);GO:0006054(N-acetylneuraminate metabolic process);GO:0006486(protein glycosylation);GO:0006959(humoral immune response);GO:0008373(sialyltransferase activity);GO:0016020(membrane);GO:0016021(integral component of memb…	00510(N-Glycan biosynthesis);00514(Other types of O-glycan biosynthesis)	down
ENSG00000267519	AC020916.1	-0.750732	2.62711e-168	1.14106e-163	0.555	0.719	novel transcript	NA	NA	down
ENSG00000239672	NME1	0.73038	3.15951e-168	1.3723e-163	0.303	0.098	NME/NM23 nucleoside diphosphate kinase 1 [Source:HGNC Symbol;Acc:HGNC:7849]	GO:0000166(nucleotide binding);GO:0000287(magnesium ion binding);GO:0000977(RNA polymerase II regulatory region sequence-specific DNA binding);GO:0002762(negative regulation of myeloid leukocyte differentiation);GO:0003697(single-stranded DNA binding);GO:0003723(RNA binding);GO:0004536(deoxyribonuclease activity);GO:0004550(nucleoside diphosphate kinase activity);GO:0005515(protein binding);GO:00…	00230(Purine metabolism);00240(Pyrimidine metabolism);00983(Drug metabolism - other enzymes)	up
ENSG00000106803	SEC61B	0.669858	3.19094e-168	1.38595e-163	0.651	0.467	Sec61 translocon beta subunit [Source:HGNC Symbol;Acc:HGNC:16993]	GO:0003723(RNA binding);GO:0005086(ARF guanyl-nucleotide exchange factor activity);GO:0005515(protein binding);GO:0005783(endoplasmic reticulum);GO:0005784(Sec61 translocon complex);GO:0005789(endoplasmic reticulum membrane);GO:0005829(cytosol);GO:0006616(SRP-dependent cotranslational protein targeting to membrane, translocation);GO:0006886(intracellular protein transport);GO:0015031(protein tran…	03060(Protein export);04141(Protein processing in endoplasmic reticulum);04145(Phagosome);05110(Vibrio cholerae infection)	up
ENSG00000104408	EIF3E	-0.649588	5.75949e-168	2.50158e-163	0.386	0.585	eukaryotic translation initiation factor 3 subunit E [Source:HGNC Symbol;Acc:HGNC:3277]	GO:0000184(nuclear-transcribed mRNA catabolic process, nonsense-mediated decay);GO:0000785(chromatin);GO:0001732(formation of cytoplasmic translation initiation complex);GO:0002183(cytoplasmic translational initiation);GO:0003723(RNA binding);GO:0003743(translation initiation factor activity);GO:0005515(protein binding);GO:0005634(nucleus);GO:0005654(nucleoplasm);GO:0005737(cytoplasm);GO:0005829(…	03013(RNA transport);05160(Hepatitis C)	down
ENSG00000198786	MT-ND5	0.586533	1.33823e-166	5.81249e-162	0.963	0.916	mitochondrially encoded NADH:ubiquinone oxidoreductase core subunit 5 [Source:HGNC Symbol;Acc:HGNC:7461]	GO:0001666(response to hypoxia);GO:0003954(NADH dehydrogenase activity);GO:0005739(mitochondrion);GO:0005743(mitochondrial inner membrane);GO:0005747(mitochondrial respiratory chain complex I);GO:0006120(mitochondrial electron transport, NADH to ubiquinone);GO:0008137(NADH dehydrogenase (ubiquinone) activity);GO:0010243(response to organonitrogen compound);GO:0016020(membrane);GO:0016021(integral…	00190(Oxidative phosphorylation);04714(Thermogenesis);04723(Retrograde endocannabinoid signaling);05012(Parkinson disease)	up
ENSG00000164111	ANXA5	0.512634	1.97862e-166	8.59393e-162	0.856	0.816	annexin A5 [Source:HGNC Symbol;Acc:HGNC:543]	GO:0002576(platelet degranulation);GO:0004859(phospholipase inhibitor activity);GO:0005388(calcium-transporting ATPase activity);GO:0005509(calcium ion binding);GO:0005515(protein binding);GO:0005543(phospholipid binding);GO:0005544(calcium-dependent phospholipid binding);GO:0005576(extracellular region);GO:0005622(intracellular);GO:0005737(cytoplasm);GO:0005829(cytosol);GO:0005925(focal adhesion…	NA	up
ENSG00000138061	CYP1B1	1.12597	5.85069e-166	2.54119e-161	0.395	0.199	cytochrome P450 family 1 subfamily B member 1 [Source:HGNC Symbol;Acc:HGNC:2597]	GO:0001525(angiogenesis);GO:0002930(trabecular meshwork development);GO:0004497(monooxygenase activity);GO:0005506(iron ion binding);GO:0005739(mitochondrion);GO:0005783(endoplasmic reticulum);GO:0005789(endoplasmic reticulum membrane);GO:0006725(cellular aromatic compound metabolic process);GO:0006805(xenobiotic metabolic process);GO:0006809(nitric oxide biosynthetic process);GO:0007155(cell adh…	00140(Steroid hormone biosynthesis);00380(Tryptophan metabolism);00980(Metabolism of xenobiotics by cytochrome P450);04913(Ovarian steroidogenesis);05204(Chemical carcinogenesis);05206(MicroRNAs in cancer)	up
ENSG00000186468	RPS23	-0.50535	1.97368e-165	8.57246e-161	0.908	0.96	ribosomal protein S23 [Source:HGNC Symbol;Acc:HGNC:10410]	GO:0000184(nuclear-transcribed mRNA catabolic process, nonsense-mediated decay);GO:0002181(cytoplasmic translation);GO:0003723(RNA binding);GO:0003735(structural constituent of ribosome);GO:0005515(protein binding);GO:0005654(nucleoplasm);GO:0005737(cytoplasm);GO:0005783(endoplasmic reticulum);GO:0005791(rough endoplasmic reticulum);GO:0005829(cytosol);GO:0005840(ribosome);GO:0006412(translation)…	03010(Ribosome)	down
ENSG00000248527	MTATP6P1	0.679112	2.90356e-165	1.26113e-160	0.806	0.727	MT-ATP6 pseudogene 1 [Source:HGNC Symbol;Acc:HGNC:44575]	NA	NA	up
ENSG00000166278	C2	-0.69941	3.24471e-165	1.40931e-160	0.069	0.242	complement C2 [Source:HGNC Symbol;Acc:HGNC:1248]	GO:0002376(immune system process);GO:0004252(serine-type endopeptidase activity);GO:0005515(protein binding);GO:0005576(extracellular region);GO:0005615(extracellular space);GO:0006508(proteolysis);GO:0006956(complement activation);GO:0006958(complement activation, classical pathway);GO:0007584(response to nutrient);GO:0008233(peptidase activity);GO:0008236(serine-type peptidase activity);GO:0016…	04610(Complement and coagulation cascades);05133(Pertussis);05150(Staphylococcus aureus infection);05322(Systemic lupus erythematosus)	down
ENSG00000156482	RPL30	-0.521722	1.20953e-164	5.25348e-160	0.905	0.965	ribosomal protein L30 [Source:HGNC Symbol;Acc:HGNC:10333]	GO:0000184(nuclear-transcribed mRNA catabolic process, nonsense-mediated decay);GO:0002181(cytoplasmic translation);GO:0003723(RNA binding);GO:0003735(structural constituent of ribosome);GO:0005515(protein binding);GO:0005622(intracellular);GO:0005634(nucleus);GO:0005829(cytosol);GO:0005840(ribosome);GO:0005925(focal adhesion);GO:0006412(translation);GO:0006413(translational initiation);GO:000661…	03010(Ribosome)	down
ENSG00000174695	TMEM167A	0.725721	1.44404e-164	6.27204e-160	0.495	0.29	transmembrane protein 167A [Source:HGNC Symbol;Acc:HGNC:28330]	GO:0000139(Golgi membrane);GO:0005794(Golgi apparatus);GO:0009306(protein secretion);GO:0016020(membrane);GO:0016021(integral component of membrane);GO:0046907(intracellular transport)	NA	up
ENSG00000196141	SPATS2L	-0.670473	2.90898e-164	1.26349e-159	0.119	0.301	spermatogenesis associated serine rich 2 like [Source:HGNC Symbol;Acc:HGNC:24574]	GO:0003723(RNA binding);GO:0005515(protein binding);GO:0005634(nucleus);GO:0005730(nucleolus);GO:0005737(cytoplasm);GO:0005829(cytosol);GO:0032991(protein-containing complex)	NA	down
ENSG00000153234	NR4A2	-0.703448	3.35187e-163	1.45585e-158	0.628	0.747	nuclear receptor subfamily 4 group A member 2 [Source:HGNC Symbol;Acc:HGNC:7981]	GO:0000122(negative regulation of transcription by RNA polymerase II);GO:0000977(RNA polymerase II regulatory region sequence-specific DNA binding);GO:0000978(RNA polymerase II proximal promoter sequence-specific DNA binding);GO:0000981(DNA-binding transcription factor activity, RNA polymerase II-specific);GO:0001228(DNA-binding transcription activator activity, RNA polymerase II-specific);GO:000…	04925(Aldosterone synthesis and secretion);04928(Parathyroid hormone synthesis, secretion and action)	down
ENSG00000173193	PARP14	-0.653247	2.46867e-162	1.07224e-157	0.218	0.445	poly(ADP-ribose) polymerase family member 14 [Source:HGNC Symbol;Acc:HGNC:29232]	GO:0002376(immune system process);GO:0003950(NAD+ ADP-ribosyltransferase activity);GO:0005515(protein binding);GO:0005634(nucleus);GO:0005737(cytoplasm);GO:0005829(cytosol);GO:0006471(protein ADP-ribosylation);GO:0010629(negative regulation of gene expression);GO:0016020(membrane);GO:0016740(transferase activity);GO:0016757(transferase activity, transferring glycosyl groups);GO:0019899(enzyme bin…	NA	down
ENSG00000165029	ABCA1	-0.713183	3.51962e-162	1.52871e-157	0.355	0.58	ATP binding cassette subfamily A member 1 [Source:HGNC Symbol;Acc:HGNC:29]	GO:0000166(nucleotide binding);GO:0002790(peptide secretion);GO:0005102(signaling receptor binding);GO:0005319(lipid transporter activity);GO:0005515(protein binding);GO:0005524(ATP binding);GO:0005543(phospholipid binding);GO:0005548(phospholipid transporter activity);GO:0005789(endoplasmic reticulum membrane);GO:0005794(Golgi apparatus);GO:0005886(plasma membrane);GO:0005887(integral component …	02010(ABC transporters);04975(Fat digestion and absorption);04979(Cholesterol metabolism)	down
ENSG00000160213	CSTB	0.762187	6.68722e-162	2.90453e-157	0.725	0.637	cystatin B [Source:HGNC Symbol;Acc:HGNC:2482]	GO:0002020(protease binding);GO:0003723(RNA binding);GO:0004866(endopeptidase inhibitor activity);GO:0004869(cysteine-type endopeptidase inhibitor activity);GO:0005576(extracellular region);GO:0005615(extracellular space);GO:0005622(intracellular);GO:0005634(nucleus);GO:0005730(nucleolus);GO:0005737(cytoplasm);GO:0005829(cytosol);GO:0008344(adult locomotory behavior);GO:0010466(negative regulatio…	NA	up
ENSG00000157551	KCNJ15	0.448193	9.20512e-162	3.99815e-157	0.126	0.001	potassium voltage-gated channel subfamily J member 15 [Source:HGNC Symbol;Acc:HGNC:6261]	GO:0005242(inward rectifier potassium channel activity);GO:0005244(voltage-gated ion channel activity);GO:0005515(protein binding);GO:0005886(plasma membrane);GO:0005887(integral component of plasma membrane);GO:0006811(ion transport);GO:0006813(potassium ion transport);GO:0016020(membrane);GO:0016021(integral component of membrane);GO:0034220(ion transmembrane transport);GO:0034765(regulation of…	04971(Gastric acid secretion)	up
ENSG00000165140	FBP1	0.944649	3.82681e-161	1.66214e-156	0.351	0.159	fructose-bisphosphatase 1 [Source:HGNC Symbol;Acc:HGNC:3606]	GO:0000122(negative regulation of transcription by RNA polymerase II);GO:0001085(RNA polymerase II transcription factor binding);GO:0003824(catalytic activity);GO:0005515(protein binding);GO:0005634(nucleus);GO:0005737(cytoplasm);GO:0005829(cytosol);GO:0005975(carbohydrate metabolic process);GO:0005986(sucrose biosynthetic process);GO:0006000(fructose metabolic process);GO:0006002(fructose 6-phos…	00010(Glycolysis / Gluconeogenesis);00030(Pentose phosphate pathway);00051(Fructose and mannose metabolism);04152(AMPK signaling pathway);04910(Insulin signaling pathway);04922(Glucagon signaling pathway)	up
ENSG00000125912	NCLN	0.62536	1.14876e-160	4.98952e-156	0.249	0.059	nicalin [Source:HGNC Symbol;Acc:HGNC:26923]	GO:0005515(protein binding);GO:0005783(endoplasmic reticulum);GO:0005789(endoplasmic reticulum membrane);GO:0009966(regulation of signal transduction);GO:0016020(membrane);GO:0016021(integral component of membrane);GO:0032991(protein-containing complex);GO:0043254(regulation of protein complex assembly);GO:0050821(protein stabilization);GO:0061635(regulation of protein complex stability)	NA	up
ENSG00000146192	FGD2	-0.51987	2.255e-160	9.79438e-156	0.082	0.268	FYVE, RhoGEF and PH domain containing 2 [Source:HGNC Symbol;Acc:HGNC:3664]	GO:0001726(ruffle);GO:0005085(guanyl-nucleotide exchange factor activity);GO:0005089(Rho guanyl-nucleotide exchange factor activity);GO:0005515(protein binding);GO:0005634(nucleus);GO:0005737(cytoplasm);GO:0005768(endosome);GO:0005769(early endosome);GO:0005794(Golgi apparatus);GO:0005829(cytosol);GO:0005856(cytoskeleton);GO:0005886(plasma membrane);GO:0007010(cytoskeleton organization);GO:000718…	NA	down
ENSG00000111912	NCOA7	-0.519878	1.57831e-159	6.85522e-155	0.069	0.243	nuclear receptor coactivator 7 [Source:HGNC Symbol;Acc:HGNC:21081]	GO:0005515(protein binding);GO:0005622(intracellular);GO:0005634(nucleus);GO:0030374(nuclear receptor transcription coactivator activity);GO:0035257(nuclear hormone receptor binding);GO:0045944(positive regulation of transcription by RNA polymerase II);GO:1900408(negative regulation of cellular response to oxidative stress);GO:1902083(negative regulation of peptidyl-cysteine S-nitrosylation);GO:1…	NA	down
ENSG00000141447	OSBPL1A	-0.56061	2.89708e-159	1.25832e-154	0.069	0.241	oxysterol binding protein like 1A [Source:HGNC Symbol;Acc:HGNC:16398]	GO:0005515(protein binding);GO:0005543(phospholipid binding);GO:0005768(endosome);GO:0005770(late endosome);GO:0005829(cytosol);GO:0006699(bile acid biosynthetic process);GO:0006869(lipid transport);GO:0008203(cholesterol metabolic process);GO:0008289(lipid binding);GO:0015248(sterol transporter activity);GO:0015485(cholesterol binding);GO:0015918(sterol transport);GO:0016020(membrane);GO:0016192…	NA	down
ENSG00000181381	DDX60L	0.755192	3.30845e-159	1.43699e-154	0.397	0.185	DExD/H-box 60 like [Source:HGNC Symbol;Acc:HGNC:26429]	GO:0000166(nucleotide binding);GO:0003676(nucleic acid binding);GO:0003723(RNA binding);GO:0004386(helicase activity);GO:0005524(ATP binding);GO:0016787(hydrolase activity)	NA	up
ENSG00000111669	TPI1	0.645813	1.49486e-158	6.49278e-154	0.725	0.624	triosephosphate isomerase 1 [Source:HGNC Symbol;Acc:HGNC:12009]	GO:0003824(catalytic activity);GO:0004807(triose-phosphate isomerase activity);GO:0005515(protein binding);GO:0005615(extracellular space);GO:0005634(nucleus);GO:0005737(cytoplasm);GO:0005829(cytosol);GO:0006006(glucose metabolic process);GO:0006094(gluconeogenesis);GO:0006096(glycolytic process);GO:0007275(multicellular organism development);GO:0008929(methylglyoxal synthase activity);GO:0016829…	00010(Glycolysis / Gluconeogenesis);00051(Fructose and mannose metabolism);00562(Inositol phosphate metabolism)	up
ENSG00000115541	HSPE1	-0.65119	1.63193e-158	7.08813e-154	0.513	0.715	heat shock protein family E (Hsp10) member 1 [Source:HGNC Symbol;Acc:HGNC:5269]	GO:0001649(osteoblast differentiation);GO:0003723(RNA binding);GO:0005515(protein binding);GO:0005524(ATP binding);GO:0005737(cytoplasm);GO:0005739(mitochondrion);GO:0005759(mitochondrial matrix);GO:0006457(protein folding);GO:0006919(activation of cysteine-type endopeptidase activity involved in apoptotic process);GO:0006986(response to unfolded protein);GO:0016020(membrane);GO:0046872(metal ion…	NA	down
ENSG00000128228	SDF2L1	0.810358	3.17401e-158	1.3786e-153	0.394	0.171	stromal cell derived factor 2 like 1 [Source:HGNC Symbol;Acc:HGNC:10676]	GO:0005783(endoplasmic reticulum);GO:0005788(endoplasmic reticulum lumen);GO:0016020(membrane);GO:0034663(endoplasmic reticulum chaperone complex);GO:0034976(response to endoplasmic reticulum stress);GO:0042981(regulation of apoptotic process);GO:0051087(chaperone binding);GO:0051117(ATPase binding);GO:0051787(misfolded protein binding);GO:0071218(cellular response to misfolded protein);GO:007171…	NA	up
ENSG00000085265	FCN1	1.07816	6.37961e-158	2.77092e-153	0.402	0.192	ficolin 1 [Source:HGNC Symbol;Acc:HGNC:3623]	GO:0001664(G protein-coupled receptor binding);GO:0001867(complement activation, lectin pathway);GO:0002376(immune system process);GO:0002752(cell surface pattern recognition receptor signaling pathway);GO:0005515(protein binding);GO:0005576(extracellular region);GO:0005581(collagen trimer);GO:0005886(plasma membrane);GO:0006956(complement activation);GO:0007186(G protein-coupled receptor signali…	NA	up
ENSG00000105373	NOP53	-0.633746	1.71735e-157	7.45914e-153	0.32	0.542	NOP53 ribosome biogenesis factor [Source:HGNC Symbol;Acc:HGNC:4333]	GO:0000027(ribosomal large subunit assembly);GO:0000122(negative regulation of transcription by RNA polymerase II);GO:0001650(fibrillar center);GO:0001932(regulation of protein phosphorylation);GO:0002039(p53 binding);GO:0003723(RNA binding);GO:0005515(protein binding);GO:0005634(nucleus);GO:0005654(nucleoplasm);GO:0005730(nucleolus);GO:0005829(cytosol);GO:0006281(DNA repair);GO:0006364(rRNA proc…	NA	down
ENSG00000099797	TECR	-0.631488	1.82651e-157	7.93328e-153	0.143	0.343	trans-2,3-enoyl-CoA reductase [Source:HGNC Symbol;Acc:HGNC:4551]	GO:0005515(protein binding);GO:0005634(nucleus);GO:0005783(endoplasmic reticulum);GO:0005789(endoplasmic reticulum membrane);GO:0006629(lipid metabolic process);GO:0006631(fatty acid metabolic process);GO:0006633(fatty acid biosynthetic process);GO:0016020(membrane);GO:0016021(integral component of membrane);GO:0016491(oxidoreductase activity);GO:0016627(oxidoreductase activity, acting on the CH-…	00062(Fatty acid elongation);01040(Biosynthesis of unsaturated fatty acids)	down
ENSG00000110321	EIF4G2	0.557994	1.84192e-157	8.00018e-153	0.755	0.652	eukaryotic translation initiation factor 4 gamma 2 [Source:HGNC Symbol;Acc:HGNC:3297]	GO:0003723(RNA binding);GO:0003729(mRNA binding);GO:0003743(translation initiation factor activity);GO:0005515(protein binding);GO:0005829(cytosol);GO:0005913(cell-cell adherens junction);GO:0006412(translation);GO:0006413(translational initiation);GO:0006417(regulation of translation);GO:0006446(regulation of translational initiation);GO:0007050(cell cycle arrest);GO:0007507(heart development);G…	03013(RNA transport);05416(Viral myocarditis)	up
ENSG00000146278	PNRC1	-0.551308	2.11913e-157	9.20423e-153	0.741	0.875	proline rich nuclear receptor coactivator 1 [Source:HGNC Symbol;Acc:HGNC:17278]	GO:0005515(protein binding);GO:0005634(nucleus)	NA	down
ENSG00000144713	RPL32	-0.45957	3.21491e-157	1.39636e-152	0.947	0.976	ribosomal protein L32 [Source:HGNC Symbol;Acc:HGNC:10336]	GO:0000184(nuclear-transcribed mRNA catabolic process, nonsense-mediated decay);GO:0002181(cytoplasmic translation);GO:0003723(RNA binding);GO:0003735(structural constituent of ribosome);GO:0005622(intracellular);GO:0005829(cytosol);GO:0005840(ribosome);GO:0006412(translation);GO:0006413(translational initiation);GO:0006614(SRP-dependent cotranslational protein targeting to membrane);GO:0016020(m…	03010(Ribosome)	down
ENSG00000111252	SH2B3	-0.627253	3.40449e-157	1.47871e-152	0.193	0.414	SH2B adaptor protein 3 [Source:HGNC Symbol;Acc:HGNC:29605]	GO:0001780(neutrophil homeostasis);GO:0005068(transmembrane receptor protein tyrosine kinase adaptor activity);GO:0005070(SH3/SH2 adaptor activity);GO:0005173(stem cell factor receptor binding);GO:0005515(protein binding);GO:0005829(cytosol);GO:0005886(plasma membrane);GO:0007165(signal transduction);GO:0007169(transmembrane receptor protein tyrosine kinase signaling pathway);GO:0007596(blood coa…	04722(Neurotrophin signaling pathway)	down
ENSG00000102786	INTS6	-0.742104	5.49495e-156	2.38668e-151	0.469	0.655	integrator complex subunit 6 [Source:HGNC Symbol;Acc:HGNC:14879]	GO:0004888(transmembrane signaling receptor activity);GO:0005515(protein binding);GO:0005634(nucleus);GO:0005654(nucleoplasm);GO:0015629(actin cytoskeleton);GO:0016180(snRNA processing);GO:0032039(integrator complex);GO:0034472(snRNA 3'-end processing);GO:0042795(snRNA transcription by RNA polymerase II)	NA	down
ENSG00000151929	BAG3	-0.748005	1.84818e-155	8.02739e-151	0.23	0.441	BCL2 associated athanogene 3 [Source:HGNC Symbol;Acc:HGNC:939]	GO:0000045(autophagosome assembly);GO:0000774(adenyl-nucleotide exchange factor activity);GO:0001725(stress fiber);GO:0005515(protein binding);GO:0005634(nucleus);GO:0005737(cytoplasm);GO:0005829(cytosol);GO:0005886(plasma membrane);GO:0006457(protein folding);GO:0006915(apoptotic process);GO:0007420(brain development);GO:0008565(protein transporter activity);GO:0008625(extrinsic apoptotic signal…	NA	down
ENSG00000135905	DOCK10	0.73953	4.41412e-155	1.91723e-150	0.375	0.176	dedicator of cytokinesis 10 [Source:HGNC Symbol;Acc:HGNC:23479]	GO:0001782(B cell homeostasis);GO:0002315(marginal zone B cell differentiation);GO:0003674(molecular_function);GO:0005085(guanyl-nucleotide exchange factor activity);GO:0005634(nucleus);GO:0005654(nucleoplasm);GO:0005737(cytoplasm);GO:0005829(cytosol);GO:0007264(small GTPase mediated signal transduction);GO:0016020(membrane);GO:0030334(regulation of cell migration);GO:0042995(cell projection);GO:…	NA	up
ENSG00000145425	RPS3A	-0.494012	5.21091e-155	2.26331e-150	0.851	0.932	ribosomal protein S3A [Source:HGNC Symbol;Acc:HGNC:10421]	GO:0000184(nuclear-transcribed mRNA catabolic process, nonsense-mediated decay);GO:0003723(RNA binding);GO:0003735(structural constituent of ribosome);GO:0005515(protein binding);GO:0005622(intracellular);GO:0005634(nucleus);GO:0005654(nucleoplasm);GO:0005730(nucleolus);GO:0005737(cytoplasm);GO:0005783(endoplasmic reticulum);GO:0005829(cytosol);GO:0005840(ribosome);GO:0005925(focal adhesion);GO:0…	03010(Ribosome)	down
ENSG00000053254	FOXN3	-0.628834	5.65803e-155	2.45751e-150	0.215	0.442	forkhead box N3 [Source:HGNC Symbol;Acc:HGNC:1928]	GO:0000981(DNA-binding transcription factor activity, RNA polymerase II-specific);GO:0003677(DNA binding);GO:0003700(DNA-binding transcription factor activity);GO:0005515(protein binding);GO:0005634(nucleus);GO:0006355(regulation of transcription, DNA-templated);GO:0006357(regulation of transcription by RNA polymerase II);GO:0007049(cell cycle);GO:0007095(mitotic G2 DNA damage checkpoint);GO:0008…	NA	down
ENSG00000078043	PIAS2	-0.620938	1.73433e-154	7.53289e-150	0.095	0.277	protein inhibitor of activated STAT 2 [Source:HGNC Symbol;Acc:HGNC:17311]	GO:0003677(DNA binding);GO:0003713(transcription coactivator activity);GO:0005515(protein binding);GO:0005634(nucleus);GO:0005654(nucleoplasm);GO:0008134(transcription factor binding);GO:0008270(zinc ion binding);GO:0016605(PML body);GO:0016607(nuclear speck);GO:0016740(transferase activity);GO:0016925(protein sumoylation);GO:0019789(SUMO transferase activity);GO:0030521(androgen receptor signali…	04120(Ubiquitin mediated proteolysis);04630(Jak-STAT signaling pathway)	down
ENSG00000082212	ME2	0.761478	5.18834e-153	2.2535e-148	0.472	0.321	malic enzyme 2 [Source:HGNC Symbol;Acc:HGNC:6984]	GO:0003824(catalytic activity);GO:0004470(malic enzyme activity);GO:0004471(malate dehydrogenase (decarboxylating) (NAD+) activity);GO:0004473(malate dehydrogenase (decarboxylating) (NADP+) activity);GO:0005739(mitochondrion);GO:0005759(mitochondrial matrix);GO:0006090(pyruvate metabolic process);GO:0006099(tricarboxylic acid cycle);GO:0006108(malate metabolic process);GO:0008152(metabolic proces…	00620(Pyruvate metabolism)	up
ENSG00000088854	C20orf194	-0.545513	7.75653e-153	3.36897e-148	0.09	0.272	chromosome 20 open reading frame 194 [Source:HGNC Symbol;Acc:HGNC:17721]	GO:0005515(protein binding);GO:0005575(cellular_component);GO:0008150(biological_process)	NA	down
ENSG00000108256	NUFIP2	-0.63847	1.15143e-152	5.00112e-148	0.45	0.658	nuclear FMR1 interacting protein 2 [Source:HGNC Symbol;Acc:HGNC:17634]	GO:0003723(RNA binding);GO:0005515(protein binding);GO:0005634(nucleus);GO:0005654(nucleoplasm);GO:0005737(cytoplasm);GO:0005829(cytosol);GO:0010494(cytoplasmic stress granule);GO:0016020(membrane);GO:0016604(nuclear body);GO:0042788(polysomal ribosome)	NA	down
ENSG00000117616	RSRP1	-0.641013	2.55055e-152	1.10781e-147	0.405	0.628	arginine and serine rich protein 1 [Source:HGNC Symbol;Acc:HGNC:25234]	GO:0005515(protein binding)	NA	down
ENSG00000109861	CTSC	-0.641673	5.44387e-151	2.36449e-146	0.495	0.696	cathepsin C [Source:HGNC Symbol;Acc:HGNC:2528]	GO:0000139(Golgi membrane);GO:0001913(T cell mediated cytotoxicity);GO:0004197(cysteine-type endopeptidase activity);GO:0004252(serine-type endopeptidase activity);GO:0005515(protein binding);GO:0005576(extracellular region);GO:0005615(extracellular space);GO:0005654(nucleoplasm);GO:0005737(cytoplasm);GO:0005764(lysosome);GO:0005783(endoplasmic reticulum);GO:0005788(endoplasmic reticulum lumen);G…	04142(Lysosome);04210(Apoptosis)	down
ENSG00000109046	WSB1	-0.566355	1.0309e-150	4.47759e-146	0.664	0.811	WD repeat and SOCS box containing 1 [Source:HGNC Symbol;Acc:HGNC:19221]	GO:0000209(protein polyubiquitination);GO:0005515(protein binding);GO:0005622(intracellular);GO:0005829(cytosol);GO:0008150(biological_process);GO:0016567(protein ubiquitination);GO:0035556(intracellular signal transduction);GO:0043687(post-translational protein modification)	NA	down
ENSG00000125835	SNRPB	0.665502	2.62304e-150	1.13929e-145	0.5	0.288	small nuclear ribonucleoprotein polypeptides B and B1 [Source:HGNC Symbol;Acc:HGNC:11153]	GO:0000387(spliceosomal snRNP assembly);GO:0000398(mRNA splicing, via spliceosome);GO:0003723(RNA binding);GO:0005515(protein binding);GO:0005634(nucleus);GO:0005654(nucleoplasm);GO:0005681(spliceosomal complex);GO:0005682(U5 snRNP);GO:0005683(U7 snRNP);GO:0005685(U1 snRNP);GO:0005686(U2 snRNP);GO:0005687(U4 snRNP);GO:0005689(U12-type spliceosomal complex);GO:0005697(telomerase holoenzyme complex…	03040(Spliceosome);05322(Systemic lupus erythematosus)	up
ENSG00000122025	FLT3	-0.370757	1.02752e-149	4.46293e-145	0.017	0.13	fms related tyrosine kinase 3 [Source:HGNC Symbol;Acc:HGNC:3765]	GO:0000165(MAPK cascade);GO:0000166(nucleotide binding);GO:0001776(leukocyte homeostasis);GO:0002244(hematopoietic progenitor cell differentiation);GO:0002318(myeloid progenitor cell differentiation);GO:0002328(pro-B cell differentiation);GO:0002521(leukocyte differentiation);GO:0004672(protein kinase activity);GO:0004713(protein tyrosine kinase activity);GO:0004714(transmembrane receptor protein…	04010(MAPK signaling pathway);04014(Ras signaling pathway);04151(PI3K-Akt signaling pathway);04640(Hematopoietic cell lineage);05200(Pathways in cancer);05202(Transcriptional misregulation in cancer);05221(Acute myeloid leukemia);05230(Central carbon metabolism in cancer)	down
ENSG00000164463	CREBRF	-0.669931	1.46761e-149	6.37442e-145	0.226	0.45	CREB3 regulatory factor [Source:HGNC Symbol;Acc:HGNC:24050]	GO:0000977(RNA polymerase II regulatory region sequence-specific DNA binding);GO:0000981(DNA-binding transcription factor activity, RNA polymerase II-specific);GO:0001228(DNA-binding transcription activator activity, RNA polymerase II-specific);GO:0003700(DNA-binding transcription factor activity);GO:0005515(protein binding);GO:0005634(nucleus);GO:0005654(nucleoplasm);GO:0006355(regulation of tra…	NA	down
ENSG00000161638	ITGA5	0.705917	4.41177e-149	1.91621e-144	0.386	0.169	integrin subunit alpha 5 [Source:HGNC Symbol;Acc:HGNC:6141]	GO:0001525(angiogenesis);GO:0001618(virus receptor activity);GO:0001726(ruffle);GO:0005154(epidermal growth factor receptor binding);GO:0005161(platelet-derived growth factor receptor binding);GO:0005178(integrin binding);GO:0005515(protein binding);GO:0005737(cytoplasm);GO:0005783(endoplasmic reticulum);GO:0005794(Golgi apparatus);GO:0005886(plasma membrane);GO:0005911(cell-cell junction);GO:000…	04145(Phagosome);04151(PI3K-Akt signaling pathway);04510(Focal adhesion);04512(ECM-receptor interaction);04640(Hematopoietic cell lineage);04810(Regulation of actin cytoskeleton);05100(Bacterial invasion of epithelial cells);05131(Shigellosis);05133(Pertussis);05165(Human papillomavirus infection);05168(Herpes simplex virus 1 infection);05205(Proteoglycans in cancer);05206(MicroRNAs in cancer);05…	up
ENSG00000184060	ADAP2	-0.640409	9.7224e-149	4.22283e-144	0.448	0.648	ArfGAP with dual PH domains 2 [Source:HGNC Symbol;Acc:HGNC:16487]	GO:0005096(GTPase activator activity);GO:0005515(protein binding);GO:0005546(phosphatidylinositol-4,5-bisphosphate binding);GO:0005547(phosphatidylinositol-3,4,5-trisphosphate binding);GO:0005737(cytoplasm);GO:0005740(mitochondrial envelope);GO:0005886(plasma membrane);GO:0007507(heart development);GO:0016020(membrane);GO:0030674(protein binding, bridging);GO:0043325(phosphatidylinositol-3,4-bisp…	NA	down
ENSG00000007944	MYLIP	-0.622515	1.071e-148	4.65177e-144	0.194	0.414	myosin regulatory light chain interacting protein [Source:HGNC Symbol;Acc:HGNC:21155]	GO:0000209(protein polyubiquitination);GO:0004842(ubiquitin-protein transferase activity);GO:0005515(protein binding);GO:0005737(cytoplasm);GO:0005829(cytosol);GO:0005856(cytoskeleton);GO:0005886(plasma membrane);GO:0006511(ubiquitin-dependent protein catabolic process);GO:0007399(nervous system development);GO:0008092(cytoskeletal protein binding);GO:0010977(negative regulation of neuron project…	04979(Cholesterol metabolism)	down
ENSG00000187514	PTMA	0.436346	1.70767e-148	7.41711e-144	0.988	0.983	prothymosin alpha [Source:HGNC Symbol;Acc:HGNC:9623]	GO:0005515(protein binding);GO:0005634(nucleus);GO:0005654(nucleoplasm);GO:0005829(cytosol);GO:0006351(transcription, DNA-templated);GO:0033613(activating transcription factor binding);GO:0042393(histone binding);GO:0043066(negative regulation of apoptotic process);GO:0043486(histone exchange)	NA	up
ENSG00000152767	FARP1	-0.443059	4.39216e-148	1.90769e-143	0.026	0.149	FERM, ARH/RhoGEF and pleckstrin domain protein 1 [Source:HGNC Symbol;Acc:HGNC:3591]	GO:0005085(guanyl-nucleotide exchange factor activity);GO:0005089(Rho guanyl-nucleotide exchange factor activity);GO:0005737(cytoplasm);GO:0005829(cytosol);GO:0005856(cytoskeleton);GO:0005886(plasma membrane);GO:0007275(multicellular organism development);GO:0007416(synapse assembly);GO:0008092(cytoskeletal protein binding);GO:0010923(negative regulation of phosphatase activity);GO:0016020(membra…	NA	down
ENSG00000162616	DNAJB4	-0.639882	9.33997e-148	4.05672e-143	0.169	0.374	DnaJ heat shock protein family (Hsp40) member B4 [Source:HGNC Symbol;Acc:HGNC:14886]	GO:0000122(negative regulation of transcription by RNA polymerase II);GO:0001671(ATPase activator activity);GO:0005515(protein binding);GO:0005654(nucleoplasm);GO:0005737(cytoplasm);GO:0005829(cytosol);GO:0005886(plasma membrane);GO:0006457(protein folding);GO:0006986(response to unfolded protein);GO:0009408(response to heat);GO:0016020(membrane);GO:0032781(positive regulation of ATPase activity)…	NA	down
ENSG00000125740	FOSB	-0.612715	1.18022e-147	5.12616e-143	0.777	0.872	FosB proto-oncogene, AP-1 transcription factor subunit [Source:HGNC Symbol;Acc:HGNC:3797]	GO:0000122(negative regulation of transcription by RNA polymerase II);GO:0000978(RNA polymerase II proximal promoter sequence-specific DNA binding);GO:0000981(DNA-binding transcription factor activity, RNA polymerase II-specific);GO:0001228(DNA-binding transcription activator activity, RNA polymerase II-specific);GO:0003677(DNA binding);GO:0003690(double-stranded DNA binding);GO:0003700(DNA-bindi…	04380(Osteoclast differentiation);04657(IL-17 signaling pathway);05030(Cocaine addiction);05031(Amphetamine addiction);05034(Alcoholism)	down
ENSG00000120875	DUSP4	0.733957	1.64253e-147	7.13415e-143	0.179	0.024	dual specificity phosphatase 4 [Source:HGNC Symbol;Acc:HGNC:3070]	GO:0000188(inactivation of MAPK activity);GO:0004721(phosphoprotein phosphatase activity);GO:0004725(protein tyrosine phosphatase activity);GO:0005515(protein binding);GO:0005634(nucleus);GO:0005654(nucleoplasm);GO:0005737(cytoplasm);GO:0006470(protein dephosphorylation);GO:0008138(protein tyrosine/serine/threonine phosphatase activity);GO:0008330(protein tyrosine/threonine phosphatase activity);…	04010(MAPK signaling pathway)	up
ENSG00000133574	GIMAP4	-0.556794	1.71952e-147	7.46855e-143	0.134	0.337	GTPase, IMAP family member 4 [Source:HGNC Symbol;Acc:HGNC:21872]	GO:0000166(nucleotide binding);GO:0005525(GTP binding);GO:0005737(cytoplasm);GO:0005829(cytosol)	NA	down
ENSG00000171314	PGAM1	0.671958	4.85147e-147	2.10719e-142	0.457	0.241	phosphoglycerate mutase 1 [Source:HGNC Symbol;Acc:HGNC:8888]	GO:0003824(catalytic activity);GO:0004082(bisphosphoglycerate mutase activity);GO:0004619(phosphoglycerate mutase activity);GO:0005515(protein binding);GO:0005576(extracellular region);GO:0005634(nucleus);GO:0005737(cytoplasm);GO:0005829(cytosol);GO:0006094(gluconeogenesis);GO:0006096(glycolytic process);GO:0006110(regulation of glycolytic process);GO:0016020(membrane);GO:0016787(hydrolase activi…	00010(Glycolysis / Gluconeogenesis);00260(Glycine, serine and threonine metabolism);04922(Glucagon signaling pathway);05230(Central carbon metabolism in cancer)	up
ENSG00000120896	SORBS3	-0.47449	7.66117e-147	3.32755e-142	0.061	0.218	sorbin and SH3 domain containing 3 [Source:HGNC Symbol;Acc:HGNC:30907]	GO:0000122(negative regulation of transcription by RNA polymerase II);GO:0005200(structural constituent of cytoskeleton);GO:0005515(protein binding);GO:0005634(nucleus);GO:0005737(cytoplasm);GO:0005829(cytosol);GO:0005856(cytoskeleton);GO:0005925(focal adhesion);GO:0006936(muscle contraction);GO:0007015(actin filament organization);GO:0007155(cell adhesion);GO:0008134(transcription factor binding…	NA	down
ENSG00000122026	RPL21	-0.505851	2.13081e-146	9.25495e-142	0.778	0.899	ribosomal protein L21 [Source:HGNC Symbol;Acc:HGNC:10313]	GO:0000184(nuclear-transcribed mRNA catabolic process, nonsense-mediated decay);GO:0003723(RNA binding);GO:0003735(structural constituent of ribosome);GO:0005515(protein binding);GO:0005622(intracellular);GO:0005737(cytoplasm);GO:0005783(endoplasmic reticulum);GO:0005829(cytosol);GO:0005840(ribosome);GO:0006412(translation);GO:0006413(translational initiation);GO:0006614(SRP-dependent cotranslati…	03010(Ribosome)	down
ENSG00000257764	AC020656.1	0.801331	2.24533e-146	9.75237e-142	0.29	0.109	novel transcript, antisense to LYZ	NA	NA	up
ENSG00000122986	HVCN1	-0.466651	5.33399e-146	2.31677e-141	0.062	0.221	hydrogen voltage gated channel 1 [Source:HGNC Symbol;Acc:HGNC:28240]	GO:0005216(ion channel activity);GO:0005244(voltage-gated ion channel activity);GO:0005886(plasma membrane);GO:0005887(integral component of plasma membrane);GO:0006811(ion transport);GO:0009268(response to pH);GO:0010043(response to zinc ion);GO:0016020(membrane);GO:0016021(integral component of membrane);GO:0022843(voltage-gated cation channel activity);GO:0030171(voltage-gated proton channel a…	NA	down
ENSG00000143870	PDIA6	0.697994	1.22804e-145	5.33386e-141	0.51	0.333	protein disulfide isomerase family A member 6 [Source:HGNC Symbol;Acc:HGNC:30168]	GO:0003756(protein disulfide isomerase activity);GO:0005515(protein binding);GO:0005615(extracellular space);GO:0005623(cell);GO:0005783(endoplasmic reticulum);GO:0005788(endoplasmic reticulum lumen);GO:0005789(endoplasmic reticulum membrane);GO:0005793(endoplasmic reticulum-Golgi intermediate compartment);GO:0005829(cytosol);GO:0005886(plasma membrane);GO:0006457(protein folding);GO:0015037(pept…	04141(Protein processing in endoplasmic reticulum)	up
ENSG00000225972	MTND1P23	1.29007	6.69717e-145	2.90885e-140	0.126	0.025	MT-ND1 pseudogene 23 [Source:HGNC Symbol;Acc:HGNC:42092]	NA	NA	up
ENSG00000233927	RPS28	-0.456717	6.93062e-145	3.01025e-140	0.936	0.968	ribosomal protein S28 [Source:HGNC Symbol;Acc:HGNC:10418]	GO:0000028(ribosomal small subunit assembly);GO:0000184(nuclear-transcribed mRNA catabolic process, nonsense-mediated decay);GO:0002181(cytoplasmic translation);GO:0003723(RNA binding);GO:0003735(structural constituent of ribosome);GO:0005515(protein binding);GO:0005622(intracellular);GO:0005654(nucleoplasm);GO:0005737(cytoplasm);GO:0005783(endoplasmic reticulum);GO:0005791(rough endoplasmic reti…	03010(Ribosome)	down
ENSG00000181722	ZBTB20	-0.504976	1.18782e-144	5.15919e-140	0.058	0.215	zinc finger and BTB domain containing 20 [Source:HGNC Symbol;Acc:HGNC:13503]	GO:0000122(negative regulation of transcription by RNA polymerase II);GO:0000981(DNA-binding transcription factor activity, RNA polymerase II-specific);GO:0001227(DNA-binding transcription repressor activity, RNA polymerase II-specific);GO:0003676(nucleic acid binding);GO:0003677(DNA binding);GO:0005515(protein binding);GO:0005634(nucleus);GO:0005654(nucleoplasm);GO:0005737(cytoplasm);GO:0010629(…	NA	down
ENSG00000167772	ANGPTL4	0.568691	1.32384e-144	5.74995e-140	0.131	0.006	angiopoietin like 4 [Source:HGNC Symbol;Acc:HGNC:16039]	GO:0001525(angiogenesis);GO:0001666(response to hypoxia);GO:0004857(enzyme inhibitor activity);GO:0005515(protein binding);GO:0005576(extracellular region);GO:0005615(extracellular space);GO:0007275(multicellular organism development);GO:0019216(regulation of lipid metabolic process);GO:0030154(cell differentiation);GO:0042802(identical protein binding);GO:0043066(negative regulation of apoptotic…	03320(PPAR signaling pathway);04979(Cholesterol metabolism)	up
ENSG00000165475	CRYL1	-0.55189	4.93637e-144	2.14406e-139	0.104	0.286	crystallin lambda 1 [Source:HGNC Symbol;Acc:HGNC:18246]	GO:0003857(3-hydroxyacyl-CoA dehydrogenase activity);GO:0005737(cytoplasm);GO:0005829(cytosol);GO:0006631(fatty acid metabolic process);GO:0016491(oxidoreductase activity);GO:0019640(glucuronate catabolic process to xylulose 5-phosphate);GO:0042803(protein homodimerization activity);GO:0050104(L-gulonate 3-dehydrogenase activity);GO:0055114(oxidation-reduction process);GO:0070062(extracellular ex…	00040(Pentose and glucuronate interconversions)	down
ENSG00000171222	SCAND1	0.650629	6.12887e-144	2.66201e-139	0.452	0.235	SCAN domain containing 1 [Source:HGNC Symbol;Acc:HGNC:10566]	GO:0003677(DNA binding);GO:0003700(DNA-binding transcription factor activity);GO:0003713(transcription coactivator activity);GO:0005515(protein binding);GO:0005634(nucleus);GO:0006355(regulation of transcription, DNA-templated);GO:0042802(identical protein binding);GO:1903508(positive regulation of nucleic acid-templated transcription)	NA	up
ENSG00000119138	KLF9	-0.624089	6.60596e-144	2.86923e-139	0.305	0.534	Kruppel like factor 9 [Source:HGNC Symbol;Acc:HGNC:1123]	GO:0000981(DNA-binding transcription factor activity, RNA polymerase II-specific);GO:0003676(nucleic acid binding);GO:0003677(DNA binding);GO:0003700(DNA-binding transcription factor activity);GO:0005634(nucleus);GO:0005654(nucleoplasm);GO:0005829(cytosol);GO:0005886(plasma membrane);GO:0006357(regulation of transcription by RNA polymerase II);GO:0007623(circadian rhythm);GO:0010839(negative regu…	NA	down
ENSG00000104964	AES	-0.591677	7.07682e-144	3.07375e-139	0.361	0.583	amino-terminal enhancer of split [Source:HGNC Symbol;Acc:HGNC:307]	GO:0000122(negative regulation of transcription by RNA polymerase II);GO:0001501(skeletal system development);GO:0003714(transcription corepressor activity);GO:0005515(protein binding);GO:0005634(nucleus);GO:0005667(transcription factor complex);GO:0006355(regulation of transcription, DNA-templated);GO:0006357(regulation of transcription by RNA polymerase II);GO:0007275(multicellular organism dev…	NA	down
ENSG00000132965	ALOX5AP	0.764294	8.08373e-144	3.51109e-139	0.488	0.46	arachidonate 5-lipoxygenase activating protein [Source:HGNC Symbol;Acc:HGNC:436]	GO:0002540(leukotriene production involved in inflammatory response);GO:0002675(positive regulation of acute inflammatory response);GO:0004051(arachidonate 5-lipoxygenase activity);GO:0004364(glutathione transferase activity);GO:0004464(leukotriene-C4 synthase activity);GO:0004602(glutathione peroxidase activity);GO:0005515(protein binding);GO:0005634(nucleus);GO:0005635(nuclear envelope);GO:0005…	04664(Fc epsilon RI signaling pathway)	up
ENSG00000112096	SOD2	0.660944	1.85384e-143	8.05197e-139	0.854	0.739	superoxide dismutase 2 [Source:HGNC Symbol;Acc:HGNC:11180]	GO:0000303(response to superoxide);GO:0001315(age-dependent response to reactive oxygen species);GO:0001836(release of cytochrome c from mitochondria);GO:0003069(acetylcholine-mediated vasodilation involved in regulation of systemic arterial blood pressure);GO:0004784(superoxide dismutase activity);GO:0005739(mitochondrion);GO:0005759(mitochondrial matrix);GO:0006357(regulation of transcription b…	04068(FoxO signaling pathway);04146(Peroxisome);04211(Longevity regulating pathway);04213(Longevity regulating pathway - multiple species);05016(Huntington disease)	up
ENSG00000101182	PSMA7	0.539587	3.96668e-142	1.72289e-137	0.745	0.639	proteasome subunit alpha 7 [Source:HGNC Symbol;Acc:HGNC:9536]	GO:0000165(MAPK cascade);GO:0000209(protein polyubiquitination);GO:0000502(proteasome complex);GO:0002223(stimulatory C-type lectin receptor signaling pathway);GO:0002479(antigen processing and presentation of exogenous peptide antigen via MHC class I, TAP-dependent);GO:0004175(endopeptidase activity);GO:0004298(threonine-type endopeptidase activity);GO:0005515(protein binding);GO:0005634(nucleus…	03050(Proteasome)	up
ENSG00000162512	SDC3	-0.534249	5.70668e-142	2.47864e-137	0.071	0.237	syndecan 3 [Source:HGNC Symbol;Acc:HGNC:10660]	GO:0001523(retinoid metabolic process);GO:0005515(protein binding);GO:0005796(Golgi lumen);GO:0005886(plasma membrane);GO:0006024(glycosaminoglycan biosynthetic process);GO:0006027(glycosaminoglycan catabolic process);GO:0009986(cell surface);GO:0016020(membrane);GO:0016021(integral component of membrane);GO:0016477(cell migration);GO:0042802(identical protein binding);GO:0043202(lysosomal lumen)…	04514(Cell adhesion molecules (CAMs))	down
ENSG00000064601	CTSA	0.669948	1.42268e-141	6.17928e-137	0.497	0.276	cathepsin A [Source:HGNC Symbol;Acc:HGNC:9251]	GO:0004180(carboxypeptidase activity);GO:0004185(serine-type carboxypeptidase activity);GO:0005576(extracellular region);GO:0005654(nucleoplasm);GO:0005764(lysosome);GO:0005765(lysosomal membrane);GO:0005783(endoplasmic reticulum);GO:0006508(proteolysis);GO:0006687(glycosphingolipid metabolic process);GO:0006886(intracellular protein transport);GO:0008047(enzyme activator activity);GO:0008233(pep…	04142(Lysosome);04614(Renin-angiotensin system)	up
ENSG00000118680	MYL12B	0.563621	1.46648e-141	6.36951e-137	0.712	0.58	myosin light chain 12B [Source:HGNC Symbol;Acc:HGNC:29827]	GO:0005509(calcium ion binding);GO:0005515(protein binding);GO:0005829(cytosol);GO:0006936(muscle contraction);GO:0016459(myosin complex);GO:0046872(metal ion binding);GO:0070062(extracellular exosome);GO:0099738(cell cortex region)	04360(Axon guidance);04510(Focal adhesion);04530(Tight junction);04611(Platelet activation);04670(Leukocyte transendothelial migration);04810(Regulation of actin cytoskeleton)	up
ENSG00000179583	CIITA	-0.448757	2.42887e-141	1.05495e-136	0.059	0.212	class II major histocompatibility complex transactivator [Source:HGNC Symbol;Acc:HGNC:7067]	GO:0000122(negative regulation of transcription by RNA polymerase II);GO:0000166(nucleotide binding);GO:0003713(transcription coactivator activity);GO:0005515(protein binding);GO:0005524(ATP binding);GO:0005525(GTP binding);GO:0005634(nucleus);GO:0005654(nucleoplasm);GO:0006355(regulation of transcription, DNA-templated);GO:0006954(inflammatory response);GO:0006955(immune response);GO:0007568(agi…	04612(Antigen processing and presentation);05145(Toxoplasmosis);05152(Tuberculosis);05164(Influenza A);05340(Primary immunodeficiency)	down
ENSG00000189058	APOD	-0.517551	4.4762e-141	1.94419e-136	0.098	0.279	apolipoprotein D [Source:HGNC Symbol;Acc:HGNC:612]	GO:0000302(response to reactive oxygen species);GO:0001525(angiogenesis);GO:0005319(lipid transporter activity);GO:0005515(protein binding);GO:0005576(extracellular region);GO:0005615(extracellular space);GO:0005737(cytoplasm);GO:0005783(endoplasmic reticulum);GO:0006006(glucose metabolic process);GO:0006629(lipid metabolic process);GO:0006869(lipid transport);GO:0007420(brain development);GO:000…	NA	down
ENSG00000112715	VEGFA	0.780565	6.1753e-141	2.68218e-136	0.478	0.272	vascular endothelial growth factor A [Source:HGNC Symbol;Acc:HGNC:12680]	GO:0000122(negative regulation of transcription by RNA polymerase II);GO:0001525(angiogenesis);GO:0001541(ovarian follicle development);GO:0001569(branching involved in blood vessel morphogenesis);GO:0001570(vasculogenesis);GO:0001666(response to hypoxia);GO:0001701(in utero embryonic development);GO:0001822(kidney development);GO:0001934(positive regulation of protein phosphorylation);GO:0001938…	01521(EGFR tyrosine kinase inhibitor resistance);04010(MAPK signaling pathway);04014(Ras signaling pathway);04015(Rap1 signaling pathway);04066(HIF-1 signaling pathway);04151(PI3K-Akt signaling pathway);04370(VEGF signaling pathway);04510(Focal adhesion);04926(Relaxin signaling pathway);04933(AGE-RAGE signaling pathway in diabetic complications);05163(Human cytomegalovirus infection);05165(Human …	up
ENSG00000068305	MEF2A	-0.594675	8.08581e-141	3.51199e-136	0.275	0.493	myocyte enhancer factor 2A [Source:HGNC Symbol;Acc:HGNC:6993]	GO:0000002(mitochondrial genome maintenance);GO:0000122(negative regulation of transcription by RNA polymerase II);GO:0000165(MAPK cascade);GO:0000790(nuclear chromatin);GO:0000977(RNA polymerase II regulatory region sequence-specific DNA binding);GO:0000978(RNA polymerase II proximal promoter sequence-specific DNA binding);GO:0000981(DNA-binding transcription factor activity, RNA polymerase II-s…	04022(cGMP-PKG signaling pathway);04371(Apelin signaling pathway);04928(Parathyroid hormone synthesis, secretion and action);05418(Fluid shear stress and atherosclerosis)	down
ENSG00000248187	AC078850.1	0.43449	3.17433e-140	1.37874e-135	0.124	0.005	novel transcript	NA	NA	up
ENSG00000173391	OLR1	0.708135	3.22483e-140	1.40067e-135	0.316	0.11	oxidized low density lipoprotein receptor 1 [Source:HGNC Symbol;Acc:HGNC:8133]	GO:0002376(immune system process);GO:0005515(protein binding);GO:0005576(extracellular region);GO:0005654(nucleoplasm);GO:0005886(plasma membrane);GO:0005887(integral component of plasma membrane);GO:0006508(proteolysis);GO:0006954(inflammatory response);GO:0007155(cell adhesion);GO:0008015(blood circulation);GO:0016020(membrane);GO:0016021(integral component of membrane);GO:0030246(carbohydrate …	03320(PPAR signaling pathway);04145(Phagosome)	up
ENSG00000102760	RGCC	0.864102	5.70267e-140	2.4769e-135	0.383	0.174	regulator of cell cycle [Source:HGNC Symbol;Acc:HGNC:20369]	GO:0001100(negative regulation of exit from mitosis);GO:0001937(negative regulation of endothelial cell proliferation);GO:0003331(positive regulation of extracellular matrix constituent secretion);GO:0005515(protein binding);GO:0005634(nucleus);GO:0005730(nucleolus);GO:0005737(cytoplasm);GO:0005813(centrosome);GO:0005815(microtubule organizing center);GO:0005829(cytosol);GO:0005856(cytoskeleton);…	NA	up
ENSG00000177700	POLR2L	0.647036	5.88832e-140	2.55753e-135	0.581	0.396	RNA polymerase II subunit L [Source:HGNC Symbol;Acc:HGNC:9199]	GO:0000398(mRNA splicing, via spliceosome);GO:0001054(RNA polymerase I activity);GO:0001055(RNA polymerase II activity);GO:0001056(RNA polymerase III activity);GO:0003677(DNA binding);GO:0003899(DNA-directed 5'-3' RNA polymerase activity);GO:0005515(protein binding);GO:0005634(nucleus);GO:0005654(nucleoplasm);GO:0005665(RNA polymerase II, core complex);GO:0005666(RNA polymerase III complex);GO:00…	03020(RNA polymerase);04623(Cytosolic DNA-sensing pathway);05016(Huntington disease)	up
ENSG00000071127	WDR1	0.641565	1.26463e-139	5.49281e-135	0.507	0.307	WD repeat domain 1 [Source:HGNC Symbol;Acc:HGNC:12754]	GO:0002102(podosome);GO:0002446(neutrophil mediated immunity);GO:0002576(platelet degranulation);GO:0003779(actin binding);GO:0005515(protein binding);GO:0005576(extracellular region);GO:0005737(cytoplasm);GO:0005829(cytosol);GO:0005856(cytoskeleton);GO:0005884(actin filament);GO:0005886(plasma membrane);GO:0005911(cell-cell junction);GO:0007605(sensory perception of sound);GO:0008360(regulation …	NA	up
ENSG00000158869	FCER1G	0.441693	2.21401e-139	9.61632e-135	0.93	0.908	Fc fragment of IgE receptor Ig [Source:HGNC Symbol;Acc:HGNC:3611]	GO:0001798(positive regulation of type IIa hypersensitivity);GO:0001805(positive regulation of type III hypersensitivity);GO:0001812(positive regulation of type I hypersensitivity);GO:0002223(stimulatory C-type lectin receptor signaling pathway);GO:0002283(neutrophil activation involved in immune response);GO:0002292(T cell differentiation involved in immune response);GO:0002376(immune system pro…	04071(Sphingolipid signaling pathway);04072(Phospholipase D signaling pathway);04611(Platelet activation);04625(C-type lectin receptor signaling pathway);04650(Natural killer cell mediated cytotoxicity);04664(Fc epsilon RI signaling pathway);05152(Tuberculosis);05310(Asthma)	up
ENSG00000106785	TRIM14	-0.556932	4.2255e-139	1.8353e-134	0.1	0.273	tripartite motif containing 14 [Source:HGNC Symbol;Acc:HGNC:16283]	GO:0002376(immune system process);GO:0003674(molecular_function);GO:0005515(protein binding);GO:0005739(mitochondrion);GO:0005741(mitochondrial outer membrane);GO:0008270(zinc ion binding);GO:0016020(membrane);GO:0032897(negative regulation of viral transcription);GO:0045087(innate immune response);GO:0046872(metal ion binding);GO:0051091(positive regulation of DNA-binding transcription factor ac…	NA	down
ENSG00000171631	P2RY6	-0.28984	1.39664e-138	6.06616e-134	0.006	0.091	pyrimidinergic receptor P2Y6 [Source:HGNC Symbol;Acc:HGNC:8543]	GO:0001621(ADP receptor activity);GO:0004930(G protein-coupled receptor activity);GO:0005515(protein binding);GO:0005886(plasma membrane);GO:0005887(integral component of plasma membrane);GO:0006909(phagocytosis);GO:0007165(signal transduction);GO:0007186(G protein-coupled receptor signaling pathway);GO:0007200(phospholipase C-activating G protein-coupled receptor signaling pathway);GO:0007202(ac…	04080(Neuroactive ligand-receptor interaction)	no_diff
ENSG00000167703	SLC43A2	0.700625	1.43367e-138	6.22702e-134	0.598	0.418	solute carrier family 43 member 2 [Source:HGNC Symbol;Acc:HGNC:23087]	GO:0003333(amino acid transmembrane transport);GO:0005886(plasma membrane);GO:0006865(amino acid transport);GO:0015171(amino acid transmembrane transporter activity);GO:0015175(neutral amino acid transmembrane transporter activity);GO:0015179(L-amino acid transmembrane transporter activity);GO:0015804(neutral amino acid transport);GO:0015807(L-amino acid transport);GO:0016020(membrane);GO:0016021…	NA	up
ENSG00000138640	FAM13A	-0.593189	4.64537e-138	2.01767e-133	0.145	0.341	family with sequence similarity 13 member A [Source:HGNC Symbol;Acc:HGNC:19367]	GO:0005096(GTPase activator activity);GO:0005829(cytosol);GO:0007165(signal transduction);GO:0043547(positive regulation of GTPase activity);GO:0051056(regulation of small GTPase mediated signal transduction)	NA	down
ENSG00000140859	KIFC3	0.480936	9.53722e-138	4.14239e-133	0.174	0.026	kinesin family member C3 [Source:HGNC Symbol;Acc:HGNC:6326]	GO:0000166(nucleotide binding);GO:0003774(motor activity);GO:0003777(microtubule motor activity);GO:0005515(protein binding);GO:0005524(ATP binding);GO:0005737(cytoplasm);GO:0005794(Golgi apparatus);GO:0005813(centrosome);GO:0005815(microtubule organizing center);GO:0005856(cytoskeleton);GO:0005871(kinesin complex);GO:0005874(microtubule);GO:0005912(adherens junction);GO:0005915(zonula adherens);…	NA	up
ENSG00000125384	PTGER2	0.625386	5.65163e-137	2.45473e-132	0.257	0.075	prostaglandin E receptor 2 [Source:HGNC Symbol;Acc:HGNC:9594]	GO:0004930(G protein-coupled receptor activity);GO:0004957(prostaglandin E receptor activity);GO:0005886(plasma membrane);GO:0005887(integral component of plasma membrane);GO:0006954(inflammatory response);GO:0007165(signal transduction);GO:0007186(G protein-coupled receptor signaling pathway);GO:0007189(adenylate cyclase-activating G protein-coupled receptor signaling pathway);GO:0007204(positiv…	04024(cAMP signaling pathway);04080(Neuroactive ligand-receptor interaction);04750(Inflammatory mediator regulation of TRP channels);04924(Renin secretion);05163(Human cytomegalovirus infection);05200(Pathways in cancer)	up
ENSG00000137309	HMGA1	0.672496	7.09385e-137	3.08114e-132	0.432	0.238	high mobility group AT-hook 1 [Source:HGNC Symbol;Acc:HGNC:5010]	GO:0000785(chromatin);GO:0000981(DNA-binding transcription factor activity, RNA polymerase II-specific);GO:0001158(enhancer sequence-specific DNA binding);GO:0003677(DNA binding);GO:0003680(AT DNA binding);GO:0003682(chromatin binding);GO:0003713(transcription coactivator activity);GO:0003906(DNA-(apurinic or apyrimidinic site) endonuclease activity);GO:0005515(protein binding);GO:0005634(nucleus…	NA	up
ENSG00000279166	AC009951.1	0.699206	1.42676e-136	6.19697e-132	0.311	0.119	TEC	NA	NA	up
ENSG00000134769	DTNA	-0.332601	7.76807e-136	3.37398e-131	0.011	0.106	dystrobrevin alpha [Source:HGNC Symbol;Acc:HGNC:3057]	GO:0005515(protein binding);GO:0005737(cytoplasm);GO:0005886(plasma membrane);GO:0006941(striated muscle contraction);GO:0007165(signal transduction);GO:0007268(chemical synaptic transmission);GO:0007274(neuromuscular synaptic transmission);GO:0008270(zinc ion binding);GO:0016020(membrane);GO:0030054(cell junction);GO:0030165(PDZ domain binding);GO:0030424(axon);GO:0031234(extrinsic component of …	NA	down
ENSG00000173457	PPP1R14B	0.666731	8.28946e-136	3.60044e-131	0.453	0.278	protein phosphatase 1 regulatory inhibitor subunit 14B [Source:HGNC Symbol;Acc:HGNC:9057]	GO:0004864(protein phosphatase inhibitor activity);GO:0004865(protein serine/threonine phosphatase inhibitor activity);GO:0005737(cytoplasm);GO:0032515(negative regulation of phosphoprotein phosphatase activity);GO:0042325(regulation of phosphorylation);GO:0045087(innate immune response)	NA	up
ENSG00000198816	ZNF358	-0.447706	9.0894e-136	3.94789e-131	0.053	0.2	zinc finger protein 358 [Source:HGNC Symbol;Acc:HGNC:16838]	GO:0000981(DNA-binding transcription factor activity, RNA polymerase II-specific);GO:0003676(nucleic acid binding);GO:0003677(DNA binding);GO:0005634(nucleus);GO:0006357(regulation of transcription by RNA polymerase II);GO:0019827(stem cell population maintenance);GO:0021915(neural tube development);GO:0035115(embryonic forelimb morphogenesis);GO:0046872(metal ion binding)	NA	down
ENSG00000132432	SEC61G	0.654932	9.9687e-136	4.32981e-131	0.49	0.3	Sec61 translocon gamma subunit [Source:HGNC Symbol;Acc:HGNC:18277]	GO:0005515(protein binding);GO:0005623(cell);GO:0005783(endoplasmic reticulum);GO:0005789(endoplasmic reticulum membrane);GO:0005829(cytosol);GO:0006605(protein targeting);GO:0006886(intracellular protein transport);GO:0008565(protein transporter activity);GO:0015031(protein transport);GO:0015450(P-P-bond-hydrolysis-driven protein transmembrane transporter activity);GO:0016020(membrane);GO:001602…	03060(Protein export);04141(Protein processing in endoplasmic reticulum);04145(Phagosome);05110(Vibrio cholerae infection)	up
ENSG00000163563	MNDA	0.755105	1.14545e-135	4.97515e-131	0.522	0.367	myeloid cell nuclear differentiation antigen [Source:HGNC Symbol;Acc:HGNC:7183]	GO:0002218(activation of innate immune response);GO:0003677(DNA binding);GO:0005515(protein binding);GO:0005576(extracellular region);GO:0005634(nucleus);GO:0005654(nucleoplasm);GO:0005730(nucleolus);GO:0005737(cytoplasm);GO:0006968(cellular defense response);GO:0006974(cellular response to DNA damage stimulus);GO:0030889(negative regulation of B cell proliferation);GO:0035458(cellular response t…	NA	up
ENSG00000173110	HSPA6	-0.597679	1.60367e-135	6.96538e-131	0.224	0.44	heat shock protein family A (Hsp70) member 6 [Source:HGNC Symbol;Acc:HGNC:5239]	GO:0000166(nucleotide binding);GO:0005515(protein binding);GO:0005524(ATP binding);GO:0005576(extracellular region);GO:0005634(nucleus);GO:0005737(cytoplasm);GO:0005814(centriole);GO:0005829(cytosol);GO:0006986(response to unfolded protein);GO:0008180(COP9 signalosome);GO:0016887(ATPase activity);GO:0019899(enzyme binding);GO:0031072(heat shock protein binding);GO:0032991(protein-containing compl…	03040(Spliceosome);04010(MAPK signaling pathway);04141(Protein processing in endoplasmic reticulum);04144(Endocytosis);04213(Longevity regulating pathway - multiple species);04612(Antigen processing and presentation);04915(Estrogen signaling pathway);05134(Legionellosis);05145(Toxoplasmosis);05162(Measles);05164(Influenza A)	down
ENSG00000124614	RPS10	-0.579778	1.82462e-134	7.92506e-130	0.404	0.587	ribosomal protein S10 [Source:HGNC Symbol;Acc:HGNC:10383]	GO:0000028(ribosomal small subunit assembly);GO:0000184(nuclear-transcribed mRNA catabolic process, nonsense-mediated decay);GO:0003723(RNA binding);GO:0003735(structural constituent of ribosome);GO:0005515(protein binding);GO:0005634(nucleus);GO:0005654(nucleoplasm);GO:0005730(nucleolus);GO:0005737(cytoplasm);GO:0005829(cytosol);GO:0005840(ribosome);GO:0005925(focal adhesion);GO:0006412(translat…	03010(Ribosome)	down
ENSG00000214026	MRPL23	0.643709	2.19637e-134	9.53973e-130	0.4	0.195	mitochondrial ribosomal protein L23 [Source:HGNC Symbol;Acc:HGNC:10322]	GO:0001650(fibrillar center);GO:0003723(RNA binding);GO:0003735(structural constituent of ribosome);GO:0005515(protein binding);GO:0005622(intracellular);GO:0005739(mitochondrion);GO:0005743(mitochondrial inner membrane);GO:0005762(mitochondrial large ribosomal subunit);GO:0005840(ribosome);GO:0006412(translation);GO:0032543(mitochondrial translation);GO:0070125(mitochondrial translational elonga…	03010(Ribosome)	up
ENSG00000135837	CEP350	-0.609125	2.75885e-134	1.19828e-129	0.297	0.506	centrosomal protein 350 [Source:HGNC Symbol;Acc:HGNC:24238]	GO:0005515(protein binding);GO:0005634(nucleus);GO:0005737(cytoplasm);GO:0005813(centrosome);GO:0005814(centriole);GO:0005815(microtubule organizing center);GO:0005819(spindle);GO:0005856(cytoskeleton);GO:0008017(microtubule binding);GO:0016020(membrane);GO:0034453(microtubule anchoring);GO:0042995(cell projection)	NA	down
ENSG00000128340	RAC2	0.654585	4.94233e-134	2.14665e-129	0.436	0.236	Rac family small GTPase 2 [Source:HGNC Symbol;Acc:HGNC:9802]	GO:0000166(nucleotide binding);GO:0003924(GTPase activity);GO:0005515(protein binding);GO:0005525(GTP binding);GO:0005622(intracellular);GO:0005635(nuclear envelope);GO:0005737(cytoplasm);GO:0005829(cytosol);GO:0005884(actin filament);GO:0005886(plasma membrane);GO:0005925(focal adhesion);GO:0006935(chemotaxis);GO:0007015(actin filament organization);GO:0007165(signal transduction);GO:0007186(G p…	04010(MAPK signaling pathway);04014(Ras signaling pathway);04015(Rap1 signaling pathway);04024(cAMP signaling pathway);04062(Chemokine signaling pathway);04071(Sphingolipid signaling pathway);04310(Wnt signaling pathway);04360(Axon guidance);04370(VEGF signaling pathway);04510(Focal adhesion);04520(Adherens junction);04650(Natural killer cell mediated cytotoxicity);04662(B cell receptor signaling…	up
ENSG00000123610	TNFAIP6	0.59824	5.08464e-134	2.20846e-129	0.215	0.049	TNF alpha induced protein 6 [Source:HGNC Symbol;Acc:HGNC:11898]	GO:0005515(protein binding);GO:0005540(hyaluronic acid binding);GO:0005576(extracellular region);GO:0005615(extracellular space);GO:0006954(inflammatory response);GO:0007155(cell adhesion);GO:0007165(signal transduction);GO:0007267(cell-cell signaling);GO:0030335(positive regulation of cell migration);GO:0030728(ovulation);GO:0043312(neutrophil degranulation);GO:0050728(negative regulation of inf…	NA	up
ENSG00000154262	ABCA6	-0.405725	5.41861e-134	2.35352e-129	0.016	0.12	ATP binding cassette subfamily A member 6 [Source:HGNC Symbol;Acc:HGNC:36]	GO:0000166(nucleotide binding);GO:0005319(lipid transporter activity);GO:0005524(ATP binding);GO:0005654(nucleoplasm);GO:0005886(plasma membrane);GO:0006869(lipid transport);GO:0016020(membrane);GO:0016021(integral component of membrane);GO:0016887(ATPase activity);GO:0042626(ATPase activity, coupled to transmembrane movement of substances);GO:0043231(intracellular membrane-bounded organelle);GO:…	02010(ABC transporters)	down
ENSG00000133121	STARD13	-0.397829	7.01124e-134	3.04526e-129	0.035	0.161	StAR related lipid transfer domain containing 13 [Source:HGNC Symbol;Acc:HGNC:19164]	GO:0005096(GTPase activator activity);GO:0005515(protein binding);GO:0005737(cytoplasm);GO:0005739(mitochondrion);GO:0005811(lipid droplet);GO:0005829(cytosol);GO:0007165(signal transduction);GO:0008289(lipid binding);GO:0016020(membrane);GO:0031966(mitochondrial membrane);GO:0043542(endothelial cell migration);GO:0043547(positive regulation of GTPase activity);GO:0051056(regulation of small GTPa…	NA	down
ENSG00000171115	GIMAP8	-0.435846	1.2806e-133	5.56214e-129	0.058	0.207	GTPase, IMAP family member 8 [Source:HGNC Symbol;Acc:HGNC:21792]	GO:0000166(nucleotide binding);GO:0005525(GTP binding);GO:0005737(cytoplasm);GO:0005739(mitochondrion);GO:0005783(endoplasmic reticulum);GO:0005794(Golgi apparatus);GO:0005829(cytosol);GO:0070232(regulation of T cell apoptotic process)	NA	down
ENSG00000226380	AC016831.1	0.623914	1.67658e-133	7.28205e-129	0.247	0.076	novel transcript	NA	NA	up
ENSG00000113719	ERGIC1	0.664312	3.03537e-133	1.31838e-128	0.433	0.227	endoplasmic reticulum-golgi intermediate compartment 1 [Source:HGNC Symbol;Acc:HGNC:29205]	GO:0000139(Golgi membrane);GO:0005515(protein binding);GO:0005654(nucleoplasm);GO:0005783(endoplasmic reticulum);GO:0005789(endoplasmic reticulum membrane);GO:0005793(endoplasmic reticulum-Golgi intermediate compartment);GO:0005794(Golgi apparatus);GO:0006888(endoplasmic reticulum to Golgi vesicle-mediated transport);GO:0006890(retrograde vesicle-mediated transport, Golgi to endoplasmic reticulum…	NA	up
ENSG00000175550	DRAP1	0.623343	3.91462e-133	1.70028e-128	0.486	0.288	DR1 associated protein 1 [Source:HGNC Symbol;Acc:HGNC:3019]	GO:0000122(negative regulation of transcription by RNA polymerase II);GO:0003677(DNA binding);GO:0003700(DNA-binding transcription factor activity);GO:0003712(transcription coregulator activity);GO:0003714(transcription corepressor activity);GO:0005515(protein binding);GO:0005634(nucleus);GO:0042802(identical protein binding);GO:0046982(protein heterodimerization activity)	NA	up
ENSG00000188257	PLA2G2A	-0.429261	4.13136e-133	1.79441e-128	0.076	0.23	phospholipase A2 group IIA [Source:HGNC Symbol;Acc:HGNC:9031]	GO:0004623(phospholipase A2 activity);GO:0005509(calcium ion binding);GO:0005543(phospholipid binding);GO:0005576(extracellular region);GO:0005615(extracellular space);GO:0005783(endoplasmic reticulum);GO:0005789(endoplasmic reticulum membrane);GO:0005886(plasma membrane);GO:0006629(lipid metabolic process);GO:0006644(phospholipid metabolic process);GO:0006654(phosphatidic acid biosynthetic proce…	00564(Glycerophospholipid metabolism);00565(Ether lipid metabolism);00590(Arachidonic acid metabolism);00591(Linoleic acid metabolism);00592(alpha-Linolenic acid metabolism);04014(Ras signaling pathway);04270(Vascular smooth muscle contraction);04972(Pancreatic secretion);04975(Fat digestion and absorption)	down
ENSG00000157107	FCHO2	-0.588313	1.62855e-132	7.07344e-128	0.169	0.364	FCH domain only 2 [Source:HGNC Symbol;Acc:HGNC:25180]	GO:0001786(phosphatidylserine binding);GO:0005515(protein binding);GO:0005543(phospholipid binding);GO:0005546(phosphatidylinositol-4,5-bisphosphate binding);GO:0005737(cytoplasm);GO:0005829(cytosol);GO:0005856(cytoskeleton);GO:0005886(plasma membrane);GO:0005905(clathrin-coated pit);GO:0006897(endocytosis);GO:0008017(microtubule binding);GO:0008092(cytoskeletal protein binding);GO:0010324(membra…	NA	down
ENSG00000075223	SEMA3C	0.443896	2.60226e-132	1.13026e-127	0.154	0.018	semaphorin 3C [Source:HGNC Symbol;Acc:HGNC:10725]	GO:0001755(neural crest cell migration);GO:0001756(somitogenesis);GO:0001974(blood vessel remodeling);GO:0003148(outflow tract septum morphogenesis);GO:0003151(outflow tract morphogenesis);GO:0003215(cardiac right ventricle morphogenesis);GO:0003350(pulmonary myocardium development);GO:0005515(protein binding);GO:0005576(extracellular region);GO:0005615(extracellular space);GO:0005887(integral co…	04360(Axon guidance)	up
ENSG00000171858	RPS21	-0.459185	5.64768e-132	2.45301e-127	0.86	0.924	ribosomal protein S21 [Source:HGNC Symbol;Acc:HGNC:10409]	GO:0000184(nuclear-transcribed mRNA catabolic process, nonsense-mediated decay);GO:0000447(endonucleolytic cleavage in ITS1 to separate SSU-rRNA from 5.8S rRNA and LSU-rRNA from tricistronic rRNA transcript (SSU-rRNA, 5.8S rRNA, LSU-rRNA));GO:0000461(endonucleolytic cleavage to generate mature 3'-end of SSU-rRNA from (SSU-rRNA, 5.8S rRNA, LSU-rRNA));GO:0002181(cytoplasmic translation);GO:0003723(…	03010(Ribosome)	down
ENSG00000153208	MERTK	-0.600066	8.50826e-132	3.69548e-127	0.286	0.49	MER proto-oncogene, tyrosine kinase [Source:HGNC Symbol;Acc:HGNC:7027]	GO:0000166(nucleotide binding);GO:0001750(photoreceptor outer segment);GO:0001779(natural killer cell differentiation);GO:0001818(negative regulation of cytokine production);GO:0004672(protein kinase activity);GO:0004713(protein tyrosine kinase activity);GO:0004714(transmembrane receptor protein tyrosine kinase activity);GO:0005515(protein binding);GO:0005524(ATP binding);GO:0005615(extracellular…	NA	down
ENSG00000129824	RPS4Y1	-0.553521	1.24807e-131	5.42085e-127	0.35	0.581	ribosomal protein S4 Y-linked 1 [Source:HGNC Symbol;Acc:HGNC:10425]	GO:0000184(nuclear-transcribed mRNA catabolic process, nonsense-mediated decay);GO:0003723(RNA binding);GO:0003735(structural constituent of ribosome);GO:0005622(intracellular);GO:0005634(nucleus);GO:0005654(nucleoplasm);GO:0005829(cytosol);GO:0005840(ribosome);GO:0005844(polysome);GO:0006412(translation);GO:0006413(translational initiation);GO:0006614(SRP-dependent cotranslational protein target…	03010(Ribosome)	down
ENSG00000151914	DST	-0.599224	1.40421e-131	6.09903e-127	0.128	0.309	dystonin [Source:HGNC Symbol;Acc:HGNC:1090]	GO:0002162(dystroglycan binding);GO:0003779(actin binding);GO:0005178(integrin binding);GO:0005198(structural molecule activity);GO:0005509(calcium ion binding);GO:0005515(protein binding);GO:0005604(basement membrane);GO:0005634(nucleus);GO:0005635(nuclear envelope);GO:0005737(cytoplasm);GO:0005783(endoplasmic reticulum);GO:0005789(endoplasmic reticulum membrane);GO:0005829(cytosol);GO:0005856(c…	NA	down
ENSG00000185862	EVI2B	-0.601525	1.48462e-131	6.44829e-127	0.408	0.606	ecotropic viral integration site 2B [Source:HGNC Symbol;Acc:HGNC:3500]	GO:0005887(integral component of plasma membrane);GO:0016020(membrane);GO:0016021(integral component of membrane);GO:0030854(positive regulation of granulocyte differentiation);GO:0043066(negative regulation of apoptotic process);GO:0045660(positive regulation of neutrophil differentiation);GO:0061515(myeloid cell development);GO:0071157(negative regulation of cell cycle arrest);GO:2000035(regula…	NA	down
ENSG00000168906	MAT2A	-0.600001	3.10087e-131	1.34683e-126	0.299	0.5	methionine adenosyltransferase 2A [Source:HGNC Symbol;Acc:HGNC:6904]	GO:0000166(nucleotide binding);GO:0004478(methionine adenosyltransferase activity);GO:0005515(protein binding);GO:0005524(ATP binding);GO:0005829(cytosol);GO:0006556(S-adenosylmethionine biosynthetic process);GO:0006730(one-carbon metabolic process);GO:0016740(transferase activity);GO:0032259(methylation);GO:0034214(protein hexamerization);GO:0042802(identical protein binding);GO:0046872(metal io…	00270(Cysteine and methionine metabolism)	down
ENSG00000091527	CDV3	0.547671	6.83631e-131	2.96928e-126	0.704	0.574	CDV3 homolog [Source:HGNC Symbol;Acc:HGNC:26928]	GO:0003674(molecular_function);GO:0005737(cytoplasm);GO:0005829(cytosol);GO:0005886(plasma membrane);GO:0008283(cell population proliferation)	NA	up
ENSG00000132963	POMP	0.58448	6.92728e-131	3.00879e-126	0.624	0.455	proteasome maturation protein [Source:HGNC Symbol;Acc:HGNC:20330]	GO:0005515(protein binding);GO:0005634(nucleus);GO:0005737(cytoplasm);GO:0005783(endoplasmic reticulum);GO:0005829(cytosol);GO:0016020(membrane);GO:0016607(nuclear speck);GO:0031090(organelle membrane);GO:0043231(intracellular membrane-bounded organelle);GO:0043248(proteasome assembly)	03050(Proteasome)	up
ENSG00000163399	ATP1A1	0.636716	1.11165e-130	4.82833e-126	0.638	0.468	ATPase Na+/K+ transporting subunit alpha 1 [Source:HGNC Symbol;Acc:HGNC:799]	GO:0000166(nucleotide binding);GO:0002026(regulation of the force of heart contraction);GO:0002028(regulation of sodium ion transport);GO:0005391(sodium:potassium-exchanging ATPase activity);GO:0005515(protein binding);GO:0005524(ATP binding);GO:0005768(endosome);GO:0005783(endoplasmic reticulum);GO:0005794(Golgi apparatus);GO:0005886(plasma membrane);GO:0005890(sodium:potassium-exchanging ATPase…	04022(cGMP-PKG signaling pathway);04024(cAMP signaling pathway);04260(Cardiac muscle contraction);04261(Adrenergic signaling in cardiomyocytes);04911(Insulin secretion);04918(Thyroid hormone synthesis);04919(Thyroid hormone signaling pathway);04925(Aldosterone synthesis and secretion);04960(Aldosterone-regulated sodium reabsorption);04961(Endocrine and other factor-regulated calcium reabsorption)…	up
ENSG00000156127	BATF	0.535608	1.48677e-130	6.45763e-126	0.203	0.046	basic leucine zipper ATF-like transcription factor [Source:HGNC Symbol;Acc:HGNC:958]	GO:0000978(RNA polymerase II proximal promoter sequence-specific DNA binding);GO:0000981(DNA-binding transcription factor activity, RNA polymerase II-specific);GO:0001228(DNA-binding transcription activator activity, RNA polymerase II-specific);GO:0001816(cytokine production);GO:0002320(lymphoid progenitor cell differentiation);GO:0003677(DNA binding);GO:0003700(DNA-binding transcription factor a…	NA	up
ENSG00000152492	CCDC50	-0.507969	2.18011e-130	9.46909e-126	0.101	0.267	coiled-coil domain containing 50 [Source:HGNC Symbol;Acc:HGNC:18111]	GO:0005515(protein binding);GO:0005737(cytoplasm);GO:0005829(cytosol);GO:0007605(sensory perception of sound);GO:0031625(ubiquitin protein ligase binding)	NA	down
ENSG00000072364	AFF4	-0.611895	6.14822e-130	2.67042e-125	0.391	0.575	AF4/FMR2 family member 4 [Source:HGNC Symbol;Acc:HGNC:17869]	GO:0001650(fibrillar center);GO:0003690(double-stranded DNA binding);GO:0003700(DNA-binding transcription factor activity);GO:0005515(protein binding);GO:0005634(nucleus);GO:0005654(nucleoplasm);GO:0006355(regulation of transcription, DNA-templated);GO:0006366(transcription by RNA polymerase II);GO:0006368(transcription elongation from RNA polymerase II promoter);GO:0007286(spermatid development)…	NA	down
ENSG00000137478	FCHSD2	-0.484447	8.90735e-130	3.86882e-125	0.083	0.247	FCH and double SH3 domains 2 [Source:HGNC Symbol;Acc:HGNC:29114]	GO:0005515(protein binding);GO:0005547(phosphatidylinositol-3,4,5-trisphosphate binding);GO:0005737(cytoplasm);GO:0005886(plasma membrane);GO:0005905(clathrin-coated pit);GO:0006897(endocytosis);GO:0007274(neuromuscular synaptic transmission);GO:0008289(lipid binding);GO:0015031(protein transport);GO:0016020(membrane);GO:0030054(cell junction);GO:0030833(regulation of actin filament polymerizatio…	NA	down
ENSG00000130522	JUND	-0.522202	1.3572e-129	5.89487e-125	0.829	0.895	JunD proto-oncogene, AP-1 transcription factor subunit [Source:HGNC Symbol;Acc:HGNC:6206]	GO:0000122(negative regulation of transcription by RNA polymerase II);GO:0000785(chromatin);GO:0000790(nuclear chromatin);GO:0000978(RNA polymerase II proximal promoter sequence-specific DNA binding);GO:0000981(DNA-binding transcription factor activity, RNA polymerase II-specific);GO:0001228(DNA-binding transcription activator activity, RNA polymerase II-specific);GO:0002076(osteoblast developmen…	04010(MAPK signaling pathway);04380(Osteoclast differentiation);04657(IL-17 signaling pathway);04928(Parathyroid hormone synthesis, secretion and action)	down
ENSG00000055483	USP36	-0.631893	2.05119e-129	8.90912e-125	0.185	0.372	ubiquitin specific peptidase 36 [Source:HGNC Symbol;Acc:HGNC:20062]	GO:0003723(RNA binding);GO:0004197(cysteine-type endopeptidase activity);GO:0004843(thiol-dependent ubiquitin-specific protease activity);GO:0005515(protein binding);GO:0005634(nucleus);GO:0005730(nucleolus);GO:0005737(cytoplasm);GO:0006508(proteolysis);GO:0006511(ubiquitin-dependent protein catabolic process);GO:0007000(nucleolus organization);GO:0008233(peptidase activity);GO:0008234(cysteine-t…	NA	down
ENSG00000100911	PSME2	0.622757	4.64793e-129	2.01878e-124	0.386	0.18	proteasome activator subunit 2 [Source:HGNC Symbol;Acc:HGNC:9569]	GO:0000165(MAPK cascade);GO:0000209(protein polyubiquitination);GO:0000502(proteasome complex);GO:0002223(stimulatory C-type lectin receptor signaling pathway);GO:0002479(antigen processing and presentation of exogenous peptide antigen via MHC class I, TAP-dependent);GO:0005515(protein binding);GO:0005654(nucleoplasm);GO:0005737(cytoplasm);GO:0005829(cytosol);GO:0006521(regulation of cellular ami…	03050(Proteasome);04612(Antigen processing and presentation)	up
ENSG00000071967	CYBRD1	-0.409559	2.46841e-128	1.07213e-123	0.052	0.191	cytochrome b reductase 1 [Source:HGNC Symbol;Acc:HGNC:20797]	GO:0000293(ferric-chelate reductase activity);GO:0005515(protein binding);GO:0005765(lysosomal membrane);GO:0005886(plasma membrane);GO:0006879(cellular iron ion homeostasis);GO:0010039(response to iron ion);GO:0016020(membrane);GO:0016021(integral component of membrane);GO:0016491(oxidoreductase activity);GO:0031526(brush border membrane);GO:0046872(metal ion binding);GO:0055114(oxidation-reduct…	04978(Mineral absorption)	down
ENSG00000104131	EIF3J	0.668344	2.96693e-128	1.28866e-123	0.466	0.284	eukaryotic translation initiation factor 3 subunit J [Source:HGNC Symbol;Acc:HGNC:3270]	GO:0001732(formation of cytoplasmic translation initiation complex);GO:0002183(cytoplasmic translational initiation);GO:0003743(translation initiation factor activity);GO:0005515(protein binding);GO:0005737(cytoplasm);GO:0005829(cytosol);GO:0005852(eukaryotic translation initiation factor 3 complex);GO:0006412(translation);GO:0006413(translational initiation);GO:0016282(eukaryotic 43S preinitiati…	03013(RNA transport)	up
ENSG00000167470	MIDN	-0.577507	5.04684e-128	2.19205e-123	0.51	0.673	midnolin [Source:HGNC Symbol;Acc:HGNC:16298]	GO:0003674(molecular_function);GO:0005515(protein binding);GO:0005634(nucleus);GO:0005730(nucleolus);GO:0005737(cytoplasm);GO:0005829(cytosol);GO:0008150(biological_process);GO:0019900(kinase binding);GO:0033132(negative regulation of glucokinase activity);GO:0046676(negative regulation of insulin secretion)	NA	down
ENSG00000099783	HNRNPM	0.617493	1.08381e-127	4.7074e-123	0.474	0.279	heterogeneous nuclear ribonucleoprotein M [Source:HGNC Symbol;Acc:HGNC:5046]	GO:0000380(alternative mRNA splicing, via spliceosome);GO:0000398(mRNA splicing, via spliceosome);GO:0003676(nucleic acid binding);GO:0003723(RNA binding);GO:0003729(mRNA binding);GO:0005515(protein binding);GO:0005634(nucleus);GO:0005654(nucleoplasm);GO:0005681(spliceosomal complex);GO:0005730(nucleolus);GO:0005737(cytoplasm);GO:0006397(mRNA processing);GO:0008380(RNA splicing);GO:0008543(fibrob…	03040(Spliceosome)	up
ENSG00000169902	TPST1	0.491748	1.25784e-127	5.46331e-123	0.182	0.036	tyrosylprotein sulfotransferase 1 [Source:HGNC Symbol;Acc:HGNC:12020]	GO:0000139(Golgi membrane);GO:0005794(Golgi apparatus);GO:0006478(peptidyl-tyrosine sulfation);GO:0006954(inflammatory response);GO:0008476(protein-tyrosine sulfotransferase activity);GO:0016020(membrane);GO:0016021(integral component of membrane);GO:0016740(transferase activity);GO:0030173(integral component of Golgi membrane);GO:0042803(protein homodimerization activity);GO:0050427(3'-phosphoad…	NA	up
ENSG00000167468	GPX4	0.567679	3.0711e-127	1.3339e-122	0.712	0.578	glutathione peroxidase 4 [Source:HGNC Symbol;Acc:HGNC:4556]	GO:0004601(peroxidase activity);GO:0004602(glutathione peroxidase activity);GO:0005515(protein binding);GO:0005634(nucleus);GO:0005635(nuclear envelope);GO:0005654(nucleoplasm);GO:0005737(cytoplasm);GO:0005739(mitochondrion);GO:0005829(cytosol);GO:0006325(chromatin organization);GO:0006644(phospholipid metabolic process);GO:0006749(glutathione metabolic process);GO:0006979(response to oxidative s…	00480(Glutathione metabolism);04216(Ferroptosis)	up
ENSG00000142937	RPS8	-0.427702	2.15349e-126	9.35349e-122	0.962	0.977	ribosomal protein S8 [Source:HGNC Symbol;Acc:HGNC:10441]	GO:0000184(nuclear-transcribed mRNA catabolic process, nonsense-mediated decay);GO:0000462(maturation of SSU-rRNA from tricistronic rRNA transcript (SSU-rRNA, 5.8S rRNA, LSU-rRNA));GO:0003723(RNA binding);GO:0003735(structural constituent of ribosome);GO:0005515(protein binding);GO:0005622(intracellular);GO:0005634(nucleus);GO:0005654(nucleoplasm);GO:0005737(cytoplasm);GO:0005783(endoplasmic reti…	03010(Ribosome)	down
ENSG00000186417	GLDN	-0.372811	2.72448e-126	1.18335e-121	0.044	0.166	gliomedin [Source:HGNC Symbol;Acc:HGNC:29514]	GO:0005576(extracellular region);GO:0005581(collagen trimer);GO:0005615(extracellular space);GO:0005886(plasma membrane);GO:0007275(multicellular organism development);GO:0007399(nervous system development);GO:0009986(cell surface);GO:0016020(membrane);GO:0016021(integral component of membrane);GO:0030154(cell differentiation);GO:0030424(axon);GO:0032528(microvillus organization);GO:0034113(heter…	NA	down
ENSG00000067048	DDX3Y	-0.609038	3.61569e-126	1.57044e-121	0.289	0.503	DEAD-box helicase 3 Y-linked [Source:HGNC Symbol;Acc:HGNC:2699]	GO:0000166(nucleotide binding);GO:0003676(nucleic acid binding);GO:0003677(DNA binding);GO:0003723(RNA binding);GO:0004386(helicase activity);GO:0005524(ATP binding);GO:0005634(nucleus);GO:0005737(cytoplasm);GO:0005829(cytosol);GO:0016020(membrane);GO:0016787(hydrolase activity)	NA	down
ENSG00000196814	MVB12B	-0.274832	4.55447e-126	1.97819e-121	0.011	0.099	multivesicular body subunit 12B [Source:HGNC Symbol;Acc:HGNC:23368]	GO:0000813(ESCRT I complex);GO:0005515(protein binding);GO:0005634(nucleus);GO:0005768(endosome);GO:0005769(early endosome);GO:0005770(late endosome);GO:0005829(cytosol);GO:0005886(plasma membrane);GO:0008289(lipid binding);GO:0010008(endosome membrane);GO:0015031(protein transport);GO:0016020(membrane);GO:0016197(endosomal transport);GO:0019058(viral life cycle);GO:0019075(virus maturation);GO:0…	04144(Endocytosis)	no_diff
ENSG00000164292	RHOBTB3	-0.478864	5.63728e-126	2.4485e-121	0.069	0.219	Rho related BTB domain containing 3 [Source:HGNC Symbol;Acc:HGNC:18757]	GO:0000166(nucleotide binding);GO:0003924(GTPase activity);GO:0005515(protein binding);GO:0005524(ATP binding);GO:0005525(GTP binding);GO:0005737(cytoplasm);GO:0005794(Golgi apparatus);GO:0005829(cytosol);GO:0005886(plasma membrane);GO:0005938(cell cortex);GO:0007015(actin filament organization);GO:0007163(establishment or maintenance of cell polarity);GO:0007266(Rho protein signal transduction);…	NA	down
ENSG00000150753	CCT5	0.626584	7.99886e-126	3.47422e-121	0.468	0.274	chaperonin containing TCP1 subunit 5 [Source:HGNC Symbol;Acc:HGNC:1618]	GO:0000166(nucleotide binding);GO:0003730(mRNA 3'-UTR binding);GO:0005515(protein binding);GO:0005524(ATP binding);GO:0005730(nucleolus);GO:0005737(cytoplasm);GO:0005813(centrosome);GO:0005815(microtubule organizing center);GO:0005829(cytosol);GO:0005832(chaperonin-containing T-complex);GO:0005856(cytoskeleton);GO:0005874(microtubule);GO:0006457(protein folding);GO:0007339(binding of sperm to zon…	NA	up
ENSG00000100234	TIMP3	-0.467203	1.48002e-125	6.42834e-121	0.04	0.165	TIMP metallopeptidase inhibitor 3 [Source:HGNC Symbol;Acc:HGNC:11822]	GO:0002020(protease binding);GO:0002576(platelet degranulation);GO:0004857(enzyme inhibitor activity);GO:0005515(protein binding);GO:0005576(extracellular region);GO:0005604(basement membrane);GO:0005615(extracellular space);GO:0005634(nucleus);GO:0007601(visual perception);GO:0008191(metalloendopeptidase inhibitor activity);GO:0009725(response to hormone);GO:0010033(response to organic substance…	05205(Proteoglycans in cancer);05206(MicroRNAs in cancer)	down
ENSG00000182566	CLEC4G	-0.37405	3.21417e-125	1.39604e-120	0.005	0.08	C-type lectin domain family 4 member G [Source:HGNC Symbol;Acc:HGNC:24591]	GO:0001618(virus receptor activity);GO:0002710(negative regulation of T cell mediated immunity);GO:0005515(protein binding);GO:0005886(plasma membrane);GO:0016020(membrane);GO:0016021(integral component of membrane);GO:0016032(viral process);GO:0030246(carbohydrate binding);GO:0030247(polysaccharide binding);GO:0042130(negative regulation of T cell proliferation);GO:0046718(viral entry into host …	NA	no_diff
ENSG00000147065	MSN	0.540432	5.80121e-125	2.5197e-120	0.699	0.564	moesin [Source:HGNC Symbol;Acc:HGNC:7373]	GO:0001771(immunological synapse formation);GO:0001931(uropod);GO:0003725(double-stranded RNA binding);GO:0003779(actin binding);GO:0005102(signaling receptor binding);GO:0005200(structural constituent of cytoskeleton);GO:0005515(protein binding);GO:0005615(extracellular space);GO:0005634(nucleus);GO:0005737(cytoplasm);GO:0005829(cytosol);GO:0005856(cytoskeleton);GO:0005886(plasma membrane);GO:00…	04530(Tight junction);04670(Leukocyte transendothelial migration);04810(Regulation of actin cytoskeleton);05162(Measles);05205(Proteoglycans in cancer)	up
ENSG00000002933	TMEM176A	-0.569146	9.21814e-125	4.00381e-120	0.105	0.279	transmembrane protein 176A [Source:HGNC Symbol;Acc:HGNC:24930]	GO:0016020(membrane);GO:0016021(integral component of membrane);GO:2001199(negative regulation of dendritic cell differentiation)	NA	down
ENSG00000125810	CD93	0.680026	1.36776e-124	5.94074e-120	0.623	0.446	CD93 molecule [Source:HGNC Symbol;Acc:HGNC:15855]	GO:0001849(complement component C1q binding);GO:0005509(calcium ion binding);GO:0005515(protein binding);GO:0005886(plasma membrane);GO:0006909(phagocytosis);GO:0007155(cell adhesion);GO:0009986(cell surface);GO:0016020(membrane);GO:0016021(integral component of membrane);GO:0016032(viral process);GO:0030246(carbohydrate binding);GO:0030667(secretory granule membrane);GO:0031410(cytoplasmic vesic…	NA	up
ENSG00000187239	FNBP1	-0.565189	2.18848e-124	9.50544e-120	0.34	0.536	formin binding protein 1 [Source:HGNC Symbol;Acc:HGNC:17069]	GO:0005515(protein binding);GO:0005737(cytoplasm);GO:0005764(lysosome);GO:0005829(cytosol);GO:0005856(cytoskeleton);GO:0005886(plasma membrane);GO:0005905(clathrin-coated pit);GO:0005938(cell cortex);GO:0006897(endocytosis);GO:0008289(lipid binding);GO:0016020(membrane);GO:0031410(cytoplasmic vesicle);GO:0042802(identical protein binding);GO:0061024(membrane organization)	NA	down
ENSG00000079950	STX7	-0.588536	3.35685e-124	1.45801e-119	0.223	0.417	syntaxin 7 [Source:HGNC Symbol;Acc:HGNC:11442]	GO:0000149(SNARE binding);GO:0001772(immunological synapse);GO:0001916(positive regulation of T cell mediated cytotoxicity);GO:0005484(SNAP receptor activity);GO:0005515(protein binding);GO:0005764(lysosome);GO:0005765(lysosomal membrane);GO:0005768(endosome);GO:0005769(early endosome);GO:0005770(late endosome);GO:0005886(plasma membrane);GO:0006886(intracellular protein transport);GO:0006906(ves…	04130(SNARE interactions in vesicular transport);04145(Phagosome)	down
ENSG00000108953	YWHAE	0.550594	4.94287e-124	2.14689e-119	0.625	0.481	tyrosine 3-monooxygenase/tryptophan 5-monooxygenase activation protein epsilon [Source:HGNC Symbol;Acc:HGNC:12851]	GO:0000086(G2/M transition of mitotic cell cycle);GO:0000165(MAPK cascade);GO:0001764(neuron migration);GO:0003064(regulation of heart rate by hormone);GO:0003723(RNA binding);GO:0005246(calcium channel regulator activity);GO:0005515(protein binding);GO:0005634(nucleus);GO:0005737(cytoplasm);GO:0005739(mitochondrion);GO:0005829(cytosol);GO:0005871(kinesin complex);GO:0005886(plasma membrane);GO:0…	04110(Cell cycle);04114(Oocyte meiosis);04151(PI3K-Akt signaling pathway);04390(Hippo signaling pathway);04722(Neurotrophin signaling pathway);05160(Hepatitis C);05203(Viral carcinogenesis)	up
ENSG00000165655	ZNF503	-0.600616	5.37986e-124	2.33669e-119	0.162	0.342	zinc finger protein 503 [Source:HGNC Symbol;Acc:HGNC:23589]	GO:0003676(nucleic acid binding);GO:0005634(nucleus);GO:0008285(negative regulation of cell population proliferation);GO:0010629(negative regulation of gene expression);GO:0046872(metal ion binding);GO:0061351(neural precursor cell proliferation);GO:0070315(G1 to G0 transition involved in cell differentiation)	NA	down
ENSG00000106153	CHCHD2	0.509036	8.41277e-124	3.654e-119	0.7	0.587	coiled-coil-helix-coiled-coil-helix domain containing 2 [Source:HGNC Symbol;Acc:HGNC:21645]	GO:0005515(protein binding);GO:0005634(nucleus);GO:0005739(mitochondrion);GO:0005758(mitochondrial intermembrane space);GO:0007005(mitochondrion organization);GO:0008134(transcription factor binding);GO:0043565(sequence-specific DNA binding);GO:0045944(positive regulation of transcription by RNA polymerase II);GO:1900037(regulation of cellular response to hypoxia)	NA	up
ENSG00000169499	PLEKHA2	-0.549556	1.49279e-123	6.48379e-119	0.208	0.405	pleckstrin homology domain containing A2 [Source:HGNC Symbol;Acc:HGNC:14336]	GO:0030165(PDZ domain binding);GO:0043325(phosphatidylinositol-3,4-bisphosphate binding)	NA	down
ENSG00000011422	PLAUR	0.663747	3.23984e-123	1.40719e-118	0.716	0.549	plasminogen activator, urokinase receptor [Source:HGNC Symbol;Acc:HGNC:9053]	GO:0001934(positive regulation of protein phosphorylation);GO:0005102(signaling receptor binding);GO:0005515(protein binding);GO:0005576(extracellular region);GO:0005788(endoplasmic reticulum lumen);GO:0005789(endoplasmic reticulum membrane);GO:0005886(plasma membrane);GO:0005887(integral component of plasma membrane);GO:0005925(focal adhesion);GO:0006935(chemotaxis);GO:0007165(signal transductio…	04610(Complement and coagulation cascades);05205(Proteoglycans in cancer)	up
ENSG00000104918	RETN	0.854793	3.39121e-123	1.47294e-118	0.39	0.343	resistin [Source:HGNC Symbol;Acc:HGNC:20389]	GO:0005179(hormone activity);GO:0005576(extracellular region);GO:0005615(extracellular space);GO:0005634(nucleus);GO:0007568(aging);GO:0008150(biological_process);GO:0009612(response to mechanical stimulus);GO:0010469(regulation of signaling receptor activity);GO:0032868(response to insulin);GO:0035578(azurophil granule lumen);GO:0035580(specific granule lumen);GO:0043312(neutrophil degranulation…	NA	up
ENSG00000141522	ARHGDIA	0.568794	4.19964e-123	1.82407e-118	0.642	0.501	Rho GDP dissociation inhibitor alpha [Source:HGNC Symbol;Acc:HGNC:678]	GO:0001772(immunological synapse);GO:0005094(Rho GDP-dissociation inhibitor activity);GO:0005096(GTPase activator activity);GO:0005504(fatty acid binding);GO:0005515(protein binding);GO:0005615(extracellular space);GO:0005634(nucleus);GO:0005737(cytoplasm);GO:0005829(cytosol);GO:0005856(cytoskeleton);GO:0007162(negative regulation of cell adhesion);GO:0007266(Rho protein signal transduction);GO:0…	04722(Neurotrophin signaling pathway);04962(Vasopressin-regulated water reabsorption)	up
ENSG00000164587	RPS14	-0.391978	5.24862e-123	2.27969e-118	0.966	0.976	ribosomal protein S14 [Source:HGNC Symbol;Acc:HGNC:10387]	GO:0000028(ribosomal small subunit assembly);GO:0000122(negative regulation of transcription by RNA polymerase II);GO:0000184(nuclear-transcribed mRNA catabolic process, nonsense-mediated decay);GO:0000462(maturation of SSU-rRNA from tricistronic rRNA transcript (SSU-rRNA, 5.8S rRNA, LSU-rRNA));GO:0003723(RNA binding);GO:0003735(structural constituent of ribosome);GO:0005515(protein binding);GO:0…	03010(Ribosome)	down
ENSG00000168918	INPP5D	-0.505509	1.14747e-122	4.98393e-118	0.136	0.319	inositol polyphosphate-5-phosphatase D [Source:HGNC Symbol;Acc:HGNC:6079]	GO:0002376(immune system process);GO:0004445(inositol-polyphosphate 5-phosphatase activity);GO:0005515(protein binding);GO:0005737(cytoplasm);GO:0005829(cytosol);GO:0005856(cytoskeleton);GO:0005886(plasma membrane);GO:0006661(phosphatidylinositol biosynthetic process);GO:0006796(phosphate-containing compound metabolic process);GO:0006915(apoptotic process);GO:0007165(signal transduction);GO:00083…	00562(Inositol phosphate metabolism);04070(Phosphatidylinositol signaling system);04662(B cell receptor signaling pathway);04664(Fc epsilon RI signaling pathway);04666(Fc gamma R-mediated phagocytosis)	down
ENSG00000170458	CD14	0.57978	2.98915e-122	1.29831e-117	0.843	0.795	CD14 molecule [Source:HGNC Symbol;Acc:HGNC:1628]	GO:0001530(lipopolysaccharide binding);GO:0001847(opsonin receptor activity);GO:0002224(toll-like receptor signaling pathway);GO:0002237(response to molecule of bacterial origin);GO:0002376(immune system process);GO:0002755(MyD88-dependent toll-like receptor signaling pathway);GO:0002756(MyD88-independent toll-like receptor signaling pathway);GO:0005515(protein binding);GO:0005576(extracellular r…	04010(MAPK signaling pathway);04064(NF-kappa B signaling pathway);04145(Phagosome);04620(Toll-like receptor signaling pathway);04640(Hematopoietic cell lineage);05130(Pathogenic Escherichia coli infection);05132(Salmonella infection);05133(Pertussis);05134(Legionellosis);05146(Amoebiasis);05152(Tuberculosis);05202(Transcriptional misregulation in cancer);05221(Acute myeloid leukemia)	up
ENSG00000119865	CNRIP1	-0.433172	8.31693e-122	3.61238e-117	0.049	0.176	cannabinoid receptor interacting protein 1 [Source:HGNC Symbol;Acc:HGNC:24546]	GO:0005737(cytoplasm);GO:0005886(plasma membrane);GO:0008022(protein C-terminus binding);GO:0031718(type 1 cannabinoid receptor binding)	NA	down
ENSG00000115112	TFCP2L1	-0.299163	9.03338e-122	3.92356e-117	0.012	0.099	transcription factor CP2 like 1 [Source:HGNC Symbol;Acc:HGNC:17925]	GO:0000122(negative regulation of transcription by RNA polymerase II);GO:0000902(cell morphogenesis);GO:0000977(RNA polymerase II regulatory region sequence-specific DNA binding);GO:0000981(DNA-binding transcription factor activity, RNA polymerase II-specific);GO:0001650(fibrillar center);GO:0002070(epithelial cell maturation);GO:0003677(DNA binding);GO:0003700(DNA-binding transcription factor ac…	NA	no_diff
ENSG00000109906	ZBTB16	-0.439724	1.0114e-121	4.39293e-117	0.089	0.248	zinc finger and BTB domain containing 16 [Source:HGNC Symbol;Acc:HGNC:12930]	GO:0000122(negative regulation of transcription by RNA polymerase II);GO:0000980(RNA polymerase II distal enhancer sequence-specific DNA binding);GO:0000981(DNA-binding transcription factor activity, RNA polymerase II-specific);GO:0001227(DNA-binding transcription repressor activity, RNA polymerase II-specific);GO:0001501(skeletal system development);GO:0001823(mesonephros development);GO:0003676…	05200(Pathways in cancer);05202(Transcriptional misregulation in cancer);05221(Acute myeloid leukemia)	down
ENSG00000129226	CD68	-0.478208	1.32053e-121	5.73561e-117	0.073	0.224	CD68 molecule [Source:HGNC Symbol;Acc:HGNC:1693]	GO:0002437(inflammatory response to antigenic stimulus);GO:0002605(negative regulation of dendritic cell antigen processing and presentation);GO:0005623(cell);GO:0005764(lysosome);GO:0005765(lysosomal membrane);GO:0005768(endosome);GO:0005886(plasma membrane);GO:0007568(aging);GO:0010008(endosome membrane);GO:0016020(membrane);GO:0016021(integral component of membrane);GO:0031669(cellular respons…	04142(Lysosome)	down
ENSG00000112936	C7	-0.35417	2.82243e-121	1.22589e-116	0.017	0.113	complement C7 [Source:HGNC Symbol;Acc:HGNC:1346]	GO:0002376(immune system process);GO:0005515(protein binding);GO:0005576(extracellular region);GO:0005579(membrane attack complex);GO:0006883(cellular sodium ion homeostasis);GO:0006955(immune response);GO:0006956(complement activation);GO:0006957(complement activation, alternative pathway);GO:0006958(complement activation, classical pathway);GO:0019835(cytolysis);GO:0030449(regulation of complem…	04610(Complement and coagulation cascades);05020(Prion diseases);05322(Systemic lupus erythematosus)	down
ENSG00000179593	ALOX15B	-0.333703	2.91585e-121	1.26647e-116	0.018	0.118	arachidonate 15-lipoxygenase, type B [Source:HGNC Symbol;Acc:HGNC:434]	GO:0005506(iron ion binding);GO:0005509(calcium ion binding);GO:0005515(protein binding);GO:0005634(nucleus);GO:0005737(cytoplasm);GO:0005829(cytosol);GO:0005856(cytoskeleton);GO:0005886(plasma membrane);GO:0006629(lipid metabolic process);GO:0006915(apoptotic process);GO:0008285(negative regulation of cell population proliferation);GO:0008289(lipid binding);GO:0010744(positive regulation of macr…	00590(Arachidonic acid metabolism);04726(Serotonergic synapse)	down
ENSG00000100592	DAAM1	-0.495931	3.99123e-121	1.73355e-116	0.068	0.216	dishevelled associated activator of morphogenesis 1 [Source:HGNC Symbol;Acc:HGNC:18142]	GO:0001725(stress fiber);GO:0003779(actin binding);GO:0005515(protein binding);GO:0005737(cytoplasm);GO:0005829(cytosol);GO:0005856(cytoskeleton);GO:0005886(plasma membrane);GO:0016020(membrane);GO:0016043(cellular component organization);GO:0016055(Wnt signaling pathway);GO:0017048(Rho GTPase binding);GO:0030036(actin cytoskeleton organization);GO:0031514(motile cilium);GO:0036064(ciliary basal …	04310(Wnt signaling pathway)	down
ENSG00000104093	DMXL2	0.639102	5.61344e-121	2.43814e-116	0.509	0.333	Dmx like 2 [Source:HGNC Symbol;Acc:HGNC:2938]	GO:0005515(protein binding);GO:0005615(extracellular space);GO:0007035(vacuolar acidification);GO:0008021(synaptic vesicle);GO:0016020(membrane);GO:0017137(Rab GTPase binding);GO:0030054(cell junction);GO:0030672(synaptic vesicle membrane);GO:0031410(cytoplasmic vesicle);GO:0043291(RAVE complex);GO:0045202(synapse)	NA	up
ENSG00000160179	ABCG1	-0.465135	6.90896e-121	3.00084e-116	0.086	0.244	ATP binding cassette subfamily G member 1 [Source:HGNC Symbol;Acc:HGNC:73]	GO:0000139(Golgi membrane);GO:0000166(nucleotide binding);GO:0005524(ATP binding);GO:0005543(phospholipid binding);GO:0005548(phospholipid transporter activity);GO:0005623(cell);GO:0005739(mitochondrion);GO:0005768(endosome);GO:0005783(endoplasmic reticulum);GO:0005789(endoplasmic reticulum membrane);GO:0005794(Golgi apparatus);GO:0005886(plasma membrane);GO:0006355(regulation of transcription, D…	02010(ABC transporters)	down
ENSG00000183722	LHFPL6	-0.310936	8.15565e-121	3.54233e-116	0.015	0.108	LHFPL tetraspan subfamily member 6 [Source:HGNC Symbol;Acc:HGNC:6586]	GO:0016020(membrane);GO:0016021(integral component of membrane)	NA	down
ENSG00000144791	LIMD1	-0.447848	1.17766e-120	5.11504e-116	0.057	0.196	LIM domains containing 1 [Source:HGNC Symbol;Acc:HGNC:6612]	GO:0000932(P-body);GO:0001666(response to hypoxia);GO:0002076(osteoblast development);GO:0003714(transcription corepressor activity);GO:0005515(protein binding);GO:0005634(nucleus);GO:0005667(transcription factor complex);GO:0005737(cytoplasm);GO:0005829(cytosol);GO:0005886(plasma membrane);GO:0005911(cell-cell junction);GO:0005912(adherens junction);GO:0005925(focal adhesion);GO:0006355(regulati…	04390(Hippo signaling pathway);04392(Hippo signaling pathway - multiple species)	down
ENSG00000175130	MARCKSL1	0.641563	1.56873e-120	6.81361e-116	0.259	0.097	MARCKS like 1 [Source:HGNC Symbol;Acc:HGNC:7142]	GO:0003779(actin binding);GO:0005515(protein binding);GO:0005516(calmodulin binding);GO:0005737(cytoplasm);GO:0005856(cytoskeleton);GO:0005886(plasma membrane);GO:0008284(positive regulation of cell population proliferation);GO:0016020(membrane);GO:0070062(extracellular exosome)	04666(Fc gamma R-mediated phagocytosis);05140(Leishmaniasis)	up
ENSG00000115355	CCDC88A	-0.532427	1.61677e-120	7.02226e-116	0.64	0.779	coiled-coil domain containing 88A [Source:HGNC Symbol;Acc:HGNC:25523]	GO:0001932(regulation of protein phosphorylation);GO:0003779(actin binding);GO:0005515(protein binding);GO:0005737(cytoplasm);GO:0005783(endoplasmic reticulum);GO:0005794(Golgi apparatus);GO:0005813(centrosome);GO:0005814(centriole);GO:0005829(cytosol);GO:0005856(cytoskeleton);GO:0005886(plasma membrane);GO:0006260(DNA replication);GO:0006275(regulation of DNA replication);GO:0007399(nervous syst…	NA	down
ENSG00000280721	LINC01943	0.377156	1.73327e-120	7.52829e-116	0.116	0.007	long intergenic non-protein coding RNA 1943 [Source:HGNC Symbol;Acc:HGNC:52767]	NA	NA	up
ENSG00000185650	ZFP36L1	-0.449509	2.29767e-120	9.97972e-116	0.838	0.922	ZFP36 ring finger protein like 1 [Source:HGNC Symbol;Acc:HGNC:1107]	GO:0000165(MAPK cascade);GO:0000288(nuclear-transcribed mRNA catabolic process, deadenylation-dependent decay);GO:0000932(P-body);GO:0000981(DNA-binding transcription factor activity, RNA polymerase II-specific);GO:0001570(vasculogenesis);GO:0003342(proepicardium development);GO:0003677(DNA binding);GO:0003700(DNA-binding transcription factor activity);GO:0003723(RNA binding);GO:0003729(mRNA bind…	04218(Cellular senescence)	down
ENSG00000163710	PCOLCE2	0.488159	2.35716e-120	1.02381e-115	0.144	0.018	procollagen C-endopeptidase enhancer 2 [Source:HGNC Symbol;Acc:HGNC:8739]	GO:0005515(protein binding);GO:0005518(collagen binding);GO:0005576(extracellular region);GO:0008201(heparin binding);GO:0010952(positive regulation of peptidase activity);GO:0016504(peptidase activator activity);GO:1990830(cellular response to leukemia inhibitory factor)	NA	up
ENSG00000142875	PRKACB	-0.474569	2.41873e-120	1.05055e-115	0.081	0.232	protein kinase cAMP-activated catalytic subunit beta [Source:HGNC Symbol;Acc:HGNC:9381]	GO:0000166(nucleotide binding);GO:0000287(magnesium ion binding);GO:0001843(neural tube closure);GO:0002223(stimulatory C-type lectin receptor signaling pathway);GO:0003091(renal water homeostasis);GO:0004672(protein kinase activity);GO:0004674(protein serine/threonine kinase activity);GO:0004691(cAMP-dependent protein kinase activity);GO:0005515(protein binding);GO:0005524(ATP binding);GO:000563…	01522(Endocrine resistance);04010(MAPK signaling pathway);04014(Ras signaling pathway);04020(Calcium signaling pathway);04024(cAMP signaling pathway);04062(Chemokine signaling pathway);04114(Oocyte meiosis);04140(Autophagy - animal);04211(Longevity regulating pathway);04213(Longevity regulating pathway - multiple species);04261(Adrenergic signaling in cardiomyocytes);04270(Vascular smooth muscle …	down
ENSG00000149311	ATM	-0.549508	1.99829e-119	8.67939e-115	0.234	0.437	ATM serine/threonine kinase [Source:HGNC Symbol;Acc:HGNC:795]	GO:0000077(DNA damage checkpoint);GO:0000166(nucleotide binding);GO:0000723(telomere maintenance);GO:0000724(double-strand break repair via homologous recombination);GO:0000729(DNA double-strand break processing);GO:0000781(chromosome, telomeric region);GO:0000784(nuclear chromosome, telomeric region);GO:0001541(ovarian follicle development);GO:0001666(response to hypoxia);GO:0001756(somitogenesi…	01524(Platinum drug resistance);03440(Homologous recombination);04064(NF-kappa B signaling pathway);04068(FoxO signaling pathway);04110(Cell cycle);04115(p53 signaling pathway);04210(Apoptosis);04218(Cellular senescence);05165(Human papillomavirus infection);05166(Human T-cell leukemia virus 1 infection);05170(Human immunodeficiency virus 1 infection);05202(Transcriptional misregulation in cancer…	down
ENSG00000095585	BLNK	-0.317398	3.40587e-119	1.4793e-114	0.021	0.122	B cell linker [Source:HGNC Symbol;Acc:HGNC:14211]	GO:0005068(transmembrane receptor protein tyrosine kinase adaptor activity);GO:0005070(SH3/SH2 adaptor activity);GO:0005515(protein binding);GO:0005737(cytoplasm);GO:0005829(cytosol);GO:0005886(plasma membrane);GO:0006954(inflammatory response);GO:0006959(humoral immune response);GO:0007169(transmembrane receptor protein tyrosine kinase signaling pathway);GO:0009967(positive regulation of signal …	04064(NF-kappa B signaling pathway);04380(Osteoclast differentiation);04662(B cell receptor signaling pathway);05169(Epstein-Barr virus infection);05340(Primary immunodeficiency)	down
ENSG00000103363	ELOB	0.50733	4.37826e-119	1.90165e-114	0.73	0.615	elongin B [Source:HGNC Symbol;Acc:HGNC:11619]	GO:0003746(translation elongation factor activity);GO:0005515(protein binding);GO:0005634(nucleus);GO:0005654(nucleoplasm);GO:0005829(cytosol);GO:0006366(transcription by RNA polymerase II);GO:0006368(transcription elongation from RNA polymerase II promoter);GO:0006414(translational elongation);GO:0016567(protein ubiquitination);GO:0030891(VCB complex);GO:0031462(Cul2-RING ubiquitin ligase comple…	04066(HIF-1 signaling pathway);04120(Ubiquitin mediated proteolysis);05170(Human immunodeficiency virus 1 infection);05200(Pathways in cancer);05211(Renal cell carcinoma)	up
ENSG00000139343	SNRPF	0.598014	4.63037e-119	2.01115e-114	0.386	0.195	small nuclear ribonucleoprotein polypeptide F [Source:HGNC Symbol;Acc:HGNC:11162]	GO:0000387(spliceosomal snRNP assembly);GO:0000398(mRNA splicing, via spliceosome);GO:0003723(RNA binding);GO:0005515(protein binding);GO:0005634(nucleus);GO:0005654(nucleoplasm);GO:0005681(spliceosomal complex);GO:0005683(U7 snRNP);GO:0005685(U1 snRNP);GO:0005687(U4 snRNP);GO:0005689(U12-type spliceosomal complex);GO:0005732(small nucleolar ribonucleoprotein complex);GO:0005737(cytoplasm);GO:000…	03040(Spliceosome)	up
ENSG00000005059	MCUB	0.595399	4.71094e-119	2.04615e-114	0.397	0.21	mitochondrial calcium uniporter dominant negative beta subunit [Source:HGNC Symbol;Acc:HGNC:26076]	GO:0005739(mitochondrion);GO:0005743(mitochondrial inner membrane);GO:0006811(ion transport);GO:0006816(calcium ion transport);GO:0006851(mitochondrial calcium ion transmembrane transport);GO:0016020(membrane);GO:0016021(integral component of membrane);GO:0019855(calcium channel inhibitor activity);GO:0031224(intrinsic component of membrane);GO:0031305(integral component of mitochondrial inner me…	NA	up
ENSG00000185624	P4HB	0.537321	4.71169e-119	2.04648e-114	0.664	0.556	prolyl 4-hydroxylase subunit beta [Source:HGNC Symbol;Acc:HGNC:8548]	GO:0003723(RNA binding);GO:0003756(protein disulfide isomerase activity);GO:0004656(procollagen-proline 4-dioxygenase activity);GO:0005178(integrin binding);GO:0005515(protein binding);GO:0005576(extracellular region);GO:0005623(cell);GO:0005783(endoplasmic reticulum);GO:0005788(endoplasmic reticulum lumen);GO:0005793(endoplasmic reticulum-Golgi intermediate compartment);GO:0005886(plasma membran…	04141(Protein processing in endoplasmic reticulum)	up
ENSG00000262061	AC129507.1	-0.224043	4.92892e-119	2.14083e-114	0.001	0.062	uncharacterized LOC100506388 [Source:NCBI gene;Acc:100506388]	NA	NA	no_diff
ENSG00000254415	SIGLEC14	0.308971	7.67189e-119	3.33221e-114	0.102	0.003	sialic acid binding Ig like lectin 14 [Source:HGNC Symbol;Acc:HGNC:32926]	GO:0005886(plasma membrane);GO:0007155(cell adhesion);GO:0016020(membrane);GO:0016021(integral component of membrane);GO:0030246(carbohydrate binding);GO:0043312(neutrophil degranulation);GO:0045087(innate immune response);GO:0070821(tertiary granule membrane);GO:0101003(ficolin-1-rich granule membrane)	NA	up
ENSG00000100596	SPTLC2	-0.512747	7.87645e-119	3.42106e-114	0.172	0.361	serine palmitoyltransferase long chain base subunit 2 [Source:HGNC Symbol;Acc:HGNC:11278]	GO:0003824(catalytic activity);GO:0004758(serine C-palmitoyltransferase activity);GO:0005783(endoplasmic reticulum);GO:0005789(endoplasmic reticulum membrane);GO:0006629(lipid metabolic process);GO:0006665(sphingolipid metabolic process);GO:0006686(sphingomyelin biosynthetic process);GO:0009058(biosynthetic process);GO:0016020(membrane);GO:0016021(integral component of membrane);GO:0016740(transf…	00600(Sphingolipid metabolism);04071(Sphingolipid signaling pathway)	down
ENSG00000197111	PCBP2	-0.491679	1.03063e-118	4.47645e-114	0.589	0.735	poly(rC) binding protein 2 [Source:HGNC Symbol;Acc:HGNC:8648]	GO:0000398(mRNA splicing, via spliceosome);GO:0002376(immune system process);GO:0003676(nucleic acid binding);GO:0003677(DNA binding);GO:0003723(RNA binding);GO:0005515(protein binding);GO:0005634(nucleus);GO:0005654(nucleoplasm);GO:0005737(cytoplasm);GO:0005829(cytosol);GO:0005925(focal adhesion);GO:0014069(postsynaptic density);GO:0016020(membrane);GO:0016070(RNA metabolic process);GO:0016071(m…	04216(Ferroptosis)	down
ENSG00000198363	ASPH	0.631602	1.96771e-118	8.54653e-114	0.441	0.262	aspartate beta-hydroxylase [Source:HGNC Symbol;Acc:HGNC:757]	GO:0004597(peptide-aspartate beta-dioxygenase activity);GO:0005198(structural molecule activity);GO:0005509(calcium ion binding);GO:0005515(protein binding);GO:0005737(cytoplasm);GO:0005783(endoplasmic reticulum);GO:0005789(endoplasmic reticulum membrane);GO:0005886(plasma membrane);GO:0006936(muscle contraction);GO:0007389(pattern specification process);GO:0008285(negative regulation of cell pop…	NA	up
ENSG00000105323	HNRNPUL1	-0.579711	2.029e-118	8.81275e-114	0.319	0.504	heterogeneous nuclear ribonucleoprotein U like 1 [Source:HGNC Symbol;Acc:HGNC:17011]	GO:0000398(mRNA splicing, via spliceosome);GO:0003723(RNA binding);GO:0005515(protein binding);GO:0005634(nucleus);GO:0005654(nucleoplasm);GO:0006396(RNA processing);GO:0009615(response to virus);GO:0019899(enzyme binding)	05164(Influenza A)	down
ENSG00000266412	NCOA4	-0.549707	2.99153e-118	1.29934e-113	0.387	0.582	nuclear receptor coactivator 4 [Source:HGNC Symbol;Acc:HGNC:7671]	GO:0003713(transcription coactivator activity);GO:0005623(cell);GO:0005634(nucleus);GO:0006622(protein targeting to lysosome);GO:0006879(cellular iron ion homeostasis);GO:0008584(male gonad development);GO:0009725(response to hormone);GO:0030521(androgen receptor signaling pathway);GO:0044754(autolysosome);GO:0045893(positive regulation of transcription, DNA-templated);GO:0050681(androgen recepto…	04216(Ferroptosis);05200(Pathways in cancer);05216(Thyroid cancer)	down
ENSG00000157557	ETS2	0.574607	3.26459e-118	1.41794e-113	0.662	0.557	ETS proto-oncogene 2, transcription factor [Source:HGNC Symbol;Acc:HGNC:3489]	GO:0000122(negative regulation of transcription by RNA polymerase II);GO:0000977(RNA polymerase II regulatory region sequence-specific DNA binding);GO:0000978(RNA polymerase II proximal promoter sequence-specific DNA binding);GO:0000981(DNA-binding transcription factor activity, RNA polymerase II-specific);GO:0001227(DNA-binding transcription repressor activity, RNA polymerase II-specific);GO:000…	04014(Ras signaling pathway);05166(Human T-cell leukemia virus 1 infection)	up
ENSG00000108932	SLC16A6	0.635457	7.83599e-118	3.40348e-113	0.208	0.056	solute carrier family 16 member 6 [Source:HGNC Symbol;Acc:HGNC:10927]	GO:0005886(plasma membrane);GO:0005887(integral component of plasma membrane);GO:0008028(monocarboxylic acid transmembrane transporter activity);GO:0015293(symporter activity);GO:0015718(monocarboxylic acid transport);GO:0016020(membrane);GO:0016021(integral component of membrane);GO:0055085(transmembrane transport)	NA	up
ENSG00000112695	COX7A2	0.57878	9.10114e-118	3.95299e-113	0.571	0.394	cytochrome c oxidase subunit 7A2 [Source:HGNC Symbol;Acc:HGNC:2288]	GO:0004129(cytochrome-c oxidase activity);GO:0005746(mitochondrial respirasome);GO:0009055(electron transfer activity);GO:0016020(membrane);GO:0016021(integral component of membrane);GO:0022900(electron transport chain);GO:1902600(proton transmembrane transport)	00190(Oxidative phosphorylation);04260(Cardiac muscle contraction);04714(Thermogenesis);04932(Non-alcoholic fatty liver disease (NAFLD));05010(Alzheimer disease);05012(Parkinson disease);05016(Huntington disease)	up
ENSG00000177000	MTHFR	-0.487095	1.89259e-117	8.22027e-113	0.124	0.297	methylenetetrahydrofolate reductase [Source:HGNC Symbol;Acc:HGNC:7436]	GO:0001666(response to hypoxia);GO:0001843(neural tube closure);GO:0003824(catalytic activity);GO:0004489(methylenetetrahydrofolate reductase (NAD(P)H) activity);GO:0005829(cytosol);GO:0006520(cellular amino acid metabolic process);GO:0006555(methionine metabolic process);GO:0006730(one-carbon metabolic process);GO:0008015(blood circulation);GO:0008152(metabolic process);GO:0009086(methionine bio…	00670(One carbon pool by folate);01523(Antifolate resistance)	down
ENSG00000128016	ZFP36	-0.563401	3.23643e-117	1.40571e-112	0.6	0.731	ZFP36 ring finger protein [Source:NCBI gene;Acc:7538]	GO:0000122(negative regulation of transcription by RNA polymerase II);GO:0000165(MAPK cascade);GO:0000288(nuclear-transcribed mRNA catabolic process, deadenylation-dependent decay);GO:0000289(nuclear-transcribed mRNA poly(A) tail shortening);GO:0000932(P-body);GO:0003677(DNA binding);GO:0003723(RNA binding);GO:0003727(single-stranded RNA binding);GO:0003729(mRNA binding);GO:0003730(mRNA 3'-UTR bi…	05166(Human T-cell leukemia virus 1 infection);05167(Kaposi sarcoma-associated herpesvirus infection)	down
ENSG00000197405	C5AR1	0.521473	5.40667e-117	2.34833e-112	0.854	0.744	complement C5a receptor 1 [Source:HGNC Symbol;Acc:HGNC:1338]	GO:0000187(activation of MAPK activity);GO:0001856(complement component C5a binding);GO:0002430(complement receptor mediated signaling pathway);GO:0004875(complement receptor activity);GO:0004878(complement component C5a receptor activity);GO:0004930(G protein-coupled receptor activity);GO:0005886(plasma membrane);GO:0005887(integral component of plasma membrane);GO:0006915(apoptotic process);GO:…	04080(Neuroactive ligand-receptor interaction);04610(Complement and coagulation cascades);05150(Staphylococcus aureus infection)	up
ENSG00000186469	GNG2	-0.514616	8.93304e-117	3.87998e-112	0.129	0.304	G protein subunit gamma 2 [Source:HGNC Symbol;Acc:HGNC:4404]	GO:0003924(GTPase activity);GO:0005515(protein binding);GO:0005834(heterotrimeric G-protein complex);GO:0005886(plasma membrane);GO:0006457(protein folding);GO:0007165(signal transduction);GO:0007186(G protein-coupled receptor signaling pathway);GO:0007191(adenylate cyclase-activating dopamine receptor signaling pathway);GO:0007223(Wnt signaling pathway, calcium modulating pathway);GO:0008283(cel…	04014(Ras signaling pathway);04062(Chemokine signaling pathway);04151(PI3K-Akt signaling pathway);04371(Apelin signaling pathway);04713(Circadian entrainment);04723(Retrograde endocannabinoid signaling);04724(Glutamatergic synapse);04725(Cholinergic synapse);04726(Serotonergic synapse);04727(GABAergic synapse);04728(Dopaminergic synapse);04926(Relaxin signaling pathway);05032(Morphine addiction);…	down
ENSG00000067900	ROCK1	-0.498628	2.38193e-116	1.03457e-111	0.603	0.756	Rho associated coiled-coil containing protein kinase 1 [Source:HGNC Symbol;Acc:HGNC:10251]	GO:0000139(Golgi membrane);GO:0000166(nucleotide binding);GO:0001726(ruffle);GO:0003180(aortic valve morphogenesis);GO:0003383(apical constriction);GO:0004672(protein kinase activity);GO:0004674(protein serine/threonine kinase activity);GO:0005515(protein binding);GO:0005524(ATP binding);GO:0005576(extracellular region);GO:0005737(cytoplasm);GO:0005794(Golgi apparatus);GO:0005814(centriole);GO:00…	04022(cGMP-PKG signaling pathway);04024(cAMP signaling pathway);04062(Chemokine signaling pathway);04071(Sphingolipid signaling pathway);04270(Vascular smooth muscle contraction);04350(TGF-beta signaling pathway);04360(Axon guidance);04510(Focal adhesion);04530(Tight junction);04611(Platelet activation);04670(Leukocyte transendothelial migration);04810(Regulation of actin cytoskeleton);04921(Oxyt…	down
ENSG00000155849	ELMO1	-0.451881	3.04602e-116	1.32301e-111	0.104	0.267	engulfment and cell motility 1 [Source:HGNC Symbol;Acc:HGNC:16286]	GO:0005085(guanyl-nucleotide exchange factor activity);GO:0005515(protein binding);GO:0005737(cytoplasm);GO:0005829(cytosol);GO:0005886(plasma membrane);GO:0006909(phagocytosis);GO:0006911(phagocytosis, engulfment);GO:0006915(apoptotic process);GO:0016020(membrane);GO:0016477(cell migration);GO:0016601(Rac protein signal transduction);GO:0017124(SH3 domain binding);GO:0030029(actin filament-based…	04062(Chemokine signaling pathway);05100(Bacterial invasion of epithelial cells);05131(Shigellosis)	down
ENSG00000176485	PLA2G16	-0.392373	8.14601e-116	3.53814e-111	0.046	0.171	phospholipase A2 group XVI [Source:HGNC Symbol;Acc:HGNC:17825]	GO:0004623(phospholipase A2 activity);GO:0005515(protein binding);GO:0005575(cellular_component);GO:0005737(cytoplasm);GO:0005777(peroxisome);GO:0005778(peroxisomal membrane);GO:0005783(endoplasmic reticulum);GO:0005829(cytosol);GO:0006629(lipid metabolic process);GO:0006641(triglyceride metabolic process);GO:0006644(phospholipid metabolic process);GO:0007031(peroxisome organization);GO:0008654(p…	00564(Glycerophospholipid metabolism);00565(Ether lipid metabolism);00590(Arachidonic acid metabolism);00591(Linoleic acid metabolism);00592(alpha-Linolenic acid metabolism);04014(Ras signaling pathway);04923(Regulation of lipolysis in adipocytes)	down
ENSG00000105722	ERF	-0.514381	1.13328e-115	4.92231e-111	0.095	0.245	ETS2 repressor factor [Source:HGNC Symbol;Acc:HGNC:3444]	GO:0000122(negative regulation of transcription by RNA polymerase II);GO:0000278(mitotic cell cycle);GO:0000981(DNA-binding transcription factor activity, RNA polymerase II-specific);GO:0001227(DNA-binding transcription repressor activity, RNA polymerase II-specific);GO:0003677(DNA binding);GO:0003700(DNA-binding transcription factor activity);GO:0003714(transcription corepressor activity);GO:000…	NA	down
ENSG00000211677	IGLC2	-0.56694	1.96585e-115	8.53846e-111	0.069	0.195	immunoglobulin lambda constant 2 [Source:HGNC Symbol;Acc:HGNC:5856]	GO:0002250(adaptive immune response);GO:0002376(immune system process);GO:0003823(antigen binding);GO:0005576(extracellular region);GO:0005615(extracellular space);GO:0005886(plasma membrane);GO:0006898(receptor-mediated endocytosis);GO:0006910(phagocytosis, recognition);GO:0006911(phagocytosis, engulfment);GO:0006956(complement activation);GO:0006958(complement activation, classical pathway);GO:…	NA	down
ENSG00000172889	EGFL7	-0.501722	2.03827e-115	8.853e-111	0.053	0.176	EGF like domain multiple 7 [Source:HGNC Symbol;Acc:HGNC:20594]	GO:0001525(angiogenesis);GO:0001568(blood vessel development);GO:0001570(vasculogenesis);GO:0001938(positive regulation of endothelial cell proliferation);GO:0005102(signaling receptor binding);GO:0005509(calcium ion binding);GO:0005515(protein binding);GO:0005576(extracellular region);GO:0005615(extracellular space);GO:0007155(cell adhesion);GO:0007275(multicellular organism development);GO:0009…	NA	down
ENSG00000153187	HNRNPU	-0.516542	3.53612e-115	1.53588e-110	0.772	0.855	heterogeneous nuclear ribonucleoprotein U [Source:HGNC Symbol;Acc:HGNC:5048]	GO:0000122(negative regulation of transcription by RNA polymerase II);GO:0000166(nucleotide binding);GO:0000228(nuclear chromosome);GO:0000381(regulation of alternative mRNA splicing, via spliceosome);GO:0000398(mRNA splicing, via spliceosome);GO:0000775(chromosome, centromeric region);GO:0000776(kinetochore);GO:0000777(condensed chromosome kinetochore);GO:0000922(spindle pole);GO:0000978(RNA pol…	03040(Spliceosome)	down
ENSG00000176046	NUPR1	-0.486002	3.55732e-115	1.54509e-110	0.029	0.137	nuclear protein 1, transcriptional regulator [Source:HGNC Symbol;Acc:HGNC:29990]	GO:0002526(acute inflammatory response);GO:0003677(DNA binding);GO:0003682(chromatin binding);GO:0003713(transcription coactivator activity);GO:0005515(protein binding);GO:0005634(nucleus);GO:0005737(cytoplasm);GO:0005829(cytosol);GO:0006473(protein acetylation);GO:0008283(cell population proliferation);GO:0008285(negative regulation of cell population proliferation);GO:0008584(male gonad develop…	05202(Transcriptional misregulation in cancer)	down
ENSG00000042980	ADAM28	-0.345896	3.72626e-115	1.61846e-110	0.042	0.164	ADAM metallopeptidase domain 28 [Source:HGNC Symbol;Acc:HGNC:206]	GO:0004222(metalloendopeptidase activity);GO:0005576(extracellular region);GO:0005739(mitochondrion);GO:0005886(plasma membrane);GO:0006508(proteolysis);GO:0007283(spermatogenesis);GO:0008233(peptidase activity);GO:0008237(metallopeptidase activity);GO:0016020(membrane);GO:0016021(integral component of membrane);GO:0016787(hydrolase activity);GO:0046872(metal ion binding)	NA	down
ENSG00000172965	MIR4435-2HG	0.398678	3.77001e-115	1.63746e-110	0.143	0.019	MIR4435-2 host gene [Source:HGNC Symbol;Acc:HGNC:35163]	NA	NA	up
ENSG00000100100	PIK3IP1	-0.479861	5.31044e-115	2.30654e-110	0.087	0.237	phosphoinositide-3-kinase interacting protein 1 [Source:HGNC Symbol;Acc:HGNC:24942]	GO:0005515(protein binding);GO:0005886(plasma membrane);GO:0014067(negative regulation of phosphatidylinositol 3-kinase signaling);GO:0016020(membrane);GO:0016021(integral component of membrane);GO:0036313(phosphatidylinositol 3-kinase catalytic subunit binding);GO:0043553(negative regulation of phosphatidylinositol 3-kinase activity)	NA	down
ENSG00000130340	SNX9	-0.56248	5.89705e-115	2.56133e-110	0.218	0.405	sorting nexin 9 [Source:HGNC Symbol;Acc:HGNC:14973]	GO:0000278(mitotic cell cycle);GO:0000281(mitotic cytokinesis);GO:0001726(ruffle);GO:0005515(protein binding);GO:0005545(1-phosphatidylinositol binding);GO:0005737(cytoplasm);GO:0005794(Golgi apparatus);GO:0005802(trans-Golgi network);GO:0005829(cytosol);GO:0005886(plasma membrane);GO:0006886(intracellular protein transport);GO:0006897(endocytosis);GO:0006898(receptor-mediated endocytosis);GO:000…	NA	down
ENSG00000090238	YPEL3	-0.496555	7.31645e-115	3.17782e-110	0.139	0.317	yippee like 3 [Source:HGNC Symbol;Acc:HGNC:18327]	GO:0005634(nucleus);GO:0005730(nucleolus);GO:0046872(metal ion binding);GO:2000774(positive regulation of cellular senescence)	NA	down
ENSG00000160593	JAML	-0.259281	8.01432e-115	3.48094e-110	0.082	0.211	junction adhesion molecule like [Source:HGNC Symbol;Acc:HGNC:19084]	GO:0002376(immune system process);GO:0005178(integrin binding);GO:0005886(plasma membrane);GO:0005923(bicellular tight junction);GO:0007155(cell adhesion);GO:0007157(heterophilic cell-cell adhesion via plasma membrane cell adhesion molecules);GO:0016020(membrane);GO:0016021(integral component of membrane);GO:0030054(cell junction);GO:0030593(neutrophil chemotaxis);GO:0035696(monocyte extravasatio…	NA	no_diff
ENSG00000125505	MBOAT7	0.607054	9.39659e-115	4.08132e-110	0.279	0.109	membrane bound O-acyltransferase domain containing 7 [Source:HGNC Symbol;Acc:HGNC:15505]	GO:0003841(1-acylglycerol-3-phosphate O-acyltransferase activity);GO:0005515(protein binding);GO:0005783(endoplasmic reticulum);GO:0005789(endoplasmic reticulum membrane);GO:0006629(lipid metabolic process);GO:0006644(phospholipid metabolic process);GO:0008654(phospholipid biosynthetic process);GO:0016020(membrane);GO:0016021(integral component of membrane);GO:0016740(transferase activity);GO:001…	00564(Glycerophospholipid metabolism)	up
ENSG00000090674	MCOLN1	-0.580702	1.51911e-114	6.59811e-110	0.206	0.388	mucolipin 1 [Source:HGNC Symbol;Acc:HGNC:13356]	GO:0001891(phagocytic cup);GO:0002250(adaptive immune response);GO:0002376(immune system process);GO:0005261(cation channel activity);GO:0005381(iron ion transmembrane transporter activity);GO:0005515(protein binding);GO:0005764(lysosome);GO:0005765(lysosomal membrane);GO:0005768(endosome);GO:0005770(late endosome);GO:0005829(cytosol);GO:0005886(plasma membrane);GO:0005887(integral component of p…	04142(Lysosome)	down
ENSG00000139218	SCAF11	-0.507894	1.81815e-114	7.89697e-110	0.51	0.691	SR-related CTD associated factor 11 [Source:HGNC Symbol;Acc:HGNC:10784]	GO:0000245(spliceosomal complex assembly);GO:0000375(RNA splicing, via transesterification reactions);GO:0003723(RNA binding);GO:0005515(protein binding);GO:0005634(nucleus);GO:0005654(nucleoplasm);GO:0005730(nucleolus);GO:0006397(mRNA processing);GO:0008380(RNA splicing);GO:0016604(nuclear body);GO:0046872(metal ion binding)	NA	down
ENSG00000135318	NT5E	0.414573	1.92531e-114	8.36237e-110	0.097	0.002	5'-nucleotidase ecto [Source:HGNC Symbol;Acc:HGNC:8021]	GO:0000166(nucleotide binding);GO:0005654(nucleoplasm);GO:0005829(cytosol);GO:0005886(plasma membrane);GO:0006195(purine nucleotide catabolic process);GO:0006196(AMP catabolic process);GO:0006259(DNA metabolic process);GO:0007159(leukocyte cell-cell adhesion);GO:0008253(5'-nucleotidase activity);GO:0009166(nucleotide catabolic process);GO:0009986(cell surface);GO:0016020(membrane);GO:0016311(deph…	00230(Purine metabolism);00240(Pyrimidine metabolism);00760(Nicotinate and nicotinamide metabolism)	no_diff
ENSG00000157827	FMNL2	-0.477953	4.48212e-114	1.94677e-109	0.109	0.269	formin like 2 [Source:HGNC Symbol;Acc:HGNC:18267]	GO:0003779(actin binding);GO:0005737(cytoplasm);GO:0005829(cytosol);GO:0007010(cytoskeleton organization);GO:0016043(cellular component organization);GO:0017048(Rho GTPase binding);GO:0022604(regulation of cell morphogenesis);GO:0030036(actin cytoskeleton organization);GO:0030866(cortical actin cytoskeleton organization);GO:0045296(cadherin binding)	NA	down
ENSG00000162783	IER5	-0.573787	1.25578e-113	5.45434e-109	0.421	0.609	immediate early response 5 [Source:HGNC Symbol;Acc:HGNC:5393]	GO:0000159(protein phosphatase type 2A complex);GO:0005515(protein binding);GO:0005634(nucleus);GO:0005737(cytoplasm);GO:0034605(cellular response to heat);GO:0042127(regulation of cell population proliferation);GO:0042802(identical protein binding);GO:0045944(positive regulation of transcription by RNA polymerase II);GO:1900036(positive regulation of cellular response to heat)	NA	down
ENSG00000182117	NOP10	0.551352	1.40703e-113	6.11131e-109	0.604	0.455	NOP10 ribonucleoprotein [Source:HGNC Symbol;Acc:HGNC:14378]	GO:0000454(snoRNA guided rRNA pseudouridine synthesis);GO:0001522(pseudouridine synthesis);GO:0003723(RNA binding);GO:0005515(protein binding);GO:0005634(nucleus);GO:0005654(nucleoplasm);GO:0005697(telomerase holoenzyme complex);GO:0005730(nucleolus);GO:0005732(small nucleolar ribonucleoprotein complex);GO:0006364(rRNA processing);GO:0007004(telomere maintenance via telomerase);GO:0015030(Cajal b…	03008(Ribosome biogenesis in eukaryotes)	up
ENSG00000182578	CSF1R	-0.524304	3.44345e-113	1.49563e-108	0.544	0.707	colony stimulating factor 1 receptor [Source:HGNC Symbol;Acc:HGNC:2433]	GO:0000166(nucleotide binding);GO:0001934(positive regulation of protein phosphorylation);GO:0002244(hematopoietic progenitor cell differentiation);GO:0002376(immune system process);GO:0002931(response to ischemia);GO:0004672(protein kinase activity);GO:0004713(protein tyrosine kinase activity);GO:0004714(transmembrane receptor protein tyrosine kinase activity);GO:0005011(macrophage colony-stimul…	04010(MAPK signaling pathway);04014(Ras signaling pathway);04015(Rap1 signaling pathway);04060(Cytokine-cytokine receptor interaction);04151(PI3K-Akt signaling pathway);04380(Osteoclast differentiation);04640(Hematopoietic cell lineage);05200(Pathways in cancer);05202(Transcriptional misregulation in cancer);05221(Acute myeloid leukemia)	down
ENSG00000011405	PIK3C2A	-0.488443	4.77565e-113	2.07425e-108	0.125	0.291	phosphatidylinositol-4-phosphate 3-kinase catalytic subunit type 2 alpha [Source:HGNC Symbol;Acc:HGNC:8971]	GO:0000166(nucleotide binding);GO:0005524(ATP binding);GO:0005634(nucleus);GO:0005737(cytoplasm);GO:0005794(Golgi apparatus);GO:0005829(cytosol);GO:0005886(plasma membrane);GO:0005942(phosphatidylinositol 3-kinase complex);GO:0006661(phosphatidylinositol biosynthetic process);GO:0006887(exocytosis);GO:0006897(endocytosis);GO:0007173(epidermal growth factor receptor signaling pathway);GO:0008286(i…	00562(Inositol phosphate metabolism);04070(Phosphatidylinositol signaling system)	down
ENSG00000168653	NDUFS5	0.55493	4.86886e-113	2.11474e-108	0.614	0.438	NADH:ubiquinone oxidoreductase subunit S5 [Source:HGNC Symbol;Acc:HGNC:7712]	GO:0005739(mitochondrion);GO:0005743(mitochondrial inner membrane);GO:0005747(mitochondrial respiratory chain complex I);GO:0005758(mitochondrial intermembrane space);GO:0006120(mitochondrial electron transport, NADH to ubiquinone);GO:0008137(NADH dehydrogenase (ubiquinone) activity);GO:0016020(membrane);GO:0032981(mitochondrial respiratory chain complex I assembly);GO:0055114(oxidation-reduction…	00190(Oxidative phosphorylation);04714(Thermogenesis);04723(Retrograde endocannabinoid signaling);04932(Non-alcoholic fatty liver disease (NAFLD));05010(Alzheimer disease);05012(Parkinson disease);05016(Huntington disease)	up
ENSG00000130755	GMFG	0.557106	7.26576e-113	3.15581e-108	0.649	0.502	glia maturation factor gamma [Source:HGNC Symbol;Acc:HGNC:4374]	GO:0003779(actin binding);GO:0004860(protein kinase inhibitor activity);GO:0005576(extracellular region);GO:0005622(intracellular);GO:0006468(protein phosphorylation);GO:0006469(negative regulation of protein kinase activity);GO:0008047(enzyme activator activity);GO:0008083(growth factor activity);GO:0010469(regulation of signaling receptor activity);GO:0030479(actin cortical patch);GO:0034316(ne…	NA	up
ENSG00000119655	NPC2	-0.406809	9.53287e-113	4.14051e-108	0.859	0.933	NPC intracellular cholesterol transporter 2 [Source:HGNC Symbol;Acc:HGNC:14537]	GO:0005515(protein binding);GO:0005576(extracellular region);GO:0005615(extracellular space);GO:0005623(cell);GO:0005764(lysosome);GO:0005783(endoplasmic reticulum);GO:0006629(lipid metabolic process);GO:0006869(lipid transport);GO:0008202(steroid metabolic process);GO:0008203(cholesterol metabolic process);GO:0009615(response to virus);GO:0015485(cholesterol binding);GO:0015914(phospholipid tran…	04142(Lysosome);04979(Cholesterol metabolism)	down
ENSG00000229124	VIM-AS1	0.509348	2.03715e-112	8.84815e-108	0.184	0.043	VIM antisense RNA 1 [Source:HGNC Symbol;Acc:HGNC:44879]	NA	NA	up
ENSG00000156171	DRAM2	-0.508263	5.36782e-112	2.33146e-107	0.189	0.367	DNA damage regulated autophagy modulator 2 [Source:HGNC Symbol;Acc:HGNC:28769]	GO:0001917(photoreceptor inner segment);GO:0005737(cytoplasm);GO:0005764(lysosome);GO:0005765(lysosomal membrane);GO:0005794(Golgi apparatus);GO:0005886(plasma membrane);GO:0006914(autophagy);GO:0006915(apoptotic process);GO:0007601(visual perception);GO:0010506(regulation of autophagy);GO:0016020(membrane);GO:0016021(integral component of membrane);GO:0016324(apical plasma membrane);GO:0043231(i…	NA	down
ENSG00000155926	SLA	0.512806	1.14155e-111	4.9582e-107	0.664	0.602	Src like adaptor [Source:HGNC Symbol;Acc:HGNC:10902]	GO:0004715(non-membrane spanning protein tyrosine kinase activity);GO:0005070(SH3/SH2 adaptor activity);GO:0005515(protein binding);GO:0005737(cytoplasm);GO:0005768(endosome);GO:0009966(regulation of signal transduction);GO:0009967(positive regulation of signal transduction);GO:0030154(cell differentiation);GO:0038083(peptidyl-tyrosine autophosphorylation);GO:0042127(regulation of cell population…	NA	up
ENSG00000130724	CHMP2A	0.573376	1.2983e-111	5.63904e-107	0.514	0.327	charged multivesicular body protein 2A [Source:HGNC Symbol;Acc:HGNC:30216]	GO:0000785(chromatin);GO:0000815(ESCRT III complex);GO:0005515(protein binding);GO:0005635(nuclear envelope);GO:0005768(endosome);GO:0005771(multivesicular body);GO:0005829(cytosol);GO:0006997(nucleus organization);GO:0007034(vacuolar transport);GO:0007080(mitotic metaphase plate congression);GO:0010324(membrane invagination);GO:0010458(exit from mitosis);GO:0010824(regulation of centrosome dupli…	04144(Endocytosis);04217(Necroptosis)	up
ENSG00000128699	ORMDL1	-0.544184	1.71011e-111	7.4277e-107	0.28	0.459	ORMDL sphingolipid biosynthesis regulator 1 [Source:HGNC Symbol;Acc:HGNC:16036]	GO:0005783(endoplasmic reticulum);GO:0005789(endoplasmic reticulum membrane);GO:0006672(ceramide metabolic process);GO:0016020(membrane);GO:0016021(integral component of membrane);GO:0035339(SPOTS complex);GO:0090155(negative regulation of sphingolipid biosynthetic process);GO:0090156(cellular sphingolipid homeostasis);GO:1900060(negative regulation of ceramide biosynthetic process)	NA	down
ENSG00000127948	POR	0.577079	1.72749e-111	7.50316e-107	0.291	0.125	cytochrome p450 oxidoreductase [Source:HGNC Symbol;Acc:HGNC:9208]	GO:0003420(regulation of growth plate cartilage chondrocyte proliferation);GO:0003958(NADPH-hemoprotein reductase activity);GO:0004128(cytochrome-b5 reductase activity, acting on NAD(P)H);GO:0005515(protein binding);GO:0005737(cytoplasm);GO:0005739(mitochondrion);GO:0005783(endoplasmic reticulum);GO:0005789(endoplasmic reticulum membrane);GO:0005829(cytosol);GO:0006805(xenobiotic metabolic proces…	NA	up
ENSG00000111716	LDHB	-0.509638	2.47945e-111	1.07692e-106	0.151	0.311	lactate dehydrogenase B [Source:HGNC Symbol;Acc:HGNC:6541]	GO:0003824(catalytic activity);GO:0004459(L-lactate dehydrogenase activity);GO:0005515(protein binding);GO:0005737(cytoplasm);GO:0005829(cytosol);GO:0005975(carbohydrate metabolic process);GO:0006090(pyruvate metabolic process);GO:0016020(membrane);GO:0016491(oxidoreductase activity);GO:0016616(oxidoreductase activity, acting on the CH-OH group of donors, NAD or NADP as acceptor);GO:0019752(carbo…	00010(Glycolysis / Gluconeogenesis);00270(Cysteine and methionine metabolism);00620(Pyruvate metabolism);00640(Propanoate metabolism);04922(Glucagon signaling pathway)	down
ENSG00000170385	SLC30A1	-0.567981	2.77275e-111	1.20432e-106	0.178	0.342	solute carrier family 30 member 1 [Source:HGNC Symbol;Acc:HGNC:11012]	GO:0001701(in utero embryonic development);GO:0005385(zinc ion transmembrane transporter activity);GO:0005515(protein binding);GO:0005737(cytoplasm);GO:0005783(endoplasmic reticulum);GO:0005794(Golgi apparatus);GO:0005886(plasma membrane);GO:0006811(ion transport);GO:0006812(cation transport);GO:0006829(zinc ion transport);GO:0006874(cellular calcium ion homeostasis);GO:0006882(cellular zinc ion …	04978(Mineral absorption)	down
ENSG00000269893	SNHG8	-0.559935	4.06405e-111	1.76518e-106	0.325	0.502	small nucleolar RNA host gene 8 [Source:HGNC Symbol;Acc:HGNC:33098]	NA	NA	down
ENSG00000156136	DCK	-0.401112	4.49229e-111	1.95118e-106	0.052	0.178	deoxycytidine kinase [Source:HGNC Symbol;Acc:HGNC:2704]	GO:0000166(nucleotide binding);GO:0004137(deoxycytidine kinase activity);GO:0005524(ATP binding);GO:0005634(nucleus);GO:0005737(cytoplasm);GO:0005829(cytosol);GO:0006139(nucleobase-containing compound metabolic process);GO:0006220(pyrimidine nucleotide metabolic process);GO:0008144(drug binding);GO:0009157(deoxyribonucleoside monophosphate biosynthetic process);GO:0009165(nucleotide biosynthetic …	00230(Purine metabolism);00240(Pyrimidine metabolism)	down
ENSG00000179094	AC129492.1	-0.534035	4.82234e-111	2.09454e-106	0.3	0.507	period circadian regulator 1 [Source:NCBI gene;Acc:5187]	GO:0000122(negative regulation of transcription by RNA polymerase II);GO:0000976(transcription regulatory region sequence-specific DNA binding);GO:0000978(RNA polymerase II proximal promoter sequence-specific DNA binding);GO:0001222(transcription corepressor binding);GO:0002028(regulation of sodium ion transport);GO:0005515(protein binding);GO:0005634(nucleus);GO:0005654(nucleoplasm);GO:0005737(c…	04710(Circadian rhythm);04713(Circadian entrainment)	down
ENSG00000125730	C3	-0.416693	5.45292e-111	2.36842e-106	0.054	0.182	complement C3 [Source:HGNC Symbol;Acc:HGNC:1318]	GO:0001798(positive regulation of type IIa hypersensitivity);GO:0001934(positive regulation of protein phosphorylation);GO:0001970(positive regulation of activation of membrane attack complex);GO:0002376(immune system process);GO:0004866(endopeptidase inhibitor activity);GO:0005102(signaling receptor binding);GO:0005515(protein binding);GO:0005576(extracellular region);GO:0005615(extracellular sp…	04080(Neuroactive ligand-receptor interaction);04145(Phagosome);04610(Complement and coagulation cascades);05133(Pertussis);05134(Legionellosis);05140(Leishmaniasis);05142(Chagas disease (American trypanosomiasis));05150(Staphylococcus aureus infection);05152(Tuberculosis);05167(Kaposi sarcoma-associated herpesvirus infection);05168(Herpes simplex virus 1 infection);05203(Viral carcinogenesis);05…	down
ENSG00000114125	RNF7	0.569793	6.81127e-111	2.95841e-106	0.509	0.338	ring finger protein 7 [Source:HGNC Symbol;Acc:HGNC:10070]	GO:0004842(ubiquitin-protein transferase activity);GO:0005507(copper ion binding);GO:0005515(protein binding);GO:0005634(nucleus);GO:0005654(nucleoplasm);GO:0005680(anaphase-promoting complex);GO:0005737(cytoplasm);GO:0005829(cytosol);GO:0006511(ubiquitin-dependent protein catabolic process);GO:0008270(zinc ion binding);GO:0016567(protein ubiquitination);GO:0019788(NEDD8 transferase activity);GO:…	04120(Ubiquitin mediated proteolysis);05170(Human immunodeficiency virus 1 infection)	up
ENSG00000129128	SPCS3	0.575455	1.64639e-110	7.15094e-106	0.514	0.329	signal peptidase complex subunit 3 [Source:HGNC Symbol;Acc:HGNC:26212]	GO:0005783(endoplasmic reticulum);GO:0005787(signal peptidase complex);GO:0005789(endoplasmic reticulum membrane);GO:0006465(signal peptide processing);GO:0006508(proteolysis);GO:0008233(peptidase activity);GO:0016020(membrane);GO:0016021(integral component of membrane);GO:0016787(hydrolase activity);GO:0031090(organelle membrane);GO:0043231(intracellular membrane-bounded organelle);GO:0045047(pr…	03060(Protein export)	up
ENSG00000160307	S100B	-0.383292	2.00116e-110	8.69185e-106	0.013	0.095	S100 calcium binding protein B [Source:HGNC Symbol;Acc:HGNC:10500]	GO:0001726(ruffle);GO:0005102(signaling receptor binding);GO:0005509(calcium ion binding);GO:0005515(protein binding);GO:0005576(extracellular region);GO:0005615(extracellular space);GO:0005634(nucleus);GO:0005737(cytoplasm);GO:0007409(axonogenesis);GO:0007417(central nervous system development);GO:0007611(learning or memory);GO:0007613(memory);GO:0008270(zinc ion binding);GO:0008283(cell populat…	NA	no_diff
ENSG00000132341	RAN	0.551214	4.12902e-110	1.7934e-105	0.535	0.398	RAN, member RAS oncogene family [Source:HGNC Symbol;Acc:HGNC:9846]	GO:0000055(ribosomal large subunit export from nucleus);GO:0000056(ribosomal small subunit export from nucleus);GO:0000070(mitotic sister chromatid segregation);GO:0000166(nucleotide binding);GO:0000278(mitotic cell cycle);GO:0000287(magnesium ion binding);GO:0000785(chromatin);GO:0001673(male germ cell nucleus);GO:0002177(manchette);GO:0003682(chromatin binding);GO:0003723(RNA binding);GO:000392…	03008(Ribosome biogenesis in eukaryotes);03013(RNA transport);05166(Human T-cell leukemia virus 1 infection)	up
ENSG00000100852	ARHGAP5	-0.510703	5.83916e-110	2.53618e-105	0.13	0.297	Rho GTPase activating protein 5 [Source:HGNC Symbol;Acc:HGNC:675]	GO:0003924(GTPase activity);GO:0005096(GTPase activator activity);GO:0005515(protein binding);GO:0005525(GTP binding);GO:0005737(cytoplasm);GO:0005783(endoplasmic reticulum);GO:0005829(cytosol);GO:0005886(plasma membrane);GO:0007155(cell adhesion);GO:0007165(signal transduction);GO:0007266(Rho protein signal transduction);GO:0016020(membrane);GO:0030879(mammary gland development);GO:0042169(SH2 d…	04510(Focal adhesion);04670(Leukocyte transendothelial migration)	down
ENSG00000077942	FBLN1	-0.388059	1.17224e-109	5.09149e-105	0.044	0.164	fibulin 1 [Source:HGNC Symbol;Acc:HGNC:3600]	GO:0001933(negative regulation of protein phosphorylation);GO:0001968(fibronectin binding);GO:0005201(extracellular matrix structural constituent);GO:0005509(calcium ion binding);GO:0005576(extracellular region);GO:0005604(basement membrane);GO:0005615(extracellular space);GO:0007162(negative regulation of cell adhesion);GO:0007566(embryo implantation);GO:0008022(protein C-terminus binding);GO:00…	NA	down
ENSG00000074842	MYDGF	0.58194	1.19503e-109	5.19048e-105	0.405	0.231	myeloid derived growth factor [Source:HGNC Symbol;Acc:HGNC:16948]	GO:0001525(angiogenesis);GO:0001934(positive regulation of protein phosphorylation);GO:0001938(positive regulation of endothelial cell proliferation);GO:0005515(protein binding);GO:0005576(extracellular region);GO:0005615(extracellular space);GO:0005783(endoplasmic reticulum);GO:0005788(endoplasmic reticulum lumen);GO:0005793(endoplasmic reticulum-Golgi intermediate compartment);GO:0005794(Golgi …	NA	up
ENSG00000164683	HEY1	0.426519	7.10439e-109	3.08572e-104	0.104	0.006	hes related family bHLH transcription factor with YRPW motif 1 [Source:HGNC Symbol;Acc:HGNC:4880]	GO:0000122(negative regulation of transcription by RNA polymerase II);GO:0000977(RNA polymerase II regulatory region sequence-specific DNA binding);GO:0000981(DNA-binding transcription factor activity, RNA polymerase II-specific);GO:0001227(DNA-binding transcription repressor activity, RNA polymerase II-specific);GO:0001525(angiogenesis);GO:0001568(blood vessel development);GO:0003184(pulmonary v…	05165(Human papillomavirus infection);05200(Pathways in cancer);05224(Breast cancer)	up
ENSG00000119729	RHOQ	-0.536193	7.52958e-109	3.2704e-104	0.377	0.564	ras homolog family member Q [Source:HGNC Symbol;Acc:HGNC:17736]	GO:0000166(nucleotide binding);GO:0003924(GTPase activity);GO:0005515(protein binding);GO:0005522(profilin binding);GO:0005525(GTP binding);GO:0005622(intracellular);GO:0005737(cytoplasm);GO:0005829(cytosol);GO:0005884(actin filament);GO:0005886(plasma membrane);GO:0005938(cell cortex);GO:0006897(endocytosis);GO:0007015(actin filament organization);GO:0007163(establishment or maintenance of cell …	04910(Insulin signaling pathway)	down
ENSG00000147874	HAUS6	0.573965	1.45836e-108	6.33423e-104	0.215	0.066	HAUS augmin like complex subunit 6 [Source:HGNC Symbol;Acc:HGNC:25948]	GO:0000086(G2/M transition of mitotic cell cycle);GO:0003674(molecular_function);GO:0005515(protein binding);GO:0005737(cytoplasm);GO:0005813(centrosome);GO:0005815(microtubule organizing center);GO:0005819(spindle);GO:0005829(cytosol);GO:0005856(cytoskeleton);GO:0005874(microtubule);GO:0007049(cell cycle);GO:0007098(centrosome cycle);GO:0010389(regulation of G2/M transition of mitotic cell cycle…	NA	up
ENSG00000165338	HECTD2	-0.30652	1.47487e-108	6.40596e-104	0.024	0.123	HECT domain E3 ubiquitin protein ligase 2 [Source:HGNC Symbol;Acc:HGNC:26736]	GO:0000209(protein polyubiquitination);GO:0004842(ubiquitin-protein transferase activity);GO:0005829(cytosol);GO:0016567(protein ubiquitination);GO:0016740(transferase activity)	NA	down
ENSG00000064393	HIPK2	0.618322	2.17259e-108	9.43641e-104	0.372	0.201	homeodomain interacting protein kinase 2 [Source:HGNC Symbol;Acc:HGNC:14402]	GO:0000122(negative regulation of transcription by RNA polymerase II);GO:0000166(nucleotide binding);GO:0001102(RNA polymerase II activating transcription factor binding);GO:0001654(eye development);GO:0001934(positive regulation of protein phosphorylation);GO:0003713(transcription coactivator activity);GO:0003714(transcription corepressor activity);GO:0004672(protein kinase activity);GO:0004674(…	04218(Cellular senescence)	up
ENSG00000135643	KCNMB4	-0.20818	2.24274e-108	9.74113e-104	0.007	0.078	potassium calcium-activated channel subfamily M regulatory beta subunit 4 [Source:HGNC Symbol;Acc:HGNC:6289]	GO:0001508(action potential);GO:0005513(detection of calcium ion);GO:0005515(protein binding);GO:0005886(plasma membrane);GO:0005887(integral component of plasma membrane);GO:0006811(ion transport);GO:0006813(potassium ion transport);GO:0007268(chemical synaptic transmission);GO:0008076(voltage-gated potassium channel complex);GO:0015269(calcium-activated potassium channel activity);GO:0015459(po…	04022(cGMP-PKG signaling pathway);04270(Vascular smooth muscle contraction);04911(Insulin secretion)	no_diff
ENSG00000145912	NHP2	0.585687	2.57646e-108	1.11906e-103	0.332	0.157	NHP2 ribonucleoprotein [Source:HGNC Symbol;Acc:HGNC:14377]	GO:0000469(cleavage involved in rRNA processing);GO:0000470(maturation of LSU-rRNA);GO:0000784(nuclear chromosome, telomeric region);GO:0003723(RNA binding);GO:0005515(protein binding);GO:0005634(nucleus);GO:0005654(nucleoplasm);GO:0005697(telomerase holoenzyme complex);GO:0005730(nucleolus);GO:0005732(small nucleolar ribonucleoprotein complex);GO:0006364(rRNA processing);GO:0007004(telomere main…	03008(Ribosome biogenesis in eukaryotes)	up
ENSG00000129757	CDKN1C	-0.455124	3.33138e-108	1.44695e-103	0.058	0.189	cyclin dependent kinase inhibitor 1C [Source:HGNC Symbol;Acc:HGNC:1786]	GO:0000122(negative regulation of transcription by RNA polymerase II);GO:0001501(skeletal system development);GO:0001822(kidney development);GO:0001890(placenta development);GO:0004860(protein kinase inhibitor activity);GO:0004861(cyclin-dependent protein serine/threonine kinase inhibitor activity);GO:0005515(protein binding);GO:0005634(nucleus);GO:0005737(cytoplasm);GO:0007049(cell cycle);GO:000…	04110(Cell cycle)	down
ENSG00000172531	PPP1CA	0.54625	3.83179e-108	1.6643e-103	0.539	0.359	protein phosphatase 1 catalytic subunit alpha [Source:HGNC Symbol;Acc:HGNC:9281]	GO:0000164(protein phosphatase type 1 complex);GO:0000784(nuclear chromosome, telomeric region);GO:0004721(phosphoprotein phosphatase activity);GO:0004722(protein serine/threonine phosphatase activity);GO:0005515(protein binding);GO:0005634(nucleus);GO:0005654(nucleoplasm);GO:0005730(nucleolus);GO:0005737(cytoplasm);GO:0005829(cytosol);GO:0005886(plasma membrane);GO:0005913(cell-cell adherens jun…	03015(mRNA surveillance pathway);04022(cGMP-PKG signaling pathway);04024(cAMP signaling pathway);04114(Oocyte meiosis);04218(Cellular senescence);04261(Adrenergic signaling in cardiomyocytes);04270(Vascular smooth muscle contraction);04390(Hippo signaling pathway);04510(Focal adhesion);04611(Platelet activation);04720(Long-term potentiation);04728(Dopaminergic synapse);04750(Inflammatory mediator…	up
ENSG00000106976	DNM1	-0.285512	7.65719e-108	3.32582e-103	0.01	0.087	dynamin 1 [Source:HGNC Symbol;Acc:HGNC:2972]	GO:0000166(nucleotide binding);GO:0001917(photoreceptor inner segment);GO:0002031(G protein-coupled receptor internalization);GO:0003723(RNA binding);GO:0003924(GTPase activity);GO:0005515(protein binding);GO:0005525(GTP binding);GO:0005634(nucleus);GO:0005654(nucleoplasm);GO:0005737(cytoplasm);GO:0005794(Golgi apparatus);GO:0005856(cytoskeleton);GO:0005874(microtubule);GO:0005886(plasma membrane…	04072(Phospholipase D signaling pathway);04144(Endocytosis);04721(Synaptic vesicle cycle);04961(Endocrine and other factor-regulated calcium reabsorption);05100(Bacterial invasion of epithelial cells)	no_diff
ENSG00000204256	BRD2	-0.535575	7.86428e-108	3.41577e-103	0.463	0.63	bromodomain containing 2 [Source:HGNC Symbol;Acc:HGNC:1103]	GO:0003682(chromatin binding);GO:0005515(protein binding);GO:0005634(nucleus);GO:0005654(nucleoplasm);GO:0005737(cytoplasm);GO:0006325(chromatin organization);GO:0006334(nucleosome assembly);GO:0006357(regulation of transcription by RNA polymerase II);GO:0007283(spermatogenesis);GO:0016032(viral process);GO:0016607(nuclear speck);GO:0070577(lysine-acetylated histone binding)	NA	down
ENSG00000062282	DGAT2	0.324169	1.06389e-107	4.62092e-103	0.089	0.002	diacylglycerol O-acyltransferase 2 [Source:HGNC Symbol;Acc:HGNC:16940]	GO:0003846(2-acylglycerol O-acyltransferase activity);GO:0004144(diacylglycerol O-acyltransferase activity);GO:0005737(cytoplasm);GO:0005739(mitochondrion);GO:0005783(endoplasmic reticulum);GO:0005789(endoplasmic reticulum membrane);GO:0005811(lipid droplet);GO:0006071(glycerol metabolic process);GO:0006629(lipid metabolic process);GO:0010867(positive regulation of triglyceride biosynthetic proce…	00561(Glycerolipid metabolism);04975(Fat digestion and absorption)	no_diff
ENSG00000143819	EPHX1	-0.357506	1.3313e-107	5.78236e-103	0.026	0.126	epoxide hydrolase 1 [Source:HGNC Symbol;Acc:HGNC:3401]	GO:0003824(catalytic activity);GO:0004301(epoxide hydrolase activity);GO:0005783(endoplasmic reticulum);GO:0005789(endoplasmic reticulum membrane);GO:0006725(cellular aromatic compound metabolic process);GO:0006805(xenobiotic metabolic process);GO:0009636(response to toxic substance);GO:0014070(response to organic cyclic compound);GO:0016020(membrane);GO:0016021(integral component of membrane);GO…	00980(Metabolism of xenobiotics by cytochrome P450);04976(Bile secretion);05204(Chemical carcinogenesis)	down
ENSG00000183020	AP2A2	-0.575578	1.51576e-107	6.58357e-103	0.307	0.484	adaptor related protein complex 2 subunit alpha 2 [Source:HGNC Symbol;Acc:HGNC:562]	GO:0003674(molecular_function);GO:0005515(protein binding);GO:0005829(cytosol);GO:0005886(plasma membrane);GO:0005905(clathrin-coated pit);GO:0006886(intracellular protein transport);GO:0006897(endocytosis);GO:0008289(lipid binding);GO:0015031(protein transport);GO:0016020(membrane);GO:0016192(vesicle-mediated transport);GO:0019886(antigen processing and presentation of exogenous peptide antigen …	04144(Endocytosis);04721(Synaptic vesicle cycle);04961(Endocrine and other factor-regulated calcium reabsorption);05016(Huntington disease)	down
ENSG00000157259	GATAD1	-0.49105	1.62672e-107	7.06551e-103	0.163	0.335	GATA zinc finger domain containing 1 [Source:HGNC Symbol;Acc:HGNC:29941]	GO:0000981(DNA-binding transcription factor activity, RNA polymerase II-specific);GO:0005634(nucleus);GO:0005654(nucleoplasm);GO:0006355(regulation of transcription, DNA-templated);GO:0006357(regulation of transcription by RNA polymerase II);GO:0008270(zinc ion binding);GO:0031497(chromatin assembly);GO:0043565(sequence-specific DNA binding);GO:0046872(metal ion binding)	NA	down
ENSG00000138439	FAM117B	-0.289835	2.38727e-107	1.03689e-102	0.021	0.115	family with sequence similarity 117 member B [Source:HGNC Symbol;Acc:HGNC:14440]	GO:0005515(protein binding)	NA	down
ENSG00000160888	IER2	-0.480627	2.88052e-107	1.25113e-102	0.65	0.81	immediate early response 2 [Source:HGNC Symbol;Acc:HGNC:28871]	GO:0000977(RNA polymerase II regulatory region sequence-specific DNA binding);GO:0001228(DNA-binding transcription activator activity, RNA polymerase II-specific);GO:0003677(DNA binding);GO:0005634(nucleus);GO:0005654(nucleoplasm);GO:0005737(cytoplasm);GO:0030182(neuron differentiation);GO:0045944(positive regulation of transcription by RNA polymerase II);GO:0048870(cell motility);GO:0071774(resp…	NA	down
ENSG00000140497	SCAMP2	-0.52522	2.90026e-107	1.2597e-102	0.292	0.477	secretory carrier membrane protein 2 [Source:HGNC Symbol;Acc:HGNC:10564]	GO:0000139(Golgi membrane);GO:0005515(protein binding);GO:0005768(endosome);GO:0005794(Golgi apparatus);GO:0006892(post-Golgi vesicle-mediated transport);GO:0015031(protein transport);GO:0016020(membrane);GO:0016021(integral component of membrane);GO:0030133(transport vesicle);GO:0032588(trans-Golgi network membrane);GO:0043231(intracellular membrane-bounded organelle);GO:0055038(recycling endoso…	NA	down
ENSG00000176170	SPHK1	0.441406	4.0296e-107	1.75022e-102	0.172	0.038	sphingosine kinase 1 [Source:NCBI gene;Acc:8877]	GO:0000166(nucleotide binding);GO:0000287(magnesium ion binding);GO:0001568(blood vessel development);GO:0003376(sphingosine-1-phosphate receptor signaling pathway);GO:0003677(DNA binding);GO:0003951(NAD+ kinase activity);GO:0005515(protein binding);GO:0005516(calmodulin binding);GO:0005524(ATP binding);GO:0005634(nucleus);GO:0005737(cytoplasm);GO:0005829(cytosol);GO:0005886(plasma membrane);GO:0…	00600(Sphingolipid metabolism);04020(Calcium signaling pathway);04071(Sphingolipid signaling pathway);04072(Phospholipase D signaling pathway);04370(VEGF signaling pathway);04371(Apelin signaling pathway);04666(Fc gamma R-mediated phagocytosis);05152(Tuberculosis)	up
ENSG00000162692	VCAM1	-0.306633	4.96699e-107	2.15736e-102	0.002	0.057	vascular cell adhesion molecule 1 [Source:HGNC Symbol;Acc:HGNC:12663]	GO:0001666(response to hypoxia);GO:0002102(podosome);GO:0002526(acute inflammatory response);GO:0002544(chronic inflammatory response);GO:0005178(integrin binding);GO:0005615(extracellular space);GO:0005769(early endosome);GO:0005783(endoplasmic reticulum);GO:0005794(Golgi apparatus);GO:0005886(plasma membrane);GO:0005887(integral component of plasma membrane);GO:0005902(microvillus);GO:0007155(c…	04064(NF-kappa B signaling pathway);04514(Cell adhesion molecules (CAMs));04668(TNF signaling pathway);04670(Leukocyte transendothelial migration);04933(AGE-RAGE signaling pathway in diabetic complications);05143(African trypanosomiasis);05144(Malaria);05418(Fluid shear stress and atherosclerosis)	no_diff
ENSG00000211895	IGHA1	-0.512348	5.18428e-107	2.25174e-102	0.057	0.17	immunoglobulin heavy constant alpha 1 [Source:HGNC Symbol;Acc:HGNC:5478]	GO:0001895(retina homeostasis);GO:0002250(adaptive immune response);GO:0002376(immune system process);GO:0003094(glomerular filtration);GO:0003823(antigen binding);GO:0005576(extracellular region);GO:0005615(extracellular space);GO:0005886(plasma membrane);GO:0006898(receptor-mediated endocytosis);GO:0006910(phagocytosis, recognition);GO:0006911(phagocytosis, engulfment);GO:0006955(immune respons…	NA	down
ENSG00000125995	ROMO1	0.561721	5.73654e-107	2.49161e-102	0.427	0.24	reactive oxygen species modulator 1 [Source:HGNC Symbol;Acc:HGNC:16185]	GO:0001302(replicative cell aging);GO:0003674(molecular_function);GO:0005739(mitochondrion);GO:0005743(mitochondrial inner membrane);GO:0005744(TIM23 mitochondrial import inner membrane translocase complex);GO:0008284(positive regulation of cell population proliferation);GO:0016020(membrane);GO:0016021(integral component of membrane);GO:0030150(protein import into mitochondrial matrix);GO:0031640…	NA	up
ENSG00000162444	RBP7	-0.535031	6.93213e-107	3.0109e-102	0.198	0.376	retinol binding protein 7 [Source:HGNC Symbol;Acc:HGNC:30316]	GO:0005501(retinoid binding);GO:0005515(protein binding);GO:0005737(cytoplasm);GO:0008289(lipid binding);GO:0016918(retinal binding);GO:0019841(retinol binding)	NA	down
ENSG00000279400	AC008957.3	-0.335068	1.19585e-106	5.19404e-102	0.022	0.119	TEC	NA	NA	down
ENSG00000126821	SGPP1	-0.324995	1.49238e-106	6.48198e-102	0.027	0.128	sphingosine-1-phosphate phosphatase 1 [Source:HGNC Symbol;Acc:HGNC:17720]	GO:0005634(nucleus);GO:0005654(nucleoplasm);GO:0005783(endoplasmic reticulum);GO:0005789(endoplasmic reticulum membrane);GO:0005886(plasma membrane);GO:0006665(sphingolipid metabolic process);GO:0006668(sphinganine-1-phosphate metabolic process);GO:0006670(sphingosine metabolic process);GO:0016020(membrane);GO:0016021(integral component of membrane);GO:0016311(dephosphorylation);GO:0016787(hydrol…	00600(Sphingolipid metabolism);04071(Sphingolipid signaling pathway)	down
ENSG00000197448	GSTK1	-0.501132	2.82102e-106	1.22528e-101	0.255	0.441	glutathione S-transferase kappa 1 [Source:HGNC Symbol;Acc:HGNC:16906]	GO:0004364(glutathione transferase activity);GO:0004602(glutathione peroxidase activity);GO:0005102(signaling receptor binding);GO:0005515(protein binding);GO:0005622(intracellular);GO:0005739(mitochondrion);GO:0005759(mitochondrial matrix);GO:0005777(peroxisome);GO:0005782(peroxisomal matrix);GO:0005829(cytosol);GO:0006625(protein targeting to peroxisome);GO:0006749(glutathione metabolic process…	00480(Glutathione metabolism);00980(Metabolism of xenobiotics by cytochrome P450);00982(Drug metabolism - cytochrome P450);04146(Peroxisome);05204(Chemical carcinogenesis)	down
ENSG00000249992	TMEM158	0.424489	3.02146e-106	1.31234e-101	0.119	0.013	transmembrane protein 158 (gene/pseudogene) [Source:HGNC Symbol;Acc:HGNC:30293]	GO:0016020(membrane);GO:0016021(integral component of membrane);GO:0042277(peptide binding)	NA	up
ENSG00000002587	HS3ST1	0.41096	5.27353e-106	2.2905e-101	0.146	0.024	heparan sulfate-glucosamine 3-sulfotransferase 1 [Source:HGNC Symbol;Acc:HGNC:5194]	GO:0005794(Golgi apparatus);GO:0005796(Golgi lumen);GO:0006024(glycosaminoglycan biosynthetic process);GO:0008146(sulfotransferase activity);GO:0008467([heparan sulfate]-glucosamine 3-sulfotransferase 1 activity);GO:0015012(heparan sulfate proteoglycan biosynthetic process);GO:0016740(transferase activity);GO:0034483(heparan sulfate sulfotransferase activity)	00534(Glycosaminoglycan biosynthesis - heparan sulfate / heparin)	up
ENSG00000203710	CR1	-0.468117	6.78503e-106	2.94701e-101	0.121	0.285	complement C3b/C4b receptor 1 (Knops blood group) [Source:HGNC Symbol;Acc:HGNC:2334]	GO:0001618(virus receptor activity);GO:0001851(complement component C3b binding);GO:0001855(complement component C4b binding);GO:0001861(complement component C4b receptor activity);GO:0002376(immune system process);GO:0002430(complement receptor mediated signaling pathway);GO:0004877(complement component C3b receptor activity);GO:0005886(plasma membrane);GO:0005887(integral component of plasma me…	04610(Complement and coagulation cascades);04640(Hematopoietic cell lineage);05134(Legionellosis);05140(Leishmaniasis);05144(Malaria);05152(Tuberculosis)	down
ENSG00000143549	TPM3	0.347471	8.99378e-106	3.90636e-101	0.875	0.856	tropomyosin 3 [Source:HGNC Symbol;Acc:HGNC:12012]	GO:0001725(stress fiber);GO:0003674(molecular_function);GO:0003779(actin binding);GO:0005515(protein binding);GO:0005737(cytoplasm);GO:0005829(cytosol);GO:0005856(cytoskeleton);GO:0005862(muscle thin filament tropomyosin);GO:0005884(actin filament);GO:0006936(muscle contraction);GO:0007015(actin filament organization);GO:0015629(actin cytoskeleton);GO:0030049(muscle filament sliding);GO:0051015(a…	04260(Cardiac muscle contraction);04261(Adrenergic signaling in cardiomyocytes);05200(Pathways in cancer);05216(Thyroid cancer);05410(Hypertrophic cardiomyopathy (HCM));05414(Dilated cardiomyopathy (DCM))	up
ENSG00000077782	FGFR1	-0.480147	9.84937e-106	4.27797e-101	0.074	0.208	fibroblast growth factor receptor 1 [Source:HGNC Symbol;Acc:HGNC:3688]	GO:0000122(negative regulation of transcription by RNA polymerase II);GO:0000165(MAPK cascade);GO:0000166(nucleotide binding);GO:0001501(skeletal system development);GO:0001525(angiogenesis);GO:0001657(ureteric bud development);GO:0001701(in utero embryonic development);GO:0001759(organ induction);GO:0001764(neuron migration);GO:0002053(positive regulation of mesenchymal cell proliferation);GO:00…	04010(MAPK signaling pathway);04014(Ras signaling pathway);04015(Rap1 signaling pathway);04151(PI3K-Akt signaling pathway);04520(Adherens junction);04550(Signaling pathways regulating pluripotency of stem cells);04714(Thermogenesis);04810(Regulation of actin cytoskeleton);04928(Parathyroid hormone synthesis, secretion and action);05200(Pathways in cancer);05205(Proteoglycans in cancer);05215(Pros…	down
ENSG00000145494	NDUFS6	0.557069	1.43588e-105	6.2366e-101	0.51	0.339	NADH:ubiquinone oxidoreductase subunit S6 [Source:HGNC Symbol;Acc:HGNC:7713]	GO:0005739(mitochondrion);GO:0005743(mitochondrial inner membrane);GO:0005747(mitochondrial respiratory chain complex I);GO:0006120(mitochondrial electron transport, NADH to ubiquinone);GO:0006631(fatty acid metabolic process);GO:0006936(muscle contraction);GO:0008137(NADH dehydrogenase (ubiquinone) activity);GO:0009055(electron transfer activity);GO:0010259(multicellular organism aging);GO:00160…	00190(Oxidative phosphorylation);04714(Thermogenesis);04723(Retrograde endocannabinoid signaling);04932(Non-alcoholic fatty liver disease (NAFLD));05010(Alzheimer disease);05012(Parkinson disease);05016(Huntington disease)	up
ENSG00000189159	JPT1	0.557906	1.55337e-105	6.74689e-101	0.4	0.223	Jupiter microtubule associated homolog 1 [Source:HGNC Symbol;Acc:HGNC:14569]	GO:0005634(nucleus);GO:0005730(nucleolus);GO:0005737(cytoplasm);GO:0031965(nuclear membrane)	NA	up
ENSG00000075618	FSCN1	-0.47537	1.58334e-105	6.87707e-101	0.084	0.218	fascin actin-bundling protein 1 [Source:HGNC Symbol;Acc:HGNC:11148]	GO:0001725(stress fiber);GO:0001726(ruffle);GO:0002102(podosome);GO:0003723(RNA binding);GO:0003779(actin binding);GO:0005515(protein binding);GO:0005737(cytoplasm);GO:0005829(cytosol);GO:0005856(cytoskeleton);GO:0005902(microvillus);GO:0005911(cell-cell junction);GO:0007015(actin filament organization);GO:0007043(cell-cell junction assembly);GO:0007163(establishment or maintenance of cell polari…	05206(MicroRNAs in cancer)	down
ENSG00000126934	MAP2K2	0.532457	4.135e-105	1.79599e-100	0.371	0.2	mitogen-activated protein kinase kinase 2 [Source:HGNC Symbol;Acc:HGNC:6842]	GO:0000165(MAPK cascade);GO:0000166(nucleotide binding);GO:0000187(activation of MAPK activity);GO:0004672(protein kinase activity);GO:0004674(protein serine/threonine kinase activity);GO:0004708(MAP kinase kinase activity);GO:0004712(protein serine/threonine/tyrosine kinase activity);GO:0004713(protein tyrosine kinase activity);GO:0005515(protein binding);GO:0005524(ATP binding);GO:0005576(extra…	01521(EGFR tyrosine kinase inhibitor resistance);01522(Endocrine resistance);04010(MAPK signaling pathway);04012(ErbB signaling pathway);04014(Ras signaling pathway);04015(Rap1 signaling pathway);04022(cGMP-PKG signaling pathway);04024(cAMP signaling pathway);04066(HIF-1 signaling pathway);04068(FoxO signaling pathway);04071(Sphingolipid signaling pathway);04072(Phospholipase D signaling pathway)…	up
ENSG00000030582	GRN	-0.424877	5.61529e-105	2.43895e-100	0.729	0.854	granulin precursor [Source:HGNC Symbol;Acc:HGNC:4601]	GO:0002265(astrocyte activation involved in immune response);GO:0002282(microglial cell activation involved in immune response);GO:0003723(RNA binding);GO:0005125(cytokine activity);GO:0005515(protein binding);GO:0005576(extracellular region);GO:0005615(extracellular space);GO:0005764(lysosome);GO:0005765(lysosomal membrane);GO:0005768(endosome);GO:0005770(late endosome);GO:0005783(endoplasmic re…	NA	down
ENSG00000111786	SRSF9	0.552583	6.4174e-105	2.78733e-100	0.457	0.284	serine and arginine rich splicing factor 9 [Source:HGNC Symbol;Acc:HGNC:10791]	GO:0000381(regulation of alternative mRNA splicing, via spliceosome);GO:0000398(mRNA splicing, via spliceosome);GO:0003676(nucleic acid binding);GO:0003723(RNA binding);GO:0005515(protein binding);GO:0005634(nucleus);GO:0005654(nucleoplasm);GO:0005730(nucleolus);GO:0006376(mRNA splice site selection);GO:0006397(mRNA processing);GO:0006405(RNA export from nucleus);GO:0006406(mRNA export from nucle…	03040(Spliceosome);05168(Herpes simplex virus 1 infection)	up
ENSG00000152795	HNRNPDL	0.488068	1.29732e-104	5.63477e-100	0.69	0.579	heterogeneous nuclear ribonucleoprotein D like [Source:HGNC Symbol;Acc:HGNC:5037]	GO:0003676(nucleic acid binding);GO:0003677(DNA binding);GO:0003723(RNA binding);GO:0005515(protein binding);GO:0005634(nucleus);GO:0005654(nucleoplasm);GO:0005737(cytoplasm);GO:0005829(cytosol);GO:0008143(poly(A) binding);GO:0034046(poly(G) binding);GO:0035722(interleukin-12-mediated signaling pathway);GO:0043565(sequence-specific DNA binding);GO:1990837(sequence-specific double-stranded DNA bin…	NA	up
ENSG00000123349	PFDN5	0.372472	1.43981e-104	6.25365e-100	0.913	0.891	prefoldin subunit 5 [Source:HGNC Symbol;Acc:HGNC:8869]	GO:0003714(transcription corepressor activity);GO:0005515(protein binding);GO:0005634(nucleus);GO:0005737(cytoplasm);GO:0006355(regulation of transcription, DNA-templated);GO:0006457(protein folding);GO:0016272(prefoldin complex);GO:0045892(negative regulation of transcription, DNA-templated);GO:0051082(unfolded protein binding);GO:0060041(retina development in camera-type eye);GO:0090090(negativ…	NA	up
ENSG00000173905	GOLIM4	-0.536675	1.46221e-104	6.35098e-100	0.178	0.339	golgi integral membrane protein 4 [Source:HGNC Symbol;Acc:HGNC:15448]	GO:0000139(Golgi membrane);GO:0005768(endosome);GO:0005794(Golgi apparatus);GO:0005796(Golgi lumen);GO:0005801(cis-Golgi network);GO:0010008(endosome membrane);GO:0016020(membrane);GO:0016021(integral component of membrane);GO:0030133(transport vesicle);GO:0030139(endocytic vesicle);GO:0032580(Golgi cisterna membrane)	NA	down
ENSG00000176340	COX8A	0.4958	3.60227e-104	1.56461e-99	0.659	0.525	cytochrome c oxidase subunit 8A [Source:HGNC Symbol;Acc:HGNC:2294]	GO:0004129(cytochrome-c oxidase activity);GO:0005515(protein binding);GO:0005739(mitochondrion);GO:0005743(mitochondrial inner membrane);GO:0006091(generation of precursor metabolites and energy);GO:0006123(mitochondrial electron transport, cytochrome c to oxygen);GO:0016020(membrane);GO:0016021(integral component of membrane);GO:0022900(electron transport chain);GO:0045277(respiratory chain comp…	00190(Oxidative phosphorylation);04260(Cardiac muscle contraction);04714(Thermogenesis);04932(Non-alcoholic fatty liver disease (NAFLD));05010(Alzheimer disease);05012(Parkinson disease);05016(Huntington disease)	up
ENSG00000205364	MT1M	-0.508933	4.68534e-104	2.03503e-99	0.037	0.146	metallothionein 1M [Source:HGNC Symbol;Acc:HGNC:14296]	GO:0005634(nucleus);GO:0005737(cytoplasm);GO:0006882(cellular zinc ion homeostasis);GO:0008270(zinc ion binding);GO:0010273(detoxification of copper ion);GO:0045926(negative regulation of growth);GO:0046872(metal ion binding);GO:0048471(perinuclear region of cytoplasm);GO:0071276(cellular response to cadmium ion);GO:0071280(cellular response to copper ion);GO:0071294(cellular response to zinc ion)	04978(Mineral absorption)	down
ENSG00000135124	P2RX4	0.574227	5.20186e-104	2.25938e-99	0.384	0.208	purinergic receptor P2X 4 [Source:HGNC Symbol;Acc:HGNC:8535]	GO:0001614(purinergic nucleotide receptor activity);GO:0001894(tissue homeostasis);GO:0002028(regulation of sodium ion transport);GO:0002931(response to ischemia);GO:0004931(extracellularly ATP-gated cation channel activity);GO:0005102(signaling receptor binding);GO:0005216(ion channel activity);GO:0005507(copper ion binding);GO:0005515(protein binding);GO:0005524(ATP binding);GO:0005639(integral…	04020(Calcium signaling pathway);04080(Neuroactive ligand-receptor interaction)	up
ENSG00000183049	CAMK1D	-0.405282	8.552e-104	3.71448e-99	0.075	0.215	calcium/calmodulin dependent protein kinase ID [Source:HGNC Symbol;Acc:HGNC:19341]	GO:0000166(nucleotide binding);GO:0003824(catalytic activity);GO:0004672(protein kinase activity);GO:0004674(protein serine/threonine kinase activity);GO:0004683(calmodulin-dependent protein kinase activity);GO:0005516(calmodulin binding);GO:0005524(ATP binding);GO:0005634(nucleus);GO:0005737(cytoplasm);GO:0006468(protein phosphorylation);GO:0006954(inflammatory response);GO:0007399(nervous syste…	04020(Calcium signaling pathway);04921(Oxytocin signaling pathway);04925(Aldosterone synthesis and secretion);05214(Glioma)	down
ENSG00000107719	PALD1	-0.233927	1.18102e-103	5.12962e-99	0.006	0.072	phosphatase domain containing paladin 1 [Source:HGNC Symbol;Acc:HGNC:23530]	GO:0004722(protein serine/threonine phosphatase activity);GO:0004725(protein tyrosine phosphatase activity);GO:0005515(protein binding);GO:0005737(cytoplasm);GO:0005829(cytosol);GO:0006470(protein dephosphorylation);GO:0035335(peptidyl-tyrosine dephosphorylation)	NA	no_diff
ENSG00000170144	HNRNPA3	0.513722	1.38792e-103	6.0283e-99	0.638	0.496	heterogeneous nuclear ribonucleoprotein A3 [Source:HGNC Symbol;Acc:HGNC:24941]	GO:0000398(mRNA splicing, via spliceosome);GO:0003676(nucleic acid binding);GO:0003723(RNA binding);GO:0003729(mRNA binding);GO:0005515(protein binding);GO:0005634(nucleus);GO:0005654(nucleoplasm);GO:0005681(spliceosomal complex);GO:0005737(cytoplasm);GO:0006397(mRNA processing);GO:0008380(RNA splicing);GO:0014069(postsynaptic density);GO:0016070(RNA metabolic process);GO:0035770(ribonucleoprotei…	03040(Spliceosome)	up
ENSG00000168685	IL7R	0.523498	1.46707e-103	6.37208e-99	0.194	0.053	interleukin 7 receptor [Source:HGNC Symbol;Acc:HGNC:6024]	GO:0000018(regulation of DNA recombination);GO:0000902(cell morphogenesis);GO:0001915(negative regulation of T cell mediated cytotoxicity);GO:0002377(immunoglobulin production);GO:0003823(antigen binding);GO:0004896(cytokine receptor activity);GO:0004917(interleukin-7 receptor activity);GO:0005515(protein binding);GO:0005576(extracellular region);GO:0005886(plasma membrane);GO:0006955(immune resp…	04060(Cytokine-cytokine receptor interaction);04068(FoxO signaling pathway);04151(PI3K-Akt signaling pathway);04630(Jak-STAT signaling pathway);04640(Hematopoietic cell lineage);05200(Pathways in cancer);05340(Primary immunodeficiency)	up
ENSG00000187210	GCNT1	-0.40224	1.6179e-103	7.02718e-99	0.063	0.19	glucosaminyl (N-acetyl) transferase 1 [Source:HGNC Symbol;Acc:HGNC:4203]	GO:0000139(Golgi membrane);GO:0003829(beta-1,3-galactosyl-O-glycosyl-glycoprotein beta-1,6-N-acetylglucosaminyltransferase activity);GO:0005515(protein binding);GO:0005615(extracellular space);GO:0005794(Golgi apparatus);GO:0005802(trans-Golgi network);GO:0006486(protein glycosylation);GO:0008375(acetylglucosaminyltransferase activity);GO:0009101(glycoprotein biosynthetic process);GO:0016020(memb…	00512(Mucin type O-glycan biosynthesis)	down
ENSG00000129515	SNX6	-0.508771	1.6799e-103	7.2965e-99	0.463	0.635	sorting nexin 6 [Source:HGNC Symbol;Acc:HGNC:14970]	GO:0005515(protein binding);GO:0005623(cell);GO:0005634(nucleus);GO:0005737(cytoplasm);GO:0005764(lysosome);GO:0005768(endosome);GO:0005769(early endosome);GO:0005829(cytosol);GO:0006886(intracellular protein transport);GO:0007175(negative regulation of epidermal growth factor-activated receptor activity);GO:0008289(lipid binding);GO:0015031(protein transport);GO:0016020(membrane);GO:0016241(regu…	04144(Endocytosis)	down
ENSG00000138413	IDH1	-0.507158	2.08471e-103	9.05471e-99	0.178	0.352	isocitrate dehydrogenase (NADP(+)) 1, cytosolic [Source:HGNC Symbol;Acc:HGNC:5382]	GO:0000287(magnesium ion binding);GO:0004448(isocitrate dehydrogenase activity);GO:0004450(isocitrate dehydrogenase (NADP+) activity);GO:0005102(signaling receptor binding);GO:0005576(extracellular region);GO:0005737(cytoplasm);GO:0005739(mitochondrion);GO:0005777(peroxisome);GO:0005782(peroxisomal matrix);GO:0005829(cytosol);GO:0006097(glyoxylate cycle);GO:0006099(tricarboxylic acid cycle);GO:00…	00020(Citrate cycle (TCA cycle));00480(Glutathione metabolism);04146(Peroxisome);05230(Central carbon metabolism in cancer)	down
ENSG00000279602	AC109326.1	0.421028	2.97885e-103	1.29383e-98	0.144	0.025	TEC	NA	NA	up
ENSG00000142507	PSMB6	0.539448	4.71394e-103	2.04745e-98	0.419	0.245	proteasome subunit beta 6 [Source:HGNC Symbol;Acc:HGNC:9543]	GO:0000165(MAPK cascade);GO:0000209(protein polyubiquitination);GO:0000502(proteasome complex);GO:0002223(stimulatory C-type lectin receptor signaling pathway);GO:0002479(antigen processing and presentation of exogenous peptide antigen via MHC class I, TAP-dependent);GO:0004175(endopeptidase activity);GO:0004298(threonine-type endopeptidase activity);GO:0005634(nucleus);GO:0005654(nucleoplasm);GO…	03050(Proteasome)	up
ENSG00000277632	CCL3	0.926683	5.32668e-103	2.31359e-98	0.643	0.555	C-C motif chemokine ligand 3 [Source:HGNC Symbol;Acc:HGNC:10627]	GO:0000165(MAPK cascade);GO:0001649(osteoblast differentiation);GO:0001775(cell activation);GO:0002548(monocyte chemotaxis);GO:0004672(protein kinase activity);GO:0004698(calcium-dependent protein kinase C activity);GO:0005125(cytokine activity);GO:0005515(protein binding);GO:0005576(extracellular region);GO:0005615(extracellular space);GO:0005737(cytoplasm);GO:0005829(cytosol);GO:0006816(calcium…	04060(Cytokine-cytokine receptor interaction);04062(Chemokine signaling pathway);04620(Toll-like receptor signaling pathway);05132(Salmonella infection);05142(Chagas disease (American trypanosomiasis));05163(Human cytomegalovirus infection);05323(Rheumatoid arthritis)	up
ENSG00000135624	CCT7	0.515054	1.14287e-102	4.96394e-98	0.289	0.125	chaperonin containing TCP1 subunit 7 [Source:HGNC Symbol;Acc:HGNC:1622]	GO:0000166(nucleotide binding);GO:0005515(protein binding);GO:0005524(ATP binding);GO:0005737(cytoplasm);GO:0005829(cytosol);GO:0005832(chaperonin-containing T-complex);GO:0005874(microtubule);GO:0006457(protein folding);GO:0007339(binding of sperm to zona pellucida);GO:0032212(positive regulation of telomere maintenance via telomerase);GO:0042026(protein refolding);GO:0042802(identical protein b…	NA	up
ENSG00000178951	ZBTB7A	-0.528528	1.19661e-102	5.19735e-98	0.359	0.543	zinc finger and BTB domain containing 7A [Source:HGNC Symbol;Acc:HGNC:18078]	GO:0000122(negative regulation of transcription by RNA polymerase II);GO:0000381(regulation of alternative mRNA splicing, via spliceosome);GO:0000978(RNA polymerase II proximal promoter sequence-specific DNA binding);GO:0000981(DNA-binding transcription factor activity, RNA polymerase II-specific);GO:0001222(transcription corepressor binding);GO:0001227(DNA-binding transcription repressor activit…	NA	down
ENSG00000174748	RPL15	-0.393296	2.19751e-102	9.54466e-98	0.876	0.929	ribosomal protein L15 [Source:HGNC Symbol;Acc:HGNC:10306]	GO:0000184(nuclear-transcribed mRNA catabolic process, nonsense-mediated decay);GO:0002181(cytoplasmic translation);GO:0003723(RNA binding);GO:0003735(structural constituent of ribosome);GO:0005515(protein binding);GO:0005622(intracellular);GO:0005634(nucleus);GO:0005829(cytosol);GO:0005840(ribosome);GO:0006412(translation);GO:0006413(translational initiation);GO:0006614(SRP-dependent cotranslati…	03010(Ribosome)	down
ENSG00000168701	TMEM208	0.493682	6.48255e-102	2.81563e-97	0.294	0.123	transmembrane protein 208 [Source:HGNC Symbol;Acc:HGNC:25015]	GO:0005773(vacuole);GO:0005783(endoplasmic reticulum);GO:0005789(endoplasmic reticulum membrane);GO:0006624(vacuolar protein processing);GO:0006914(autophagy);GO:0016020(membrane);GO:0016021(integral component of membrane)	NA	up
ENSG00000171766	GATM	-0.342681	8.05969e-102	3.50065e-97	0.033	0.138	glycine amidinotransferase [Source:HGNC Symbol;Acc:HGNC:4175]	GO:0005737(cytoplasm);GO:0005739(mitochondrion);GO:0005743(mitochondrial inner membrane);GO:0005758(mitochondrial intermembrane space);GO:0006600(creatine metabolic process);GO:0006601(creatine biosynthetic process);GO:0007275(multicellular organism development);GO:0007611(learning or memory);GO:0014889(muscle atrophy);GO:0015067(amidinotransferase activity);GO:0015068(glycine amidinotransferase …	00260(Glycine, serine and threonine metabolism);00330(Arginine and proline metabolism)	down
ENSG00000176788	BASP1	0.745244	1.71161e-101	7.43422e-97	0.405	0.262	brain abundant membrane attached signal protein 1 [Source:HGNC Symbol;Acc:HGNC:957]	GO:0003714(transcription corepressor activity);GO:0005515(protein binding);GO:0005634(nucleus);GO:0005737(cytoplasm);GO:0005856(cytoskeleton);GO:0005886(plasma membrane);GO:0007356(thorax and anterior abdomen determination);GO:0008180(COP9 signalosome);GO:0008406(gonad development);GO:0016020(membrane);GO:0016607(nuclear speck);GO:0019904(protein domain specific binding);GO:0021762(substantia nig…	NA	up
ENSG00000108298	RPL19	-0.356286	1.87629e-101	8.14946e-97	0.952	0.975	ribosomal protein L19 [Source:HGNC Symbol;Acc:HGNC:10312]	GO:0000184(nuclear-transcribed mRNA catabolic process, nonsense-mediated decay);GO:0002181(cytoplasmic translation);GO:0003723(RNA binding);GO:0003735(structural constituent of ribosome);GO:0005515(protein binding);GO:0005622(intracellular);GO:0005829(cytosol);GO:0005840(ribosome);GO:0005925(focal adhesion);GO:0006412(translation);GO:0006413(translational initiation);GO:0006614(SRP-dependent cotr…	03010(Ribosome)	down
ENSG00000122378	PRXL2A	-0.317003	2.29733e-101	9.97823e-97	0.025	0.121	peroxiredoxin like 2A [Source:HGNC Symbol;Acc:HGNC:28651]	GO:0005576(extracellular region);GO:0005737(cytoplasm);GO:0016209(antioxidant activity);GO:0045670(regulation of osteoclast differentiation);GO:0055114(oxidation-reduction process);GO:0098869(cellular oxidant detoxification)	NA	down
ENSG00000089195	TRMT6	0.490368	2.42076e-101	1.05143e-96	0.194	0.056	tRNA methyltransferase 6 [Source:HGNC Symbol;Acc:HGNC:20900]	GO:0003723(RNA binding);GO:0005634(nucleus);GO:0005654(nucleoplasm);GO:0006400(tRNA modification);GO:0008033(tRNA processing);GO:0016429(tRNA (adenine-N1-)-methyltransferase activity);GO:0030488(tRNA methylation);GO:0031515(tRNA (m1A) methyltransferase complex);GO:0080009(mRNA methylation)	NA	up
ENSG00000189241	TSPYL1	-0.416859	3.31283e-101	1.4389e-96	0.08	0.219	TSPY like 1 [Source:HGNC Symbol;Acc:HGNC:12382]	GO:0005634(nucleus);GO:0005730(nucleolus);GO:0006334(nucleosome assembly);GO:0008150(biological_process);GO:0019899(enzyme binding)	NA	down
ENSG00000162711	NLRP3	0.706193	3.55867e-101	1.54567e-96	0.432	0.27	NLR family pyrin domain containing 3 [Source:HGNC Symbol;Acc:HGNC:16400]	GO:0000139(Golgi membrane);GO:0000166(nucleotide binding);GO:0002374(cytokine secretion involved in immune response);GO:0002376(immune system process);GO:0002674(negative regulation of acute inflammatory response);GO:0002830(positive regulation of type 2 immune response);GO:0005515(protein binding);GO:0005524(ATP binding);GO:0005576(extracellular region);GO:0005634(nucleus);GO:0005737(cytoplasm);…	04217(Necroptosis);04621(NOD-like receptor signaling pathway);04625(C-type lectin receptor signaling pathway);05133(Pertussis);05164(Influenza A)	up
ENSG00000183779	ZNF703	-0.387144	3.95053e-101	1.71588e-96	0.069	0.199	zinc finger protein 703 [Source:HGNC Symbol;Acc:HGNC:25883]	GO:0003676(nucleic acid binding);GO:0005515(protein binding);GO:0005634(nucleus);GO:0005737(cytoplasm);GO:0006355(regulation of transcription, DNA-templated);GO:0008284(positive regulation of cell population proliferation);GO:0010718(positive regulation of epithelial to mesenchymal transition);GO:0016363(nuclear matrix);GO:0017015(regulation of transforming growth factor beta receptor signaling p…	NA	down
ENSG00000210082	MT-RNR2	-0.303151	5.34721e-101	2.32251e-96	0.999	0.998	mitochondrially encoded 16S RNA [Source:HGNC Symbol;Acc:HGNC:7471]	NA	NA	down
ENSG00000173083	HPSE	0.534796	9.2749e-101	4.02846e-96	0.205	0.075	heparanase [Source:HGNC Symbol;Acc:HGNC:5164]	GO:0004566(beta-glucuronidase activity);GO:0005515(protein binding);GO:0005576(extracellular region);GO:0005634(nucleus);GO:0005654(nucleoplasm);GO:0005764(lysosome);GO:0005765(lysosomal membrane);GO:0006027(glycosaminoglycan catabolic process);GO:0006029(proteoglycan metabolic process);GO:0007155(cell adhesion);GO:0007160(cell-matrix adhesion);GO:0010575(positive regulation of vascular endotheli…	00531(Glycosaminoglycan degradation);05205(Proteoglycans in cancer)	up
ENSG00000104549	SQLE	0.474406	1.35389e-100	5.88049e-96	0.167	0.039	squalene epoxidase [Source:HGNC Symbol;Acc:HGNC:11279]	GO:0004506(squalene monooxygenase activity);GO:0005783(endoplasmic reticulum);GO:0005789(endoplasmic reticulum membrane);GO:0006695(cholesterol biosynthetic process);GO:0006725(cellular aromatic compound metabolic process);GO:0008203(cholesterol metabolic process);GO:0010033(response to organic substance);GO:0016020(membrane);GO:0016021(integral component of membrane);GO:0016126(sterol biosynthet…	00100(Steroid biosynthesis)	up
ENSG00000102007	PLP2	0.564211	2.42659e-100	1.05396e-95	0.421	0.242	proteolipid protein 2 [Source:HGNC Symbol;Acc:HGNC:9087]	GO:0005515(protein binding);GO:0005783(endoplasmic reticulum);GO:0005789(endoplasmic reticulum membrane);GO:0005886(plasma membrane);GO:0006811(ion transport);GO:0006935(chemotaxis);GO:0015075(ion transmembrane transporter activity);GO:0016020(membrane);GO:0016021(integral component of membrane);GO:0019221(cytokine-mediated signaling pathway);GO:0019956(chemokine binding);GO:0034220(ion transmemb…	NA	up
ENSG00000162734	PEA15	0.539268	6.79276e-100	2.95037e-95	0.342	0.165	proliferation and apoptosis adaptor protein 15 [Source:HGNC Symbol;Acc:HGNC:8822]	GO:0000077(DNA damage checkpoint);GO:0000165(MAPK cascade);GO:0000187(activation of MAPK activity);GO:0005515(protein binding);GO:0005634(nucleus);GO:0005737(cytoplasm);GO:0005829(cytosol);GO:0005875(microtubule associated complex);GO:0006915(apoptotic process);GO:0008643(carbohydrate transport);GO:0042981(regulation of apoptotic process);GO:0043278(response to morphine);GO:0046325(negative regul…	NA	up
ENSG00000184588	PDE4B	0.667683	7.4611e-100	3.24066e-95	0.437	0.281	phosphodiesterase 4B [Source:HGNC Symbol;Acc:HGNC:8781]	GO:0000930(gamma-tubulin complex);GO:0001780(neutrophil homeostasis);GO:0004114(3',5'-cyclic-nucleotide phosphodiesterase activity);GO:0004115(3',5'-cyclic-AMP phosphodiesterase activity);GO:0005515(protein binding);GO:0005813(centrosome);GO:0005829(cytosol);GO:0005891(voltage-gated calcium channel complex);GO:0006198(cAMP catabolic process);GO:0007165(signal transduction);GO:0007186(G protein-co…	00230(Purine metabolism);04024(cAMP signaling pathway);04928(Parathyroid hormone synthesis, secretion and action);05032(Morphine addiction)	up
ENSG00000249001	AC093895.1	0.30252	8.54669e-100	3.71217e-95	0.088	0.003	novel transcript	NA	NA	no_diff
ENSG00000168994	PXDC1	-0.354677	1.09574e-99	4.75924e-95	0.036	0.139	PX domain containing 1 [Source:HGNC Symbol;Acc:HGNC:21361]	GO:0035091(phosphatidylinositol binding)	NA	down
ENSG00000078269	SYNJ2	0.412051	1.27784e-99	5.55016e-95	0.144	0.026	synaptojanin 2 [Source:HGNC Symbol;Acc:HGNC:11504]	GO:0003676(nucleic acid binding);GO:0003723(RNA binding);GO:0004439(phosphatidylinositol-4,5-bisphosphate 5-phosphatase activity);GO:0005515(protein binding);GO:0005737(cytoplasm);GO:0005829(cytosol);GO:0005856(cytoskeleton);GO:0005886(plasma membrane);GO:0006661(phosphatidylinositol biosynthetic process);GO:0007420(brain development);GO:0016020(membrane);GO:0016787(hydrolase activity);GO:0017124…	00562(Inositol phosphate metabolism);04070(Phosphatidylinositol signaling system)	up
ENSG00000161677	JOSD2	0.487618	2.14583e-99	9.32018e-95	0.277	0.112	Josephin domain containing 2 [Source:HGNC Symbol;Acc:HGNC:28853]	GO:0004843(thiol-dependent ubiquitin-specific protease activity);GO:0005737(cytoplasm);GO:0005829(cytosol);GO:0006508(proteolysis);GO:0008233(peptidase activity);GO:0016579(protein deubiquitination);GO:0016787(hydrolase activity);GO:0036459(thiol-dependent ubiquitinyl hydrolase activity)	NA	up
ENSG00000197019	SERTAD1	-0.505668	3.32175e-99	1.44277e-94	0.229	0.403	SERTA domain containing 1 [Source:HGNC Symbol;Acc:HGNC:17932]	GO:0000079(regulation of cyclin-dependent protein serine/threonine kinase activity);GO:0005515(protein binding);GO:0005634(nucleus);GO:0005737(cytoplasm);GO:0008284(positive regulation of cell population proliferation);GO:0030308(negative regulation of cell growth);GO:0045893(positive regulation of transcription, DNA-templated);GO:0045944(positive regulation of transcription by RNA polymerase II)	NA	down
ENSG00000198242	RPL23A	-0.430595	3.59615e-99	1.56195e-94	0.706	0.825	ribosomal protein L23a [Source:HGNC Symbol;Acc:HGNC:10317]	GO:0000027(ribosomal large subunit assembly);GO:0000184(nuclear-transcribed mRNA catabolic process, nonsense-mediated decay);GO:0003723(RNA binding);GO:0003735(structural constituent of ribosome);GO:0005515(protein binding);GO:0005622(intracellular);GO:0005634(nucleus);GO:0005730(nucleolus);GO:0005737(cytoplasm);GO:0005829(cytosol);GO:0005840(ribosome);GO:0006412(translation);GO:0006413(translati…	03010(Ribosome)	down
ENSG00000072135	PTPN18	-0.495776	4.2955e-99	1.86571e-94	0.256	0.44	protein tyrosine phosphatase, non-receptor type 18 [Source:HGNC Symbol;Acc:HGNC:9649]	GO:0001825(blastocyst formation);GO:0004721(phosphoprotein phosphatase activity);GO:0004725(protein tyrosine phosphatase activity);GO:0004726(non-membrane spanning protein tyrosine phosphatase activity);GO:0005515(protein binding);GO:0005634(nucleus);GO:0005654(nucleoplasm);GO:0005737(cytoplasm);GO:0005829(cytosol);GO:0006470(protein dephosphorylation);GO:0016311(dephosphorylation);GO:0016787(hyd…	NA	down
ENSG00000100354	TNRC6B	-0.504745	4.72582e-99	2.05261e-94	0.216	0.399	trinucleotide repeat containing 6B [Source:HGNC Symbol;Acc:HGNC:29190]	GO:0000932(P-body);GO:0003676(nucleic acid binding);GO:0003723(RNA binding);GO:0005515(protein binding);GO:0005654(nucleoplasm);GO:0005737(cytoplasm);GO:0005829(cytosol);GO:0006417(regulation of translation);GO:0007223(Wnt signaling pathway, calcium modulating pathway);GO:0010628(positive regulation of gene expression);GO:0010629(negative regulation of gene expression);GO:0031047(gene silencing b…	NA	down
ENSG00000116288	PARK7	0.520464	7.77743e-99	3.37805e-94	0.543	0.392	Parkinsonism associated deglycase [Source:HGNC Symbol;Acc:HGNC:16369]	GO:0000785(chromatin);GO:0001933(negative regulation of protein phosphorylation);GO:0001963(synaptic transmission, dopaminergic);GO:0002866(positive regulation of acute inflammatory response to antigenic stimulus);GO:0003713(transcription coactivator activity);GO:0003723(RNA binding);GO:0003729(mRNA binding);GO:0005102(signaling receptor binding);GO:0005507(copper ion binding);GO:0005515(protein …	05012(Parkinson disease)	up
ENSG00000065833	ME1	-0.431065	8.17675e-99	3.55149e-94	0.055	0.172	malic enzyme 1 [Source:HGNC Symbol;Acc:HGNC:6983]	GO:0004470(malic enzyme activity);GO:0004471(malate dehydrogenase (decarboxylating) (NAD+) activity);GO:0004473(malate dehydrogenase (decarboxylating) (NADP+) activity);GO:0005737(cytoplasm);GO:0005739(mitochondrion);GO:0005829(cytosol);GO:0005975(carbohydrate metabolic process);GO:0006090(pyruvate metabolic process);GO:0006108(malate metabolic process);GO:0006741(NADP biosynthetic process);GO:00…	00620(Pyruvate metabolism);03320(PPAR signaling pathway)	down
[truncated: 42,730 more rows]
